# Supplementary material for: Omics Technologies to Decipher Regulatory Networks in Granulocytic Cell Differentiation
Source: Biomolecules. 2021 Jun 18;11(6):907. doi: 10.3390/biom11060907 (PMC8233756; doi:10.3390/biom11060907)
Supplement: Supplementary file 1 [file biomolecules-11-00907-s001.zip]

Archive with 6 entries (6 files):
- biomolecules-1214844-supplementary.pdf
- Table S1.xlsx
- Table S2.xlsx
- Table S3.xlsx
- Table S4.xlsx
- Table S5.xlsx
