# Supplementary material for: Omics Technologies to Decipher Regulatory Networks in Granulocytic Cell Differentiation
Source: Biomolecules. 2021 Jun 18;11(6):907. doi: 10.3390/biom11060907 (PMC8233756; doi:10.3390/biom11060907)
Supplement: Supplementary file 1 [file biomolecules-11-00907-s001.zip › biomolecules-1214844-supplementary.pdf]

Supplementary materials

# Omics Technologies to Decipher Regulatory Networks in Granulocytic Cell Differentiation

Svetlana Novikova <sup>†</sup>, Olga Tikhonova <sup>†</sup>, Leonid Kurbatov, Tatiana Farafonova, Igor Vakhrushev, Alexey Lupatov, Konstantin Yarygin and Victor Zgoda <sup>\*</sup>

Orekhovich Institute of Biomedical Chemistry, Pogodinskaya 10, Moscow 119121, Russia; novikova.s.e3101@gmail.com (S.N.); ovt.facility@gmail.com (O.T.); kurbatovl@mail.ru (L.K.); farafonova.tatiana@gmail.com (T.F.); vakhrunya@gmail.com (I.V.); alupatov@inbox.ru (A.L.); kyarygin@yandex.ru (K.Y.); victor.zgoda@gmail.com (V.Z.)

<sup>\*</sup> Correspondence: victor.zgoda@gmail.com

<sup>†</sup> These authors contributed equally to this work

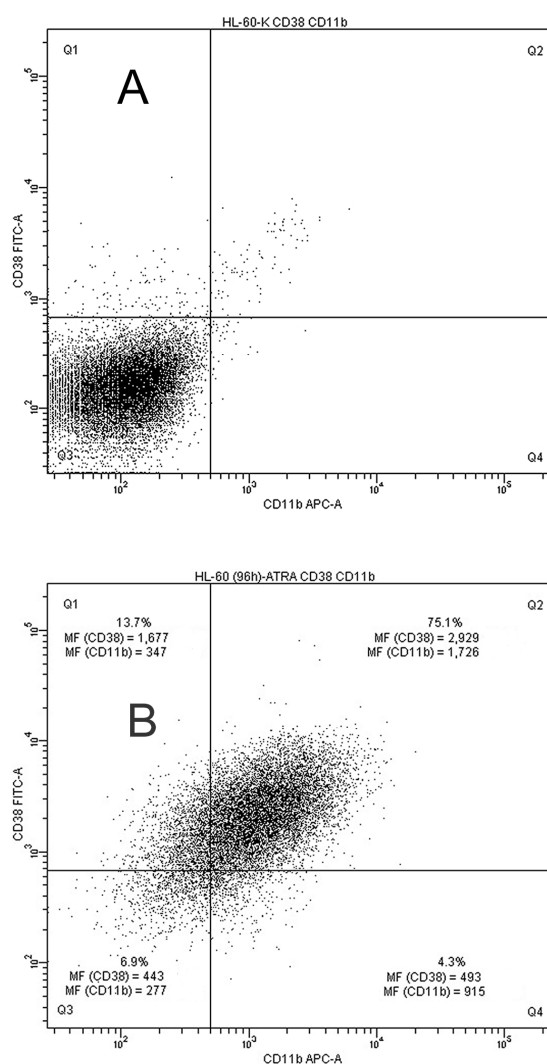

**Figure S1.** Evaluation of HL-60 cell line by the CD38 and CD11b expression level measured by flow cytometry: (a) untreated cells and (b) cells at 96 h after ATRA treatment.

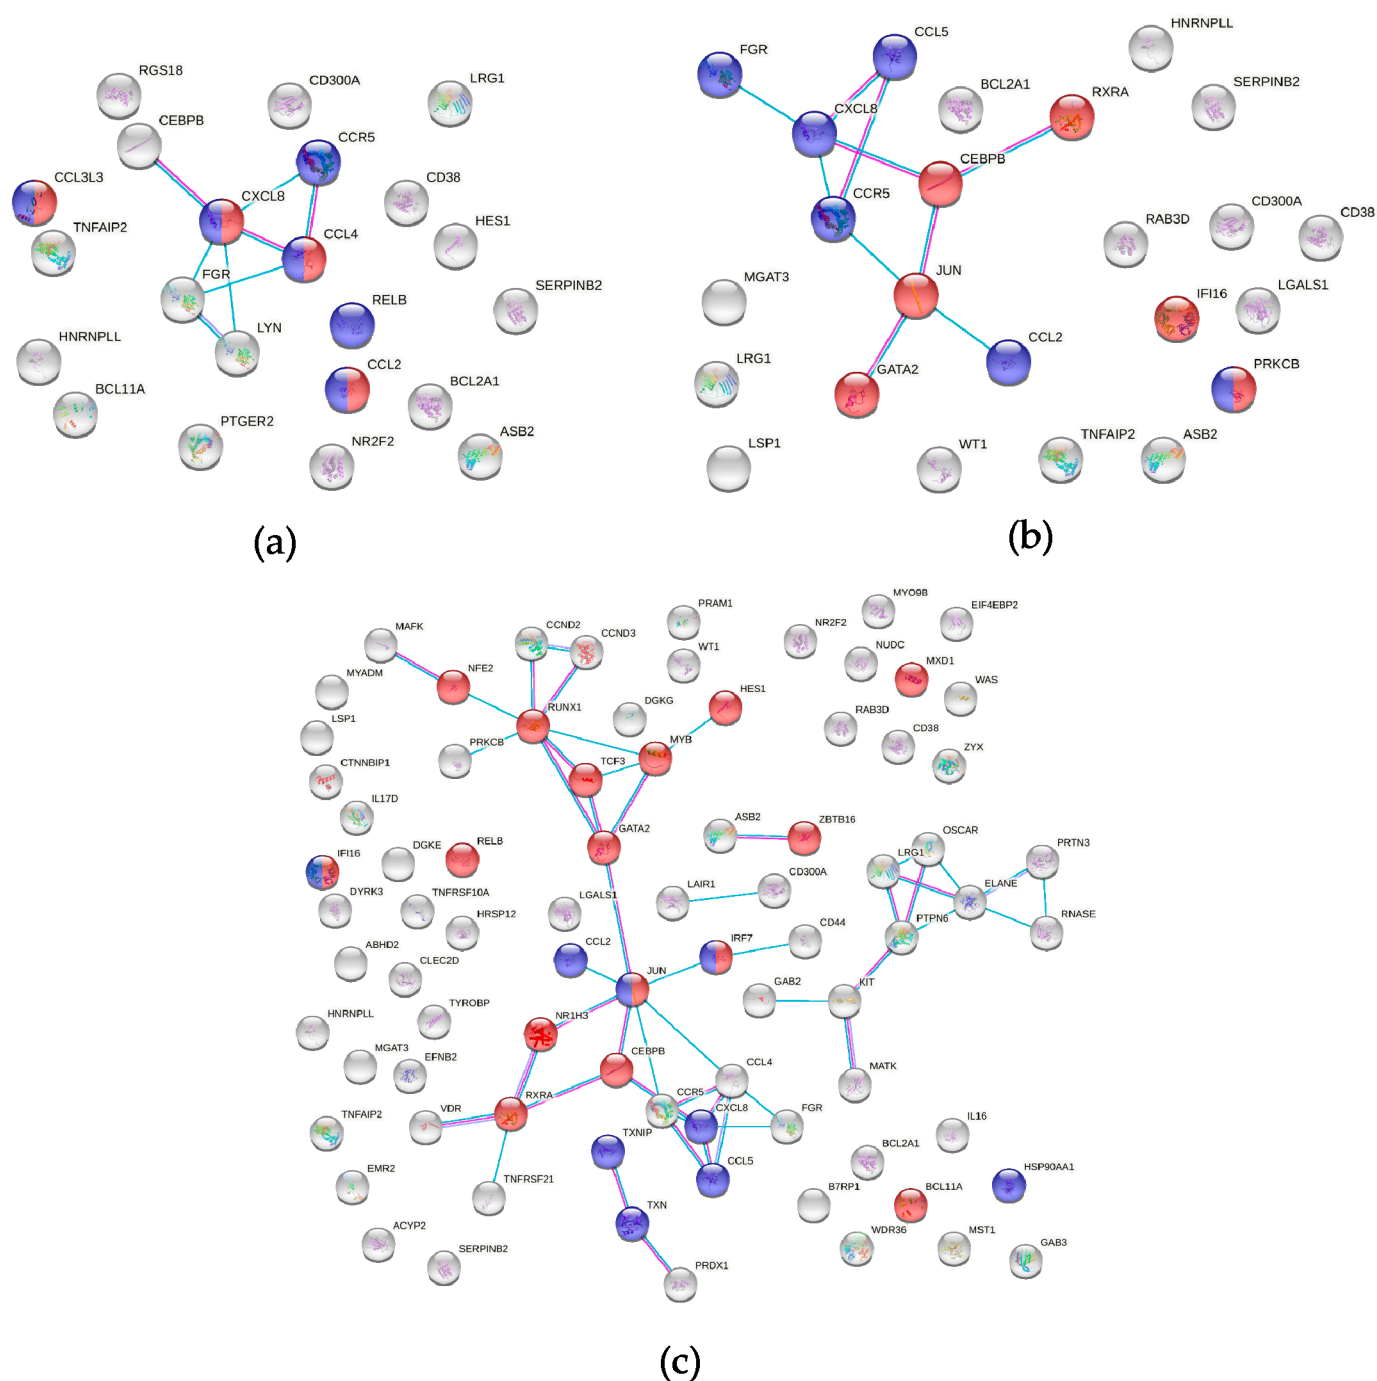

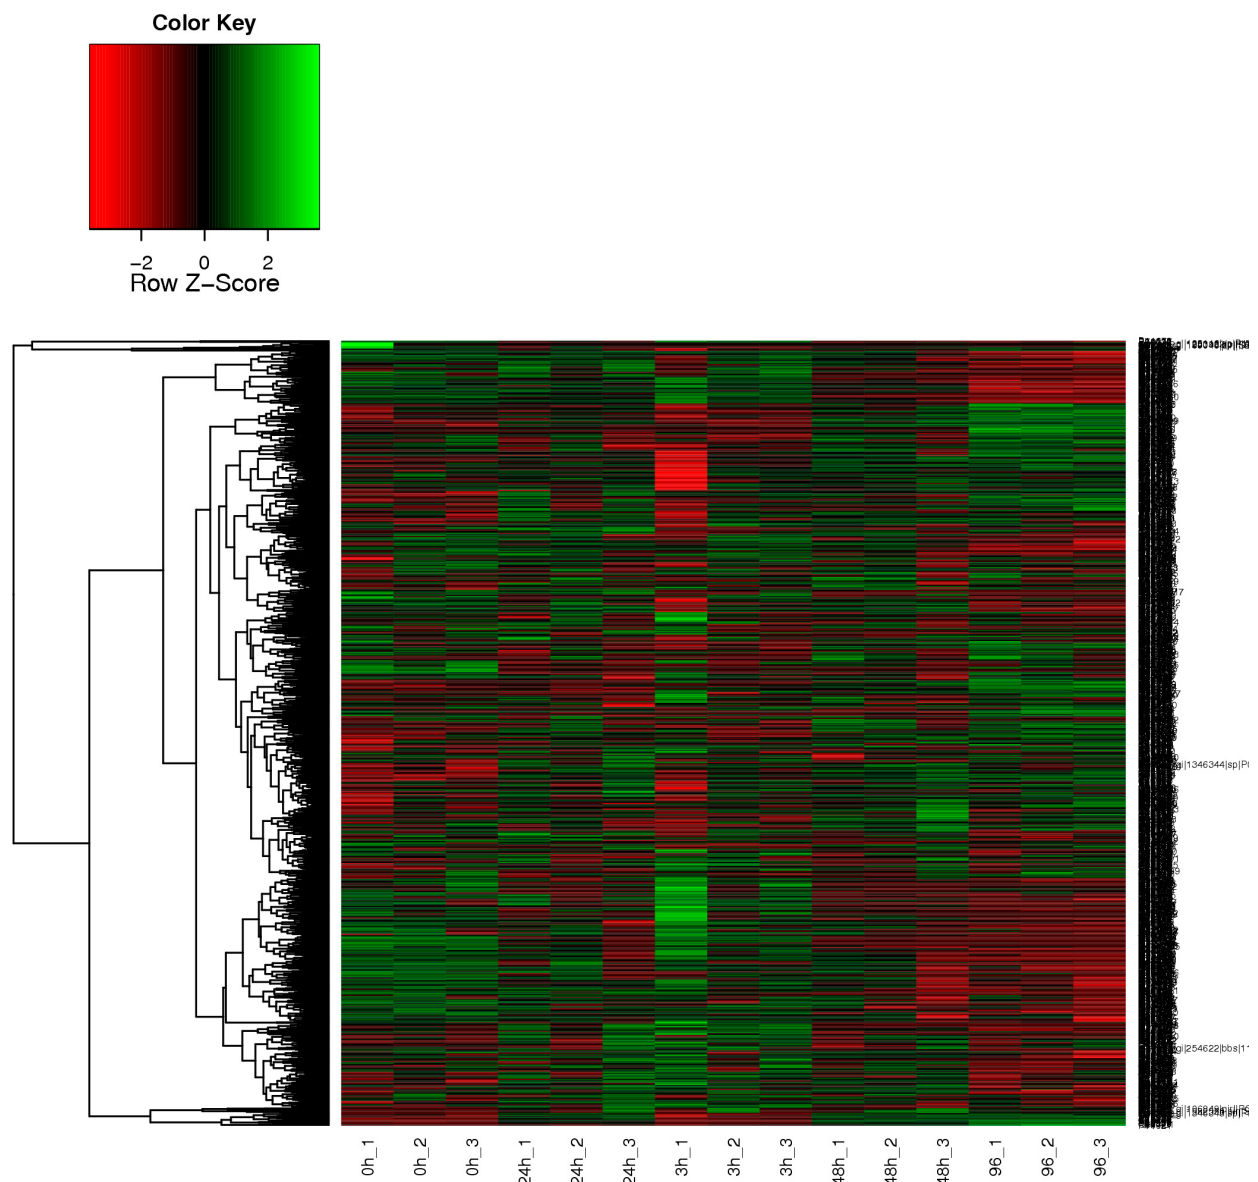

**Figure S3.** Heatmap of protein expression. Expression color coded from low (dark red) to high (dark green). The figure reflects clusterization of proteins identified at 0, 3, 24, 48 and 96 h after ATRA treatment in 3 biological replicates.

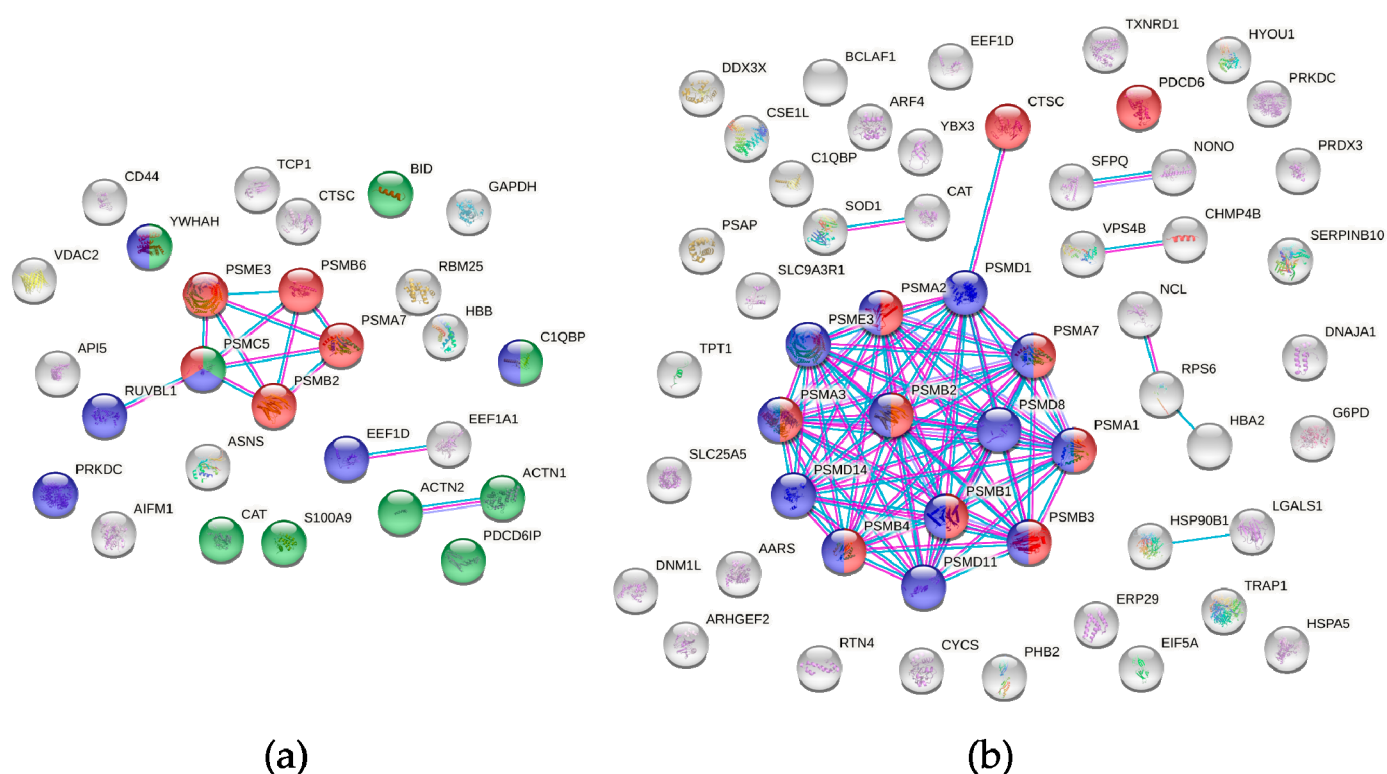

**Figure S4.** STRING interaction analysis of differentially expressed proteins (DEPs) assigned to group “programmed cell death” and/or “regulation of cell death” at 3 and 96 h after ATRA treatment; (a) 27 DEPs at 3 h after ATRA treatment enriched in interactions (PPI enrichment p-value = 0.000248), red, blue, and green nodes shows DEPs that have been annotated by Molecular function (GO) as belonging to “signaling receptor binding” group (FDR = 0.0045), and to “transcription factor binding” group (FDR = 0.0048), as well as by KEGG database as members of “Proteasome” pathway (FDR = 3.75e-07), respectively; (b) 54 DEPs at 96 h after ATRA treatment enriched in interactions (PPI enrichment p-value = 1.0e-16), red and blue nodes shows DEPs that have been annotated by Molecular function (GO) as belonging to “endopeptidase activity” group (FDR = 9.44e-06) and by KEGG database as members of “Proteasome” pathway (FDR = 1.38e-20), respectively.

**Table S6.** Transcription factors (TFs) that are responsible for the change in gene expression of Myeloid Cells Differentiation (MCD) group MCD at time points 3, 24 and 96 hours in the course of differentiation of HL-60 cells. TFs found also as potential regulators of differentially expressed proteins (see Table S8, below) are shown in bold. TFs demonstrating altered expression during ATRA-induced differentiation of HL-60 cells are underlined.

| TF gene name, 3 h                                                                 | TF gene name, 24 h                                                                                                        | TF gene name, 96 h   |
|-----------------------------------------------------------------------------------|---------------------------------------------------------------------------------------------------------------------------|----------------------|
|                                                                                   | AHR<br>ARNT                                                                                                               | AHR<br>ARNT          |
| BACH1                                                                             | BACH1                                                                                                                     |                      |
|                                                                                   |                                                                                                                           | <u>HIC1</u><br>HIF1A |
|                                                                                   | HIF1A                                                                                                                     |                      |
|                                                                                   | <b>HSF2</b><br>ILF3                                                                                                       | <b>HSF2</b>          |
| ILF3                                                                              |                                                                                                                           |                      |
| MAFB<br>MAFG<br>MAFK                                                              | MAFB<br>MAFG<br>MAFK                                                                                                      |                      |
|                                                                                   |                                                                                                                           | MAZ                  |
| MEF2A<br>MEF2D                                                                    | MEF2A<br>MEF2D                                                                                                            |                      |
| <u>NFATC1</u><br>NFATC2<br>NFATC3<br>NFATC4<br>NFE2<br>NFE2L1<br>NFE2L2<br>NFE2L3 | <u>NFATC1</u><br>NFATC2<br>NFATC3<br>NFATC4<br>NFE2<br>NFE2L1<br>NFE2L2<br>NFE2L3<br>NFKB1<br>NFKB2<br>NKX2-5<br><br>RELA |                      |

---

|                                       |                                           |                                                                             |
|---------------------------------------|-------------------------------------------|-----------------------------------------------------------------------------|
|                                       | <u><b>RXRA</b></u><br>RXRB<br>SMAD3       |                                                                             |
| SMAD3                                 |                                           |                                                                             |
| <u>SREBF1</u><br>SREBF2<br><b>SRF</b> | <u>SREBF1</u><br>SREBF2<br><b>SRF</b>     | <b>SRF</b>                                                                  |
|                                       |                                           |                                                                             |
| <u>TCF3</u>                           |                                           | <u>TCF3</u><br>TFAP2C<br>TFCP2<br><u><b>VDR</b></u><br><u>WT1</u><br>ZBTB7A |
|                                       | <u><b>VDR</b></u><br><u>WT1</u><br>ZBTB7A | <u>ZBTB7B (c-Krox)</u>                                                      |

---

**Table S7.** Transcription factors (TFs) possibly regulating protein expression during ATRA-induced HL-60 cell differentiation at time points 3 h, 24 h, 48 h, and 96 h. Common TF that also may be regulators of differentially expressed transcripts are shown in bold. TFs demonstrating altered expression during ATRA induced differentiation of HL-60 cells are underlined.

| TF gene name, 3h | TF gene name, 24h | TF gene name, 48h   | TF gene name, 96h |
|------------------|-------------------|---------------------|-------------------|
| ARNT             | ARNT              |                     |                   |
| CUX1 (CDP)       | CUX1 (CDP)        |                     |                   |
|                  | <b>EP300</b>      |                     | <u>GATA2</u>      |
|                  | <u>HIC-1</u>      |                     |                   |
|                  | HSF1              | HSF1                |                   |
|                  |                   | <b>HSF2</b>         | <b>HSF2</b>       |
| <u>IRF7</u>      |                   | LMO2                |                   |
|                  |                   |                     | <b>MAX</b>        |
|                  | NFYC              | NFYC                | NFYC              |
| NKX31 (NKX3A)    |                   |                     | NKX31 (NKX3A)     |
| NR1H3            |                   |                     |                   |
| PBX3             | PBX3              | PBX3                |                   |
| POU2F1           | POU2F1            | POU2F1              |                   |
|                  | <b>PPARA</b>      | <b>PPARA</b>        |                   |
| RARA (NR1B1)     |                   |                     | RBPJ (RBPJK)      |
|                  |                   | RFXANK              |                   |
|                  |                   | <u>RUNX2 (AML3)</u> |                   |
| <u>RXRA</u>      | STAT1             | STAT1               | STAT1             |
|                  |                   | SRF                 |                   |
|                  | <u>VDR</u>        | <u>VDR</u>          | <u>VDR</u>        |
|                  | YY1               |                     |                   |
| ZNF384           |                   |                     |                   |

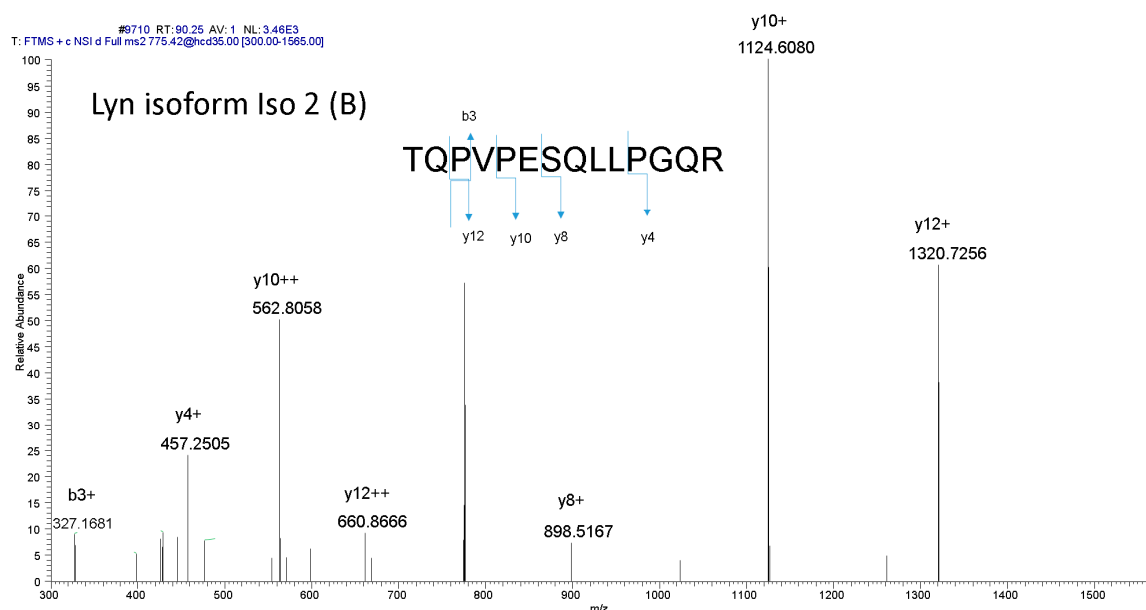

**Figure S5.** High-resolution annotated MS2 spectrum of LYN isoform B-specific peptide TQPVPESQLLPGR.

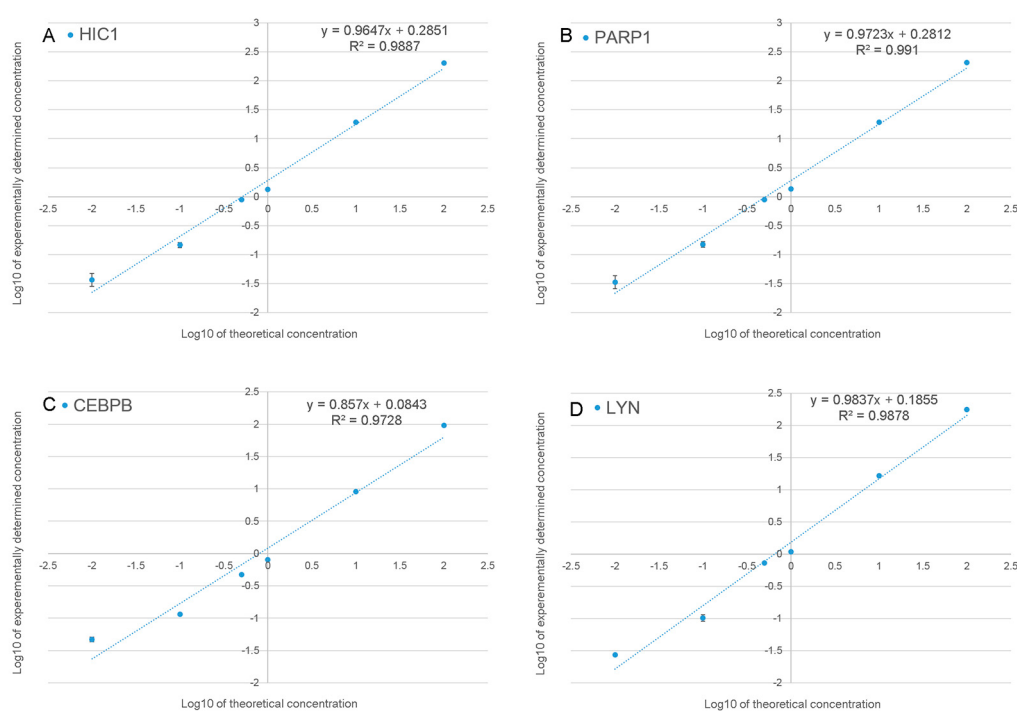

**Figure S6.** Calibration curves plotting of experimentally determined concentrations versus theoretical concentrations of the target analyte using isotopically labeled and label-free synthetic standard peptide (a) LEEAAPPSPDPR (HIC1), (b) TLGDFAAEYAK (PARP1), (c) VLELTAENER (CEBPB), and (d) TQPVPESQLLPGR (LYN). Isotopically labeled synthetic peptide was added to concentration of 12.5 fmol/ $\mu$ l into serial dilutions (0.01, 0.1, 0.5, 1, 10, 100 fmol/ $\mu$ l) of label-free synthetic peptide. Calibration curve is presented in Log10 scale.

**Table S8.** Transition for SRM method (QqQ TSQ Vantage (Thermo Scientific, USA), isotopically-labeled amino acid is shown in bold. +—singly-charged ion; ++—doubly-charged ion

| Peptide sequence       | Precursor ion m/z      | Fragment ion m/z                                                                                                            | Collision energy |
|------------------------|------------------------|-----------------------------------------------------------------------------------------------------------------------------|------------------|
| TLGDFAAEYAK            | 593.293 <sup>++</sup>  | 971.4469 <sup>+</sup><br>799.3985 <sup>+</sup><br>581.293 <sup>+</sup>                                                      | 20.7             |
| TLGDFAAEYAK (heavy)    | 597.3001 <sup>++</sup> | 979.4611 <sup>+</sup><br>807.4127 <sup>+</sup><br>589.3072 <sup>+</sup>                                                     |                  |
| LEEAAAPSDPFR           | 664.8277 <sup>++</sup> | 815.4046 <sup>+</sup><br>718.3519 <sup>+</sup><br>514.2508 <sup>+</sup>                                                     | 22.8             |
| LEEAAAPSDPFR (heavy)   | 666.8312 <sup>++</sup> | 819.4117 <sup>+</sup><br>722.359 <sup>+</sup><br>514.2508 <sup>+</sup>                                                      |                  |
| VLELTAENER             | 587.3091 <sup>++</sup> | 961.4585 <sup>+</sup><br>832.4159 <sup>+</sup><br>719.3319 <sup>+</sup>                                                     | 20.5             |
| VLELTAENER (heavy)     | 592.3133 <sup>++</sup> | 971.4668 <sup>+</sup><br>842.4242 <sup>+</sup><br>729.3401 <sup>+</sup>                                                     |                  |
| TQPVPESQLLPGQR         | 775.4203 <sup>++</sup> | 1320.7270 <sup>+</sup><br>1124.6058 <sup>+</sup><br>570.3358 <sup>+</sup>                                                   | 26.2             |
| TQPVPESQLLPGQR (heavy) | 778.9289 <sup>++</sup> | 457.2518 <sup>+</sup><br>1327.7442 <sup>+</sup><br>1131.6230 <sup>+</sup><br>577.3530 <sup>+</sup><br>457.2518 <sup>+</sup> | 26.2             |
