# Supplementary material for: Omics Technologies to Decipher Regulatory Networks in Granulocytic Cell Differentiation
Source: Biomolecules. 2021 Jun 18;11(6):907. doi: 10.3390/biom11060907 (PMC8233756; doi:10.3390/biom11060907)
Supplement: Supplementary file 1 [file biomolecules-11-00907-s001.zip › Table S1.xlsx]

## Sheet: Summary
The table contains Uniprot accession numbers, Gene symbols, Agilent probe ID, fold change, and description for DEGs and Ensembl ID, Gene symbols, Agilent probe ID, p-value, normalized and raw intensities for all transcripts detected.

## Sheet: DEGs at 3h
ID	Gene symbol	Agilent ID	Fold Change	Description
A0PK00	TMEM120B	A_24_P119131	0.457	Homo sapiens cDNA FLJ12567 fis, clone NT2RM4000855. [AK022629]
O00142	TK2	A_23_P351679	2.191	Homo sapiens thymidine kinase 2, mitochondrial (TK2), mRNA [NM_004614]
O00221	NFKBIE	A_23_P30655	2.116	Homo sapiens nuclear factor of kappa light polypeptide gene enhancer in B-cells inhibitor, epsilon (NFKBIE), mRNA [NM_004556]
O14746	TERT	A_23_P110851	0.471	Homo sapiens telomerase reverse transcriptase (TERT), transcript variant 1, mRNA [NM_003219]
O15446	CD3EAP	A_24_P267452	0.454	Homo sapiens CD3E antigen, epsilon polypeptide associated protein (CD3EAP), mRNA [NM_012099]
O43167	ZBTB24	A_24_P273716	0.474	Homo sapiens zinc finger and BTB domain containing 24 (ZBTB24), mRNA [NM_014797]
O60264	SMARCA5	A_32_P213678	2.557	Homo sapiens cDNA FLJ41445 fis, clone BRSTN2002105. [AK123439]
O60503	ADCY9	A_24_P935103	0.498	Homo sapiens adenylate cyclase 9 (ADCY9), mRNA [NM_001116]
O60739	EIF1B	A_23_P6891	2.137	Homo sapiens translation factor sui1 homolog (GC20), mRNA [NM_005875]
O75324	SNN	A_24_P30923	2.483	Homo sapiens stannin (SNN), mRNA [NM_003498]
O75955	FLOT1	A_23_P214603	6.364	Homo sapiens flotillin 1 (FLOT1), mRNA [NM_005803]
P00738	HP	A_23_P206760	4.191	Homo sapiens haptoglobin (HP), mRNA [NM_005143]
P00918	CA2	A_23_P8913	0.453	Homo sapiens carbonic anhydrase II (CA2), mRNA [NM_000067]
P01130	LDLR	A_24_P117029	0.442	Homo sapiens low density lipoprotein receptor (familial hypercholesterolemia) (LDLR), mRNA [NM_000527]
P01375	TNF	A_23_P376488	2.377	Homo sapiens tumor necrosis factor (TNF superfamily, member 2) (TNF), mRNA [NM_000594]
P02545	LMNA	A_23_P34835	2.131	Homo sapiens lamin A/C (LMNA), transcript variant 2, mRNA [NM_005572]
P02750	LRG1	A_23_P50638	3.129	Homo sapiens leucine-rich alpha-2-glycoprotein 1 (LRG1), mRNA [NM_052972]
P02795	MT2A	A_24_P361896	2.443	Homo sapiens metallothionein 2A (MT2A), mRNA [NM_005953]
P04732	MT1E	A_23_P206724	2.868	Homo sapiens metallothionein 1E (functional) (MT1E), mRNA [NM_175617]
P05120	SERPINB2	A_23_P153185	0.292	Homo sapiens serine (or cysteine) proteinase inhibitor, clade B (ovalbumin), member 2, mRNA (cDNA clone MGC:13616 IMAGE:4281085), complete cds. [BC012609]
P07438	MT1B	A_23_P37983	2.432	Homo sapiens metallothionein 1B (functional) (MT1B), mRNA [NM_005947]
P07550	ADRB2	A_23_P145024	0.477	Homo sapiens adrenergic, beta-2-, receptor, surface (ADRB2), mRNA [NM_000024]
P07948	LYN	A_23_P147431	2.109	Homo sapiens v-yes-1 Yamaguchi sarcoma viral related oncogene homolog (LYN), mRNA [NM_002350]
P08567	PLEK	A_23_P209678	2.021	Homo sapiens pleckstrin (PLEK), mRNA [NM_002664]
P09467	FBP1	A_23_P257111	2.26	Homo sapiens fructose-1,6-bisphosphatase 1 (FBP1), mRNA [NM_000507]
P09769	FGR	A_23_P103932	12.94	Homo sapiens Gardner-Rasheed feline sarcoma viral (v-fgr) oncogene homolog (FGR), mRNA [NM_005248]
P10145	CXCL8	A_32_P87013	4.091	Homo sapiens interleukin 8 (IL8), mRNA [NM_000584]
P10914	IRF1	A_23_P41765	2.004	Homo sapiens interferon regulatory factor 1 (IRF1), mRNA [NM_002198]
P11309	PIM1	A_23_P345118	2.246	Homo sapiens pim-1 oncogene (PIM1), mRNA [NM_002648]
P13236	CCL4	A_23_P207564	15.77	Homo sapiens chemokine (C-C motif) ligand 4 (CCL4), mRNA [NM_002984]
P13500	CCL2	A_23_P89431	62.48	Homo sapiens chemokine (C-C motif) ligand 2 (CCL2), mRNA [NM_002982]
P13640	MT1G	A_23_P60933	2.562	Homo sapiens metallothionein 1G (MT1G), mRNA [NM_005950]
P13725	OSM	A_23_P166408	5.506	Homo sapiens oncostatin M (OSM), mRNA [NM_020530]
P14598	NCF1	A_32_P116203	9.014	Homo sapiens neutrophil cytosolic factor 1 (47kDa, chronic granulomatous disease, autosomal 1) (NCF1), mRNA [NM_000265]
P16619	CCL3L3	A_24_P228130	2.412	Homo sapiens chemokine (C-C motif) ligand 3-like 3 (CCL3L3), mRNA [NM_001001437]
P17081	RHOQ	A_32_P70273	2.017	Homo sapiens ras homolog gene family, member Q (RHOQ), mRNA [NM_012249]
P17676	CEBPB	A_23_P411296	3.613	Homo sapiens CCAAT/enhancer binding protein (C/EBP), beta (CEBPB), mRNA [NM_005194]
P19484	TFEB	A_23_P368729	2.907	Homo sapiens transcription factor EB (TFEB), mRNA [NM_007162]
P20749	BCL3	A_23_P4662	11.65	Homo sapiens B-cell CLL/lymphoma 3 (BCL3), mRNA [NM_005178]
P22732	SLC2A5	A_23_P160159	2.595	Homo sapiens solute carrier family 2 (facilitated glucose/fructose transporter), member 5 (SLC2A5), mRNA [NM_003039]
P24468	NR2F2	A_23_P88589	0.472	Homo sapiens nuclear receptor subfamily 2, group F, member 2 (NR2F2), mRNA [NM_021005]
P25105	PTAFR	A_23_P51926	2.422	Homo sapiens platelet-activating factor receptor (PTAFR), mRNA [NM_000952]
P25686	DNAJB2	A_24_P102981	2.044	Homo sapiens DnaJ (Hsp40) homolog, subfamily B, member 2 (DNAJB2), mRNA [NM_006736]
P25963	NFKBIA	A_23_P106002	2.875	Homo sapiens nuclear factor of kappa light polypeptide gene enhancer in B-cells inhibitor, alpha (NFKBIA), mRNA [NM_020529]
P27918	CFP	A_23_P22444	3.412	Homo sapiens properdin P factor, complement (PFC), mRNA [NM_002621]
P28907	CD38	A_23_P167328	4.911	Homo sapiens CD38 antigen (p45) (CD38), mRNA [NM_001775]
P29274	ADORA2A, SPECC1L-ADORA2A	A_23_P109436	2.04	Homo sapiens adenosine A2a receptor (ADORA2A), mRNA [NM_000675]
P31629	HIVEP2	A_23_P214766	2.728	Homo sapiens human immunodeficiency virus type I enhancer binding protein 2 (HIVEP2), mRNA [NM_006734]
P32246	CCR1	A_24_P148717	3.827	Homo sapiens chemokine (C-C motif) receptor 1 (CCR1), mRNA [NM_001295]
P32248	CCR7	A_23_P343398	3.729	Homo sapiens chemokine (C-C motif) receptor 7 (CCR7), mRNA [NM_001838]
P34972	CNR2	A_32_P48054	2.055	Q8N329 (Q8N329) MGC34132 protein, partial (12%) [THC2284172]
P35219	CA8	A_23_P83838	0.483	Homo sapiens carbonic anhydrase VIII (CA8), mRNA [NM_004056]
P35638	DDIT3	A_23_P21134	2.563	Homo sapiens DNA-damage-inducible transcript 3 (DDIT3), mRNA [NM_004083]
P41134	ID1	A_23_P252306	23.09	Homo sapiens inhibitor of DNA binding 1, dominant negative helix-loop-helix protein (ID1), transcript variant 1, mRNA [NM_002165]
P41182	BCL6	A_23_P57856	2.495	Homo sapiens B-cell CLL/lymphoma 6 (zinc finger protein 51) (BCL6), transcript variant 2, mRNA [NM_138931]
P41597	CCR2	A_23_P212354	5.081	Homo sapiens chemokine (C-C motif) receptor 2 (CCR2), transcript variant A, mRNA [NM_000647]
P43116	PTGER2	A_23_P151710	0.394	Homo sapiens prostaglandin E receptor 2 (subtype EP2), 53kDa (PTGER2), mRNA [NM_000956]
P46695	IER3	A_23_P42257	4.984	Homo sapiens immediate early response 3 (IER3), transcript variant short, mRNA [NM_003897]
P47712	PLA2G4A	A_23_P11685	0.48	Homo sapiens phospholipase A2, group IVA (cytosolic, calcium-dependent) (PLA2G4A), mRNA [NM_024420]
P49682	CXCR3	A_23_P114299	2.273	Homo sapiens chemokine (C-X-C motif) receptor 3 (CXCR3), mRNA [NM_001504]
P50238	AL928654.7, CRIP1	A_23_P44674	2.023	Homo sapiens cysteine-rich protein 1 (intestinal) (CRIP1), mRNA [NM_001311]
P51681	CCR5	A_23_P412321	3.38	Homo sapiens chemokine (C-C motif) receptor 5 (CCR5), mRNA [NM_000579]
P55211	CASP9	A_24_P111342	2.044	Homo sapiens caspase 9, apoptosis-related cysteine protease (CASP9), transcript variant alpha, mRNA [NM_001229]
P55273	CDKN2D	A_23_P89941	2.437	Homo sapiens cyclin-dependent kinase inhibitor 2D (p19, inhibits CDK4) (CDKN2D), transcript variant 1, mRNA [NM_001800]
P56559	ARL4C	A_23_P317620	0.448	Homo sapiens ADP-ribosylation factor-like 7 (ARL7), mRNA [NM_005737]
P59768	GNG2	A_32_P208403	9.873	Homo sapiens guanine nucleotide binding protein (G protein), gamma 2 (GNG2), mRNA [NM_053064]
P78324	SIRPA	A_23_P210708	2.12	Homo sapiens protein tyrosine phosphatase, non-receptor type substrate 1 (PTPNS1), mRNA [NM_080792]
P78543	BTG2	A_23_P62901	2.889	Homo sapiens BTG family, member 2 (BTG2), mRNA [NM_006763]
P80297	MT1X	A_23_P303242, A_24_P125096	2.6155	Homo sapiens metallothionein 1X (MT1X), mRNA [NM_005952]
Q01151	CD83	A_23_P70670	2.488	Homo sapiens CD83 antigen (activated B lymphocytes, immunoglobulin superfamily) (CD83), mRNA [NM_004233]
Q01201	RELB	A_23_P55706	7.233	Homo sapiens v-rel reticuloendotheliosis viral oncogene homolog B, nuclear factor of kappa light polypeptide gene enhancer in B-cells 3 (avian) (RELB), mRNA [NM_006509]
Q01581	HMGCS1	A_24_P63522	0.488	Homo sapiens 3-hydroxy-3-methylglutaryl-Coenzyme A synthase 1 (soluble) (HMGCS1), mRNA [NM_002130]
Q03169	TNFAIP2	A_23_P421423	11	Homo sapiens tumor necrosis factor, alpha-induced protein 2 (TNFAIP2), mRNA [NM_006291]
Q06643	LTB	A_23_P93348	7.942	Homo sapiens lymphotoxin beta (TNF superfamily, member 3) (LTB), transcript variant 1, mRNA [NM_002341]
Q09666	AHNAK	A_24_P943393	2.171	Homo sapiens AHNAK nucleoprotein (desmoyokin) (AHNAK), transcript variant 1, mRNA [NM_001620]
Q12809	KCNH2	A_23_P168403	0.353	Homo sapiens potassium voltage-gated channel, subfamily H (eag-related), member 2 (KCNH2), transcript variant 1, mRNA [NM_000238]
Q12948	FOXC1	A_23_P390504	2.854	Homo sapiens forkhead box C1 (FOXC1), mRNA [NM_001453]
Q13203	MYBPH	A_23_P148737	13.15	Homo sapiens myosin binding protein H (MYBPH), mRNA [NM_004997]
Q13239	SLA	A_23_P216340	2.935	Homo sapiens Src-like-adaptor (SLA), mRNA [NM_006748]
Q13393	PLD1	A_23_P155335	0.439	Homo sapiens phospholipase D1, phophatidylcholine-specific (PLD1), mRNA [NM_002662]
Q13489	BIRC3	A_23_P98350	7.884	Homo sapiens baculoviral IAP repeat-containing 3 (BIRC3), transcript variant 1, mRNA [NM_001165]
Q14469	HES1	A_23_P17998	6.36	Homo sapiens hairy and enhancer of split 1, (Drosophila) (HES1), mRNA [NM_005524]
Q14526	HIC1	A_23_P129856	6.432	Q9V9M3 (Q9V9M3) CG16937-PA, partial (6%) [THC2375716]
Q14534	SQLE	A_23_P146284	0.463	Homo sapiens squalene epoxidase (SQLE), mRNA [NM_003129]
Q14678	KANK1	A_23_P500130, A_32_P64570	0.344	Homo sapiens ankyrin repeat domain 15 (ANKRD15), transcript variant 2, mRNA [NM_153186]
Q16548	BCL2A1	A_23_P152002	3.295	Homo sapiens BCL2-related protein A1 (BCL2A1), mRNA [NM_004049]
Q16589	CCNG2	A_23_P110122	2.245	Homo sapiens cyclin G2 (CCNG2), mRNA [NM_004354]
Q16623	STX1A	A_23_P82420	2.07	Homo sapiens syntaxin 1A (brain) (STX1A), mRNA [NM_004603]
Q16822	PCK2	A_23_P140207	2.001	Homo sapiens phosphoenolpyruvate carboxykinase 2 (mitochondrial) (PCK2), nuclear gene encoding mitochondrial protein, transcript variant 1, mRNA [NM_004563]
Q1EHB4	SLC5A12	A_23_P323943	0.348	Homo sapiens solute carrier family 5 (sodium/glucose cotransporter), member 12 (SLC5A12), mRNA [NM_178498]
Q3KP44	ANKRD55	A_23_P258483	0.471	Homo sapiens hypothetical protein FLJ11795 (FLJ11795), mRNA [NM_024669]
Q3KP66	C1orf106	A_23_P1043	3.32	Homo sapiens chromosome 1 open reading frame 106 (C1orf106), mRNA [NM_018265]
Q53GL0	PLEKHO1	A_23_P35114	2.717	Homo sapiens CK2 interacting protein 1; HQ0024c protein (CKIP-1), mRNA [NM_016274]
Q5D1E8	ZC3H12A	A_23_P326160	2.366	Homo sapiens zinc finger CCCH-type containing 12A (ZC3H12A), mRNA [NM_025079]
Q5M775	SPECC1	A_23_P38567	2.553	Homo sapiens spectrin domain with coiled-coils 1 (SPECC1), mRNA [NM_152904]
Q5T1R4	HIVEP3	A_32_P59302	2.387	Homo sapiens cDNA clone IMAGE:6254031. [BC080552]
Q5T2D2	TREML2	A_23_P7932	3.301	Homo sapiens triggering receptor expressed on myeloid cells-like 2 (TREML2), mRNA [NM_024807]
Q5T953	IER5L	A_24_P383450	2.346	Homo sapiens immediate early response 5-like (IER5L), mRNA [NM_203434]
Q5TCX8	RP5-862P8.2	A_24_P130952	0.484	Homo sapiens mixed lineage kinase 4 (KIAA1804), mRNA [NM_032435]
Q6JBY9	RCSD1	A_23_P23279	3.599	Homo sapiens RCSD domain containing 1 (RCSD1), mRNA [NM_052862]
Q7RTY1	SLC16A9	A_23_P115726	2.392	Homo sapiens solute carrier family 16 (monocarboxylic acid transporters), member 9 (SLC16A9), mRNA [NM_194298]
Q7Z3S7	CACNA2D4	A_23_P353014	3.124	Homo sapiens calcium channel, voltage-dependent, alpha 2/delta subunit 4 (CACNA2D4), transcript variant 1, mRNA [NM_172364]
Q7Z7M8	B3GNT8	A_23_P101380	2.806	Homo sapiens UDP-Gal:betaGal beta 1,3-galactosyltransferase polypeptide 7 (B3GALT7), mRNA [NM_198540]
Q86VE9	SERINC5	A_24_P6381	0.471	Homo sapiens chromosome 5 open reading frame 12 (C5orf12), mRNA [NM_178276]
Q8IV20	LACC1	A_23_P374315	2.158	Homo sapiens hypothetical protein FLJ38725 (FLJ38725), mRNA [NM_153218]
Q8IW52	SLITRK4	A_32_P131640	0.495	Homo sapiens SLIT and NTRK-like family, member 4 (SLITRK4), mRNA [NM_173078]
Q8IWU5	SULF2	A_23_P154605	3.44	Homo sapiens sulfatase 2 (SULF2), transcript variant 1, mRNA [NM_018837]
Q8IWW6	ARHGAP12	A_23_P149775	4.644	Homo sapiens Rho GTPase activating protein 12 (ARHGAP12), mRNA [NM_018287]
Q8IX19	MCEMP1	A_23_P330561	2.513	Homo sapiens hypothetical protein LOC199675 (LOC199675), mRNA [NM_174918]
Q8IZF4	ADGRG5	A_23_P206290, A_23_P206293	2.4705	Homo sapiens G protein-coupled receptor 114 (GPR114), mRNA [NM_153837]
Q8N2A8	PLD6	A_23_P360626	0.358	Homo sapiens similar to CG12314 gene product (LOC201164), mRNA [NM_178836]
Q8N370	SLC43A2	A_24_P296508	2.606	Homo sapiens solute carrier family 43, member 2 (SLC43A2), mRNA [NM_152346]
Q8N9Z2	CCDC71L	A_32_P170736	2.635	Homo sapiens cDNA FLJ25556 fis, clone JTH02629. [AK098422]
Q8NES3	LFNG	A_23_P8452	6.526	Homo sapiens lunatic fringe homolog (Drosophila) (LFNG), mRNA [NM_002304]
Q8TCE6	FAM45A	A_24_P98555	0.445	Homo sapiens family with sequence similarity 45, member B (FAM45B), mRNA [NM_018472]
Q8TD55	PLEKHO2	A_23_P129246	2.549	Homo sapiens PH domain-containing protein (pp9099), mRNA [NM_025201]
Q8TDQ1	CD300LF	A_23_P55020	2.26	Homo sapiens CD300 antigen like family member F (CD300LF), mRNA [NM_139018]
Q8WVV9	HNRNPLL	A_24_P225635	3.925	Q8IX05 (Q8IX05) C-type lectin BIMLEC precursor (Type I transmembrane C-type lectin receptor DCL-1), partial (6%) [THC2403280]
Q92563	SPOCK2	A_23_P161280	2.374	Homo sapiens sparc/osteonectin, cwcv and kazal-like domains proteoglycan (testican) 2 (SPOCK2), mRNA [NM_014767]
Q92870	APBB2	A_23_P10701	0.338	Homo sapiens amyloid beta (A4) precursor protein-binding, family B, member 2 (Fe65-like) (APBB2), mRNA [NM_173075]
Q92982	NINJ1	A_23_P169137	2.784	Homo sapiens ninjurin 1 (NINJ1), mRNA [NM_004148]
Q96AV8	E2F7	A_32_P210202	2.064	Homo sapiens E2F transcription factor 7 (E2F7), mRNA [NM_203394]
Q96AX2	RAB37	A_23_P414654	2.492	Homo sapiens RAB37, member RAS oncogene family (RAB37), mRNA [NM_175738]
Q96B67	ARRDC3	A_24_P274615	3.39	Homo sapiens arrestin domain containing 3 (ARRDC3), mRNA [NM_020801]
Q96C23	GALM	A_23_P67971	2.088	Homo sapiens galactose mutarotase (aldose 1-epimerase) (GALM), mRNA [NM_138801]
Q96F45	ZNF503	A_23_P202484	2.318	Homo sapiens zinc finger protein 503 (ZNF503), mRNA [NM_032772]
Q96GA7	SDSL	A_23_P53439	2.125	Homo sapiens serine dehydratase-like (SDSL), mRNA [NM_138432]
Q96Q27	ASB2	A_23_P205370	5.911	Homo sapiens ankyrin repeat and SOCS box-containing 2 (ASB2), mRNA [NM_016150]
Q96T66	NMNAT3	A_24_P260134	0.457	Homo sapiens nicotinamide nucleotide adenylyltransferase 3 (NMNAT3), mRNA [NM_178177]
Q9BXA5	SUCNR1	A_23_P69171	3.234	Homo sapiens succinate receptor 1 (SUCNR1), mRNA [NM_033050]
Q9BXH1	BBC3	A_23_P382775	2.085	Homo sapiens BCL2 binding component 3 (BBC3), mRNA [NM_014417]
Q9C0C4	SEMA4C	A_23_P114057	2.494	Homo sapiens sema domain, immunoglobulin domain (Ig), transmembrane domain (TM) and short cytoplasmic domain, (semaphorin) 4C (SEMA4C), mRNA [NM_017789]
Q9H2X6	HIPK2	A_23_P169756, A_23_P169766, A_24_P500621	2.71833	Homo sapiens cDNA FLJ23711 fis, clone HEP12371. [AK074291],Homo sapiens homeodomain interacting protein kinase 2 (HIPK2), mRNA [NM_022740]
Q9H4W6	EBF3	A_23_P391396	0.439	Homo sapiens early B-cell factor 3 (EBF3), mRNA [NM_001005463]
Q9H7M9	C10orf54	A_23_P24077	2.524	Homo sapiens chromosome 10 open reading frame 54 (C10orf54), mRNA [NM_022153]
Q9H9V4	RNF122	A_23_P134744	2.029	Homo sapiens ring finger protein 122 (RNF122), mRNA [NM_024787]
Q9HA72	CALHM2	A_23_P202219	3.705	Homo sapiens family with sequence similarity 26, member B (FAM26B), mRNA [NM_015916]
Q9HBF5	ST20	A_23_P321703	6.125	Homo sapiens cervical cancer suppressor 1
Q9HC23	PROK2	A_24_P97342	0.422	Homo sapiens prokineticin 2 (PROK2), mRNA [NM_021935]
Q9HC97	GPR35	A_23_P154245	4.462	Homo sapiens G protein-coupled receptor 35 (GPR35), mRNA [NM_005301]
Q9NPF7	IL23A	A_23_P76078	2.25	Homo sapiens interleukin 23, alpha subunit p19 (IL23A), mRNA [NM_016584]
Q9NPI7	KRCC1	A_23_P56759	3.243	Homo sapiens hypothetical protein LOC51315 (LOC51315), mRNA [NM_016618]
Q9NPP4	NLRC4	A_23_P119835	2.471	Homo sapiens caspase recruitment domain family, member 12 (CARD12), mRNA [NM_021209]
Q9NQ84	GPRC5C	A_23_P38167	2.062	Homo sapiens G protein-coupled receptor, family C, group 5, member C (GPRC5C), transcript variant 1, mRNA [NM_022036]
Q9NRI5	DISC1	A_23_P62967	0.481	Homo sapiens disrupted in schizophrenia 1 (DISC1), transcript variant L, mRNA [NM_018662]
Q9NS28	RGS18	A_23_P302550	0.463	Homo sapiens regulator of G-protein signalling 18 (RGS18), mRNA [NM_130782]
Q9NWM0	SMOX	A_23_P102731	4.187	Homo sapiens spermine oxidase (SMOX), transcript variant 1, mRNA [NM_175839]
Q9NX09	DDIT4	A_23_P104318	5.602	Homo sapiens DNA-damage-inducible transcript 4 (DDIT4), mRNA [NM_019058]
Q9NXW2	DNAJB12	A_24_P244096, A_24_P244100	2.3425	Homo sapiens DnaJ (Hsp40) homolog, subfamily B, member 12 (DNAJB12), transcript variant 1, mRNA [NM_001002762]
Q9NZW5	MPP6	A_23_P71053	0.48	Homo sapiens membrane protein, palmitoylated 6 (MAGUK p55 subfamily member 6) (MPP6), mRNA [NM_016447]
Q9P2A4	ABI3	A_23_P141429	2.826	Homo sapiens ABI gene family, member 3 (ABI3), mRNA [NM_016428]
Q9UBU3	GHRL	A_23_P40956	2.315	Homo sapiens ghrelin precursor (GHRL), mRNA [NM_016362]
Q9UGN4	CD300A	A_24_P159434	6.656	Homo sapiens CD300A antigen (CD300A), mRNA [NM_007261]
Q9UIA0	CYTH4	A_23_P155057	2.053	Homo sapiens pleckstrin homology, Sec7 and coiled-coil domains 4 (PSCD4), mRNA [NM_013385]
Q9ULF5	SLC39A10	A_23_P119778	0.458	Homo sapiens solute carrier family 39 (zinc transporter), member 10 (SLC39A10), mRNA [NM_020342]
Q9UPY5	SLC7A11	A_32_P165477	5.315	Homo sapiens solute carrier family 7, (cationic amino acid transporter, y+ system) member 11, mRNA (cDNA clone IMAGE:5300264), partial cds. [BC041925]
Q9UQQ2	SH2B3	A_24_P201739	2.597	Homo sapiens lymphocyte adaptor protein (LNK), mRNA [NM_005475]
Q9Y4A8	NFE2L3	A_23_P42718	0.447	Homo sapiens nuclear factor (erythroid-derived 2)-like 3 (NFE2L3), mRNA [NM_004289]
Q9Y6M7	SLC4A7	A_24_P368575	0.475	Homo sapiens solute carrier family 4, sodium bicarbonate cotransporter, member 7 (SLC4A7), mRNA [NM_003615]

## Sheet: DEGs at 24h
ID	Gene symbol	Agilent ID	Fold Change	Description
A6NC98	CCDC88B	A_23_P24384	3.291	Homo sapiens hypothetical protein FLJ37970 (FLJ37970), mRNA [NM_032251]
A8K4G0	CD300LB	A_23_P15369	3.09	Homo sapiens CD300 antigen like family member B (CD300LB), mRNA [NM_174892]
O14802	POLR3A	A_24_P85283	0.498	Homo sapiens polymerase (RNA) III (DNA directed) polypeptide A, 155kDa (POLR3A), mRNA [NM_007055]
O15492	RGS16	A_23_P217845	0.437	Homo sapiens regulator of G-protein signalling 16 (RGS16), mRNA [NM_002928]
O15524	SOCS1	A_23_P420196	3.577	Homo sapiens suppressor of cytokine signaling 1 (SOCS1), mRNA [NM_003745]
O43167	ZBTB24	A_24_P273716	0.46	Homo sapiens zinc finger and BTB domain containing 24 (ZBTB24), mRNA [NM_014797]
O43286	B4GALT5	A_24_P239731, A_24_P365469	2.3695	Homo sapiens UDP-Gal:betaGlcNAc beta 1,4- galactosyltransferase, polypeptide 5 (B4GALT5), mRNA [NM_004776]
O60290	ZNF862	A_24_P333421	2.377	Homo sapiens mRNA for KIAA0543 protein, partial cds. [AB011115]
O60739	EIF1B	A_23_P6891	2.223	Homo sapiens translation factor sui1 homolog (GC20), mRNA [NM_005875]
O75264	SMIM24	A_23_P397120	2.12	Homo sapiens HSPC323 mRNA, partial cds. [AF161441]
O75324	SNN	A_24_P30923	2.909	Homo sapiens stannin (SNN), mRNA [NM_003498]
O75955	FLOT1	A_23_P214603	3.998	Homo sapiens flotillin 1 (FLOT1), mRNA [NM_005803]
O75995	SASH3	A_24_P237443	2.078	Homo sapiens chromosome X open reading frame 9 (CXorf9), mRNA [NM_018990]
O94851	MICAL2	A_23_P24843	0.208	Homo sapiens microtubule associated monoxygenase, calponin and LIM domain containing 2 (MICAL2), mRNA [NM_014632]
O95786	DDX58	A_23_P20814	2.163	Homo sapiens DEAD (Asp-Glu-Ala-Asp) box polypeptide 58 (DDX58), mRNA [NM_014314]
P00738	HP	A_23_P206760	2.061	Homo sapiens haptoglobin (HP), mRNA [NM_005143]
P00918	CA2	A_23_P8913	0.316	Homo sapiens carbonic anhydrase II (CA2), mRNA [NM_000067]
P00966	ASS1	A_23_P31921	0.458	Homo sapiens argininosuccinate synthetase (ASS), transcript variant 2, mRNA [NM_054012]
P01106	MYC	A_23_P215956	0.399	Homo sapiens v-myc myelocytomatosis viral oncogene homolog (avian) (MYC), mRNA [NM_002467]
P01584	IL1B	A_23_P79518	0.323	Homo sapiens interleukin 1, beta (IL1B), mRNA [NM_000576]
P02750	LRG1	A_23_P50638	4.264	Homo sapiens leucine-rich alpha-2-glycoprotein 1 (LRG1), mRNA [NM_052972]
P02786	TFRC	A_23_P212617	0.324	Homo sapiens transferrin receptor (p90, CD71) (TFRC), mRNA [NM_003234]
P04839	CYBB	A_23_P217258, A_24_P365767	4.5495	Homo sapiens cytochrome b-245, beta polypeptide (chronic granulomatous disease) (CYBB), mRNA [NM_000397]
P05107	ITGB2	A_23_P329573	2.847	Homo sapiens integrin, beta 2 (antigen CD18 (p95), lymphocyte function-associated antigen 1; macrophage antigen 1 (mac-1) beta subunit) (ITGB2), mRNA [NM_000211]
P05109	S100A8	A_23_P434809	2.426	Homo sapiens S100 calcium binding protein A8 (calgranulin A) (S100A8), mRNA [NM_002964]
P05120	SERPINB2	A_23_P153185	0.261	Homo sapiens serine (or cysteine) proteinase inhibitor, clade B (ovalbumin), member 2, mRNA (cDNA clone MGC:13616 IMAGE:4281085), complete cds. [BC012609]
P05412	JUN	A_23_P201538	0.282	Homo sapiens v-jun sarcoma virus 17 oncogene homolog (avian) (JUN), mRNA [NM_002228]
P08243	ASNS	A_23_P145694	0.455	Homo sapiens asparagine synthetase (ASNS), transcript variant 2, mRNA [NM_001673]
P08311	CTSG	A_23_P140384	0.497	Homo sapiens cathepsin G (CTSG), mRNA [NM_001911]
P08567	PLEK	A_23_P209678	2.812	Homo sapiens pleckstrin (PLEK), mRNA [NM_002664]
P08575		A_23_P125451	2.248	Homo sapiens protein tyrosine phosphatase, receptor type, C (PTPRC), transcript variant 1, mRNA [NM_002838]
P08631	HCK	A_24_P365526	2.78	Homo sapiens hemopoietic cell kinase (HCK), mRNA [NM_002110]
P08670	VIM	A_23_P161194	0.275	Homo sapiens vimentin (VIM), mRNA [NM_003380]
P08887	IL6R	A_24_P379413	0.41	Homo sapiens interleukin 6 receptor (IL6R), transcript variant 1, mRNA [NM_000565]
P09382	LGALS1	A_23_P166459	2.511	Homo sapiens lectin, galactoside-binding, soluble, 1 (galectin 1) (LGALS1), mRNA [NM_002305]
P09467	FBP1	A_23_P257111	5.958	Homo sapiens fructose-1,6-bisphosphatase 1 (FBP1), mRNA [NM_000507]
P09769	FGR	A_23_P103932	28.04	Homo sapiens Gardner-Rasheed feline sarcoma viral (v-fgr) oncogene homolog (FGR), mRNA [NM_005248]
P09917	ALOX5	A_23_P104464	2.686	Homo sapiens arachidonate 5-lipoxygenase (ALOX5), mRNA [NM_000698]
P10145	CXCL8	A_32_P87013	2.165	Homo sapiens interleukin 8 (IL8), mRNA [NM_000584]
P10275	AR	A_23_P113111	0.251	Homo sapiens androgen receptor (dihydrotestosterone receptor; testicular feminization; spinal and bulbar muscular atrophy; Kennedy disease) (AR), transcript variant 1, mRNA [NM_000044]
P10415	BCL2	A_23_P352266	0.465	Homo sapiens B-cell CLL/lymphoma 2 (BCL2), nuclear gene encoding mitochondrial protein, transcript variant alpha, mRNA [NM_000633]
P11309	PIM1	A_23_P345118	3.551	Homo sapiens pim-1 oncogene (PIM1), mRNA [NM_002648]
P13500	CCL2	A_23_P89431	37.61	Homo sapiens chemokine (C-C motif) ligand 2 (CCL2), mRNA [NM_002982]
P13501	CCL5	A_23_P152838	3.307	Homo sapiens chemokine (C-C motif) ligand 5 (CCL5), mRNA [NM_002985]
P13686	ACP5	A_23_P142075	5.861	Homo sapiens acid phosphatase 5, tartrate resistant (ACP5), mRNA [NM_001611]
P13725	OSM	A_23_P166408	0.401	Homo sapiens oncostatin M (OSM), mRNA [NM_020530]
P13727	PRG2	A_23_P218002	0.212	Homo sapiens proteoglycan 2, bone marrow (natural killer cell activator, eosinophil granule major basic protein) (PRG2), mRNA [NM_002728]
P13928	ANXA8	A_32_P105549	0.359	Homo sapiens annexin A8 (ANXA8), mRNA [NM_001630]
P14598	NCF1	A_32_P116203	19.61	Homo sapiens neutrophil cytosolic factor 1 (47kDa, chronic granulomatous disease, autosomal 1) (NCF1), mRNA [NM_000265]
P15311	EZR	A_24_P290481	0.435	Homo sapiens villin 2 (ezrin) (VIL2), mRNA [NM_003379]
P15408	FOSL2	A_23_P343671	0.422	Homo sapiens mRNA; cDNA DKFZp686E0486 (from clone DKFZp686E0486). [BX647822]
P15814	IGLL1	A_23_P120812	0.494	Homo sapiens immunoglobulin lambda-like polypeptide 1 (IGLL1), transcript variant 1, mRNA [NM_020070]
P16035	TIMP2	A_23_P107401	2.261	Homo sapiens tissue inhibitor of metalloproteinase 2 (TIMP2), mRNA [NM_003255]
P16435	POR	A_24_P29723	2.482	Homo sapiens P450 (cytochrome) oxidoreductase (POR), mRNA [NM_000941]
P17676	CEBPB	A_23_P143242, A_23_P411296	3.2335	Homo sapiens CCAAT/enhancer binding protein (C/EBP), beta (CEBPB), mRNA [NM_005194]
P19397	CD53	A_23_P74547	2.135	Homo sapiens CD53 antigen (CD53), mRNA [NM_000560]
P19484	TFEB	A_23_P368729	3.855	Homo sapiens transcription factor EB (TFEB), mRNA [NM_007162]
P19544	WT1	A_23_P116280	0.333	Homo sapiens Wilms tumor 1 (WT1), transcript variant B, mRNA [NM_024424]
P20292	ALOX5AP	A_23_P2793, A_24_P347378	5.208	Homo sapiens arachidonate 5-lipoxygenase-activating protein (ALOX5AP), mRNA [NM_001629]
P20749	BCL3	A_23_P4662	2.628	Homo sapiens B-cell CLL/lymphoma 3 (BCL3), mRNA [NM_005178]
P21673	SAT1	A_23_P137016, A_23_P378722	2.8575	Homo sapiens spermidine/spermine N1-acetyltransferase (SAT), mRNA [NM_002970]
P22466	GAL	A_23_P374844	0.5	Homo sapiens galanin (GAL), mRNA [NM_015973]
P22732	SLC2A5	A_23_P160159	6.78	Homo sapiens solute carrier family 2 (facilitated glucose/fructose transporter), member 5 (SLC2A5), mRNA [NM_003039]
P23219	PTGS1	A_23_P216966, A_24_P64167	2.655	Homo sapiens prostaglandin-endoperoxide synthase 1 (prostaglandin G/H synthase and cyclooxygenase) (PTGS1), transcript variant 1, mRNA [NM_000962]
P23634	ATP2B4	A_24_P405205	2.142	Homo sapiens ATPase, Ca++ transporting, plasma membrane 4 (ATP2B4), transcript variant 1, mRNA [NM_001001396]
P23769	GATA2	A_23_P110022	0.277	Homo sapiens GATA binding protein 2 (GATA2), mRNA [NM_032638]
P25686	DNAJB2	A_24_P102981	2.794	Homo sapiens DnaJ (Hsp40) homolog, subfamily B, member 2 (DNAJB2), mRNA [NM_006736]
P26010	ITGB7	A_23_P76529	6.25	Homo sapiens integrin, beta 7 (ITGB7), mRNA [NM_000889]
P27918	CFP	A_23_P22444	6.862	Homo sapiens properdin P factor, complement (PFC), mRNA [NM_002621]
P28799	GRN	A_23_P49708	2.821	Homo sapiens granulin (GRN), transcript variant 1, mRNA [NM_002087]
P28907	CD38	A_23_P167328	24.59	Homo sapiens CD38 antigen (p45) (CD38), mRNA [NM_001775]
P30740	SERPINB1	A_23_P214330, A_24_P269315	4.2065	Homo sapiens serine (or cysteine) proteinase inhibitor, clade B (ovalbumin), member 1 (SERPINB1), mRNA [NM_030666]
P31358	CD52	A_23_P85800	4.93	Homo sapiens CD52 antigen (CAMPATH-1 antigen) (CD52), mRNA [NM_001803]
P31629	HIVEP2	A_23_P214766	2.171	Homo sapiens human immunodeficiency virus type I enhancer binding protein 2 (HIVEP2), mRNA [NM_006734]
P32246	CCR1	A_24_P148717	7.058	Homo sapiens chemokine (C-C motif) receptor 1 (CCR1), mRNA [NM_001295]
P33241	LSP1	A_23_P13382	5.325	Homo sapiens lymphocyte-specific protein 1 (LSP1), transcript variant 3, mRNA [NM_001013254]
P36222	CHI3L1	A_23_P137665	3.316	Homo sapiens chitinase 3-like 1 (cartilage glycoprotein-39) (CHI3L1), mRNA [NM_001276]
P36956	SREBF1	A_23_P129786	2.553	Homo sapiens sterol regulatory element binding transcription factor 1 (SREBF1), transcript variant 1, mRNA [NM_001005291]
P40121	CAPG	A_23_P165636	3.199	Homo sapiens capping protein (actin filament), gelsolin-like (CAPG), mRNA [NM_001747]
P41134	ID1	A_23_P252306	2.646	Homo sapiens inhibitor of DNA binding 1, dominant negative helix-loop-helix protein (ID1), transcript variant 1, mRNA [NM_002165]
P41226	UBA7	A_23_P21207	2.21	Homo sapiens ubiquitin-activating enzyme E1-like (UBE1L), mRNA [NM_003335]
P41597	CCR2	A_23_P212354	10.25	Homo sapiens chemokine (C-C motif) receptor 2 (CCR2), transcript variant A, mRNA [NM_000647]
P48595	SERPINB10	A_23_P313981	0.171	Homo sapiens serine (or cysteine) proteinase inhibitor, clade B (ovalbumin), member 10 (SERPINB10), mRNA [NM_005024]
P48736	PIK3CG	A_24_P637651	3.51
P50238	AL928654.7, CRIP1	A_23_P44674	2.492	Homo sapiens cysteine-rich protein 1 (intestinal) (CRIP1), mRNA [NM_001311]
P51681	CCR5	A_23_P412321	18.46	Homo sapiens chemokine (C-C motif) receptor 5 (CCR5), mRNA [NM_000579]
P52209	PGD	A_23_P126623	2.219	Homo sapiens phosphogluconate dehydrogenase (PGD), mRNA [NM_002631]
P55211	CASP9	A_24_P111342	2.171	Homo sapiens caspase 9, apoptosis-related cysteine protease (CASP9), transcript variant alpha, mRNA [NM_001229]
P55273	CDKN2D	A_23_P89941	2.495	Homo sapiens cyclin-dependent kinase inhibitor 2D (p19, inhibits CDK4) (CDKN2D), transcript variant 1, mRNA [NM_001800]
P55773	CCL23	A_24_P133905	3.002	Homo sapiens chemokine (C-C motif) ligand 23 (CCL23), transcript variant CKbeta8-1, mRNA [NM_005064]
P56559	ARL4C	A_23_P317620	0.0983	Homo sapiens ADP-ribosylation factor-like 7 (ARL7), mRNA [NM_005737]
P58335	ANTXR2	A_23_P170733	3.137	Homo sapiens anthrax toxin receptor 2 (ANTXR2), mRNA [NM_058172]
P59665	DEFA1, DEFA1B	A_23_P31816	2.626	Homo sapiens defensin, alpha 3, neutrophil-specific (DEFA3), mRNA [NM_005217]
P59666	DEFA3	A_23_P31816	2.626	Homo sapiens defensin, alpha 3, neutrophil-specific (DEFA3), mRNA [NM_005217]
P59768	GNG2	A_32_P208403	36.37	Homo sapiens guanine nucleotide binding protein (G protein), gamma 2 (GNG2), mRNA [NM_053064]
P60022	DEFB1	A_23_P71480	0.488	Homo sapiens defensin, beta 1 (DEFB1), mRNA [NM_005218]
P61129	ZC3H6	A_24_P826348	2.807	Homo sapiens mRNA for KIAA2035 protein. [AB111887]
P62324	BTG1	A_23_P87560	2.562	Homo sapiens B-cell translocation gene 1, anti-proliferative (BTG1), mRNA [NM_001731]
P68366	TUBA4A	A_23_P154065	2.586	Homo sapiens tubulin, alpha 1 (testis specific) (TUBA1), mRNA [NM_006000]
P78415	IRX3	A_23_P152235	0.478	Homo sapiens iroquois homeobox protein 3 (IRX3), mRNA [NM_024336]
P78552	IL13RA1	A_24_P280113	2.506	Homo sapiens interleukin 13 receptor, alpha 1 (IL13RA1), mRNA [NM_001560]
Q00796	SORD	A_23_P77103, A_32_P89691	0.482	Homo sapiens sorbitol dehydrogenase (SORD), mRNA [NM_003104]
Q02363	ID2	A_23_P143143, A_32_P69368	2.1015	Homo sapiens inhibitor of DNA binding 2, dominant negative helix-loop-helix protein (ID2), mRNA [NM_002166]
Q03169	TNFAIP2	A_23_P421423	6.978	Homo sapiens tumor necrosis factor, alpha-induced protein 2 (TNFAIP2), mRNA [NM_006291]
Q09327	MGAT3	A_24_P245838	0.356	Homo sapiens cDNA FLJ43371 fis, clone NTONG2005969. [AK125361]
Q0VD83	APOBR	A_23_P54770	2.24	Homo sapiens apolipoprotein B48 receptor (APOB48R), mRNA [NM_182804]
Q11130	FUT7	A_23_P170534	0.349	Homo sapiens fucosyltransferase 7 (alpha (1,3) fucosyltransferase) (FUT7), mRNA [NM_004479]
Q12809	KCNH2	A_23_P168403	0.178	Homo sapiens potassium voltage-gated channel, subfamily H (eag-related), member 2 (KCNH2), transcript variant 1, mRNA [NM_000238]
Q12948	FOXC1	A_23_P390504	5.224	Homo sapiens forkhead box C1 (FOXC1), mRNA [NM_001453]
Q13203	MYBPH	A_23_P148737	8.959	Homo sapiens myosin binding protein H (MYBPH), mRNA [NM_004997]
Q13239	SLA	A_23_P216340	4.017	Homo sapiens Src-like-adaptor (SLA), mRNA [NM_006748]
Q13510	ASAH1	A_23_P216325	2.013	Homo sapiens N-acylsphingosine amidohydrolase (acid ceramidase) 1 (ASAH1), transcript variant 2, mRNA [NM_004315]
Q13636	RAB31	A_23_P141688, A_24_P236799	5.0495	Homo sapiens RAB31, member RAS oncogene family (RAB31), mRNA [NM_006868]
Q13761	RUNX3	A_23_P51231	2.364	Homo sapiens runt-related transcription factor 3 (RUNX3), mRNA [NM_004350]
Q14050	COL9A3	A_23_P40108	2.946	Homo sapiens collagen, type IX, alpha 3 (COL9A3), mRNA [NM_001853]
Q14188	TFDP2	A_23_P166964	0.48	Homo sapiens transcription factor Dp-2 (E2F dimerization partner 2) (TFDP2), mRNA [NM_006286]
Q14246	ADGRE1	A_23_P27556	3.462	Homo sapiens egf-like module containing, mucin-like, hormone receptor-like 1 (EMR1), mRNA [NM_001974]
Q14526	HIC1	A_23_P129856	7.285	Q9V9M3 (Q9V9M3) CG16937-PA, partial (6%) [THC2375716]
Q14642	INPP5A	A_24_P26897	0.392	Homo sapiens inositol polyphosphate-5-phosphatase, 40kDa (INPP5A), mRNA [NM_005539]
Q15118	PDK1	A_24_P37441	0.48	Homo sapiens pyruvate dehydrogenase kinase, isoenzyme 1 (PDK1), nuclear gene encoding mitochondrial protein, mRNA [NM_002610]
Q16548	BCL2A1	A_23_P152002	7.338	Homo sapiens BCL2-related protein A1 (BCL2A1), mRNA [NM_004049]
Q16589	CCNG2	A_23_P110122	2.594	Homo sapiens cyclin G2 (CCNG2), mRNA [NM_004354]
Q16617	NKG7	A_23_P119042	2.125	Homo sapiens natural killer cell group 7 sequence (NKG7), mRNA [NM_005601]
Q16666	IFI16	A_23_P217866	2.022	Homo sapiens cDNA FLJ37649 fis, clone BRHIP2000534, moderately similar to GAMMA-INTERFERON-INDUCIBLE PROTEIN IFI-16. [AK094968]
Q16828	DUSP6	A_23_P139704	2.344	Homo sapiens dual specificity phosphatase 6 (DUSP6), transcript variant 1, mRNA [NM_001946]
Q3KP66	C1orf106	A_23_P1043	2.263	Homo sapiens chromosome 1 open reading frame 106 (C1orf106), mRNA [NM_018265]
Q53GL0	PLEKHO1	A_23_P35114	3.2	Homo sapiens CK2 interacting protein 1; HQ0024c protein (CKIP-1), mRNA [NM_016274]
Q5JSP0	FGD3	A_24_P153840	2.134	Homo sapiens FYVE, RhoGEF and PH domain containing 3 (FGD3), mRNA [NM_033086]
Q5M775	SPECC1	A_23_P38567	3.942	Homo sapiens spectrin domain with coiled-coils 1 (SPECC1), mRNA [NM_152904]
Q5T1R4	HIVEP3	A_32_P59302	5.595	Homo sapiens cDNA clone IMAGE:6254031. [BC080552]
Q5T953	IER5L	A_24_P383450	2.496	Homo sapiens immediate early response 5-like (IER5L), mRNA [NM_203434]
Q5TEJ8	THEMIS2	A_24_P85775	2.265	Homo sapiens chromosome 1 open reading frame 38 (C1orf38), mRNA [NM_004848]
Q5VWP2	FAM46C	A_23_P137751	0.345	Homo sapiens family with sequence similarity 46, member C (FAM46C), mRNA [NM_017709]
Q5VYY1	ANKRD22	A_23_P161428	4.018	Homo sapiens ankyrin repeat domain 22 (ANKRD22), mRNA [NM_144590]
Q6IWH7	ANO7	A_23_P335495	0.372	Homo sapiens transmembrane protein 16G, mRNA (cDNA clone IMAGE:5224810), partial cds. [BC028162]
Q6JBY9	RCSD1	A_23_P23279	4.206	Homo sapiens RCSD domain containing 1 (RCSD1), mRNA [NM_052862]
Q6NYC8	PPP1R18	A_23_P331479	2.187	Homo sapiens KIAA1949, mRNA (cDNA clone MGC:71094 IMAGE:5575643), complete cds. [BC066644]
Q6P1J6	PLB1	A_23_P56356	2.27	Homo sapiens phospholipase B1, mRNA (cDNA clone MGC:35447 IMAGE:5191712), complete cds. [BC042674]
Q6P9G4	TMEM154	A_23_P361584	2.668	Homo sapiens hypothetical protein FLJ32028 (FLJ32028), mRNA [NM_152680]
Q6ZMD2	SPNS3	A_23_P100963	0.495	Homo sapiens hypothetical protein MGC29671 (MGC29671), mRNA [NM_182538]
Q6ZNC4	ZNF704	A_24_P505790	0.39	Homo sapiens cDNA FLJ16218 fis, clone CTONG3001501, highly similar to Mus musculus glucocorticoid-induced gene 1 mRNA. [AK131274]
Q6ZUS5	CCDC121	A_23_P5742	2.034	Homo sapiens hypothetical protein FLJ13646 (FLJ13646), mRNA [NM_024584]
Q6ZWK4	C1orf186	A_23_P95640	0.272	Homo sapiens hypothetical gene supported by AK122631; BC071785 (LOC440712), mRNA [NM_001007544]
Q7L266	ASRGL1	A_23_P1936, A_23_P203392, A_23_P379864	2.35533	Homo sapiens asparaginase like 1 (ASRGL1), mRNA [NM_025080],Homo sapiens asparaginase like 1, mRNA (cDNA clone IMAGE:3952485), complete cds. [BC006267]
Q7RTY1	SLC16A9	A_23_P115726	3.703	Homo sapiens solute carrier family 16 (monocarboxylic acid transporters), member 9 (SLC16A9), mRNA [NM_194298]
Q7Z3S7	CACNA2D4	A_23_P353014	3.239	Homo sapiens calcium channel, voltage-dependent, alpha 2/delta subunit 4 (CACNA2D4), transcript variant 1, mRNA [NM_172364]
Q7Z7M8	B3GNT8	A_23_P101380	2.869	Homo sapiens UDP-Gal:betaGal beta 1,3-galactosyltransferase polypeptide 7 (B3GALT7), mRNA [NM_198540]
Q86VE9	SERINC5	A_24_P6381	0.281	Homo sapiens chromosome 5 open reading frame 12 (C5orf12), mRNA [NM_178276]
Q86Y13	DZIP3	A_23_P144165	2.08	Homo sapiens zinc finger DAZ interacting protein 3 (DZIP3), mRNA [NM_014648]
Q86YS3	RAB11FIP4	A_23_P27023	2.31	Homo sapiens RAB11 family interacting protein 4 (class II) (RAB11FIP4), mRNA [NM_032932]
Q8IV20	LACC1	A_23_P374315	2.153	Homo sapiens hypothetical protein FLJ38725 (FLJ38725), mRNA [NM_153218]
Q8IV56	PRR15	A_32_P154911	2.172	Homo sapiens hypothetical protein LOC222171 (LOC222171), mRNA [NM_175887]
Q8IWU5	SULF2	A_23_P154605	23.63	Homo sapiens sulfatase 2 (SULF2), transcript variant 1, mRNA [NM_018837]
Q8IWW6	ARHGAP12	A_23_P149775	9.999	Homo sapiens Rho GTPase activating protein 12 (ARHGAP12), mRNA [NM_018287]
Q8IX19	MCEMP1	A_23_P330561	9.477	Homo sapiens hypothetical protein LOC199675 (LOC199675), mRNA [NM_174918]
Q8IXL6	FAM20C	A_23_P250122	3.267	Homo sapiens family with sequence similarity 20, member C (FAM20C), mRNA [NM_020223]
Q8N1F8	STK11IP	A_23_P321320	2.57	Homo sapiens serine/threonine kinase 11 interacting protein (STK11IP), mRNA [NM_052902]
Q8N283	ANKRD35	A_23_P325690	3.845	Homo sapiens ankyrin repeat domain 35 (ANKRD35), mRNA [NM_144698]
Q8N357	SLC35F6	A_24_P913339	0.457	Homo sapiens chromosome 2 open reading frame 18, mRNA (cDNA clone IMAGE:3860139), complete cds. [BC016389]
Q8N3Y3	GYLTL1B	A_23_P104617	0.385	Homo sapiens glycosyltransferase-like 1B (GYLTL1B), mRNA [NM_152312]
Q8NCA5	FAM98A	A_24_P119002	0.475	Homo sapiens DKFZP564F0522 protein (DKFZP564F0522), mRNA [NM_015475]
Q8NES3	LFNG	A_23_P8452	2.359	Homo sapiens lunatic fringe homolog (Drosophila) (LFNG), mRNA [NM_002304]
Q8NG11	TSPAN14	A_24_P98613	2.133	Homo sapiens tetraspanin 14 (TSPAN14), mRNA [NM_030927]
Q8NG50	RDM1	A_23_P141447	2.193	Homo sapiens RAD52 homolog B (S. cerevisiae) (RAD52B), mRNA [NM_145654]
Q8TB45	DEPTOR	A_23_P60166	0.243	Homo sapiens DEP domain containing 6 (DEPDC6), mRNA [NM_022783]
Q8TD30	GPT2	A_23_P37892, A_24_P193648	0.4715	Homo sapiens glutamic pyruvate transaminase (alanine aminotransferase) 2 (GPT2), mRNA [NM_133443]
Q8TD35	LKAAEAR1	A_23_P348524	0.498	Homo sapiens bA299N6.3 (LOC198437), mRNA [NM_001007125]
Q8TD55	PLEKHO2	A_23_P129246	2.211	Homo sapiens PH domain-containing protein (pp9099), mRNA [NM_025201]
Q8TDQ1	CD300LF	A_23_P55020, A_24_P279307	2.2565	Homo sapiens CD300 antigen like family member F (CD300LF), mRNA [NM_139018]
Q8TEQ6	GEMIN5	A_23_P336513	0.436	Homo sapiens gem (nuclear organelle) associated protein 5 (GEMIN5), mRNA [NM_015465]
Q8TEZ7	PAQR8	A_23_P214281	2.269	Homo sapiens progestin and adipoQ receptor family member VIII (PAQR8), mRNA [NM_133367]
Q8WU39	MZB1	A_23_P84596	0.459	Homo sapiens proapoptotic caspase adaptor protein (PACAP), mRNA [NM_016459]
Q8WVV9	HNRNPLL	A_24_P225635	3.052	Q8IX05 (Q8IX05) C-type lectin BIMLEC precursor (Type I transmembrane C-type lectin receptor DCL-1), partial (6%) [THC2403280]
Q8WWF1	C1orf54	A_23_P74778	2.068	Homo sapiens chromosome 1 open reading frame 54 (C1orf54), mRNA [NM_024579]
Q8WWI5	SLC44A1	A_23_P216630, A_24_P479510	4.348	AGENCOURT_6542132 NIH_MGC_72 Homo sapiens cDNA clone IMAGE:5549436 5', mRNA sequence [BM550834],Homo sapiens CDW92 antigen (CDW92), transcript variant 2, mRNA [NM_080546]
Q8WWN8	ARAP3	A_23_P167389	4.455	Homo sapiens centaurin, delta 3 (CENTD3), mRNA [NM_022481]
Q92563	SPOCK2	A_23_P161280	2.704	Homo sapiens sparc/osteonectin, cwcv and kazal-like domains proteoglycan (testican) 2 (SPOCK2), mRNA [NM_014767]
Q92692	PVRL2	A_23_P208293	3.989	full-length cDNA clone CS0DI066YH20 of Placenta Cot 25-normalized of Homo sapiens (human). [CR611629]
Q92956	TNFRSF14	A_23_P126908	2.959	Homo sapiens tumor necrosis factor receptor superfamily, member 14 (herpesvirus entry mediator) (TNFRSF14), mRNA [NM_003820]
Q92982	NINJ1	A_23_P169137	2.459	Homo sapiens ninjurin 1 (NINJ1), mRNA [NM_004148]
Q96AX2	RAB37	A_23_P414654	7.591	Homo sapiens RAB37, member RAS oncogene family (RAB37), mRNA [NM_175738]
Q96C23	GALM	A_23_P67971	4.197	Homo sapiens galactose mutarotase (aldose 1-epimerase) (GALM), mRNA [NM_138801]
Q96GA7	SDSL	A_23_P53439	2.495	Homo sapiens serine dehydratase-like (SDSL), mRNA [NM_138432]
Q96Q27	ASB2	A_23_P205370	7.96	Homo sapiens ankyrin repeat and SOCS box-containing 2 (ASB2), mRNA [NM_016150]
Q96RK1	CITED4	A_32_P209230	0.419	Homo sapiens Cbp/p300-interacting transactivator, with Glu/Asp-rich carboxy-terminal domain, 4 (CITED4), mRNA [NM_133467]
Q99678	GPR20	A_23_P159237	2.402	Homo sapiens mRNA for G protein-coupled receptor 20 variant protein. [AB209066]
Q9BRR9	ARHGAP9	A_23_P64661	2.082	Homo sapiens Rho GTPase activating protein 9 (ARHGAP9), mRNA [NM_032496]
Q9BUH8	BEGAIN	A_23_P72127	3.007	Homo sapiens likely ortholog of rat brain-enriched guanylate kinase-associated protein (KIAA1446), mRNA [NM_020836]
Q9BXA5	SUCNR1	A_23_P69171	5.427	Homo sapiens succinate receptor 1 (SUCNR1), mRNA [NM_033050]
Q9BZL3	SMIM3	A_23_P414273	2.667	Homo sapiens putative small membrane protein NID67 (NID67), mRNA [NM_032947]
Q9C0C4	SEMA4C	A_23_P114057	2.861	Homo sapiens sema domain, immunoglobulin domain (Ig), transmembrane domain (TM) and short cytoplasmic domain, (semaphorin) 4C (SEMA4C), mRNA [NM_017789]
Q9H0R5	GBP3	A_24_P370702	3.46	Homo sapiens guanylate binding protein 3 (GBP3), mRNA [NM_018284]
Q9H2L5	RASSF4	A_24_P295590	3.053	Homo sapiens Ras association (RalGDS/AF-6) domain family 4 (RASSF4), transcript variant 1, mRNA [NM_032023]
Q9H2X6	HIPK2	A_23_P169756, A_23_P169766, A_24_P500621	4.36233	Homo sapiens cDNA FLJ23711 fis, clone HEP12371. [AK074291],Homo sapiens homeodomain interacting protein kinase 2 (HIPK2), mRNA [NM_022740]
Q9H4W6	EBF3	A_23_P391396	0.436	Homo sapiens early B-cell factor 3 (EBF3), mRNA [NM_001005463]
Q9H6L5	FAM134B	A_23_P167599	2.567	Homo sapiens hypothetical protein FLJ20152 (FLJ20152), mRNA [NM_019000]
Q9H7M9	C10orf54	A_23_P24077	3.424	Homo sapiens chromosome 10 open reading frame 54 (C10orf54), mRNA [NM_022153]
Q9H8H3	METTL7A	A_23_P415021	3.84	Homo sapiens DKFZP586A0522 protein (DKFZP586A0522), mRNA [NM_014033]
Q9H9V4	RNF122	A_23_P134744	2.997	Homo sapiens ring finger protein 122 (RNF122), mRNA [NM_024787]
Q9HA72	CALHM2	A_23_P202219	4.743	Homo sapiens family with sequence similarity 26, member B (FAM26B), mRNA [NM_015916]
Q9HBF5	ST20	A_23_P321703	6.125	Homo sapiens cervical cancer suppressor 1
Q9HC97	GPR35	A_23_P154245	4.033	Homo sapiens G protein-coupled receptor 35 (GPR35), mRNA [NM_005301]
Q9HCU8	POLD4	A_23_P127367	2.168	Homo sapiens polymerase (DNA-directed), delta 4 (POLD4), mRNA [NM_021173]
Q9HD89	RETN	A_23_P119222	4.458	Homo sapiens resistin (RETN), mRNA [NM_020415]
Q9NPI7	KRCC1	A_23_P56759	2.382	Homo sapiens hypothetical protein LOC51315 (LOC51315), mRNA [NM_016618]
Q9NPP4	NLRC4	A_23_P119835	5.273	Homo sapiens caspase recruitment domain family, member 12 (CARD12), mRNA [NM_021209]
Q9NQ48	LZTFL1	A_23_P41049, A_24_P37519	2.212	Homo sapiens leucine zipper transcription factor-like 1 (LZTFL1), mRNA [NM_020347]
Q9NQ84	GPRC5C	A_23_P38167	4.028	Homo sapiens G protein-coupled receptor, family C, group 5, member C (GPRC5C), transcript variant 1, mRNA [NM_022036]
Q9NQX7	ITM2C	A_24_P402690	0.495	Homo sapiens integral membrane protein 2C (ITM2C), transcript variant 1, mRNA [NM_030926]
Q9NRK6	ABCB10	A_23_P201918, A_24_P274073, A_32_P23624	0.409333	Homo sapiens ATP-binding cassette, sub-family B (MDR/TAP), member 10 (ABCB10), nuclear gene encoding mitochondrial protein, mRNA [NM_012089]
Q9NUL5	C19orf66	A_23_P38894	2.087	Homo sapiens hypothetical protein FLJ11286 (FLJ11286), mRNA [NM_018381]
Q9NWM0	SMOX	A_23_P102731	4.596	Homo sapiens spermine oxidase (SMOX), transcript variant 1, mRNA [NM_175839]
Q9NX09	DDIT4	A_23_P104318	2.208	Homo sapiens DNA-damage-inducible transcript 4 (DDIT4), mRNA [NM_019058]
Q9NXW2	DNAJB12	A_24_P244096, A_24_P244100	2.6615	Homo sapiens DnaJ (Hsp40) homolog, subfamily B, member 12 (DNAJB12), transcript variant 1, mRNA [NM_001002762]
Q9NZV6	MSRB1	A_23_P129486, A_23_P129492	2.0645	Homo sapiens selenoprotein X, 1 (SEPX1), mRNA [NM_016332]
Q9P2A4	ABI3	A_23_P141429	2.862	Homo sapiens ABI gene family, member 3 (ABI3), mRNA [NM_016428]
Q9UBR2	CTSZ	A_23_P40240	2.732	Homo sapiens cathepsin Z (CTSZ), mRNA [NM_001336]
Q9UBU3	GHRL	A_23_P40956	5.301	Homo sapiens ghrelin precursor (GHRL), mRNA [NM_016362]
Q9UDT6	CLIP2	A_23_P215479	2.048	Homo sapiens cytoplasmic linker 2 (CYLN2), transcript variant 1, mRNA [NM_003388]
Q9UEY8	ADD3	A_23_P202435	2.677	Homo sapiens adducin 3 (gamma) (ADD3), transcript variant 1, mRNA [NM_016824]
Q9UGN4	CD300A	A_23_P207037, A_24_P159434	8.552	Homo sapiens CD300A antigen (CD300A), mRNA [NM_007261]
Q9UIA0	CYTH4	A_23_P155057	2.493	Homo sapiens pleckstrin homology, Sec7 and coiled-coil domains 4 (PSCD4), mRNA [NM_013385]
Q9UKS7	IKZF2	A_32_P114284, A_32_P127978	0.299	NQRB_CHLMU (Q9PKB6) Probable Na(+)-translocating NADH-quinone reductase subunit B (Na(+)-translocating NQR subunit B) (Na(+)-NQR subunit B) (NQR complex subunit B) (NQR-1 subunit B) , partial (4%) [THC2338091]
Q9UL18	AGO1	A_23_P11764	2.364	Homo sapiens eukaryotic translation initiation factor 2C, 1 (EIF2C1), mRNA [NM_012199]
Q9UL19	RARRES3	A_23_P1962	2.803	Homo sapiens retinoic acid receptor responder (tazarotene induced) 3 (RARRES3), mRNA [NM_004585]
Q9UN19	DAPP1	A_23_P255444	2.358	Homo sapiens dual adaptor of phosphotyrosine and 3-phosphoinositides (DAPP1), mRNA [NM_014395]
Q9Y228	TRAF3IP3	A_23_P323761, A_23_P334414	2.0855	Homo sapiens TRAF3 interacting protein 3 (TRAF3IP3), mRNA [NM_025228]
Q9Y2D1	ATF5	A_23_P119337	0.477	Homo sapiens activating transcription factor 5 (ATF5), mRNA [NM_012068]
Q9Y4D7	PLXND1	A_24_P376391	0.43	Homo sapiens plexin D1 (PLXND1), mRNA [NM_015103]
Q9Y4P3	TBL2	A_23_P134395	2.085	Homo sapiens transducin (beta)-like 2 (TBL2), transcript variant 2, mRNA [NM_032988]
Q9Y6H6	KCNE3	A_23_P24948	3.279	Homo sapiens potassium voltage-gated channel, Isk-related family, member 3 (KCNE3), mRNA [NM_005472]

## Sheet: DEGs at 96h
ID	Gene symbol	Agilent ID	Fold Change	Description
A0PJZ3	GXYLT2	A_32_P3214	0.399	Q93KJ6 (Q93KJ6) Dissimilatory (Bi-)sulfite reductase beta subunit (Fragment), partial (5%) [THC2433340]
A1L390	PLEKHG3	A_23_P76901	2.402	Homo sapiens pleckstrin homology domain containing, family G (with RhoGef domain) member 3 (PLEKHG3), mRNA [NM_015549]
A2A2Z9	ANKRD18B	A_24_P160773	0.421	Homo sapiens similar to bA255A11.3 (novel protein similar to KIAA1074) (LOC441459), mRNA [NM_001013728]
A2VDF0	FUOM	A_24_P186379	0.473	Homo sapiens chromosome 10 open reading frame 125 (C10orf125), mRNA [NM_198472]
A3KMH1	VWA8	A_24_P109351	0.4	Homo sapiens KIAA0564 protein (KIAA0564), transcript variant 2, mRNA [NM_001009814]
A3KN83	SBNO1	A_23_P36458	0.425	Homo sapiens cDNA FLJ10701 fis, clone NT2RP3000690. [AK001563]
A5PL33	KRBA1	A_32_P38637	3.05	Homo sapiens KIAA1862 protein (KIAA1862), mRNA [NM_032534]
A6NC98	CCDC88B	A_23_P24384	4.595	Homo sapiens hypothetical protein FLJ37970 (FLJ37970), mRNA [NM_032251]
A6NDK8		A_23_P127279	0.444	Homo sapiens family with sequence similarity 35, member A (FAM35A), mRNA [NM_019054]
A6NGR9	MROH6	A_23_P369634	0.477	Homo sapiens clone pp7882 unknown mRNA. [AF289596]
A6ZKI3	FAM127A	A_23_P85236	2.998	Homo sapiens CAAX box 1 (CXX1), mRNA [NM_003928]
A8K4G0	CD300LB	A_23_P15369	8.609	Homo sapiens CD300 antigen like family member B (CD300LB), mRNA [NM_174892]
A8K855	EFCAB7	A_32_P137266	0.475	Homo sapiens KIAA1799 protein (KIAA1799), mRNA [NM_032437]
A8MQB3	C17orf51	A_24_P59607	0.146	Homo sapiens hypothetical protein LOC339263, mRNA (cDNA clone IMAGE:3924994), partial cds. [BC019938]
A8MVS5	C19orf38	A_23_P142055	2.102	PREDICTED: Homo sapiens similar to HIDE1 (LOC255809), mRNA [XM_172995]
B1AH88	TSPO	A_24_P134526	0.403	Homo sapiens benzodiazapine receptor (peripheral) (BZRP), transcript variant PBR-S, mRNA [NM_007311]
C9JLW8	FAM195B	A_24_P237878	2.456	Homo sapiens hypothetical protein LOC348262 (LOC348262), mRNA [NM_207368]
O00142	TK2	A_23_P351679	3.198	Homo sapiens thymidine kinase 2, mitochondrial (TK2), mRNA [NM_004614]
O00154	ACOT7	A_24_P205589	0.443	Homo sapiens brain acyl-CoA hydrolase (BACH), transcript variant hBACHb, mRNA [NM_181864]
O00160	MYO1F	A_23_P142447, A_24_P323610	2.5725	Homo sapiens myosin IF (MYO1F), mRNA [NM_012335]
O00206	TLR4	A_32_P66881	2.589	Toll-like receptor 4
O00220	TNFRSF10A	A_23_P255653	0.385	Homo sapiens tumor necrosis factor receptor superfamily, member 10a (TNFRSF10A), mRNA [NM_003844]
O00221	NFKBIE	A_23_P30655	2.057	Homo sapiens nuclear factor of kappa light polypeptide gene enhancer in B-cells inhibitor, epsilon (NFKBIE), mRNA [NM_004556]
O00273	DFFA	A_24_P222758	0.47	Homo sapiens DNA fragmentation factor, 45kDa, alpha polypeptide (DFFA), transcript variant 1, mRNA [NM_004401]
O00329	PIK3CD	A_24_P71244	2.172	Homo sapiens phosphoinositide-3-kinase, catalytic, delta polypeptide (PIK3CD), mRNA [NM_005026]
O00453	LST1	A_24_P103469, A_24_P94916	3.5665	Homo sapiens leukocyte specific transcript 1 (LST1), transcript variant 1, mRNA [NM_007161]
O00462	MANBA	A_23_P258698	2.907	Homo sapiens mannosidase, beta A, lysosomal (MANBA), mRNA [NM_005908]
O00472	ELL2	A_23_P41645, A_23_P58506	3.4855	Homo sapiens elongation factor, RNA polymerase II, 2 (ELL2), mRNA [NM_012081],Homo sapiens mRNA; cDNA DKFZp779C185 (from clone DKFZp779C185). [BX538289]
O00505	KPNA3	A_23_P139950	0.474	Homo sapiens karyopherin alpha 3 (importin alpha 4) (KPNA3), mRNA [NM_002267]
O00560	SDCBP	A_23_P157580	2.836	Homo sapiens syndecan binding protein (syntenin) (SDCBP), transcript variant 1, mRNA [NM_005625]
O00567	NOP56	A_23_P91328, A_24_P101402	0.402	Homo sapiens nucleolar protein 5A (56kDa with KKE/D repeat) (NOL5A), mRNA [NM_006392]
O14523	C2CD2L	A_23_P353056	2.055	Homo sapiens transmembrane protein 24 (TMEM24), mRNA [NM_014807]
O14562	UBFD1	A_23_P15123	0.463	Homo sapiens similar to ubiquitin binding protein (UBPH), mRNA [NM_019116]
O14595	CTDSP2	A_23_P44149, A_23_P81880	3.393	Homo sapiens CTD (carboxy-terminal domain, RNA polymerase II, polypeptide A) small phosphatase 2 (CTDSP2), mRNA [NM_005730]
O14715	RGPD8	A_32_P129660	4.358	Homo sapiens GRIP and coiled-coil domain containing 2 (GCC2), transcript variant 1, mRNA [NM_181453]
O14727	APAF1	A_23_P36611	2.621	Homo sapiens apoptotic protease activating factor (APAF1), transcript variant 3, mRNA [NM_181861]
O14737	PDCD5	A_24_P339611	0.416	Homo sapiens programmed cell death 5 (PDCD5), mRNA [NM_004708]
O14744	PRMT5	A_23_P76851, A_24_P298420	0.378	Homo sapiens SKB1 homolog (S. pombe) (SKB1), mRNA [NM_006109]
O14746	TERT	A_23_P110851	0.109	Homo sapiens telomerase reverse transcriptase (TERT), transcript variant 1, mRNA [NM_003219]
O14757	CHEK1	A_23_P116123	0.453	Homo sapiens CHK1 checkpoint homolog (S. pombe) (CHEK1), mRNA [NM_001274]
O14763	TNFRSF10B	A_24_P218265	0.337	Homo sapiens tumor necrosis factor receptor superfamily, member 10b (TNFRSF10B), transcript variant 1, mRNA [NM_003842]
O14773	TPP1	A_24_P38815	3.462	Homo sapiens tripeptidyl peptidase I (TPP1), mRNA [NM_000391]
O14802	POLR3A	A_24_P85283	0.395	Homo sapiens polymerase (RNA) III (DNA directed) polypeptide A, 155kDa (POLR3A), mRNA [NM_007055]
O14933	UBE2L6	A_23_P75741	2.515	Homo sapiens ubiquitin-conjugating enzyme E2L 6 (UBE2L6), transcript variant 2, mRNA [NM_198183]
O15016	TRIM66	A_32_P396186	2.021	Homo sapiens cDNA FLJ10046 fis, clone HEMBA1001133. [AK000908]
O15031	PLXNB2	A_24_P70888, A_32_P48397	2.187	Human mRNA for KIAA0315 gene, partial cds. [AB002313]
O15040	TECPR2	A_23_P394216	2.188	Homo sapiens KIAA0329 (KIAA0329), mRNA [NM_014844]
O15067	PFAS	A_23_P402604, A_23_P402610	0.344	Homo sapiens phosphoribosylformylglycinamidine synthase (FGAR amidotransferase) (PFAS), mRNA [NM_012393]
O15078	CEP290	A_23_P25463	0.394	Homo sapiens centrosome protein cep290 (Cep290), mRNA [NM_025114]
O15117	FYB	A_24_P393740	3.678	Homo sapiens FYN binding protein (FYB-120/130) (FYB), mRNA [NM_001465]
O15143	ARPC1B	A_23_P20196	2.099	Homo sapiens actin related protein 2/3 complex, subunit 1B, 41kDa (ARPC1B), mRNA [NM_005720]
O15156	ZBTB7B	A_24_P19884	2.42	Homo sapiens cDNA FLJ45990 fis, clone RECTM2001519. [AK127884]
O15211	RGL2	A_23_P93383	2.073	Homo sapiens ral guanine nucleotide dissociation stimulator-like 2 (RGL2), mRNA [NM_004761]
O15357	INPPL1	A_23_P36322	2.58	Homo sapiens inositol polyphosphate phosphatase-like 1 (INPPL1), mRNA [NM_001567]
O15431	SLC31A1	A_24_P252667	0.494	Homo sapiens solute carrier family 31 (copper transporters), member 1 (SLC31A1), mRNA [NM_001859]
O15446	CD3EAP	A_23_P208310, A_24_P267452	0.3595	Homo sapiens CD3E antigen, epsilon polypeptide associated protein (CD3EAP), mRNA [NM_012099]
O15479	MAGEB2	A_23_P254831	0.333	Homo sapiens melanoma antigen family B, 2 (MAGEB2), mRNA [NM_002364]
O15492	RGS16	A_23_P217845, A_23_P320578	0.08385	Homo sapiens regulator of G-protein signalling 16 (RGS16), mRNA [NM_002928]
O15503	INSIG1	A_23_P73096	2.652	AW993939 RC1-BN0035-130400-013-b06 BN0035 Homo sapiens cDNA, mRNA sequence [AW993939]
O15524	SOCS1	A_23_P420196	4.265	Homo sapiens suppressor of cytokine signaling 1 (SOCS1), mRNA [NM_003745]
O15554	KCNN4	A_23_P67529	0.234	Homo sapiens potassium intermediate/small conductance calcium-activated channel, subfamily N, member 4 (KCNN4), mRNA [NM_002250]
O43148	RNMT	A_23_P55515	0.457	Homo sapiens RNA (guanine-7-) methyltransferase (RNMT), mRNA [NM_003799]
O43167	ZBTB24	A_24_P273716	0.372	Homo sapiens zinc finger and BTB domain containing 24 (ZBTB24), mRNA [NM_014797]
O43175	PHGDH	A_23_P85783	0.304	Homo sapiens phosphoglycerate dehydrogenase (PHGDH), mRNA [NM_006623]
O43255	SIAH2	A_23_P69121	0.408	Homo sapiens seven in absentia homolog 2 (Drosophila) (SIAH2), mRNA [NM_005067]
O43286	B4GALT5	A_24_P239731, A_24_P365469	5.467	Homo sapiens UDP-Gal:betaGlcNAc beta 1,4- galactosyltransferase, polypeptide 5 (B4GALT5), mRNA [NM_004776]
O43310	CTIF	A_23_P207967	0.408	Homo sapiens KIAA0427 (KIAA0427), mRNA [NM_014772]
O43324	EEF1E1	A_23_P156842	0.368	Homo sapiens eukaryotic translation elongation factor 1 epsilon 1 (EEF1E1), mRNA [NM_004280]
O43374	RASA4	A_24_P943263	2.231	Homo sapiens RAS p21 protein activator 4 (RASA4), mRNA [NM_006989]
O43405	COCH	A_24_P184799, A_24_P184803	0.2795	Homo sapiens coagulation factor C homolog, cochlin (Limulus polyphemus) (COCH), mRNA [NM_004086]
O43516	WIPF1	A_23_P330611	2.114	Homo sapiens Wiskott-Aldrich syndrome protein interacting protein (WASPIP), mRNA [NM_003387]
O43566	RGS14	A_23_P124927	2.118	Homo sapiens regulator of G-protein signalling 14 (RGS14), mRNA [NM_006480]
O43592	XPOT	A_23_P340722, A_32_P13719	0.448	Homo sapiens exportin, tRNA (nuclear export receptor for tRNAs) (XPOT), mRNA [NM_007235]
O43609	SPRY1	A_23_P144476	0.25	Homo sapiens sprouty homolog 1, antagonist of FGF signaling (Drosophila) (SPRY1), transcript variant 2, mRNA [NM_199327]
O43613	HCRTR1	A_23_P74178	2.05	Homo sapiens hypocretin (orexin) receptor 1 (HCRTR1), mRNA [NM_001525]
O43615	TIMM44	A_23_P119214	0.445	Homo sapiens translocase of inner mitochondrial membrane 44 homolog (yeast) (TIMM44), mRNA [NM_006351]
O43665	RGS10	A_23_P138717	2.839	Homo sapiens regulator of G-protein signalling 10 (RGS10), transcript variant 1, mRNA [NM_001005339]
O43699	SIGLEC6	A_23_P4592	2.205	Homo sapiens sialic acid binding Ig-like lectin 6 (SIGLEC6), transcript variant 1, mRNA [NM_001245]
O43716	GATC	A_23_P76435	0.372	Homo sapiens hypothetical protein 15E1.2 (15E1.2), mRNA [NM_176818]
O43736	ITM2A	A_23_P171074	0.202	Homo sapiens integral membrane protein 2A (ITM2A), mRNA [NM_004867]
O43772	SLC25A20	A_23_P72025	2.047	Homo sapiens solute carrier family 25 (carnitine/acylcarnitine translocase), member 20 (SLC25A20), nuclear gene encoding mitochondrial protein, mRNA [NM_000387]
O43781	DYRK3	A_23_P12282	2.102	Homo sapiens dual-specificity tyrosine-(Y)-phosphorylation regulated kinase 3 (DYRK3), transcript variant 2, mRNA [NM_001004023]
O43808	SLC25A17	A_23_P57547	0.442	Homo sapiens solute carrier family 25 (mitochondrial carrier; peroxisomal membrane protein, 34kDa), member 17 (SLC25A17), nuclear gene encoding mitochondrial protein, mRNA [NM_006358]
O43818	RRP9	A_23_P6802	0.43	Homo sapiens RNA, U3 small nucleolar interacting protein 2 (RNU3IP2), mRNA [NM_004704]
O43913	ORC5	A_24_P394698	0.434	Homo sapiens origin recognition complex, subunit 5-like (yeast) (ORC5L), transcript variant 2, mRNA [NM_181747]
O43914	TYROBP	A_23_P27994	4.827	Homo sapiens TYRO protein tyrosine kinase binding protein (TYROBP), transcript variant 1, mRNA [NM_003332]
O60243	HS6ST1	A_24_P8220	0.436	Homo sapiens, Similar to heparan sulfate 6-O-sulfotransferase, clone IMAGE:3355592, mRNA, partial cds. [BC001196]
O60287	URB1	A_23_P57293	0.357	Homo sapiens chromosome 21 C21orf108 mRNA, partial cds. [AF231919]
O60290	ZNF862	A_24_P333421	5.483	Homo sapiens mRNA for KIAA0543 protein, partial cds. [AB011115]
O60336	MAPKBP1	A_24_P272594	2.062	Homo sapiens mitogen activated protein kinase binding protein 1 (MAPKBP1), mRNA [NM_014994]
O60343	TBC1D4	A_23_P88095	0.263	Homo sapiens TBC1 domain family, member 4 (TBC1D4), mRNA [NM_014832]
O60361		A_23_P141405	0.484	Homo sapiens non-metastatic cells 2, protein (NM23B) expressed in (NME2), transcript variant 2, mRNA [NM_002512]
O60381	HBP1	A_23_P215787	2.011	Homo sapiens HMG-box transcription factor 1 (HBP1), mRNA [NM_012257]
O60449	LY75	A_23_P334173	3.514	Homo sapiens lymphocyte antigen 75 (LY75), mRNA [NM_002349]
O60503	ADCY9	A_24_P935103	0.466	Homo sapiens adenylate cyclase 9 (ADCY9), mRNA [NM_001116]
O60568	PLOD3	A_23_P168788	2.061	Homo sapiens procollagen-lysine, 2-oxoglutarate 5-dioxygenase 3 (PLOD3), mRNA [NM_001084]
O60610	DIAPH1	A_24_P323104	0.488	Homo sapiens diaphanous homolog 1 (Drosophila) (DIAPH1), mRNA [NM_005219]
O60671	RAD1	A_23_P144697	0.399	Homo sapiens RAD1 homolog (S. pombe) (RAD1), transcript variant 3, mRNA [NM_133377]
O60675	MAFK	A_23_P373598	0.371	Homo sapiens cDNA FLJ32205 fis, clone PLACE6003094. [AK056767]
O60678	PRMT3	A_23_P9894	0.417	Homo sapiens HMT1 hnRNP methyltransferase-like 3 (S. cerevisiae) (HRMT1L3), mRNA [NM_005788]
O60739	EIF1B	A_23_P6891	3.914	Homo sapiens translation factor sui1 homolog (GC20), mRNA [NM_005875]
O60814	HIST1H2BK	A_23_P145238, A_23_P40470	4.8255	Homo sapiens H2B histone family, member S (H2BFS), mRNA [NM_017445],Homo sapiens histone 1, H2bk (HIST1H2BK), mRNA [NM_080593]
O60832	DKC1	A_23_P137143	0.496	Homo sapiens dyskeratosis congenita 1, dyskerin (DKC1), mRNA [NM_001363]
O60841	EIF5B	A_23_P218608	0.461	Homo sapiens eukaryotic translation initiation factor 5B (EIF5B), mRNA [NM_015904]
O60894	RAMP1	A_23_P50946	2.177	Homo sapiens receptor (calcitonin) activity modifying protein 1 (RAMP1), mRNA [NM_005855]
O60909	B4GALT2	A_23_P149206, A_24_P242440	0.2525	Homo sapiens UDP-Gal:betaGlcNAc beta 1,4- galactosyltransferase, polypeptide 2 (B4GALT2), transcript variant 2, mRNA [NM_003780]
O60930	RNASEH1	A_23_P27167	0.482	Homo sapiens ribonuclease H1 (RNASEH1), mRNA [NM_002936]
O75144	CH507-9B2.1, ICOSLG	A_23_P166280	0.174	UI-E-EJ1-ajv-o-09-0-UI.r1 UI-E-EJ1 Homo sapiens cDNA clone UI-E-EJ1-ajv-o-09-0-UI 5', mRNA sequence [BQ189193]
O75146	HIP1R	A_23_P398294	2.134	Homo sapiens huntingtin interacting protein-1-related (HIP1R), mRNA [NM_003959]
O75165	DNAJC13	A_23_P166910	2.109	Homo sapiens DnaJ (Hsp40) homolog, subfamily C, member 13 (DNAJC13), mRNA [NM_173823]
O75264	SMIM24	A_23_P397120	4.077	Homo sapiens HSPC323 mRNA, partial cds. [AF161441]
O75324	SNN	A_24_P30923	8.387	Homo sapiens stannin (SNN), mRNA [NM_003498]
O75362	ZNF217	A_23_P210608	3.551	Homo sapiens zinc finger protein 217 (ZNF217), mRNA [NM_006526]
O75368	SH3BGRL	A_23_P148297	2.566	Homo sapiens SH3 domain binding glutamic acid-rich protein like (SH3BGRL), mRNA [NM_003022]
O75509	TNFRSF21	A_23_P30666	0.341	Homo sapiens tumor necrosis factor receptor superfamily, member 21 (TNFRSF21), mRNA [NM_014452]
O75521	ECI2	A_23_P156852	0.43	Homo sapiens peroxisomal D3,D2-enoyl-CoA isomerase (PECI), transcript variant 2, mRNA [NM_206836]
O75607	NPM3	A_23_P52298	0.43	Homo sapiens nucleophosmin/nucleoplasmin, 3 (NPM3), mRNA [NM_006993]
O75683	SURF6	A_24_P21447	0.432	Homo sapiens surfeit 6 (SURF6), mRNA [NM_006753]
O75691	UTP20	A_23_P162525	0.322	Homo sapiens down-regulated in metastasis (DRIM), mRNA [NM_014503]
O75694	NUP155	A_23_P7679, A_32_P142149	0.4285	Homo sapiens cDNA clone IMAGE:4304686, partial cds. [BC007784],Homo sapiens nucleoporin 155kDa (NUP155), transcript variant 1, mRNA [NM_153485]
O75915	ARL6IP5	A_23_P166640, A_24_P257348	2.4985	Homo sapiens ADP-ribosylation-like factor 6 interacting protein 5 (ARL6IP5), mRNA [NM_006407]
O75955	FLOT1	A_23_P214603	3.387	Homo sapiens flotillin 1 (FLOT1), mRNA [NM_005803]
O75976	CPD	A_23_P207837, A_24_P53282	2.6675	Homo sapiens carboxypeptidase D (CPD), mRNA [NM_001304]
O75995	SASH3	A_24_P237443	3.655	Homo sapiens chromosome X open reading frame 9 (CXorf9), mRNA [NM_018990]
O76003	GLRX3	A_24_P381029	0.441	Homo sapiens thioredoxin-like 2 (TXNL2), mRNA [NM_006541]
O76062	TM7SF2	A_23_P127426	2.794	Homo sapiens transmembrane 7 superfamily member 2 (TM7SF2), mRNA [NM_003273]
O76094	SRP72	A_32_P174713	0.385	Homo sapiens signal recognition particle 72kDa (SRP72), mRNA [NM_006947]
O76096	CST7	A_23_P68601	0.319	Homo sapiens cystatin F (leukocystatin) (CST7), mRNA [NM_003650]
O94759	TRPM2	A_24_P27977	2.057	Homo sapiens transient receptor potential cation channel, subfamily M, member 2 (TRPM2), transcript variant S, mRNA [NM_001001188]
O94760	DDAH1	A_23_P201386	0.3	Homo sapiens dimethylarginine dimethylaminohydrolase 1 (DDAH1), mRNA [NM_012137]
O94826	TOMM70A	A_23_P144264	0.467	Homo sapiens translocase of outer mitochondrial membrane 70 homolog A (yeast) (TOMM70A), nuclear gene encoding mitochondrial protein, mRNA [NM_014820]
O94851	MICAL2	A_23_P24843	0.398	Homo sapiens microtubule associated monoxygenase, calponin and LIM domain containing 2 (MICAL2), mRNA [NM_014632]
O94880	PHF14	A_23_P134384	0.479	Homo sapiens PHD finger protein 14 (PHF14), transcript variant 2, mRNA [NM_014660]
O94901	SUN1	A_23_P169838	0.252	Homo sapiens unc-84 homolog A (C. elegans) (UNC84A), mRNA [NM_025154]
O94925	GLS	A_23_P39766	2.137	Homo sapiens glutaminase (GLS), mRNA [NM_014905]
O94972	TRIM37	A_24_P153853	0.366	Homo sapiens tripartite motif-containing 37 (TRIM37), transcript variant 2, mRNA [NM_001005207]
O94986	CEP152	A_32_P220519	0.473	Homo sapiens KIAA0912 protein (Cep152), mRNA [NM_014985]
O95166	GABARAP	A_23_P27075	2.125	Homo sapiens GABA(A) receptor-associated protein (GABARAP), mRNA [NM_007278]
O95183	VAMP5	A_23_P39840	2.545	Homo sapiens vesicle-associated membrane protein 5 (myobrevin) (VAMP5), mRNA [NM_006634]
O95190	OAZ2	A_23_P106463	2.714	Homo sapiens ornithine decarboxylase antizyme 2 (OAZ2), mRNA [NM_002537]
O95202	LETM1	A_23_P94998	0.381	Homo sapiens leucine zipper-EF-hand containing transmembrane protein 1 (LETM1), mRNA [NM_012318]
O95273	CCNDBP1	A_23_P26243	2.094	Homo sapiens cyclin D-type binding-protein 1 (CCNDBP1), transcript variant 2, mRNA [NM_037370]
O95294	RASAL1	A_23_P139600	2.091	Homo sapiens RAS protein activator like 1 (GAP1 like) (RASAL1), mRNA [NM_004658]
O95297	MPZL1	A_23_P11874, A_24_P242391	0.279	Homo sapiens myelin protein zero-like 1 (MPZL1), transcript variant 1, mRNA [NM_003953]
O95379	TNFAIP8	A_32_P219520	0.338	Homo sapiens tumor necrosis factor, alpha-induced protein 8 (TNFAIP8), mRNA [NM_014350]
O95394	PGM3	A_23_P19592	0.414	Homo sapiens phosphoglucomutase 3 (PGM3), mRNA [NM_015599]
O95415	BRI3	A_23_P122915	4.257	Homo sapiens brain protein I3 (BRI3), mRNA [NM_015379]
O95456	PSMG1	A_23_P68717	0.358	Homo sapiens Down syndrome critical region gene 2 (DSCR2), transcript variant 1, mRNA [NM_003720]
O95711	LY86	A_23_P70688	2.576	Homo sapiens lymphocyte antigen 86 (LY86), mRNA [NM_004271]
O95757	HSPA4L	A_23_P363936	0.286	Homo sapiens heat shock 70kDa protein 4-like (HSPA4L), mRNA [NM_014278]
O95816	BAG2	A_23_P356554	0.378	Homo sapiens BCL2-associated athanogene 2 (BAG2), mRNA [NM_004282]
O95848	NUDT14	A_32_P5976	2.18	Homo sapiens nudix (nucleoside diphosphate linked moiety X)-type motif 14 (NUDT14), mRNA [NM_177533]
O95861	BPNT1	A_23_P104046, A_24_P122636	0.449	Homo sapiens 3'(2'), 5'-bisphosphate nucleotidase 1 (BPNT1), mRNA [NM_006085]
O95864	FADS2	A_23_P98580	5.502	Homo sapiens fatty acid desaturase 2 (FADS2), mRNA [NM_004265]
O95865	DDAH2	A_23_P19482	4.645	Homo sapiens dimethylarginine dimethylaminohydrolase 2 (DDAH2), mRNA [NM_013974]
O96008	TOMM40	A_24_P15754	0.438	Homo sapiens translocase of outer mitochondrial membrane 40 homolog (yeast) (TOMM40), mRNA [NM_006114]
P00338	LDHA	A_23_P47565	0.44	Homo sapiens lactate dehydrogenase A (LDHA), mRNA [NM_005566]
P00374	DHFR	A_23_P167553, A_24_P320284, A_24_P343095	0.442333	Homo sapiens dihydrofolate reductase (DHFR), mRNA [NM_000791]
P00441	SOD1	A_23_P154840	0.328	Homo sapiens superoxide dismutase 1, soluble (amyotrophic lateral sclerosis 1 (adult)) (SOD1), mRNA [NM_000454]
P00738	HP	A_23_P206760	7.726	Homo sapiens haptoglobin (HP), mRNA [NM_005143]
P00739	HPR	A_23_P206760	7.726	Homo sapiens haptoglobin (HP), mRNA [NM_005143]
P00746	CFD	A_23_P119562	2.314	Homo sapiens D component of complement (adipsin) (DF), mRNA [NM_001928]
P00748	F12	A_23_P167674	0.285	Homo sapiens coagulation factor XII (Hageman factor) (F12), mRNA [NM_000505]
P00749	PLAU	A_23_P24104	2.315	Homo sapiens plasminogen activator, urokinase (PLAU), mRNA [NM_002658]
P00918	CA2	A_23_P8913	0.23	Homo sapiens carbonic anhydrase II (CA2), mRNA [NM_000067]
P00966	ASS1	A_23_P31921	0.157	Homo sapiens argininosuccinate synthetase (ASS), transcript variant 2, mRNA [NM_054012]
P01033	TIMP1	A_23_P62115	4.302	Homo sapiens tissue inhibitor of metalloproteinase 1 (erythroid potentiating activity, collagenase inhibitor) (TIMP1), mRNA [NM_003254]
P01034	CST3	A_24_P216294	4.159	Homo sapiens cystatin C (amyloid angiopathy and cerebral hemorrhage) (CST3), mRNA [NM_000099]
P01106	MYC	A_23_P215956	0.142	Homo sapiens v-myc myelocytomatosis viral oncogene homolog (avian) (MYC), mRNA [NM_002467]
P01130	LDLR	A_24_P117029	2.878	Homo sapiens low density lipoprotein receptor (familial hypercholesterolemia) (LDLR), mRNA [NM_000527]
P01584	IL1B	A_23_P79518	0.17	Homo sapiens interleukin 1, beta (IL1B), mRNA [NM_000576]
P02750	LRG1	A_23_P50638	8.695	Homo sapiens leucine-rich alpha-2-glycoprotein 1 (LRG1), mRNA [NM_052972]
P02786	TFRC	A_23_P212617	0.465	Homo sapiens transferrin receptor (p90, CD71) (TFRC), mRNA [NM_003234]
P04066	FUCA1	A_23_P11543	2.305	Homo sapiens fucosidase, alpha-L- 1, tissue (FUCA1), mRNA [NM_000147]
P04080	CSTB	A_23_P154894	2.263	Homo sapiens cystatin B (stefin B) (CSTB), mRNA [NM_000100]
P04156	PRNP	A_23_P109143	0.426	Homo sapiens prion protein (p27-30) (Creutzfeld-Jakob disease, Gerstmann-Strausler-Scheinker syndrome, fatal familial insomnia) (PRNP), transcript variant 1, mRNA [NM_000311]
P04179	SOD2	A_23_P134176	0.39	Homo sapiens superoxide dismutase 2, mitochondrial (SOD2), nuclear gene encoding mitochondrial protein, transcript variant 1, mRNA [NM_000636]
P04745	AMY1A, AMY1B, AMY1C	A_23_P23611	3.518	Homo sapiens amylase, alpha 1C; salivary (AMY1C), mRNA [NM_001008219]
P04839	CYBB	A_23_P217258, A_24_P365767	11.5845	Homo sapiens cytochrome b-245, beta polypeptide (chronic granulomatous disease) (CYBB), mRNA [NM_000397]
P05107	ITGB2	A_23_P329573	10.47	Homo sapiens integrin, beta 2 (antigen CD18 (p95), lymphocyte function-associated antigen 1; macrophage antigen 1 (mac-1) beta subunit) (ITGB2), mRNA [NM_000211]
P05109	S100A8	A_23_P434809	6.626	Homo sapiens S100 calcium binding protein A8 (calgranulin A) (S100A8), mRNA [NM_002964]
P05120	SERPINB2	A_23_P153185	0.271	Homo sapiens serine (or cysteine) proteinase inhibitor, clade B (ovalbumin), member 2, mRNA (cDNA clone MGC:13616 IMAGE:4281085), complete cds. [BC012609]
P05164	MPO	A_23_P141173	0.465	Homo sapiens myeloperoxidase (MPO), nuclear gene encoding mitochondrial protein, mRNA [NM_000250]
P05166	PCCB	A_24_P302797, A_24_P302802	0.2835	Homo sapiens propionyl Coenzyme A carboxylase, beta polypeptide (PCCB), mRNA [NM_000532]
P05198	EIF2S1	A_24_P138556	0.374	Homo sapiens eukaryotic translation initiation factor 2, subunit 1 alpha, 35kDa (EIF2S1), mRNA [NM_004094]
P05412	JUN	A_23_P201538	0.452	Homo sapiens v-jun sarcoma virus 17 oncogene homolog (avian) (JUN), mRNA [NM_002228]
P05452	CLEC3B	A_23_P69497	0.435	Homo sapiens C-type lectin domain family 3, member B (CLEC3B), mRNA [NM_003278]
P05455	SSB	A_23_P154025	0.446	Homo sapiens Sjogren syndrome antigen B (autoantigen La) (SSB), mRNA [NM_003142]
P05496	ATP5G1	A_23_P164228	0.457	Homo sapiens ATP synthase, H+ transporting, mitochondrial F0 complex, subunit c (subunit 9), isoform 1 (ATP5G1), nuclear gene encoding mitochondrial protein, transcript variant 1, mRNA [NM_005175]
P05783	KRT18	A_32_P151544	3.135	Homo sapiens keratin 18 (KRT18), transcript variant 1, mRNA [NM_000224]
P06213	INSR	A_23_P4764	0.25	Homo sapiens insulin receptor (INSR), mRNA [NM_000208]
P06396	GSN	A_23_P255884	5.279	Homo sapiens gelsolin (amyloidosis, Finnish type) (GSN), transcript variant 2, mRNA [NM_198252]
P06454	PTMA	A_24_P34632	0.475	Homo sapiens prothymosin, alpha (gene sequence 28) (PTMA), mRNA [NM_002823]
P06703	S100A6	A_23_P201711	2.293	Homo sapiens S100 calcium binding protein A6 (calcyclin) (S100A6), mRNA [NM_014624]
P06733	ENO1	A_23_P137391, A_24_P105501	0.4765	Homo sapiens enolase 1, (alpha) (ENO1), mRNA [NM_001428]
P06748	NPM1	A_24_P188941	0.355	Homo sapiens nucleophosmin (nucleolar phosphoprotein B23, numatrin) (NPM1), mRNA [NM_002520]
P06756	ITGAV	A_23_P50907	2.258	Homo sapiens integrin, alpha V (vitronectin receptor, alpha polypeptide, antigen CD51) (ITGAV), mRNA [NM_002210]
P06858	LPL	A_23_P146233	0.268	Homo sapiens lipoprotein lipase (LPL), mRNA [NM_000237]
P07195	LDHB	A_23_P53476	0.439	Homo sapiens lactate dehydrogenase B (LDHB), mRNA [NM_002300]
P07339	CTSD	A_23_P52556	4.168	Homo sapiens cathepsin D (lysosomal aspartyl protease) (CTSD), mRNA [NM_001909]
P07550	ADRB2	A_23_P145024	0.267	Homo sapiens adrenergic, beta-2-, receptor, surface (ADRB2), mRNA [NM_000024]
P07711	CTSL	A_23_P94533	0.313	Homo sapiens cathepsin L (CTSL), transcript variant 1, mRNA [NM_001912]
P07814	EPRS	A_23_P97632	0.431	Homo sapiens glutamyl-prolyl-tRNA synthetase (EPRS), mRNA [NM_004446]
P07900	HSP90AA1	A_23_P162874	0.349	Homo sapiens heat shock 90kDa protein 1, alpha (HSPCA), transcript variant 2, mRNA [NM_005348]
P07948	LYN	A_23_P147431	3.844	Homo sapiens v-yes-1 Yamaguchi sarcoma viral related oncogene homolog (LYN), mRNA [NM_002350]
P07949	RET	A_23_P202245	0.275	Human papillary thyroid carcinoma-encoded protein mRNA, complete cds. [M31213]
P07954	FH	A_23_P34733	0.479	Homo sapiens fumarate hydratase (FH), nuclear gene encoding mitochondrial protein, mRNA [NM_000143]
P07996	THBS1	A_24_P142118	2.209	Homo sapiens thrombospondin 1 (THBS1), mRNA [NM_003246]
P08133	ANXA6	A_23_P357104	6.491	Homo sapiens annexin A6 (ANXA6), transcript variant 1, mRNA [NM_001155]
P08236	GUSB	A_23_P334608	2.147	Homo sapiens glucuronidase, beta (GUSB), mRNA [NM_000181]
P08237	PFKM	A_24_P98914	0.369	Homo sapiens phosphofructokinase, muscle (PFKM), mRNA [NM_000289]
P08238	HSP90AB1	A_24_P170295	0.313	Homo sapiens heat shock 90kDa protein 1, beta (HSPCB), mRNA [NM_007355]
P08243	ASNS	A_23_P145694	0.148	Homo sapiens asparagine synthetase (ASNS), transcript variant 2, mRNA [NM_001673]
P08246	ELANE	A_23_P130961	0.191	Homo sapiens elastase 2, neutrophil (ELA2), mRNA [NM_001972]
P08311	CTSG	A_23_P140384	0.348	Homo sapiens cathepsin G (CTSG), mRNA [NM_001911]
P08567	PLEK	A_23_P209678	8.222	Homo sapiens pleckstrin (PLEK), mRNA [NM_002664]
P08575		A_23_P125451	6.546	Homo sapiens protein tyrosine phosphatase, receptor type, C (PTPRC), transcript variant 1, mRNA [NM_002838]
P08631	HCK	A_24_P365526	8.139	Homo sapiens hemopoietic cell kinase (HCK), mRNA [NM_002110]
P08670	VIM	A_23_P161194	0.0521	Homo sapiens vimentin (VIM), mRNA [NM_003380]
P08910	ABHD2	A_23_P395172	2.222	Homo sapiens cDNA FLJ38366 fis, clone FEBRA2001134. [AK095685]
P08949	NMB	A_23_P88522	0.451	Homo sapiens neuromedin B (NMB), transcript variant 1, mRNA [NM_021077]
P08962	CD63	A_23_P139476, A_24_P270144	2.886	Homo sapiens CD63 antigen (melanoma 1 antigen) (CD63), mRNA [NM_001780]
P09001	MRPL3	A_23_P18422	0.478	Homo sapiens mitochondrial ribosomal protein L3 (MRPL3), nuclear gene encoding mitochondrial protein, mRNA [NM_007208]
P09110	ACAA1	A_23_P69339	2.167	Homo sapiens acetyl-Coenzyme A acyltransferase 1 (peroxisomal 3-oxoacyl-Coenzyme A thiolase) (ACAA1), nuclear gene encoding mitochondrial protein, mRNA [NM_001607]
P09326	CD48	A_23_P74145, A_32_P175934	2.6505	Homo sapiens CD48 antigen (B-cell membrane protein) (CD48), mRNA [NM_001778]
P09382	LGALS1	A_23_P166459	3.485	Homo sapiens lectin, galactoside-binding, soluble, 1 (galectin 1) (LGALS1), mRNA [NM_002305]
P09467	FBP1	A_23_P257111	3.947	Homo sapiens fructose-1,6-bisphosphatase 1 (FBP1), mRNA [NM_000507]
P09769	FGR	A_23_P103932	33.41	Homo sapiens Gardner-Rasheed feline sarcoma viral (v-fgr) oncogene homolog (FGR), mRNA [NM_005248]
P09874	PARP1	A_23_P114783	0.477	Homo sapiens poly (ADP-ribose) polymerase family, member 1 (PARP1), mRNA [NM_001618]
P09912	IFI6	A_23_P201459	4.221	Homo sapiens interferon, alpha-inducible protein (clone IFI-6-16) (G1P3), transcript variant 3, mRNA [NM_022873]
P09917	ALOX5	A_23_P104464	9.259	Homo sapiens arachidonate 5-lipoxygenase (ALOX5), mRNA [NM_000698]
P09936	UCHL1	A_23_P132956	0.052	Homo sapiens ubiquitin carboxyl-terminal esterase L1 (ubiquitin thiolesterase) (UCHL1), mRNA [NM_004181]
P0C5J1	FAM86B2	A_24_P280868	0.321	Homo sapiens hypothetical protein MGC16279 (MGC16279), mRNA [NM_032916]
P0C7X2	ZNF688	A_23_P141044	2.149	Homo sapiens zinc finger protein 688 (ZNF688), mRNA [NM_145271]
P10145	CXCL8	A_32_P87013	5.742	Homo sapiens interleukin 8 (IL8), mRNA [NM_000584]
P10153	RNASE2	A_23_P151637, A_23_P163025	0.2235	Homo sapiens ribonuclease, RNase A family, 2 (liver, eosinophil-derived neurotoxin) (RNASE2), mRNA [NM_002934],Homo sapiens ribonuclease, RNase A family, 3 (eosinophil cationic protein) (RNASE3), mRNA [NM_002935]
P10242	MYB	A_23_P31073	0.373	Homo sapiens v-myb myeloblastosis viral oncogene homolog (avian) (MYB), mRNA [NM_005375]
P10275	AR	A_23_P113111	0.26	Homo sapiens androgen receptor (dihydrotestosterone receptor; testicular feminization; spinal and bulbar muscular atrophy; Kennedy disease) (AR), transcript variant 1, mRNA [NM_000044]
P10415	BCL2	A_23_P352266	0.196	Homo sapiens B-cell CLL/lymphoma 2 (BCL2), nuclear gene encoding mitochondrial protein, transcript variant alpha, mRNA [NM_000633]
P10515	DLAT	A_24_P372672	0.472	Homo sapiens dihydrolipoamide S-acetyltransferase (E2 component of pyruvate dehydrogenase complex) (DLAT), mRNA [NM_001931]
P10586	PTPRF	A_24_P385313	0.0911	Homo sapiens protein tyrosine phosphatase, receptor type, F (PTPRF), transcript variant 1, mRNA [NM_002840]
P10599	TXN	A_24_P175519	0.414	Homo sapiens thioredoxin (TXN), mRNA [NM_003329]
P10619	CTSA	A_24_P74371, A_24_P74374	2.068	Homo sapiens protective protein for beta-galactosidase (galactosialidosis) (PPGB), mRNA [NM_000308]
P10620	MGST1	A_23_P36658	0.464	Homo sapiens microsomal glutathione S-transferase 1 (MGST1), transcript variant 1c, mRNA [NM_145791]
P10644	PRKAR1A	A_23_P433753, A_24_P356592	2.532	Homo sapiens protein kinase, cAMP-dependent, regulatory, type I, alpha (tissue specific extinguisher 1) (PRKAR1A), transcript variant 3, mRNA [NM_212472]
P10721	KIT	A_23_P110253	2.746	Homo sapiens v-kit Hardy-Zuckerman 4 feline sarcoma viral oncogene homolog (KIT), mRNA [NM_000222]
P10809	HSPD1	A_32_P25273, A_32_P76091	0.3145	Homo sapiens heat shock 60kDa protein 1 (chaperonin) (HSPD1), nuclear gene encoding mitochondrial protein, transcript variant 1, mRNA [NM_002156]
P10914	IRF1	A_23_P41765	2.386	Homo sapiens interferon regulatory factor 1 (IRF1), mRNA [NM_002198]
P11142	HSPA8	A_23_P24594, A_32_P13728	0.4625	Homo sapiens heat shock 70kDa protein 8 (HSPA8), transcript variant 1, mRNA [NM_006597]
P11233	RALA	A_23_P168479	0.466	Homo sapiens v-ral simian leukemia viral oncogene homolog A (ras related) (RALA), mRNA [NM_005402]
P11309	PIM1	A_23_P345118	10.32	Homo sapiens pim-1 oncogene (PIM1), mRNA [NM_002648]
P11473	VDR	A_23_P162589	0.201	Homo sapiens vitamin D (1,25- dihydroxyvitamin D3) receptor (VDR), transcript variant 2, mRNA [NM_001017535]
P11717	IGF2R	A_23_P334021	2.197	Homo sapiens insulin-like growth factor 2 receptor (IGF2R), mRNA [NM_000876]
P11908	PRPS2	A_23_P96641	0.498	Homo sapiens phosphoribosyl pyrophosphate synthetase 2 (PRPS2), mRNA [NM_002765]
P11926	ODC1	A_23_P165840	0.226	Homo sapiens ornithine decarboxylase 1 (ODC1), mRNA [NM_002539]
P12235	SLC25A4	A_24_P206047	0.329	Homo sapiens solute carrier family 25 (mitochondrial carrier; adenine nucleotide translocator), member 4 (SLC25A4), nuclear gene encoding mitochondrial protein, mRNA [NM_001151]
P12724	RNASE3	A_23_P163025	0.193	Homo sapiens ribonuclease, RNase A family, 3 (eosinophil cationic protein) (RNASE3), mRNA [NM_002935]
P13051	UNG	A_24_P398585	0.399	Homo sapiens uracil-DNA glycosylase (UNG), nuclear gene encoding mitochondrial protein, transcript variant 1, mRNA [NM_003362]
P13164	IFITM1	A_23_P72737	4.11	Homo sapiens interferon induced transmembrane protein 1 (9-27) (IFITM1), mRNA [NM_003641]
P13196	ALAS1	A_23_P57877, A_24_P191588	2.0605	Homo sapiens aminolevulinate, delta-, synthase 1 (ALAS1), transcript variant 1, mRNA [NM_000688]
P13236	CCL4	A_23_P207564	3.459	Homo sapiens chemokine (C-C motif) ligand 4 (CCL4), mRNA [NM_002984]
P13498	CYBA	A_23_P163506	2.336	Homo sapiens cytochrome b-245, alpha polypeptide (CYBA), mRNA [NM_000101]
P13500	CCL2	A_23_P89431	42.69	Homo sapiens chemokine (C-C motif) ligand 2 (CCL2), mRNA [NM_002982]
P13501	CCL5	A_23_P152838	3.579	Homo sapiens chemokine (C-C motif) ligand 5 (CCL5), mRNA [NM_002985]
P13598	ICAM2	A_23_P152655	0.42	Homo sapiens intercellular adhesion molecule 2 (ICAM2), mRNA [NM_000873]
P13686	ACP5	A_23_P142075	14.36	Homo sapiens acid phosphatase 5, tartrate resistant (ACP5), mRNA [NM_001611]
P13725	OSM	A_23_P166408	0.0824	Homo sapiens oncostatin M (OSM), mRNA [NM_020530]
P13727	PRG2	A_23_P218002	0.0628	Homo sapiens proteoglycan 2, bone marrow (natural killer cell activator, eosinophil granule major basic protein) (PRG2), mRNA [NM_002728]
P13928	ANXA8	A_32_P105549	0.232	Homo sapiens annexin A8 (ANXA8), mRNA [NM_001630]
P13995	MTHFD2	A_23_P120316	0.429	Homo sapiens methylenetetrahydrofolate dehydrogenase (NADP+ dependent) 2, methenyltetrahydrofolate cyclohydrolase (MTHFD2), nuclear gene encoding mitochondrial protein, mRNA [NM_006636]
P14174	MIF	A_23_P91619	0.365	Homo sapiens macrophage migration inhibitory factor (glycosylation-inhibiting factor) (MIF), mRNA [NM_002415]
P14316	IRF2	A_23_P136478	2.273	Homo sapiens interferon regulatory factor 2 (IRF2), mRNA [NM_002199]
P14598	NCF1	A_32_P116203	33.66	Homo sapiens neutrophil cytosolic factor 1 (47kDa, chronic granulomatous disease, autosomal 1) (NCF1), mRNA [NM_000265]
P14621	ACYP2	A_23_P256988, A_24_P336848	2.5335	Homo sapiens acylphosphatase 2, muscle type (ACYP2), mRNA [NM_138448]
P14625	HSP90B1	A_23_P2601, A_24_P150361	0.465	Homo sapiens tumor rejection antigen (gp96) 1 (TRA1), mRNA [NM_003299]
P14735	IDE	A_23_P63681, A_32_P19460	0.328	Homo sapiens insulin-degrading enzyme (IDE), mRNA [NM_004969],Q6IK74 (Q6IK74) HDC13250, partial (9%) [THC2378360]
P15121	AKR1B1	A_23_P258190	0.393	Homo sapiens aldo-keto reductase family 1, member B1 (aldose reductase) (AKR1B1), mRNA [NM_001628]
P15153	RAC2	A_23_P218770	2.104	Homo sapiens ras-related C3 botulinum toxin substrate 2 (rho family, small GTP binding protein Rac2) (RAC2), mRNA [NM_002872]
P15170	GSPT1	A_24_P73669	0.376	Homo sapiens G1 to S phase transition 1 (GSPT1), mRNA [NM_002094]
P15289	ARSA	A_23_P255436	3.167	Homo sapiens arylsulfatase A (ARSA), mRNA [NM_000487]
P15291	B4GALT1	A_24_P103803	3.72	Homo sapiens UDP-Gal:betaGlcNAc beta 1,4- galactosyltransferase, polypeptide 1 (B4GALT1), mRNA [NM_001497]
P15309	ACPP	A_24_P46130	2.264	Homo sapiens acid phosphatase, prostate (ACPP), mRNA [NM_001099]
P15311	EZR	A_23_P19590, A_24_P290481	0.324	Homo sapiens villin 2 (ezrin) (VIL2), mRNA [NM_003379]
P15408	FOSL2	A_23_P343671	0.302	Homo sapiens mRNA; cDNA DKFZp686E0486 (from clone DKFZp686E0486). [BX647822]
P15498	VAV1	A_23_P38959	2.691	Homo sapiens vav 1 oncogene (VAV1), mRNA [NM_005428]
P15529	CD46	A_23_P201758	2.272	Homo sapiens membrane cofactor protein (CD46, trophoblast-lymphocyte cross-reactive antigen) (MCP), transcript variant a, mRNA [NM_002389]
P15531	NME1	A_23_P152804	0.488	Homo sapiens non-metastatic cells 1, protein (NM23A) expressed in (NME1), transcript variant 1, mRNA [NM_198175]
P15814	IGLL1	A_23_P120812, A_24_P83102	0.279	Homo sapiens immunoglobulin lambda-like polypeptide 1 (IGLL1), transcript variant 1, mRNA [NM_020070]
P15907	ST6GAL1	A_24_P388528	0.296	Homo sapiens ST6 beta-galactosamide alpha-2,6-sialyltranferase 1 (ST6GAL1), transcript variant 1, mRNA [NM_173216]
P15923	TCF3	A_23_P67708, A_24_P367397	0.4225	Homo sapiens transcription factor 3 (E2A immunoglobulin enhancer binding factors E12/E47) (TCF3), mRNA [NM_003200]
P16035	TIMP2	A_23_P107401	6.358	Homo sapiens tissue inhibitor of metalloproteinase 2 (TIMP2), mRNA [NM_003255]
P16070	CD44	A_23_P24870	0.276	Homo sapiens CD44 antigen (homing function and Indian blood group system) (CD44), transcript variant 1, mRNA [NM_000610]
P16383	GCFC2	A_23_P120062	0.324	Homo sapiens chromosome 2 open reading frame 3 (C2orf3), mRNA [NM_003203]
P16403	HIST1H1C	A_23_P122443	2.575	Homo sapiens histone 1, H1c (HIST1H1C), mRNA [NM_005319]
P16435	POR	A_24_P29723	9.971	Homo sapiens P450 (cytochrome) oxidoreductase (POR), mRNA [NM_000941]
P16989	YBX3	A_23_P25224	0.459	Homo sapiens cold shock domain protein A (CSDA), mRNA [NM_003651]
P17026	ZNF22	A_23_P384512	0.423	Homo sapiens zinc finger protein 22 (KOX 15) (ZNF22), mRNA [NM_006963]
P17039	ZNF30	A_32_P203430	0.344	Homo sapiens zinc finger protein 30 (KOX 28) (ZNF30), mRNA [NM_194325]
P17081	RHOQ	A_32_P70273	2.274	Homo sapiens ras homolog gene family, member Q (RHOQ), mRNA [NM_012249]
P17152	TMEM11	A_23_P107036	3.326	Homo sapiens chromosome 17 open reading frame 35 (C17orf35), mRNA [NM_003876]
P17252	PRKCA	A_24_P916496	2.143	Homo sapiens protein kinase C, alpha (PRKCA), mRNA [NM_002737]
P17655	CAPN2	A_23_P23924	0.142	Homo sapiens calpain 2, (m/II) large subunit (CAPN2), mRNA [NM_001748]
P17676	CEBPB	A_23_P143242, A_23_P411296	5.946	Homo sapiens CCAAT/enhancer binding protein (C/EBP), beta (CEBPB), mRNA [NM_005194]
P17787	CHRNB2	A_23_P368624	2.035	Homo sapiens cholinergic receptor, nicotinic, beta polypeptide 2 (neuronal) (CHRNB2), mRNA [NM_000748]
P17900	GM2A	A_24_P925314	4.591	Homo sapiens cDNA FLJ46017 fis, clone SPLEN2016139. [AK127910]
P18206	VCL	A_24_P47182	2.49	Homo sapiens vinculin (VCL), transcript variant 1, mRNA [NM_014000]
P18754	RCC1	A_23_P46309	0.423	Homo sapiens regulator of chromosome condensation 1 (RCC1), mRNA [NM_001269]
P19086	GNAZ	A_23_P211363	2.087	Homo sapiens guanine nucleotide binding protein (G protein), alpha z polypeptide (GNAZ), mRNA [NM_002073]
P19338	NCL	A_23_P5551	0.375	Homo sapiens nucleolin (NCL), mRNA [NM_005381]
P19367	HK1	A_23_P217958	3.544	Homo sapiens hexokinase 1 (HK1), nuclear gene encoding mitochondrial protein, transcript variant 5, mRNA [NM_033500]
P19397	CD53	A_23_P74547	4.692	Homo sapiens CD53 antigen (CD53), mRNA [NM_000560]
P19484	TFEB	A_23_P368729	9.154	Homo sapiens transcription factor EB (TFEB), mRNA [NM_007162]
P19544	WT1	A_23_P116280	0.0599	Homo sapiens Wilms tumor 1 (WT1), transcript variant B, mRNA [NM_024424]
P19793	RXRA	A_23_P219176	0.467	Homo sapiens retinoid X receptor, alpha (RXRA), mRNA [NM_002957]
P20292	ALOX5AP	A_23_P2793, A_24_P347378	8.082	Homo sapiens arachidonate 5-lipoxygenase-activating protein (ALOX5AP), mRNA [NM_001629]
P20671	HIST1H2AD	A_23_P428184	2.167	Homo sapiens histone 1, H2ad (HIST1H2AD), mRNA [NM_021065]
P20749	BCL3	A_23_P4662	2.077	Homo sapiens B-cell CLL/lymphoma 3 (BCL3), mRNA [NM_005178]
P21266	GSTM3	A_23_P12343	4.252	Homo sapiens glutathione S-transferase M3 (brain) (GSTM3), mRNA [NM_000849]
P21281	ATP6V1B2	A_23_P31844	3.781	Homo sapiens ATPase, H+ transporting, lysosomal 56/58kDa, V1 subunit B, isoform 2 (ATP6V1B2), mRNA [NM_001693]
P21333	FLNA	A_23_P96568	0.444	Homo sapiens filamin A, alpha (actin binding protein 280) (FLNA), mRNA [NM_001456]
P21673	SAT1	A_23_P137016, A_23_P378722	5.1515	Homo sapiens spermidine/spermine N1-acetyltransferase (SAT), mRNA [NM_002970]
P21796	VDAC1	A_23_P144816	0.481	Homo sapiens voltage-dependent anion channel 1 (VDAC1), mRNA [NM_003374]
P21953	BCKDHB	A_23_P93464, A_24_P239664	0.4435	Homo sapiens branched chain keto acid dehydrogenase E1, beta polypeptide (maple syrup urine disease) (BCKDHB), nuclear gene encoding mitochondrial protein, transcript variant 1, mRNA [NM_183050],Homo sapiens branched chain keto acid dehydrogenase E1, bet
P22087	FBL	A_23_P78892	0.443	Homo sapiens fibrillarin (FBL), mRNA [NM_001436]
P22102	GART	A_23_P80098, A_24_P239140, A_24_P301846	0.385333	Homo sapiens phosphoribosylglycinamide formyltransferase, phosphoribosylglycinamide synthetase, phosphoribosylaminoimidazole synthetase (GART), transcript variant 1, mRNA [NM_000819],Homo sapiens phosphoribosylglycinamide formyltransferase, phosphoribosy
P22234	PAICS	A_23_P41280, A_24_P200427	0.3255	Homo sapiens phosphoribosylaminoimidazole carboxylase, phosphoribosylaminoimidazole succinocarboxamide synthetase (PAICS), mRNA [NM_006452]
P22392	NME1-NME2	A_23_P141405	0.484	Homo sapiens non-metastatic cells 2, protein (NM23B) expressed in (NME2), transcript variant 2, mRNA [NM_002512]
P22466	GAL	A_23_P374844	0.085	Homo sapiens galanin (GAL), mRNA [NM_015973]
P22681	CBL	A_23_P339191	2.35	Homo sapiens Cas-Br-M (murine) ecotropic retroviral transforming sequence (CBL), mRNA [NM_005188]
P22732	SLC2A5	A_23_P160159	13.83	Homo sapiens solute carrier family 2 (facilitated glucose/fructose transporter), member 5 (SLC2A5), mRNA [NM_003039]
P22794	EVI2A	A_23_P78092	3.226	Homo sapiens ecotropic viral integration site 2A (EVI2A), transcript variant 1, mRNA [NM_001003927]
P23219	PTGS1	A_23_P216966, A_24_P64167	8.585	Homo sapiens prostaglandin-endoperoxide synthase 1 (prostaglandin G/H synthase and cyclooxygenase) (PTGS1), transcript variant 1, mRNA [NM_000962]
P23434	GCSH	A_23_P117933, A_32_P57702	0.2595	GCSH_HUMAN (P23434) Glycine cleavage system H protein, mitochondrial precursor, partial (80%) [THC2304000],Homo sapiens glycine cleavage system protein H (aminomethyl carrier) (GCSH), mRNA [NM_004483]
P23469	PTPRE	A_23_P138495, A_24_P213494	2.4805	Homo sapiens protein tyrosine phosphatase, receptor type, E (PTPRE), transcript variant 1, mRNA [NM_006504]
P23526	AHCY	A_24_P57367	0.478	Homo sapiens S-adenosylhomocysteine hydrolase (AHCY), mRNA [NM_000687]
P23527	HIST1H2BO	A_23_P59069	3.257	Homo sapiens histone 1, H2bo (HIST1H2BO), mRNA [NM_003527]
P23634	ATP2B4	A_24_P405205	4.893	Homo sapiens ATPase, Ca++ transporting, plasma membrane 4 (ATP2B4), transcript variant 1, mRNA [NM_001001396]
P23769	GATA2	A_23_P110022	0.153	Homo sapiens GATA binding protein 2 (GATA2), mRNA [NM_032638]
P24158	PRTN3	A_23_P142345	0.12	Homo sapiens proteinase 3 (serine proteinase, neutrophil, Wegener granulomatosis autoantigen) (PRTN3), mRNA [NM_002777]
P24394	IL4R	A_23_P129556	3.579	Homo sapiens interleukin 4 receptor (IL4R), transcript variant 1, mRNA [NM_000418]
P24468	NR2F2	A_23_P88589, A_24_P313354	0.369	Homo sapiens nuclear receptor subfamily 2, group F, member 2 (NR2F2), mRNA [NM_021005]
P24557	TBXAS1	A_24_P274814	2.977	Homo sapiens thromboxane A synthase 1 (platelet, cytochrome P450, family 5, subfamily A) (TBXAS1), transcript variant TXS-II, mRNA [NM_030984]
P25025	CXCR2	A_23_P135755	2.136	Homo sapiens interleukin 8 receptor, beta (IL8RB), mRNA [NM_001557]
P25686	DNAJB2	A_24_P102981	6.733	Homo sapiens DnaJ (Hsp40) homolog, subfamily B, member 2 (DNAJB2), mRNA [NM_006736]
P26010	ITGB7	A_23_P76529	11.12	Homo sapiens integrin, beta 7 (ITGB7), mRNA [NM_000889]
P26374	CHML	A_23_P46118, A_24_P712350	0.353	Homo sapiens choroideremia-like (Rab escort protein 2) (CHML), mRNA [NM_001821]
P26447	S100A4	A_23_P94800	2.129	Homo sapiens S100 calcium binding protein A4 (calcium protein, calvasculin, metastasin, murine placental homolog) (S100A4), transcript variant 1, mRNA [NM_002961]
P26572	MGAT1	A_23_P58482	2.019	Homo sapiens mannosyl (alpha-1,3-)-glycoprotein beta-1,2-N-acetylglucosaminyltransferase (MGAT1), mRNA [NM_002406]
P26651		A_23_P39237	2.057	Homo sapiens zinc finger protein 36, C3H type, homolog (mouse) (ZFP36), mRNA [NM_003407]
P26927		A_24_P148796	2.426	Homo sapiens macrophage stimulating 1 (hepatocyte growth factor-like) (MST1), mRNA [NM_020998]
P26951	IL3RA	A_32_P217750	3.485	Homo sapiens interleukin 3 receptor, alpha (low affinity) (IL3RA), mRNA [NM_002183]
P27144	AK4	A_32_P108655	0.202	Homo sapiens adenylate kinase 3-like 1 (AK3L1), nuclear gene encoding mitochondrial protein, transcript variant 1, mRNA [NM_001005353]
P27797	CALR	A_23_P67288	0.243	Homo sapiens calreticulin (CALR), mRNA [NM_004343]
P27816	MAP4	A_23_P211816	0.447	Homo sapiens microtubule-associated protein 4 (MAP4), transcript variant 1, mRNA [NM_002375]
P27918	CFP	A_23_P22444	15.81	Homo sapiens properdin P factor, complement (PFC), mRNA [NM_002621]
P27987	ITPKB	A_23_P372255	2.487	Homo sapiens inositol 1,4,5-trisphosphate 3-kinase B (ITPKB), mRNA [NM_002221]
P28799	GRN	A_23_P49708	3.521	Homo sapiens granulin (GRN), transcript variant 1, mRNA [NM_002087]
P28907	CD38	A_23_P167328	31.05	Homo sapiens CD38 antigen (p45) (CD38), mRNA [NM_001775]
P29275	ADORA2B	A_23_P55477	2.772	Homo sapiens adenosine A2b receptor (ADORA2B), mRNA [NM_000676]
P29350	PTPN6	A_23_P162486	2.498	Homo sapiens protein tyrosine phosphatase, non-receptor type 6 (PTPN6), transcript variant 1, mRNA [NM_002831]
P30086	PEBP1	A_23_P13604	0.419	Homo sapiens prostatic binding protein (PBP), mRNA [NM_002567]
P30273	FCER1G	A_23_P160849	3.273	Homo sapiens Fc fragment of IgE, high affinity I, receptor for; gamma polypeptide (FCER1G), mRNA [NM_004106]
P30279	CCND2	A_23_P139881, A_24_P270235	0.4345	Homo sapiens cyclin D2 (CCND2), mRNA [NM_001759]
P30281	CCND3	A_23_P361773	3.287	Homo sapiens cyclin D3 (CCND3), mRNA [NM_001760]
P30304	CDC25A	A_24_P397107	0.496	Homo sapiens cell division cycle 25A (CDC25A), transcript variant 1, mRNA [NM_001789]
P30536	TSPO	A_24_P134526	0.403	Homo sapiens benzodiazapine receptor (peripheral) (BZRP), transcript variant PBR-S, mRNA [NM_007311]
P30679	GNA15	A_24_P331128	0.475	Homo sapiens guanine nucleotide binding protein (G protein), alpha 15 (Gq class) (GNA15), mRNA [NM_002068]
P30740	SERPINB1	A_23_P214330, A_24_P269315	5.1985	Homo sapiens serine (or cysteine) proteinase inhibitor, clade B (ovalbumin), member 1 (SERPINB1), mRNA [NM_030666]
P30825	SLC7A1	A_24_P253251	0.436	Homo sapiens solute carrier family 7 (cationic amino acid transporter, y+ system), member 1 (SLC7A1), mRNA [NM_003045]
P31150	GDI1	A_23_P45496	2.052	Homo sapiens GDP dissociation inhibitor 1 (GDI1), mRNA [NM_001493]
P31358	CD52	A_23_P85800	3.301	Homo sapiens CD52 antigen (CAMPATH-1 antigen) (CD52), mRNA [NM_001803]
P31629	HIVEP2	A_23_P214766	5.52	Homo sapiens human immunodeficiency virus type I enhancer binding protein 2 (HIVEP2), mRNA [NM_006734]
P31949	S100A11	A_23_P126593, A_23_P145863	2.9185	Homo sapiens S100 calcium binding protein A11 (calgizzarin) (S100A11), mRNA [NM_005620]
P32121	ARRB2	A_23_P158829	3.608	Homo sapiens arrestin, beta 2 (ARRB2), transcript variant 1, mRNA [NM_004313]
P32246	CCR1	A_24_P148717	21.43	Homo sapiens chemokine (C-C motif) receptor 1 (CCR1), mRNA [NM_001295]
P32248	CCR7	A_23_P343398	0.0967	Homo sapiens chemokine (C-C motif) receptor 7 (CCR7), mRNA [NM_001838]
P32322	PYCR1	A_23_P130194, A_24_P204358	0.3995	Homo sapiens pyrroline-5-carboxylate reductase 1 (PYCR1), transcript variant 1, mRNA [NM_006907],Homo sapiens pyrroline-5-carboxylate reductase 1 (PYCR1), transcript variant 2, mRNA [NM_153824]
P32929	CTH	A_23_P126103	0.455	Homo sapiens cystathionase (cystathionine gamma-lyase) (CTH), transcript variant 1, mRNA [NM_001902]
P33241	LSP1	A_23_P13382	12.11	Homo sapiens lymphocyte-specific protein 1 (LSP1), transcript variant 3, mRNA [NM_001013254]
P33527	ABCC1	A_24_P227831	2.298	Homo sapiens ATP-binding cassette, sub-family C (CFTR/MRP), member 1 (ABCC1), transcript variant 2, mRNA [NM_019862]
P33778	HIST1H2BB	A_23_P111054	2.939	Homo sapiens histone 1, H2bb (HIST1H2BB), mRNA [NM_021062]
P33991	MCM4	A_23_P370989	0.456	Homo sapiens MCM4 minichromosome maintenance deficient 4 (S. cerevisiae) (MCM4), transcript variant 1, mRNA [NM_005914]
P34910	EVI2B	A_23_P66694	2.021	Homo sapiens ecotropic viral integration site 2B (EVI2B), mRNA [NM_006495]
P34972	CNR2	A_23_P310931, A_32_P48054	0.05595	Homo sapiens cannabinoid receptor 2 (macrophage) (CNR2), mRNA [NM_001841],Q8N329 (Q8N329) MGC34132 protein, partial (12%) [THC2284172]
P35219	CA8	A_23_P83838	0.174	Homo sapiens carbonic anhydrase VIII (CA8), mRNA [NM_004056]
P35232	PHB	A_23_P130040, A_24_P262355	0.464	Homo sapiens prohibitin (PHB), mRNA [NM_002634]
P35520	CBS	A_23_P166306	0.353	Homo sapiens cystathionine-beta-synthase (CBS), mRNA [NM_000071]
P35754	GLRX	A_23_P69908	4.352	Homo sapiens glutaredoxin (thioltransferase) (GLRX), mRNA [NM_002064]
P36222	CHI3L1	A_23_P137665	4.009	Homo sapiens chitinase 3-like 1 (cartilage glycoprotein-39) (CHI3L1), mRNA [NM_001276]
P36776	LONP1	A_23_P208469	0.472	Homo sapiens protease, serine, 15 (PRSS15), nuclear gene encoding mitochondrial protein, mRNA [NM_004793]
P36956	SREBF1	A_23_P129786	7.625	Homo sapiens sterol regulatory element binding transcription factor 1 (SREBF1), transcript variant 1, mRNA [NM_001005291]
P37173	TGFBR2	A_23_P211957	3.826	Homo sapiens transforming growth factor, beta receptor II (70/80kDa) (TGFBR2), transcript variant 1, mRNA [NM_001024847]
P38571	LIPA	A_23_P97860	0.42	Homo sapiens lipase A, lysosomal acid, cholesterol esterase (Wolman disease) (LIPA), mRNA [NM_000235]
P38646	HSPA9	A_24_P77676	0.445	Homo sapiens heat shock 70kDa protein 9B (mortalin-2) (HSPA9B), nuclear gene encoding mitochondrial protein, mRNA [NM_004134]
P40121	CAPG	A_23_P165636	4.529	Homo sapiens capping protein (actin filament), gelsolin-like (CAPG), mRNA [NM_001747]
P40425	PBX2	A_23_P214658	2.347	Homo sapiens pre-B-cell leukemia transcription factor 2 (PBX2), mRNA [NM_002586]
P40617	ARL4A	A_23_P145761	0.233	Homo sapiens ADP-ribosylation factor-like 4 (ARL4), transcript variant 1, mRNA [NM_005738]
P40938	RFC3	A_23_P14193	0.437	Homo sapiens replication factor C (activator 1) 3, 38kDa (RFC3), transcript variant 1, mRNA [NM_002915]
P41134	ID1	A_23_P252306	0.454	Homo sapiens inhibitor of DNA binding 1, dominant negative helix-loop-helix protein (ID1), transcript variant 1, mRNA [NM_002165]
P41220	RGS2	A_23_P114947	10.71	Homo sapiens regulator of G-protein signalling 2, 24kDa (RGS2), mRNA [NM_002923]
P41226	UBA7	A_23_P21207	4.245	Homo sapiens ubiquitin-activating enzyme E1-like (UBE1L), mRNA [NM_003335]
P41231	P2RY2	A_23_P24903	0.41	Homo sapiens purinergic receptor P2Y, G-protein coupled, 2 (P2RY2), transcript variant 1, mRNA [NM_176072]
P41252	IARS	A_23_P258964	0.415	Homo sapiens isoleucine-tRNA synthetase (IARS), transcript variant long, mRNA [NM_013417]
P41597	CCR2	A_23_P212354	24.71	Homo sapiens chemokine (C-C motif) receptor 2 (CCR2), transcript variant A, mRNA [NM_000647]
P42331	ARHGAP25	A_23_P142974	2.168	Homo sapiens Rho GTPase activating protein 25 (ARHGAP25), transcript variant 1, mRNA [NM_001007231]
P42679	MATK	A_23_P50678	0.374	Homo sapiens megakaryocyte-associated tyrosine kinase (MATK), transcript variant 3, mRNA [NM_139354]
P42704	LRPPRC	A_24_P26073	0.46	Homo sapiens leucine-rich PPR-motif containing (LRPPRC), mRNA [NM_133259]
P42768	WAS	A_23_P96331	2.132	Homo sapiens Wiskott-Aldrich syndrome (eczema-thrombocytopenia) (WAS), mRNA [NM_000377]
P42785	PRCP	A_23_P127964	3.072	Homo sapiens prolylcarboxypeptidase (angiotensinase C) (PRCP), transcript variant 2, mRNA [NM_199418]
P43007	SLC1A4	A_23_P91151	0.468	Homo sapiens solute carrier family 1 (glutamate/neutral amino acid transporter), member 4 (SLC1A4), mRNA [NM_003038]
P43487	RANBP1	A_23_P91590	0.407	Homo sapiens RAN binding protein 1 (RANBP1), mRNA [NM_002882]
P43490	NAMPT	A_23_P305060, A_24_P408772, A_32_P79396	0.465667	Homo sapiens pre-B-cell colony enhancing factor 1 (PBEF1), transcript variant 1, mRNA [NM_005746],Homo sapiens pre-B-cell colony enhancing factor 1 (PBEF1), transcript variant 2, mRNA [NM_182790]
P46087	NOP2	A_23_P204364	0.486	Homo sapiens nucleolar protein 1, 120kDa (NOL1), mRNA [NM_006170]
P46939	UTRN	A_32_P524014	2.175	Homo sapiens cDNA FLJ13613 fis, clone PLACE1010856. [AK023675]
P48060	GLIPR1	A_23_P364024, A_24_P390096	4.4225	Homo sapiens GLI pathogenesis-related 1 (glioma) (GLIPR1), mRNA [NM_006851],Homo sapiens glioma pathogenesis-related protein (GliPR) mRNA, complete cds. [U16307]
P48163	ME1	A_23_P422026	0.195	Homo sapiens malic enzyme 1, NADP(+)-dependent, cytosolic (ME1), mRNA [NM_002395]
P48507	GCLM	A_23_P103996, A_32_P177953	0.226	Homo sapiens glutamate-cysteine ligase, modifier subunit (GCLM), mRNA [NM_002061],full-length cDNA clone CS0CAP007YJ17 of Thymus of Homo sapiens (human). [CR598364]
P48595	SERPINB10	A_23_P313981	0.0845	Homo sapiens serine (or cysteine) proteinase inhibitor, clade B (ovalbumin), member 10 (SERPINB10), mRNA [NM_005024]
P48643	CCT5	A_23_P257863	0.46	Homo sapiens chaperonin containing TCP1, subunit 5 (epsilon) (CCT5), mRNA [NM_012073]
P48736	PIK3CG	A_24_P637651	10.01	Phosphatidylinositol 4,5-bisphosphate 3-kinase catalytic subunit gamma isoform
P48739	PITPNB	A_23_P17786	0.414	Homo sapiens phosphatidylinositol transfer protein, beta (PITPNB), mRNA [NM_012399]
P48960	ADGRE5	A_23_P502312	2.823	Homo sapiens CD97 antigen (CD97), transcript variant 1, mRNA [NM_078481]
P49005	POLD2	A_23_P71146	0.469	Homo sapiens polymerase (DNA directed), delta 2, regulatory subunit 50kDa (POLD2), mRNA [NM_006230]
P49006	MARCKSL1	A_23_P310	2.491	Homo sapiens MARCKS-like 1 (MARCKSL1), mRNA [NM_023009]
P49137	MAPKAPK2	A_23_P201483, A_23_P350467	3.0155	Homo sapiens mitogen-activated protein kinase-activated protein kinase 2 (MAPKAPK2), transcript variant 1, mRNA [NM_004759]
P49184	DNASE1L1	A_23_P85164	2.843	Homo sapiens deoxyribonuclease I-like 1 (DNASE1L1), transcript variant 1, mRNA [NM_006730]
P49257	LMAN1	A_23_P78342	0.39	Homo sapiens lectin, mannose-binding, 1 (LMAN1), mRNA [NM_005570]
P49368	CCT3	A_23_P160631	0.463	Homo sapiens chaperonin containing TCP1, subunit 3 (gamma) (CCT3), transcript variant 1, mRNA [NM_005998]
P49406	MRPL19	A_23_P102262	0.398	Homo sapiens mitochondrial ribosomal protein L19 (MRPL19), nuclear gene encoding mitochondrial protein, mRNA [NM_014763]
P49619	DGKG	A_23_P40926	0.412	Homo sapiens diacylglycerol kinase, gamma 90kDa (DGKG), mRNA [NM_001346]
P49682	CXCR3	A_23_P114299	2.602	Homo sapiens chemokine (C-X-C motif) receptor 3 (CXCR3), mRNA [NM_001504]
P49716	CEBPD	A_23_P31810	3.19	Homo sapiens CCAAT/enhancer binding protein (C/EBP), delta (CEBPD), mRNA [NM_005195]
P49759	CLK1	A_23_P16817, A_24_P257151	2.2515	Homo sapiens CDC-like kinase 1 (CLK1), transcript variant 1, mRNA [NM_004071]
P49765	VEGFB	A_23_P1594	2.169	Homo sapiens vascular endothelial growth factor B (VEGFB), mRNA [NM_003377]
P49773	HINT1	A_32_P47554	0.455	Homo sapiens histidine triad nucleotide binding protein 1 (HINT1), mRNA [NM_005340]
P49903	SEPHS1	A_23_P150092, A_24_P90022	0.4465	Homo sapiens cDNA clone IMAGE:5548247, partial cds. [BC064610],Homo sapiens selenophosphate synthetase 1 (SEPHS1), mRNA [NM_012247]
P49918	CDKN1C	A_23_P428129	3.347	Homo sapiens cyclin-dependent kinase inhibitor 1C (p57, Kip2) (CDKN1C), mRNA [NM_000076]
P49959	MRE11A	A_23_P150189	0.447	Homo sapiens MRE11 meiotic recombination 11 homolog A (S. cerevisiae) (MRE11A), transcript variant 2, mRNA [NM_005590]
P50226	SULT1A2	A_23_P106773	2.051	Homo sapiens sulfotransferase family, cytosolic, 1A, phenol-preferring, member 2 (SULT1A2), transcript variant 2, mRNA [NM_177528]
P50238	AL928654.7, CRIP1	A_23_P44674	3.279	Homo sapiens cysteine-rich protein 1 (intestinal) (CRIP1), mRNA [NM_001311]
P50552	VASP	A_23_P119102	2.701	Homo sapiens vasodilator-stimulated phosphoprotein (VASP), transcript variant 1, mRNA [NM_003370]
P50579	METAP2	A_24_P141736	0.484	AMP2_HUMAN (P50579) Methionine aminopeptidase 2 (MetAP 2) (Peptidase M 2) (Initiation factor 2 associated 67 kDa glycoprotein) (p67) (p67eIF2) , partial (89%) [THC2336852]
P50991	CCT4	A_23_P102420	0.449	Homo sapiens chaperonin containing TCP1, subunit 4 (delta) (CCT4), mRNA [NM_006430]
P51452	DUSP3	A_23_P129956	0.333	Homo sapiens dual specificity phosphatase 3 (vaccinia virus phosphatase VH1-related) (DUSP3), mRNA [NM_004090]
P51532	SMARCA4	A_24_P212851	0.494	Homo sapiens SWI/SNF related, matrix associated, actin dependent regulator of chromatin, subfamily a, member 4 (SMARCA4), mRNA [NM_003072]
P51649	ALDH5A1	A_24_P115007	0.288	Homo sapiens aldehyde dehydrogenase 5 family, member A1 (succinate-semialdehyde dehydrogenase) (ALDH5A1), nuclear gene encoding mitochondrial protein, transcript variant 1, mRNA [NM_170740]
P51681	CCR5	A_23_P412321	62.71	Homo sapiens chemokine (C-C motif) receptor 5 (CCR5), mRNA [NM_000579]
P51797	CLCN6	A_24_P302374	2.11	Homo sapiens chloride channel 6 (CLCN6), transcript variant ClC-6a, mRNA [NM_001286]
P51808	DYNLT3	A_23_P73577, A_24_P91852	2.116	Homo sapiens t-complex-associated-testis-expressed 1-like (TCTE1L), mRNA [NM_006520],Homo sapiens t-complex-associated-testis-expressed 1-like, mRNA (cDNA clone MGC:5007 IMAGE:3448623), complete cds. [BC000968]
P51815	ZNF75D	A_23_P305938, A_23_P397635	2.116	Homo sapiens zinc finger protein 75 (D8C6) (ZNF75), mRNA [NM_007131]
P51991	HNRNPA3	A_23_P17163, A_24_P488588, A_32_P77502	0.477667	D10S102=FBRNP [human, fetal brain, mRNA, 3043 nt]. [S63912],Homo sapiens heterogeneous nuclear ribonucleoprotein A3 (HNRPA3), mRNA [NM_194247]
P52209	PGD	A_23_P126623	4.033	Homo sapiens phosphogluconate dehydrogenase (PGD), mRNA [NM_002631]
P52298	NCBP2	A_23_P155316	0.448	Homo sapiens nuclear cap binding protein subunit 2, 20kDa (NCBP2), mRNA [NM_007362]
P52429	DGKE	A_32_P540991	0.488	Homo sapiens cDNA FLJ33029 fis, clone THYMU2000162. [AK057591]
P52758	HRSP12	A_23_P134714	0.374	Homo sapiens heat-responsive protein 12 (HRSP12), mRNA [NM_005836]
P52789	HK2	A_23_P398460	0.407	Homo sapiens hexokinase 2 (HK2), mRNA [NM_000189]
P52790	HK3	A_24_P37962	3.356	Homo sapiens hexokinase 3 (white cell) (HK3), nuclear gene encoding mitochondrial protein, mRNA [NM_002115]
P52799	EFNB2	A_24_P355944	0.404	Homo sapiens ephrin-B2 (EFNB2), mRNA [NM_004093]
P52888	THOP1	A_23_P28057	0.496	Homo sapiens thimet oligopeptidase 1 (THOP1), mRNA [NM_003249]
P53004	BLVRA	A_23_P71148	0.284	Homo sapiens biliverdin reductase A (BLVRA), mRNA [NM_000712]
P53985	SLC16A1	A_23_P126825	0.493	Homo sapiens solute carrier family 16 (monocarboxylic acid transporters), member 1 (SLC16A1), mRNA [NM_003051]
P54687	BCAT1	A_24_P935986	0.183	Homo sapiens branched chain aminotransferase 1, cytosolic (BCAT1), mRNA [NM_005504]
P54709	ATP1B3	A_23_P68007	0.443	Homo sapiens ATPase, Na+/K+ transporting, beta 3 polypeptide (ATP1B3), mRNA [NM_001679]
P54803	GALC	A_23_P25964	3.268	Homo sapiens galactosylceramidase (Krabbe disease) (GALC), mRNA [NM_000153]
P54819	AK2	A_24_P179903	0.383	Homo sapiens adenylate kinase 2 (AK2), transcript variant AK2A, mRNA [NM_001625]
P54886	ALDH18A1	A_23_P1361	0.379	Homo sapiens aldehyde dehydrogenase 18 family, member A1 (ALDH18A1), nuclear gene encoding mitochondrial protein, transcript variant 1, mRNA [NM_002860]
P55083	MFAP4	A_23_P164057	0.097	Homo sapiens microfibrillar-associated protein 4 (MFAP4), mRNA [NM_002404]
P55145		A_23_P132793	0.495	Homo sapiens arginine-rich, mutated in early stage tumors (ARMET), mRNA [NM_006010]
P55211	CASP9	A_23_P97309, A_24_P111342	2.51	Homo sapiens caspase 9, apoptosis-related cysteine protease (CASP9), transcript variant alpha, mRNA [NM_001229]
P55273	CDKN2D	A_23_P89941	4.821	Homo sapiens cyclin-dependent kinase inhibitor 2D (p19, inhibits CDK4) (CDKN2D), transcript variant 1, mRNA [NM_001800]
P55345	PRMT2	A_23_P211244, A_23_P211247, A_23_P80156	3.00767	Homo sapiens HMT1 hnRNP methyltransferase-like 1 (S. cerevisiae) (HRMT1L1), transcript variant 1, mRNA [NM_206962]
P55884	EIF3B	A_23_P157072	0.484	Homo sapiens eukaryotic translation initiation factor 3, subunit 9 eta, 116kDa (EIF3S9), transcript variant 1, mRNA [NM_003751]
P56182	RRP1	A_23_P80129, A_23_P80136	0.4015	Homo sapiens DNA segment on chromosome 21 (unique) 2056 expressed sequence (D21S2056E), mRNA [NM_003683]
P56282	POLE2	A_23_P163099	0.42	Homo sapiens polymerase (DNA directed), epsilon 2 (p59 subunit) (POLE2), mRNA [NM_002692]
P56559	ARL4C	A_23_P317620	0.0592	Homo sapiens ADP-ribosylation factor-like 7 (ARL7), mRNA [NM_005737]
P57053	H2BFS	A_23_P145238, A_23_P40470	4.8255	Homo sapiens H2B histone family, member S (H2BFS), mRNA [NM_017445],Homo sapiens histone 1, H2bk (HIST1H2BK), mRNA [NM_080593]
P57081	WDR4	A_23_P143535, A_23_P211302	0.346	Homo sapiens WD repeat domain 4 (WDR4), transcript variant 2, mRNA [NM_033661]
P57088	TMEM33	A_24_P191790	0.45	Homo sapiens transmembrane protein 33 (TMEM33), mRNA [NM_018126]
P57682	KLF3	A_24_P414376	3.002	Krueppel-like factor 3
P58215	LOXL3	A_24_P88763	9.517	Homo sapiens lysyl oxidase-like 3 (LOXL3), mRNA [NM_032603]
P58335	ANTXR2	A_23_P170733	8.798	Homo sapiens anthrax toxin receptor 2 (ANTXR2), mRNA [NM_058172]
P58557	YBEY	A_32_P18547	0.434	Homo sapiens chromosome 21 open reading frame 57 (C21orf57), transcript variant 1, mRNA [NM_058181]
P58876	HIST1H2BD	A_24_P146211	2.217	Homo sapiens histone 1, H2bd (HIST1H2BD), transcript variant 1, mRNA [NM_021063]
P59665	DEFA1, DEFA1B	A_23_P31816	6.023	Homo sapiens defensin, alpha 3, neutrophil-specific (DEFA3), mRNA [NM_005217]
P59666	DEFA3	A_23_P31816	6.023	Homo sapiens defensin, alpha 3, neutrophil-specific (DEFA3), mRNA [NM_005217]
P59768	GNG2	A_32_P208403	77.59	Homo sapiens guanine nucleotide binding protein (G protein), gamma 2 (GNG2), mRNA [NM_053064]
P60604	UBE2G2	A_23_P211179	0.465	Homo sapiens ubiquitin-conjugating enzyme E2G 2 (UBC7 homolog, yeast) (UBE2G2), transcript variant 2, mRNA [NM_182688]
P60900	PSMA6	A_23_P25735	0.412	Homo sapiens proteasome (prosome, macropain) subunit, alpha type, 6 (PSMA6), mRNA [NM_002791]
P60903	S100A10	A_23_P137984	0.331	Homo sapiens S100 calcium binding protein A10 (annexin II ligand, calpactin I, light polypeptide (p11)) (S100A10), mRNA [NM_002966]
P61009	SPCS3	A_23_P132936	0.485	Homo sapiens signal peptidase complex subunit 3 homolog (S. cerevisiae) (SPCS3), mRNA [NM_021928]
P61129	ZC3H6	A_24_P826348, A_32_P46510	4.7095	Homo sapiens cDNA FLJ16526 fis, clone OCBBF2006987. [AK131416],Homo sapiens mRNA for KIAA2035 protein. [AB111887]
P61313	RPL15	A_23_P253200	2.031	Homo sapiens ribosomal protein L15 (RPL15), mRNA [NM_002948]
P61421	ATP6V0D1	A_23_P54636	2.638	Homo sapiens ATPase, H+ transporting, lysosomal 38kDa, V0 subunit d isoform 1 (ATP6V0D1), mRNA [NM_004691]
P61916	NPC2	A_23_P48717	4.843	Homo sapiens Niemann-Pick disease, type C2 (NPC2), mRNA [NM_006432]
P61964	WDR5	A_23_P32558	0.399	Homo sapiens WD repeat domain 5 (WDR5), transcript variant 1, mRNA [NM_017588]
P62079	TSPAN5	A_23_P61886	2.222	Homo sapiens cDNA FLJ31097 fis, clone IMR321000210. [AK055659]
P62306	SNRPF	A_24_P504405	0.441	Homo sapiens small nuclear ribonucleoprotein polypeptide F (SNRPF), mRNA [NM_003095]
P62314	SNRPD1	A_23_P107644, A_32_P148672	0.474	Homo sapiens small nuclear ribonucleoprotein D1 polypeptide 16kDa (SNRPD1), mRNA [NM_006938]
P62324	BTG1	A_23_P87560	7.398	Homo sapiens B-cell translocation gene 1, anti-proliferative (BTG1), mRNA [NM_001731]
P62699	YPEL5	A_23_P108835	5.495	Homo sapiens yippee-like 5 (Drosophila) (YPEL5), mRNA [NM_016061]
P62805	HIST1H4A, HIST1H4B, HIST1H4C, HIST1H4D, HIST1H4E, HIST1H4F, HIST1H4H, HIST1H4I, HIST1H4J, HIST1H4K, HIST1H4L, HIST2H4A, HIST2H4B, HIST4H4	A_23_P214487	0.416	Homo sapiens histone 1, H4c (HIST1H4C), mRNA [NM_003542]
P62807	HIST1H2BC, HIST1H2BE, HIST1H2BF, HIST1H2BG, HIST1H2BI	A_23_P111041, A_23_P167997, A_23_P30776, A_23_P40470, A_23_P42178, A_23_P93180	2.60233	Homo sapiens H2B histone family, member S (H2BFS), mRNA [NM_017445],Homo sapiens histone 1, H2bc (HIST1H2BC), mRNA [NM_003526],Homo sapiens histone 1, H2be (HIST1H2BE), mRNA [NM_003523],Homo sapiens histone 1, H2bf (HIST1H2BF), mRNA [NM_003522],Homo sapi
P62826	RAN	A_32_P506600	0.491	Homo sapiens RAN, member RAS oncogene family (RAN), mRNA [NM_006325]
P63241	EIF5A	A_24_P31235	0.479	Homo sapiens eukaryotic translation initiation factor 5A (EIF5A), mRNA [NM_001970]
P63279	UBE2I	A_24_P227993	2.258	Homo sapiens cDNA clone IMAGE:5090094, partial cds. [BC064492]
P63313	TMSB10	A_23_P68106	3.002	Homo sapiens thymosin, beta 10 (TMSB10), mRNA [NM_021103]
P68366	TUBA4A	A_23_P154065, A_23_P84448	3.8415	Homo sapiens tubulin, alpha 1 (testis specific) (TUBA1), mRNA [NM_006000],Homo sapiens tubulin, alpha 4 (TUBA4), mRNA [NM_025019]
P78316	NOP14	A_32_P22622	0.372	Homo sapiens chromosome 4 open reading frame 9 (C4orf9), mRNA [NM_003703]
P78324	SIRPA	A_23_P210708	4.866	Homo sapiens protein tyrosine phosphatase, non-receptor type substrate 1 (PTPNS1), mRNA [NM_080792]
P78330	PSPH	A_23_P251984	0.494	Homo sapiens phosphoserine phosphatase (PSPH), mRNA [NM_004577]
P78348	ASIC1	A_23_P204751	0.384	Homo sapiens amiloride-sensitive cation channel 2, neuronal (ACCN2), transcript variant 1, mRNA [NM_020039]
P78411	IRX5	A_23_P9779, A_24_P48057	0.256	Homo sapiens iroquois homeobox protein 5 (IRX5), mRNA [NM_005853]
P78415	IRX3	A_23_P152235	0.176	Homo sapiens iroquois homeobox protein 3 (IRX3), mRNA [NM_024336]
P78527	PRKDC	A_32_P25204	0.318	Homo sapiens protein kinase, DNA-activated, catalytic polypeptide (PRKDC), mRNA [NM_006904]
P78537	BLOC1S1	A_23_P53298	2.086	Homo sapiens biogenesis of lysosome-related organelles complex-1, subunit 1 (BLOC1S1), mRNA [NM_001487]
P78539	SRPX	A_23_P96383	0.119	Homo sapiens sushi-repeat-containing protein, X-linked (SRPX), mRNA [NM_006307]
P78543	BTG2	A_23_P62901	8.297	Homo sapiens BTG family, member 2 (BTG2), mRNA [NM_006763]
P78549	NTHL1	A_23_P88904	0.325	Homo sapiens nth endonuclease III-like 1 (E. coli) (NTHL1), mRNA [NM_002528]
P78552	IL13RA1	A_24_P280113	15.26	Homo sapiens interleukin 13 receptor, alpha 1 (IL13RA1), mRNA [NM_001560]
P80217	IFI35	A_23_P152782	2.482	Homo sapiens interferon-induced protein 35 (IFI35), mRNA [NM_005533]
P82663	MRPS25	A_23_P18135	0.416	Homo sapiens mitochondrial ribosomal protein S25 (MRPS25), nuclear gene encoding mitochondrial protein, mRNA [NM_022497]
P82664	MRPS10	A_24_P283294	0.458	Homo sapiens mitochondrial ribosomal protein S10 (MRPS10), nuclear gene encoding mitochondrial protein, mRNA [NM_018141]
P82970	HMGN5	A_23_P136909, A_32_P444460	0.446	Homo sapiens nucleosomal binding protein 1 (NSBP1), mRNA [NM_030763]
P84101	SERF2	A_24_P313334	2.291	Homo sapiens cDNA FLJ37527 fis, clone BRCAN2011946. [AK094846]
P99999	CYCS	A_24_P573978	0.362	CCHU cytochrome c [validated] - human {Homo sapiens;} , partial (85%) [THC2371907]
Q00534	CDK6	A_23_P168651, A_24_P166663	0.3225	Homo sapiens cyclin-dependent kinase 6 (CDK6), mRNA [NM_001259]
Q00796	SORD	A_23_P77103, A_32_P127153, A_32_P89691	0.232667	Homo sapiens sorbitol dehydrogenase (SORD), mRNA [NM_003104]
Q00839	HNRNPU	A_24_P171110	0.403	Homo sapiens heterogeneous nuclear ribonucleoprotein U (scaffold attachment factor A) (HNRPU), transcript variant 2, mRNA [NM_004501]
Q00987	MDM2	A_23_P139895	0.496	Homo sapiens hypothetical protein MGC5370, mRNA (cDNA clone IMAGE:3049213), partial cds. [BC006795]
Q01201	RELB	A_23_P55706	3.213	Homo sapiens v-rel reticuloendotheliosis viral oncogene homolog B, nuclear factor of kappa light polypeptide gene enhancer in B-cells 3 (avian) (RELB), mRNA [NM_006509]
Q01432	AMPD3	A_23_P116286	2.058	Homo sapiens adenosine monophosphate deaminase (isoform E) (AMPD3), transcript variant 1, mRNA [NM_000480]
Q01469	FABP5	A_24_P7642, A_32_P204676	0.2265	Homo sapiens fatty acid binding protein 5 (psoriasis-associated) (FABP5), mRNA [NM_001444]
Q01650	SLC7A5	A_24_P335620	0.282	Homo sapiens solute carrier family 7 (cationic amino acid transporter, y+ system), member 5 (SLC7A5), mRNA [NM_003486]
Q01804	OTUD4	A_23_P212974	0.484	Homo sapiens HIV-1 induced protein HIN-1 (HSHIN1), transcript variant 1, mRNA [NM_199324]
Q01850	CDR2	A_23_P14957, A_24_P339071	0.4005	Homo sapiens cerebellar degeneration-related protein 2, 62kDa (CDR2), mRNA [NM_001802]
Q02127	DHODH	A_23_P15202	0.369	Homo sapiens dihydroorotate dehydrogenase (DHODH), nuclear gene encoding mitochondrial protein, transcript variant 1, mRNA [NM_001361]
Q02363	ID2	A_23_P143143, A_32_P69368	4.2215	Homo sapiens inhibitor of DNA binding 2, dominant negative helix-loop-helix protein (ID2), mRNA [NM_002166]
Q02790	FKBP4	A_32_P71788	0.165	Homo sapiens FK506 binding protein 4, 59kDa (FKBP4), mRNA [NM_002014]
Q02930	CREB5	A_24_P532232	0.429	Homo sapiens cAMP responsive element binding protein 5 (CREB5), transcript variant 1, mRNA [NM_182898]
Q03169	TNFAIP2	A_23_P421423	5.971	Homo sapiens tumor necrosis factor, alpha-induced protein 2 (TNFAIP2), mRNA [NM_006291]
Q03252	LMNB2	A_23_P56316	0.367	Homo sapiens translocase of inner mitochondrial membrane 13 homolog (yeast) (TIMM13), nuclear gene encoding mitochondrial protein, mRNA [NM_012458]
Q04446	GBE1	A_23_P121082	0.333	Homo sapiens glucan (1,4-alpha-), branching enzyme 1 (glycogen branching enzyme, Andersen disease, glycogen storage disease type IV) (GBE1), mRNA [NM_000158]
Q04726	TLE3	A_23_P342934, A_24_P13682	2.1095	Homo sapiens mRNA for KIAA1547 protein, partial cds. [AB046767],Homo sapiens transducin-like enhancer of split 3 (E(sp1) homolog, Drosophila) (TLE3), mRNA [NM_005078]
Q04837	SSBP1	A_23_P31536	0.458	Homo sapiens single-stranded DNA binding protein 1 (SSBP1), mRNA [NM_003143]
Q04864	REL	A_23_P56938	2.23	Homo sapiens v-rel reticuloendotheliosis viral oncogene homolog (avian) (REL), mRNA [NM_002908]
Q05513	PRKCZ	A_23_P51187	2.068	Homo sapiens protein kinase C, zeta (PRKCZ), mRNA [NM_002744]
Q05516	ZBTB16	A_23_P104804	0.139	Homo sapiens zinc finger and BTB domain containing 16 (ZBTB16), transcript variant 1, mRNA [NM_006006]
Q05923	DUSP2	A_23_P108842, A_24_P37409	0.386	Homo sapiens dual specificity phosphatase 2 (DUSP2), mRNA [NM_004418]
Q06203	PPAT	A_23_P80940, A_24_P123347	0.388	Homo sapiens phosphoribosyl pyrophosphate amidotransferase (PPAT), mRNA [NM_002703]
Q06481	APLP2	A_23_P202939	2.154	Homo sapiens amyloid beta (A4) precursor-like protein 2 (APLP2), mRNA [NM_001642]
Q06787	FMR1	A_24_P40417	2.289	Homo sapiens fragile X mental retardation 1 (FMR1), mRNA [NM_002024]
Q06945	SOX4	A_23_P82169, A_24_P911676	2.8745	Homo sapiens SRY (sex determining region Y)-box 4 (SOX4), mRNA [NM_003107]
Q07021	C1QBP	A_23_P370434	0.45	Homo sapiens complement component 1, q subcomponent binding protein (C1QBP), nuclear gene encoding mitochondrial protein, mRNA [NM_001212]
Q07890	SOS2	A_23_P117546	2.039	Homo sapiens cDNA FLJ26410 fis, clone HRT09622. [AK129920]
Q08257	CRYZ	A_23_P114662	0.409	Homo sapiens crystallin, zeta (quinone reductase) (CRYZ), mRNA [NM_001889]
Q08334	IL10RB	A_24_P322741	2.902	Homo sapiens interleukin 10 receptor, beta (IL10RB), mRNA [NM_000628]
Q08AG7	MZT1	A_32_P9382	0.498	Homo sapiens cDNA: FLJ21869 fis, clone HEP02442. [AK025522]
Q09327	MGAT3	A_24_P245838	0.176	Homo sapiens cDNA FLJ43371 fis, clone NTONG2005969. [AK125361]
Q09666	AHNAK	A_24_P943393	0.0432	Homo sapiens AHNAK nucleoprotein (desmoyokin) (AHNAK), transcript variant 1, mRNA [NM_001620]
Q0D2I5	IFFO1	A_23_P87742	3.313	Homo sapiens HOM-TES-103 tumor antigen-like (HOM-TES-103), transcript variant 3, mRNA [NM_080731]
Q0VD83	APOBR	A_23_P54770	5.851	Homo sapiens apolipoprotein B48 receptor (APOB48R), mRNA [NM_182804]
Q0ZGT2	NEXN	A_24_P409971	0.468	Homo sapiens nexilin (F actin binding protein) (NEXN), mRNA [NM_144573]
Q10588	BST1	A_23_P7325	4.387	Homo sapiens bone marrow stromal cell antigen 1 (BST1), mRNA [NM_004334]
Q11130	FUT7	A_23_P170534	0.16	Homo sapiens fucosyltransferase 7 (alpha (1,3) fucosyltransferase) (FUT7), mRNA [NM_004479]
Q12788	TBL3	A_23_P106720	0.44	Homo sapiens transducin (beta)-like 3 (TBL3), mRNA [NM_006453]
Q12797	ASPH	A_24_P295245	0.473	Homo sapiens aspartate beta-hydroxylase (ASPH), transcript variant 4, mRNA [NM_032467]
Q12802	AKAP13	A_24_P142095	2.22	Homo sapiens A kinase (PRKA) anchor protein 13 (AKAP13), transcript variant 1, mRNA [NM_006738]
Q12809	KCNH2	A_23_P168403	0.0472	Homo sapiens potassium voltage-gated channel, subfamily H (eag-related), member 2 (KCNH2), transcript variant 1, mRNA [NM_000238]
Q12912	LRMP	A_23_P98910	2.253	Homo sapiens lymphoid-restricted membrane protein (LRMP), mRNA [NM_006152]
Q12931	TRAP1	A_23_P3849	0.38	Homo sapiens TNF receptor-associated protein 1 (TRAP1), mRNA [NM_016292]
Q12948	FOXC1	A_23_P390504	23.16	Homo sapiens forkhead box C1 (FOXC1), mRNA [NM_001453]
Q13094	LCP2	A_23_P30547	3.098	Homo sapiens lymphocyte cytosolic protein 2 (SH2 domain containing leukocyte protein of 76kDa) (LCP2), mRNA [NM_005565]
Q13115	DUSP4	A_23_P134935	4.387	Homo sapiens dual specificity phosphatase 4 (DUSP4), transcript variant 1, mRNA [NM_001394]
Q13126	MTAP	A_24_P196519	0.474	Homo sapiens methylthioadenosine phosphorylase (MTAP), mRNA [NM_002451]
Q13133	NR1H3	A_23_P47135	2.445	Homo sapiens nuclear receptor subfamily 1, group H, member 3 (NR1H3), mRNA [NM_005693]
Q13153	PAK1	A_23_P75989	2.577	Homo sapiens p21/Cdc42/Rac1-activated kinase 1 (STE20 homolog, yeast) (PAK1), mRNA [NM_002576]
Q13162	PRDX4	A_23_P114232	0.291	Homo sapiens peroxiredoxin 4 (PRDX4), mRNA [NM_006406]
Q13185	CBX3	A_23_P31315	0.5	Homo sapiens chromobox homolog 3 (HP1 gamma homolog, Drosophila) (CBX3), transcript variant 2, mRNA [NM_016587]
Q13206	DDX10	A_23_P32938	0.453	Homo sapiens DEAD (Asp-Glu-Ala-Asp) box polypeptide 10 (DDX10), mRNA [NM_004398]
Q13239	SLA	A_23_P216340	11.94	Homo sapiens Src-like-adaptor (SLA), mRNA [NM_006748]
Q13322	GRB10	A_24_P235266	0.199	Homo sapiens growth factor receptor-bound protein 10 (GRB10), transcript variant 4, mRNA [NM_001001555]
Q13323	BIK	A_23_P404667	0.124	Homo sapiens BCL2-interacting killer (apoptosis-inducing) (BIK), mRNA [NM_001197]
Q13418	ILK	A_23_P105066, A_24_P406870	2.238	Homo sapiens integrin-linked kinase (ILK), transcript variant 3, mRNA [NM_001014795]
Q13428	TCOF1	A_23_P310317	0.378	Homo sapiens Treacher Collins-Franceschetti syndrome 1 (TCOF1), transcript variant 1, mRNA [NM_001008656]
Q13442	PDAP1	A_23_P123256	0.493	Homo sapiens PDGFA associated protein 1 (PDAP1), mRNA [NM_014891]
Q13444	ADAM15	A_23_P159227	0.394	Homo sapiens a disintegrin and metalloproteinase domain 15 (metargidin) (ADAM15), transcript variant 1, mRNA [NM_207191]
Q13451	FKBP5	A_23_P111206, A_24_P38081	0.32	Homo sapiens FK506 binding protein 5 (FKBP5), mRNA [NM_004117]
Q13459	MYO9B	A_24_P246173	2.302	Homo sapiens myosin IXB (MYO9B), mRNA [NM_004145]
Q13488	TCIRG1	A_23_P75369	2.561	Homo sapiens T-cell, immune regulator 1, ATPase, H+ transporting, lysosomal V0 protein a isoform 3 (TCIRG1), transcript variant 1, mRNA [NM_006019]
Q13489	BIRC3	A_23_P98350	0.261	Homo sapiens baculoviral IAP repeat-containing 3 (BIRC3), transcript variant 1, mRNA [NM_001165]
Q13510	ASAH1	A_23_P216325	4.707	Homo sapiens N-acylsphingosine amidohydrolase (acid ceramidase) 1 (ASAH1), transcript variant 2, mRNA [NM_004315]
Q13541	EIF4EBP1	A_23_P22224	0.452	Homo sapiens eukaryotic translation initiation factor 4E binding protein 1 (EIF4EBP1), mRNA [NM_004095]
Q13542	EIF4EBP2	A_24_P115621	2.22	Homo sapiens mRNA; cDNA DKFZp762K067 (from clone DKFZp762K067). [CR627373]
Q13555	CAMK2G	A_24_P141332	3.465	Homo sapiens calcium/calmodulin-dependent protein kinase (CaM kinase) II gamma (CAMK2G), transcript variant 1, mRNA [NM_172171]
Q13564	NAE1	A_23_P77459	0.427	Homo sapiens amyloid beta precursor protein binding protein 1 (APPBP1), transcript variant 1, mRNA [NM_003905]
Q13568	IRF5	A_23_P500271	2.298	Homo sapiens interferon regulatory factor 5 (IRF5), transcript variant 1, mRNA [NM_002200]
Q13572	ITPK1	A_23_P37399	2.456	Homo sapiens inositol 1,3,4-triphosphate 5/6 kinase (ITPK1), mRNA [NM_014216]
Q13610	PWP1	A_23_P395524	0.42	Homo sapiens PWP1 homolog (S. cerevisiae) (PWP1), mRNA [NM_007062]
Q13636	RAB31	A_23_P141688, A_24_P236799	15.315	Homo sapiens RAB31, member RAS oncogene family (RAB31), mRNA [NM_006868]
Q13651	IL10RA	A_24_P107303	2.261	Homo sapiens interleukin 10 receptor, alpha (IL10RA), mRNA [NM_001558]
Q13748	TUBA3C, TUBA3D	A_23_P128598	2.351	Homo sapiens tubulin, alpha 2 (TUBA2), transcript variant 2, mRNA [NM_079836]
Q13761	RUNX3	A_23_P51231	3.027	Homo sapiens runt-related transcription factor 3 (RUNX3), mRNA [NM_004350]
Q13794	PMAIP1	A_23_P207999	3.412	Homo sapiens phorbol-12-myristate-13-acetate-induced protein 1 (PMAIP1), mRNA [NM_021127]
Q13868	EXOSC2	A_23_P216396	0.447	Homo sapiens exosome component 2 (EXOSC2), mRNA [NM_014285]
Q13889	GTF2H3	A_23_P386420	0.374	Homo sapiens general transcription factor IIH, polypeptide 3, 34kDa (GTF2H3), mRNA [NM_001516]
Q13950	RUNX2	A_32_P161762	2.628	Homo sapiens runt-related transcription factor 2 (RUNX2), transcript variant 3, mRNA [NM_004348]
Q14005	IL16	A_23_P61057	2.338	Homo sapiens interleukin 16 (lymphocyte chemoattractant factor) (IL16), transcript variant 1, mRNA [NM_004513]
Q14019	COTL1	A_23_P3866, A_24_P416131	2.0505	Homo sapiens coactosin-like 1 (Dictyostelium) (COTL1), mRNA [NM_021149]
Q14050	COL9A3	A_23_P40108	10.09	Homo sapiens collagen, type IX, alpha 3 (COL9A3), mRNA [NM_001853]
Q14088	RAB33A	A_23_P147025	2.496	Homo sapiens RAB33A, member RAS oncogene family (RAB33A), mRNA [NM_004794]
Q14114	LRP8	A_23_P200222, A_23_P34325	0.2935	Homo sapiens low density lipoprotein receptor-related protein 8, apolipoprotein e receptor (LRP8), transcript variant 2, mRNA [NM_033300]
Q14116	IL18	A_23_P104798	3.611	Homo sapiens interleukin 18 (interferon-gamma-inducing factor) (IL18), mRNA [NM_001562]
Q14137	BOP1	A_23_P43800	0.284	Homo sapiens block of proliferation 1 (BOP1), mRNA [NM_015201]
Q14146	URB2	A_23_P74914	0.361	Homo sapiens KIAA0133 (KIAA0133), mRNA [NM_014777]
Q14188	TFDP2	A_23_P166964	0.195	Homo sapiens transcription factor Dp-2 (E2F dimerization partner 2) (TFDP2), mRNA [NM_006286]
Q14244	MAP7	A_24_P98021	0.0983	Homo sapiens microtubule-associated protein 7 (MAP7), mRNA [NM_003980]
Q14246	ADGRE1	A_23_P27556	3.943	Homo sapiens egf-like module containing, mucin-like, hormone receptor-like 1 (EMR1), mRNA [NM_001974]
Q14249	ENDOG	A_23_P83266	0.444	Homo sapiens endonuclease G (ENDOG), nuclear gene encoding mitochondrial protein, mRNA [NM_004435]
Q14289	PTK2B	A_23_P168836	2.209	Homo sapiens PTK2B protein tyrosine kinase 2 beta (PTK2B), transcript variant 1, mRNA [NM_173174]
Q14469	HES1	A_23_P17998	0.196	Homo sapiens hairy and enhancer of split 1, (Drosophila) (HES1), mRNA [NM_005524]
Q14526	HIC1	A_23_P129856	8.904	Q9V9M3 (Q9V9M3) CG16937-PA, partial (6%) [THC2375716]
Q14527	HLTF	A_24_P248251	0.482	Homo sapiens SWI/SNF related, matrix associated, actin dependent regulator of chromatin, subfamily a, member 3 (SMARCA3), transcript variant 2, mRNA [NM_139048]
Q14571	ITPR2	A_23_P203933	5.38	Homo sapiens inositol 1,4,5-triphosphate receptor, type 2 (ITPR2), mRNA [NM_002223]
Q14642	INPP5A	A_24_P26897	0.28	Homo sapiens inositol polyphosphate-5-phosphatase, 40kDa (INPP5A), mRNA [NM_005539]
Q14656	TMEM187	A_23_P85180	2.118	Homo sapiens chromosome X open reading frame 12 (CXorf12), mRNA [NM_003492]
Q14684	RRP1B	A_23_P256297, A_24_P944040	0.397	Homo sapiens KIAA0179 (KIAA0179), mRNA [NM_015056]
Q14690	PDCD11	A_23_P161257	0.342	Q5W093 (Q5W093) OTTHUMP00000059187 (Programmed cell death 11), complete [THC2306200]
Q14699	RFTN1	A_23_P315571	0.147	Homo sapiens raft-linking protein (RAFTLIN), mRNA [NM_015150]
Q14722	KCNAB1	A_32_P124773	0.36	Voltage-gated potassium channel subunit beta-1
Q14764	MVP	A_23_P88819	4.908	Homo sapiens major vault protein (MVP), transcript variant 1, mRNA [NM_017458]
Q14774	HLX	A_23_P126266	5.572	Homo sapiens H2.0-like homeo box 1 (Drosophila) (HLX1), mRNA [NM_021958]
Q14938	NFIX	A_24_P858698	0.472	Homo sapiens nuclear factor I/X (CCAAT-binding transcription factor) (NFIX), mRNA [NM_002501]
Q14978	NOLC1	A_23_P202143, A_23_P314151	0.3355	Homo sapiens nucleolar and coiled-body phosphoprotein 1 (NOLC1), mRNA [NM_004741],Homo sapiens nucleolar and coiled-body phosphoprotein 1, mRNA (cDNA clone MGC:5049 IMAGE:2900024), complete cds. [BC006769]
Q15006	EMC2	A_23_P60002	0.487	Homo sapiens KIAA0103 (KIAA0103), mRNA [NM_014673]
Q15043	SLC39A14	A_23_P59950	0.213	Homo sapiens solute carrier family 39 (zinc transporter), member 14 (SLC39A14), mRNA [NM_015359]
Q15049	MLC1	A_23_P211680	0.237	Homo sapiens megalencephalic leukoencephalopathy with subcortical cysts 1 (MLC1), transcript variant 1, mRNA [NM_015166]
Q15050	RRS1	A_23_P146187	0.439	Homo sapiens RRS1 ribosome biogenesis regulator homolog (S. cerevisiae) (RRS1), mRNA [NM_015169]
Q15054	POLD3	A_24_P75056	0.412	Homo sapiens polymerase (DNA-directed), delta 3, accessory subunit (POLD3), mRNA [NM_006591]
Q15061	WDR43	A_23_P344853	0.402	Homo sapiens KIAA0007 mRNA, partial cds. [D26488]
Q15077	P2RY6	A_23_P64611	0.417	Homo sapiens pyrimidinergic receptor P2Y, G-protein coupled, 6 (P2RY6), transcript variant 2, mRNA [NM_176798]
Q15109	AGER	A_23_P93360	2.063	Homo sapiens advanced glycosylation end product-specific receptor (AGER), transcript variant 1, mRNA [NM_001136]
Q15118	PDK1	A_24_P37441	0.31	Homo sapiens pyruvate dehydrogenase kinase, isoenzyme 1 (PDK1), nuclear gene encoding mitochondrial protein, mRNA [NM_002610]
Q15208	STK38	A_24_P63727	2.231	Homo sapiens serine/threonine kinase 38 (STK38), mRNA [NM_007271]
Q15390	MTFR1	A_24_P346587	0.44	Homo sapiens chondrocyte protein with a poly-proline region (CHPPR), mRNA [NM_014637]
Q15397	PUM3	A_23_P20683	0.351	Homo sapiens KIAA0020 (KIAA0020), mRNA [NM_014878]
Q15438	CYTH1	A_23_P83781	4.183	Homo sapiens pleckstrin homology, Sec7 and coiled-coil domains 1(cytohesin 1) (PSCD1), transcript variant 1, mRNA [NM_004762]
Q15506	SPA17	A_23_P104876	0.434	Homo sapiens sperm autoantigenic protein 17 (SPA17), mRNA [NM_017425]
Q15542	TAF5	A_23_P52311	0.406	Homo sapiens TAF5 RNA polymerase II, TATA box binding protein (TBP)-associated factor, 100kDa (TAF5), mRNA [NM_006951]
Q15652	JMJD1C	A_23_P427217	2.114	Homo sapiens jumonji domain containing 1C (JMJD1C), mRNA [NM_004241]
Q15654	TRIP6	A_23_P252125, A_24_P4054	0.399	Homo sapiens thyroid hormone receptor interactor 6 (TRIP6), mRNA [NM_003302],TRI6_HUMAN (Q15654) Thyroid receptor interacting protein 6 (TRIP6) (OPA-interacting protein 1) (Zyxin related protein 1) (ZRP-1), complete [THC2243803]
Q15722	LTB4R	A_23_P151791	2.361	Homo sapiens leukotriene B4 receptor (LTB4R), mRNA [NM_181657]
Q15751	HERC1	A_23_P257503	2.731	Homo sapiens hect (homologous to the E6-AP (UBE3A) carboxyl terminus) domain and RCC1 (CHC1)-like domain (RLD) 1 (HERC1), mRNA [NM_003922]
Q15911	ZFHX3	A_23_P118266	3.805	Homo sapiens AT-binding transcription factor 1 (ATBF1), mRNA [NM_006885]
Q15942	ZYX	A_23_P254888	2.286	Homo sapiens zyxin (ZYX), transcript variant 1, mRNA [NM_003461]
Q16222	UAP1	A_23_P160460	0.344	Homo sapiens UDP-N-acteylglucosamine pyrophosphorylase 1 (UAP1), mRNA [NM_003115]
Q16512	PKN1	A_23_P67271	2.599	Homo sapiens protein kinase N1 (PKN1), transcript variant 2, mRNA [NM_002741]
Q16533	SNAPC1	A_23_P37244	0.418	Homo sapiens small nuclear RNA activating complex, polypeptide 1, 43kDa (SNAPC1), mRNA [NM_003082]
Q16548	BCL2A1	A_23_P152002	24.56	Homo sapiens BCL2-related protein A1 (BCL2A1), mRNA [NM_004049]
Q16555	DPYSL2	A_23_P350824, A_24_P38347	3.26	Homo sapiens dihydropyrimidinase-like 2 (DPYSL2), mRNA [NM_001386]
Q16558	KCNMB1	A_23_P19142	2.628	Homo sapiens potassium large conductance calcium-activated channel, subfamily M, beta member 1 (KCNMB1), mRNA [NM_004137]
Q16584	MAP3K11	A_23_P98275	3.028	Homo sapiens mitogen-activated protein kinase kinase kinase 11 (MAP3K11), mRNA [NM_002419]
Q16589	CCNG2	A_23_P110122	6.09	Homo sapiens cyclin G2 (CCNG2), mRNA [NM_004354]
Q16617	NKG7	A_23_P119042	4.51	Homo sapiens natural killer cell group 7 sequence (NKG7), mRNA [NM_005601]
Q16621	NFE2	A_23_P13753	0.154	Homo sapiens nuclear factor (erythroid-derived 2), 45kDa (NFE2), mRNA [NM_006163]
Q16666	IFI16	A_23_P217866	3.11	Homo sapiens cDNA FLJ37649 fis, clone BRHIP2000534, moderately similar to GAMMA-INTERFERON-INDUCIBLE PROTEIN IFI-16. [AK094968]
Q16778	HIST2H2BE	A_24_P156911	2.231	Homo sapiens histone 2, H2be (HIST2H2BE), mRNA [NM_003528]
Q16798	ME3	A_23_P116614	0.268	Homo sapiens malic enzyme 3, NADP(+)-dependent, mitochondrial (ME3), nuclear gene encoding mitochondrial protein, transcript variant 2, mRNA [NM_001014811]
Q16822	PCK2	A_23_P128817, A_23_P140207	0.3845	Homo sapiens phosphoenolpyruvate carboxykinase 2 (mitochondrial) (PCK2), nuclear gene encoding mitochondrial protein, transcript variant 1, mRNA [NM_004563]
Q16828	DUSP6	A_23_P139704	5.64	Homo sapiens dual specificity phosphatase 6 (DUSP6), transcript variant 1, mRNA [NM_001946]
Q17RN3	FAM98C	A_23_P369983	2.681	Homo sapiens hypothetical protein LOC147965 (LOC147965), mRNA [NM_174905]
Q1EHB4	SLC5A12	A_23_P323943	0.126	Homo sapiens solute carrier family 5 (sodium/glucose cotransporter), member 12 (SLC5A12), mRNA [NM_178498]
Q1MSJ5	CSPP1	A_23_P169558, A_23_P71537	0.363	Homo sapiens centrosome spindle pole associated protein (CSPP), mRNA [NM_024790]
Q2KHR3	QSER1	A_23_P203283	0.462	Homo sapiens cDNA FLJ43914 fis, clone TESTI4011161. [AK125902]
Q2M238		A_23_P3552	0.472	Homo sapiens RRN3 RNA polymerase I transcription factor homolog (yeast), mRNA (cDNA clone IMAGE:3678732), partial cds. [BC009198]
Q2M3R5	SLC35G1	A_32_P101264	0.492	Solute carrier family 35 member G1
Q2NKX9	C2orf68	A_32_P179005	2.073	UPF0561 protein C2orf68
Q2NL82	TSR1	A_23_P107087	0.292	Homo sapiens hypothetical protein FLJ10534 (FLJ10534), mRNA [NM_018128]
Q330K2	NDUFAF6	A_23_P330486	0.428	Homo sapiens chromosome 8 open reading frame 38 (C8orf38), mRNA [NM_152416]
Q3B726	TWISTNB	A_23_P386561	0.435	Homo sapiens TWIST neighbor (TWISTNB), mRNA [NM_001002926]
Q3B820	FAM161A	A_32_P82189	0.354	Homo sapiens cDNA FLJ13305 fis, clone OVARC1001399. [AK023367]
Q3KP66	C1orf106	A_23_P1043	0.474	Homo sapiens chromosome 1 open reading frame 106 (C1orf106), mRNA [NM_018265]
Q3SX64	ODF3L2	A_23_P316850	2.104	Homo sapiens chromosome 19 open reading frame 19 (C19orf19), mRNA [NM_182577]
Q4G0N4	NADK2	A_23_P337168	0.357	Homo sapiens hypothetical protein FLJ30596 (FLJ30596), mRNA [NM_153013]
Q4G0N7	FAM229B	A_24_P756657	0.426	Homo sapiens mRNA; cDNA DKFZp586F0922 (from clone DKFZp586F0922). [AL049461]
Q502X0	MORN2	A_32_P69465	0.427	Homo sapiens protein containing single MORN motif in testis (MOPT), mRNA [NM_194270]
Q53EP0	FNDC3B	A_24_P223124	2.056	Homo sapiens fibronectin type III domain containing 3B (FNDC3B), mRNA [NM_022763]
Q53ET0	CRTC2	A_23_P12173	2.041	Homo sapiens transducer of regulated cAMP response element-binding protein (CREB) 2 (TORC2), mRNA [NM_181715]
Q53GL0	PLEKHO1	A_23_P35114	5.156	Homo sapiens CK2 interacting protein 1; HQ0024c protein (CKIP-1), mRNA [NM_016274]
Q53H96	PYCRL	A_23_P383278, A_24_P4212	0.3265	Homo sapiens pyrroline-5-carboxylate reductase-like (PYCRL), mRNA [NM_023078]
Q53RT3	ASPRV1	A_23_P417383	2.233	Homo sapiens hypothetical protein FLJ25084 (FLJ25084), mRNA [NM_152792]
Q53S33	BOLA3	A_24_P77364	0.445	Homo sapiens bolA-like 3 (E. coli) (BOLA3), mRNA [NM_212552]
Q53S58	TMEM177	A_23_P5339	0.372	Homo sapiens hypothetical protein MGC10993 (MGC10993), mRNA [NM_030577]
Q53T94	TAF1B	A_23_P165891	0.488	Homo sapiens TATA box binding protein (TBP)-associated factor, RNA polymerase I, B, 63kDa (TAF1B), mRNA [NM_005680]
Q53TN4	CYBRD1	A_23_P209564	3.873	Homo sapiens cytochrome b reductase 1 (CYBRD1), mRNA [NM_024843]
Q562E7	WDR81	A_23_P354208	2.16	Homo sapiens hypothetical protein FLJ33817 (FLJ33817), mRNA [NM_152348]
Q58EX2	SDK2	A_32_P194312	0.406	Homo sapiens sidekick homolog 2 (chicken), mRNA (cDNA clone IMAGE:6172764), partial cds. [BC066363]
Q58EX7	PLEKHG4	A_23_P345460	0.418	Homo sapiens pleckstrin homology domain containing, family G (with RhoGef domain) member 4 (PLEKHG4), mRNA [NM_015432]
Q5H9K5	ZMAT1	A_23_P125748	2.185	Homo sapiens zinc finger, matrin type 1 (ZMAT1), transcript variant 3, mRNA [NM_032441]
Q5H9S7	DCAF17	A_23_P5481	0.44	Homo sapiens hypothetical protein FLJ13096 (FLJ13096), mRNA [NM_025000]
Q5HYK9	ZNF667	A_23_P101623	0.338	Homo sapiens zinc finger protein 667 (ZNF667), mRNA [NM_022103]
Q5JSL3	DOCK11	A_23_P148584	2.089	Homo sapiens dedicator of cytokinesis 11 (DOCK11), mRNA [NM_144658]
Q5JSP0	FGD3	A_24_P153840	5.237	Homo sapiens FYVE, RhoGEF and PH domain containing 3 (FGD3), mRNA [NM_033086]
Q5JTC6	AMER1	A_23_P308150	0.349	Homo sapiens hypothetical protein FLJ39827 (FLJ39827), mRNA [NM_152424]
Q5JU69	TOR2A	A_23_P60534	2.501	Homo sapiens torsin family 2, member A (TOR2A), mRNA [NM_130459]
Q5K4L6	SLC27A3	A_24_P179816	4.669	Homo sapiens solute carrier family 27 (fatty acid transporter), member 3 (SLC27A3), mRNA [NM_024330]
Q5M775	SPECC1	A_23_P38567	5.489	Homo sapiens spectrin domain with coiled-coils 1 (SPECC1), mRNA [NM_152904]
Q5PSV4	BRMS1L	A_23_P205419	0.474	Homo sapiens breast cancer metastasis-suppressor 1-like (BRMS1L), mRNA [NM_032352]
Q5R3I4	TTC38	A_23_P254193	2.294	Homo sapiens hypothetical protein FLJ20699 (FLJ20699), mRNA [NM_017931]
Q5SY16	NOL9	A_23_P126727	0.432	Homo sapiens hypothetical protein FLJ23323 (FLJ23323), mRNA [NM_024654]
Q5T013	HYI	A_23_P200976	2.254	Homo sapiens hydroxypyruvate isomerase homolog (E. coli) (HYI), mRNA [NM_031207]
Q5T1R4	HIVEP3	A_32_P59302	14.48	Homo sapiens cDNA clone IMAGE:6254031. [BC080552]
Q5T2D2	TREML2	A_23_P7932	0.236	Homo sapiens triggering receptor expressed on myeloid cells-like 2 (TREML2), mRNA [NM_024807]
Q5T3I0		A_23_P97265	0.353	Homo sapiens G patch domain containing 4 (GPATC4), transcript variant 3, mRNA [NM_017725]
Q5T4T1	TMEM170B	A_32_P178966	2.919	Transmembrane protein 170B
Q5T5X7	BEND3	A_23_P359854	0.423	Homo sapiens mRNA for KIAA1553 protein, partial cds. [AB046773]
Q5T953	IER5L	A_24_P383450	5.952	Homo sapiens immediate early response 5-like (IER5L), mRNA [NM_203434]
Q5T9A4	ATAD3B	A_23_P74688	0.335	Homo sapiens ATPase family, AAA domain containing 3B (ATAD3B), mRNA [NM_031921]
Q5T9C2	FAM102A	A_23_P112531	2.188	Homo sapiens chromosome 9 open reading frame 132 (C9orf132), mRNA [NM_203305]
Q5TCX8	RP5-862P8.2	A_24_P130952, A_24_P130959	0.099	Homo sapiens mixed lineage kinase 4 (KIAA1804), mRNA [NM_032435]
Q5TCZ1	SH3PXD2A	A_23_P35456	2.323	Homo sapiens SH3 multiple domains 1 (SH3MD1), mRNA [NM_014631]
Q5TDH0	DDI2	A_23_P395534	0.372	Homo sapiens regulatory solute carrier protein, family 1, member 1 (RSC1A1), mRNA [NM_006511]
Q5TEJ8	THEMIS2	A_24_P85775	7.705	Homo sapiens chromosome 1 open reading frame 38 (C1orf38), mRNA [NM_004848]
Q5TF58	IFFO2	A_23_P418031	0.307	Homo sapiens mRNA for FLJ00074 protein, partial cds. [AK024480]
Q5U5X0	LYRM7	A_32_P18159	0.443	Homo sapiens hypothetical protein LOC90624 (LOC90624), mRNA [NM_181705]
Q5UIP0	RIF1	A_23_P382302, A_23_P5611, A_23_P5616, A_24_P34476	0.42525	Homo sapiens RAP1 interacting factor homolog (yeast) (RIF1), mRNA [NM_018151]
Q5VUD6	FAM69B	A_23_P431305	0.419	Homo sapiens hypothetical protein MGC20262 (MGC20262), mRNA [NM_152421]
Q5VWC8	HACD4	A_32_P101313	4.202	Homo sapiens similar to RIKEN 4933428I03 (LOC401494), mRNA [NM_001010915]
Q5VWP2	FAM46C	A_23_P137751	0.0881	Homo sapiens family with sequence similarity 46, member C (FAM46C), mRNA [NM_017709]
Q5VYK3	KIAA0368	A_23_P146431	0.496	Homo sapiens KIAA0368, mRNA (cDNA clone MGC:32012 IMAGE:4335177), complete cds. [BC021127]
Q5VYS8	ZCCHC6	A_23_P123727	2.033	Homo sapiens zinc finger, CCHC domain containing 6 (ZCCHC6), mRNA [NM_024617]
Q5VYY1	ANKRD22	A_23_P161428	18.95	Homo sapiens ankyrin repeat domain 22 (ANKRD22), mRNA [NM_144590]
Q5XUX1	FBXW9	A_23_P16214	0.464	Homo sapiens F-box and WD-40 domain protein 9 (FBXW9), mRNA [NM_032301]
Q658P3	STEAP3	A_23_P90601	0.472	Homo sapiens STEAP family member 3 (STEAP3), transcript variant 1, mRNA [NM_182915]
Q659C4	LARP1B	A_23_P7253, A_23_P7353	0.33	Homo sapiens La ribonucleoprotein domain family, member 2 (LARP2), transcript variant 1, mRNA [NM_018078],Homo sapiens La ribonucleoprotein domain family, member 2 (LARP2), transcript variant 2, mRNA [NM_178043]
Q66LE6	PPP2R2D	A_24_P940218	0.485	Homo sapiens mRNA for KIAA1541 protein, partial cds. [AB040974]
Q68CZ1	RPGRIP1L	A_23_P388489, A_32_P123966	0.3905	Homo sapiens KIAA1005 protein (KIAA1005), mRNA [NM_015272]
Q68DN6		A_32_P108544	4.623	Homo sapiens Ran binding protein 2-like 2 (RANBP2L2), mRNA [NM_001024457]
Q68DQ2	CRYBG3	A_23_P303810	2.348	Homo sapiens cDNA FLJ25703 fis, clone TST04744. [AK098569]
Q68EN5	KIAA0895L	A_24_P331655	2.467	Homo sapiens hypothetical protein LOC283849 (LOC283849), mRNA [NM_178516]
Q6FI13	HIST2H2AA3, HIST2H2AA4	A_23_P103981	3.895	Homo sapiens histone 2, H2aa (HIST2H2AA), mRNA [NM_003516]
Q6GTX8	LAIR1	A_23_P209135, A_24_P262688	2.9895	Homo sapiens leukocyte-associated Ig-like receptor 1 (LAIR1), transcript variant b, mRNA [NM_021706],Homo sapiens leukocyte-associated Ig-like receptor 1 (LAIR1), transcript variant c, mRNA [NM_021708]
Q6IA17	SIGIRR	A_23_P84344	2.942	Homo sapiens single Ig IL-1R-related molecule (SIGIRR), mRNA [NM_021805]
Q6ICB0	DESI1	A_23_P356330	0.394	Homo sapiens DNA segment, Chr 15, Wayne State University 75, expressed (D15Wsu75e), mRNA [NM_015704]
Q6IQ19	CCSAP	A_32_P83776	0.488	Homo sapiens chromosome 1 open reading frame 96 (C1orf96), mRNA [NM_145257]
Q6IS14	EIF5AL1	A_24_P31235	0.479	Homo sapiens eukaryotic translation initiation factor 5A (EIF5A), mRNA [NM_001970]
Q6IWH7	ANO7	A_23_P335495	0.0958	Homo sapiens transmembrane protein 16G, mRNA (cDNA clone IMAGE:5224810), partial cds. [BC028162]
Q6J4K2	SLC8B1	A_23_P328600	2.058	Homo sapiens solute carrier family 24 (sodium/potassium/calcium exchanger), member 6 (SLC24A6), mRNA [NM_024959]
Q6JBY9	RCSD1	A_23_P23279	9.484	Homo sapiens RCSD domain containing 1 (RCSD1), mRNA [NM_052862]
Q6N043	ZNF280D	A_23_P14708	2.018	Homo sapiens suppressor of hairy wing homolog 4 (Drosophila) (SUHW4), transcript variant 1, mRNA [NM_017661]
Q6NS38	ALKBH2	A_24_P628384	0.481	Homo sapiens similar to hypothetical protein 9530023G02 (MGC90512), mRNA [NM_001001655]
Q6NTF9	RHBDD2	A_23_P8561	4.24	Homo sapiens rhomboid, veinlet-like 7 (Drosophila) (RHBDL7), mRNA [NM_020684]
Q6NUJ5	PWWP2B	A_23_P374389	0.431	Homo sapiens PWWP domain containing 2 (PWWP2), mRNA [NM_138499]
Q6NYC8	PPP1R18	A_23_P331479	3.764	Homo sapiens KIAA1949, mRNA (cDNA clone MGC:71094 IMAGE:5575643), complete cds. [BC066644]
Q6P179	ERAP2	A_23_P30243	2.001	Homo sapiens leukocyte-derived arginine aminopeptidase (LRAP), mRNA [NM_022350]
Q6P1J6	PLB1	A_23_P56356	4.1	Homo sapiens phospholipase B1, mRNA (cDNA clone MGC:35447 IMAGE:5191712), complete cds. [BC042674]
Q6P1Q9	METTL2B	A_23_P59836	0.444	Homo sapiens methyltransferase like 2 (METTL2), mRNA [NM_018396]
Q6P3X3	TTC27	A_23_P131227	0.402	Homo sapiens hypothetical protein FLJ20272 (FLJ20272), mRNA [NM_017735]
Q6P589	TNFAIP8L2	A_23_P46356	4.004	Homo sapiens tumor necrosis factor, alpha-induced protein 8-like 2 (TNFAIP8L2), mRNA [NM_024575]
Q6P6B7	ANKRD16	A_23_P150069	0.382	Homo sapiens ankyrin repeat domain 16 (ANKRD16), transcript variant 4, mRNA [NM_001009943]
Q6P9F7	LRRC8B	A_24_P345131	0.425	Human mRNA for KIAA0231 gene, partial cds. [D86984]
Q6P9G4	TMEM154	A_23_P361584	5.716	Homo sapiens hypothetical protein FLJ32028 (FLJ32028), mRNA [NM_152680]
Q6P9H5	GIMAP6	A_23_P145631	2.797	Homo sapiens GTPase, IMAP family member 6 (GIMAP6), transcript variant 1, mRNA [NM_024711]
Q6PCB6	ABHD17C	A_32_P39093	0.174	Homo sapiens hypothetical protein from EUROIMAGE 588495, mRNA (cDNA clone IMAGE:30346383), partial cds. [BC059401]
Q6PCB8	EMB	A_24_P684186, A_32_P206541	0.477	Homo sapiens cDNA FLJ46881 fis, clone UTERU3015647, moderately similar to Embigin precursor. [AK128714],Human S6 H-8 mRNA expressed in chromosome 6-suppressed melanoma cells. [U52054]
Q6PI26	SHQ1	A_23_P113441	0.482	Homo sapiens SHQ1 homolog (S. cerevisiae) (SHQ1), mRNA [NM_018130]
Q6PI48	DARS2	A_23_P148984	0.456	Homo sapiens aspartyl-tRNA synthetase 2 (mitochondrial) (DARS2), mRNA [NM_018122]
Q6PJ21	SPSB3	A_23_P3496	2.026	Homo sapiens SPRY domain-containing SOCS box protein SSB-3 (SSB3), mRNA [NM_080861]
Q6PKG0	LARP1	A_24_P7211	0.361	Homo sapiens La ribonucleoprotein domain family, member 1 (LARP1), mRNA [NM_033551]
Q6RW13	AGTRAP	A_23_P158596	2.124	Homo sapiens angiotensin II receptor-associated protein (AGTRAP), mRNA [NM_020350]
Q6UB35	MTHFD1L	A_32_P135243	0.488	Homo sapiens methylenetetrahydrofolate dehydrogenase (NADP+ dependent) 1-like (MTHFD1L), mRNA [NM_015440]
Q6UB99	ANKRD11	A_24_P324405	0.493	Homo sapiens ankyrin repeat domain 11 (ANKRD11), mRNA [NM_013275]
Q6UWL2	SUSD1	A_23_P216610	2.487	Homo sapiens sushi domain containing 1 (SUSD1), mRNA [NM_022486]
Q6UWV2	MPZL3	A_24_P270033	3.528	Homo sapiens cDNA FLJ38080 fis, clone CTONG2016185. [AK095399]
Q6UWY2	PRSS57	A_23_P251805	0.301	Homo sapiens protease, serine-like 1 (PRSSL1), mRNA [NM_214710]
Q6UX40	TMEM107	A_24_P284353	2.081	Homo sapiens hypothetical protein MGC10744 (MGC10744), transcript variant 1, mRNA [NM_032354]
Q6UX65	DRAM2	A_23_P74550, A_24_P268160	2.533	Homo sapiens hypothetical protein MGC54289 (MGC54289), mRNA [NM_178454]
Q6UXV4	APOOL	A_23_P136986	0.45	Homo sapiens chromosome X open reading frame 33 (CXorf33), mRNA [NM_198450]
Q6X4W1	NSMF	A_23_P32064	0.489	Homo sapiens nasal embryonic LHRH factor (NELF), mRNA [NM_015537]
Q6Y1H2	HACD2	A_23_P155197	0.388	Homo sapiens protein tyrosine phosphatase-like (proline instead of catalytic arginine), member b (PTPLB), mRNA [NM_198402]
Q6YBV0	SLC36A4	A_23_P345093, A_23_P86838	0.4205	Homo sapiens solute carrier family 36 (proton/amino acid symporter), member 4 (SLC36A4), mRNA [NM_152313]
Q6ZMD2	SPNS3	A_23_P100963	0.284	Homo sapiens hypothetical protein MGC29671 (MGC29671), mRNA [NM_182538]
Q6ZMS7	ZNF783	A_23_P254442	2.048	Homo sapiens hypothetical protein LOC155060 (LOC155060), mRNA [NM_001004302]
Q6ZN54	DEF8	A_24_P49411	3.833	Homo sapiens hypothetical protein FLJ20186 (FLJ20186), transcript variant 1, mRNA [NM_207514]
Q6ZNC4	ZNF704	A_24_P505790	0.206	Homo sapiens cDNA FLJ16218 fis, clone CTONG3001501, highly similar to Mus musculus glucocorticoid-induced gene 1 mRNA. [AK131274]
Q6ZNJ1	NBEAL2	A_23_P409168	2.088	Homo sapiens mRNA for FLJ00341 protein. [AK131104]
Q6ZS17	FAM65A	A_32_P230868	2.054	Homo sapiens family with sequence similarity 65, member A (FAM65A), mRNA [NM_024519]
Q6ZUS5	CCDC121	A_23_P5742	3.696	Homo sapiens hypothetical protein FLJ13646 (FLJ13646), mRNA [NM_024584]
Q6ZWK4	C1orf186	A_23_P95640	0.027	Homo sapiens hypothetical gene supported by AK122631; BC071785 (LOC440712), mRNA [NM_001007544]
Q6ZYL4	GTF2H5	A_24_P196117	0.489	Homo sapiens general transcription factor IIH, polypeptide 5 (GTF2H5), mRNA [NM_207118]
Q70EL1	USP54	A_23_P355536	0.451	Homo sapiens cDNA FLJ45280 fis, clone BRHIP3001360. [AK127213]
Q76FK4	NOL8	A_24_P58453	0.446	Homo sapiens nucleolar protein 8 (NOL8), mRNA [NM_017948]
Q76N32	CEP68	A_23_P210323	0.463	Homo sapiens mRNA for KIAA0582 protein, partial cds. [AB011154]
Q7L0Q8	RHOU	A_24_P62530	2.747	Homo sapiens ras homolog gene family, member U (RHOU), mRNA [NM_021205]
Q7L266	ASRGL1	A_23_P379864	4.187	Homo sapiens asparaginase like 1, mRNA (cDNA clone IMAGE:3952485), complete cds. [BC006267]
Q7L3V2	C22orf29	A_23_P399726	0.389	Homo sapiens hypothetical protein FLJ21125 (FLJ21125), mRNA [NM_024627]
Q7L590	MCM10	A_23_P161474, A_24_P412088	0.439	Homo sapiens MCM10 minichromosome maintenance deficient 10 (S. cerevisiae) (MCM10), transcript variant 1, mRNA [NM_182751]
Q7L8W6	DPH6	A_24_P56557	0.463	Homo sapiens similar to RIKEN cDNA 5730421E18 gene (MGC14798), mRNA [NM_080650]
Q7L945	ZNF627	A_23_P135730	2.195	Homo sapiens zinc finger protein 627 (ZNF627), mRNA [NM_145295]
Q7LFL8	CXXC5	A_23_P399001	0.261	Homo sapiens CXXC finger 5 (CXXC5), mRNA [NM_016463]
Q7RTX9	SLC16A14	A_23_P131394, A_24_P342829	0.178	Homo sapiens solute carrier family 16 (monocarboxylic acid transporters), member 14 (SLC16A14), mRNA [NM_152527]
Q7RTY1	SLC16A9	A_23_P115726	2.111	Homo sapiens solute carrier family 16 (monocarboxylic acid transporters), member 9 (SLC16A9), mRNA [NM_194298]
Q7Z3C6	ATG9A	A_23_P165450	3.531	Homo sapiens APG9 autophagy 9-like 1 (S. cerevisiae) (APG9L1), mRNA [NM_024085]
Q7Z3S7	CACNA2D4	A_23_P353014	5.961	Homo sapiens calcium channel, voltage-dependent, alpha 2/delta subunit 4 (CACNA2D4), transcript variant 1, mRNA [NM_172364]
Q7Z403	TMC6	A_23_P101013	2.959	Homo sapiens epidermodysplasia verruciformis 1 (EVER1), mRNA [NM_007267]
Q7Z4S6	KIF21A	A_24_P366315	0.372	Homo sapiens kinesin family member 21A (KIF21A), mRNA [NM_017641]
Q7Z5H3	ARHGAP22	A_23_P75310	2.016	Homo sapiens Rho GTPase activating protein 22 (ARHGAP22), mRNA [NM_021226]
Q7Z5R6	APBB1IP	A_23_P401700	3.025	Homo sapiens amyloid beta (A4) precursor protein-binding, family B, member 1 interacting protein (APBB1IP), mRNA [NM_019043]
Q7Z6J0	SH3RF1	A_24_P100551	4.899	Homo sapiens SH3 multiple domains 2 (SH3MD2), mRNA [NM_020870]
Q7Z6M1	RABEPK	A_24_P386323	0.442	Homo sapiens Rab9 effector protein with kelch motifs (RABEPK), mRNA [NM_005833]
Q7Z713	ANKRD37	A_24_P237586	0.437	Homo sapiens ankyrin repeat domain 37 (ANKRD37), mRNA [NM_181726]
Q7Z7B1	PIGW	A_23_P379794	0.493	Homo sapiens phosphatidylinositol glycan, class W (PIGW), mRNA [NM_178517]
Q7Z7M8	B3GNT8	A_23_P101380	3.529	Homo sapiens UDP-Gal:betaGal beta 1,3-galactosyltransferase polypeptide 7 (B3GALT7), mRNA [NM_198540]
Q86SY8		A_32_P137399	0.169	human full-length cDNA clone CS0DK001YK16 of HeLa cells of Homo sapiens (human). [BX248296]
Q86T20	C6orf1	A_23_P81993	3.29	Homo sapiens chromosome 6 open reading frame 1 (C6orf1), transcript variant 1, mRNA [NM_178508]
Q86UC2	RSPH3	A_23_P59397	2.028	Homo sapiens radial spokehead-like 2 (RSHL2), mRNA [NM_031924]
Q86UD3	2017-03-03	A_23_P321511	0.436	Homo sapiens membrane-associated ring finger (C3HC4) 3 (MARCH3), mRNA [NM_178450]
Q86UE4	MTDH	A_23_P250196	0.404	Homo sapiens metadherin (MTDH), mRNA [NM_178812]
Q86UK7	ZNF598	A_23_P100292, A_23_P407684	0.427	Homo sapiens mRNA for FLJ00086 protein, partial cds. [AK024487],Homo sapiens zinc finger protein 598 (ZNF598), mRNA [NM_178167]
Q86UT6	NLRX1	A_24_P244356	2.347	Homo sapiens NOD9 protein (NOD9), transcript variant 2, mRNA [NM_170722]
Q86V20	FAM35A	A_23_P127279	0.444	Homo sapiens family with sequence similarity 35, member A (FAM35A), mRNA [NM_019054]
Q86VE9	SERINC5	A_24_P6381	0.159	Homo sapiens chromosome 5 open reading frame 12 (C5orf12), mRNA [NM_178276]
Q86VI4	LAPTM4B	A_24_P414999	0.463	Homo sapiens lysosomal associated protein transmembrane 4 beta (LAPTM4B), mRNA [NM_018407]
Q86VR8	FJX1	A_23_P150693	0.117	Homo sapiens four jointed box 1 (Drosophila) (FJX1), mRNA [NM_014344]
Q86WR7	PROSER2	A_23_P352402	0.481	Homo sapiens chromosome 10 open reading frame 47 (C10orf47), mRNA [NM_153256]
Q86X76	NIT1	A_23_P376661	2.135	Homo sapiens nitrilase 1 (NIT1), mRNA [NM_005600]
Q86XF0	DHFRL1	A_23_P139312	0.422	Homo sapiens dihydrofolate reductase-like 1 (DHFRL1), mRNA [NM_176815]
Q86XI6	PPP1R3B	A_24_P201064	3.214	Homo sapiens cDNA FLJ34675 fis, clone LIVER2001608. [AK091994]
Q86XS8	RNF130	A_23_P41734	3.072	Homo sapiens ring finger protein 130 (RNF130), mRNA [NM_018434]
Q86XT9	TMEM219	A_23_P77562	2.278	Homo sapiens hypothetical protein BC017488 (LOC124446), mRNA [NM_194280]
Q86Y22	COL23A1	A_23_P387031	2.007	Homo sapiens collagen, type XXIII, alpha 1 (COL23A1), mRNA [NM_173465]
Q86Y56	DNAAF5	A_23_P258689	0.451	Homo sapiens hypothetical protein FLJ20397 (FLJ20397), mRNA [NM_017802]
Q86YB7	ECHDC2	A_23_P200203	2.639	Homo sapiens enoyl Coenzyme A hydratase domain containing 2 (ECHDC2), mRNA [NM_018281]
Q86YM7	HOMER1	A_23_P41917	0.235	Homo sapiens homer homolog 1 (Drosophila) (HOMER1), mRNA [NM_004272]
Q86YS3	RAB11FIP4	A_23_P27023	4.795	Homo sapiens RAB11 family interacting protein 4 (class II) (RAB11FIP4), mRNA [NM_032932]
Q86YT9	JAML	A_24_P192914	13.62	Homo sapiens adhesion molecule, interacts with CXADR antigen 1 (AMICA1), mRNA [NM_153206]
Q86YV0	RASAL3	A_23_P79069	3.341	Homo sapiens mRNA for FLJ00087 protein, partial cds. [AK024488]
Q86YV5	SGK223	A_23_P250212	2.346	Homo sapiens mRNA for FLJ00269 protein. [AK122582]
Q8IU68	TMC8	A_23_P346093, A_23_P411246	2.396	Homo sapiens epidermodysplasia verruciformis 2 (EVER2), mRNA [NM_152468],Homo sapiens mRNA for FLJ00400 protein. [AK090478]
Q8IUF8	MINA	A_23_P91827	0.189	Homo sapiens MYC induced nuclear antigen (MINA), transcript variant 2, mRNA [NM_032778]
Q8IUX7	AEBP1	A_23_P157299	0.156	Homo sapiens AE binding protein 1 (AEBP1), mRNA [NM_001129]
Q8IV04	TBC1D10C	A_24_P392201	3.053	Homo sapiens TBC1 domain family, member 10C (TBC1D10C), mRNA [NM_198517]
Q8IV20	LACC1	A_23_P374315	3.465	Homo sapiens hypothetical protein FLJ38725 (FLJ38725), mRNA [NM_153218]
Q8IV53	DENND1C	A_23_P78608	2.093	Homo sapiens family with sequence similarity 31, member C (FAM31C), mRNA [NM_024898]
Q8IV56	PRR15	A_32_P154911	3.882	Homo sapiens hypothetical protein LOC222171 (LOC222171), mRNA [NM_175887]
Q8IVA1	PCP2	A_24_P399500	2.26	Homo sapiens Purkinje cell protein 2 (PCP2), mRNA [NM_174895]
Q8IVF6	ANKRD18A	A_32_P101490	0.305	Homo sapiens mRNA for KIAA2015 protein. [AB095935]
Q8IVS2	MCAT	A_23_P132358	0.471	Homo sapiens malonyl-CoA:acyl carrier protein transacylase, mitochondrial (MT), nuclear gene encoding mitochondrial protein, transcript variant 1, mRNA [NM_173467]
Q8IVW1	ARL17A, ARL17B	A_23_P207680	0.419	Homo sapiens ADP-ribosylation factor-like (LOC51326), mRNA [NM_016632]
Q8IVW6	ARID3B	A_23_P88580	2.356	Homo sapiens AT rich interactive domain 3B (BRIGHT- like) (ARID3B), mRNA [NM_006465]
Q8IWB1	ITPRIP	A_23_P340333	2.022	Homo sapiens KIAA1754 (KIAA1754), mRNA [NM_033397]
Q8IWK6	ADGRA3	A_23_P158925, A_23_P158933	0.4175	Homo sapiens G protein-coupled receptor 125 (GPR125), mRNA [NM_145290]
Q8IWU5	SULF2	A_23_P154605	86.86	Homo sapiens sulfatase 2 (SULF2), transcript variant 1, mRNA [NM_018837]
Q8IWW6	ARHGAP12	A_23_P149775	17.4	Homo sapiens Rho GTPase activating protein 12 (ARHGAP12), mRNA [NM_018287]
Q8IX19	MCEMP1	A_23_P330561	27.22	Homo sapiens hypothetical protein LOC199675 (LOC199675), mRNA [NM_174918]
Q8IX90	SKA3	A_23_P340909	0.454	Homo sapiens chromosome 13 open reading frame 3, mRNA (cDNA clone MGC:4832 IMAGE:3604003), complete cds. [BC013418]
Q8IXL6	FAM20C	A_23_P250122	13.06	Homo sapiens family with sequence similarity 20, member C (FAM20C), mRNA [NM_020223]
Q8IXT1	DDIAS	A_23_P429491	0.462	Homo sapiens hypothetical protein FLJ25416 (FLJ25416), mRNA [NM_145018]
Q8IXU6	SLC35F2	A_23_P339098	0.328	Homo sapiens solute carrier family 35, member F2 (SLC35F2), mRNA [NM_017515]
Q8IYB3	SRRM1	A_24_P264192	0.464	Homo sapiens serine/arginine repetitive matrix 1 (SRRM1), mRNA [NM_005839]
Q8IYB8	SUPV3L1	A_23_P63847	0.441	Homo sapiens suppressor of var1, 3-like 1 (S. cerevisiae) (SUPV3L1), mRNA [NM_003171]
Q8IYG6	LRRC56	A_23_P368996	2.828	Homo sapiens hypothetical protein DKFZp761L1518 (DKFZp761L1518), mRNA [NM_198075]
Q8IYK4	COLGALT2	A_24_P62505	0.152	Homo sapiens glycosyltransferase 25 domain containing 2 (GLT25D2), mRNA [NM_015101]
Q8IYN6	UBALD2	A_24_P194714	2.239	Homo sapiens hypothetical protein MGC29814 (MGC29814), mRNA [NM_182565]
Q8IYS1	PM20D2	A_32_P86118	0.414	Homo sapiens aminoacylase 1-like 2 (ACY1L2), mRNA [NM_001010853]
Q8IYS5	OSCAR	A_23_P50368	2.1	Homo sapiens osteoclast-associated receptor (OSCAR), transcript variant 1, mRNA [NM_206818]
Q8IZ02	LRRC34	A_23_P41194	0.461	Homo sapiens leucine rich repeat containing 34 (LRRC34), mRNA [NM_153353]
Q8IZF4	ADGRG5	A_23_P206290, A_23_P206293	3.086	Homo sapiens G protein-coupled receptor 114 (GPR114), mRNA [NM_153837]
Q8IZJ1	UNC5B	A_23_P52336	0.422	Homo sapiens unc-5 homolog B (C. elegans) (UNC5B), mRNA [NM_170744]
Q8IZL9	CDK20	A_23_P20752	0.464	Homo sapiens cell cycle related kinase (CCRK), transcript variant 1, mRNA [NM_178432]
Q8IZP1	TBC1D3	A_23_P164210	2.301	Homo sapiens TBC1 domain family, member 3 (TBC1D3), mRNA [NM_032258]
Q8IZR5	CMTM4	A_32_P84009	2.763	Homo sapiens chemokine-like factor super family 4 (CKLFSF4), transcript variant 1, mRNA [NM_178818]
Q8IZS6	TCTE3	A_32_P38286	2	Homo sapiens t-complex-associated-testis-expressed 3 (TCTE3), mRNA [NM_174910]
Q8N0V3	RBFA	A_23_P153086	0.475	Homo sapiens chromosome 18 open reading frame 22 (C18orf22), mRNA [NM_024805]
Q8N0W5	IQCK	A_23_P324523	0.228	Homo sapiens hypothetical protein MGC35048 (MGC35048), mRNA [NM_153208]
Q8N103	TAGAP	A_23_P253145, A_24_P354724	2.0905	Homo sapiens T-cell activation GTPase activating protein (TAGAP), transcript variant 2, mRNA [NM_054114]
Q8N128	FAM177A1	A_23_P322704	0.481	Homo sapiens chromosome 14 open reading frame 24 (C14orf24), mRNA [NM_173607]
Q8N157	AHI1	A_24_P38143	0.437	Homo sapiens Abelson helper integration site (AHI1), mRNA [NM_017651]
Q8N183	NDUFAF2	A_23_P345942, A_23_P360983, A_32_P49555	0.203	Homo sapiens Myc-induced mitochondria protein (mimitin), mRNA [NM_174889]
Q8N1F8	STK11IP	A_23_P321320	5.68	Homo sapiens serine/threonine kinase 11 interacting protein (STK11IP), mRNA [NM_052902]
Q8N1W2	ZNF710	A_24_P342328	2.847	Homo sapiens mRNA for FLJ00306 protein. [AK160373]
Q8N257	HIST3H2BB	A_23_P332992	2.338	Homo sapiens histone 3, H2bb (HIST3H2BB), mRNA [NM_175055]
Q8N268		A_32_P339640	0.493	Homo sapiens hypothetical protein FLJ33860 (FLJ33860), mRNA [NM_173644]
Q8N283	ANKRD35	A_23_P325690	26.94	Homo sapiens ankyrin repeat domain 35 (ANKRD35), mRNA [NM_144698]
Q8N292	GAPT	A_23_P402319, A_24_P303127	3.111	Homo sapiens hypothetical protein FLJ33641 (FLJ33641), mRNA [NM_152687]
Q8N2A8	PLD6	A_23_P360626	0.122	Homo sapiens similar to CG12314 gene product (LOC201164), mRNA [NM_178836]
Q8N2E6	TOR2A	A_23_P60534	2.501	Homo sapiens torsin family 2, member A (TOR2A), mRNA [NM_130459]
Q8N335	GPD1L	A_23_P318284	0.388	Homo sapiens glycerol-3-phosphate dehydrogenase 1-like (GPD1L), mRNA [NM_015141]
Q8N3I7	BBS5	A_24_P208452	0.246	Homo sapiens Bardet-Biedl syndrome 5 (BBS5), mRNA [NM_152384]
Q8N3Y3	GYLTL1B	A_23_P104617	0.246	Homo sapiens glycosyltransferase-like 1B (GYLTL1B), mRNA [NM_152312]
Q8N3Z6	ZCCHC7	A_24_P85026	0.481	Homo sapiens zinc finger, CCHC domain containing 7 (ZCCHC7), mRNA [NM_032226]
Q8N4L2	TMEM55A	A_23_P422083	3.194	Homo sapiens transmembrane protein 55A (TMEM55A), mRNA [NM_018710]
Q8N4N3	KLHL36	A_24_P184937	2.33	Homo sapiens mRNA for FLJ00127 protein. [AK074056]
Q8N4Q1	CHCHD4	A_23_P428849	0.486	Homo sapiens coiled-coil-helix-coiled-coil-helix domain containing 4 (CHCHD4), mRNA [NM_144636]
Q8N543	OGFOD1	A_23_P3775	0.429	Homo sapiens hypothetical protein FLJ10826 (FLJ10826), mRNA [NM_018233]
Q8N5G2	TMEM57	A_23_P170290	2.648	Homo sapiens transmembrane protein 57 (TMEM57), mRNA [NM_018202]
Q8N5H3	FAM89B	A_23_P124962	2.658	Homo sapiens Mouse Mammary Turmor Virus Receptor homolog 1 (MTVR1), mRNA [NM_152832]
Q8N5I9	C12orf45	A_23_P128532	0.495	Homo sapiens hypothetical protein MGC40397 (MGC40397), mRNA [NM_152318]
Q8N5J2	FAM63A	A_23_P160546	4.218	Homo sapiens family with sequence similarity 63, member A (FAM63A), mRNA [NM_018379]
Q8N755	PQLC3	A_23_P131375	2.038	Homo sapiens PQ loop repeat containing 3 (PQLC3), mRNA [NM_152391]
Q8N7B6	PACRGL	A_24_P311604	0.376	Homo sapiens hypothetical protein MGC29898 (MGC29898), mRNA [NM_145048]
Q8N7R7	CCNYL1	A_24_P659113	0.388	Homo sapiens hypothetical protein FLJ40432 (FLJ40432), mRNA [NM_152523]
Q8N8J7	C4orf32	A_24_P54863	0.304	Homo sapiens hypothetical protein FLJ39370 (FLJ39370), mRNA [NM_152400]
Q8N8R7	ARL14EP	A_24_P73036	0.481	Homo sapiens hypothetical protein FLJ38968 (FLJ38968), mRNA [NM_152316]
Q8N8V8	TMEM105	A_32_P919718	2.689	Homo sapiens hypothetical protein FLJ38792 (FLJ38792), mRNA [NM_178520]
Q8N999	C12orf29	A_23_P310068, A_32_P46765	0.3295	Homo sapiens hypothetical protein DKFZp434N2030 (DKFZp434N2030), mRNA [NM_001009894]
Q8N9Z2	CCDC71L	A_32_P170736	2.008	Homo sapiens cDNA FLJ25556 fis, clone JTH02629. [AK098422]
Q8NAA4	ATG16L2	A_23_P36305	3.045	Homo sapiens FLJ00012 protein (FLJ00012), mRNA [NM_033388]
Q8NB37	PDDC1	A_23_P330727	0.386	Homo sapiens hypothetical protein FLJ34283 (FLJ34283), mRNA [NM_182612]
Q8NBE8	KLHL23	A_23_P165408, A_23_P165414, A_24_P923102	0.239333	Homo sapiens kelch-like 23 (Drosophila) (KLHL23), mRNA [NM_144711],Homo sapiens kelch-like 23 (Drosophila), mRNA (cDNA clone IMAGE:3854163), complete cds. [BC016950]
Q8NBM8	PCYOX1L	A_23_P30275	4.398	Homo sapiens hypothetical protein MGC3265 (MGC3265), mRNA [NM_024028]
Q8NC51	SERBP1	A_23_P359111, A_32_P139079, A_32_P187599	0.436	Homo sapiens PAI-1 mRNA binding protein (PAI-RBP1), transcript variant 4, mRNA [NM_015640]
Q8NCA5	FAM98A	A_23_P313728, A_24_P119002	0.319	Homo sapiens DKFZP564F0522 protein (DKFZP564F0522), mRNA [NM_015475]
Q8NCE0	TSEN2	A_23_P92012	0.419	Homo sapiens tRNA splicing endonuclease 2 homolog (SEN2, S. cerevisiae) (TSEN2), mRNA [NM_025265]
Q8NCK3	ZNF485	A_23_P115861	0.394	Homo sapiens zinc finger protein 485 (ZNF485), mRNA [NM_145312]
Q8NCN2	ZBTB34	A_32_P194779	2.327	Homo sapiens mRNA for KIAA1993 protein. [AB082524]
Q8NCQ7	PROCA1	A_23_P427148	2.108	Homo sapiens proline-rich cyclin A1-interacting protein (PROCA1), mRNA [NM_152465]
Q8NCR0	B3GALNT2	A_23_P334751, A_24_P212531	0.4395	Homo sapiens UDP-GalNAc:betaGlcNAc beta 1,3-galactosaminyltransferase, polypeptide 2 (B3GALNT2), mRNA [NM_152490]
Q8ND25	ZNRF1	A_23_P163858, A_24_P16610, A_24_P193624, A_24_P262221	0.32925	Homo sapiens zinc and ring finger 1 (ZNRF1), mRNA [NM_032268]
Q8ND30	PPFIBP2	A_23_P150807	2.675	Homo sapiens PTPRF interacting protein, binding protein 2 (liprin beta 2) (PPFIBP2), mRNA [NM_003621]
Q8ND83	SLAIN1	A_23_P348146	0.419	Homo sapiens hypothetical protein FLJ30046 (FLJ30046), mRNA [NM_144595]
Q8NDF8	PAPD5	A_23_P118334	0.451	Homo sapiens PAP associated domain containing 5 (PAPD5), mRNA [NM_022447]
Q8NDN9	RCBTB1	A_23_P117163	2.146	Homo sapiens regulator of chromosome condensation (RCC1) and BTB (POZ) domain containing protein 1 (RCBTB1), mRNA [NM_018191]
Q8NE00	TMEM104	A_24_P284324	2.231	Homo sapiens cDNA FLJ20255 fis, clone COLF7072. [AK000262]
Q8NEB5	PLPP5	A_23_P322845	0.5	Homo sapiens HTPAP protein, mRNA (cDNA clone MGC:32924 IMAGE:5267610), complete cds. [BC033025]
Q8NEH6	MNS1	A_23_P3302	0.487	Homo sapiens meiosis-specific nuclear structural 1 (MNS1), mRNA [NM_018365]
Q8NES3	LFNG	A_23_P8452	3.458	Homo sapiens lunatic fringe homolog (Drosophila) (LFNG), mRNA [NM_002304]
Q8NEZ3	WDR19	A_24_P394361	0.35	Homo sapiens WD repeat domain 19 (WDR19), mRNA [NM_025132]
Q8NF50	DOCK8	A_32_P181077	2.185	Homo sapiens dedicator of cytokinesis 8 (DOCK8), mRNA [NM_203447]
Q8NF64	ZMIZ2	A_24_P29686	2.053	Homo sapiens hypothetical protein DKFZp761I2123 (DKFZp761I2123), transcript variant 1, mRNA [NM_031449]
Q8NG11	TSPAN14	A_24_P98613, A_32_P91902	3.652	Homo sapiens tetraspanin 14 (TSPAN14), mRNA [NM_030927]
Q8NG50	RDM1	A_23_P141447	2.084	Homo sapiens RAD52 homolog B (S. cerevisiae) (RAD52B), mRNA [NM_145654]
Q8NI22	MCFD2	A_23_P120270	0.473	Homo sapiens multiple coagulation factor deficiency 2 (MCFD2), mRNA [NM_139279]
Q8NI36	WDR36	A_23_P110598, A_24_P106357	0.383	Homo sapiens WD repeat domain 36 (WDR36), mRNA [NM_139281]
Q8NI99	ANGPTL6	A_23_P50276	3.213	Homo sapiens angiopoietin-like 6 (ANGPTL6), mRNA [NM_031917]
Q8TAD2	IL17D	A_23_P345692	0.427	Homo sapiens interleukin 17D (IL17D), mRNA [NM_138284]
Q8TAE8	GADD45GIP1	A_23_P39019	0.449	Homo sapiens growth arrest and DNA-damage-inducible, gamma interacting protein 1 (GADD45GIP1), mRNA [NM_052850]
Q8TAK6	OLIG1	A_23_P154849	3.627	Homo sapiens oligodendrocyte transcription factor 1 (OLIG1), mRNA [NM_138983]
Q8TAT2	FGFBP3	A_23_P417994, A_24_P201381	0.4005	Homo sapiens chromosome 10 open reading frame 13 (C10orf13), mRNA [NM_152429]
Q8TAW3	ZNF671	A_23_P50217	2.08	Homo sapiens zinc finger protein 671 (ZNF671), mRNA [NM_024833]
Q8TB37	NUBPL	A_23_P170908	0.323	Homo sapiens nucleotide binding protein-like (NUBPL), mRNA [NM_025152]
Q8TB45	DEPTOR	A_23_P60166	0.0926	Homo sapiens DEP domain containing 6 (DEPDC6), mRNA [NM_022783]
Q8TB68	PRR7	A_23_P30464, A_24_P20806	0.345	Homo sapiens proline rich 7 (synaptic) (PRR7), mRNA [NM_030567]
Q8TBF2	FAM213B	A_32_P84289	0.418	Homo sapiens chromosome 1 open reading frame 93 (C1orf93), mRNA [NM_152371]
Q8TCS8	PNPT1	A_23_P154488, A_32_P76035	0.2885	Homo sapiens mRNA; cDNA DKFZp762K1914 (from clone DKFZp762K1914). [CR749867],Homo sapiens polyribonucleotide nucleotidyltransferase 1 (PNPT1), mRNA [NM_033109]
Q8TCU6	PREX1	A_23_P413641	2.653	Homo sapiens phosphatidylinositol 3,4,5-trisphosphate-dependent RAC exchanger 1 (PREX1), mRNA [NM_020820]
Q8TCZ2	CD99L2	A_23_P253052	2.288	Homo sapiens CD99 antigen-like 2 (CD99L2), transcript variant 1, mRNA [NM_031462]
Q8TD22	SFXN5	A_24_P63030	2.994	Homo sapiens sideroflexin 5 (SFXN5), mRNA [NM_144579]
Q8TD30	GPT2	A_23_P37892, A_24_P193648	0.1605	Homo sapiens glutamic pyruvate transaminase (alanine aminotransferase) 2 (GPT2), mRNA [NM_133443]
Q8TD35	LKAAEAR1	A_23_P348524	0.223	Homo sapiens bA299N6.3 (LOC198437), mRNA [NM_001007125]
Q8TD55	PLEKHO2	A_23_P129246	4.432	Homo sapiens PH domain-containing protein (pp9099), mRNA [NM_025201]
Q8TDN4	CABLES1	A_23_P422851	3.132	Homo sapiens Cdk5 and Abl enzyme substrate 1 (CABLES1), mRNA [NM_138375]
Q8TDN6	BRIX1	A_23_P252857	0.388	Homo sapiens brix domain containing 2 (BXDC2), mRNA [NM_018321]
Q8TDQ1	CD300LF	A_23_P55020, A_24_P279307	3.301	Homo sapiens CD300 antigen like family member F (CD300LF), mRNA [NM_139018]
Q8TED0	UTP15	A_23_P213441	0.433	Homo sapiens Src-associated protein SAW (FLJ12787), mRNA [NM_032175]
Q8TEQ6	GEMIN5	A_23_P336513	0.224	Homo sapiens gem (nuclear organelle) associated protein 5 (GEMIN5), mRNA [NM_015465]
Q8TEZ7	PAQR8	A_23_P214281	3.995	Homo sapiens progestin and adipoQ receptor family member VIII (PAQR8), mRNA [NM_133367]
Q8TF62	ATP8B4	A_23_P163216	2.518	Homo sapiens ATPase, Class I, type 8B, member 4 (ATP8B4), mRNA [NM_024837]
Q8WTP8	AEN	A_23_P206077	0.314	Homo sapiens interferon stimulated exonuclease gene 20kDa-like 1 (ISG20L1), mRNA [NM_022767]
Q8WTT2	NOC3L	A_23_P202496	0.408	Homo sapiens chromosome 10 open reading frame 117 (C10orf117), mRNA [NM_022451]
Q8WU39	MZB1	A_23_P84596	0.124	Homo sapiens proapoptotic caspase adaptor protein (PACAP), mRNA [NM_016459]
Q8WUB2	FAM216A	A_23_P65000	0.337	Homo sapiens protein predicted by clone 23733 (HSU79274), mRNA [NM_013300]
Q8WUD6	CHPT1	A_23_P105571	0.286	Homo sapiens choline phosphotransferase 1 (CHPT1), mRNA [NM_020244]
Q8WUM9	SLC20A1	A_24_P103004	0.498	Homo sapiens solute carrier family 20 (phosphate transporter), member 1 (SLC20A1), mRNA [NM_005415]
Q8WUX1	SLC38A5	A_23_P84929	0.319	Homo sapiens solute carrier family 38, member 5 (SLC38A5), mRNA [NM_033518]
Q8WUX2	CHAC2	A_32_P194264	0.409	Homo sapiens similar to RIKEN cDNA 2510006C20 gene (LOC494143), mRNA [NM_001008708]
Q8WVE0	N6AMT2	A_23_P151368	0.469	Homo sapiens hypothetical protein LOC221143 (LOC221143), mRNA [NM_174928]
Q8WVM0	TFB1M	A_23_P93499	0.476	Homo sapiens transcription factor B1, mitochondrial (TFB1M), mRNA [NM_016020]
Q8WVV9	HNRNPLL	A_24_P225635	4.317	Q8IX05 (Q8IX05) C-type lectin BIMLEC precursor (Type I transmembrane C-type lectin receptor DCL-1), partial (6%) [THC2403280]
Q8WVX3	C4orf3	A_23_P388433	2.695	full-length cDNA clone CS0DI016YF21 of Placenta Cot 25-normalized of Homo sapiens (human). [CR597270]
Q8WW01	TSEN15	A_23_P104025	0.495	Homo sapiens chromosome 1 open reading frame 19 (C1orf19), mRNA [NM_052965]
Q8WWF1	C1orf54	A_23_P74778	5.26	Homo sapiens chromosome 1 open reading frame 54 (C1orf54), mRNA [NM_024579]
Q8WWI5	SLC44A1	A_23_P216630, A_24_P479510	9.5735	AGENCOURT_6542132 NIH_MGC_72 Homo sapiens cDNA clone IMAGE:5549436 5', mRNA sequence [BM550834],Homo sapiens CDW92 antigen (CDW92), transcript variant 2, mRNA [NM_080546]
Q8WWN8	ARAP3	A_23_P167389	7.954	Homo sapiens centaurin, delta 3 (CENTD3), mRNA [NM_022481]
Q8WWW8	GAB3	A_23_P255126	2.493	Homo sapiens GRB2-associated binding protein 3 (GAB3), mRNA [NM_080612]
Q8WXB1	METTL21A	A_23_P209337	0.406	Homo sapiens similar to hepatocellular carcinoma-associated antigen HCA557b (LOC151194), mRNA [NM_145280]
Q8WXX7	AUTS2	A_23_P122906	2.076	Homo sapiens autism susceptibility candidate 2 (AUTS2), mRNA [NM_015570]
Q8WY91	THAP4	A_23_P84782	0.447	Homo sapiens THAP domain containing 4 (THAP4), mRNA [NM_015963]
Q8WYH8	ING5	A_24_P34545	0.44	Homo sapiens inhibitor of growth family, member 5 (ING5), mRNA [NM_032329]
Q8WYP5	AHCTF1	A_23_P63584, A_24_P28657	0.4585	Homo sapiens AT hook containing transcription factor 1 (AHCTF1), mRNA [NM_015446]
Q92499	DDX1	A_23_P108554	0.429	Homo sapiens DEAD (Asp-Glu-Ala-Asp) box polypeptide 1 (DDX1), mRNA [NM_004939]
Q92503	SEC14L1	A_23_P206960	2.523	Homo sapiens SEC14-like 1 (S. cerevisiae) (SEC14L1), mRNA [NM_003003]
Q92508	PIEZO1	A_23_P140738	0.319	Homo sapiens family with sequence similarity 38, member A (FAM38A), mRNA [NM_014745]
Q92537	SUSD6	A_23_P371787	2.96	Homo sapiens KIAA0247 (KIAA0247), mRNA [NM_014734]
Q92551	IP6K1	A_23_P92202	0.49	Homo sapiens GDP-mannose pyrophosphorylase B (GMPPB), transcript variant 2, mRNA [NM_021971]
Q92562	FIG4	A_23_P145541	2.04	Homo sapiens KIAA0274 (KIAA0274), mRNA [NM_014845]
Q92622	RUBCN	A_23_P304171	3.156	Homo sapiens mRNA for KIAA0226 protein, partial cds. [D86979]
Q92681	RSC1A1	A_23_P395534	0.372	Homo sapiens regulatory solute carrier protein, family 1, member 1 (RSC1A1), mRNA [NM_006511]
Q92692	PVRL2	A_23_P208293	17.82	full-length cDNA clone CS0DI066YH20 of Placenta Cot 25-normalized of Homo sapiens (human). [CR611629]
Q92750	TAF4B	A_23_P95718	0.393	H.sapiens TAFII105 mRNA, partial. [Y09321]
Q92828	CORO2A	A_23_P135061	0.415	Homo sapiens coronin, actin binding protein, 2A (CORO2A), transcript variant 1, mRNA [NM_003389]
Q92844	TANK	A_23_P154306	3.087	Homo sapiens TRAF family member-associated NFKB activator (TANK), transcript variant 1, mRNA [NM_004180]
Q92870	APBB2	A_23_P10701	0.371	Homo sapiens amyloid beta (A4) precursor protein-binding, family B, member 2 (Fe65-like) (APBB2), mRNA [NM_173075]
Q92882	OSTF1	A_23_P60296	2.285	Homo sapiens osteoclast stimulating factor 1 (OSTF1), mRNA [NM_012383]
Q92922	SMARCC1	A_32_P112104	0.475	Homo sapiens SWI/SNF related, matrix associated, actin dependent regulator of chromatin, subfamily c, member 1 (SMARCC1), mRNA [NM_003074]
Q92930	RAB8B	A_23_P317465	3.308	Homo sapiens RAB8B, member RAS oncogene family (RAB8B), mRNA [NM_016530]
Q92956	TNFRSF14	A_23_P126908	3.713	Homo sapiens tumor necrosis factor receptor superfamily, member 14 (herpesvirus entry mediator) (TNFRSF14), mRNA [NM_003820]
Q92963	RIT1	A_23_P316601	2.034	Homo sapiens Ras-like without CAAX 1 (RIT1), mRNA [NM_006912]
Q92973	TNPO1	A_23_P156101	0.494	Homo sapiens transportin 1 (TNPO1), transcript variant 1, mRNA [NM_002270]
Q92982	NINJ1	A_23_P169137	3.136	Homo sapiens ninjurin 1 (NINJ1), mRNA [NM_004148]
Q92985	IRF7	A_24_P378019	2.639	Homo sapiens interferon regulatory factor 7 (IRF7), transcript variant d, mRNA [NM_004031]
Q92995	USP13	A_23_P40989	0.383	Homo sapiens ubiquitin specific protease 13 (isopeptidase T-3) (USP13), mRNA [NM_003940]
Q93050	ATP6V0A1	A_24_P333733	4.334	Homo sapiens ATPase, H+ transporting, lysosomal V0 subunit a isoform 1 (ATP6V0A1), mRNA [NM_005177]
Q93079	HIST1H2BH	A_23_P366216	3.311	Homo sapiens histone 1, H2bh (HIST1H2BH), mRNA [NM_003524]
Q95460	MR1	A_23_P201837, A_23_P431939, A_23_P74928	2.42767	Homo sapiens MHC class I related protein 1 isoform D (MR1D) mRNA, complete cds. [AF031469],Homo sapiens major histocompatibility complex, class I-related (MR1), mRNA [NM_001531]
Q969F1	GTF3C6	A_23_P400465	0.49	Homo sapiens chromosome 6 open reading frame 51 (C6orf51), mRNA [NM_138408]
Q969F2	NKD2	A_23_P41804	0.435	Homo sapiens naked cuticle homolog 2 (Drosophila) (NKD2), mRNA [NM_033120]
Q969G6	RFK	A_23_P216708, A_32_P218883	0.38	Homo sapiens riboflavin kinase (RFK), mRNA [NM_018339]
Q969K4	ABTB1	A_23_P109643	2.207	Homo sapiens ankyrin repeat and BTB (POZ) domain containing 1 (ABTB1), transcript variant 2, mRNA [NM_172027]
Q969X5	ERGIC1	A_23_P333218, A_23_P404871	0.3755	Homo sapiens endoplasmic reticulum-golgi intermediate compartment 32 kDa protein, mRNA (cDNA clone MGC:16233 IMAGE:3677787), complete cds. [BC012766]
Q969X6	UTP4	A_23_P54626, A_24_P25346	0.448	Homo sapiens cirrhosis, autosomal recessive 1A (cirhin) (CIRH1A), mRNA [NM_032830]
Q969Z4	RELT	A_23_P47735, A_24_P38951	2.6895	Homo sapiens tumor necrosis factor receptor superfamily, member 19-like (TNFRSF19L), transcript variant 1, mRNA [NM_032871]
Q96A26	FAM162A	A_23_P256542	0.493	Homo sapiens growth and transformation-dependent protein (E2IG5), mRNA [NM_014367]
Q96A33	CCDC47	A_24_P176733	0.456	Homo sapiens GK001 protein (GK001), mRNA [NM_020198]
Q96A35	MRPL24	A_23_P137848	0.466	Homo sapiens mitochondrial ribosomal protein L24 (MRPL24), nuclear gene encoding mitochondrial protein, transcript variant 1, mRNA [NM_145729]
Q96A37	RNF166	A_23_P385500, A_23_P416242	2.4995	Homo sapiens ring finger protein 166 (RNF166), mRNA [NM_178841]
Q96A49	SYAP1	A_23_P83939	0.467	Homo sapiens synapse associated protein 1, SAP47 homolog (Drosophila) (SYAP1), mRNA [NM_032796]
Q96A72	MAGOHB	A_23_P2423, A_24_P828949	0.435	Homo sapiens mago-nashi homolog (FLJ10292), mRNA [NM_018048]
Q96A73	KIAA1191	A_32_P51905	2.276	Homo sapiens KIAA1191 protein (KIAA1191), mRNA [NM_020444]
Q96AB3	ISOC2	A_23_P153418	0.455	Homo sapiens isochorismatase domain containing 2 (ISOC2), mRNA [NM_024710]
Q96AG4	LRRC59	A_24_P181585	0.478	Homo sapiens hypothetical protein PRO1855 (PRO1855), mRNA [NM_018509]
Q96AQ6	PBXIP1	A_24_P79808	2.743	Homo sapiens pre-B-cell leukemia transcription factor interacting protein 1 (PBXIP1), mRNA [NM_020524]
Q96AW1	VOPP1	A_23_P168211	2.205	Homo sapiens EGFR-coamplified and overexpressed protein (ECOP), mRNA [NM_030796]
Q96AX2	RAB37	A_23_P414654	10.47	Homo sapiens RAB37, member RAS oncogene family (RAB37), mRNA [NM_175738]
Q96BD0	SLCO4A1	A_23_P5903	0.456	Homo sapiens solute carrier organic anion transporter family, member 4A1 (SLCO4A1), mRNA [NM_016354]
Q96BD5	PHF21A	A_23_P359015	2.242	Homo sapiens PHD finger protein 21A (PHF21A), mRNA [NM_016621]
Q96BF6	NACC2	A_23_P113825	0.271	Homo sapiens BTB (POZ) domain containing 14A (BTBD14A), mRNA [NM_144653]
Q96BK5	PINX1	A_23_P82823	0.423	Homo sapiens PIN2-interacting protein 1 (PINX1), mRNA [NM_017884]
Q96BM9	ARL8A	A_23_P138271	2.257	Homo sapiens ADP-ribosylation factor-like 10B (ARL10B), mRNA [NM_138795]
Q96BT7	ALKBH8	A_23_P371876	0.484	Homo sapiens hypothetical protein BC015183 (LOC91801), mRNA [NM_138775]
Q96BY6	DOCK10	A_23_P16722	3.111	Homo sapiens dedicator of cytokinesis 10 (DOCK10), mRNA [NM_014689]
Q96C10	DHX58	A_23_P38346	3.645	Homo sapiens likely ortholog of mouse D11lgp2 (LGP2), mRNA [NM_024119]
Q96C23	GALM	A_23_P67971	8.381	Homo sapiens galactose mutarotase (aldose 1-epimerase) (GALM), mRNA [NM_138801]
Q96C74	ROPN1L	A_32_P335921	0.497	Homo sapiens ropporin 1-like (ROPN1L), mRNA [NM_031916]
Q96CN7	ISOC1	A_23_P250982	0.307	Homo sapiens isochorismatase domain containing 1 (ISOC1), mRNA [NM_016048]
Q96CP7	TLCD1	A_23_P420417	0.474	Homo sapiens hypothetical protein BC014072 (LOC116238), mRNA [NM_138463]
Q96CW9	NTNG2	A_23_P423331	2.138	Homo sapiens netrin G2 (NTNG2), mRNA [NM_032536]
Q96DE0	NUDT16	A_23_P310560	2.399	Homo sapiens nudix (nucleoside diphosphate linked moiety X)-type motif 16 (NUDT16), mRNA [NM_152395]
Q96DP5	MTFMT	A_23_P117727	0.306	Homo sapiens mitochondrial methionyl-tRNA formyltransferase (MTFMT), mRNA [NM_139242]
Q96DT0	LGALS12	A_23_P139198	2.807	Homo sapiens lectin, galactoside-binding, soluble, 12 (galectin 12) (LGALS12), mRNA [NM_033101]
Q96E29	MTERF3	A_24_P243834	0.451	Homo sapiens MTERF domain containing 1 (MTERFD1), mRNA [NM_015942]
Q96E35	ZMYND19	A_24_P158385	0.39	Homo sapiens zinc finger, MYND-type containing 19 (ZMYND19), mRNA [NM_138462]
Q96EE3	SEH1L	A_23_P78311, A_24_P407930	0.4395	Homo sapiens SEH1-like (S. cerevisiae) (SEH1L), transcript variant 2, mRNA [NM_031216]
Q96EH3	MALSU1	A_23_P145817	0.493	Homo sapiens chromosome 7 open reading frame 30 (C7orf30), mRNA [NM_138446]
Q96EH5	RPL39L	A_23_P29594	0.236	Homo sapiens ribosomal protein L39-like (RPL39L), mRNA [NM_052969]
Q96EK6	GNPNAT1	A_23_P429184, A_24_P943040	0.1805	Homo sapiens glucosamine-phosphate N-acetyltransferase 1 (GNPNAT1), mRNA [NM_198066]
Q96F05	C11orf24	A_23_P12911	0.459	Homo sapiens chromosome 11 open reading frame 24 (C11orf24), mRNA [NM_022338]
Q96F25	ALG14	A_23_P257423	0.303	Homo sapiens hypothetical protein MGC19780 (MGC19780), mRNA [NM_144988]
Q96F46	IL17RA	A_32_P103815	2.615	Homo sapiens cDNA FLJ32274 fis, clone PROST2000036. [AK056836]
Q96FL9	GALNT14	A_23_P67847	0.18	Homo sapiens UDP-N-acetyl-alpha-D-galactosamine:polypeptide N-acetylgalactosaminyltransferase 14 (GalNAc-T14) (GALNT14), mRNA [NM_024572]
Q96FX2	DPH3	A_23_P69188	0.493	Homo sapiens zinc finger, CSL-type containing 2 (ZCSL2), mRNA [NM_206831]
Q96G27	WBP1	A_23_P252808	2.746	Homo sapiens WW domain binding protein 1 (WBP1), mRNA [NM_012477]
Q96GA7	SDSL	A_23_P53439	5.211	Homo sapiens serine dehydratase-like (SDSL), mRNA [NM_138432]
Q96GS4	BORCS6	A_23_P152955	2.095	Homo sapiens hypothetical protein FLJ20014 (FLJ20014), mRNA [NM_017622]
Q96HC4	PDLIM5	A_32_P14610	2.269	Homo sapiens PDZ and LIM domain 5 (PDLIM5), transcript variant 1, mRNA [NM_006457]
Q96HE7	ERO1A	A_23_P106145, A_24_P407311	0.397	Homo sapiens ERO1-like (S. cerevisiae) (ERO1L), mRNA [NM_014584]
Q96HJ3	CCDC34	A_24_P195831	0.367	Homo sapiens NY-REN-41 antigen (NY-REN-41), transcript variant 1, mRNA [NM_030771]
Q96HJ5	MS4A3	A_23_P161909	2.112	Homo sapiens membrane-spanning 4-domains, subfamily A, member 3 (hematopoietic cell-specific) (MS4A3), mRNA [NM_006138]
Q96HP4	OXNAD1	A_23_P91991	0.426	Homo sapiens hypothetical protein BC008322 (MGC15763), mRNA [NM_138381]
Q96HS1	PGAM5	A_23_P319719	0.375	Homo sapiens Bcl-XL-binding protein v68 (MGC5352), mRNA [NM_138575]
Q96HZ4	HES6	A_23_P131202	0.483	Homo sapiens hairy and enhancer of split 6 (Drosophila) (HES6), mRNA [NM_018645]
Q96I59	NARS2	A_23_P24960	0.492	Homo sapiens hypothetical protein FLJ23441 (FLJ23441), mRNA [NM_024678]
Q96IR7	HPDL	A_23_P74449	0.283	Homo sapiens glyoxalase domain containing 1 (GLOXD1), mRNA [NM_032756]
Q96IU2	ZBED3	A_23_P93032	0.308	Homo sapiens zinc finger, BED-type containing 3 (ZBED3), mRNA [NM_032367]
Q96IZ6	METTL2A	A_23_P59836, A_32_P725218	0.415	Homo sapiens hypothetical protein FLJ12760 (FLJ12760), mRNA [NM_001005372],Homo sapiens methyltransferase like 2 (METTL2), mRNA [NM_018396]
Q96JJ3	ELMO2	A_24_P322635	2.299	Homo sapiens engulfment and cell motility 2 (ced-12 homolog, C. elegans) (ELMO2), transcript variant 3, mRNA [NM_182764]
Q96KV7	WDR90	A_23_P373992, A_23_P411833	0.328	Homo sapiens similar to RIKEN cDNA 3230401M21 [Mus musculus] (LOC197336), mRNA [NM_145294]
Q96LR5	UBE2E2	A_32_P155506	0.438	Homo sapiens ubiquitin-conjugating enzyme E2E 2 (UBC4/5 homolog, yeast) (UBE2E2), mRNA [NM_152653]
Q96M27	PRRC1	A_23_P92948	0.484	Homo sapiens hypothetical protein MGC12103 (LOC133619), mRNA [NM_130809]
Q96MF2	STAC3	A_23_P10947	2.363	Homo sapiens SH3 and cysteine rich domain 3 (STAC3), mRNA [NM_145064]
Q96MH7	C5orf34	A_23_P403081	0.466	Homo sapiens FLJ32363 protein (FLJ32363), mRNA [NM_198566]
Q96MT1	RNF145	A_23_P167559	2.216	Homo sapiens hypothetical protein FLJ31951 (FLJ31951), mRNA [NM_144726]
Q96MX6	WDR92	A_32_P165113	0.466	Homo sapiens hypothetical protein BC014022 (LOC116143), mRNA [NM_138458]
Q96N66	MBOAT7	A_23_P208516	2.721	Homo sapiens leukocyte receptor cluster (LRC) member 4 (LENG4), mRNA [NM_024298]
Q96ND0	FAM210A	A_23_P380978	0.445	Homo sapiens chromosome 18 open reading frame 19 (C18orf19), mRNA [NM_152352]
Q96NS5	ASB16	A_24_P56837	2.723	Homo sapiens ankyrin repeat and SOCS box-containing 16 (ASB16), mRNA [NM_080863]
Q96NW4	ANKRD27	A_23_P153640	0.371	Homo sapiens ankyrin repeat domain 27 (VPS9 domain) (ANKRD27), mRNA [NM_032139]
Q96P16	RPRD1A	A_23_P55639	0.466	Homo sapiens hypothetical protein FLJ10656 (P15RS), mRNA [NM_018170]
Q96P48	ARAP1	A_23_P105184, A_24_P398432	3.8545	Homo sapiens centaurin, delta 2 (CENTD2), transcript variant 1, mRNA [NM_139181]
Q96PZ0	PUS7	A_23_P82478, A_24_P106728	0.384	Homo sapiens hypothetical protein FLJ20485 (FLJ20485), mRNA [NM_019042]
Q96PZ2	FAM111A	A_23_P203332, A_24_P141629	2.212	Homo sapiens FLJ22794 protein (FLJ22794), transcript variant 1, mRNA [NM_022074]
Q96Q27	ASB2	A_23_P205370	10.53	Homo sapiens ankyrin repeat and SOCS box-containing 2 (ASB2), mRNA [NM_016150]
Q96Q42	ALS2	A_23_P209430, A_23_P377664	0.306	Homo sapiens ALS2 mRNA, complete cds, short form. [AB053306],Homo sapiens amyotrophic lateral sclerosis 2 (juvenile) (ALS2), mRNA [NM_020919]
Q96Q80	DERL3	A_23_P6362	0.447	Homo sapiens Der1-like domain family, member 3 (DERL3), transcript variant 1, mRNA [NM_198440]
Q96QD5	DEPDC7	A_23_P385126	0.153	Homo sapiens novel 58.3 KDA protein (LOC91614), mRNA [NM_139160]
Q96QD9	FYTTD1	A_23_P80827	2.883	Homo sapiens forty-two-three domain containing 1 (FYTTD1), transcript variant 2, mRNA [NM_001011537]
Q96QH2	PRAM1	A_23_P165219	2.632	Homo sapiens PML-RARA regulated adaptor molecule 1 (PRAM1), mRNA [NM_032152]
Q96QP1	ALPK1	A_23_P133133	2.401	Homo sapiens alpha-kinase 1 (ALPK1), mRNA [NM_025144]
Q96RK1	CITED4	A_32_P209230	0.14	Homo sapiens Cbp/p300-interacting transactivator, with Glu/Asp-rich carboxy-terminal domain, 4 (CITED4), mRNA [NM_133467]
Q96RR1	C10orf2	A_23_P138461, A_24_P258073	0.379	Homo sapiens progressive external ophthalmoplegia 1 (PEO1), mRNA [NM_021830]
Q96RU7	TRIB3	A_23_P210690	0.346	Homo sapiens tribbles homolog 3 (Drosophila) (TRIB3), mRNA [NM_021158]
Q96S44	TP53RK	A_23_P109055	0.466	Homo sapiens TP53 regulating kinase (TP53RK), mRNA [NM_033550]
Q96S66	CLCC1	A_23_P74809	0.493	Homo sapiens Mid-1-related chloride channel 1 (MCLC), mRNA [NM_015127]
Q96S97	MYADM	A_23_P27584	2.003	Homo sapiens myeloid-associated differentiation marker (MYADM), transcript variant 1, mRNA [NM_001020818]
Q96SI9	STRBP	A_23_P252155	0.377	Homo sapiens spermatid perinuclear RNA binding protein (STRBP), mRNA [NM_018387]
Q96SK2	TMEM209	A_23_P122805	0.487	Homo sapiens hypothetical protein FLJ14803 (FLJ14803), mRNA [NM_032842]
Q96SK3	ZNF607	A_23_P27810	0.495	Homo sapiens zinc finger protein 607 (ZNF607), mRNA [NM_032689]
Q96T52	IMMP2L	A_32_P87872	0.39	Homo sapiens IMP2 inner mitochondrial membrane protease-like (S. cerevisiae) (IMMP2L), mRNA [NM_032549]
Q96T66	NMNAT3	A_24_P260134	0.312	Homo sapiens nicotinamide nucleotide adenylyltransferase 3 (NMNAT3), mRNA [NM_178177]
Q96T88	UHRF1	A_32_P101235	0.482	Homo sapiens ubiquitin-like, containing PHD and RING finger domains, 1 (UHRF1), mRNA [NM_013282]
Q99439	CNN2	A_23_P16673, A_24_P142743	2.203	Homo sapiens calponin 2 (CNN2), transcript variant 1, mRNA [NM_004368]
Q99471	PFDN5	A_23_P128192	2.316	Homo sapiens prefoldin 5 (PFDN5), transcript variant 2, mRNA [NM_145896]
Q99519	NEU1	A_24_P394533	3.114	Homo sapiens sialidase 1 (lysosomal sialidase) (NEU1), mRNA [NM_000434]
Q99547	MPHOSPH6	A_23_P140848	0.497	Homo sapiens M-phase phosphoprotein 6 (MPHOSPH6), mRNA [NM_005792]
Q99567	NUP88	A_23_P152919	0.447	Homo sapiens nucleoporin 88kDa (NUP88), mRNA [NM_002532]
Q99575	POP1	A_23_P341275, A_23_P94133, A_24_P943000	0.375667	Homo sapiens KIAA0061 mRNA, partial cds. [D31765],Homo sapiens processing of precursor 1, ribonuclease P/MRP subunit (S. cerevisiae) (POP1), mRNA [NM_015029]
Q99612	KLF6	A_23_P63798	2.003	Homo sapiens Kruppel-like factor 6 (KLF6), transcript variant 2, mRNA [NM_001300]
Q99622	C12orf57	A_23_P350551	2.259	Homo sapiens likely ortholog of mouse gene rich cluster, C10 gene (GRCC10), mRNA [NM_138425]
Q99653	CHP1	A_23_P112801	2.003	Homo sapiens calcium binding protein P22 (CHP), mRNA [NM_007236]
Q99678	GPR20	A_23_P159237	7.727	Homo sapiens mRNA for G protein-coupled receptor 20 variant protein. [AB209066]
Q99698	LYST	A_23_P354074	2.127	Homo sapiens lysosomal trafficking regulator (LYST), transcript variant 1, mRNA [NM_000081]
Q99704	DOK1	A_23_P5601, A_23_P5610	2.622	Homo sapiens docking protein 1, 62kDa (downstream of tyrosine kinase 1) (DOK1), mRNA [NM_001381]
Q99708	RBBP8	A_23_P252371	0.497	Homo sapiens retinoblastoma binding protein 8 (RBBP8), transcript variant 1, mRNA [NM_002894]
Q99732	LITAF	A_23_P3532	4.256	Homo sapiens lipopolysaccharide-induced TNF factor (LITAF), mRNA [NM_004862]
Q99759	MAP3K3	A_23_P207131, A_23_P207138	2.1855	Homo sapiens mitogen-activated protein kinase kinase kinase 3 (MAP3K3), transcript variant 1, mRNA [NM_203351]
Q99797	MIPEP	A_23_P117274	0.208	Homo sapiens mitochondrial intermediate peptidase (MIPEP), nuclear gene encoding mitochondrial protein, mRNA [NM_005932]
Q99832	CCT7	A_23_P102404	0.495	Homo sapiens chaperonin containing TCP1, subunit 7 (eta) (CCT7), transcript variant 1, mRNA [NM_006429]
Q99836	MYD88	A_23_P362659	6.653	Homo sapiens myeloid differentiation primary response gene (88) (MYD88), mRNA [NM_002468]
Q99871	HAUS7	A_23_P416034	0.461	Homo sapiens 26S proteasome-associated UCH interacting protein 1 (UIP1), transcript variant 3, mRNA [NM_207106]
Q99877	HIST1H2BN	A_23_P402081	2.401	Homo sapiens histone 1, H2bn (HIST1H2BN), mRNA [NM_003520]
Q99879	HIST1H2BM	A_24_P3783	2.592	Homo sapiens histone 1, H2bm (HIST1H2BM), mRNA [NM_003521]
Q99880	HIST1H2BL	A_23_P402081, A_23_P8013	2.7435	Homo sapiens histone 1, H2bl (HIST1H2BL), mRNA [NM_003519],Homo sapiens histone 1, H2bn (HIST1H2BN), mRNA [NM_003520]
Q99952	PTPN18	A_23_P210015, A_24_P80135	2.4595	Homo sapiens protein tyrosine phosphatase, non-receptor type 18 (brain-derived) (PTPN18), mRNA [NM_014369],full-length cDNA clone CS0DK007YM08 of HeLa cells Cot 25-normalized of Homo sapiens (human). [CR616748]
Q99973	TEP1	A_23_P65481	2.402	Homo sapiens telomerase-associated protein 1 (TEP1), mRNA [NM_007110]
Q9BQ50	TREX2	A_23_P416034	0.461	Homo sapiens 26S proteasome-associated UCH interacting protein 1 (UIP1), transcript variant 3, mRNA [NM_207106]
Q9BQ69	MACROD1	A_23_P86855	0.315	Homo sapiens LRP16 protein (LRP16), mRNA [NM_014067]
Q9BQ75	CMSS1	A_23_P132874	0.245	Homo sapiens hypothetical protein MGC4308 (MGC4308), mRNA [NM_032359]
Q9BQ89	FAM110A	A_23_P386241	2.092	Homo sapiens chromosome 20 open reading frame 55 (C20orf55), transcript variant 2, mRNA [NM_207121]
Q9BQA1	WDR77	A_23_P115149	0.46	Homo sapiens WD repeat domain 77 (WDR77), mRNA [NM_024102]
Q9BQC3	DPH2	A_23_P126426, A_24_P393844	0.3945	Homo sapiens DPH2 homolog (S. cerevisiae) (DPH2), transcript variant 1, mRNA [NM_001384]
Q9BQF6	SENP7	A_24_P265856	2.331	Homo sapiens SUMO1/sentrin specific protease 7 (SENP7), mRNA [NM_020654]
Q9BQG0	MYBBP1A	A_23_P78170	0.315	Homo sapiens MYB binding protein (P160) 1a (MYBBP1A), mRNA [NM_014520]
Q9BQS8	FYCO1	A_23_P212339	0.416	Homo sapiens FYVE and coiled-coil domain containing 1 (FYCO1), mRNA [NM_024513]
Q9BQY9	DBNDD2	A_23_P28772	2.3	Homo sapiens chromosome 20 open reading frame 35 (C20orf35), mRNA [NM_018478]
Q9BRP1	PDCD2L	A_23_P27947	0.314	Homo sapiens hypothetical protein MGC13096 (MGC13096), mRNA [NM_032346]
Q9BRQ5	ORAI3	A_23_P106898	2.831	Homo sapiens hypothetical protein MGC13024 (MGC13024), mRNA [NM_152288]
Q9BRR9	ARHGAP9	A_23_P64661	5.874	Homo sapiens Rho GTPase activating protein 9 (ARHGAP9), mRNA [NM_032496]
Q9BRS2	RIOK1	A_24_P93798	0.34	Homo sapiens RIO kinase 1 (yeast) (RIOK1), transcript variant 1, mRNA [NM_031480]
Q9BRU9	UTP23	A_23_P157679	0.47	Homo sapiens hypothetical protein MGC14595 (MGC14595), mRNA [NM_032334]
Q9BSJ8	ESYT1	A_23_P150852	0.424	Homo sapiens family with sequence similarity 62 (C2 domain containing), member A (FAM62A), mRNA [NM_015292]
Q9BSU1	C16orf70	A_23_P206382	2.162	Homo sapiens lin-10 protein homolog (Lin10), mRNA [NM_025187]
Q9BSV6	TSEN34	A_23_P130626	3.058	Homo sapiens tRNA splicing endonuclease 34 homolog (SEN34, S. cerevisiae) (TSEN34), mRNA [NM_024075]
Q9BT09	CNPY3	A_23_P19352, A_24_P277747	2.2905	Homo sapiens trinucleotide repeat containing 5 (TNRC5), transcript variant 1, mRNA [NM_006586]
Q9BTE7	DCUN1D5	A_23_P127533	0.445	Homo sapiens hypothetical protein MGC2714 (MGC2714), mRNA [NM_032299]
Q9BTX1	NDC1	A_23_P73982	0.49	Homo sapiens transmembrane protein 48 (TMEM48), mRNA [NM_018087]
Q9BUN1	C1orf56	A_24_P234116	3.282	Homo sapiens chromosome 1 open reading frame 56 (C1orf56), mRNA [NM_017860]
Q9BUR5	APOO	A_23_P61127	0.409	Homo sapiens hypothetical protein MGC4825 (MGC4825), mRNA [NM_024122]
Q9BUV0	RSRP1	A_24_P2584	2.369	Homo sapiens chromosome 1 open reading frame 63, transcript variant 2, mRNA (cDNA clone MGC:1827 IMAGE:3534629), complete cds. [BC001892]
Q9BV38	WDR18	A_23_P5115	0.487	Homo sapiens WD repeat domain 18 (WDR18), mRNA [NM_024100]
Q9BVA0	KATNB1	A_23_P117980	0.48	Homo sapiens katanin p80 (WD repeat containing) subunit B 1 (KATNB1), mRNA [NM_005886]
Q9BVJ6	UTP14A	A_24_P170538	0.494	Homo sapiens UTP14, U3 small nucleolar ribonucleoprotein, homolog A (yeast) (UTP14A), mRNA [NM_006649]
Q9BVM2	DPCD	A_23_P52286	0.28	Homo sapiens deleted in a mouse model of primary ciliary dyskinesia (RP11-529I10.4), mRNA [NM_015448]
Q9BVP2	GNL3	A_23_P41025	0.417	Homo sapiens guanine nucleotide binding protein-like 3 (nucleolar) (GNL3), transcript variant 1, mRNA [NM_014366]
Q9BVW5	TIPIN	A_23_P99930	0.304	Homo sapiens timeless-interacting protein (FLJ20516), mRNA [NM_017858]
Q9BWT1	CDCA7	A_23_P251421, A_24_P171549	0.3605	Homo sapiens cell division cycle associated 7 (CDCA7), transcript variant 1, mRNA [NM_031942]
Q9BWT6	MND1	A_23_P133123	0.48	Homo sapiens GAJ protein (GAJ), mRNA [NM_032117]
Q9BWW8	APOL6	A_24_P941167	3.079	Homo sapiens apolipoprotein L, 6, mRNA (cDNA clone MGC:57495 IMAGE:5498605), complete cds. [BC047864]
Q9BX69	CARD6	A_23_P41854	2.967	Homo sapiens caspase recruitment domain family, member 6 (CARD6), mRNA [NM_032587]
Q9BXA5	SUCNR1	A_23_P69171	7.548	Homo sapiens succinate receptor 1 (SUCNR1), mRNA [NM_033050]
Q9BXJ9	NAA15	A_23_P212825	0.489	Homo sapiens NMDA receptor regulated 1 (NARG1), mRNA [NM_057175]
Q9BXM8		A_32_P128558	0.362	Homo sapiens colon cancer-associated antigen AgSK1-2HT-ECS mRNA, complete cds. [AF316855]
Q9BXR0	QTRT1	A_24_P96234	0.378	Homo sapiens queuine tRNA-ribosyltransferase 1 (tRNA-guanine transglycosylase) (QTRT1), mRNA [NM_031209]
Q9BY50	SEC11C	A_23_P208009	0.486	Homo sapiens SEC11-like 3 (S. cerevisiae) (SEC11L3), mRNA [NM_033280]
Q9BYD3	MRPL4	A_23_P164702	0.435	Homo sapiens mitochondrial ribosomal protein L4 (MRPL4), nuclear gene encoding mitochondrial protein, transcript variant 1, mRNA [NM_015956]
Q9BYN8	MRPS26	A_23_P252536	0.483	Homo sapiens mitochondrial ribosomal protein S26 (MRPS26), nuclear gene encoding mitochondrial protein, mRNA [NM_030811]
Q9BYT1	SLC17A9	A_23_P210361	0.316	Homo sapiens chromosome 20 open reading frame 59 (C20orf59), mRNA [NM_022082]
Q9BYT3	STK33	A_23_P127915	0.498	Homo sapiens serine/threonine kinase 33 (STK33), mRNA [NM_030906]
Q9BYT8	NLN	A_23_P133216, A_32_P99690	0.344	Homo sapiens neurolysin (metallopeptidase M3 family) (NLN), mRNA [NM_020726],UI-E-CQ1-afy-b-13-0-UI.r1 UI-E-CQ1 Homo sapiens cDNA clone UI-E-CQ1-afy-b-13-0-UI 5', mRNA sequence [BM709498]
Q9BZD2	SLC29A3	A_23_P46871	2.545	Homo sapiens solute carrier family 29 (nucleoside transporters), member 3 (SLC29A3), mRNA [NM_018344]
Q9BZL3	SMIM3	A_23_P414273	3.77	Homo sapiens putative small membrane protein NID67 (NID67), mRNA [NM_032947]
Q9BZR9	TRIM8	A_23_P46844	2.06	Homo sapiens tripartite motif-containing 8 (TRIM8), mRNA [NM_030912]
Q9C037	TRIM4	A_23_P500601	2.19	Homo sapiens tripartite motif-containing 4 (TRIM4), transcript variant alpha, mRNA [NM_033017]
Q9C073	FAM117A	A_23_P78053	2.435	Homo sapiens C/EBP-induced protein (LOC81558), mRNA [NM_030802]
Q9C0C4	SEMA4C	A_23_P114057	18.16	Homo sapiens sema domain, immunoglobulin domain (Ig), transmembrane domain (TM) and short cytoplasmic domain, (semaphorin) 4C (SEMA4C), mRNA [NM_017789]
Q9C0D9	EPT1	A_24_P940803	0.422	Homo sapiens selenoprotein I (SELI), mRNA [NM_033505]
Q9GZL7	WDR12	A_23_P28625	0.367	Homo sapiens WD repeat domain 12 (WDR12), mRNA [NM_018256]
Q9GZR2	REXO4	A_23_P157861	0.42	Homo sapiens XPMC2 prevents mitotic catastrophe 2 homolog (Xenopus laevis) (XPMC2H), mRNA [NM_020385]
Q9GZS1	POLR1E	A_23_P9458	0.367	Homo sapiens polymerase (RNA) I associated factor 1 (PRAF1), mRNA [NM_022490]
Q9GZT3	SLIRP	A_23_P128991	0.47	Homo sapiens chromosome 14 open reading frame 156 (C14orf156), mRNA [NM_031210]
Q9H008	LHPP	A_23_P75299	2.893	Homo sapiens phospholysine phosphohistidine inorganic pyrophosphate phosphatase (LHPP), mRNA [NM_022126]
Q9H078	CLPB	A_23_P75978	0.425	Homo sapiens suppressor of potassium transport defect 3 (SKD3), mRNA [NM_030813]
Q9H089	LSG1	A_24_P148657	0.452	Homo sapiens hypothetical protein FLJ11301 (FLJ11301), mRNA [NM_018385]
Q9H098	FAM107B	A_23_P149975	2.396	Homo sapiens chromosome 10 open reading frame 45 (C10orf45), mRNA [NM_031453]
Q9H0H3	KLHL25	A_23_P65797	0.41	Homo sapiens BTB/POZ KELCH domain protein (ENC2), mRNA [NM_022480]
Q9H0R5	GBP3	A_24_P370702	4.954	Homo sapiens guanylate binding protein 3 (GBP3), mRNA [NM_018284]
Q9H0Z9	RBM38	A_23_P17430	0.162	Homo sapiens RNA-binding region (RNP1, RRM) containing 1 (RNPC1), transcript variant 1, mRNA [NM_017495]
Q9H165	BCL11A	A_24_P411186	0.246	Homo sapiens B-cell CLL/lymphoma 11A (zinc finger protein) (BCL11A), transcript variant 1, mRNA [NM_022893]
Q9H1C7	CYSTM1	A_23_P259506	2.934	Homo sapiens putative nuclear protein ORF1-FL49 (ORF1-FL49), mRNA [NM_032412]
Q9H1U4	MEGF9	A_32_P129894	5.461	Homo sapiens mRNA for MEGF9, partial cds. [AB011542]
Q9H299	SH3BGRL3	A_23_P126388	2.456	Homo sapiens SH3 domain binding glutamic acid-rich protein like 3 (SH3BGRL3), mRNA [NM_031286]
Q9H2I8	C10orf11	A_23_P113034	2.54	Homo sapiens chromosome 10 open reading frame 11 (C10orf11), mRNA [NM_032024]
Q9H2L5	RASSF4	A_24_P295590	4.204	Homo sapiens Ras association (RalGDS/AF-6) domain family 4 (RASSF4), transcript variant 1, mRNA [NM_032023]
Q9H2S1	KCNN2	A_23_P500353	0.306	Homo sapiens potassium intermediate/small conductance calcium-activated channel, subfamily N, member 2 (KCNN2), transcript variant 1, mRNA [NM_021614]
Q9H2X6	HIPK2	A_23_P169756, A_23_P169766, A_24_P500621	12.9633	Homo sapiens cDNA FLJ23711 fis, clone HEP12371. [AK074291],Homo sapiens homeodomain interacting protein kinase 2 (HIPK2), mRNA [NM_022740]
Q9H2X8	IFI27L2	A_23_P140146	2.153	Homo sapiens family with sequence similarity 14, member A (FAM14A), mRNA [NM_032036]
Q9H3H1	TRIT1	A_23_P12062	0.464	Homo sapiens tRNA isopentenyltransferase 1 (TRIT1), mRNA [NM_017646]
Q9H3M7	TXNIP	A_23_P97700	2.562	Homo sapiens thioredoxin interacting protein (TXNIP), mRNA [NM_006472]
Q9H422	HIPK3	A_24_P364066	2.081	Homo sapiens, clone IMAGE:4799578, mRNA. [BC030112]
Q9H425	C1orf198	A_32_P42574	0.499	Homo sapiens hypothetical protein FLJ14525 (FLJ14525), mRNA [NM_032800]
Q9H477	RBKS	A_23_P9523	2.247	Homo sapiens ribokinase (RBKS), mRNA [NM_022128]
Q9H4G4	GLIPR2	A_23_P414913	0.368	Homo sapiens chromosome 9 open reading frame 19 (C9orf19), mRNA [NM_022343]
Q9H4I2	ZHX3	A_24_P57700	0.346	Homo sapiens zinc fingers and homeoboxes 3 (ZHX3), mRNA [NM_015035]
Q9H4W6	EBF3	A_23_P391396	0.0798	Homo sapiens early B-cell factor 3 (EBF3), mRNA [NM_001005463]
Q9H501	ESF1	A_24_P205263, A_24_P404540	0.369	Homo sapiens chromosome 20 open reading frame 6 (C20orf6), mRNA [NM_016649]
Q9H583	HEATR1	A_23_P103628	0.449	Homo sapiens protein BAP28, mRNA (cDNA clone IMAGE:3863792), complete cds. [BC011983]
Q9H5I1	SUV39H2	A_23_P202392	0.376	Homo sapiens suppressor of variegation 3-9 homolog 2 (Drosophila) (SUV39H2), mRNA [NM_024670]
Q9H5Q4	TFB2M	A_23_P45940	0.462	Homo sapiens transcription factor B2, mitochondrial (TFB2M), mRNA [NM_022366]
Q9H5V7	IKZF5	A_23_P35667	0.456	Homo sapiens zinc finger protein, subfamily 1A, 5 (ZNFN1A5), mRNA [NM_022466]
Q9H611	PIF1	A_23_P416468	2.083	Homo sapiens DNA helicase homolog (PIF1) mRNA, partial cds. [AF108138]
Q9H6F5	CCDC86	A_23_P161918, A_24_P38944	0.2945	Homo sapiens hypothetical protein MGC2574 (MGC2574), mRNA [NM_024098]
Q9H6L5	FAM134B	A_23_P167599	5.133	Homo sapiens hypothetical protein FLJ20152 (FLJ20152), mRNA [NM_019000]
Q9H6R0	DHX33	A_24_P364970	0.399	Homo sapiens DEAH (Asp-Glu-Ala-His) box polypeptide 33 (DHX33), mRNA [NM_020162]
Q9H6R4	NOL6	A_24_P21410	0.445	Homo sapiens nucleolar protein family 6 (RNA-associated) (NOL6), transcript variant alpha, mRNA [NM_022917]
Q9H6Y7	RNF167	A_24_P76911	2.012	Homo sapiens ring finger protein 167 (RNF167), mRNA [NM_015528]
Q9H7B2	RPF2	A_23_P19210	0.347	Homo sapiens brix domain containing 1 (BXDC1), mRNA [NM_032194]
Q9H7D0	DOCK5	A_24_P350245	2.037	Homo sapiens dedicator of cytokinesis 5 (DOCK5), mRNA [NM_024940]
Q9H7E9	C8orf33	A_23_P33119, A_24_P170887	0.4315	Homo sapiens chromosome 8 open reading frame 33 (C8orf33), mRNA [NM_023080]
Q9H7F0	ATP13A3	A_24_P183094	0.469	Homo sapiens ORF for hypothetical protein. [AJ306929]
Q9H7M9	C10orf54	A_23_P24077	6.492	Homo sapiens chromosome 10 open reading frame 54 (C10orf54), mRNA [NM_022153]
Q9H8H3	METTL7A	A_23_P415021	10.88	Homo sapiens DKFZP586A0522 protein (DKFZP586A0522), mRNA [NM_014033]
Q9H8X9	ZDHHC11	A_23_P256008, A_24_P153456	0.252	Homo sapiens zinc finger, DHHC-type containing 11 (ZDHHC11), mRNA [NM_024786]
Q9H939	PSTPIP2	A_24_P322353	2.031	Homo sapiens proline-serine-threonine phosphatase interacting protein 2 (PSTPIP2), mRNA [NM_024430]
Q9H9B4	SFXN1	A_23_P346337	0.471	Homo sapiens sideroflexin 1 (SFXN1), mRNA [NM_022754]
Q9H9H5	MAP6D1	A_23_P80839	0.231	Homo sapiens hypothetical protein FLJ12748 (FLJ12748), mRNA [NM_024871]
Q9H9P8	L2HGDH	A_23_P106158	0.46	Homo sapiens L-2-hydroxyglutarate dehydrogenase (L2HGDH), mRNA [NM_024884]
Q9H9V4	RNF122	A_23_P134744	7.01	Homo sapiens ring finger protein 122 (RNF122), mRNA [NM_024787]
Q9H9V9	JMJD4	A_23_P115523	0.431	Homo sapiens jumonji domain containing 4 (JMJD4), mRNA [NM_023007]
Q9H9Y6	POLR1B	A_23_P209987	0.345	Homo sapiens polymerase (RNA) I polypeptide B, 128kDa (POLR1B), mRNA [NM_019014]
Q9HA72	CALHM2	A_23_P202219	9.172	Homo sapiens family with sequence similarity 26, member B (FAM26B), mRNA [NM_015916]
Q9HAQ2	KIF9	A_23_P212307	0.41	Homo sapiens kinesin family member 9 (KIF9), transcript variant 3, mRNA [NM_182903]
Q9HAU8	RNPEPL1	A_23_P17030	2.05	Homo sapiens arginyl aminopeptidase (aminopeptidase B)-like 1 (RNPEPL1), mRNA [NM_018226]
Q9HAV0	GNB4	A_23_P18186, A_32_P184916	0.3905	Homo sapiens guanine nucleotide binding protein (G protein), beta polypeptide 4 (GNB4), mRNA [NM_021629]
Q9HAV4	XPO5	A_23_P256855	0.495	Homo sapiens exportin 5 (XPO5), mRNA [NM_020750]
Q9HAV7	GRPEL1	A_24_P174563	0.371	Homo sapiens GrpE-like 1, mitochondrial (E. coli) (GRPEL1), mRNA [NM_025196]
Q9HB40	SCPEP1	A_23_P152548	4.662	Homo sapiens serine carboxypeptidase 1 (SCPEP1), mRNA [NM_021626]
Q9HBF5	ST20	A_23_P321703	6.125	Homo sapiens cervical cancer suppressor 1
Q9HBI0	PARVG	A_24_P918762	0.411	ALU1_HUMAN (P39188) Alu subfamily J sequence contamination warning entry, partial (5%) [THC2436839]
Q9HC21	SLC25A19	A_23_P55045	0.444	Homo sapiens solute carrier family 25 (mitochondrial deoxynucleotide carrier), member 19 (SLC25A19), mRNA [NM_021734]
Q9HC77	CENPJ	A_24_P298996	0.485	Homo sapiens centromere protein J (CENPJ), mRNA [NM_018451]
Q9HC97	GPR35	A_23_P154245	3.456	Homo sapiens G protein-coupled receptor 35 (GPR35), mRNA [NM_005301]
Q9HCJ3	RAVER2	A_23_P328323	0.488	Homo sapiens hypothetical protein FLJ10770 (KIAA1579), mRNA [NM_018211]
Q9HCK5	AGO4	A_24_P79631	3.443	full-length cDNA clone CS0DF014YO17 of Fetal brain of Homo sapiens (human). [CR598503]
Q9HCM1	KIAA1551	A_23_P98930	2.17	Homo sapiens hypothetical protein FLJ10652 (FLJ10652), mRNA [NM_018169]
Q9HCU8	POLD4	A_23_P127367, A_23_P360215	2.945	Homo sapiens polymerase (DNA-directed), delta 4 (POLD4), mRNA [NM_021173]
Q9HD89	RETN	A_23_P119222	16.9	Homo sapiens resistin (RETN), mRNA [NM_020415]
Q9NNZ3	DNAJC4	A_23_P202769	2.581	Homo sapiens DnaJ (Hsp40) homolog, subfamily C, member 4 (DNAJC4), mRNA [NM_005528]
Q9NPF7	IL23A	A_23_P76078	2.979	Homo sapiens interleukin 23, alpha subunit p19 (IL23A), mRNA [NM_016584]
Q9NPH3	IL1RAP	A_23_P170857	3.745	Homo sapiens interleukin 1 receptor accessory protein (IL1RAP), transcript variant 1, mRNA [NM_002182]
Q9NPI7	KRCC1	A_23_P56759	7.619	Homo sapiens hypothetical protein LOC51315 (LOC51315), mRNA [NM_016618]
Q9NPP4	NLRC4	A_23_P119835	19.11	Homo sapiens caspase recruitment domain family, member 12 (CARD12), mRNA [NM_021209]
Q9NQ48	LZTFL1	A_23_P41049, A_24_P37519	0.4715	Homo sapiens leucine zipper transcription factor-like 1 (LZTFL1), mRNA [NM_020347]
Q9NQ84	GPRC5C	A_23_P38167	9.66	Homo sapiens G protein-coupled receptor, family C, group 5, member C (GPRC5C), transcript variant 1, mRNA [NM_022036]
Q9NQ86	TRIM36	A_23_P110569	2.192	Homo sapiens tripartite motif-containing 36 (TRIM36), transcript variant 1, mRNA [NM_018700]
Q9NQ92	COPRS	A_23_P152858, A_24_P130296	0.458	Homo sapiens hypothetical protein, clone 2746033 (HSA272196), mRNA [NM_018405]
Q9NQW1	SEC31B	A_23_P35564	2.524	Homo sapiens SEC31-like 2 (S. cerevisiae) (SEC31L2), transcript variant 1, mRNA [NM_015490]
Q9NR30	DDX21	A_24_P146603, A_24_P415260	0.3225	Homo sapiens DEAD (Asp-Glu-Ala-Asp) box polypeptide 21 (DDX21), mRNA [NM_004728],Homo sapiens cDNA FLJ36123 fis, clone TESTI2022874, weakly similar to ZINC FINGER PROTEIN 135. [AK093442]
Q9NR34	MAN1C1	A_23_P103601	4.318	Homo sapiens mannosidase, alpha, class 1C, member 1 (MAN1C1), mRNA [NM_020379]
Q9NR50	EIF2B3	A_23_P115046	0.26	Homo sapiens eukaryotic translation initiation factor 2B, subunit 3 gamma, 58kDa (EIF2B3), mRNA [NM_020365]
Q9NR96	TLR9	A_23_P132654	0.232	Homo sapiens toll-like receptor 9 (TLR9), transcript variant A, mRNA [NM_017442]
Q9NRB3	CHST12	A_23_P310421	0.447	Homo sapiens carbohydrate (chondroitin 4) sulfotransferase 12 (CHST12), mRNA [NM_018641]
Q9NRG0	CHRAC1	A_23_P123544	0.447	Homo sapiens chromatin accessibility complex 1 (CHRAC1), mRNA [NM_017444]
Q9NRG4	SMYD2	A_23_P170587	0.38	Homo sapiens SET and MYND domain containing 2 (SMYD2), mRNA [NM_020197]
Q9NRK6	ABCB10	A_23_P201918, A_24_P274073, A_32_P23624	0.109033	Homo sapiens ATP-binding cassette, sub-family B (MDR/TAP), member 10 (ABCB10), nuclear gene encoding mitochondrial protein, mRNA [NM_012089]
Q9NRQ5	SMCO4	A_23_P75430	2.032	Homo sapiens FN5 protein (FN5), mRNA [NM_020179]
Q9NRR8	CDC42SE1	A_23_P320883	3.265	Homo sapiens CDC42 small effector 1 (CDC42SE1), mRNA [NM_020239]
Q9NRW1	RAB6B	A_32_P151191	0.454	AI341335 qx90h06.x1 NCI_CGAP_GC6 Homo sapiens cDNA clone IMAGE:2009819 3', mRNA sequence [AI341335]
Q9NRW4	DUSP22	A_23_P120254	4.096	Homo sapiens dual specificity phosphatase 22 (DUSP22), mRNA [NM_020185]
Q9NRX1	PNO1	A_23_P102183, A_24_P336853	0.305	Homo sapiens (clone p5-23-3) mRNA. [L48692],Homo sapiens putatative 28 kDa protein (LOC56902), mRNA [NM_020143]
Q9NS18	GLRX2	A_23_P160503	0.456	Homo sapiens glutaredoxin 2 (GLRX2), transcript variant 1, mRNA [NM_016066]
Q9NS23	RASSF1	A_23_P41066	2.035	Homo sapiens Ras association (RalGDS/AF-6) domain family 1 (RASSF1), transcript variant G, mRNA [NM_170717]
Q9NS86	LANCL2	A_23_P82642	0.5	Homo sapiens LanC lantibiotic synthetase component C-like 2 (bacterial) (LANCL2), mRNA [NM_018697]
Q9NS91	RAD18	A_23_P121222	0.476	Homo sapiens RAD18 homolog (S. cerevisiae) (RAD18), mRNA [NM_020165]
Q9NSA3	CTNNBIP1	A_23_P23584	2.016	Homo sapiens catenin, beta interacting protein 1 (CTNNBIP1), transcript variant 1, mRNA [NM_020248]
Q9NSC5	HOMER3	A_23_P39364	6.412	Homo sapiens homer homolog 3 (Drosophila) (HOMER3), mRNA [NM_004838]
Q9NSD9	FARSB	A_23_P165346, A_23_P165355	0.3955	Homo sapiens phenylalanine-tRNA synthetase-like, beta subunit (FARSLB), mRNA [NM_005687]
Q9NTM9	CUTC	A_23_P98015	0.435	Homo sapiens cutC copper transporter homolog (E.coli) (CUTC), mRNA [NM_015960]
Q9NTX7	RNF146	A_23_P257201	2.436	Homo sapiens ring finger protein 146 (RNF146), mRNA [NM_030963]
Q9NU22	MDN1	A_23_P365060	0.41	Homo sapiens MDN1, midasin homolog (yeast) (MDN1), mRNA [NM_014611]
Q9NUL5	C19orf66	A_23_P38894	3.702	Homo sapiens hypothetical protein FLJ11286 (FLJ11286), mRNA [NM_018381]
Q9NUQ2	AGPAT5	A_23_P216200	0.48	Homo sapiens 1-acylglycerol-3-phosphate O-acyltransferase 5 (lysophosphatidic acid acyltransferase, epsilon) (AGPAT5), mRNA [NM_018361]
Q9NUQ3	TXLNG	A_23_P146997	0.263	Homo sapiens chromosome X open reading frame 15 (CXorf15), mRNA [NM_018360]
Q9NUU6	FAM105A	A_23_P133438	3.029	Homo sapiens hypothetical protein FLJ11127 (FLJ11127), mRNA [NM_019018]
Q9NUU7	DDX19A	A_23_P129606	0.416	Homo sapiens DDX19-DDX19L protein (DDX19-DDX19L), mRNA [NM_001015047]
Q9NV06	DCAF13	A_23_P215875	0.48	Homo sapiens WD repeats and SOF1 domain containing (WDSOF1), mRNA [NM_015420]
Q9NV92	NDFIP2	A_23_P363472, A_24_P264909	0.4185	Homo sapiens Nedd4 family interacting protein 2 (NDFIP2), mRNA [NM_019080],Homo sapiens mRNA for KIAA1165 protein, partial cds. [AB032991]
Q9NVA2	2017-09-11	A_23_P306964	0.46	Homo sapiens septin 11 (SEPT11), mRNA [NM_018243]
Q9NVH1	DNAJC11	A_24_P413735	0.43	Homo sapiens DnaJ (Hsp40) homolog, subfamily C, member 11 (DNAJC11), mRNA [NM_018198]
Q9NVI7	ATAD3A	A_23_P201357	0.391	Homo sapiens ATPase family, AAA domain containing 3A (ATAD3A), mRNA [NM_018188]
Q9NVM9	ASUN	A_23_P36464	0.415	Homo sapiens chromosome 12 open reading frame 11 (C12orf11), mRNA [NM_018164]
Q9NVP1	DDX18	A_23_P56865, A_24_P165736	0.4305	Homo sapiens DEAD (Asp-Glu-Ala-Asp) box polypeptide 18 (DDX18), mRNA [NM_006773]
Q9NVR5	DNAAF2	A_23_P14493	0.472	Homo sapiens chromosome 14 open reading frame 104 (C14orf104), mRNA [NM_018139]
Q9NVU7	SDAD1	A_24_P397247	0.383	Homo sapiens SDA1 domain containing 1 (SDAD1), mRNA [NM_018115]
Q9NVX2	NLE1	A_23_P141315	0.418	Homo sapiens notchless homolog 1 (Drosophila) (NLE1), transcript variant 2, mRNA [NM_001014445]
Q9NW08	POLR3B	A_23_P87732	0.361	Homo sapiens polymerase (RNA) III (DNA directed) polypeptide B (POLR3B), mRNA [NM_018082]
Q9NWB7	IFT57	A_23_P121386	0.337	Homo sapiens estrogen-related receptor beta like 1 (ESRRBL1), mRNA [NM_018010]
Q9NWM0	SMOX	A_23_P102731	4.472	Homo sapiens spermine oxidase (SMOX), transcript variant 1, mRNA [NM_175839]
Q9NWQ8	PAG1	A_23_P347070	2.907	Homo sapiens phosphoprotein associated with glycosphingolipid microdomains 1 (PAG1), mRNA [NM_018440]
Q9NWS6	FAM118A	A_23_P120973	0.427	Homo sapiens chromosome 22 open reading frame 8 (C22orf8), mRNA [NM_017911]
Q9NWT1	PAK1IP1	A_23_P122674	0.453	Homo sapiens PAK1 interacting protein 1 (PAK1IP1), mRNA [NM_017906]
Q9NX57	RAB20	A_24_P22050	4.544	Homo sapiens RAB20, member RAS oncogene family (RAB20), mRNA [NM_017817]
Q9NX58	LYAR	A_23_P41327	0.334	Homo sapiens hypothetical protein FLJ20425 (LYAR), mRNA [NM_017816]
Q9NX94	WBP1L	A_24_P64362	2.138	Homo sapiens cDNA FLJ20154 fis, clone COL08740. [AK000161]
Q9NXC2	GFOD1	A_23_P122662	2.515	Homo sapiens glucose-fructose oxidoreductase domain containing 1 (GFOD1), mRNA [NM_018988]
Q9NXF7	DCAF16	A_23_P144438	0.415	Homo sapiens hypothetical protein FLJ20280 (FLJ20280), mRNA [NM_017741]
Q9NXH8	TOR4A	A_23_P147106	2.344	Homo sapiens hypothetical protein FLJ20245 (FLJ20245), mRNA [NM_017723]
Q9NXJ5	PGPEP1	A_23_P327370	2.845	Homo sapiens hypothetical protein MGC10812, mRNA (cDNA clone MGC:10812 IMAGE:3612949), complete cds. [BC004942]
Q9NXR5	ANKRD10	A_23_P205046	2.499	Homo sapiens ankyrin repeat domain 10 (ANKRD10), mRNA [NM_017664]
Q9NXV2	KCTD5	A_32_P191084	2.306	Homo sapiens potassium channel tetramerisation domain containing 5 (KCTD5), mRNA [NM_018992]
Q9NXW2	DNAJB12	A_24_P244096, A_24_P244100	3.6965	Homo sapiens DnaJ (Hsp40) homolog, subfamily B, member 12 (DNAJB12), transcript variant 1, mRNA [NM_001002762]
Q9NY12	GAR1	A_23_P58280	0.399	Homo sapiens nucleolar protein family A, member 1 (H/ACA small nucleolar RNPs) (NOLA1), transcript variant 1, mRNA [NM_018983]
Q9NY59	SMPD3	A_23_P163567	3.725	Homo sapiens sphingomyelin phosphodiesterase 3, neutral membrane (neutral sphingomyelinase II) (SMPD3), mRNA [NM_018667]
Q9NY64	SLC2A8	A_23_P252783, A_24_P175435, A_24_P64182	0.339	Homo sapiens solute carrier family 2, (facilitated glucose transporter) member 8 (SLC2A8), mRNA [NM_014580]
Q9NY65	TUBA8	A_24_P160104	2.281	Homo sapiens tubulin, alpha 8 (TUBA8), mRNA [NM_018943]
Q9NYF8	BCLAF1	A_23_P111343	0.494	Homo sapiens BCL2-associated transcription factor 1 (BCLAF1), mRNA [NM_014739]
Q9NYK5	MRPL39	A_23_P143446	0.48	Homo sapiens mitochondrial ribosomal protein L39 (MRPL39), nuclear gene encoding mitochondrial protein, transcript variant 1, mRNA [NM_017446]
Q9NYL2	AC013461.1	A_23_P366394	0.288	Homo sapiens sterile alpha motif and leucine zipper containing kinase AZK (ZAK), transcript variant 1, mRNA [NM_016653]
Q9NYZ2	SLC25A37	A_24_P201089	0.429	Homo sapiens solute carrier family 25, member 37 (SLC25A37), transcript variant 1, mRNA [NM_016612]
Q9NZF1	PLAC8	A_23_P81219	0.302	Homo sapiens placenta-specific 8 (PLAC8), mRNA [NM_016619]
Q9NZJ4	SACS	A_23_P128663	0.367	Homo sapiens spastic ataxia of Charlevoix-Saguenay (sacsin) (SACS), mRNA [NM_014363]
Q9NZJ6	COQ3	A_23_P111228	0.364	Homo sapiens coenzyme Q3 homolog, methyltransferase (yeast) (COQ3), mRNA [NM_017421]
Q9NZV6	MSRB1	A_23_P129486, A_23_P129492	2.26	Homo sapiens selenoprotein X, 1 (SEPX1), mRNA [NM_016332]
Q9NZW5	MPP6	A_23_P71053, A_32_P137336	0.138	Homo sapiens membrane protein, palmitoylated 6 (MAGUK p55 subfamily member 6) (MPP6), mRNA [NM_016447],Homo sapiens, clone IMAGE:3459334, mRNA. [BC013077]
Q9P031	CCDC59	A_32_P120084	0.499	Homo sapiens HSPC128 protein (HSPC128), mRNA [NM_014167]
Q9P032	NDUFAF4	A_24_P171983	0.384	Homo sapiens chromosome 6 open reading frame 66 (C6orf66), mRNA [NM_014165]
Q9P0S9	TMEM14C	A_23_P111288	2.069	Homo sapiens transmembrane protein 14C (TMEM14C), mRNA [NM_016462]
Q9P227	ARHGAP23	A_24_P920207	0.174	Q69ZH9 (Q69ZH9) MKIAA1501 protein (Fragment), partial (98%) [THC2363099]
Q9P278	FNIP2	A_23_P400580	2.382	Homo sapiens mRNA for KIAA1450 protein, partial cds. [AB040883]
Q9P287	BCCIP	A_24_P30206	0.487	Homo sapiens BRCA2 and CDKN1A interacting protein (BCCIP), transcript variant B, mRNA [NM_078468]
Q9P2A4	ABI3	A_23_P141429	5.668	Homo sapiens ABI gene family, member 3 (ABI3), mRNA [NM_016428]
Q9P2B7	CFAP97	A_23_P318581	0.418	Homo sapiens mRNA for KIAA1430 protein, partial cds. [AB037851]
Q9P2F9	ZNF319	A_23_P26314	3.186	Homo sapiens zinc finger protein 319 (ZNF319), mRNA [NM_020807]
Q9P2H5	USP35	A_23_P116602	2.308	Homo sapiens mRNA for KIAA1372 protein, partial cds. [AB037793]
Q9P2J5	LARS	A_23_P218965, A_24_P51360	0.406	Homo sapiens leucyl-tRNA synthetase (LARS), mRNA [NM_020117]
Q9P2J9	PDP2	A_23_P66063	0.338	Homo sapiens pyruvate dehydrogenase phosphatase isoenzyme 2 (PDP2), mRNA [NM_020786]
Q9P2W6	C11orf21	A_23_P98671	0.218	Homo sapiens C11orf21 mRNA, complete cds. [AB029488]
Q9P2X3	IMPACT	A_23_P208070	0.407	Homo sapiens hypothetical protein IMPACT (IMPACT), mRNA [NM_018439]
Q9UBR2	CTSZ	A_23_P40240	10.36	Homo sapiens cathepsin Z (CTSZ), mRNA [NM_001336]
Q9UBT7	CTNNAL1	A_23_P157795	0.484	Homo sapiens catenin (cadherin-associated protein), alpha-like 1 (CTNNAL1), mRNA [NM_003798]
Q9UBU3	GHRL	A_23_P40956	15.38	Homo sapiens ghrelin precursor (GHRL), mRNA [NM_016362]
Q9UDT6	CLIP2	A_23_P215479	3.153	Homo sapiens cytoplasmic linker 2 (CYLN2), transcript variant 1, mRNA [NM_003388]
Q9UDX5	MTFP1	A_23_P29204	0.441	Homo sapiens mitochondrial protein 18 kDa (MTP18), nuclear gene encoding mitochondrial protein, transcript variant 1, mRNA [NM_016498]
Q9UEE5	STK17A	A_24_P337796	2.288	Homo sapiens serine/threonine kinase 17a (apoptosis-inducing) (STK17A), mRNA [NM_004760]
Q9UEW8	STK39	A_23_P90762, A_24_P19544	0.443	Homo sapiens serine threonine kinase 39 (STE20/SPS1 homolog, yeast) (STK39), mRNA [NM_013233]
Q9UEY8	ADD3	A_23_P202435	4.169	Homo sapiens adducin 3 (gamma) (ADD3), transcript variant 1, mRNA [NM_016824]
Q9UG22	GIMAP2	A_23_P368681	2.351	Homo sapiens GTPase, IMAP family member 2 (GIMAP2), mRNA [NM_015660]
Q9UG63	ABCF2	A_24_P380629	0.394	Homo sapiens ATP-binding cassette, sub-family F (GCN20), member 2 (ABCF2), nuclear gene encoding mitochondrial protein, transcript variant 1, mRNA [NM_007189]
Q9UGN4	CD300A	A_23_P207037, A_24_P159434	15.5595	Homo sapiens CD300A antigen (CD300A), mRNA [NM_007261]
Q9UGP8	SEC63	A_24_P192183, A_24_P402064	0.4835	Homo sapiens SEC63-like (S. cerevisiae) (SEC63), mRNA [NM_007214]
Q9UH36	SRRD	A_24_P288954, A_32_P135385	0.464	Homo sapiens similar to SRR1-like protein (LOC402055), mRNA [NM_001013694]
Q9UH99	SUN2	A_32_P194115	2.79	Homo sapiens unc-84 homolog B (C. elegans) (UNC84B), mRNA [NM_015374]
Q9UHD1	CHORDC1	A_23_P138805	0.445	Homo sapiens cysteine and histidine-rich domain (CHORD)-containing, zinc binding protein 1 (CHORDC1), mRNA [NM_012124]
Q9UHP7	CLEC2D	A_23_P204689	2.851	Homo sapiens C-type lectin superfamily 2, member D (CLEC2D), transcript variant 2, mRNA [NM_001004419]
Q9UHV2	SERTAD1	A_23_P218463	4.327	Homo sapiens SERTA domain containing 1 (SERTAD1), mRNA [NM_013376]
Q9UHW5	GPN3	A_23_P116999	0.416	Homo sapiens protein x 0004 (MGC14560), mRNA [NM_016301]
Q9UHX3	ADGRE2	A_23_P502336	2.303	Homo sapiens egf-like module containing, mucin-like, hormone receptor-like 2 (EMR2), transcript variant 1, mRNA [NM_013447]
Q9UIA0	CYTH4	A_23_P155057	4.615	Homo sapiens pleckstrin homology, Sec7 and coiled-coil domains 4 (PSCD4), mRNA [NM_013385]
Q9UIB8	CD84	A_23_P361940	0.47	Homo sapiens CD84 antigen (leukocyte antigen) (CD84), mRNA [NM_003874]
Q9UII4	HERC5	A_23_P110196	0.419	Homo sapiens hect domain and RLD 5 (HERC5), mRNA [NM_016323]
Q9UIJ5	ZDHHC2	A_23_P9086, A_24_P286687	0.474	Homo sapiens zinc finger, DHHC-type containing 2 (ZDHHC2), mRNA [NM_016353]
Q9UJ68	MSRA	A_23_P61426	2.037	Homo sapiens methionine sulfoxide reductase A (MSRA), mRNA [NM_012331]
Q9UJA2	CRLS1	A_23_P400435	0.464	Homo sapiens chromosome 20 open reading frame 155 (C20orf155), mRNA [NM_019095]
Q9UJA5	TRMT6	A_23_P102743	0.416	Homo sapiens CGI-09 protein (CGI-09), mRNA [NM_015939]
Q9UJY1	HSPB8	A_23_P123256	0.493	Homo sapiens PDGFA associated protein 1 (PDAP1), mRNA [NM_014891]
Q9UKA1	FBXL5	A_23_P213247	2.137	Homo sapiens F-box and leucine-rich repeat protein 5 (FBXL5), transcript variant 2, mRNA [NM_033535]
Q9UKB3	DNAJC12	A_23_P127220	0.301	Homo sapiens DnaJ (Hsp40) homolog, subfamily C, member 12 (DNAJC12), transcript variant 1, mRNA [NM_021800]
Q9UKD2	MRTO4	A_23_P35099	0.339	Homo sapiens chromosome 1 open reading frame 33 (C1orf33), mRNA [NM_016183]
Q9UKF7	PITPNC1	A_23_P66473	2.422	Homo sapiens phosphatidylinositol transfer protein, cytoplasmic 1 (PITPNC1), transcript variant 2, mRNA [NM_181671]
Q9UKG1	APPL1	A_24_P302833	0.393	Homo sapiens adaptor protein containing pH domain, PTB domain and leucine zipper motif 1 (APPL), mRNA [NM_012096]
Q9UKL6	PCTP	A_23_P4041	3.698	Homo sapiens phosphatidylcholine transfer protein (PCTP), mRNA [NM_021213]
Q9UKN8	GTF3C4	A_23_P20732	0.434	Homo sapiens general transcription factor IIIC, polypeptide 4, 90kDa (GTF3C4), mRNA [NM_012204]
Q9UKS7	IKZF2	A_32_P114284, A_32_P127978	0.1615	NQRB_CHLMU (Q9PKB6) Probable Na(+)-translocating NADH-quinone reductase subunit B (Na(+)-translocating NQR subunit B) (Na(+)-NQR subunit B) (NQR complex subunit B) (NQR-1 subunit B) , partial (4%) [THC2338091]
Q9UL01	DSE	A_23_P19226	6.221	Homo sapiens squamous cell carcinoma antigen recognized by T cells 2 (SART2), mRNA [NM_013352]
Q9UL18	AGO1	A_23_P11764	3.119	Homo sapiens eukaryotic translation initiation factor 2C, 1 (EIF2C1), mRNA [NM_012199]
Q9UL19	RARRES3	A_23_P1962	4.749	Homo sapiens retinoic acid receptor responder (tazarotene induced) 3 (RARRES3), mRNA [NM_004585]
Q9ULE0	WWC3	A_23_P345650	2.646	Homo sapiens KIAA1280 protein (KIAA1280), mRNA [NM_015691]
Q9ULF5	SLC39A10	A_23_P119778	0.421	Homo sapiens solute carrier family 39 (zinc transporter), member 10 (SLC39A10), mRNA [NM_020342]
Q9ULP9	TBC1D24	A_32_P458096	0.442	Homo sapiens mRNA; cDNA DKFZp686J0866 (from clone DKFZp686J0866). [BX648283]
Q9ULQ1	TPCN1	A_23_P218086	2.048	Homo sapiens mRNA for KIAA1169 protein, partial cds. [AB032995]
Q9ULZ3	PYCARD	A_23_P26629	2.002	Homo sapiens PYD and CARD domain containing (PYCARD), transcript variant 1, mRNA [NM_013258]
Q9UM22	EPDR1	A_24_P166613	0.21	Homo sapiens ependymin related protein 1 (zebrafish) (EPDR1), mRNA [NM_017549]
Q9UMY1	NOL7	A_23_P82068	0.406	Homo sapiens nucleolar protein 7, 27kDa (NOL7), mRNA [NM_016167]
Q9UN19	DAPP1	A_23_P255444	8.39	Homo sapiens dual adaptor of phosphotyrosine and 3-phosphoinositides (DAPP1), mRNA [NM_014395]
Q9UNN8	PROCR	A_23_P80040	6.513	Homo sapiens protein C receptor, endothelial (EPCR) (PROCR), mRNA [NM_006404]
Q9UNQ2	DIMT1	A_23_P58529, A_24_P266035	0.3805	Homo sapiens dimethyladenosine transferase (HSA9761), mRNA [NM_014473]
Q9UNW8	GPR132	A_23_P128808	2.022	Homo sapiens G protein-coupled receptor 132 (GPR132), mRNA [NM_013345]
Q9UNX3	RPL26L1	A_32_P205553	0.499	Homo sapiens ribosomal protein L26-like 1 (RPL26L1), mRNA [NM_016093]
Q9UNX4	WDR3	A_23_P23318, A_24_P122524	0.345	Homo sapiens WD repeat domain 3 (WDR3), mRNA [NM_006784]
Q9UPM9	B9D1	A_24_P176714	0.315	Homo sapiens B9 protein (EPPB9), mRNA [NM_015681]
Q9UPP2	IQSEC3	A_32_P141013	3.445	Homo sapiens mRNA for KIAA1110 protein, partial cds. [AB029033]
Q9UPY5	SLC7A11	A_32_P165477	2.94	Homo sapiens solute carrier family 7, (cationic amino acid transporter, y+ system) member 11, mRNA (cDNA clone IMAGE:5300264), partial cds. [BC041925]
Q9UQ80	PA2G4	A_23_P116679, A_24_P221123, A_24_P827491	0.338333	Homo sapiens proliferation-associated 2G4, 38kDa (PA2G4), mRNA [NM_006191]
Q9UQC2	GAB2	A_23_P203743	4.086	Homo sapiens GRB2-associated binding protein 2 (GAB2), transcript variant 2, mRNA [NM_012296]
Q9UQQ2	SH2B3	A_24_P201739	2.303	Homo sapiens lymphocyte adaptor protein (LNK), mRNA [NM_005475]
Q9Y221	NIP7	A_23_P54834	0.352	Homo sapiens comparative gene identification transcript 37 (CGI-37), mRNA [NM_016101]
Q9Y228	TRAF3IP3	A_23_P323761, A_23_P334414	2.8665	Homo sapiens TRAF3 interacting protein 3 (TRAF3IP3), mRNA [NM_025228]
Q9Y230	RUVBL2	A_23_P39110	0.393	Homo sapiens RuvB-like 2 (E. coli) (RUVBL2), mRNA [NM_006666]
Q9Y240	CLEC11A	A_23_P153489	2.458	Homo sapiens C-type lectin domain family 11, member A (CLEC11A), mRNA [NM_002975]
Q9Y265	RUVBL1	A_24_P148811	0.26	Homo sapiens RuvB-like 1 (E. coli) (RUVBL1), mRNA [NM_003707]
Q9Y266	NUDC	A_23_P74653	0.494	Homo sapiens nuclear distribution gene C homolog (A. nidulans) (NUDC), mRNA [NM_006600]
Q9Y271	CYSLTR1	A_23_P22660	3.294	Homo sapiens cysteinyl leukotriene receptor 1 (CYSLTR1), mRNA [NM_006639]
Q9Y274	ST3GAL6	A_23_P250800	2.882	Homo sapiens ST3 beta-galactoside alpha-2,3-sialyltransferase 6 (ST3GAL6), mRNA [NM_006100]
Q9Y287	ITM2B	A_24_P381604	5.706	Homo sapiens integral membrane protein 2B (ITM2B), mRNA [NM_021999]
Q9Y289	SLC5A6	A_23_P102508, A_23_P383060	0.454	Homo sapiens solute carrier family 5 (sodium-dependent vitamin transporter), member 6 (SLC5A6), mRNA [NM_021095]
Q9Y2D1	ATF5	A_23_P119337	0.225	Homo sapiens activating transcription factor 5 (ATF5), mRNA [NM_012068]
Q9Y2D9	ZNF652	A_23_P55256	2.016	Homo sapiens zinc finger protein 652 (ZNF652), mRNA [NM_014897]
Q9Y2H1	STK38L	A_23_P64743, A_24_P99046	3.022	Homo sapiens serine/threonine kinase 38 like (STK38L), mRNA [NM_015000]
Q9Y2I8	WDR37	A_23_P47073	2.343	Homo sapiens WD repeat domain 37 (WDR37), mRNA [NM_014023]
Q9Y2L1	DIS3	A_24_P219024	0.488	Homo sapiens KIAA1008 (KIAA1008), mRNA [NM_014953]
Q9Y2P5	SLC27A5	A_23_P4611	0.469	Homo sapiens solute carrier family 27 (fatty acid transporter), member 5 (SLC27A5), mRNA [NM_012254]
Q9Y2R2	PTPN22	A_23_P149345	2.166	Homo sapiens protein tyrosine phosphatase, non-receptor type 22 (lymphoid) (PTPN22), transcript variant 1, mRNA [NM_015967]
Q9Y2R5	MRPS17	A_23_P258321	0.446	Homo sapiens mitochondrial ribosomal protein S17 (MRPS17), nuclear gene encoding mitochondrial protein, mRNA [NM_015969]
Q9Y2S2	CRYL1	A_23_P162746	2.149	Homo sapiens crystallin, lambda 1 (CRYL1), mRNA [NM_015974]
Q9Y2X3	NOP58	A_23_P154447	0.448	Homo sapiens nucleolar protein NOP5/NOP58 (NOP5/NOP58), mRNA [NM_015934]
Q9Y397	ZDHHC9	A_23_P148057	0.37	Homo sapiens zinc finger, DHHC-type containing 9 (ZDHHC9), transcript variant 1, mRNA [NM_016032]
Q9Y3B8	REXO2	A_23_P150365, A_24_P316364	0.3465	Homo sapiens small fragment nuclease (DKFZP566E144), mRNA [NM_015523]
Q9Y3B9	RRP15	A_23_P23356	0.375	Homo sapiens CGI-115 protein (CGI-115), mRNA [NM_016052]
Q9Y3C1	NOP16	A_23_P144726	0.353	Homo sapiens hypothetical protein HSPC111 (HSPC111), mRNA [NM_016391]
Q9Y3D2	MSRB2	A_23_P97932	2.209	Homo sapiens methionine sulfoxide reductase B2 (MSRB2), mRNA [NM_012228]
Q9Y3D8	AK6	A_23_P21734	0.417	Homo sapiens TAF9 RNA polymerase II, TATA box binding protein (TBP)-associated factor, 32kDa (TAF9), transcript variant 3, mRNA [NM_001015891]
Q9Y4A8	NFE2L3	A_23_P42718	0.182	Homo sapiens nuclear factor (erythroid-derived 2)-like 3 (NFE2L3), mRNA [NM_004289]
Q9Y4D7	PLXND1	A_24_P376391	0.462	Homo sapiens plexin D1 (PLXND1), mRNA [NM_015103]
Q9Y4H4	GPSM3	A_23_P219060	3.543	Homo sapiens G-protein signalling modulator 3 (AGS3-like, C. elegans) (GPSM3), mRNA [NM_022107]
Q9Y4K1	AIM1	A_23_P70785	2.281	Homo sapiens absent in melanoma 1 (AIM1), mRNA [NM_001624]
Q9Y4U1	MMACHC	A_24_P83586	0.431	Homo sapiens DKFZp564I122 protein (DKFZp564I122), mRNA [NM_015506]
Q9Y4W2	LAS1L	A_23_P256021	0.447	Homo sapiens LAS1-like (S. cerevisiae) (LAS1L), mRNA [NM_031206]
Q9Y519	TMEM184B	A_23_P17870	3.083	Homo sapiens chromosome 22 open reading frame 5 (C22orf5), mRNA [NM_012264]
Q9Y535	POLR3H	A_32_P201496	0.431	Homo sapiens polymerase (RNA) III (DNA directed) polypeptide H (22.9kD) (POLR3H), transcript variant 2, mRNA [NM_001018052]
Q9Y592	CEP83	A_23_P162378	0.322	Homo sapiens NY-REN-58 antigen (NY-REN-58), mRNA [NM_016122]
Q9Y5B9	SUPT16H	A_24_P153800	0.351	Homo sapiens suppressor of Ty 16 homolog (S. cerevisiae) (SUPT16H), mRNA [NM_007192]
Q9Y5K5	UCHL5	A_23_P148798, A_24_P188325	0.399	Homo sapiens ubiquitin carboxyl-terminal hydrolase L5 (UCHL5), mRNA [NM_015984]
Q9Y5L4	TIMM13	A_23_P56316	0.367	Homo sapiens translocase of inner mitochondrial membrane 13 homolog (yeast) (TIMM13), nuclear gene encoding mitochondrial protein, mRNA [NM_012458]
Q9Y5P6	GMPPB	A_23_P92202	0.49	Homo sapiens GDP-mannose pyrophosphorylase B (GMPPB), transcript variant 2, mRNA [NM_021971]
Q9Y5W9	SNX11	A_23_P89343	2.009	Homo sapiens sorting nexin 11 (SNX11), transcript variant 1, mRNA [NM_152244]
Q9Y5Z9	UBIAD1	A_23_P103476	0.439	Homo sapiens UbiA prenyltransferase domain containing 1 (UBIAD1), mRNA [NM_013319]
Q9Y606	PUS1	A_23_P251771, A_24_P335358	0.3505	Homo sapiens pseudouridylate synthase 1 (PUS1), transcript variant 1, mRNA [NM_025215]
Q9Y617	PSAT1	A_23_P259692	0.16	Homo sapiens phosphoserine aminotransferase 1 (PSAT1), transcript variant 1, mRNA [NM_058179]
Q9Y624	F11R	A_24_P319364	4.206	Homo sapiens F11 receptor (F11R), transcript variant 4, mRNA [NM_144503]
Q9Y6C9	MTCH2	A_23_P64010	0.469	Homo sapiens mitochondrial carrier homolog 2 (C. elegans) (MTCH2), nuclear gene encoding mitochondrial protein, mRNA [NM_014342]
Q9Y6D9	MAD1L1	A_23_P333735	0.344	Homo sapiens MAD1 mitotic arrest deficient-like 1 (yeast) (MAD1L1), transcript variant 1, mRNA [NM_003550]
Q9Y6E2	BZW2	A_23_P157215	0.492	Homo sapiens basic leucine zipper and W2 domains 2 (BZW2), mRNA [NM_014038]
Q9Y6F9	WNT6	A_23_P119916	0.0855	Homo sapiens wingless-type MMTV integration site family, member 6 (WNT6), mRNA [NM_006522]
Q9Y6G3	MRPL42	A_23_P25163, A_24_P352445	0.4375	Homo sapiens mitochondrial ribosomal protein L42 (MRPL42), nuclear gene encoding mitochondrial protein, transcript variant 3, mRNA [NM_172178]
Q9Y6H3	XRCC6BP1	A_23_P53363	0.425	Homo sapiens Ku70-binding protein 3 (KUB3), mRNA [NM_033276]
Q9Y6H6	KCNE3	A_23_P24948	7.838	Homo sapiens potassium voltage-gated channel, Isk-related family, member 3 (KCNE3), mRNA [NM_005472]
Q9Y6H8	GJA3	A_32_P205241	0.26	7l60c12.x1 Soares_NSF_F8_9W_OT_PA_P_S1 Homo sapiens cDNA clone IMAGE:3525886 3', mRNA sequence [BF109232]
Q9Y6I7	WSB1	A_23_P4353	2.13	Homo sapiens WD repeat and SOCS box-containing 1 (WSB1), transcript variant 3, mRNA [NM_134264]
Q9Y6J8	STYXL1	A_23_P111635	2.629	Homo sapiens dual specificity phosphatase 24 (putative) (DUSP24), mRNA [NM_016086]
Q9Y6M0	PRSS21	A_23_P129602	0.216	Homo sapiens protease, serine, 21 (testisin) (PRSS21), transcript variant 1, mRNA [NM_006799]
Q9Y6N1	COX11	A_24_P404204	0.494	Homo sapiens COX11 homolog, cytochrome c oxidase assembly protein (yeast) (COX11), nuclear gene encoding mitochondrial protein, mRNA [NM_004375]
Q9Y6X2	PIAS3	A_23_P149678	4.107	Homo sapiens protein inhibitor of activated STAT, 3 (PIAS3), mRNA [NM_006099]

## Sheet: all transcripts detected
Ensembl ID	Gene symbol	Agilent ID	Time 0.0 normalized	Time 0.0 raw	Time 0.0 t-test p-value	Time 3.0 normalized	Time 3.0 raw	Time 3.0 t-test p-value	Time 24.0 normalized	Time 24.0 raw	Time 24.0 t-test p-value	Time 96.0 normalized	Time 96.0 raw	Time 96.0 t-test p-value
ENSG00000000419	DPM1	A_23_P68472	1.014 (0.972 to 1.045)	12821 (7432 to 23593)	0.605	1.064 (0.973 to 1.141)	14616 (6296 to 26995)	0.114	0.859 (0.827 to 0.906)	11264 (7793 to 20232)	0.00188	0.712 (0.664 to 0.786)	11891 (10700 to 13853)	0.000337
ENSG00000000457	SCYL3	A_23_P74320	0.971 (0.911 to 1.046)	392.1 (231.9 to 733.3)	0.34	1.093 (1.041 to 1.15)	441.9 (188.1 to 838.8)	0.022	1.111 (0.986 to 1.213)	457.8 (306.3 to 879)	0.0166	1.092 (0.948 to 1.29)	589.9 (492.3 to 719.4)	0.166
ENSG00000000460	C1orf112	A_23_P11862	1.129 (1.086 to 1.183)	2566 (1601 to 4510)	0.00326	0.936 (0.876 to 1.014)	2149 (1285 to 3316)	0.131	1.17 (1.091 to 1.299)	2751 (2045 to 4795)	0.000609	0.803 (0.71 to 0.97)	2467 (1998 to 2849)	0.0113
ENSG00000000938	FGR	A_23_P103932	0.217 (0.185 to 0.236)	1045 (735.4 to 1507)	8.67e-09	2.809 (1.315 to 5.741)	17604 (6986 to 28815)	0.000158	6.089 (4.135 to 10.54)	45602 (28986 to 84176)	4.61e-08	7.253 (5.05 to 11.68)	73009 (62155 to 89089)	5.54e-09
ENSG00000001084	GCLC	A_23_P145114	0.988 (0.895 to 1.125)	2098 (1317 to 3789)	0.73	0.88 (0.794 to 1.047)	1980 (1091 to 3394)	0.0211	0.988 (0.857 to 1.199)	2077 (1556 to 3166)	0.831	1.332 (0.999 to 1.561)	3793 (2643 to 5236)	0.0026
ENSG00000001167	NFYA	A_23_P214425, A_23_P501583, A_24_P414719	1.019 (0.929 to 1.127).1.021 (0.955 to 1.094).1.03 (0.998 to 1.063)	117.9 (75.96 to 198).575.1 (308.4 to 1156).620.6 (359.8 to 1210)	0.483	0.814 (0.717 to 0.991).0.838 (0.734 to 0.955).0.973 (0.876 to 1.109)	100.4 (54.3 to 170.1).457.5 (154.5 to 850.4).625.9 (264.8 to 987.4)	0.19386	0.948 (0.878 to 1.044).0.964 (0.653 to 1.389).1.047 (0.904 to 1.161)	108 (58.62 to 191).503.6 (325.2 to 969.5).603.3 (426.3 to 939.4)	0.424333	0.793 (0.603 to 0.934).0.859 (0.699 to 1.034).1.02 (0.894 to 1.18)	127.5 (98.95 to 139.4).636.8 (483.2 to 844).825.2 (615.9 to 955.2)	0.269633
ENSG00000001460	STPG1	A_24_P133162	1.089 (1.014 to 1.233)	432.8 (169.3 to 884.5)	0.0211	1.108 (0.958 to 1.234)	449.7 (127.8 to 889.7)	0.0354	1.048 (0.982 to 1.207)	376.5 (180.2 to 751)	0.282	0.631 (0.555 to 0.715)	297.1 (158.9 to 416.5)	8.78e-05
ENSG00000001461	NIPAL3	A_23_P46604, A_24_P45367, A_24_P919419	1.02 (0.972 to 1.057).1.138 (1.069 to 1.227).1.194 (0.97 to 1.436)	118.7 (68.09 to 192.2).1438 (867 to 2486).73.04 (22.48 to 147.1)	0.1763	0.618 (0.532 to 0.734).0.845 (0.58 to 0.967).0.986 (0.794 to 1.358)	119.1 (52.78 to 259.9).55.02 (14.08 to 101.7).934.4 (446 to 1564)	0.323068	0.978 (0.775 to 1.346).1.048 (0.771 to 1.352).1.065 (0.95 to 1.131)	104.5 (56.08 to 165.7).1478 (917.3 to 2826).48.83 (24.86 to 90.85)	0.510267	0.798 (0.602 to 1.008).0.944 (0.77 to 1.098).1.043 (0.913 to 1.166)	131.9 (105.2 to 165.2).1905 (1590 to 2198).79.81 (38.18 to 118.8)	0.337867
ENSG00000001497	LAS1L	A_23_P256021	1.084 (1.053 to 1.122)	19543 (11012 to 37066)	0.0264	0.987 (0.939 to 1.044)	19982 (8017 to 39262)	0.727	0.814 (0.742 to 0.9)	15110 (8622 to 29895)	0.000848	0.485 (0.41 to 0.587)	11013 (7412 to 13629)	9.69e-06
ENSG00000001561	ENPP4	A_23_P70318	1.103 (0.934 to 1.259)	441.7 (250.7 to 719.7)	0.0218	1.253 (1.048 to 1.541)	593.8 (268 to 1259)	0.00111	0.906 (0.807 to 0.992)	376.7 (260.4 to 668.5)	0.0393	0.66 (0.467 to 0.895)	381.8 (261.1 to 479.4)	0.00188
ENSG00000001629	ANKIB1	A_23_P355623, A_24_P18020	1.037 (1.005 to 1.106).1.048 (0.951 to 1.18)	204 (99.41 to 384.9).500.7 (276.8 to 851.7)	0.2395	0.89 (0.77 to 1.065).0.969 (0.728 to 1.131)	157.7 (66.64 to 266.7).495.5 (206.9 to 833.5)	0.34645	0.913 (0.789 to 1.027).0.952 (0.766 to 1.197)	162.8 (95.61 to 280.1).417.3 (244.7 to 686.7)	0.2865	0.908 (0.564 to 1.26).0.925 (0.692 to 1.258)	230.2 (181.4 to 254.6).597.6 (308.9 to 879.1)	0.41
ENSG00000001630	CYP51A1	A_23_P257716	1.196 (1.118 to 1.3)	435.5 (261.4 to 731.7)	3.77e-05	0.774 (0.71 to 0.855)	293.1 (119.5 to 486.6)	0.000195	0.752 (0.66 to 0.875)	265.4 (186.8 to 410.2)	0.000162	0.806 (0.7 to 0.957)	413.4 (338.6 to 496.4)	0.0104
ENSG00000001631	KRIT1	A_23_P42848	1.077 (1.026 to 1.144)	894.7 (405.3 to 1755)	0.0264	1.172 (0.943 to 1.489)	924.8 (423.5 to 1512)	0.0262	1.053 (0.91 to 1.387)	778.5 (543.7 to 1339)	0.448	1.045 (0.711 to 1.459)	1091 (802.8 to 1329)	0.664
ENSG00000002016	RAD52	A_23_P64990	1.118 (1.003 to 1.292)	213.9 (137.2 to 364.9)	0.00922	1.234 (0.973 to 1.478)	244.9 (115.8 to 369.1)	0.0019	0.943 (0.762 to 1.043)	201.2 (119.4 to 260.2)	0.29	0.968 (0.784 to 1.157)	268.3 (203.2 to 365)	0.651
ENSG00000002330	BAD	A_23_P150207	0.936 (0.906 to 0.956)	1587 (828.6 to 3150)	0.0495	0.935 (0.831 to 1.001)	1699 (602.3 to 3710)	0.156	1.221 (1.142 to 1.429)	2052 (1010 to 4972)	6.85e-05	1.344 (1.163 to 1.564)	2667 (2124 to 3562)	7.13e-05
ENSG00000002549	LAP3	A_23_P18604	1.048 (0.986 to 1.092)	5513 (3123 to 10769)	0.144	0.998 (0.947 to 1.04)	5470 (2342 to 10086)	0.952	0.921 (0.844 to 1.022)	4709 (3345 to 8194)	0.0735	0.65 (0.601 to 0.777)	4159 (3310 to 4638)	0.0001
ENSG00000002586	CD99	A_23_P217510, A_24_P70993	0.967 (0.911 to 1.022).1.087 (0.979 to 1.159)	405 (294.7 to 584).6743 (3969 to 11938)	0.129	1.019 (0.981 to 1.093).1.116 (1.075 to 1.14)	399.8 (229.8 to 555.5).7967 (3663 to 12920)	0.31527	0.881 (0.73 to 1.193).0.942 (0.801 to 1.072)	338.4 (217.2 to 578.2).6710 (4131 to 11469)	0.1666	0.775 (0.632 to 1.01).0.808 (0.783 to 0.829)	409.7 (299.2 to 541.1).7309 (6236 to 9215)	0.006845
ENSG00000002726	ABP1	A_23_P59452	1.013 (0.877 to 1.234)	84.42 (45.42 to 144.9)	0.852	0.827 (0.754 to 0.987)	72.86 (42.21 to 136.1)	0.0229	1.379 (0.804 to 1.991)	111.1 (64.97 to 139.6)	0.0103	1.864 (1.353 to 2.317)	228.5 (171.5 to 310.7)	4.21e-06
ENSG00000002822	MAD1L1	A_23_P333735	1.044 (0.956 to 1.206)	1859 (810.6 to 4170)	0.227	1.01 (0.941 to 1.109)	1863 (543.1 to 3907)	0.807	0.671 (0.627 to 0.732)	1120 (514.8 to 2482)	2.01e-05	0.359 (0.295 to 0.432)	724.3 (489.7 to 1012)	4.53e-06
ENSG00000002834	LASP1	A_23_P89187	0.88 (0.79 to 1.016)	2320 (1277 to 4645)	0.0044	1.371 (1.202 to 1.486)	3811 (1707 to 6386)	1.77e-07	1.313 (1.245 to 1.37)	3444 (2133 to 5093)	2.88e-08	1.076 (0.939 to 1.239)	3625 (2431 to 5018)	0.203
ENSG00000002919	SNX11	A_23_P89343	0.96 (0.926 to 1.013)	371.4 (227.6 to 633.9)	0.202	0.891 (0.814 to 1.019)	371.6 (152.4 to 627.3)	0.0378	1.05 (0.906 to 1.357)	434.5 (219.4 to 924.2)	0.425	1.929 (1.568 to 2.331)	984.2 (797.3 to 1219)	7.55e-08
ENSG00000003056	M6PR	A_24_P210343	0.993 (0.87 to 1.087)	1015 (614.7 to 1625)	0.832	0.983 (0.84 to 1.073)	1079 (526.5 to 1663)	0.726	0.968 (0.932 to 1.038)	1036 (555.5 to 1553)	0.389	1.073 (1.018 to 1.152)	1521 (1038 to 1997)	0.176
ENSG00000003147	ICA1	A_23_P215419	0.839 (0.788 to 0.901)	390.2 (224.1 to 499.1)	0.00138	0.843 (0.702 to 1.056)	396.2 (286.7 to 573.3)	0.0122	1.166 (0.932 to 1.56)	589.9 (232.3 to 789.2)	0.0219	1.473 (1.281 to 2.051)	1073 (421.6 to 1431)	5.27e-05
ENSG00000003393	ALS2	A_23_P209430, A_23_P377664, A_24_P222410	1.06 (1.025 to 1.088).1.267 (1.096 to 1.424).1.611 (1.429 to 2.023)	109.1 (47.25 to 215.3).1242 (381.8 to 2953).1302 (609.9 to 2786)	0.0323036	0.952 (0.836 to 1.053).0.971 (0.841 to 1.138).1.013 (0.94 to 1.043)	1259 (335.8 to 2807).69.91 (23.02 to 135.4).966.2 (180.5 to 2323)	0.591	0.554 (0.459 to 0.74).0.679 (0.574 to 0.74).0.828 (0.564 to 1.547)	46.69 (17.27 to 85.42).605.7 (200.3 to 1597).746 (299.1 to 1814)	0.0826967	0.277 (0.199 to 0.328).0.383 (0.18 to 0.544).0.445 (0.311 to 0.558)	32.97 (18.45 to 44.86).386.4 (329.1 to 473.9).428.3 (254.4 to 533.6)	0.000977767
ENSG00000003400	CASP10	A_23_P209408, A_24_P139993, A_24_P3045	0.925 (0.847 to 1.001).0.947 (0.723 to 1.096).0.954 (0.924 to 0.997)	321 (167 to 575.2).413.9 (234.5 to 691.7).80.9 (45.42 to 148)	0.2253	0.884 (0.764 to 1.164).1.044 (0.917 to 1.25).1.056 (0.934 to 1.265)	359.9 (93.45 to 653.9).515 (207 to 823.9).70.22 (26.96 to 116.7)	0.289333	1.238 (1.042 to 1.553).1.273 (1.045 to 1.401).1.296 (1.102 to 1.482)	101.9 (50.72 to 204.5).434.8 (225.2 to 772.9).577.7 (341.8 to 758.1)	0.0030454	0.826 (0.608 to 0.992).1.259 (0.998 to 1.452).1.317 (1.205 to 1.394)	629.2 (371.3 to 786.7).812.9 (640.4 to 1070).90.26 (63.98 to 121.4)	0.0255881
ENSG00000003402	CFLAR	A_23_P209394, A_24_P120115	0.868 (0.807 to 0.896).0.956 (0.818 to 1.276)	118.9 (53.18 to 212).489.5 (259.5 to 928.9)	0.266535	0.902 (0.745 to 1.037).1.106 (0.896 to 1.35)	136.8 (60 to 226.5).530.7 (196.6 to 912.3)	0.0976	1.043 (0.8 to 1.586).1.273 (1.123 to 1.449)	122.3 (60.42 to 224.8).653.5 (402.4 to 1227)	0.348012	1.337 (1.089 to 1.556).2.085 (0.989 to 3.023)	412.8 (286.5 to 578.7).933.2 (696.2 to 1138)	0.00014535
ENSG00000003509	NDUFAF7	A_23_P28318	1.066 (0.996 to 1.157)	1684 (1038 to 3049)	0.0495	0.984 (0.905 to 1.07)	1561 (640.3 to 2838)	0.713	1.113 (0.967 to 1.229)	1780 (998.7 to 3412)	0.0173	0.846 (0.706 to 1.018)	1749 (1362 to 2047)	0.0391
ENSG00000003756	RBM5	A_23_P18276, A_24_P328646, A_24_P919510	0.926 (0.862 to 0.991).0.997 (0.882 to 1.175).1.011 (0.654 to 1.663)	13105 (6026 to 26312).36.34 (11.47 to 65.09).4448 (2331 to 8786)	0.640533	1.002 (0.93 to 1.06).1.016 (0.282 to 2.071).1.027 (0.98 to 1.064)	15046 (5043 to 28829).30.37 (15.39 to 54.32).4266 (1721 to 7299)	0.793	1.109 (1.085 to 1.138).1.113 (1.012 to 1.202).1.132 (0.548 to 2.194)	15059 (8310 to 30882).30.37 (15.49 to 44.99).4695 (2721 to 7457)	0.18585	1.314 (0.748 to 2.223).1.37 (1.169 to 1.544).1.405 (1.262 to 1.58)	23388 (19133 to 28927).64.55 (43.35 to 102).7530 (6164 to 8371)	0.0327108
ENSG00000004059	ARF5	A_23_P254601, A_24_P394702	0.999 (0.848 to 1.166).1.009 (0.917 to 1.168)	1172 (700.5 to 1985).1843 (926 to 3630)	0.8865	0.959 (0.892 to 1.063).0.962 (0.906 to 1.073)	1187 (622.1 to 2009).1737 (554 to 3236)	0.356	1.045 (0.914 to 1.327).1.07 (0.929 to 1.365)	1265 (791.7 to 2268).1976 (1035 to 4346)	0.3555	1.717 (1.38 to 2.136).1.723 (1.334 to 2.442)	2705 (2270 to 3477).4300 (2906 to 7045)	2.0665e-05
ENSG00000004142	POLDIP2	A_24_P142442	1.053 (1.001 to 1.095)	7180 (3399 to 14337)	0.0923	1.003 (0.972 to 1.038)	7468 (2699 to 15392)	0.944	0.924 (0.865 to 0.977)	6305 (3689 to 13956)	0.0624	0.642 (0.566 to 0.759)	5351 (4671 to 7155)	0.000135
ENSG00000004399	PLXND1	A_23_P80752, A_24_P376391	1.286 (1.199 to 1.348).1.518 (1.221 to 2.166)	206.4 (88.68 to 409.7).5604 (3046 to 11494)	8.975e-05	0.821 (0.718 to 0.882).0.85 (0.72 to 0.989)	103.9 (60.29 to 156.4).3514 (1752 to 5379)	0.019755	0.549 (0.475 to 0.628).0.553 (0.518 to 0.589)	2388 (1385 to 3963).73.83 (38.57 to 113.1)	0.0008585	0.594 (0.554 to 0.625).0.599 (0.469 to 0.814)	109.6 (71.98 to 143.2).3321 (2456 to 3901)	0.00043325
ENSG00000004455	AK2	A_23_P200404, A_24_P179903, A_24_P500891	0.996 (0.955 to 1.034).1 (0.958 to 1.038).1.048 (0.977 to 1.086)	14625 (8360 to 26858).5090 (2773 to 10782).9070 (5513 to 15115)	0.6536	0.998 (0.887 to 1.09).1.05 (0.863 to 1.185).1.077 (0.911 to 1.185)	18498 (7588 to 38302).4648 (2184 to 9008).9957 (5273 to 17287)	0.479	0.821 (0.734 to 0.954).0.86 (0.739 to 1.05).0.981 (0.942 to 1.011)	13389 (6992 to 29748).4617 (2540 to 7913).7863 (4611 to 13890)	0.201203	0.383 (0.351 to 0.403).0.505 (0.477 to 0.55).0.674 (0.596 to 0.736)	4079 (2973 to 4825).5722 (4792 to 6754).7687 (6023 to 9352)	6.63233e-05
ENSG00000004468	CD38	A_23_P167328	0.458 (0.402 to 0.508)	210 (144 to 280.2)	3.66e-10	2.248 (1.191 to 4.071)	1102 (602.1 to 1906)	0.000284	11.26 (6.875 to 19.58)	5956 (4513 to 8777)	5.18e-09	14.22 (9.052 to 21.9)	10602 (8983 to 11896)	3e-10
ENSG00000004478	FKBP4	A_23_P128372, A_32_P71788	1.071 (1.035 to 1.112).1.383 (1.198 to 1.624)	530.5 (242.6 to 1024).5070 (2521 to 9379)	0.0166533	0.83 (0.667 to 0.958).0.89 (0.842 to 0.942)	326.3 (111.1 to 646.4).4174 (1850 to 7525)	0.01885	0.734 (0.673 to 0.846).0.844 (0.801 to 0.897)	275.7 (146.9 to 545.1).3783 (1915 to 7612)	0.00309	0.229 (0.178 to 0.289).0.675 (0.495 to 1.066)	119.9 (75.51 to 167.1).3627 (1973 to 6251)	0.00621
ENSG00000004487	KDM1A	A_24_P74981	1.155 (1.031 to 1.357)	600.1 (325.6 to 1236)	0.00153	0.888 (0.788 to 1.062)	448.1 (191.4 to 810.2)	0.0362	0.809 (0.751 to 0.864)	393.2 (245.9 to 632)	0.000387	0.64 (0.439 to 0.985)	450.4 (273.5 to 683.2)	0.00411
ENSG00000004534	RBM6	A_23_P57941	1.096 (0.923 to 1.314)	1377 (750.4 to 2400)	0.0649	0.873 (0.831 to 0.899)	1133 (474.7 to 1780)	0.0061	1.01 (0.906 to 1.106)	1252 (679.9 to 1830)	0.818	0.911 (0.842 to 1.022)	1460 (1133 to 1944)	0.142
ENSG00000004660	CAMKK1	A_23_P431933	0.926 (0.778 to 1.101)	179.6 (84.18 to 385.7)	0.212	0.723 (0.518 to 0.883)	153.5 (61.62 to 279.5)	0.0013	1.496 (1.211 to 1.919)	288.2 (171.5 to 549.5)	5.3e-05	2.916 (2.399 to 3.446)	975.5 (736.3 to 1200)	5.72e-10
ENSG00000004700	RECQL	A_23_P25215	1.017 (0.966 to 1.076)	1439 (927.2 to 2652)	0.519	1.038 (0.984 to 1.1)	1498 (751.4 to 2391)	0.322	1.03 (0.911 to 1.108)	1425 (1031 to 1946)	0.46	0.709 (0.627 to 0.777)	1384 (1185 to 1773)	0.000388
ENSG00000004766	CCDC132	A_24_P409219	1.1 (0.855 to 1.389)	78.7 (45.2 to 134.7)	0.252	1.123 (0.936 to 1.332)	80.02 (26.47 to 131.2)	0.155	1.048 (0.932 to 1.243)	71.78 (56.76 to 109)	0.528	0.934 (0.879 to 1.002)	89.99 (71.87 to 108.4)	0.343
ENSG00000004776	HSPB6	A_24_P308029	0.943 (0.682 to 1.115)	51.19 (25.6 to 91.1)	0.6	1.003 (0.859 to 1.214)	61.67 (32.22 to 134.5)	0.972	1.002 (0.751 to 1.177)	57.62 (23.05 to 135)	0.983	1.04 (0.817 to 1.197)	94.09 (54.47 to 147.9)	0.642
ENSG00000004777	ARHGAP33	A_23_P404730, A_24_P10674	0.959 (0.843 to 1.073).1.014 (0.872 to 1.291)	73.1 (34.49 to 144.3).88628 (49005 to 161282)	0.711	0.826 (0.557 to 1.145).0.989 (0.85 to 1.273)	60.43 (23.05 to 119.2).97956 (61267 to 179320)	0.4985	0.825 (0.437 to 1.041).1.033 (0.854 to 1.193)	100090 (50060 to 228772).75.21 (37.59 to 145.4)	0.3455	1.086 (0.802 to 1.426).1.432 (1.177 to 1.835)	139058 (123398 to 158836).158.6 (94.85 to 230.5)	0.177084
ENSG00000004779	NDUFAB1	A_23_P140960	1.042 (0.953 to 1.141)	15086 (9454 to 27640)	0.21	1.06 (0.98 to 1.107)	17552 (6832 to 34689)	0.129	0.867 (0.81 to 0.953)	13434 (7883 to 28776)	0.00499	0.592 (0.578 to 0.61)	10963 (8466 to 13163)	1.33e-05
ENSG00000004809	SLC22A16	A_23_P42004	1.055 (1.01 to 1.085)	2815 (1828 to 4858)	0.0955	0.813 (0.735 to 0.87)	2310 (928.1 to 4074)	0.000671	0.892 (0.782 to 0.99)	2374 (1638 to 4265)	0.03	0.725 (0.525 to 0.866)	2509 (1734 to 3211)	0.00626
ENSG00000004838	ZMYND10	A_23_P18266, A_23_P29663	0.904 (0.696 to 1.002).1.039 (0.978 to 1.072)	39.78 (18.25 to 78.43).3166 (1776 to 6178)	0.305	0.9 (0.812 to 1.009).1.058 (0.802 to 1.29)	2821 (1163 to 5773).47.83 (14.35 to 103.2)	0.3409	1.014 (0.467 to 2).1.04 (0.97 to 1.155)	3159 (1816 to 6302).49.91 (21.06 to 96.69)	0.623	1.012 (0.936 to 1.119).1.322 (0.976 to 1.931)	3804 (3232 to 4681).95.34 (42.89 to 155.6)	0.4236
ENSG00000004848	ARX	A_23_P306223	0.958 (0.667 to 1.579)	45.61 (30.99 to 76.07)	0.74	0.889 (0.353 to 1.743)	52.1 (27.27 to 97.89)	0.543	0.946 (0.807 to 1.113)	49.59 (26.07 to 85.02)	0.603	1.105 (0.742 to 1.649)	92.63 (48.51 to 165.7)	0.382
ENSG00000004864	SLC25A13	A_23_P82334, A_32_P157402	0.979 (0.842 to 1.146).0.992 (0.953 to 1.03)	328.3 (185.8 to 554.2).418.1 (257.6 to 769.1)	0.7155	0.968 (0.881 to 1.072).0.98 (0.704 to 1.229)	329.8 (176.8 to 410.6).416.9 (245.2 to 721.8)	0.622	0.886 (0.765 to 1.059).0.958 (0.841 to 1.128)	303.1 (183.6 to 431.3).376.2 (294.4 to 578.1)	0.22075	0.939 (0.821 to 1.112).1.046 (0.776 to 1.298)	519.1 (439.7 to 570.5).529.6 (376.3 to 788.4)	0.475
ENSG00000004866	ST7	A_23_P215735, A_24_P141019	0.996 (0.885 to 1.163).1.159 (0.975 to 1.596)	663.4 (381.5 to 1153).74.55 (46.29 to 136.3)	0.51335	0.884 (0.753 to 1.041).0.887 (0.767 to 1.06)	578.6 (263.5 to 992.5).61.43 (29.43 to 109.6)	0.10415	1.049 (0.999 to 1.13).1.098 (0.874 to 1.437)	67.67 (45.69 to 110.8).681 (434.1 to 1143)	0.2525	0.749 (0.64 to 0.886).0.768 (0.653 to 0.92)	67.41 (52.72 to 90.25).670.5 (464.3 to 922.1)	0.006315
ENSG00000004897	CDC27	A_23_P66777	1.048 (0.864 to 1.183)	1108 (591.2 to 2120)	0.291	1.057 (0.948 to 1.203)	1113 (545.6 to 1923)	0.193	1.005 (0.933 to 1.09)	1040 (638.7 to 2099)	0.896	0.879 (0.766 to 1.06)	1154 (927 to 1347)	0.0885
ENSG00000004939	SLC4A1	A_23_P77980	0.996 (0.863 to 1.319)	221.3 (144.3 to 330)	0.943	1.076 (0.985 to 1.281)	303.5 (161 to 674.7)	0.13	1.024 (0.91 to 1.335)	252.5 (137.8 to 403.3)	0.674	0.863 (0.755 to 0.993)	295 (217.6 to 387.4)	0.0439
ENSG00000004961	HCCS	A_23_P257945	1.034 (0.979 to 1.121)	2593 (1433 to 5114)	0.248	0.969 (0.853 to 1.17)	2462 (1135 to 4753)	0.568	0.929 (0.813 to 1.03)	2294 (1365 to 4257)	0.141	0.593 (0.522 to 0.739)	1868 (1526 to 2429)	6.86e-05
ENSG00000004975	DVL2	A_23_P55342	1.043 (0.925 to 1.144)	388.9 (227.8 to 685.2)	0.249	0.776 (0.714 to 0.819)	301.3 (134.3 to 507.2)	0.0013	1.019 (0.929 to 1.088)	382.7 (235.3 to 733.2)	0.643	1.056 (1.003 to 1.098)	521.2 (431.3 to 655)	0.291
ENSG00000005007	UPF1	A_24_P194154	0.978 (0.906 to 1.056)	17237 (8960 to 33048)	0.448	1.07 (0.997 to 1.145)	19721 (7554 to 38340)	0.0934	1.035 (0.861 to 1.161)	17336 (10661 to 31238)	0.52	0.929 (0.88 to 1.035)	21455 (17241 to 26701)	0.229
ENSG00000005020	SKAP2	A_23_P157128	0.968 (0.843 to 1.149)	1318 (775.7 to 2419)	0.447	0.882 (0.799 to 0.997)	1157 (677.9 to 1589)	0.0184	1.34 (1.104 to 1.692)	1759 (1267 to 2328)	0.000195	1.891 (1.612 to 2.302)	3431 (2361 to 4113)	9.77e-08
ENSG00000005022	SLC25A5	A_23_P137057, A_23_P436179, A_24_P182182, A_24_P182183	1.001 (0.936 to 1.038).1.004 (0.933 to 1.052).1.046 (0.987 to 1.147).1.055 (0.967 to 1.211)	23155 (14017 to 41495).36604 (18245 to 68872).38272 (20238 to 73342).41031 (23721 to 75063)	0.54075	0.919 (0.813 to 0.983).0.921 (0.79 to 1.002).0.923 (0.823 to 0.984).0.978 (0.948 to 1.026)	24981 (13467 to 46083).35526 (15598 to 66909).37718 (17131 to 73310).43314 (25101 to 77794)	0.20865	1.06 (1 to 1.134).1.072 (0.871 to 1.432).1.075 (0.866 to 1.339).1.089 (0.965 to 1.218)	25855 (17192 to 44914).37876 (23499 to 70743).40085 (25112 to 77189).46822 (30729 to 84930)	0.173725	1.038 (0.819 to 1.382).1.072 (0.715 to 1.751).1.082 (0.749 to 1.61).1.125 (0.939 to 1.522)	36189 (30053 to 44544).54098 (36333 to 91537).57449 (40243 to 94753).60271 (49045 to 78146)	0.4795
ENSG00000005059	CCDC109B	A_23_P255376	0.8 (0.692 to 0.897)	124 (32.1 to 291.6)	0.0141	1.103 (0.973 to 1.292)	176 (47.96 to 430.5)	0.138	0.956 (0.623 to 1.443)	145.7 (33.78 to 389.8)	0.695	1.263 (1.017 to 1.658)	204.8 (125.5 to 306.9)	0.00625
ENSG00000005075	POLR2J	A_23_P42649, A_24_P292020	0.961 (0.926 to 1.011).0.974 (0.948 to 1)	1922 (1324 to 3003).3882 (2346 to 7163)	0.27	1.028 (0.948 to 1.106).1.053 (0.977 to 1.112)	2275 (1199 to 3854).4275 (1873 to 7483)	0.327	0.968 (0.905 to 1.074).0.98 (0.892 to 1.071)	2026 (1502 to 3450).3836 (2557 to 7201)	0.517	1.276 (1.145 to 1.555).1.29 (1.082 to 1.683)	3429 (2911 to 3922).6651 (5195 to 9439)	0.001885
ENSG00000005100	DHX33	A_23_P130141, A_24_P364970	1.183 (1.137 to 1.25).1.297 (1.045 to 2.036)	40.59 (27.59 to 61.27).943.3 (419.9 to 1884)	0.022432	0.834 (0.578 to 1.264).0.9 (0.707 to 1.015)	29.7 (13.12 to 60.12).698.2 (223.2 to 1285)	0.1925	0.818 (0.609 to 1).0.853 (0.713 to 1.33)	25.89 (15.07 to 43.27).591.3 (371 to 1005)	0.20375	0.459 (0.221 to 0.633).0.473 (0.35 to 0.643)	19.96 (10.58 to 30.64).466.3 (275.5 to 640.1)	0.0067167
ENSG00000005156	LIG3	A_23_P501134, A_24_P119519	1.195 (0.98 to 1.413).1.221 (1.119 to 1.453)	319.4 (150.8 to 637.7).84.24 (41.48 to 193.9)	0.0188945	0.809 (0.597 to 0.999).0.809 (0.736 to 0.906)	204.4 (95.11 to 350.5).53.24 (23.06 to 88.2)	0.03119	0.98 (0.851 to 1.045).0.99 (0.803 to 1.192)	263.8 (163.5 to 472.7).66.76 (34.89 to 129)	0.7835	0.641 (0.301 to 0.967).0.76 (0.562 to 0.935)	254.5 (159.6 to 321.8).55.65 (32.45 to 67.27)	0.0237
ENSG00000005175	RPAP3	A_23_P2683	1.072 (0.802 to 1.299)	806.9 (530.7 to 1530)	0.00222	0.869 (0.644 to 1.069)	692.5 (425.8 to 1241)	0.00566	0.996 (0.799 to 1.249)	753.8 (504.9 to 1422)	0.907	0.756 (0.578 to 1.021)	799 (532.4 to 1091)	0.00113
ENSG00000005187	ACSM3	A_23_P317756	1.254 (0.94 to 1.666)	169.5 (50.51 to 394.3)	0.0198	0.701 (0.512 to 0.82)	103 (22.32 to 243)	0.00264	0.95 (0.85 to 1.143)	114.3 (43.36 to 258.2)	0.483	0.384 (0.172 to 0.535)	67.87 (17.55 to 135)	0.000314
ENSG00000005189	AC004381.6	A_23_P49459	1.072 (0.95 to 1.192)	455.5 (272.9 to 852)	0.0486	1.023 (0.929 to 1.098)	443.3 (221 to 680.9)	0.564	1.055 (0.932 to 1.218)	446.9 (278.9 to 834.6)	0.268	0.843 (0.71 to 0.964)	498.1 (357.1 to 633.7)	0.0327
ENSG00000005194	CIAPIN1	A_23_P88781, A_32_P204381	1.059 (1.022 to 1.128).1.061 (1.002 to 1.133)	1072 (638.8 to 1780).2442 (1341 to 4318)	0.05265	0.928 (0.866 to 1.033).0.952 (0.876 to 1.104)	2372 (1163 to 4465).916.9 (562.1 to 1606)	0.20185	0.905 (0.838 to 0.998).0.92 (0.832 to 0.986)	2015 (1209 to 3989).909.6 (589.6 to 1512)	0.0488	0.747 (0.632 to 0.904).0.809 (0.648 to 1.066)	2083 (1702 to 2670).997.9 (803.1 to 1297)	0.019245
ENSG00000005206	SPPL2B	A_23_P79066, A_32_P161447	0.986 (0.917 to 1.034).1.006 (0.823 to 1.416)	1592 (721.1 to 3268).25755 (16695 to 40975)	0.7845	0.982 (0.828 to 1.127).0.997 (0.871 to 1.304)	1541 (475.7 to 2882).30982 (19965 to 46589)	0.8515	0.96 (0.895 to 1.005).1.137 (0.942 to 1.276)	1491 (738.3 to 3126).30717 (19479 to 59265)	0.15895	0.901 (0.686 to 1.096).1.248 (0.99 to 1.545)	1743 (1187 to 2064).46813 (40035 to 55809)	0.118075
ENSG00000005238	FAM214B	A_23_P43380	0.989 (0.751 to 1.224)	222.4 (133.5 to 396.3)	0.871	1.008 (0.886 to 1.11)	281.9 (134 to 608.2)	0.864	1.02 (0.844 to 1.359)	332.1 (98.54 to 890.3)	0.797	1.145 (0.916 to 1.249)	416 (296.2 to 623.8)	0.0334
ENSG00000005302	MSL3	A_23_P217778, A_23_P353514	0.807 (0.391 to 1.148).1.01 (0.958 to 1.035)	52.94 (24.32 to 108).809.6 (495 to 1307)	0.453	0.879 (0.616 to 1.354).0.999 (0.899 to 1.1)	40.4 (18.94 to 77.94).857.3 (405.5 to 1487)	0.6735	1.115 (0.925 to 1.26).1.186 (0.856 to 1.635)	55.68 (35.62 to 86.05).915.5 (559.8 to 1754)	0.07555	0.865 (0.561 to 1.109).1.044 (0.905 to 1.31)	1130 (860.5 to 1242).64.22 (47.92 to 73.13)	0.379
ENSG00000005339	CREBBP	A_23_P163850, A_24_P322025	0.821 (0.531 to 1.115).0.908 (0.775 to 1.056)	114.3 (52.41 to 276.6).607.4 (390.4 to 1100)	0.02725	0.996 (0.58 to 1.345).1.252 (1.047 to 1.386)	142.4 (61.23 to 307.5).821.5 (480.8 to 1184)	0.481108	0.925 (0.812 to 1.068).1.003 (0.537 to 1.373)	126.9 (79.67 to 266.5).622.8 (464 to 951.2)	0.551	1.1 (0.815 to 1.443).1.282 (1.061 to 1.481)	1158 (1013 to 1540).206.8 (115.3 to 377.1)	0.061851
ENSG00000005379	BZRAP1	A_23_P152559, A_24_P113131	0.988 (0.955 to 1.014).1.009 (0.981 to 1.048)	3104 (807.4 to 8080).4206 (1321 to 10026)	0.721	0.741 (0.602 to 0.879).0.761 (0.652 to 0.928)	2172 (425.2 to 5608).3378 (877.3 to 8036)	0.0003755	1.081 (1.003 to 1.167).1.114 (0.943 to 1.248)	3028 (978.5 to 8667).4120 (1678 to 10523)	0.0368	0.863 (0.48 to 1.181).0.864 (0.453 to 1.254)	3337 (769.7 to 7570).4372 (1240 to 8618)	0.3545
ENSG00000005381	MPO	A_23_P141173	1.164 (1.006 to 1.343)	192593 (124310 to 344676)	0.00117	0.971 (0.848 to 1.181)	192723 (125896 to 297621)	0.583	0.782 (0.572 to 0.925)	175230 (116606 to 248999)	0.00863	0.542 (0.444 to 0.808)	212122 (151976 to 285695)	0.000372
ENSG00000005436	GCFC2	A_23_P120062, A_24_P51037	0.998 (0.937 to 1.086).1.079 (1.031 to 1.155)	1376 (792.3 to 2562).205.3 (101.6 to 395.2)	0.49135	0.956 (0.885 to 1.001).1.031 (0.822 to 1.183)	1266 (625.8 to 2114).248.6 (117.1 to 511.7)	0.4265	0.705 (0.694 to 0.719).0.948 (0.806 to 1.068)	205.6 (87.82 to 456.5).898 (643.1 to 1610)	0.170015	0.35 (0.318 to 0.406).0.67 (0.49 to 0.766)	198.3 (138.8 to 249.4).567.8 (474.7 to 660.5)	0.00028028
ENSG00000005448	WDR54	A_23_P68072	0.957 (0.919 to 1.014)	897 (294.2 to 2077)	0.158	1.135 (1.07 to 1.283)	1102 (311.2 to 2812)	0.00434	1.082 (1.049 to 1.111)	997.4 (353.1 to 2789)	0.0277	0.889 (0.779 to 1.073)	899.4 (471.4 to 1720)	0.104
ENSG00000005483	MLL5	A_24_P196704, A_24_P411863	0.921 (0.834 to 0.986).0.945 (0.788 to 1.095)	131.8 (72.16 to 263.3).1363 (690.6 to 2471)	0.16565	0.901 (0.764 to 1.078).0.979 (0.742 to 1.234)	142 (40.61 to 287.7).1476 (560.3 to 2482)	0.4495	0.968 (0.795 to 1.133).1.004 (0.781 to 1.215)	141.6 (76.17 to 312).1409 (758.6 to 2386)	0.761	1.209 (1.106 to 1.297).1.352 (1.128 to 1.579)	247.9 (152.8 to 352.2).2574 (1849 to 3384)	0.0008805
ENSG00000005486	RHBDD2	A_23_P8561	0.774 (0.708 to 0.85)	215.1 (71.78 to 496.6)	7.13e-05	1.138 (1 to 1.4)	315.3 (101.9 to 676)	0.02	1.156 (0.999 to 1.299)	287.8 (146.2 to 679.9)	0.00809	3.279 (2.618 to 3.775)	1208 (652.2 to 2262)	1.2e-11
ENSG00000005513	SOX8	A_23_P66137, A_24_P65292	0.936 (0.756 to 1.295).0.988 (0.865 to 1.143)	155.5 (85.32 to 243.9).4680 (2734 to 8921)	0.5885	1.002 (0.908 to 1.089).1.066 (0.913 to 1.347)	163 (110.1 to 274.6).5849 (3379 to 9191)	0.6245	0.988 (0.862 to 1.076).1.186 (0.928 to 1.379)	186.8 (73.92 to 324.7).5394 (3576 to 7765)	0.408785	1.286 (1.11 to 1.451).1.298 (1.003 to 1.546)	310.8 (198 to 371.2).7798 (5940 to 12405)	0.0011605
ENSG00000005700	IBTK	A_23_P358995, A_24_P929724	1.133 (1.072 to 1.203).1.176 (1.064 to 1.332)	274 (146.3 to 451.6).3689 (1975 to 6890)	0.0014725	0.943 (0.866 to 1.052).1.077 (0.862 to 1.247)	270.6 (82.73 to 427.5).3285 (1392 to 6130)	0.2065	0.814 (0.598 to 1.056).0.978 (0.817 to 1.054)	189.5 (116.5 to 269.2).3078 (2366 to 5114)	0.32805	0.617 (0.491 to 0.763).0.792 (0.635 to 0.895)	230.7 (146.5 to 378).3302 (3124 to 3819)	0.003746
ENSG00000005801	ZNF195	A_23_P252748	1.042 (0.843 to 1.314)	1039 (333 to 2573)	0.193	1.005 (0.593 to 1.202)	927.3 (281 to 2083)	0.929	1.047 (0.78 to 1.274)	962.4 (366.3 to 2540)	0.201	0.975 (0.597 to 1.345)	1060 (681.6 to 1611)	0.691
ENSG00000005810	MYCBP2	A_23_P151459, A_24_P323815	1.02 (0.949 to 1.062).1.192 (0.998 to 1.356)	1578 (996 to 2919).5630 (3284 to 9874)	0.222595	0.799 (0.591 to 1.094).0.872 (0.586 to 1.135)	1061 (675 to 1463).4556 (2785 to 6885)	0.0946	0.794 (0.647 to 1.049).0.828 (0.6 to 1.052)	1014 (795 to 1382).4329 (3242 to 6915)	0.02409	0.795 (0.575 to 1.009).0.798 (0.608 to 0.963)	1374 (1170 to 1665).5801 (3891 to 6769)	0.02715
ENSG00000005844	ITGAL	A_23_P206806	1.042 (0.934 to 1.169)	1000 (598.4 to 1690)	0.237	1.087 (0.849 to 1.416)	1093 (510.7 to 1581)	0.263	1.046 (0.969 to 1.16)	1028 (644.7 to 1778)	0.256	0.93 (0.783 to 1.165)	1261 (999.8 to 1772)	0.358
ENSG00000005889	ZFX	A_24_P290527, A_24_P940524	1.016 (0.842 to 1.161).1.277 (1.064 to 1.627)	202.8 (124.3 to 349.5).204.6 (127.8 to 351.9)	0.365125	0.99 (0.702 to 1.328).1.091 (0.998 to 1.347)	150.1 (63.13 to 241.1).237.5 (103.2 to 399)	0.5175	0.702 (0.594 to 0.848).0.891 (0.764 to 1.094)	113.9 (49.91 to 185.7).179.2 (121.8 to 299)	0.0353845	0.719 (0.341 to 1.012).0.761 (0.634 to 0.947)	164.5 (97.71 to 255).222.4 (190.4 to 253.3)	0.034935
ENSG00000005893	LAMP2	A_23_P217447, A_23_P416608	0.915 (0.817 to 0.999).1.003 (0.946 to 1.06)	3447 (2097 to 6193).954.9 (560.9 to 1535)	0.46605	0.87 (0.824 to 0.94).1.008 (0.921 to 1.054)	3853 (1702 to 6571).904.9 (433.8 to 1711)	0.42599	1.165 (1.048 to 1.289).1.242 (1.001 to 1.405)	1129 (816.2 to 2129).4488 (3143 to 6774)	0.000701	1.391 (1.065 to 1.6).1.449 (1.22 to 1.69)	1859 (1485 to 2405).6694 (5355 to 7774)	6.36e-05
ENSG00000005955	GGNBP2	A_23_P38408, A_24_P67892	1.034 (0.957 to 1.139).1.077 (1.011 to 1.134)	1633 (1059 to 2675).2446 (1446 to 4514)	0.1408	0.959 (0.789 to 1.2).0.959 (0.877 to 1.032)	1635 (941.9 to 2688).2180 (1273 to 3334)	0.428	0.938 (0.82 to 1.075).0.939 (0.913 to 0.966)	1486 (973.5 to 2633).2273 (1439 to 3806)	0.1555	1.066 (0.758 to 1.392).1.238 (1.087 to 1.343)	2553 (1969 to 2987).3348 (2068 to 4222)	0.2503
ENSG00000005961	ITGA2B	A_24_P65373	1.097 (0.98 to 1.303)	71.31 (28.83 to 157.4)	0.304	0.954 (0.769 to 1.41)	65.04 (26.96 to 157.3)	0.66	1.059 (0.981 to 1.19)	77.39 (26.39 to 153.1)	0.51	0.942 (0.826 to 0.996)	91.05 (53.6 to 147.3)	0.427
ENSG00000005981	ASB4	A_23_P157205	0.953 (0.711 to 1.079)	222.5 (135.1 to 355)	0.417	1.064 (0.871 to 1.275)	275.5 (160.1 to 503.8)	0.268	0.931 (0.752 to 1.05)	286.9 (126 to 542)	0.2	0.893 (0.794 to 1.199)	306.8 (242.8 to 362.9)	0.147
ENSG00000006007	GDE1	A_23_P54758	0.968 (0.901 to 1.068)	1044 (569.1 to 2132)	0.321	0.921 (0.758 to 1.036)	981.3 (565.4 to 1724)	0.138	1.054 (0.892 to 1.157)	1094 (744.3 to 1913)	0.279	1.499 (1.212 to 1.966)	1991 (1512 to 2545)	7.82e-05
ENSG00000006015	C19orf60	A_23_P67589	0.963 (0.88 to 1.026)	5962 (3727 to 10585)	0.221	0.881 (0.82 to 0.968)	5715 (2719 to 10100)	0.0125	1.076 (0.975 to 1.24)	7071 (3860 to 14575)	0.0998	1.096 (1.062 to 1.153)	8766 (6949 to 9885)	0.0715
ENSG00000006047	YBX2	A_23_P49865	0.979 (0.884 to 1.034)	95.81 (46.49 to 180.4)	0.712	0.852 (0.604 to 1.055)	127.3 (30.24 to 328.1)	0.0954	0.999 (0.853 to 1.247)	129.1 (37.04 to 305.3)	0.988	1.151 (0.952 to 1.304)	200.7 (104.2 to 388.9)	0.033
ENSG00000006062	MAP3K14	A_23_P207319	0.97 (0.873 to 1.089)	196 (82.85 to 390.9)	0.516	1.053 (0.989 to 1.132)	226.5 (61.31 to 496.5)	0.267	0.917 (0.783 to 0.991)	181.6 (79.24 to 430.5)	0.129	0.88 (0.703 to 1.042)	255.8 (166.1 to 419.8)	0.12
ENSG00000006075	CCL3	A_23_P321920, A_24_P228130	0.467 (0.414 to 0.578).0.561 (0.476 to 0.631)	44.4 (21.33 to 72.81).99.26 (39.38 to 219.5)	9.295e-06	1.094 (0.783 to 1.489).1.125 (0.642 to 2.018)	199.2 (79.1 to 421.1).202.4 (65.56 to 484.9)	0.382	0.569 (0.355 to 1.008).0.782 (0.558 to 1.175)	163.8 (61.48 to 354.8).69.03 (34.79 to 172.1)	0.02171	0.933 (0.531 to 2.279).0.95 (0.577 to 1.798)	263.3 (85.77 to 575.1).276.3 (115 to 571.7)	0.726
ENSG00000006114	SYNRG	A_23_P207541, A_23_P351695, A_23_P396626	1.012 (0.701 to 1.246).1.033 (0.848 to 1.719).1.067 (0.992 to 1.194)	359.4 (164.9 to 743.1).62.69 (21.23 to 124.8).84.94 (41.58 to 164)	0.5874	0.972 (0.919 to 1.058).1.032 (0.773 to 1.666).1.125 (0.811 to 1.44)	327.8 (131.4 to 593.5).71.47 (24.12 to 118.9).81.91 (26.8 to 161.4)	0.493333	1.08 (0.872 to 1.358).1.114 (0.963 to 1.277).1.136 (0.732 to 2.307)	358.9 (219.1 to 783.2).56.69 (21.5 to 122.5).89.58 (50.89 to 173)	0.266467	1.531 (1.109 to 1.911).1.607 (1.367 to 1.798).1.878 (1.607 to 2.202)	132 (84.09 to 208.8).164.9 (135.6 to 229).819.8 (596.1 to 1074)	3.49404e-05
ENSG00000006125	AP2B1	A_23_P55149, A_24_P253827	1.031 (0.891 to 1.182).1.142 (1.058 to 1.196)	1352 (571 to 2645).803.5 (525.3 to 1228)	0.237595	0.998 (0.865 to 1.076).1.057 (0.972 to 1.127)	1258 (482.4 to 2228).778.2 (442.4 to 1163)	0.5535	0.842 (0.731 to 0.984).0.901 (0.831 to 0.966)	1047 (630 to 2213).650.6 (517.5 to 986.2)	0.01393	0.68 (0.566 to 0.772).0.993 (0.927 to 1.053)	1548 (1133 to 2075).672.9 (586.7 to 779.6)	0.450657
ENSG00000006194	ZNF263	A_23_P140978	1.078 (0.959 to 1.247)	467.3 (260.8 to 881.2)	0.0562	0.838 (0.775 to 0.9)	374.5 (163.7 to 682.9)	0.00194	0.928 (0.778 to 1.034)	387.9 (213.1 to 753.9)	0.156	0.847 (0.746 to 1.034)	486.4 (351.7 to 675.4)	0.0319
ENSG00000006210	CX3CL1	A_24_P381901	1.043 (0.908 to 1.376)	55.9 (36.66 to 91.42)	0.64	0.927 (0.794 to 1.074)	58.06 (32.27 to 95.51)	0.362	1.019 (0.711 to 1.442)	49.69 (27.66 to 78.09)	0.875	1.08 (0.865 to 1.367)	86.86 (58.24 to 134.1)	0.389
ENSG00000006282	SPATA20	A_23_P118633	0.924 (0.775 to 1.013)	164.7 (91.72 to 285.7)	0.0971	0.97 (0.87 to 1.058)	194.4 (104.5 to 313.8)	0.507	1.118 (1.019 to 1.328)	241.8 (123.9 to 456.7)	0.0325	1.602 (1.35 to 1.955)	464.5 (317.8 to 607.9)	2.67e-06
ENSG00000006327	TNFRSF12A	A_23_P49338	1.043 (0.991 to 1.106)	194.9 (60.2 to 422.2)	0.334	0.785 (0.493 to 1.37)	126.2 (55.41 to 208.3)	0.0861	0.925 (0.714 to 1.171)	163.2 (65.3 to 293.2)	0.312	2.29 (1.552 to 3.77)	543.4 (424 to 761.8)	3.13e-05
ENSG00000006451	RALA	A_23_P168479, A_24_P192262	0.979 (0.812 to 1.133).1.06 (0.951 to 1.123)	1124 (736.4 to 1730).1684 (842.1 to 3226)	0.344	1.077 (1.012 to 1.178).1.129 (1.008 to 1.31)	1463 (721.3 to 2279).1844 (642.4 to 3842)	0.04115	0.848 (0.675 to 0.997).0.872 (0.736 to 1)	1040 (667.3 to 1890).1300 (716.8 to 2632)	0.0207	0.456 (0.294 to 0.591).0.596 (0.383 to 0.792)	1138 (886 to 1325).764.2 (433.2 to 1010)	0.0009495
ENSG00000006530	AGK	A_23_P309224	1.15 (0.986 to 1.307)	443.4 (283.3 to 737.9)	0.00245	1.005 (0.947 to 1.117)	401.4 (210.4 to 672.8)	0.897	0.967 (0.932 to 1.021)	373.2 (234.5 to 558.5)	0.384	0.738 (0.617 to 0.904)	403.7 (311.2 to 504.4)	0.00237
ENSG00000006534	ALDH3B1	A_24_P218688	1.052 (0.985 to 1.15)	959 (538.6 to 1808)	0.0996	0.855 (0.787 to 0.931)	786.5 (419.4 to 1414)	0.00363	1.091 (0.94 to 1.404)	1018 (576 to 1860)	0.183	1.262 (1.185 to 1.308)	1506 (1305 to 1718)	7.84e-05
ENSG00000006576	PHTF2	A_24_P175176	0.976 (0.858 to 1.043)	323.9 (186.6 to 589.8)	0.488	0.81 (0.767 to 0.869)	297 (107.9 to 548.7)	0.000572	1.016 (0.733 to 1.288)	352.9 (201.5 to 782)	0.854	1.082 (0.668 to 1.71)	462.1 (327 to 710.4)	0.546
ENSG00000006625	GGCT	A_23_P42695	0.993 (0.91 to 1.065)	17500 (10857 to 29011)	0.81	0.946 (0.874 to 0.993)	20295 (9934 to 36959)	0.189	1.027 (0.955 to 1.112)	19827 (13252 to 35460)	0.468	0.595 (0.532 to 0.678)	14763 (11299 to 17124)	3.83e-05
ENSG00000006634	DBF4	A_23_P254612	1.018 (0.777 to 1.355)	1255 (716.1 to 2457)	0.462	1.006 (0.792 to 1.397)	1334 (697.8 to 2860)	0.886	0.971 (0.784 to 1.269)	1206 (826.8 to 2504)	0.429	0.652 (0.445 to 0.808)	1093 (634.8 to 1399)	0.000234
ENSG00000006638	TBXA2R	A_23_P355471	0.929 (0.854 to 0.988)	1315 (803.5 to 2235)	0.0219	1.023 (0.913 to 1.246)	1808 (876.3 to 3366)	0.671	1.171 (1.056 to 1.427)	1821 (900.6 to 3973)	0.00511	1.454 (1.137 to 1.703)	2845 (2001 to 3537)	4.75e-05
ENSG00000006652	IFRD1	A_24_P137897	0.999 (0.933 to 1.101)	1223 (693 to 2229)	0.978	1.104 (1.023 to 1.173)	1408 (515.8 to 2579)	0.0122	1.09 (1.004 to 1.214)	1333 (731.7 to 2458)	0.0319	0.788 (0.696 to 0.904)	1266 (895.5 to 1632)	0.00473
ENSG00000006695	COX10	A_23_P55123	1.245 (1.092 to 1.43)	135.4 (69.18 to 239)	0.000855	0.837 (0.667 to 0.999)	107.3 (40.78 to 219.8)	0.032	0.962 (0.831 to 1.201)	111.7 (73 to 214.4)	0.565	0.736 (0.631 to 0.846)	110.8 (75.54 to 164)	0.00248
ENSG00000006704	GTF2IRD1	A_23_P111621	0.923 (0.875 to 0.981)	644.5 (388.9 to 1086)	0.0261	1.105 (1.045 to 1.164)	816.4 (384 to 1396)	0.0114	1.109 (0.995 to 1.224)	742.1 (564.5 to 1165)	0.0203	1.007 (0.768 to 1.266)	959.5 (726 to 1071)	0.929
ENSG00000006712	PAF1	A_23_P142272, A_24_P216087	0.951 (0.848 to 1.03).0.952 (0.89 to 1.027)	1478 (887 to 2477).622.8 (342.7 to 1171)	0.1325	1.083 (1.021 to 1.136).1.162 (1.039 to 1.224)	1905 (905.3 to 3133).719.9 (285.9 to 1222)	0.0195905	0.953 (0.824 to 1.113).1.014 (0.864 to 1.21)	1582 (927 to 2537).599.3 (346.5 to 959.8)	0.577	0.988 (0.924 to 1.093).1.034 (0.825 to 1.148)	2141 (1744 to 2698).829.9 (654.2 to 959)	0.728
ENSG00000006715	VPS41	A_23_P215318, A_23_P320684, A_32_P25823	0.971 (0.902 to 1.001).0.987 (0.802 to 1.231).0.992 (0.918 to 1.072)	173.7 (101.9 to 336.1).362.8 (160.5 to 794.4).453.8 (265.4 to 817)	0.686	0.797 (0.606 to 1.035).0.829 (0.678 to 1.023).0.872 (0.814 to 0.956)	145.4 (45.63 to 222.9).309.9 (130.5 to 580.9).409.1 (190.8 to 753.7)	0.0128967	1.092 (0.984 to 1.245).1.214 (1.025 to 1.432).1.215 (1.091 to 1.379)	206.3 (115.7 to 419.7).376.9 (256.4 to 632.7).540.6 (353.3 to 914.5)	0.0215482	1.673 (1.533 to 1.852).1.727 (1.327 to 2.643).1.765 (1.622 to 1.936)	1006 (872.8 to 1103).433.8 (381.3 to 575.8).815 (613.6 to 1074)	5.66674e-05
ENSG00000006744	ELAC2	A_23_P38254, A_23_P38262, A_24_P133822	1.052 (1.011 to 1.116).1.064 (0.99 to 1.109).1.086 (1.049 to 1.17)	10927 (6581 to 20364).1994 (1187 to 4021).21975 (13397 to 40077)	0.0573333	0.875 (0.788 to 1.013).0.905 (0.849 to 0.973).0.931 (0.862 to 1.006)	10108 (3787 to 19424).19419 (10829 to 30650).1604 (774.3 to 2675)	0.0536667	0.833 (0.748 to 0.903).0.85 (0.749 to 0.992).0.863 (0.816 to 0.911)	18215 (12742 to 28414).1481 (922.1 to 2695).9141 (5441 to 18753)	0.00412	0.56 (0.465 to 0.7).0.634 (0.531 to 0.726).0.664 (0.608 to 0.76)	16375 (14863 to 18186).1434 (1142 to 1626).8444 (5935 to 10556)	9.72e-05
ENSG00000006756	ARSD	A_23_P217712	1.014 (0.841 to 1.131)	82.07 (50.51 to 150.1)	0.83	0.934 (0.859 to 1.105)	78.73 (43.82 to 112.7)	0.31	0.967 (0.804 to 1.116)	73.09 (54.14 to 97.12)	0.644	1.105 (0.86 to 1.392)	143.1 (102.1 to 203.2)	0.2
ENSG00000006757	PNPLA4	A_23_P159797, A_24_P943815	0.979 (0.934 to 1.057).0.995 (0.8 to 1.21)	3267 (1692 to 6342).60.15 (24.95 to 125.5)	0.6995	1.045 (0.993 to 1.139).1.293 (0.978 to 1.799)	101.8 (31.28 to 229.8).3864 (1363 to 8605)	0.1393	0.909 (0.685 to 1.219).1.078 (1.009 to 1.2)	3583 (2072 to 7957).66.06 (36.37 to 156.6)	0.23645	0.824 (0.763 to 0.929).0.888 (0.667 to 1.401)	3408 (2416 to 4823).74.14 (50.7 to 88.13)	0.1671
ENSG00000006831	ADIPOR2	A_23_P48121, A_24_P13376	0.938 (0.855 to 1.022).1.045 (0.92 to 1.133)	171 (117.3 to 259.9).4025 (2066 to 8049)	0.18305	1.092 (0.982 to 1.212).1.145 (1.042 to 1.392)	206.8 (89.97 to 375.6).4669 (2040 to 7475)	0.02945	0.951 (0.861 to 1.026).1.05 (0.944 to 1.138)	161.2 (116.9 to 255.5).4311 (2740 to 7184)	0.27	0.901 (0.813 to 1.023).1.232 (0.99 to 1.461)	215.8 (180.6 to 264.9).6430 (5502 to 7557)	0.062045
ENSG00000006837	CDKL3	A_23_P110643	0.887 (0.711 to 1.312)	47.05 (28.93 to 77.14)	0.296	1.094 (0.963 to 1.194)	58.29 (28.29 to 106)	0.272	1.237 (1.031 to 1.508)	70.16 (37.3 to 143.6)	0.031	1.118 (0.642 to 1.742)	82.03 (65.22 to 91.76)	0.372
ENSG00000007038	PRSS21	A_23_P129602	1.03 (0.877 to 1.097)	446.4 (405.3 to 497.1)	0.4	1.078 (0.886 to 1.294)	478.7 (371.3 to 681.3)	0.197	0.812 (0.689 to 0.894)	352.2 (218.8 to 435.3)	0.00157	0.223 (0.173 to 0.306)	153.5 (73.43 to 261.4)	0.000234
ENSG00000007047	MARK4	A_23_P107714	0.975 (0.918 to 1.009)	149 (61.76 to 326.8)	0.579	0.952 (0.858 to 1.15)	144.4 (75.3 to 316)	0.407	1.134 (0.96 to 1.343)	183.3 (62.3 to 466.6)	0.0563	1.185 (1.032 to 1.494)	243.7 (150.8 to 376.2)	0.0151
ENSG00000007080	CCDC124	A_23_P342118	1.027 (0.963 to 1.07)	2353 (1412 to 4057)	0.417	1.062 (0.95 to 1.186)	2577 (1319 to 4214)	0.18	0.825 (0.72 to 0.956)	1967 (1130 to 3873)	0.00235	0.556 (0.521 to 0.61)	1677 (1336 to 2113)	1.17e-05
ENSG00000007168	PAFAH1B1	A_23_P118888, A_24_P113086, A_24_P356406	0.894 (0.85 to 0.954).1.04 (1 to 1.102).1.11 (1.009 to 1.205)	1577 (782.2 to 3204).223.4 (130.9 to 416.9).899.6 (503.2 to 1714)	0.0742433	0.766 (0.667 to 0.867).0.827 (0.75 to 0.949).1.291 (1.246 to 1.331)	160.7 (88.39 to 268.7).2371 (1097 to 4180).730.3 (378 to 1284)	0.00093337	1.009 (0.934 to 1.141).1.098 (1.018 to 1.174).1.114 (0.922 to 1.328)	193.5 (136.9 to 319).1808 (1249 to 2939).936.9 (588.3 to 1940)	0.308933	0.925 (0.885 to 0.95).0.944 (0.753 to 1.19).1.199 (1 to 1.384)	1045 (925.2 to 1235).256.4 (180 to 346.7).2579 (2236 to 3098)	0.22025
ENSG00000007202	KIAA0100	A_23_P207614	0.968 (0.9 to 1.051)	9425 (4301 to 17971)	0.282	0.824 (0.765 to 0.902)	8272 (3226 to 15316)	0.00078	1.012 (0.946 to 1.089)	9603 (5583 to 18249)	0.753	1.159 (1.043 to 1.267)	13536 (9629 to 17457)	0.00996
ENSG00000007216	SLC13A2	A_23_P107307	0.953 (0.857 to 1.052)	186.4 (104.5 to 356)	0.242	0.947 (0.844 to 1.11)	207.7 (97.56 to 385.1)	0.321	0.974 (0.892 to 1.055)	184.2 (103.9 to 354.5)	0.585	1.036 (0.972 to 1.124)	271.5 (208.4 to 348.3)	0.514
ENSG00000007255	TRAPPC6A	A_24_P390928	0.939 (0.898 to 0.983)	2438 (1213 to 5072)	0.0472	0.929 (0.874 to 1.017)	2444 (880.1 to 4544)	0.0903	1.241 (1.15 to 1.409)	3005 (1661 to 5373)	6.04e-05	1.467 (1.334 to 1.696)	4471 (3340 to 5868)	8.92e-07
ENSG00000007264	MATK	A_23_P50678	1.01 (0.929 to 1.142)	2162 (1227 to 3790)	0.763	1.011 (0.934 to 1.075)	2291 (1089 to 4277)	0.778	0.926 (0.872 to 1.033)	2057 (1049 to 4119)	0.0769	0.378 (0.319 to 0.477)	1046 (773.8 to 1307)	3.66e-06
ENSG00000007341	ST7L	A_23_P1117, A_23_P310582	0.911 (0.778 to 1.269).0.926 (0.804 to 1.017)	40.35 (26.12 to 71.64).89.75 (60.7 to 149.2)	0.3135	0.975 (0.777 to 1.194).1.059 (0.815 to 1.193)	108 (63.44 to 149.3).47.78 (25.22 to 72.76)	0.5815	1.033 (0.816 to 1.261).1.154 (0.975 to 1.25)	119.9 (83.58 to 181.1).52.55 (29.8 to 98.91)	0.38365	0.978 (0.837 to 1.089).1.064 (0.947 to 1.286)	156.2 (117.7 to 200.7).81.73 (72.97 to 91.03)	0.574
ENSG00000007350	TKTL1	A_23_P259901	0.896 (0.725 to 1.514)	53.77 (31.48 to 104.4)	0.35	1.035 (0.799 to 1.347)	63.39 (26.39 to 134.2)	0.749	1.011 (0.726 to 1.361)	52.32 (27.17 to 88.19)	0.925	1.109 (0.795 to 1.665)	104.3 (74.72 to 167.2)	0.306
ENSG00000007376	RPUSD1	A_23_P49269	1.037 (0.982 to 1.08)	2925 (1759 to 5308)	0.203	0.947 (0.903 to 1.009)	2970 (1346 to 5736)	0.182	0.924 (0.806 to 1.009)	2784 (1528 to 5579)	0.0958	0.805 (0.703 to 0.897)	2839 (2073 to 3597)	0.00699
ENSG00000007392	LUC7L	A_23_P106737	1.128 (1.026 to 1.197)	993.6 (654.3 to 1581)	0.00125	1.085 (0.995 to 1.256)	1100 (477.9 to 2113)	0.092	0.96 (0.886 to 1.163)	902.6 (477.5 to 1815)	0.424	0.797 (0.682 to 0.935)	951.3 (723.6 to 1184)	0.00765
ENSG00000007520	TSR3	A_23_P88753	1.029 (0.991 to 1.1)	2707 (1666 to 4944)	0.315	0.922 (0.865 to 0.976)	2429 (1209 to 4202)	0.0647	0.944 (0.825 to 1.033)	2476 (1427 to 4360)	0.222	0.765 (0.69 to 0.816)	2537 (2232 to 2797)	0.00156
ENSG00000007541	PIGQ	A_23_P502609, A_24_P316257, A_24_P359205	0.935 (0.866 to 1.097).1.035 (0.937 to 1.179).1.062 (0.971 to 1.174)	710.7 (313.8 to 1395).823.6 (529 to 1373).98.03 (53.08 to 178.4)	0.231	0.943 (0.89 to 1).0.974 (0.855 to 1.088).1.008 (0.677 to 1.436)	109.9 (52.8 to 222.8).682 (194.3 to 1269).782.1 (350.7 to 1306)	0.553	0.944 (0.837 to 1.03).0.974 (0.942 to 1.001).1.089 (0.955 to 1.401)	118.3 (51.27 to 256.9).652.5 (332.4 to 1360).734.3 (421.8 to 1261)	0.308	0.558 (0.478 to 0.742).0.981 (0.854 to 1.172).1.625 (1.271 to 2.093)	234 (180.9 to 312.8).559.9 (437 to 753.8).850.3 (603.2 to 1021)	0.258022
ENSG00000007545	CRAMP1L	A_23_P407992, A_24_P51279, A_32_P151437	1.017 (0.966 to 1.066).1.173 (1.024 to 1.461).1.208 (0.98 to 1.521)	158.5 (63.7 to 285.1).3160 (1532 to 6498).92.27 (43.45 to 160.2)	0.197467	0.645 (0.396 to 0.844).0.854 (0.706 to 0.953).0.972 (0.645 to 1.344)	136.2 (55.52 to 189.1).2536 (1018 to 4079).57.74 (38.9 to 82.61)	0.264377	0.687 (0.588 to 0.846).0.904 (0.493 to 1.593).1.006 (0.798 to 1.164)	2821 (1769 to 4456).61.45 (32.27 to 86.77).81.17 (43.73 to 127.2)	0.464856	0.639 (0.554 to 0.794).0.817 (0.714 to 0.965).0.979 (0.93 to 1.086)	124.5 (78.91 to 194.2).3464 (2504 to 3958).88.61 (52.14 to 121.3)	0.244795
ENSG00000007866	TEAD3	A_23_P82000, A_23_P82002	0.87 (0.684 to 1.053).0.885 (0.864 to 0.921)	548.7 (323.1 to 1016).75.94 (41.86 to 126)	0.049005	0.975 (0.79 to 1.258).1.035 (0.978 to 1.103)	750.4 (400 to 1564).84.39 (43.99 to 164.8)	0.5505	1.036 (0.947 to 1.162).1.161 (1.001 to 1.481)	101.4 (38.74 to 161).706.9 (367.4 to 1568)	0.2163	1.261 (1.094 to 1.52).1.415 (0.832 to 3.318)	1088 (851.7 to 1707).213.3 (99.32 to 454.7)	0.052972
ENSG00000007923	DNAJC11	A_24_P413735	1.022 (0.97 to 1.054)	275.2 (183.2 to 459.3)	0.45	0.979 (0.883 to 1.051)	281.5 (131.9 to 409.7)	0.636	0.783 (0.701 to 0.863)	207.3 (133.7 to 307.4)	0.000353	0.44 (0.389 to 0.509)	170.9 (137.9 to 223.7)	3.59e-06
ENSG00000007944	MYLIP	A_23_P31041, A_24_P917123	1.094 (0.92 to 1.303).1.112 (0.976 to 1.278)	157.7 (84.59 to 301.5).277.6 (157 to 496.9)	0.0694	0.612 (0.409 to 0.918).0.748 (0.548 to 0.964)	112.9 (47.34 to 204.9).171.2 (53.25 to 300.7)	0.004114	0.738 (0.484 to 1.115).0.754 (0.468 to 1.187)	116.6 (56.53 to 239.1).211.1 (90.48 to 446.4)	0.03675	1.414 (0.834 to 1.95).1.745 (1.072 to 2.805)	304.9 (146.7 to 421.9).629.5 (335.4 to 966.1)	0.0079585
ENSG00000007968	E2F2	A_23_P125990, A_23_P408955	0.693 (0.662 to 0.746).0.933 (0.817 to 1.035)	4009 (2901 to 5943).615.4 (441.4 to 1017)	0.04465	1.13 (0.953 to 1.258).1.204 (1.053 to 1.385)	7907 (3304 to 12814).877.9 (511.5 to 1726)	0.010855	1.123 (0.942 to 1.315).1.204 (1.029 to 1.379)	7409 (5557 to 12393).860.8 (429.6 to 1869)	0.021237	1.045 (0.88 to 1.252).1.186 (0.925 to 1.407)	1003 (610.9 to 1317).8962 (6668 to 11652)	0.26795
ENSG00000008018	PSMB1	A_23_P156531, A_24_P233570	1.019 (0.987 to 1.081).1.035 (0.996 to 1.101)	32023 (17955 to 62684).79724 (45598 to 158230)	0.36	1.043 (0.971 to 1.109).1.065 (1.009 to 1.086)	38017 (14239 to 80097).96181 (41154 to 200616)	0.1751	0.865 (0.787 to 0.957).0.867 (0.808 to 0.967)	27509 (15955 to 56644).77838 (41917 to 164950)	0.00571	0.564 (0.525 to 0.648).0.639 (0.556 to 0.721)	28499 (23523 to 40807).75139 (59929 to 98540)	5.63e-05
ENSG00000008056	SYN1	A_23_P500824	1.05 (0.852 to 1.497)	16573 (9266 to 29284)	0.544	1.055 (0.866 to 1.445)	19150 (11044 to 35054)	0.494	1.147 (0.989 to 1.222)	20480 (11412 to 46106)	0.00281	1.319 (0.909 to 1.868)	27815 (25314 to 30844)	0.012
ENSG00000008083	JARID2	A_23_P214876	0.9 (0.683 to 1.063)	3145 (2155 to 4969)	0.0938	0.842 (0.64 to 1.086)	3134 (1849 to 4767)	0.0402	0.927 (0.777 to 1.064)	3455 (2240 to 6972)	0.162	1.196 (0.976 to 1.428)	5509 (4044 to 8127)	0.00975
ENSG00000008128	CDK11A	A_23_P217804, A_23_P501460, A_24_P312915, A_24_P355772, A_24_P96709	1.025 (0.959 to 1.121).1.029 (1.006 to 1.064).1.044 (0.978 to 1.105).1.186 (0.971 to 1.339).1.375 (1.273 to 1.554)	1487 (901.8 to 2900).2585 (1360 to 5333).78.07 (40.17 to 134).7272 (3922 to 12493).837.4 (451.4 to 1562)	0.193593	0.894 (0.856 to 0.971).0.896 (0.828 to 0.992).0.967 (0.868 to 1.085).0.983 (0.67 to 1.269).0.997 (0.839 to 1.248)	1159 (532.2 to 1715).2286 (916.4 to 3932).54.16 (24.82 to 75.66).6129 (2147 to 9318).810.1 (336.3 to 1508)	0.46904	0.805 (0.626 to 1.103).0.894 (0.739 to 1.023).0.967 (0.85 to 1.055).0.997 (0.946 to 1.049).1.018 (0.97 to 1.066)	1333 (848.7 to 2101).2492 (1571 to 4356).57.88 (30.48 to 88.72).5326 (2161 to 8474).732.1 (424.7 to 1384)	0.46024	0.666 (0.528 to 0.854).0.694 (0.346 to 1.103).0.918 (0.824 to 1.031).0.979 (0.878 to 1.085).0.983 (0.826 to 1.15)	1748 (1299 to 2019).3119 (2327 to 3563).59.22 (37.34 to 85.49).5984 (2968 to 10452).971.1 (705.7 to 1191)	0.357046
ENSG00000008130	NADK	A_24_P389994	1.024 (0.949 to 1.12)	245 (150.5 to 443.5)	0.503	1.052 (0.988 to 1.134)	256.3 (134.7 to 416.5)	0.221	1.03 (0.92 to 1.149)	244.3 (143.9 to 402.5)	0.527	0.871 (0.751 to 0.965)	284.2 (240.1 to 336.4)	0.0498
ENSG00000008256	CYTH3	A_23_P111593	1.191 (1.039 to 1.353)	64.73 (46.41 to 78.94)	0.0155	0.9 (0.49 to 1.352)	57.68 (28.92 to 98.4)	0.43	0.905 (0.705 to 1.068)	54.52 (38.21 to 74.34)	0.301	0.58 (0.342 to 0.919)	82.2 (24.86 to 154.9)	0.00718
ENSG00000008277	ADAM22	A_23_P215625, A_24_P355006, A_32_P180395	1.051 (0.847 to 1.429).1.139 (0.876 to 1.493).1.222 (0.85 to 1.508)	62.56 (19.08 to 144.9).72.87 (20.99 to 203.2).77.25 (47.4 to 131.5)	0.328667	0.822 (0.646 to 0.964).0.922 (0.719 to 1.348).0.926 (0.76 to 1.112)	52.65 (13.29 to 140.5).54.7 (9.682 to 141.8).80.52 (42.64 to 159.7)	0.400333	0.938 (0.744 to 1.125).1.084 (0.677 to 1.757).1.146 (0.829 to 2.019)	51.31 (24.1 to 103.9).57.53 (27.13 to 140.1).75.99 (32.22 to 159.4)	0.473	0.399 (0.168 to 0.785).0.441 (0.255 to 0.643).0.665 (0.427 to 1.146)	29.11 (14.87 to 46.49).43.33 (20.06 to 84.56).53.74 (33.37 to 68.76)	0.0119183
ENSG00000008282	SYPL1	A_23_P93881, A_24_P141005	0.97 (0.89 to 1.06).1.043 (0.988 to 1.104)	342.2 (199.7 to 584.3).6249 (3593 to 11113)	0.246	0.921 (0.88 to 0.967).0.963 (0.848 to 1.114)	365.2 (191.2 to 604.2).5971 (3455 to 10325)	0.2672	0.946 (0.833 to 1.042).0.954 (0.769 to 1.099)	340.3 (247 to 491.5).5754 (4082 to 10165)	0.3225	0.975 (0.674 to 1.54).1.214 (1.108 to 1.335)	511.5 (383.8 to 720.8).9239 (7816 to 11551)	0.42055
ENSG00000008294	SPAG9	A_23_P207476, A_24_P365025, A_24_P8454, A_24_P942469	0.968 (0.88 to 1.04).0.983 (0.95 to 1.018).0.986 (0.838 to 1.057).1.076 (0.894 to 1.564)	108.4 (65.13 to 202.1).1327 (791.2 to 2499).333.8 (148.4 to 590.7).58.87 (37.02 to 106.7)	0.53175	0.875 (0.673 to 1.324).0.995 (0.818 to 1.239).1.012 (0.913 to 1.091).1.205 (0.984 to 1.647)	130.6 (64.02 to 210).1372 (669.3 to 2360).353.5 (197.5 to 619.1).43.96 (25.35 to 60.32)	0.496925	0.87 (0.466 to 1.457).0.886 (0.675 to 1.019).0.896 (0.659 to 1.047).0.976 (0.904 to 1.097)	1249 (771.1 to 2262).278.5 (204.3 to 520).47.68 (29.88 to 72.05).99.88 (59.8 to 191.7)	0.289475	0.669 (0.564 to 0.768).0.926 (0.783 to 1.035).1.044 (0.84 to 1.674).1.39 (1.304 to 1.528)	111.9 (65.75 to 155).1626 (1316 to 1944).586.8 (427 to 719.6).83.2 (39.41 to 106.1)	0.234379
ENSG00000008323	PLEKHG6	A_24_P301063	1.059 (0.887 to 1.318)	59.18 (37.63 to 92)	0.518	0.995 (0.922 to 1.188)	59.6 (43.26 to 99.7)	0.946	1.163 (0.844 to 1.601)	66.95 (33.2 to 114.2)	0.158	1.105 (0.937 to 1.255)	91.79 (67.16 to 112)	0.187
ENSG00000008324	SS18L2	A_23_P166698	0.964 (0.886 to 1.083)	13235 (7792 to 25367)	0.283	0.87 (0.819 to 0.925)	13799 (5730 to 28189)	0.00486	1.065 (1.023 to 1.118)	15637 (8787 to 33107)	0.0741	1.066 (0.882 to 1.186)	18576 (16899 to 21417)	0.318
ENSG00000008382	MPND	A_23_P130886, A_24_P44931	0.934 (0.85 to 0.986).0.984 (0.935 to 1.026)	1132 (443.8 to 2545).866.7 (371 to 2058)	0.31745	0.937 (0.794 to 1.029).0.942 (0.849 to 1.004)	1157 (305.6 to 2579).816.6 (318.3 to 1672)	0.2	0.988 (0.955 to 1.021).0.99 (0.952 to 1.029)	1087 (552.9 to 2632).816 (456.4 to 1762)	0.7585	1.827 (1.493 to 2.094).2.498 (1.786 to 3.173)	2595 (2211 to 2960).2596 (1917 to 3718)	1.162e-07
ENSG00000008394	MGST1	A_23_P36658	1.095 (1.023 to 1.158)	14790 (10465 to 22381)	0.011	0.994 (0.953 to 1.032)	14667 (8249 to 23475)	0.871	0.944 (0.876 to 1.001)	13074 (9145 to 20990)	0.153	0.508 (0.432 to 0.646)	9373 (5103 to 13952)	2.27e-05
ENSG00000008405	CRY1	A_23_P36665, A_24_P407235	1.142 (0.89 to 1.316).1.212 (1.069 to 1.43)	162.5 (85.17 to 254.3).388.3 (209.6 to 768.1)	0.0106745	0.994 (0.924 to 1.165).1.048 (0.781 to 1.63)	151.3 (97.57 to 226.5).305.5 (154.5 to 546.9)	0.7535	0.808 (0.719 to 0.87).0.818 (0.687 to 1.033)	113.8 (88.3 to 187.6).242.9 (148.6 to 440.3)	0.005516	0.494 (0.353 to 0.706).0.608 (0.519 to 0.683)	109.5 (63.17 to 147).251.6 (181.5 to 315.3)	7.2e-05
ENSG00000008441	NFIX	A_24_P858698	1.16 (1.074 to 1.337)	611.2 (325.1 to 946.9)	0.000813	0.868 (0.649 to 1.184)	452.2 (319.8 to 569.6)	0.0963	0.993 (0.935 to 1.091)	501.1 (312.5 to 782.4)	0.861	0.547 (0.459 to 0.67)	415.2 (255 to 633.5)	3.1e-05
ENSG00000008513	ST3GAL1	A_23_P31893, A_23_P31896	0.883 (0.834 to 0.943).0.916 (0.841 to 0.976)	1429 (701.6 to 2771).1519 (798.7 to 2744)	0.009215	0.962 (0.827 to 1.139).0.992 (0.832 to 1.137)	1524 (471 to 2820).1769 (694.5 to 2967)	0.6885	1.036 (0.952 to 1.205).1.078 (0.96 to 1.286)	1597 (913 to 3135).1811 (1110 to 3542)	0.2875	1.628 (1.425 to 1.995).1.636 (1.472 to 1.939)	3287 (2788 to 4323).3594 (3178 to 4149)	4.61e-07
ENSG00000008516	MMP25	A_23_P206656, A_23_P376557	0.865 (0.75 to 1.032).1.023 (0.952 to 1.14)	110.3 (68.82 to 169.3).117.6 (55.48 to 181.2)	0.33565	0.951 (0.7 to 1.139).1.049 (0.873 to 1.323)	129 (69.13 to 255.2).144.8 (55.48 to 344.2)	0.481	0.967 (0.805 to 1.442).0.993 (0.899 to 1.073)	117.4 (47.07 to 279.7).122.8 (43.85 to 231.2)	0.8085	0.97 (0.863 to 1.146).1.62 (1.128 to 2.796)	176.7 (98.87 to 279.7).306.5 (181.3 to 438.7)	0.327327
ENSG00000008710	PKD1	A_23_P77502, A_24_P238046, A_24_P482206	1.004 (0.913 to 1.077).1.117 (1.07 to 1.197).1.178 (0.994 to 1.332)	120.4 (51.22 to 236).474 (252.7 to 904.7).821.7 (275.2 to 1576)	0.30143	0.733 (0.534 to 1.006).0.926 (0.599 to 1.267).1.157 (0.968 to 1.298)	601.4 (172.1 to 1247).630.5 (174.6 to 936.3).73.58 (25.02 to 112.9)	0.161847	0.769 (0.566 to 1.011).0.799 (0.568 to 1.018).0.8 (0.721 to 0.861)	365.5 (184.5 to 720).502.8 (253.7 to 771.9).77.98 (35.37 to 127.9)	0.0158743	0.577 (0.449 to 0.714).0.817 (0.604 to 1.016).0.837 (0.656 to 1.025)	118.9 (54.01 to 168).513.5 (303.8 to 818.4).529 (278.4 to 763.8)	0.0318969
ENSG00000008735	MAPK8IP2	A_23_P502078	0.94 (0.829 to 1.021)	60.49 (34.42 to 97.53)	0.434	0.954 (0.86 to 1.101)	70.55 (44.72 to 118.8)	0.508	1.107 (1.007 to 1.208)	81.42 (33.02 to 173.8)	0.199	1.201 (0.942 to 1.795)	131.2 (69.74 to 210.1)	0.0698
ENSG00000008838	MED24	A_23_P124760	1.028 (0.97 to 1.092)	949 (593.7 to 1630)	0.339	0.998 (0.917 to 1.058)	907.2 (570.7 to 1338)	0.969	0.937 (0.88 to 1.038)	878.8 (540.6 to 1230)	0.127	0.941 (0.842 to 1.043)	1184 (935.1 to 1464)	0.325
ENSG00000008853	RHOBTB2	A_23_P20427	0.794 (0.667 to 0.859)	743.9 (307.2 to 1553)	3.24e-05	1.021 (0.826 to 1.137)	1027 (273.3 to 2264)	0.669	1.169 (1.097 to 1.261)	1008 (499.1 to 2183)	0.000213	1.296 (1.023 to 1.704)	1374 (834.2 to 1788)	0.00468
ENSG00000008869	HEATR5B	A_32_P389118	1.021 (0.98 to 1.074)	332.7 (199.9 to 570.5)	0.47	0.936 (0.853 to 1.008)	322.2 (130.2 to 556.7)	0.148	1.038 (0.889 to 1.192)	341.2 (239 to 531.9)	0.457	1.335 (1.162 to 1.579)	598.2 (548.7 to 689.5)	6.02e-05
ENSG00000008952	SEC62	A_23_P144224, A_23_P357856, A_23_P357860, A_24_P285880	0.93 (0.807 to 1.07).0.94 (0.735 to 1.237).0.953 (0.912 to 1.009).0.983 (0.955 to 1.019)	55.39 (23.8 to 105.7).579.1 (285.8 to 1167).760.6 (495.1 to 1306).980.5 (629 to 1608)	0.333625	0.93 (0.875 to 1.034).0.947 (0.653 to 1.212).0.981 (0.866 to 1.061).0.984 (0.866 to 1.19)	1028 (523.4 to 1609).59.49 (28.32 to 101.5).665.1 (230.4 to 1390).792.5 (284.8 to 1505)	0.5345	0.924 (0.84 to 1.036).0.954 (0.722 to 1.149).1.026 (0.992 to 1.049).1.073 (0.992 to 1.139)	53.13 (29.52 to 82.9).599.1 (349.7 to 1228).828.8 (556 to 1445).977.7 (642 to 1330)	0.315475	1.106 (0.905 to 1.312).1.312 (1.074 to 1.74).1.531 (1.134 to 2.34).1.771 (1.538 to 2.186)	122.6 (106.8 to 144.8).1322 (1092 to 1794).1382 (1122 to 1642).1535 (1207 to 1769)	0.0353776
ENSG00000008988	RPS20	A_23_P168898, A_32_P110243	1.006 (0.97 to 1.07).1.022 (0.952 to 1.126)	131779 (75500 to 238853).173381 (112005 to 290763)	0.644	1.002 (0.944 to 1.047).1.02 (0.968 to 1.136)	168216 (103948 to 307090).204238 (136301 to 336956)	0.7875	1.013 (0.876 to 1.182).1.033 (0.95 to 1.127)	157542 (88074 to 317100).195549 (108777 to 386168)	0.5955	0.985 (0.866 to 1.11).1.018 (0.86 to 1.148)	219439 (194815 to 257049).279610 (243222 to 310266)	0.7925
ENSG00000009307	CSDE1	A_23_P74595, A_24_P51485	0.995 (0.93 to 1.079).1.036 (0.968 to 1.136)	15914 (10746 to 25808).6702 (3258 to 11600)	0.552	1.053 (0.974 to 1.136).1.14 (0.948 to 1.399)	18479 (10691 to 27465).7318 (3805 to 9822)	0.10735	0.926 (0.712 to 1.187).1.005 (0.829 to 1.115)	16413 (12139 to 23534).5970 (4046 to 7863)	0.6205	0.882 (0.766 to 1.019).1.038 (0.924 to 1.263)	19738 (14833 to 23255).9135 (7004 to 12499)	0.3243
ENSG00000009335	UBE3C	A_23_P59481, A_24_P265135	1.059 (0.932 to 1.179).1.064 (0.746 to 1.357)	79.36 (45.29 to 127.2).863.8 (471.8 to 1658)	0.283	0.859 (0.622 to 1.318).0.977 (0.955 to 1)	65.1 (25.71 to 114.6).773 (285.3 to 1499)	0.3625	0.757 (0.566 to 0.981).0.982 (0.903 to 1.056)	64.24 (37.96 to 131.7).742.6 (432.9 to 1337)	0.32745	0.465 (0.384 to 0.512).0.906 (0.764 to 1.022)	49.86 (39.24 to 54.57).937.9 (710.5 to 1141)	0.0855132
ENSG00000009413	REV3L	A_23_P214139	1.015 (0.969 to 1.038)	1541 (945.9 to 2995)	0.582	0.93 (0.814 to 1.038)	1383 (803.8 to 2254)	0.14	0.832 (0.644 to 1.053)	1201 (1047 to 1553)	0.0191	0.97 (0.787 to 1.169)	1884 (1503 to 2345)	0.684
ENSG00000009709	PAX7	A_23_P500985	0.998 (0.907 to 1.111)	76.44 (39.66 to 130.9)	0.979	0.999 (0.839 to 1.17)	104.6 (54.02 to 172.5)	0.982	0.965 (0.656 to 1.322)	87.3 (41.35 to 192)	0.712	0.821 (0.695 to 1.053)	106.3 (66.35 to 163.2)	0.0338
ENSG00000009724	MASP2	A_23_P301971	0.992 (0.807 to 1.363)	62.2 (36.68 to 110)	0.934	1.013 (0.888 to 1.183)	73.97 (53.42 to 130.2)	0.852	1.015 (0.788 to 1.237)	73.81 (28.15 to 126.1)	0.873	1.565 (0.86 to 4.462)	224.8 (72.11 to 505.5)	0.0776
ENSG00000009780	FAM76A	A_23_P321473, A_32_P196854	1.059 (1.015 to 1.174).1.095 (0.949 to 1.337)	144.4 (91.69 to 271.1).171.5 (82.03 to 372.8)	0.13535	0.885 (0.49 to 1.141).0.923 (0.732 to 1.095)	135.8 (64.34 to 201.8).148.4 (75.72 to 263.6)	0.2435	0.887 (0.703 to 1.112).1.009 (0.905 to 1.17)	127 (77.8 to 193.9).144.7 (76.53 to 215)	0.4995	0.84 (0.577 to 1.308).0.878 (0.783 to 1.036)	168.1 (121.4 to 208.6).187.4 (168.9 to 207.5)	0.11205
ENSG00000009790	TRAF3IP3	A_23_P323761, A_23_P334414	0.777 (0.734 to 0.82).0.791 (0.749 to 0.818)	2015 (1152 to 4014).3087 (1638 to 5656)	2.9175e-05	1.268 (1.084 to 1.489).1.275 (1.123 to 1.59)	3223 (1474 to 5783).5424 (2123 to 10884)	0.000252	1.619 (1.558 to 1.738).1.65 (1.495 to 1.876)	4068 (2536 to 7120).6305 (3809 to 11935)	2.91865e-11	2.192 (1.79 to 2.586).2.301 (1.828 to 2.614)	10993 (7833 to 13759).7131 (5446 to 8750)	1.045e-08
ENSG00000009830	POMT2	A_24_P111134	0.995 (0.948 to 1.046)	353.5 (138.6 to 781.2)	0.867	1.025 (0.998 to 1.091)	360.6 (117 to 778.1)	0.536	0.897 (0.714 to 1.037)	316.2 (130.9 to 739.5)	0.0801	0.732 (0.561 to 0.938)	304.8 (199.4 to 378.8)	0.00481
ENSG00000009844	VTA1	A_23_P42368, A_24_P294982	1.035 (0.882 to 1.273).1.04 (0.963 to 1.139)	311.6 (197.3 to 549.6).610.2 (359.7 to 1141)	0.3735	0.981 (0.84 to 1.082).0.986 (0.794 to 1.429)	325.6 (143.4 to 641.5).561.8 (273.7 to 1008)	0.784	0.858 (0.731 to 0.991).1.068 (0.757 to 1.337)	256.7 (189.1 to 512.7).620 (373.1 to 905.4)	0.19705	0.722 (0.519 to 1.013).0.748 (0.68 to 0.924)	301.7 (264.5 to 371.3).582 (417.7 to 697.8)	0.006585
ENSG00000009950	MLXIPL	A_24_P209389	0.943 (0.856 to 1.05)	2658 (2053 to 3728)	0.095	1.011 (0.956 to 1.076)	3031 (2313 to 4450)	0.768	1.027 (0.941 to 1.169)	2851 (1870 to 4117)	0.522	1.358 (1.269 to 1.446)	4842 (3877 to 6855)	2.72e-06
ENSG00000009954	BAZ1B	A_23_P215449	0.966 (0.861 to 1.025)	2651 (1402 to 5534)	0.284	1.335 (1.236 to 1.48)	3586 (1391 to 6223)	2.16e-07	1.231 (1.129 to 1.292)	3249 (2032 to 5755)	6.6e-06	0.995 (0.878 to 1.09)	3369 (2326 to 4030)	0.936
ENSG00000010017	RANBP9	A_23_P424513, A_23_P59268, A_24_P226355	0.965 (0.934 to 0.986).1.054 (0.985 to 1.213).1.066 (0.917 to 1.349)	234.9 (171.9 to 358.1).3732 (2177 to 6887).959.2 (545.6 to 1706)	0.191	0.949 (0.922 to 0.978).1.01 (0.947 to 1.071).1.041 (0.958 to 1.126)	221.6 (110.9 to 339.7).3962 (1511 to 7072).892.2 (376.7 to 1503)	0.442333	0.933 (0.844 to 1.114).0.933 (0.878 to 1).1.003 (0.954 to 1.073)	209.1 (133.1 to 297).3728 (2406 to 6875).785.1 (539.1 to 1245)	0.4127	0.856 (0.598 to 1.011).1.05 (0.939 to 1.271).1.073 (1.011 to 1.177)	1183 (868.1 to 1412).282 (185.4 to 358.6).5420 (5210 to 5835)	0.241567
ENSG00000010072	SPRTN	A_23_P433791, A_24_P15292	1.082 (0.926 to 1.199).1.19 (0.984 to 1.41)	77.38 (42.65 to 143.3).92.8 (46.75 to 161.9)	0.14615	0.946 (0.808 to 1.082).0.947 (0.836 to 1.087)	73.19 (30.16 to 128.2).83.06 (36 to 173.2)	0.476	0.914 (0.589 to 1.213).1.074 (0.734 to 1.369)	70.31 (37.13 to 130.2).77.55 (49.53 to 121.6)	0.4645	0.748 (0.535 to 0.913).0.858 (0.769 to 1.057)	111.9 (91.27 to 165.5).89.4 (72.02 to 104.6)	0.0382
ENSG00000010165	METTL13	A_23_P201672, A_23_P201676	1.052 (1.012 to 1.089).1.127 (1.061 to 1.167)	1049 (703 to 1720).8638 (5581 to 14356)	0.043575	0.987 (0.885 to 1.091).1.015 (0.902 to 1.179)	967.2 (438.6 to 1613).9559 (3901 to 18680)	0.75	0.958 (0.825 to 1.086).0.993 (0.94 to 1.046)	889.5 (487.2 to 1676).8331 (5220 to 15561)	0.599	0.678 (0.597 to 0.756).0.746 (0.67 to 0.833)	7898 (6820 to 9049).823 (652.2 to 1000)	0.000591
ENSG00000010219	DYRK4	A_23_P87902	0.932 (0.884 to 0.997)	1466 (808.9 to 2745)	0.0295	1.053 (0.966 to 1.16)	1752 (534.2 to 3365)	0.198	1.071 (1.032 to 1.13)	1623 (913.9 to 3095)	0.0518	1.286 (1.168 to 1.369)	2607 (2498 to 2938)	5.21e-05
ENSG00000010244	ZNF207	A_23_P118690, A_24_P116766	0.997 (0.832 to 1.156).1.027 (0.941 to 1.097)	252.3 (88.45 to 448.4).3000 (1693 to 5676)	0.672	0.924 (0.583 to 1.235).0.981 (0.904 to 1.036)	232.7 (90.57 to 314.2).2872 (1642 to 4964)	0.555	0.918 (0.831 to 1.001).0.974 (0.668 to 1.515)	232.6 (132 to 322.4).2614 (1848 to 4498)	0.4344	1.05 (0.874 to 1.384).1.227 (1.048 to 1.526)	3830 (3094 to 4756).421.5 (264.7 to 607.9)	0.27006
ENSG00000010256	UQCRC1	A_23_P132675	1.011 (0.927 to 1.069)	8563 (4439 to 17528)	0.693	1.056 (0.961 to 1.227)	8921 (3939 to 15469)	0.23	1.049 (0.86 to 1.154)	8913 (5174 to 16804)	0.329	0.812 (0.776 to 0.847)	8433 (6310 to 9895)	0.00494
ENSG00000010270	STARD3NL	A_23_P70938	1.035 (1.019 to 1.066)	5169 (2681 to 8964)	0.215	0.888 (0.878 to 0.894)	4873 (2470 to 9027)	0.00921	1.034 (0.962 to 1.106)	5264 (3581 to 10103)	0.371	1.281 (1.131 to 1.532)	8471 (6014 to 10218)	0.000545
ENSG00000010292	NCAPD2	A_23_P25293	1.203 (1.158 to 1.296)	6852 (3560 to 13881)	0.000149	0.889 (0.703 to 1.071)	4941 (2234 to 8548)	0.0976	0.99 (0.904 to 1.064)	5339 (3370 to 10042)	0.794	0.95 (0.816 to 1.084)	6520 (4583 to 8093)	0.439
ENSG00000010295	IFFO1	A_23_P87742	0.991 (0.94 to 1.015)	4711 (2580 to 9370)	0.748	0.878 (0.778 to 1.097)	4198 (1684 to 6871)	0.0541	1.413 (1.116 to 1.6)	6537 (4096 to 9755)	1.26e-05	3.284 (3.06 to 3.576)	19963 (16380 to 23422)	3.7e-18
ENSG00000010310	GIPR	A_23_P119395, A_24_P373768	0.96 (0.787 to 1.262).0.973 (0.777 to 1.134)	1033 (750.5 to 1574).751.1 (425 to 1179)	0.5485	0.998 (0.94 to 1.049).1.095 (0.914 to 1.255)	1350 (795.7 to 2441).842.9 (318.2 to 1541)	0.5216	0.985 (0.745 to 1.17).1.148 (1.083 to 1.253)	1312 (844 to 2136).742.5 (433.3 to 1626)	0.406645	0.943 (0.851 to 1.171).1.135 (0.978 to 1.27)	1144 (883.4 to 1623).1509 (1236 to 1874)	0.21345
ENSG00000010322	NISCH	A_23_P41021, A_24_P405621, A_24_P925709	0.878 (0.765 to 1.066).0.968 (0.891 to 1.017).1.051 (0.997 to 1.119)	1401 (771.3 to 2750).237 (166.8 to 414.5).2500 (1368 to 4956)	0.123633	0.942 (0.779 to 1.141).1.031 (0.811 to 1.375).1.039 (0.798 to 1.497)	1356 (520.9 to 2204).242.1 (131.7 to 337.6).2740 (1130 to 5114)	0.558667	0.884 (0.677 to 1.125).0.926 (0.722 to 1.215).1.001 (0.769 to 1.331)	1155 (640.4 to 2107).228 (157.7 to 310.5).2217 (1289 to 3903)	0.473667	1.042 (0.953 to 1.199).1.179 (1.01 to 1.337).1.213 (0.986 to 1.497)	1967 (1249 to 2773).386.6 (341.5 to 446.6).3753 (2515 to 4804)	0.1722
ENSG00000010361	FUZ	A_23_P373568, A_24_P121891	0.983 (0.927 to 1.08).1.018 (0.959 to 1.12)	254.8 (121.2 to 494.1).793.3 (355.6 to 1626)	0.607	0.99 (0.866 to 1.085).1.001 (0.972 to 1.068)	251.5 (107.7 to 466.4).848.7 (284 to 1837)	0.9085	0.99 (0.909 to 1.1).1.014 (0.907 to 1.068)	254.6 (125.8 to 542.6).772.5 (349.3 to 1772)	0.775	0.689 (0.619 to 0.784).0.762 (0.656 to 0.816)	258.5 (160.1 to 415.9).627.1 (422.2 to 928.2)	0.0010375
ENSG00000010404	IDS	A_23_P217475, A_23_P400847	0.804 (0.692 to 0.886).0.859 (0.827 to 0.904)	224.1 (95.41 to 472.8).752.6 (233.2 to 1536)	0.000474	1.174 (0.999 to 1.475).1.25 (1.009 to 1.492)	1080 (446.3 to 2250).346.6 (140 to 671.6)	0.008828	1.041 (0.732 to 1.297).1.14 (0.922 to 1.388)	298.8 (144.4 to 606.6).920.8 (433.1 to 2307)	0.33245	0.712 (0.585 to 0.847).1.365 (1.239 to 1.461)	484.1 (359.4 to 671.9).785.4 (452.8 to 1348)	0.000777665
ENSG00000010539	ZNF200	A_23_P152356	1.033 (0.998 to 1.074)	963.1 (571 to 1799)	0.28	0.967 (0.859 to 1.042)	889.1 (535 to 1363)	0.429	0.982 (0.952 to 1.015)	905.9 (645.1 to 1461)	0.609	1.087 (0.973 to 1.212)	1316 (1075 to 1679)	0.145
ENSG00000010610	CD4	A_24_P295999	0.942 (0.819 to 1.087)	15002 (8127 to 25141)	0.154	0.957 (0.845 to 1.142)	16394 (11746 to 27226)	0.383	1.119 (0.998 to 1.202)	18624 (11694 to 33804)	0.00889	1.475 (1.365 to 1.57)	30847 (25598 to 37201)	7.28e-08
ENSG00000010626	LRRC23	A_23_P36689	0.988 (0.894 to 1.108)	215.4 (144.6 to 354)	0.744	0.902 (0.751 to 1.148)	206.2 (110.9 to 404.4)	0.161	1.122 (0.948 to 1.278)	258.1 (154.9 to 441.4)	0.0347	0.825 (0.706 to 1.051)	240.5 (201.5 to 317.5)	0.0268
ENSG00000010671	BTK	A_23_P137139	1.023 (0.896 to 1.146)	1661 (906.9 to 3153)	0.539	0.789 (0.666 to 0.877)	1246 (503.9 to 1990)	0.000441	1.232 (1.053 to 1.557)	1919 (1058 to 3095)	0.00312	1.666 (1.376 to 2.327)	3537 (2518 to 5252)	6.09e-05
ENSG00000010803	SCMH1	A_23_P12477	1.118 (1.066 to 1.158)	668.3 (342.9 to 1290)	0.00881	0.842 (0.67 to 1.056)	479 (184.9 to 807.6)	0.0222	0.962 (0.848 to 1.091)	540 (285.4 to 937.6)	0.388	0.792 (0.702 to 0.983)	584.1 (381.3 to 726.1)	0.00859
ENSG00000010810	FYN	A_23_P502142	0.976 (0.734 to 1.192)	250.6 (63.93 to 675)	0.604	1.181 (0.923 to 1.57)	321.9 (67.44 to 943.4)	0.00213	0.713 (0.577 to 0.848)	154.6 (53.72 to 454.8)	9.86e-05	0.989 (0.656 to 1.756)	320.5 (115.7 to 866.2)	0.905
ENSG00000010818	HIVEP2	A_23_P214766	0.687 (0.657 to 0.755)	331.2 (229.7 to 530.1)	3.8e-08	1.874 (1.488 to 2.972)	952.6 (621.2 to 1508)	5.23e-05	1.491 (1.245 to 1.73)	785.2 (667.2 to 1131)	2.94e-06	3.791 (2.477 to 4.912)	2847 (2089 to 4077)	6.82e-08
ENSG00000010932	FMO1	A_23_P149613	0.818 (0.492 to 1.009)	50.59 (34.26 to 92.98)	0.108	0.855 (0.671 to 1.193)	59.32 (29.68 to 131)	0.144	1.051 (0.664 to 1.929)	57.77 (24.44 to 108.5)	0.734	1.142 (0.846 to 1.481)	101.9 (58.15 to 167.6)	0.166
ENSG00000011007	TCEB3	A_23_P74097, A_24_P122403	0.982 (0.906 to 1.074).1.036 (0.996 to 1.124)	1221 (808.3 to 1875).668.4 (350.8 to 1146)	0.3875	0.935 (0.856 to 1.02).1.069 (0.916 to 1.34)	1188 (604 to 1943).808.4 (365.5 to 1413)	0.203	0.833 (0.788 to 0.878).0.983 (0.811 to 1.19)	666.2 (384.2 to 1297).987.1 (647 to 1757)	0.388965	0.563 (0.508 to 0.605).1.12 (0.88 to 1.559)	1033 (699.3 to 1192).911.1 (698.3 to 1162)	0.110006
ENSG00000011009	LYPLA2	A_24_P276490	0.978 (0.866 to 1.234)	68.29 (31.99 to 148.5)	0.806	0.888 (0.736 to 1.154)	62.77 (22.91 to 124.3)	0.25	0.944 (0.732 to 1.209)	64.39 (32.76 to 127.3)	0.59	0.939 (0.709 to 1.187)	92.33 (71.96 to 112.4)	0.491
ENSG00000011021	CLCN6	A_24_P302374	0.948 (0.845 to 1.052)	747.5 (385.1 to 1588)	0.15	0.823 (0.554 to 1.136)	595.3 (234.8 to 970.8)	0.073	1.084 (0.773 to 1.446)	797 (423.1 to 1288)	0.366	2 (1.566 to 2.336)	1864 (1495 to 2206)	6.99e-08
ENSG00000011028	MRC2	A_23_P49627	0.959 (0.788 to 1.164)	85.98 (52.4 to 164.1)	0.551	0.85 (0.618 to 1.203)	79.72 (38.01 to 125)	0.12	1.194 (1.001 to 1.416)	112.1 (69.51 to 159.8)	0.00913	1.177 (0.679 to 1.821)	166.8 (83.09 to 237.5)	0.199
ENSG00000011052	NME2	A_23_P141405, A_23_P398005	1.015 (0.948 to 1.103).1.025 (0.978 to 1.064)	120130 (69345 to 228734).87456 (56288 to 165531)	0.4785	1.059 (0.97 to 1.15).1.079 (0.978 to 1.18)	103766 (63214 to 187116).146204 (68700 to 294607)	0.1203	0.923 (0.846 to 0.967).0.949 (0.907 to 1.013)	125905 (68277 to 266626).94383 (61035 to 163778)	0.11885	0.497 (0.43 to 0.576).0.524 (0.434 to 0.577)	113398 (85708 to 149176).82934 (68251 to 93233)	9.385e-06
ENSG00000011114	BTBD7	A_23_P88184, A_24_P210513, A_24_P721898	0.973 (0.842 to 1.065).1.023 (0.975 to 1.089).1.029 (0.867 to 1.158)	175.8 (111.9 to 272.5).1592 (852.2 to 3096).74.9 (44.56 to 148.4)	0.522667	0.987 (0.894 to 1.057).1.014 (0.9 to 1.153).1.061 (0.975 to 1.141)	1598 (591 to 3278).207.5 (138.3 to 261).75.66 (25.56 to 119.7)	0.591333	0.789 (0.692 to 0.928).0.833 (0.699 to 1.01).1.017 (0.808 to 1.145)	153.1 (105.9 to 180).1441 (990.6 to 2522).58.01 (35.72 to 94.7)	0.291307	0.556 (0.456 to 0.677).0.647 (0.562 to 0.699).1.133 (1.049 to 1.21)	161.2 (117.5 to 220.7).2100 (1711 to 2467).74.24 (44.88 to 88.6)	0.00732917
ENSG00000011132	APBA3	A_23_P67555	1.274 (0.903 to 5.281)	550.8 (162 to 2113)	0.262	1.141 (0.952 to 1.387)	360 (163.2 to 675)	0.0384	1.13 (1.011 to 1.24)	315.1 (186.3 to 487.6)	0.0071	1.045 (0.962 to 1.113)	407.3 (338.8 to 471.8)	0.42
ENSG00000011143	MKS1	A_24_P330796	1.109 (0.884 to 1.483)	127 (61.02 to 246.3)	0.193	1.008 (0.808 to 1.278)	128.7 (50.39 to 264.2)	0.913	1.054 (0.783 to 1.39)	112.5 (52.84 to 220)	0.538	0.687 (0.505 to 0.915)	99.64 (68.92 to 138.6)	0.00313
ENSG00000011198	ABHD5	A_23_P250294	0.995 (0.923 to 1.067)	514.3 (318.5 to 785.1)	0.863	0.996 (0.898 to 1.192)	574 (290.9 to 990.4)	0.932	1 (0.903 to 1.141)	526.4 (407.8 to 814.1)	0.997	0.714 (0.621 to 0.761)	508.2 (412.1 to 586.4)	0.000456
ENSG00000011243	AKAP8L	A_23_P153767	1 (0.928 to 1.145)	1398 (791.7 to 2915)	0.998	0.838 (0.7 to 1.131)	1124 (560.2 to 1752)	0.0338	1.008 (0.893 to 1.276)	1374 (782.4 to 2352)	0.887	1.207 (0.993 to 1.369)	2199 (1620 to 3088)	0.00708
ENSG00000011258	MBTD1	A_32_P58937	1.117 (0.996 to 1.205)	943.7 (499.6 to 1736)	0.00298	0.809 (0.702 to 0.997)	702.9 (352.1 to 1155)	0.00261	0.923 (0.796 to 1.101)	740.2 (510.7 to 1229)	0.16	0.906 (0.832 to 1.042)	970.6 (845 to 1053)	0.131
ENSG00000011260	UTP18	A_23_P130020	1.193 (1.11 to 1.31)	5061 (3245 to 8535)	0.000113	0.869 (0.675 to 0.981)	4262 (2171 to 7795)	0.0323	0.969 (0.891 to 1.084)	4288 (2778 to 7851)	0.438	0.691 (0.597 to 0.871)	3927 (3256 to 4874)	0.000551
ENSG00000011275	RNF216	A_23_P42724, A_24_P235131	1.085 (0.998 to 1.204).1.139 (1.027 to 1.289)	103.7 (49.82 to 175.3).545.4 (279.7 to 997.3)	0.0277	0.908 (0.827 to 0.977).1.11 (0.912 to 1.502)	465 (189.4 to 901.8).99.56 (39.97 to 130.4)	0.1093	0.83 (0.664 to 1.293).0.854 (0.775 to 1.002)	407.8 (247 to 781.4).71.98 (37.68 to 104.6)	0.052595	0.774 (0.566 to 1.049).0.993 (0.798 to 1.142)	106.3 (75.21 to 164).696.5 (516.4 to 1020)	0.4695
ENSG00000011295	TTC19	A_23_P50008, A_24_P126393	1.036 (0.967 to 1.086).1.19 (1.051 to 1.303)	166.2 (113.3 to 255).3450 (2003 to 6440)	0.105694	0.952 (0.868 to 1.11).0.962 (0.875 to 1.031)	152.3 (79.9 to 251).3371 (1312 to 6497)	0.354	0.948 (0.852 to 1.037).0.974 (0.851 to 1.193)	136.8 (82.12 to 185.2).3033 (1899 to 5505)	0.444	0.798 (0.635 to 0.92).0.96 (0.783 to 1.136)	156.9 (116.3 to 197.3).3948 (3274 to 4598)	0.2798
ENSG00000011304	PTBP1	A_24_P14367	1.037 (0.964 to 1.148)	1005 (584.7 to 1721)	0.224	0.982 (0.934 to 1.012)	1008 (464.7 to 1810)	0.637	0.854 (0.768 to 0.929)	779.6 (551.9 to 1163)	0.00264	0.524 (0.389 to 0.678)	659 (487.9 to 800.2)	6.26e-05
ENSG00000011376	LARS2	A_23_P212397	1.072 (1.004 to 1.13)	3058 (1635 to 5856)	0.0363	1.011 (0.968 to 1.104)	2942 (1097 to 5321)	0.782	1.006 (0.938 to 1.094)	2751 (1657 to 5068)	0.881	0.792 (0.72 to 0.907)	2783 (1995 to 3544)	0.00436
ENSG00000011422	PLAUR	A_23_P16469	0.99 (0.887 to 1.066)	1139 (402.1 to 2547)	0.759	0.999 (0.843 to 1.192)	1220 (326.9 to 2829)	0.983	0.731 (0.634 to 0.821)	768.6 (353.9 to 1834)	4.62e-05	0.829 (0.618 to 1.255)	1165 (539.9 to 2131)	0.108
ENSG00000011426	ANLN	A_23_P356684	0.976 (0.915 to 1.022)	1053 (512.8 to 1944)	0.395	0.944 (0.785 to 1.036)	993 (398.6 to 1613)	0.271	1.162 (0.985 to 1.432)	1142 (726 to 1717)	0.0131	1.21 (1.022 to 1.435)	1630 (1284 to 2019)	0.00633
ENSG00000011451	WIZ	A_23_P405531	1.065 (1.041 to 1.104)	4512 (2435 to 8989)	0.0406	0.997 (0.916 to 1.173)	4178 (1284 to 7786)	0.955	0.932 (0.744 to 1.136)	3592 (2123 to 6400)	0.284	0.819 (0.633 to 0.953)	4162 (2650 to 5578)	0.0336
ENSG00000011454	RABGAP1	A_24_P252575	1.071 (0.946 to 1.162)	339.9 (203.9 to 590.9)	0.0531	0.909 (0.719 to 1.09)	295.6 (137.2 to 489.2)	0.161	0.872 (0.622 to 1.086)	249 (141.2 to 379.7)	0.141	0.932 (0.732 to 1.062)	391.8 (323.2 to 438.2)	0.357
ENSG00000011485	PPP5C	A_23_P153583	1.132 (0.945 to 1.279)	190.9 (87.55 to 355.2)	0.0245	0.989 (0.769 to 1.206)	165.9 (66.67 to 315.6)	0.875	0.913 (0.768 to 1.004)	142.3 (80.5 to 247.9)	0.161	0.686 (0.554 to 0.836)	154.2 (102.2 to 221.3)	0.00117
ENSG00000011523	CEP68	A_23_P210323, A_24_P944049, A_24_P94419, A_32_P164061	0.876 (0.733 to 1.009).1.297 (1.21 to 1.439).1.315 (1.095 to 1.475).1.511 (1.435 to 1.627)	110 (55.6 to 212.8).207.6 (121.2 to 419.3).684.6 (451.9 to 1119).98.15 (50.62 to 191.5)	0.0172139	0.777 (0.66 to 0.914).0.792 (0.685 to 0.895).0.841 (0.691 to 0.999).1.096 (0.821 to 1.348)	117.1 (41.29 to 229.8).118.6 (65.68 to 178.5).404.6 (195.6 to 597.6).64.71 (22.6 to 123.7)	0.075805	0.882 (0.745 to 1.07).0.912 (0.707 to 1.122).0.965 (0.832 to 1.234).1.007 (0.731 to 1.435)	102.1 (51.56 to 196.4).150 (107.7 to 204.3).407.1 (284.3 to 638.8).70.84 (36.6 to 128.3)	0.478125	0.659 (0.575 to 0.73).0.668 (0.526 to 0.798).0.7 (0.576 to 0.916).0.931 (0.739 to 1.139)	135.1 (113.2 to 153.5).149.3 (123.3 to 175.1).463.8 (310.6 to 627.1).75.25 (46.19 to 114.3)	0.094404
ENSG00000011600	TYROBP	A_23_P27994	0.843 (0.787 to 0.896)	11432 (8368 to 16833)	0.000158	1.052 (1.019 to 1.102)	15953 (8456 to 24319)	0.157	1.535 (1.369 to 1.851)	24718 (15965 to 47954)	9.34e-07	4.069 (3.129 to 4.937)	100236 (76232 to 120536)	1.95e-10
ENSG00000011638	TMEM159	A_23_P206899, A_23_P406131	0.935 (0.807 to 1.173).0.978 (0.764 to 1.108)	1299 (709.7 to 2362).97.11 (41.13 to 190.4)	0.5385	0.639 (0.474 to 0.996).0.732 (0.563 to 0.847)	57.61 (26.33 to 99.86).976.5 (335.7 to 1771)	0.001421	1.104 (0.982 to 1.206).1.134 (0.962 to 1.37)	100.1 (53.63 to 206.1).1511 (783.3 to 3506)	0.0635	1.469 (1.088 to 1.894).1.492 (0.939 to 2.037)	180.8 (154.1 to 188.6).2597 (2064 to 2793)	0.0016395
ENSG00000012048	BRCA1	A_23_P207400, A_32_P171695	1.011 (0.853 to 1.179).1.021 (0.788 to 1.299)	224.1 (135.2 to 386.1).3343 (1933 to 6689)	0.6775	0.993 (0.826 to 1.124).1.088 (0.75 to 1.272)	304.2 (150.1 to 524.6).3775 (1842 to 7246)	0.46775	1.082 (0.813 to 1.389).1.099 (1.018 to 1.195)	280.4 (167.7 to 584.8).3569 (2411 to 7437)	0.06505	0.726 (0.473 to 0.999).0.82 (0.548 to 1.038)	330.8 (290.9 to 403.7).3114 (1834 to 4433)	0.03829
ENSG00000012061	ERCC1	A_23_P107701	0.997 (0.959 to 1.034)	3836 (2321 to 6690)	0.911	1.04 (0.991 to 1.097)	4259 (1991 to 7249)	0.29	1.029 (0.98 to 1.102)	4093 (2671 to 7739)	0.436	0.946 (0.883 to 1.071)	4583 (3996 to 5625)	0.371
ENSG00000012171	SEMA3B	A_23_P132718, A_24_P294419	0.84 (0.432 to 1.073).0.911 (0.863 to 0.982)	112 (58.27 to 209).49.48 (29.14 to 75.34)	0.1373	1.029 (0.927 to 1.099).1.058 (0.897 to 1.298)	139 (43.1 to 343.8).61.66 (35.38 to 122.4)	0.5495	0.988 (0.877 to 1.313).1.089 (0.886 to 1.526)	167.1 (58.37 to 390.3).61.39 (29.2 to 117.3)	0.6025	1.209 (1.001 to 1.37).1.549 (1.111 to 2.18)	299.1 (214.9 to 421.2).94.71 (71.61 to 123.1)	0.006495
ENSG00000012174	MBTPS2	A_23_P114095	0.998 (0.884 to 1.108)	59.53 (40.79 to 88.78)	0.983	1.059 (0.881 to 1.26)	66.47 (38.89 to 103.5)	0.461	1.133 (0.886 to 1.335)	62.17 (43.76 to 85.92)	0.158	0.829 (0.647 to 0.93)	70.64 (51.94 to 80.05)	0.0551
ENSG00000012211	PRICKLE3	A_23_P348684	1.041 (0.847 to 1.235)	87.3 (46.24 to 184.2)	0.593	0.937 (0.815 to 1.08)	85.79 (34.47 to 164.8)	0.376	1.025 (0.815 to 1.385)	86.57 (46.41 to 159.9)	0.77	1.076 (0.873 to 1.273)	129.4 (108.1 to 157.2)	0.326
ENSG00000012232	EXTL3	A_23_P384405	0.953 (0.881 to 1.073)	589 (267.7 to 1325)	0.175	1.058 (0.991 to 1.145)	649 (248.8 to 1261)	0.158	0.976 (0.881 to 1.04)	580.5 (303.1 to 1199)	0.544	1.127 (1.001 to 1.326)	858.1 (742.1 to 1046)	0.0543
ENSG00000012660	ELOVL5	A_23_P156497, A_23_P431521	0.958 (0.814 to 1.1).1.004 (0.922 to 1.097)	1442 (745 to 2535).69.88 (38.82 to 133.6)	0.7405	0.846 (0.609 to 1.042).0.889 (0.787 to 0.989)	1412 (658.1 to 2714).66.51 (23.34 to 130.4)	0.06845	1.046 (0.858 to 1.311).1.094 (0.871 to 1.298)	1441 (1087 to 2326).82.26 (38.91 to 190.9)	0.3815	0.858 (0.692 to 0.974).1.181 (1.027 to 1.299)	2056 (1782 to 2504).97.84 (80 to 138.1)	0.04362
ENSG00000012779	ALOX5	A_23_P104464	0.797 (0.738 to 0.866)	645.7 (391.4 to 867.2)	2.84e-05	1.342 (0.947 to 1.843)	1306 (663.9 to 2286)	0.00622	2.142 (1.823 to 2.555)	1891 (1394 to 2280)	4.47e-10	7.383 (5.945 to 10.34)	14501 (11105 to 19541)	1.25e-10
ENSG00000012817	KDM5D	A_23_P137238	0.972 (0.815 to 1.242)	56.47 (34.57 to 105)	0.762	1.044 (0.723 to 2.321)	60.5 (34.44 to 130.5)	0.775	1.022 (0.781 to 1.217)	58.94 (23.51 to 107.2)	0.837	0.887 (0.729 to 1.205)	81 (39.97 to 138.7)	0.244
ENSG00000012822	CALCOCO1	A_23_P98995	1.03 (0.921 to 1.466)	64.11 (34.56 to 118.1)	0.753	0.805 (0.513 to 0.944)	53.47 (27.43 to 76.75)	0.06	1.162 (0.895 to 1.459)	61.44 (42.47 to 87.83)	0.135	1.993 (1.234 to 3.456)	182.7 (136.6 to 256)	0.000194
ENSG00000012963	UBR7	A_23_P205393, A_24_P159094	0.998 (0.957 to 1.018).1.001 (0.945 to 1.039)	2368 (1340 to 4695).2618 (1456 to 5084)	0.949	0.975 (0.943 to 1.057).1.226 (1.113 to 1.36)	2709 (996.5 to 5219).3029 (1333 to 5974)	0.259515	1.098 (1.063 to 1.127).1.107 (1.017 to 1.193)	2497 (1750 to 4131).2888 (1625 to 6036)	0.009245	0.633 (0.581 to 0.731).0.864 (0.744 to 0.991)	2116 (1800 to 2580).2540 (2257 to 2909)	0.0222885
ENSG00000012983	MAP4K5	A_23_P205646, A_23_P350491, A_24_P16997, A_32_P203219	0.983 (0.913 to 1.093).0.998 (0.907 to 1.052).1.06 (0.884 to 1.204).1.132 (0.867 to 1.37)	126.7 (66.58 to 244.8).254.1 (104.7 to 449.7).511.9 (315.4 to 909.4).827.7 (491.1 to 1515)	0.4767	0.886 (0.59 to 1.222).1.011 (0.865 to 1.145).1.063 (0.871 to 1.26).1.285 (0.818 to 1.635)	117.6 (47.52 to 206.7).331.4 (132.8 to 452.1).406.1 (195.6 to 521.5).875.5 (424.7 to 1289)	0.357575	0.819 (0.608 to 1.043).0.959 (0.677 to 1.265).0.996 (0.815 to 1.28).1.015 (0.845 to 1.424)	119.4 (70.72 to 216).241.6 (123.4 to 351.7).407.7 (216.4 to 558.8).759.4 (580.5 to 1074)	0.6105	0.752 (0.474 to 1.14).0.797 (0.679 to 0.924).0.864 (0.645 to 1.134).0.927 (0.71 to 1.131)	135.2 (98.43 to 207.6).1024 (808.1 to 1268).323.7 (173.9 to 536).534.7 (325.8 to 858.2)	0.138875
ENSG00000013275	PSMC4	A_24_P91310	1.004 (0.941 to 1.042)	2230 (1189 to 4234)	0.886	1.084 (1.005 to 1.154)	2475 (911.7 to 4550)	0.0454	0.849 (0.808 to 0.874)	1782 (971.5 to 3144)	0.00197	0.708 (0.623 to 0.896)	1886 (1254 to 2556)	0.00106
ENSG00000013288	MAN2B2	A_23_P250379, A_23_P250380	1.006 (0.975 to 1.044).1.047 (0.962 to 1.179)	1789 (1233 to 2823).662.1 (428.5 to 1187)	0.494	0.921 (0.855 to 1.043).0.923 (0.832 to 0.981)	1782 (835.1 to 2791).538.1 (371 to 809.6)	0.0805	1.097 (1.03 to 1.253).1.125 (1.017 to 1.239)	2007 (1503 to 3198).683.8 (562.8 to 843.9)	0.01501	1.702 (1.42 to 2.287).1.927 (1.798 to 2.172)	1642 (1349 to 1842).4757 (4121 to 5325)	2.44502e-06
ENSG00000013297	CLDN11	A_23_P29800, A_23_P405088	0.915 (0.866 to 0.945).0.996 (0.897 to 1.175)	157.6 (84.78 to 300.5).1155 (530.2 to 2219)	0.47485	0.931 (0.644 to 1.131).1.277 (1.025 to 1.472)	183.5 (100.8 to 375.2).1832 (894.8 to 3768)	0.183577	0.976 (0.909 to 1.124).1.018 (0.922 to 1.158)	177.2 (69.88 to 367.1).1199 (504.5 to 2603)	0.661	0.533 (0.504 to 0.56).1.062 (0.886 to 1.324)	266.5 (108.5 to 412.7).843.6 (549.2 to 1096)	0.212503
ENSG00000013306	SLC25A39	A_23_P100764	1.023 (0.983 to 1.094)	4166 (1865 to 7307)	0.454	1.04 (0.954 to 1.173)	4165 (1559 to 6805)	0.37	0.938 (0.834 to 0.999)	3780 (1939 to 6861)	0.15	0.718 (0.686 to 0.748)	3809 (2758 to 4716)	0.000265
ENSG00000013364	MVP	A_23_P88819	0.947 (0.858 to 1.048)	514.9 (351.2 to 780.6)	0.114	0.993 (0.908 to 1.086)	633.4 (400.1 to 1104)	0.867	1.253 (1.193 to 1.381)	785.6 (528.6 to 1385)	2.49e-06	4.65 (2.936 to 7.4)	3890 (2312 to 5319)	6.42e-08
ENSG00000013374	NUB1	A_23_P215154	1.005 (0.882 to 1.101)	667.7 (445.5 to 1098)	0.9	0.856 (0.776 to 0.925)	628 (356 to 959.2)	0.00393	1.133 (1.069 to 1.24)	757.2 (517.7 to 1256)	0.00219	1.315 (1.116 to 1.456)	1226 (1030 to 1469)	6.5e-05
ENSG00000013375	PGM3	A_23_P19592, A_24_P393658, A_24_P944723	1.056 (1.001 to 1.128).1.155 (1.098 to 1.234).1.156 (0.962 to 1.26)	160.5 (82.74 to 280.4).1368 (805.7 to 2381).503.1 (225.4 to 1017)	0.04166	1.207 (1.063 to 1.474).1.278 (1.108 to 1.531).1.359 (1.041 to 1.877)	193.7 (76.29 to 325.1).1488 (703.6 to 2442).672.3 (235.3 to 1462)	0.0012804	0.683 (0.465 to 0.956).0.821 (0.696 to 0.946).0.995 (0.826 to 1.237)	103.2 (56.04 to 180.4).430.6 (245 to 860.7).911.9 (648.4 to 1477)	0.313233	0.478 (0.404 to 0.69).0.552 (0.398 to 0.722).0.625 (0.41 to 0.894)	108.7 (72.26 to 154.1).351.4 (308.5 to 383.9).727 (531.1 to 883.1)	0.0008181
ENSG00000013392	RWDD2A	A_23_P255076	1.28 (1.188 to 1.352)	108.1 (57.23 to 197.8)	0.000168	1.68 (1.527 to 2.104)	147.1 (69.62 to 256.5)	7.57e-08	0.87 (0.581 to 1.254)	74.89 (51.51 to 150.9)	0.194	0.503 (0.387 to 0.629)	68.32 (56.53 to 86.6)	0.000166
ENSG00000013441	CLK1	A_23_P16817, A_24_P257151	0.753 (0.692 to 0.881).0.847 (0.795 to 0.965)	1324 (482.7 to 2469).234.8 (87.44 to 417.6)	0.0001498	1.321 (0.947 to 2.137).1.346 (1.005 to 2.023)	2038 (890.1 to 3398).380.9 (165.1 to 649.9)	0.0103	1.253 (0.966 to 1.775).1.316 (0.98 to 1.943)	1807 (1087 to 3035).338.6 (198 to 542.2)	0.01585	1.73 (1.176 to 2.987).1.87 (1.347 to 3.177)	3564 (2691 to 4083).641.3 (496.8 to 720.2)	0.0009665
ENSG00000013503	POLR3B	A_23_P87732	1.006 (0.97 to 1.043)	865.5 (470.2 to 1598)	0.812	1.207 (1.098 to 1.36)	1172 (442.4 to 2517)	0.000347	0.787 (0.732 to 0.892)	633.7 (431.6 to 1124)	0.000172	0.363 (0.258 to 0.455)	395 (331.4 to 450.3)	7.09e-06
ENSG00000013523	ANGEL1	A_23_P363406	1.03 (0.899 to 1.322)	134.1 (61.08 to 249.5)	0.614	0.669 (0.562 to 0.881)	87.04 (35.73 to 158.9)	0.000345	1.196 (0.962 to 1.429)	148.5 (78.32 to 308)	0.0164	1.281 (0.994 to 1.76)	219.1 (141.3 to 287.4)	0.0133
ENSG00000013561	RNF14	A_23_P255317, A_24_P132039, A_24_P69150, A_32_P222521	0.997 (0.946 to 1.054).1.007 (0.936 to 1.08).1.01 (0.942 to 1.1).1.013 (0.971 to 1.054)	359.6 (206.1 to 515.3).370 (230.3 to 720.6).401.9 (237.8 to 574.3).87.28 (62.35 to 138.8)	0.77975	0.894 (0.728 to 1.085).0.899 (0.69 to 1.123).0.921 (0.849 to 1.08).0.978 (0.917 to 1.018)	360.1 (165 to 661.6).360.5 (223.7 to 618.3).411.7 (228.1 to 660.1).86.84 (51.97 to 146)	0.2591	1.024 (0.827 to 1.218).1.032 (0.844 to 1.141).1.056 (0.964 to 1.179).1.139 (1.086 to 1.179)	105.4 (75.49 to 152.5).386.5 (288.1 to 599.1).399.6 (260.7 to 635.9).400.5 (315.2 to 608.5)	0.387792	0.941 (0.74 to 1.327).0.975 (0.755 to 1.356).1.078 (0.941 to 1.174).1.121 (0.861 to 1.302)	170.4 (139.6 to 197.5).492.2 (432.2 to 621.3).509.9 (457.2 to 562.5).536.6 (464.6 to 675.1)	0.39975
ENSG00000013563	DNASE1L1	A_23_P85164, A_32_P161166, A_32_P20904, A_32_P66324	0.944 (0.788 to 1.162).0.957 (0.76 to 1.24).0.969 (0.765 to 1.213).1.021 (0.936 to 1.112)	438.1 (253 to 778).636.8 (313.9 to 1235).636.8 (388.4 to 1178).759.2 (434.7 to 1345)	0.47375	0.896 (0.841 to 0.946).1 (0.906 to 1.148).1.016 (0.892 to 1.132).1.031 (0.931 to 1.159)	391.9 (189.9 to 627.9).704.7 (406.9 to 1155).749 (388.7 to 1482).907.3 (482.6 to 1466)	0.54925	1.031 (0.931 to 1.126).1.038 (0.944 to 1.178).1.056 (0.94 to 1.172).1.511 (1.328 to 1.69)	652.1 (416.3 to 1228).775.6 (373 to 1508).807 (348.1 to 1834).936.9 (474 to 1744)	0.26275	1.124 (0.847 to 1.357).1.126 (0.861 to 1.374).1.15 (0.952 to 1.282).2.904 (2.503 to 3.291)	1001 (838.5 to 1125).1241 (994.5 to 1445).1733 (1487 to 2106).986.8 (889.6 to 1074)	0.082775
ENSG00000013573	DDX11	A_23_P203947, A_23_P203949	1.105 (1.07 to 1.15).1.112 (1.032 to 1.158)	1055 (685.5 to 1775).1684 (922.8 to 3056)	0.010445	0.899 (0.786 to 1.156).0.922 (0.781 to 1.101)	1374 (580.1 to 2078).897.4 (411.4 to 1413)	0.1345	0.97 (0.91 to 1.04).1.01 (0.956 to 1.107)	1503 (843.3 to 2836).930.4 (593.7 to 1551)	0.6205	0.835 (0.672 to 1.017).0.846 (0.638 to 1.017)	1080 (717.5 to 1320).1674 (1000 to 2191)	0.05645
ENSG00000013583	HEBP1	A_23_P117082	1.047 (1.021 to 1.071)	10138 (6296 to 18320)	0.145	0.835 (0.797 to 0.886)	8697 (3737 to 16401)	0.00142	1.072 (1.05 to 1.103)	10488 (6570 to 19297)	0.0499	0.756 (0.739 to 0.78)	9211 (6901 to 10507)	0.000736
ENSG00000013725	CD6	A_23_P139162	1.05 (0.872 to 1.265)	63.21 (34.85 to 131.1)	0.598	0.957 (0.727 to 1.194)	61.94 (35.48 to 92.4)	0.635	0.94 (0.882 to 1.137)	67.69 (33.25 to 132.4)	0.487	1.223 (0.769 to 1.867)	129.2 (57.28 to 240.6)	0.118
ENSG00000013810	TACC3	A_23_P212844	1.081 (1.021 to 1.189)	2612 (1426 to 4648)	0.0219	0.853 (0.762 to 0.974)	2123 (919.6 to 3125)	0.00715	1.062 (0.947 to 1.184)	2609 (1357 to 4627)	0.165	1.026 (0.916 to 1.196)	3288 (2376 to 4517)	0.672
ENSG00000014123	UFL1	A_23_P30956	0.961 (0.851 to 1.039)	1483 (995.1 to 2379)	0.243	1.202 (1.117 to 1.25)	2119 (1009 to 3769)	3.86e-05	1.034 (0.925 to 1.186)	1672 (1184 to 3050)	0.457	0.78 (0.577 to 1.133)	1684 (1058 to 2429)	0.0361
ENSG00000014138	POLA2	A_23_P161615	1.077 (1.011 to 1.141)	1421 (786.4 to 2556)	0.0343	0.921 (0.787 to 1.05)	1275 (558.1 to 2395)	0.137	1.059 (0.875 to 1.189)	1371 (803.9 to 2726)	0.3	0.771 (0.573 to 1.014)	1304 (948.8 to 1995)	0.019
ENSG00000014164	ZC3H3	A_23_P9036	1.12 (0.816 to 1.482)	54.76 (30.13 to 98.27)	0.33	0.804 (0.469 to 0.968)	48.98 (14.28 to 87.93)	0.118	1.067 (0.882 to 1.24)	52.94 (29.53 to 94.25)	0.523	0.952 (0.832 to 1.058)	65.32 (48.3 to 72.41)	0.562
ENSG00000014216	CAPN1	A_23_P138835	1.001 (0.896 to 1.147)	533.1 (271 to 1083)	0.969	0.872 (0.754 to 0.995)	477.5 (164.4 to 968.5)	0.0196	1.036 (0.992 to 1.083)	510 (358.1 to 974)	0.327	1.417 (1.183 to 2.047)	969.5 (693.8 to 1576)	0.00136
ENSG00000014257	ACPP	A_24_P46130	0.769 (0.698 to 0.922)	142.5 (105.7 to 182.6)	5.04e-05	1.016 (0.853 to 1.313)	220.5 (138.2 to 304.3)	0.788	1.464 (1.132 to 2.055)	291.2 (204.1 to 420.9)	0.000498	1.74 (1.213 to 2.889)	525.6 (435.8 to 679.9)	0.000695
ENSG00000014641	MDH1	A_23_P101950	1.08 (1.034 to 1.153)	45822 (29416 to 75038)	0.018	0.971 (0.936 to 1.006)	50246 (28928 to 91729)	0.443	0.962 (0.87 to 1.092)	45821 (31844 to 82966)	0.387	0.621 (0.536 to 0.734)	43312 (32150 to 52854)	7.37e-05
ENSG00000014824	SLC30A9	A_23_P30050	1.004 (0.948 to 1.093)	294.1 (173.2 to 495)	0.89	0.963 (0.826 to 1.04)	269.6 (162.8 to 464.7)	0.42	1.064 (0.943 to 1.203)	302.5 (224.6 to 498.9)	0.181	0.974 (0.88 to 1.027)	389.9 (330.1 to 457.5)	0.646
ENSG00000014919	COX15	A_23_P202374, A_24_P115700	1.017 (0.861 to 1.138).1.041 (0.952 to 1.132)	2550 (1411 to 4683).357.2 (141.3 to 736.6)	0.454	1.043 (0.932 to 1.116).1.073 (0.947 to 1.201)	2688 (1003 to 4854).358.6 (135 to 650.5)	0.214	1.091 (0.999 to 1.202).1.144 (0.969 to 1.475)	2668 (1707 to 5422).383.3 (217.1 to 664.2)	0.04175	0.742 (0.667 to 0.884).0.747 (0.605 to 0.933)	2304 (1766 to 2688).326.9 (258.3 to 421.9)	0.00365
ENSG00000015133	CCDC88C	A_23_P379945, A_24_P136094, A_24_P289170, A_24_P911663	1.044 (0.741 to 1.206).1.056 (0.898 to 1.168).1.243 (1.069 to 1.316).1.268 (0.976 to 1.639)	138.2 (80.22 to 211.8).157.2 (66.92 to 316.8).41.83 (20.99 to 71.44).723.3 (407.4 to 1409)	0.187025	0.891 (0.721 to 1.029).0.928 (0.559 to 1.289).0.93 (0.859 to 1.009).1.008 (0.783 to 1.299)	108.5 (48.4 to 144.6).141 (86.83 to 235.6).34.91 (7.063 to 73.03).593.1 (301.7 to 908.3)	0.465475	0.656 (0.434 to 0.804).0.845 (0.71 to 1.003).0.868 (0.564 to 1.106).0.922 (0.851 to 1.071)	102.3 (61.58 to 144.9).129.7 (66.86 to 205.5).22.28 (7.963 to 35.41).596.7 (402.9 to 941.8)	0.102625	0.585 (0.323 to 1.107).0.637 (0.412 to 0.879).0.771 (0.561 to 0.926).1.081 (0.893 to 1.397)	129.9 (88.83 to 176.6).220.2 (129.8 to 342.3).29.28 (16.49 to 52.57).600.1 (400.8 to 842.5)	0.091425
ENSG00000015153	YAF2	A_23_P139825	0.989 (0.892 to 1.131)	345 (226.7 to 540)	0.772	0.902 (0.608 to 1.055)	369.2 (191.6 to 673.2)	0.175	1.095 (1.014 to 1.143)	366.9 (266 to 600.6)	0.0214	0.808 (0.718 to 0.904)	388.6 (305.1 to 465.8)	0.00699
ENSG00000015171	ZMYND11	A_23_P75083, A_24_P201323	1.01 (0.856 to 1.175).1.023 (0.974 to 1.092)	104.7 (56.78 to 181.3).299.1 (183.1 to 493.2)	0.6575	0.972 (0.836 to 1.047).0.99 (0.881 to 1.15)	119 (50.45 to 211.1).308.8 (184.5 to 498.9)	0.735	0.996 (0.866 to 1.182).0.997 (0.792 to 1.247)	102.7 (49.75 to 178.5).301.7 (210.4 to 550.1)	0.9535	0.784 (0.578 to 1.03).1.139 (0.917 to 1.573)	130 (100.6 to 179).467.3 (290 to 589.7)	0.0857
ENSG00000015285	WAS	A_23_P96331	0.948 (0.894 to 1.027)	355.7 (204.1 to 658.8)	0.111	1.032 (0.931 to 1.171)	419.7 (176.3 to 835)	0.477	1.326 (0.97 to 1.705)	527.6 (274.4 to 1079)	0.00113	2.021 (1.629 to 2.557)	1123 (998.4 to 1369)	1.08e-07
ENSG00000015475	BID	A_23_P154929, A_24_P187948	0.989 (0.953 to 1.024).1.032 (0.961 to 1.138)	17422 (10145 to 33145).2976 (1596 to 5894)	0.485	0.978 (0.932 to 1.019).1.115 (0.962 to 1.322)	18358 (8663 to 36224).3864 (1150 to 8697)	0.30085	0.983 (0.931 to 1.053).0.986 (0.936 to 1.022)	17555 (10103 to 36386).2943 (1542 to 6598)	0.6765	0.745 (0.715 to 0.759).0.76 (0.711 to 0.89)	16516 (14543 to 20379).2889 (2334 to 3902)	0.001168
ENSG00000015479	MATR3	A_23_P70047	1.072 (0.991 to 1.226)	2364 (1495 to 3987)	0.0498	1.023 (0.858 to 1.268)	2487 (1194 to 4423)	0.692	0.938 (0.818 to 1.105)	2091 (1499 to 3701)	0.239	0.742 (0.605 to 0.993)	2160 (1716 to 2728)	0.00852
ENSG00000015520	NPC1L1	A_23_P20075	0.803 (0.332 to 1.067)	68.87 (37.18 to 122.2)	0.159	1.091 (0.874 to 1.805)	96.14 (44.93 to 218.3)	0.367	1.078 (0.976 to 1.312)	91.82 (41.06 to 208.7)	0.316	0.932 (0.794 to 1.125)	112.4 (59.43 to 135.6)	0.356
ENSG00000015532	XYLT2	A_23_P15582	1.026 (0.951 to 1.152)	5067 (2427 to 10131)	0.434	0.778 (0.664 to 0.886)	3973 (1132 to 7103)	0.000407	1.115 (1.028 to 1.223)	5476 (2723 to 11563)	0.00943	1.392 (1.324 to 1.443)	8433 (7426 to 9507)	5.04e-07
ENSG00000015568	RGPD5	A_23_P218637, A_24_P85942, A_32_P129660, A_32_P205944, A_32_P89371	0.855 (0.582 to 1.14).0.887 (0.839 to 0.947).0.924 (0.839 to 1.017).0.925 (0.785 to 1.027).0.943 (0.902 to 1.006)	109.2 (48.92 to 213.9).1519 (967.3 to 2292).240.6 (96.89 to 496.9).586.2 (372 to 988.4).68.51 (44.99 to 106.2)	0.137786	1.012 (0.873 to 1.132).1.044 (0.867 to 1.581).1.068 (0.868 to 1.365).1.144 (1.079 to 1.186).1.236 (1.004 to 1.513)	126.6 (43.01 to 216).2380 (974.9 to 4109).301.3 (93.07 to 553).781.3 (388.5 to 1300).79.47 (39.15 to 112.1)	0.369385	0.782 (0.667 to 1.03).1.031 (0.62 to 1.396).1.1 (0.975 to 1.294).1.235 (0.965 to 1.461).1.342 (1.081 to 1.549)	138.2 (82.57 to 222).1385 (885.9 to 2418).329.3 (158 to 624.7).696.2 (486 to 1174).78.29 (51.31 to 99.98)	0.16808	0.782 (0.398 to 1.289).0.968 (0.603 to 1.289).1.234 (1.008 to 1.635).2.749 (1.653 to 4.674).3.866 (2.425 to 6.934)	104.5 (75.56 to 126.8).1070 (770.8 to 1421).1247 (974.5 to 1533).1962 (1138 to 2690).439.5 (341.6 to 585.1)	0.193042
ENSG00000015676	NUDCD3	A_23_P31477	1.109 (1.032 to 1.159)	1065 (625.8 to 2014)	0.00553	0.916 (0.807 to 1.001)	860.8 (459 to 1462)	0.0714	0.95 (0.895 to 1.017)	901.1 (563.4 to 1678)	0.208	0.929 (0.827 to 1.043)	1131 (978.8 to 1278)	0.246
ENSG00000016864	GLT8D1	A_23_P132669	1.082 (1.059 to 1.13)	2930 (1495 to 5477)	0.0158	0.896 (0.879 to 0.927)	2582 (1027 to 4748)	0.0141	0.979 (0.866 to 1.099)	2540 (1436 to 5289)	0.64	1.073 (0.959 to 1.32)	3446 (3106 to 3681)	0.289
ENSG00000017260	ATP2C1	A_23_P143916, A_24_P137372, A_24_P137376	0.985 (0.857 to 1.118).0.998 (0.96 to 1.039).1.001 (0.874 to 1.163)	1449 (878.8 to 2646).2068 (1078 to 4065).5785 (3283 to 10389)	0.867333	1.135 (1.094 to 1.203).1.185 (1.148 to 1.228).1.212 (1.111 to 1.302)	1724 (726.6 to 2881).2501 (814.9 to 4706).7076 (3679 to 12533)	0.0004983	0.958 (0.806 to 1.12).0.958 (0.825 to 1.091).1.039 (0.951 to 1.106)	1338 (887.6 to 1900).1854 (1178 to 3126).5966 (4115 to 10433)	0.369333	0.843 (0.637 to 1.243).0.865 (0.713 to 1.22).0.867 (0.756 to 1.049)	1587 (1043 to 2060).2383 (1570 to 3591).6605 (5447 to 8269)	0.120767
ENSG00000017483	SLC38A5	A_23_P84929	1.124 (1.062 to 1.182)	2505 (1400 to 4596)	0.00726	0.922 (0.889 to 0.969)	2284 (1138 to 4158)	0.0711	0.837 (0.72 to 0.922)	1911 (1101 to 3970)	0.00466	0.358 (0.281 to 0.47)	1004 (733.6 to 1306)	2.74e-05
ENSG00000017621	MAGIX	A_23_P84941	0.838 (0.755 to 0.935)	36.26 (25.2 to 59.8)	0.136	1.141 (0.935 to 1.638)	52.74 (25.78 to 87.84)	0.224	1.127 (0.919 to 1.301)	56.33 (26.54 to 86.49)	0.244	0.98 (0.697 to 1.28)	67.32 (57.49 to 77.45)	0.843
ENSG00000017797	RALBP1	A_23_P153084, A_23_P376599, A_24_P219686	1.04 (1.004 to 1.106).1.207 (1.056 to 1.44).1.269 (1.058 to 1.413)	127.9 (84.8 to 219.3).15025 (7455 to 30292).908.2 (450.1 to 1485)	0.0572878	0.785 (0.727 to 0.829).0.831 (0.705 to 0.914).0.902 (0.652 to 1.135)	12425 (4925 to 23277).658.4 (321.1 to 949).84.95 (41.71 to 126.5)	0.0812933	0.86 (0.788 to 0.944).0.952 (0.818 to 1.188).0.999 (0.895 to 1.099)	14023 (8163 to 27197).644.5 (273.5 to 1101).99.47 (62.89 to 167)	0.486007	0.708 (0.39 to 0.974).0.721 (0.623 to 0.794).0.907 (0.845 to 0.999)	106.8 (91.78 to 133.3).17024 (13802 to 21329).754.2 (374.6 to 1179)	0.05546
ENSG00000018189	RUFY3	A_24_P362979	1.119 (1.012 to 1.197)	54.13 (28.36 to 76.87)	0.184	0.911 (0.772 to 1.129)	56.8 (34.74 to 100.5)	0.3	1.078 (0.794 to 1.416)	64.26 (34.77 to 136.6)	0.461	0.893 (0.67 to 1.11)	78.08 (54.98 to 109.1)	0.239
ENSG00000018280	SLC11A1	A_23_P39665, A_24_P88690	0.91 (0.67 to 1.059).0.958 (0.73 to 1.141)	45.58 (27 to 87.95).58.58 (32.09 to 87.62)	0.5075	1.077 (0.762 to 1.64).1.087 (0.871 to 1.312)	54.54 (28.59 to 99.27).75.33 (17.42 to 174.1)	0.458	1.09 (0.964 to 1.277).1.204 (0.893 to 1.676)	61.38 (25.44 to 120.2).95.06 (20.75 to 156.4)	0.25	0.995 (0.817 to 1.168).1.18 (0.764 to 2.607)	117.5 (40.31 to 190.4).87.72 (44.75 to 155.7)	0.618
ENSG00000018510	AGPS	A_23_P368645, A_24_P902100, A_32_P27706	0.929 (0.84 to 1.016).1.009 (0.969 to 1.113).1.078 (1.041 to 1.146)	1001 (753.1 to 1526).1217 (623.2 to 2273).487.6 (293.2 to 914.4)	0.263467	0.883 (0.791 to 1.039).0.976 (0.828 to 1.087).1.141 (0.941 to 1.409)	1836 (614.5 to 3990).447 (218.6 to 816.4).911.6 (626 to 1275)	0.228067	0.826 (0.692 to 0.986).0.933 (0.877 to 1.007).1.019 (0.965 to 1.128)	1018 (723.2 to 1552).1120 (586.4 to 2674).402.4 (308.7 to 567.6)	0.246927	0.646 (0.596 to 0.735).0.838 (0.666 to 0.991).1.033 (0.871 to 1.22)	1632 (1419 to 1942).503.2 (400.2 to 623.9).904.5 (570.9 to 1127)	0.221929
ENSG00000018610	CXorf56	A_23_P171223, A_24_P290373	1.044 (0.882 to 1.29).1.07 (0.938 to 1.459)	131.8 (79.97 to 214).173.2 (111.3 to 250.1)	0.349	1.226 (0.907 to 1.971).1.274 (0.925 to 2.002)	174.5 (66.02 to 300.6).240 (131.8 to 398.8)	0.0601	0.829 (0.685 to 1.06).0.917 (0.672 to 1.18)	115.7 (75.28 to 155.7).142.3 (99.16 to 181.6)	0.1638	0.644 (0.416 to 0.997).0.658 (0.481 to 1.028)	115.6 (94.06 to 143.1).164 (140.6 to 183.3)	0.006565
ENSG00000018699	TTC27	A_23_P131227	1.204 (1.142 to 1.245)	4913 (2750 to 8631)	0.000469	0.852 (0.794 to 0.937)	3946 (2031 to 7425)	0.00585	0.795 (0.722 to 0.824)	3287 (2457 to 5496)	0.00156	0.484 (0.412 to 0.603)	2506 (2115 to 2945)	1.23e-05
ENSG00000018869	ZNF582	A_23_P395464	0.975 (0.648 to 1.4)	35.4 (19.35 to 65.35)	0.863	1.164 (0.776 to 1.449)	45.62 (27.89 to 72.63)	0.207	0.894 (0.714 to 1.239)	36.23 (24.52 to 54.69)	0.423	0.699 (0.493 to 1.001)	39.48 (27.72 to 47.13)	0.0223
ENSG00000019485	PRDM11	A_23_P13057	0.971 (0.855 to 1.055)	109.4 (55.51 to 196.3)	0.568	1.013 (0.913 to 1.296)	134.7 (65.36 to 265.9)	0.835	0.938 (0.65 to 1.1)	133.2 (56.28 to 232.1)	0.426	1.048 (0.883 to 1.197)	199 (126.9 to 289.8)	0.464
ENSG00000019991	HGF	A_23_P93780	0.966 (0.88 to 1.12)	356.3 (190.1 to 677.1)	0.37	1.09 (0.971 to 1.216)	458.5 (204.7 to 904.7)	0.0758	1.066 (0.969 to 1.218)	383.6 (192.4 to 849.2)	0.172	0.825 (0.779 to 0.886)	354 (253 to 438.4)	0.00909
ENSG00000019995	ZRANB1	A_23_P86706, A_24_P389714, A_24_P9809	0.957 (0.88 to 1.028).1.054 (0.985 to 1.141).1.088 (1.024 to 1.123)	239.2 (157 to 391.1).264.6 (112 to 526.3).608.1 (272.3 to 1178)	0.1153	0.938 (0.857 to 1.027).1.076 (0.834 to 1.593).1.182 (1.037 to 1.461)	231.1 (136.7 to 425).252.1 (97.86 to 510.3).740.2 (247.6 to 1424)	0.185913	0.855 (0.689 to 1.034).1.019 (0.925 to 1.206).1.133 (0.939 to 1.395)	207.6 (106.4 to 403).261.2 (139.4 to 581.5).615.5 (333.2 to 1186)	0.2564	0.845 (0.759 to 0.924).0.879 (0.784 to 1.099).1.146 (0.829 to 1.729)	263.8 (193.9 to 302.1).349.6 (294 to 410.4).713.7 (613.1 to 793.8)	0.107367
ENSG00000020129	NCDN	A_23_P97736	1.113 (0.993 to 1.309)	243.1 (128.4 to 498.2)	0.0223	0.909 (0.851 to 0.991)	201.8 (74.42 to 391.1)	0.0786	0.939 (0.84 to 1.03)	194 (114.3 to 381.5)	0.238	0.815 (0.709 to 0.964)	229.3 (163.7 to 307.5)	0.0126
ENSG00000020181	GPR124	A_23_P43276	1.166 (0.951 to 2.056)	61.7 (28.14 to 133.3)	0.233	1.007 (0.88 to 1.45)	60.33 (26.48 to 127.7)	0.94	0.878 (0.782 to 1.111)	54.71 (22.2 to 90.52)	0.239	1.075 (0.78 to 1.407)	87.94 (55.81 to 133.1)	0.477
ENSG00000020256	ZFP64	A_23_P120467, A_23_P501877	0.992 (0.932 to 1.081).1.135 (1.019 to 1.256)	511.8 (296.3 to 967.6).951.7 (429.5 to 1874)	0.39555	0.958 (0.921 to 0.992).1.051 (0.94 to 1.113)	575.6 (202.7 to 1129).791.1 (302 to 1576)	0.269	0.924 (0.801 to 1.013).1.01 (0.909 to 1.123)	497.9 (278.7 to 918.4).709.6 (503.1 to 1340)	0.45925	0.8 (0.744 to 0.847).0.848 (0.724 to 0.962)	537.1 (442.2 to 721.4).896.8 (772 to 1202)	0.018525
ENSG00000020426	MNAT1	A_23_P32615	1.055 (1.001 to 1.139)	2397 (1260 to 4390)	0.078	0.938 (0.889 to 0.989)	2210 (1020 to 4314)	0.124	0.967 (0.807 to 1.069)	2124 (1397 to 4135)	0.498	0.723 (0.52 to 0.957)	2032 (1700 to 2386)	0.00588
ENSG00000020633	RUNX3	A_23_P51231	0.557 (0.534 to 0.581)	3917 (2305 to 6354)	1.57e-10	1.039 (0.922 to 1.135)	8004 (4932 to 13049)	0.374	1.316 (1.166 to 1.538)	9553 (6399 to 16430)	4.63e-05	1.685 (1.165 to 2.158)	16305 (11796 to 22064)	0.000143
ENSG00000020922	MRE11A	A_23_P150189, A_24_P312671	1.044 (0.968 to 1.107).1.234 (1.177 to 1.333)	294 (196.3 to 501.3).851.9 (519 to 1272)	0.0885378	0.868 (0.751 to 1.026).0.92 (0.785 to 1.033)	265.6 (145.3 to 427).653.4 (361.1 to 871.3)	0.06345	0.947 (0.863 to 1.077).0.951 (0.83 to 1.102)	264.1 (212.6 to 403.6).726.9 (458.8 to 1074)	0.28	0.552 (0.444 to 0.655).0.693 (0.59 to 0.765)	261.2 (185.3 to 314.4).608.9 (343.7 to 953.2)	0.0001894
ENSG00000021355	SERPINB1	A_23_P214330, A_24_P269315	0.742 (0.727 to 0.763).0.847 (0.797 to 0.868)	1961 (1385 to 2602).5662 (5193 to 6508)	0.00015037	1.183 (1.051 to 1.429).1.27 (1.059 to 1.582)	3454 (1770 to 4956).8900 (5682 to 11129)	0.00332	3.053 (2.635 to 4.044).3.641 (2.811 to 5.989)	24887 (17140 to 42801).8879 (5123 to 15751)	1.63385e-07	3.798 (3.539 to 4.206).4.387 (3.417 to 5.04)	17758 (7662 to 25289).35741 (16927 to 49086)	4.48681e-12
ENSG00000021574	SPAST	A_23_P209356, A_24_P941988	0.991 (0.897 to 1.089).0.997 (0.935 to 1.163)	155 (100.3 to 236).699.4 (404.6 to 1335)	0.8755	1.03 (0.991 to 1.09).1.107 (0.903 to 1.407)	180.3 (77.86 to 320.5).750.2 (337.3 to 1360)	0.296	0.993 (0.881 to 1.263).1.03 (0.94 to 1.125)	156.3 (112 to 284.7).703.6 (460.5 to 1140)	0.681	0.796 (0.722 to 0.918).1.126 (0.934 to 1.533)	180.9 (145.5 to 248.2).1051 (885 to 1405)	0.09122
ENSG00000021762	OSBPL5	A_23_P53081	1.093 (1.02 to 1.132)	13124 (4833 to 30921)	0.0151	0.807 (0.675 to 0.98)	9863 (2229 to 23078)	0.00418	1.158 (0.882 to 1.341)	12282 (5642 to 28837)	0.0442	0.762 (0.534 to 1.186)	10001 (5506 to 14642)	0.0486
ENSG00000021776	AQR	A_24_P280378, A_24_P316305	0.979 (0.894 to 1.052).1.104 (0.992 to 1.218)	1255 (629.6 to 2534).757.6 (456.1 to 1367)	0.25059	1.001 (0.923 to 1.084).1.089 (0.995 to 1.154)	1617 (458 to 3594).668.8 (375.3 to 1167)	0.50715	0.872 (0.66 to 1.037).0.949 (0.835 to 1.048)	1031 (661 to 1848).633.1 (426.9 to 896.6)	0.1577	0.805 (0.722 to 0.948).1.134 (0.968 to 1.308)	1811 (1553 to 2304).721.1 (593.7 to 812.9)	0.02889
ENSG00000021826	CPS1	A_23_P5300	0.98 (0.689 to 1.425)	91.45 (56.72 to 166.6)	0.724	0.934 (0.573 to 1.275)	89.74 (37.81 to 136.3)	0.242	1.256 (0.761 to 1.805)	111.7 (64.33 to 229.7)	0.000742	1.076 (0.817 to 1.438)	152.6 (95.17 to 231.5)	0.207
ENSG00000022277	RTFDC1	A_23_P210619, A_24_P914590	0.932 (0.9 to 0.973).1.056 (0.936 to 1.243)	260.6 (165.4 to 428).3919 (2361 to 6835)	0.1376	1.043 (0.835 to 1.388).1.073 (0.965 to 1.155)	294.5 (136.3 to 531.1).5062 (2024 to 10045)	0.3388	0.969 (0.659 to 1.21).1.041 (0.996 to 1.088)	243.7 (123.8 to 428.8).4375 (2528 to 8546)	0.4925	1.181 (0.949 to 1.761).1.316 (1.224 to 1.463)	412.1 (343.8 to 539.8).6781 (6295 to 7505)	0.0411128
ENSG00000022567	SLC45A4	A_23_P384816, A_24_P717586	0.988 (0.827 to 1.097).1.095 (0.918 to 1.281)	101 (61.76 to 197.9).148.9 (81.93 to 308.5)	0.4955	1.021 (0.618 to 1.346).1.339 (1.276 to 1.408)	205 (83.63 to 382.5).94.29 (60.83 to 110.8)	0.4185	0.725 (0.543 to 0.971).0.972 (0.783 to 1.307)	140.6 (97.62 to 215.1).64.73 (49.27 to 76.65)	0.36659	0.711 (0.592 to 0.906).0.889 (0.526 to 1.281)	195.3 (144.3 to 230.6).95.9 (78.19 to 109.9)	0.19449
ENSG00000022840	RNF10	A_23_P53630, A_24_P261724	0.948 (0.897 to 1.01).0.968 (0.925 to 1.002)	2854 (1407 to 5335).3522 (1564 to 7714)	0.196	1.039 (0.965 to 1.142).1.073 (0.935 to 1.171)	3419 (1341 to 5814).3820 (1123 to 8192)	0.2245	1.028 (0.897 to 1.189).1.086 (0.901 to 1.263)	3062 (1803 to 5428).3427 (1970 to 6984)	0.348	1.037 (0.755 to 1.279).1.168 (1.117 to 1.216)	3933 (2956 to 4819).4979 (3767 to 7579)	0.337695
ENSG00000022976	ZNF839	A_24_P361158, A_24_P53025	0.978 (0.935 to 1.051).1.141 (1.039 to 1.205)	218.1 (109.4 to 376).542.9 (298.2 to 1097)	0.227115	1.156 (0.925 to 1.41).1.317 (1.114 to 1.414)	272.4 (111.1 to 462.9).618.4 (303.7 to 936.7)	0.0115028	0.862 (0.761 to 0.925).1.023 (0.955 to 1.105)	163.9 (104.4 to 257.7).556.1 (339.4 to 924.8)	0.28185	0.907 (0.807 to 1.022).1.052 (1 to 1.153)	247.7 (155.9 to 323.9).803.7 (637.6 to 907.6)	0.2405
ENSG00000023041	ZDHHC6	A_23_P161183	1.028 (0.993 to 1.082)	538.6 (301.9 to 930.8)	0.318	1.014 (0.935 to 1.086)	562 (193.9 to 1115)	0.729	1.049 (0.993 to 1.098)	498.5 (301.3 to 800.6)	0.187	0.955 (0.862 to 1.05)	630.5 (504.4 to 793.6)	0.436
ENSG00000023171	GRAMD1B	A_24_P58620	1.226 (1.128 to 1.34)	217.6 (151.1 to 379.1)	7.84e-05	0.947 (0.873 to 1.003)	165 (96.61 to 222.7)	0.251	1.079 (0.997 to 1.148)	191.1 (149.4 to 238.8)	0.0866	0.655 (0.395 to 0.965)	195.2 (91.26 to 308.5)	0.00929
ENSG00000023191	RNH1	A_23_P202672, A_32_P116219	0.909 (0.725 to 1.245).1.088 (1.058 to 1.157)	1855 (1006 to 2823).53347 (22874 to 119369)	0.1219	0.781 (0.693 to 0.886).1.003 (0.95 to 1.076)	2365 (1090 to 3912).42836 (13133 to 99393)	0.473787	0.972 (0.753 to 1.205).1.151 (0.899 to 1.314)	2207 (1507 to 3827).46749 (22447 to 104169)	0.36655	0.978 (0.833 to 1.301).1.259 (0.975 to 1.515)	3221 (2432 to 5057).56886 (33788 to 80622)	0.39847
ENSG00000023228	NDUFS1	A_23_P131363, A_23_P131365	1.065 (1.019 to 1.105).1.07 (1.043 to 1.116)	3255 (1874 to 5860).7360 (4760 to 12712)	0.0353	0.97 (0.927 to 1.064).1.022 (1.006 to 1.06)	3313 (1420 to 6696).7687 (3387 to 14147)	0.508	0.885 (0.841 to 0.947).0.969 (0.892 to 1.054)	2919 (1903 to 5388).6209 (4210 to 11666)	0.226165	0.624 (0.528 to 0.726).0.702 (0.647 to 0.776)	2479 (2092 to 3194).6071 (5012 to 6854)	0.00018
ENSG00000023287	RB1CC1	A_23_P9056	1.078 (0.989 to 1.142)	1166 (751.9 to 1862)	0.0187	0.865 (0.75 to 0.96)	997.1 (440.9 to 1550)	0.0144	0.888 (0.796 to 1.014)	997.7 (661.8 to 1765)	0.0211	0.951 (0.785 to 1.163)	1391 (1008 to 1660)	0.505
ENSG00000023318	ERP44	A_23_P373927, A_23_P380092	0.985 (0.905 to 1.069).1.018 (0.955 to 1.111)	195.5 (96.19 to 386.6).2625 (1742 to 3986)	0.624	1.048 (0.947 to 1.213).1.365 (1.17 to 1.627)	275.7 (89.37 to 519.9).2987 (1610 to 4842)	0.166506	0.81 (0.662 to 0.922).1.048 (0.924 to 1.113)	140.2 (83.56 to 199.8).2680 (2076 to 3881)	0.11618	0.947 (0.815 to 1.14).1.084 (0.795 to 1.342)	265.2 (198.6 to 356.8).3342 (2741 to 4030)	0.3885
ENSG00000023330	ALAS1	A_23_P57877, A_24_P191588	0.729 (0.563 to 0.997).0.85 (0.839 to 0.866)	1593 (813.7 to 3070).303.8 (177.2 to 576.3)	0.00022915	1.139 (0.516 to 1.879).1.493 (1.447 to 1.595)	3190 (1147 to 6295).554.6 (205.5 to 1128)	0.183	1.093 (0.98 to 1.236).1.214 (1.089 to 1.362)	2298 (1465 to 4274).396.7 (282.1 to 634.5)	0.0224805	1.462 (1.148 to 1.807).1.799 (1.51 to 2.181)	4799 (3643 to 6392).808.6 (586.2 to 942)	6.91115e-05
ENSG00000023445	BIRC3	A_23_P98350	1.048 (0.872 to 1.817)	275.6 (116.2 to 542.1)	0.586	8.265 (5.27 to 11.14)	3111 (748.5 to 7335)	8.6e-10	1.058 (0.778 to 1.389)	260.2 (155 to 528.2)	0.44	0.274 (0.125 to 0.601)	99.65 (60.17 to 184.7)	0.000231
ENSG00000023516	AKAP11	A_23_P204929	1.12 (1.03 to 1.174)	1586 (950.2 to 2842)	0.00268	0.972 (0.929 to 1.01)	1536 (704.9 to 2653)	0.459	1.004 (0.855 to 1.167)	1455 (1035 to 2591)	0.933	1.24 (0.968 to 1.678)	2429 (1902 to 3262)	0.0226
ENSG00000023572	GLRX2	A_23_P160503	1.091 (1.022 to 1.168)	1898 (1157 to 3227)	0.0132	0.921 (0.77 to 1.132)	1890 (949.2 to 3659)	0.165	0.89 (0.832 to 0.943)	1603 (1112 to 2631)	0.0127	0.497 (0.435 to 0.542)	1158 (1065 to 1329)	4.83e-06
ENSG00000023608	SNAPC1	A_23_P37244	1.076 (1 to 1.148)	321.1 (148.4 to 512.6)	0.0333	0.963 (0.776 to 1.193)	319.8 (174.9 to 580.2)	0.548	0.837 (0.671 to 1)	255.8 (185.6 to 414)	0.0177	0.45 (0.367 to 0.537)	204.3 (139.2 to 301.7)	6.5e-06
ENSG00000023697	DERA	A_23_P25253	0.997 (0.909 to 1.056)	6072 (3526 to 9883)	0.929	0.88 (0.737 to 1.043)	6233 (3231 to 10736)	0.0342	1.173 (0.999 to 1.337)	6996 (4995 to 12269)	0.00368	0.914 (0.629 to 1.247)	7328 (6328 to 10124)	0.414
ENSG00000023734	STRAP	A_23_P13852, A_24_P338636	1.059 (0.983 to 1.11).1.061 (0.994 to 1.138)	23741 (12717 to 41820).3813 (2268 to 6916)	0.0719	0.963 (0.871 to 1.076).0.986 (0.919 to 1.037)	24945 (12280 to 48922).3962 (1822 to 7550)	0.559	0.866 (0.788 to 0.983).0.876 (0.776 to 0.935)	20866 (13418 to 38990).3129 (2018 to 5438)	0.00887	0.566 (0.471 to 0.639).0.645 (0.568 to 0.788)	17542 (15213 to 20712).3000 (2292 to 4028)	9.695e-05
ENSG00000023892	DEF6	A_23_P321913	0.972 (0.915 to 1.053)	2078 (1044 to 4260)	0.356	0.792 (0.683 to 1.003)	1617 (554.7 to 3189)	0.00426	1.203 (1.111 to 1.414)	2422 (1335 to 5167)	0.000488	1.617 (1.471 to 1.743)	4304 (3196 to 6028)	4e-09
ENSG00000023902	PLEKHO1	A_23_P35114	0.486 (0.473 to 0.502)	6507 (5091 to 7719)	3.63e-11	1.32 (1.104 to 1.77)	21499 (10044 to 35243)	0.00171	1.555 (1.177 to 2.47)	25472 (14530 to 47125)	0.00125	2.506 (1.618 to 4.292)	56053 (47067 to 72961)	3.02e-05
ENSG00000023909	GCLM	A_23_P103996, A_32_P177953	1.054 (0.965 to 1.125).1.057 (0.981 to 1.092)	1436 (801.4 to 2509).631 (410.4 to 1078)	0.08185	1.253 (1.065 to 1.476).1.307 (1.206 to 1.379)	1870 (899.3 to 3274).762.1 (446.4 to 1110)	0.00024809	0.769 (0.684 to 0.824).0.779 (0.683 to 0.976)	1061 (738.6 to 1737).459.8 (303.2 to 722.9)	0.0006375	0.229 (0.168 to 0.331).0.247 (0.145 to 0.392)	202 (131.9 to 291.5).470.4 (286.7 to 605.3)	3.155e-05
ENSG00000024048	UBR2	A_23_P362637, A_32_P222664	1.01 (0.972 to 1.085).1.055 (0.964 to 1.175)	1018 (621 to 1698).940.3 (488.7 to 1856)	0.4175	0.897 (0.839 to 0.966).0.905 (0.778 to 1.016)	768.3 (354.5 to 1193).907.7 (478.3 to 1409)	0.03985	0.995 (0.864 to 1.129).1.332 (1.211 to 1.574)	1328 (876.1 to 2158).868.2 (574.1 to 1193)	0.452501	1.132 (0.904 to 1.452).1.312 (1.07 to 1.594)	1555 (945 to 1969).1597 (1446 to 1713)	0.0568975
ENSG00000024862	CCDC28A	A_23_P31085	0.95 (0.927 to 0.972)	7247 (4050 to 13484)	0.083	1.021 (0.991 to 1.06)	8394 (2982 to 16324)	0.561	1.146 (1.121 to 1.17)	8467 (5132 to 16678)	0.000324	1.227 (1.067 to 1.383)	10901 (9066 to 12308)	0.00172
ENSG00000025039	RRAGD	A_23_P133691	1.006 (0.934 to 1.059)	586.7 (373.1 to 942.2)	0.816	0.786 (0.762 to 0.833)	481.2 (342.8 to 672)	8.39e-05	1.016 (0.948 to 1.092)	614.4 (557.9 to 795.5)	0.675	1.071 (0.91 to 1.29)	883 (691.6 to 1052)	0.27
ENSG00000025156	HSF2	A_23_P111360, A_32_P9963	1.145 (1.1 to 1.176).1.211 (1.006 to 1.771)	2479 (1551 to 4511).87.59 (51.67 to 152.6)	0.016195	0.862 (0.681 to 1.112).0.886 (0.836 to 0.935)	2040 (760.1 to 3832).62.46 (24.2 to 123.7)	0.084	0.919 (0.633 to 1.239).0.974 (0.933 to 1.026)	2079 (1265 to 4005).63.2 (37.71 to 99.79)	0.47	0.709 (0.431 to 0.922).0.736 (0.628 to 0.808)	1912 (1569 to 2169).90.91 (47.86 to 184.2)	0.0075275
ENSG00000025293	PHF20	A_23_P210969, A_24_P181944, A_24_P297098	1.012 (0.953 to 1.121).1.05 (0.926 to 1.166).1.087 (0.998 to 1.274)	182 (101.3 to 346.4).1143 (592.1 to 1961).492.9 (303.9 to 856.4)	0.301667	0.957 (0.77 to 1.093).0.959 (0.822 to 1.063).1.017 (0.96 to 1.119)	167.6 (82.34 to 285.4).1041 (535.9 to 1596).496.3 (189.9 to 775)	0.518333	0.94 (0.866 to 1.042).0.945 (0.823 to 1.102).0.973 (0.861 to 1.084)	151.8 (95.35 to 274.4).1021 (616.5 to 1763).446.6 (287.2 to 687.6)	0.344	1.076 (0.956 to 1.152).1.27 (0.969 to 1.577).1.28 (1.137 to 1.416)	1837 (1207 to 2371).258.5 (199.4 to 315.7).813 (666.8 to 949)	0.0662537
ENSG00000025434	NR1H3	A_23_P47135	0.926 (0.873 to 0.989)	1257 (823.6 to 2177)	0.0258	1.372 (1.119 to 1.724)	2236 (718.1 to 4590)	0.000146	1.111 (1.011 to 1.252)	1613 (942.3 to 3204)	0.018	2.264 (1.501 to 3.403)	4498 (2610 to 7623)	1.56e-05
ENSG00000025708	TYMP	A_23_P91802	0.86 (0.787 to 0.937)	640.3 (356.3 to 1214)	0.00135	0.981 (0.869 to 1.092)	769.2 (346.3 to 1434)	0.681	1.421 (1.24 to 1.585)	1094 (564 to 2239)	4.17e-08	2.713 (2.341 to 3.576)	2971 (2759 to 3406)	1.01e-09
ENSG00000025770	NCAPH2	A_23_P369960, A_23_P80398	1.034 (0.933 to 1.112).1.046 (0.953 to 1.08)	253 (133 to 495.7).5742 (2968 to 11382)	0.265	0.854 (0.611 to 1.002).1.009 (0.921 to 1.129)	231.9 (73.83 to 454.9).5987 (2121 to 12400)	0.4369	0.944 (0.747 to 1.13).1.012 (0.967 to 1.091)	220.3 (108.1 to 452.4).5568 (3011 to 12040)	0.5575	0.699 (0.555 to 0.838).0.783 (0.675 to 0.974)	215.9 (127.2 to 301.9).4933 (3584 to 6098)	0.0050045
ENSG00000025772	TOMM34	A_23_P57033, A_24_P199097	1.166 (1.002 to 1.345).1.246 (0.999 to 1.377)	119 (63.7 to 222).119 (82.41 to 199.3)	0.004755	0.877 (0.71 to 1.045).1.076 (0.894 to 1.416)	104.7 (50.18 to 174.2).95.14 (31.07 to 184.8)	0.2399	0.821 (0.722 to 1.091).0.888 (0.708 to 1.141)	82.79 (42.29 to 177.3).90.06 (50.77 to 158.3)	0.10085	0.585 (0.464 to 0.668).0.697 (0.515 to 0.92)	101.4 (56.46 to 153).89.59 (66.67 to 116.2)	0.002263
ENSG00000025796	SEC63	A_23_P214977, A_24_P123720, A_24_P192183, A_24_P402064	1.011 (0.979 to 1.071).1.04 (1.002 to 1.093).1.239 (1.013 to 1.425).1.311 (1.048 to 1.599)	2439 (1750 to 3538).390.4 (191.2 to 714.6).5435 (3181 to 10550).871.3 (553.6 to 1396)	0.221137	0.934 (0.799 to 1.057).0.95 (0.73 to 1.11).1.017 (0.736 to 1.247).1.06 (0.855 to 1.281)	2000 (969.7 to 2866).434.7 (172.9 to 719.6).4922 (2340 to 7424).685.9 (318.3 to 1031)	0.46025	0.781 (0.706 to 0.9).0.797 (0.704 to 0.886).0.862 (0.696 to 1.025).0.938 (0.715 to 1.162)	1627 (940.7 to 2668).323.3 (183.3 to 592.4).4804 (3610 to 6798).553.5 (277.9 to 983.3)	0.102101	0.599 (0.341 to 0.883).0.633 (0.382 to 0.865).0.737 (0.632 to 0.855).0.959 (0.719 to 1.122)	1824 (778.9 to 2956).495.5 (368.4 to 622.9).5053 (4148 to 6037).624.3 (379.1 to 936.2)	0.144427
ENSG00000025800	KPNA6	A_24_P128563	1.093 (0.957 to 1.265)	480 (268.9 to 848)	0.055	1.049 (0.976 to 1.144)	454.9 (196.4 to 774.5)	0.237	0.941 (0.881 to 1.105)	394 (228.7 to 624.1)	0.203	0.9 (0.659 to 1.057)	535.8 (339.5 to 786)	0.194
ENSG00000026025	VIM	A_23_P161194	1.111 (0.992 to 1.199)	10239 (3745 to 23946)	0.00529	1.064 (0.81 to 1.236)	8835 (2979 to 16910)	0.372	0.305 (0.245 to 0.394)	2423 (1252 to 5382)	4.64e-05	0.0579 (0.0383 to 0.08)	666 (207 to 1240)	0.00284
ENSG00000026036	RTEL1-TNFRSF6B	A_23_P218646, A_23_P378526	1.077 (1.01 to 1.146).1.126 (1.017 to 1.258)	1125 (722.4 to 2111).220.2 (88.75 to 448.3)	0.033155	0.788 (0.715 to 0.866).0.845 (0.644 to 1.041)	168.6 (48.32 to 235.8).884.9 (517.6 to 1312)	0.023925	0.956 (0.808 to 1.076).0.973 (0.905 to 1.032)	183.1 (77.13 to 344.7).1097 (696.7 to 1890)	0.457	0.62 (0.539 to 0.743).0.84 (0.662 to 1.083)	234.3 (108.2 to 323.3).942.8 (723.7 to 1300)	0.0292005
ENSG00000026103	FAS	A_23_P63896	1.012 (0.808 to 1.32)	93.89 (46.57 to 186.1)	0.813	0.831 (0.562 to 1.449)	87.38 (31.21 to 205.3)	0.0338	0.851 (0.644 to 1.22)	80.97 (51.9 to 168.2)	0.0424	0.453 (0.265 to 0.6)	61.77 (35.95 to 83.7)	2.31e-06
ENSG00000026297	RNASET2	A_24_P289471, A_24_P360269	0.986 (0.925 to 1.065).1.026 (0.993 to 1.071)	15863 (11899 to 26244).7308 (5289 to 11505)	0.477	0.905 (0.827 to 0.976).0.952 (0.931 to 0.976)	15460 (9835 to 21906).6770 (4379 to 9517)	0.1187	0.974 (0.939 to 1.003).1.029 (0.939 to 1.112)	15786 (12380 to 21434).7836 (6019 to 10566)	0.467	1.368 (1.112 to 1.96).1.377 (1.254 to 1.63)	14008 (13308 to 14995).30853 (26153 to 34190)	0.00130055
ENSG00000026508	CD44	A_23_P24870	1.024 (0.836 to 1.153)	5419 (2703 to 11926)	0.306	0.872 (0.635 to 0.978)	4983 (2149 to 10733)	0.00432	0.865 (0.706 to 1.214)	4824 (2260 to 12841)	0.0203	0.282 (0.207 to 0.475)	1887 (1159 to 3535)	8.03e-07
ENSG00000026559	KCNG1	A_24_P237117	0.881 (0.493 to 1.477)	89.89 (56.57 to 152.2)	0.293	1.042 (0.918 to 1.283)	125.8 (68.96 to 252.8)	0.505	1.023 (0.834 to 1.362)	120 (58.92 to 266.4)	0.77	1.108 (0.985 to 1.215)	168.7 (114.1 to 272.1)	0.0941
ENSG00000026950	BTN3A1	A_24_P126282, A_24_P329065	0.867 (0.701 to 1.022).1.052 (0.992 to 1.077)	378.5 (210.4 to 764.4).58.09 (25.98 to 123.4)	0.1445	0.737 (0.654 to 0.866).1.041 (0.886 to 1.777)	257 (118.3 to 414.1).61.41 (21.25 to 119.2)	0.365562	1.347 (1.236 to 1.456).1.362 (1.024 to 1.647)	475.3 (298.3 to 860.3).83.56 (40.93 to 170.8)	0.00124504	1.084 (0.993 to 1.209).1.115 (1.017 to 1.205)	516 (436.3 to 616.1).96.27 (48.12 to 159)	0.137
ENSG00000027001	MIPEP	A_23_P117274	1.124 (1.038 to 1.289)	469.4 (249.2 to 941.4)	0.00468	0.907 (0.809 to 1.013)	385.9 (135.1 to 735.2)	0.0586	0.707 (0.657 to 0.759)	277.2 (167.2 to 525)	7.59e-05	0.234 (0.159 to 0.293)	124.3 (72.88 to 175.6)	9.6e-05
ENSG00000027697	IFNGR1	A_23_P8281	0.988 (0.969 to 1.017)	4580 (2299 to 8201)	0.62	0.886 (0.811 to 0.939)	4295 (1690 to 7979)	0.0144	1.107 (0.973 to 1.208)	5020 (2847 to 10245)	0.0295	1.441 (1.07 to 2.24)	8021 (6172 to 10605)	0.00571
ENSG00000027847	B4GALT7	A_23_P41872	0.994 (0.887 to 1.171)	490.2 (276.8 to 961)	0.879	0.865 (0.785 to 0.961)	415.1 (171.2 to 757.2)	0.00784	0.991 (0.862 to 1.121)	468.4 (252.5 to 838.7)	0.864	1.125 (1.019 to 1.236)	697 (511.6 to 962)	0.0364
ENSG00000027869	SH2D2A	A_23_P160618	0.938 (0.864 to 1.025)	277.9 (149.4 to 506.7)	0.0808	1.033 (0.997 to 1.093)	308.1 (107.7 to 663.4)	0.426	0.975 (0.867 to 1.205)	348.9 (127 to 826.2)	0.683	1.142 (1.027 to 1.334)	500.3 (283.9 to 810.4)	0.0283
ENSG00000028116	VRK2	A_23_P119992	1.013 (0.95 to 1.094)	1709 (1078 to 2968)	0.641	1.028 (0.957 to 1.127)	1802 (922.7 to 3163)	0.479	1.079 (0.935 to 1.183)	1860 (1220 to 3123)	0.0828	0.831 (0.727 to 0.912)	1868 (1716 to 2007)	0.0165
ENSG00000028137	TNFRSF1B	A_24_P54174	0.899 (0.8 to 1.056)	161.9 (96.78 to 308.6)	0.0518	0.84 (0.736 to 0.978)	153.8 (89.92 to 260.7)	0.00702	1.626 (1.4 to 2.031)	358.7 (215.1 to 668.2)	8.03e-07	2.136 (1.87 to 2.697)	690 (574.8 to 892.1)	2.2e-08
ENSG00000028203	VEZT	A_23_P204609	0.932 (0.878 to 1.027)	962.2 (552.2 to 1773)	0.0455	1.104 (1.029 to 1.184)	1178 (490.2 to 2103)	0.0117	0.973 (0.878 to 1.052)	1003 (689.6 to 2034)	0.524	0.968 (0.904 to 1.05)	1258 (1091 to 1564)	0.565
ENSG00000028310	BRD9	A_23_P19004	1.109 (1.052 to 1.201)	920.4 (529.1 to 1704)	0.00856	0.825 (0.712 to 0.935)	667.1 (280.8 to 1155)	0.00254	0.929 (0.845 to 1.016)	767 (425.5 to 1475)	0.104	0.902 (0.733 to 1.013)	953.2 (613 to 1207)	0.157
ENSG00000028528	SNX1	A_23_P49033	1.057 (1.021 to 1.137)	2718 (1549 to 5273)	0.0838	0.946 (0.902 to 1.021)	2457 (927.4 to 4482)	0.189	1.057 (1 to 1.172)	2567 (1595 to 4366)	0.162	1.038 (0.899 to 1.286)	3282 (2343 to 4081)	0.594
ENSG00000028839	TBPL1	A_23_P168276	0.971 (0.91 to 1.011)	1194 (580.5 to 2084)	0.286	1.026 (0.93 to 1.104)	1374 (648.3 to 2580)	0.512	1.113 (0.973 to 1.233)	1345 (851.3 to 2667)	0.0171	1.117 (0.99 to 1.231)	1727 (1237 to 2281)	0.0593
ENSG00000029153	ARNTL2	A_23_P53345	1.051 (0.945 to 1.12)	185.5 (107.7 to 342.1)	0.202	0.986 (0.83 to 1.39)	176.4 (120.1 to 266.5)	0.842	1.061 (0.869 to 1.191)	192 (129.3 to 269.9)	0.264	0.497 (0.384 to 0.617)	142.7 (99.09 to 222.2)	2.78e-05
ENSG00000029363	BCLAF1	A_23_P111343, A_24_P80915, A_24_P89512	1.023 (0.934 to 1.094).1.078 (0.975 to 1.211).1.095 (1.003 to 1.176)	125.2 (67.69 to 231.6).4883 (2712 to 8561).8762 (4710 to 15977)	0.18075	0.747 (0.493 to 1.032).0.995 (0.898 to 1.076).1.02 (0.942 to 1.151)	4860 (2179 to 8148).92.37 (32.23 to 178.6).9633 (4545 to 19346)	0.524833	0.708 (0.43 to 0.913).0.773 (0.66 to 0.904).0.79 (0.751 to 0.832)	3756 (1922 to 6853).7027 (4808 to 13469).87.29 (41.37 to 167)	0.00291967	0.541 (0.367 to 0.65).0.581 (0.535 to 0.674).1.257 (0.936 to 1.746)	205.7 (179.1 to 247.6).3532 (2189 to 5155).6482 (6075 to 7261)	0.00591873
ENSG00000029364	SLC39A9	A_23_P380326	0.967 (0.881 to 1.164)	94.8 (57.62 to 148.4)	0.576	0.912 (0.734 to 1.073)	109.9 (30.29 to 224.3)	0.234	1.148 (0.961 to 1.768)	115.7 (60.95 to 198.2)	0.126	1.021 (0.73 to 1.252)	153 (125.9 to 188.9)	0.801
ENSG00000029639	TFB1M	A_23_P93499	1.275 (1.142 to 1.418)	2285 (1482 to 3781)	2.16e-06	0.958 (0.887 to 1.054)	1870 (954.2 to 3024)	0.324	0.986 (0.896 to 1.098)	1788 (1102 to 3125)	0.731	0.607 (0.533 to 0.667)	1425 (1173 to 1629)	3.42e-05
ENSG00000029725	RABEP1	A_24_P399174, A_24_P945147, A_32_P142013	1.002 (0.868 to 1.215).1.026 (0.96 to 1.085).1.079 (1.023 to 1.156)	159.2 (96.17 to 294.7).348.8 (173.5 to 677.1).686.1 (443.5 to 1163)	0.501333	1.013 (0.839 to 1.118).1.024 (0.962 to 1.236).1.043 (0.995 to 1.095)	166.9 (72.37 to 314.3).334.2 (146.3 to 616.4).689.1 (502.5 to 1227)	0.556667	0.901 (0.801 to 1).0.959 (0.787 to 1.148).1.003 (0.841 to 1.219)	131.1 (95.12 to 206.7).305.7 (200.1 to 573.4).656.7 (359.7 to 1109)	0.501933	0.619 (0.598 to 0.66).0.81 (0.622 to 1.06).1.06 (0.978 to 1.23)	125.3 (114.8 to 134.2).349.1 (314.7 to 397.4).984.1 (743.2 to 1166)	0.112083
ENSG00000030066	NUP160	A_23_P43726, A_24_P922606	0.972 (0.911 to 1.054).1.09 (1.002 to 1.24)	295.5 (163.5 to 549.1).4215 (2238 to 8355)	0.213	1.045 (0.955 to 1.13).1.129 (0.966 to 1.273)	345 (115.5 to 682.8).4002 (1498 to 7300)	0.14715	0.701 (0.542 to 0.888).0.911 (0.759 to 1.035)	198.9 (107.6 to 347.4).3231 (2095 to 5322)	0.0552455	0.509 (0.359 to 0.763).0.724 (0.651 to 0.856)	198.9 (129.8 to 295.3).3643 (3009 to 5021)	0.0005955
ENSG00000030110	BAK1	A_23_P145357	0.925 (0.871 to 1.025)	855.5 (547.7 to 1565)	0.0347	0.991 (0.956 to 1.032)	923.3 (464.9 to 1495)	0.816	1.335 (1.161 to 1.523)	1254 (726.3 to 2177)	3.18e-06	1.635 (1.431 to 1.785)	2047 (1762 to 2257)	5.96e-09
ENSG00000030419	IKZF2	A_32_P114284, A_32_P127978	1.109 (0.988 to 1.212).1.227 (1.135 to 1.329)	2089 (393.9 to 5671).804.2 (158.6 to 2187)	0.00448263	1.202 (1.076 to 1.341).1.336 (0.992 to 1.753)	2511 (254.7 to 7091).735.4 (145.2 to 1544)	0.0015395	0.345 (0.286 to 0.385).0.352 (0.292 to 0.406)	220.6 (52.65 to 607.4).714.1 (122.4 to 2381)	3.9096e-05	0.143 (0.0647 to 0.248).0.238 (0.0976 to 0.446)	143 (103.4 to 191.7).200.1 (135.8 to 302.9)	0.001004
ENSG00000030582	GRN	A_23_P49708	0.846 (0.777 to 0.899)	18431 (12056 to 29838)	0.000838	1.065 (0.814 to 1.265)	26528 (13250 to 46739)	0.368	2.387 (2.137 to 2.691)	50365 (38567 to 78010)	2.48e-13	2.979 (2.414 to 3.418)	84601 (61332 to 103320)	7.65e-11
ENSG00000031003	FAM13B	A_23_P136460, A_24_P20700	0.837 (0.743 to 0.99).1.016 (0.774 to 1.277)	456.3 (259.5 to 822.4).61.03 (43.85 to 109.5)	0.430385	0.996 (0.894 to 1.271).1.085 (0.917 to 1.303)	70.74 (35.83 to 129.2).716.3 (268.3 to 1645)	0.551	0.758 (0.457 to 0.92).0.829 (0.6 to 1.166)	465.5 (217.8 to 935.3).58.3 (42.67 to 91.77)	0.0421	0.797 (0.502 to 1.337).1.104 (0.936 to 1.291)	78.21 (50.3 to 102.6).794.8 (554.3 to 1235)	0.12
ENSG00000031691	CENPQ	A_23_P70328	1.003 (0.814 to 1.231)	1602 (887 to 3323)	0.883	1.234 (0.961 to 1.824)	2288 (958.8 to 5131)	0.00405	1.077 (0.846 to 1.551)	1780 (1047 to 4162)	0.202	0.804 (0.65 to 1.062)	1681 (1234 to 2283)	0.00264
ENSG00000031698	SARS	A_23_P126790	1.002 (0.946 to 1.082)	1771 (980.4 to 3101)	0.929	1.024 (0.935 to 1.201)	2001 (838.5 to 3647)	0.611	1.006 (0.917 to 1.061)	1752 (1147 to 3203)	0.874	1.15 (1 to 1.354)	2620 (2279 to 3483)	0.0301
ENSG00000031823	RANBP3	A_23_P310331, A_24_P241862	0.962 (0.938 to 0.995).1.046 (0.913 to 1.174)	114.4 (58.08 to 233.2).7847 (3878 to 15872)	0.3095	0.875 (0.727 to 1.089).1.093 (1.058 to 1.144)	105.3 (24.6 to 213.2).9955 (3339 to 21437)	0.08115	0.957 (0.827 to 1.227).1.031 (0.934 to 1.089)	8013 (4514 to 15756).97.75 (52.91 to 217.8)	0.502	0.898 (0.667 to 1.044).0.949 (0.865 to 1.025)	133 (88.36 to 194.5).9050 (6977 to 10806)	0.2925
ENSG00000032219	ARID4A	A_23_P117515, A_24_P330309	0.855 (0.727 to 1.067).0.875 (0.715 to 1.066)	137.6 (80.51 to 239.7).142.3 (81.08 to 236)	0.02735	0.969 (0.813 to 1.113).0.988 (0.838 to 1.097)	148 (72.18 to 196).159.1 (69.15 to 230.1)	0.7	1.086 (0.796 to 1.235).1.127 (0.983 to 1.332)	162.4 (116.4 to 221.7).171.2 (104.3 to 231.4)	0.1176	1.064 (0.866 to 1.282).1.081 (0.875 to 1.369)	241.7 (163 to 358.1).252.3 (157.1 to 341.1)	0.345
ENSG00000032389	TSSC1	A_23_P256773	1.059 (0.992 to 1.19)	4885 (2963 to 8356)	0.0741	0.967 (0.874 to 1.103)	4936 (2471 to 9089)	0.478	1.019 (0.923 to 1.216)	4726 (3037 to 9029)	0.701	0.953 (0.78 to 1.242)	5539 (4529 to 7335)	0.549
ENSG00000032444	PNPLA6	A_23_P16166	0.977 (0.843 to 1.123)	178.4 (89.23 to 335.9)	0.626	0.914 (0.813 to 1.006)	178.7 (61.48 to 330.1)	0.11	1.134 (1.011 to 1.271)	201.1 (115.2 to 389.6)	0.0146	1.096 (0.964 to 1.25)	265.4 (194.4 to 315.2)	0.119
ENSG00000033011	ALG1	A_23_P66306, A_24_P586523, A_32_P158355, A_32_P65395	1.004 (0.976 to 1.049).1.034 (1.003 to 1.098).1.082 (1.033 to 1.133).1.087 (1.025 to 1.138)	1242 (707.7 to 2371).1263 (781.8 to 2122).3965 (2500 to 7129).849.7 (457.5 to 1640)	0.281725	0.959 (0.873 to 1.057).0.961 (0.852 to 1.075).1.009 (0.933 to 1.082).1.076 (0.87 to 1.333)	1097 (419.1 to 2445).1161 (488.2 to 2161).1209 (697.8 to 2196).4047 (2017 to 6969)	0.45075	0.879 (0.838 to 0.943).0.904 (0.826 to 1.026).0.929 (0.864 to 0.978).0.945 (0.922 to 0.99)	1085 (654.8 to 2152).3689 (2433 to 5936).776.8 (467.5 to 1581).988.8 (592.9 to 1847)	0.0650525	0.569 (0.497 to 0.659).0.635 (0.523 to 0.701).0.647 (0.568 to 0.769).0.831 (0.761 to 0.885)	4127 (3482 to 4684).649.4 (483.4 to 858.2).911.6 (681.5 to 1118).949 (719.8 to 1263)	0.00293927
ENSG00000033030	ZCCHC8	A_23_P64669	1.013 (0.986 to 1.047)	2581 (1391 to 4622)	0.64	1.33 (1.182 to 1.53)	3585 (1604 to 6498)	3.21e-06	1.01 (0.858 to 1.099)	2578 (1399 to 5124)	0.824	0.86 (0.754 to 1.042)	2772 (2253 to 3084)	0.0529
ENSG00000033050	ABCF2	A_23_P215175, A_24_P380629	1.038 (0.992 to 1.098).1.159 (1.038 to 1.337)	1914 (1103 to 3744).539.8 (255.9 to 1071)	0.11858	0.896 (0.751 to 1.117).1.026 (0.875 to 1.235)	1753 (769.2 to 3171).516 (175.6 to 1137)	0.377	0.718 (0.639 to 0.777).0.867 (0.803 to 0.963)	1386 (903.6 to 2394).362.9 (198.7 to 758)	0.00396335	0.409 (0.289 to 0.495).0.714 (0.615 to 0.842)	1476 (1184 to 1710).281.4 (183 to 418.5)	0.00039365
ENSG00000033100	CHPF2	A_23_P397055, A_32_P54442	0.95 (0.893 to 1.005).0.981 (0.929 to 1.046)	13859 (7962 to 25696).535.4 (254.8 to 981.6)	0.3465	0.958 (0.861 to 1.005).1.013 (0.97 to 1.096)	16184 (7351 to 28443).508.3 (213.1 to 971.2)	0.532	0.961 (0.877 to 1.039).1.016 (0.864 to 1.106)	14649 (8630 to 26567).505.3 (287.6 to 872.4)	0.534	1.009 (0.927 to 1.105).1.03 (0.909 to 1.185)	18628 (14777 to 21201).725.4 (572.6 to 866.6)	0.749
ENSG00000033170	FUT8	A_23_P313632	0.953 (0.861 to 1.031)	234.5 (102.9 to 490.5)	0.264	0.759 (0.638 to 0.845)	190.2 (49.48 to 364.8)	0.000469	1.047 (0.893 to 1.26)	243.7 (147.3 to 488.7)	0.378	1.762 (1.515 to 2.223)	514 (352.9 to 657.2)	4.82e-07
ENSG00000033178	UBA6	A_23_P218905, A_24_P166144, A_24_P316270	1.218 (0.821 to 1.531).1.258 (1.034 to 1.371).1.289 (1.134 to 1.418)	123.1 (43.68 to 216.9).123.1 (65.3 to 218.4).169.5 (52.17 to 336.5)	0.00853173	0.983 (0.68 to 1.633).1.09 (0.572 to 1.916).1.32 (0.663 to 2.543)	123.7 (43.81 to 167.5).129.9 (53.29 to 176.2).97.53 (40.86 to 147)	0.524667	0.827 (0.386 to 1.37).0.898 (0.576 to 1.495).0.93 (0.702 to 1.349)	100.8 (54.66 to 138.5).103.8 (45.32 to 177.1).89.59 (57.74 to 148.9)	0.351667	0.59 (0.333 to 0.876).0.89 (0.569 to 1.492).0.894 (0.55 to 1.175)	124.7 (73.28 to 201.7).161 (90.82 to 274.4).85.63 (53.22 to 122.7)	0.222437
ENSG00000033327	GAB2	A_23_P203743	0.875 (0.845 to 0.909)	651.2 (499.2 to 986)	0.000987	0.704 (0.534 to 0.85)	525.9 (277.2 to 621.6)	0.000471	1.089 (0.971 to 1.242)	830 (663.5 to 1208)	0.0603	3.577 (3.06 to 4.376)	3884 (3266 to 4433)	9.29e-12
ENSG00000033627	ATP6V0A1	A_24_P333733	0.966 (0.916 to 1.025)	1159 (494 to 2631)	0.311	0.97 (0.858 to 1.136)	1109 (407 to 2336)	0.529	0.702 (0.61 to 0.756)	754.6 (393.4 to 1608)	4.65e-05	4.187 (2.59 to 6.089)	6892 (3072 to 10065)	7.19e-08
ENSG00000033800	PIAS1	A_23_P163347, A_23_P163353	0.981 (0.916 to 1.076).1.102 (0.741 to 1.354)	1887 (860.2 to 3622).240.8 (151.9 to 391.7)	0.3485	0.874 (0.744 to 0.935).1.035 (0.867 to 1.208)	199.5 (91.21 to 331.1).1833 (754.9 to 2893)	0.26315	0.999 (0.771 to 1.15).1.104 (0.902 to 1.247)	203.6 (133.5 to 329.7).2031 (1019 to 3730)	0.53755	1.27 (1.001 to 1.619).1.345 (1.084 to 1.607)	371.9 (247.4 to 514).3248 (2452 to 4334)	0.003817
ENSG00000033867	SLC4A7	A_23_P132468, A_24_P362931, A_24_P368575	1.249 (1.146 to 1.352).1.287 (1.093 to 1.452).1.333 (1.079 to 1.612)	261.2 (170 to 361.1).736.2 (445.2 to 1290).876.2 (406 to 1557)	0.000112433	0.594 (0.444 to 0.781).0.745 (0.527 to 0.899).0.824 (0.562 to 1.06)	165.4 (69.15 to 252).355.9 (206 to 574.4).535.3 (200.3 to 725.8)	0.0238277	0.978 (0.751 to 1.153).1.009 (0.742 to 1.325).1.098 (0.914 to 1.491)	212.3 (118.4 to 396.6).610.5 (392.4 to 1215).736.1 (382.4 to 1339)	0.618333	0.681 (0.4 to 1.002).0.713 (0.544 to 0.858).0.744 (0.422 to 1.048)	220.1 (121.8 to 362.2).578.7 (423.3 to 645.3).702.2 (428.9 to 1181)	0.0266767
ENSG00000034063	UHRF1	A_23_P208880, A_32_P101235	1.039 (0.949 to 1.165).1.073 (0.958 to 1.249)	395.6 (215.8 to 791.7).6155 (3509 to 12489)	0.14545	0.964 (0.892 to 1.073).0.973 (0.928 to 1.023)	361 (118.2 to 661).6051 (2410 to 11041)	0.4475	0.841 (0.719 to 1.088).0.876 (0.726 to 0.977)	294.2 (150 to 472.1).5248 (2889 to 8632)	0.0244	0.517 (0.386 to 0.617).0.56 (0.5 to 0.679)	257.8 (141.2 to 351.8).4525 (2993 to 5943)	4.63e-05
ENSG00000034152	MAP2K3	A_23_P118427, A_24_P296698	0.738 (0.707 to 0.791).0.853 (0.812 to 0.909)	12718 (6598 to 25813).946.9 (450.7 to 1898)	0.000145305	1.08 (0.898 to 1.237).1.087 (0.89 to 1.227)	18257 (6594 to 34742).1142 (481.3 to 1986)	0.137	1.009 (0.956 to 1.073).1.024 (0.916 to 1.111)	16880 (9459 to 34431).1054 (571.4 to 2062)	0.6915	1.058 (1.025 to 1.085).1.13 (0.997 to 1.335)	1586 (1064 to 2347).22866 (18712 to 33350)	0.16145
ENSG00000034510	TMSB10	A_23_P68106	0.877 (0.842 to 0.929)	5701 (3451 to 9294)	0.00289	1.056 (0.908 to 1.244)	7976 (3474 to 15037)	0.298	1.282 (1.074 to 1.655)	9124 (4693 to 20046)	0.00135	2.632 (1.819 to 3.657)	21375 (16353 to 29743)	6.89e-07
ENSG00000034533	ASTE1	A_23_P121141	1.033 (0.846 to 1.151)	249 (121.7 to 496.7)	0.481	1.146 (0.911 to 1.38)	270 (80.94 to 506.3)	0.0309	0.961 (0.864 to 1.06)	211.4 (119.7 to 427.3)	0.411	1.102 (0.917 to 1.36)	366.5 (215.1 to 587.4)	0.176
ENSG00000034677	RNF19A	A_24_P411899	0.952 (0.88 to 1.057)	268 (141.2 to 473.5)	0.196	0.956 (0.795 to 1.176)	274.3 (114.2 to 461.8)	0.459	1.157 (0.931 to 1.453)	320.8 (227.4 to 605)	0.0421	1.562 (1.168 to 2.352)	609 (491.9 to 717.8)	0.00058
ENSG00000034693	PEX3	A_23_P259328, A_24_P320597	1.03 (0.937 to 1.17).1.041 (0.998 to 1.074)	439.8 (305.3 to 655.9).488.5 (270.6 to 855.7)	0.296	1.049 (0.919 to 1.192).1.096 (0.968 to 1.275)	486.7 (257.1 to 740.2).517.8 (301 to 943)	0.1858	0.813 (0.687 to 0.958).0.821 (0.746 to 0.915)	351.1 (289.1 to 544.9).360.3 (228.4 to 475.6)	0.0016025	0.45 (0.387 to 0.524).0.65 (0.581 to 0.745)	290.5 (179.6 to 388.8).394 (262.8 to 496.9)	4.8435e-05
ENSG00000034713	GABARAPL2	A_24_P356338	1.024 (0.961 to 1.089)	1405 (762 to 2743)	0.394	0.895 (0.752 to 1.069)	1280 (616.5 to 2495)	0.0786	0.945 (0.83 to 1.168)	1294 (814.2 to 2552)	0.275	1.261 (1.068 to 1.598)	2224 (1523 to 2832)	0.00392
ENSG00000035115	SH3YL1	A_23_P68198	0.847 (0.681 to 1.021)	74.14 (40.13 to 146.3)	0.0676	1.17 (0.92 to 1.506)	109.3 (46.99 to 180.9)	0.0501	1.001 (0.807 to 1.25)	91.83 (57.04 to 115.6)	0.984	1.223 (1.004 to 1.49)	159.5 (123.1 to 222.7)	0.00954
ENSG00000035141	FAM136A	A_23_P108641	1.002 (0.95 to 1.051)	11487 (6166 to 22587)	0.936	0.988 (0.948 to 1.017)	12878 (4819 to 28408)	0.755	0.876 (0.805 to 0.917)	10028 (6107 to 20574)	0.00629	0.626 (0.565 to 0.743)	9144 (7839 to 11019)	8.2e-05
ENSG00000035403	VCL	A_23_P202280, A_24_P47182	0.917 (0.768 to 1.202).0.985 (0.923 to 1.057)	131.7 (85.54 to 228.6).1304 (740.8 to 2450)	0.3945	0.735 (0.467 to 0.896).0.905 (0.84 to 1.032)	117.7 (59.73 to 198.4).1186 (441.2 to 2195)	0.029605	1.064 (1.001 to 1.107).1.09 (1.01 to 1.144)	153.7 (101.4 to 241.6).1348 (851.8 to 2284)	0.0994	1.666 (1.234 to 2.754).2.452 (1.864 to 3.639)	367.2 (275.6 to 500.8).4491 (3140 to 6405)	0.000665367
ENSG00000035499	DEPDC1B	A_23_P361419	1.015 (0.956 to 1.11)	785 (419 to 1472)	0.589	0.88 (0.781 to 1.103)	736.8 (283.7 to 1418)	0.0462	1.23 (0.922 to 1.574)	971.1 (579.1 to 2046)	0.0125	0.987 (0.781 to 1.336)	1020 (855.6 to 1118)	0.875
ENSG00000035681	NSMAF	A_23_P134809	1.045 (0.957 to 1.203)	6169 (2516 to 13180)	0.236	1.013 (0.87 to 1.237)	5705 (1995 to 11235)	0.821	1.01 (0.875 to 1.103)	5305 (2956 to 10170)	0.838	0.751 (0.673 to 0.835)	5288 (3874 to 7202)	0.00138
ENSG00000035687	ADSS	A_23_P201432	1.126 (1.059 to 1.254)	4796 (2445 to 9021)	0.0027	0.828 (0.735 to 0.916)	3353 (1266 to 5734)	0.00236	1.004 (0.858 to 1.186)	4010 (2532 to 6466)	0.934	0.962 (0.858 to 1.106)	4947 (3610 to 5507)	0.536
ENSG00000035720	STAP1	A_23_P7185	0.929 (0.631 to 1.243)	139.9 (44.3 to 339.2)	0.441	1.009 (0.804 to 1.212)	134 (44.83 to 279.7)	0.903	0.828 (0.587 to 1.093)	110.5 (61.61 to 210.7)	0.0495	1.672 (0.89 to 3.106)	293.3 (139.7 to 472.2)	0.00737
ENSG00000035862	TIMP2	A_23_P107401	0.818 (0.763 to 0.86)	781.6 (661.5 to 868.6)	0.000475	1.069 (0.939 to 1.308)	1104 (750 to 1320)	0.206	1.85 (1.651 to 2.227)	2008 (1282 to 2413)	1.45e-09	5.202 (3.739 to 8.789)	8280 (7747 to 9823)	3.86e-08
ENSG00000035928	RFC1	A_23_P18465, A_24_P136807	1.012 (0.913 to 1.152).1.066 (0.837 to 1.428)	1630 (977.7 to 3091).3724 (2314 to 6260)	0.5255	1.026 (0.96 to 1.118).1.2 (0.902 to 1.507)	1576 (896.4 to 2350).4362 (1714 to 6813)	0.27605	0.888 (0.725 to 1.12).1.014 (0.886 to 1.162)	1603 (1197 to 2394).3256 (2095 to 5940)	0.429	0.696 (0.395 to 0.987).0.773 (0.68 to 0.86)	1599 (1267 to 2062).3482 (2228 to 5260)	0.014005
ENSG00000036054	TBC1D23	A_23_P121489, A_23_P212728	0.981 (0.835 to 1.094).1.029 (0.987 to 1.102)	1061 (600.5 to 1883).499.8 (277.6 to 804.8)	0.4875	1.171 (1.092 to 1.371).1.21 (0.994 to 1.484)	1229 (492 to 2048).661 (241.4 to 1129)	0.00304	0.897 (0.797 to 1.006).0.987 (0.858 to 1.185)	467.4 (258.9 to 852.9).996.8 (665.2 to 1524)	0.4198	0.747 (0.416 to 1.091).1.048 (0.745 to 1.564)	1418 (1027 to 1850).531.4 (293.5 to 803)	0.3616
ENSG00000036257	CUL3	A_24_P140030	1.034 (0.889 to 1.156)	137.9 (70.29 to 273.1)	0.537	1.184 (0.964 to 1.472)	163.1 (65.91 to 326.1)	0.0188	0.833 (0.704 to 0.958)	105.2 (79.99 to 157.4)	0.0117	0.965 (0.73 to 1.191)	175.5 (133.2 to 237.2)	0.688
ENSG00000036448	MYOM2	A_23_P258912	0.941 (0.78 to 1.248)	58.84 (30.34 to 93.38)	0.548	2.44 (1.738 to 4.772)	193.5 (57.15 to 355)	7.03e-06	1.221 (0.633 to 2.817)	86.5 (45.58 to 146.2)	0.221	0.735 (0.452 to 1.086)	77.37 (38.94 to 106.4)	0.0498
ENSG00000036549	ZZZ3	A_23_P11507	1.026 (0.727 to 1.204)	619.6 (330.9 to 1197)	0.372	0.86 (0.631 to 1.083)	550.2 (319.9 to 1103)	0.00379	0.982 (0.649 to 1.211)	596.4 (416.5 to 1237)	0.69	1.112 (0.736 to 1.363)	922.8 (548.4 to 1203)	0.0571
ENSG00000037042	TUBG2	A_23_P78014	1.213 (1.065 to 1.371)	422.7 (221.9 to 796.9)	3.63e-05	0.933 (0.807 to 1.127)	352.6 (136.8 to 701.5)	0.26	0.944 (0.81 to 1.122)	313.4 (183.4 to 616.1)	0.28	0.696 (0.453 to 1.013)	332.2 (192.1 to 522.7)	0.0124
ENSG00000037241	RPL26L1	A_24_P106306, A_32_P205550, A_32_P205553	0.955 (0.874 to 1.023).0.959 (0.903 to 1.034).1.007 (0.933 to 1.052)	24164 (14698 to 40337).24208 (14540 to 39894).8689 (5430 to 16070)	0.362	1.045 (0.985 to 1.12).1.076 (1.002 to 1.151).1.199 (1.034 to 1.341)	11522 (5409 to 21536).28362 (16478 to 51599).30639 (14923 to 53839)	0.106282	0.825 (0.728 to 0.912).1.034 (0.961 to 1.199).1.056 (1.003 to 1.112)	26711 (16231 to 44270).26854 (17407 to 43264).7467 (4703 to 13352)	0.17972	0.503 (0.444 to 0.558).0.922 (0.81 to 1.053).0.951 (0.812 to 1.12)	33436 (27372 to 37788).34631 (29937 to 42612).5747 (5132 to 6857)	0.223669
ENSG00000037280	FLT4	A_23_P213394	0.856 (0.443 to 1.098)	82.76 (48.25 to 167.7)	0.203	1.064 (0.833 to 1.457)	96.5 (51.5 to 184.5)	0.421	1.062 (0.812 to 1.587)	89.99 (45.03 to 201.9)	0.519	1.357 (0.962 to 2.369)	176.4 (90 to 372.9)	0.024
ENSG00000037474	NSUN2	A_23_P7423	1.058 (0.999 to 1.131)	13687 (7634 to 24843)	0.0661	0.975 (0.874 to 1.077)	13251 (5891 to 22625)	0.559	0.777 (0.678 to 0.851)	9992 (5904 to 18153)	0.000159	0.552 (0.514 to 0.589)	8933 (6861 to 10522)	8.11e-06
ENSG00000037637	FBXO42	A_24_P333494	0.93 (0.867 to 0.988)	1533 (809.1 to 2940)	0.0242	1.015 (0.926 to 1.092)	1779 (569.3 to 3515)	0.7	1.08 (1.017 to 1.192)	1828 (905.1 to 3982)	0.0582	1.159 (1.073 to 1.268)	2425 (2141 to 3144)	0.00852
ENSG00000037749	MFAP3	A_23_P167711, A_24_P217758, A_32_P161934	0.86 (0.741 to 1.035).0.942 (0.561 to 1.594).0.972 (0.925 to 1.026)	28.85 (17.13 to 51.83).303.2 (152.1 to 601.2).44.31 (21.82 to 86.63)	0.439667	0.947 (0.735 to 1.17).0.997 (0.576 to 1.52).1.064 (0.941 to 1.163)	317.2 (149.5 to 567.3).44.58 (11.58 to 90.13).53.96 (28.9 to 94.12)	0.577333	0.977 (0.868 to 1.155).1.217 (0.796 to 1.849).1.548 (0.625 to 2.591)	289.7 (201.1 to 466.3).33.35 (17.87 to 55.6).97.3 (41.54 to 224.6)	0.294633	0.964 (0.776 to 1.142).1.025 (0.953 to 1.097).2.111 (1.339 to 2.613)	148.7 (95.64 to 233.4).423.1 (376.1 to 475.6).46.27 (36.5 to 57.9)	0.455001
ENSG00000037757	MRI1	A_24_P279797	1.183 (1.121 to 1.248)	1618 (839 to 3031)	0.000233	0.927 (0.872 to 0.994)	1312 (555 to 2349)	0.0897	0.961 (0.881 to 1.005)	1270 (655.7 to 2565)	0.312	0.778 (0.648 to 0.877)	1330 (858.6 to 1621)	0.00408
ENSG00000037897	METTL1	A_23_P47788, A_23_P47790	1.085 (1.041 to 1.139).1.175 (1.091 to 1.239)	2126 (1239 to 3781).3534 (2227 to 6530)	0.0164255	0.847 (0.798 to 0.902).0.88 (0.828 to 0.935)	1726 (647 to 3439).2836 (1484 to 4877)	0.007725	0.98 (0.939 to 1.027).0.982 (0.929 to 1.097)	1816 (1017 to 3806).3252 (2063 to 5565)	0.622	0.615 (0.537 to 0.697).0.618 (0.524 to 0.735)	1431 (1027 to 1841).2614 (1947 to 3136)	6.305e-05
ENSG00000038002	AGA	A_23_P7099	0.996 (0.982 to 1.02)	1228 (787 to 2086)	0.897	1.153 (1.054 to 1.298)	1445 (797.4 to 2290)	0.0026	1.006 (0.945 to 1.041)	1239 (1021 to 1708)	0.856	0.823 (0.746 to 0.992)	1363 (1293 to 1522)	0.0178
ENSG00000038210	PI4K2B	A_23_P18598	1.02 (0.958 to 1.078)	1469 (858.5 to 2828)	0.481	1.024 (0.918 to 1.124)	1491 (832.4 to 2523)	0.577	0.87 (0.724 to 1.081)	1187 (951.6 to 1715)	0.0331	0.556 (0.457 to 0.647)	1064 (812.2 to 1259)	3.02e-05
ENSG00000038219	BOD1L1	A_23_P359052, A_23_P429689, A_24_P231057, A_24_P264928, A_24_P931476	0.971 (0.873 to 1.039).0.998 (0.92 to 1.089).1.141 (0.919 to 1.459).1.161 (0.969 to 1.309).1.173 (0.809 to 1.481)	175 (109 to 267).195.9 (123.8 to 248.5).1088 (639.7 to 2129).492.1 (246.7 to 892.7).695.6 (416 to 1289)	0.28773	0.892 (0.749 to 1.158).0.9 (0.591 to 1.13).0.995 (0.841 to 1.157).1.032 (0.896 to 1.229).1.1 (0.798 to 1.476)	174.6 (59.3 to 264.5).1037 (445.3 to 1703).206.4 (141.4 to 266.7).516.7 (207.8 to 1146).545.4 (267.3 to 662.8)	0.4362	0.662 (0.596 to 0.706).0.711 (0.633 to 0.815).0.774 (0.55 to 0.989).0.88 (0.674 to 1.011).1.043 (0.915 to 1.15)	113.6 (52.13 to 197.4).135.3 (102.2 to 186.3).407.4 (228.2 to 604.9).513.6 (341.3 to 1042).883.7 (575.7 to 1262)	0.0831239	0.583 (0.253 to 1.187).0.728 (0.376 to 1.056).0.78 (0.386 to 1.224).1.049 (0.97 to 1.136).1.106 (0.984 to 1.476)	165.3 (71.16 to 252).1495 (1180 to 1832).218.1 (84.21 to 304.4).675.1 (349.3 to 1007).742.2 (482.9 to 1101)	0.15836
ENSG00000038274	MAT2B	A_23_P81408, A_24_P243347	1.039 (0.996 to 1.106).1.069 (0.887 to 1.259)	1537 (944.3 to 2411).7193 (4027 to 13107)	0.1755	0.875 (0.835 to 0.891).0.984 (0.758 to 1.252)	1597 (675.5 to 2826).6665 (2715 to 12457)	0.416445	1.069 (1.021 to 1.103).1.153 (0.93 to 1.343)	1630 (984.2 to 2573).7498 (4640 to 14573)	0.0393	1.026 (0.94 to 1.112).1.098 (0.813 to 1.909)	2105 (1646 to 3075).9210 (7748 to 11918)	0.552
ENSG00000038358	EDC4	A_24_P399009	1.101 (0.998 to 1.158)	388.4 (193.1 to 721.1)	0.0138	0.722 (0.628 to 0.87)	258.5 (121.5 to 465.5)	0.000121	0.866 (0.694 to 1.142)	279.9 (164.4 to 486.6)	0.0739	0.857 (0.596 to 1.057)	398.7 (276.1 to 555.5)	0.154
ENSG00000038382	TRIO	A_23_P425880, A_24_P913431	0.874 (0.829 to 1).0.979 (0.78 to 1.192)	243.2 (179.3 to 364.5).285.1 (145.3 to 446.7)	0.349635	0.718 (0.63 to 0.893).0.783 (0.499 to 1.092)	201.4 (118.1 to 267.6).227 (110.1 to 312.4)	0.0224984	0.952 (0.776 to 1.192).0.981 (0.772 to 1.078)	257.9 (180 to 308.8).285 (161.3 to 395.8)	0.5765	1.259 (0.769 to 1.744).1.395 (1.173 to 1.609)	556.5 (408.6 to 688.8).589.3 (317.2 to 1026)	0.037864
ENSG00000038427	VCAN	A_23_P144959	0.856 (0.662 to 1.022)	46.11 (23.98 to 70.95)	0.164	1.086 (0.839 to 1.46)	47.72 (27.09 to 96.89)	0.434	0.932 (0.725 to 1.441)	59.34 (19.51 to 103.8)	0.585	1.132 (0.836 to 1.766)	96.97 (39.74 to 125.7)	0.265
ENSG00000038532	CLEC16A	A_32_P194246	0.958 (0.914 to 1.001)	1465 (713.5 to 2917)	0.228	0.866 (0.818 to 0.911)	1365 (427.6 to 2787)	0.00616	1.041 (0.91 to 1.239)	1495 (895.1 to 3014)	0.441	1.084 (0.917 to 1.209)	1959 (1399 to 2240)	0.175
ENSG00000039123	SKIV2L2	A_23_P110661	1.067 (1.036 to 1.115)	4754 (2822 to 8721)	0.0604	0.955 (0.9 to 1.022)	4492 (1760 to 8362)	0.264	0.921 (0.855 to 1.008)	4082 (2592 to 7735)	0.0691	0.658 (0.638 to 0.673)	3781 (3390 to 4693)	5.46e-05
ENSG00000039319	ZFYVE16	A_24_P286054	0.764 (0.408 to 1.072)	44.9 (24.01 to 76.12)	0.0912	1.218 (0.887 to 1.78)	66.15 (30.41 to 115.3)	0.0692	1.318 (0.921 to 1.886)	52.96 (34.06 to 89.04)	0.0277	1.07 (0.526 to 1.994)	72.44 (41.6 to 107.8)	0.668
ENSG00000039523	FAM65A	A_32_P230868	0.944 (0.829 to 1.103)	1755 (1423 to 2093)	0.2	0.93 (0.831 to 1.094)	1912 (1518 to 2875)	0.178	1.154 (0.963 to 1.353)	2207 (1658 to 3149)	0.0135	1.94 (1.68 to 2.294)	5304 (3852 to 6635)	9.87e-09
ENSG00000039650	PNKP	A_23_P164883	0.979 (0.946 to 1.048)	448.5 (224.2 to 905.8)	0.519	0.897 (0.845 to 0.974)	421 (163.4 to 872.1)	0.0269	1.115 (1.033 to 1.221)	486.8 (241.6 to 1092)	0.00918	1.118 (1.08 to 1.184)	622.2 (409.3 to 911.2)	0.0304
ENSG00000039987	BEST2	A_23_P16225	0.924 (0.553 to 1.127)	71.14 (42.16 to 166.2)	0.454	1.035 (0.847 to 1.351)	79.52 (37.49 to 150.3)	0.706	1.103 (0.827 to 1.389)	70.72 (41.13 to 134.5)	0.28	0.971 (0.881 to 1.153)	94.57 (56.84 to 132.4)	0.702
ENSG00000040199	PHLPP2	A_23_P418234	1.238 (0.988 to 1.87)	52 (21.72 to 119.8)	0.143	1.259 (0.978 to 1.579)	56.01 (25.23 to 108.9)	0.0439	0.742 (0.543 to 1.557)	29.98 (13.52 to 66.18)	0.156	0.512 (0.334 to 0.697)	29.79 (20.14 to 41.17)	0.0021
ENSG00000040275	SPDL1	A_23_P41948	1.057 (0.812 to 1.345)	1164 (594.5 to 2458)	0.0531	1.188 (0.899 to 1.618)	1449 (610.8 to 3173)	0.000262	1.042 (0.797 to 1.334)	1127 (694.1 to 2396)	0.232	0.863 (0.688 to 1.275)	1229 (862.4 to 1806)	0.0268
ENSG00000040341	STAU2	A_23_P33154, A_24_P374634, A_32_P649	1.018 (0.9 to 1.15).1.023 (0.936 to 1.106).1.091 (1.012 to 1.153)	105.8 (87.71 to 135.9).507.6 (288.6 to 921.9).585.9 (332.2 to 981.6)	0.400123	0.548 (0.397 to 0.855).0.92 (0.777 to 1.196).0.956 (0.799 to 1.07)	517.7 (236 to 706.6).545.2 (256.2 to 1028).79.08 (39.87 to 218.6)	0.191719	0.992 (0.885 to 1.098).1.116 (1.019 to 1.273).1.3 (1.037 to 1.733)	149.9 (111.7 to 199.5).547.8 (279.1 to 820.4).574.6 (402.8 to 981)	0.2914	0.847 (0.599 to 1.051).0.907 (0.768 to 1.016).1.393 (1.078 to 1.945)	258.5 (114.6 to 414.4).625.6 (552.8 to 736.9).670.6 (412.3 to 1018)	0.0877167
ENSG00000040531	CTNS	A_23_P427075	0.918 (0.633 to 1.012)	230.5 (118.4 to 485.2)	0.19	0.901 (0.774 to 1.022)	213.5 (83.04 to 386.8)	0.0637	1.086 (1.007 to 1.158)	252.5 (141.5 to 458.9)	0.0512	1.117 (1.026 to 1.187)	351.5 (265.3 to 412.3)	0.0463
ENSG00000040608	RTN4R	A_23_P132175	1.089 (0.992 to 1.148)	330.6 (93.5 to 793.2)	0.0421	0.706 (0.614 to 0.846)	195.6 (50.28 to 484.2)	0.000213	0.607 (0.569 to 0.644)	165.1 (50.58 to 460.5)	1.57e-05	0.892 (0.579 to 1.288)	261.7 (198.9 to 408.8)	0.35
ENSG00000040633	PHF23	A_23_P38482, A_24_P5550	1.044 (0.991 to 1.085).1.279 (1.066 to 1.7)	171.5 (91.05 to 373.4).1343 (628 to 2727)	0.086972	0.748 (0.678 to 0.869).0.836 (0.759 to 1.041)	105.7 (49.35 to 190.4).952.5 (427.5 to 1832)	0.007817	1.068 (1.009 to 1.18).1.083 (0.973 to 1.257)	148.1 (81.17 to 277.9).1326 (700.8 to 2664)	0.12155	1.088 (0.916 to 1.49).1.105 (0.928 to 1.232)	1677 (1324 to 2346).217.3 (155.2 to 332.4)	0.2095
ENSG00000040933	INPP4A	A_23_P393531	0.903 (0.642 to 1.149)	152.3 (106 to 271.8)	0.146	0.676 (0.615 to 0.716)	109.6 (58.62 to 169.8)	1.64e-05	1.208 (1.009 to 1.408)	185.9 (134.8 to 269.4)	0.00164	1.116 (0.955 to 1.239)	232.6 (189.6 to 297.1)	0.0844
ENSG00000041357	PSMA4	A_24_P124992	1.119 (1.057 to 1.219)	14862 (8525 to 28013)	0.00265	1.001 (0.975 to 1.022)	14920 (6269 to 29823)	0.972	0.847 (0.77 to 0.921)	11654 (6677 to 25252)	0.00233	0.628 (0.507 to 0.738)	10992 (8783 to 15197)	0.000197
ENSG00000041802	LSG1	A_23_P132417, A_24_P148653, A_24_P148657	0.989 (0.934 to 1.015).1.033 (0.874 to 1.136).1.269 (1.192 to 1.319)	166.8 (68.14 to 278.9).1127 (666.4 to 2127).2230 (1172 to 4142)	0.389342	1.093 (1.008 to 1.208).1.232 (1.178 to 1.319).1.34 (1.207 to 1.52)	177.8 (60.11 to 290.3).1116 (502.2 to 1776).3301 (1352 to 6241)	0.0219025	0.778 (0.722 to 0.871).0.889 (0.778 to 1.043).0.948 (0.857 to 1.023)	128 (60.77 to 214.6).2066 (1386 to 3417).697 (368.3 to 1098)	0.095782	0.564 (0.438 to 0.66).0.574 (0.418 to 0.746).0.852 (0.711 to 0.94)	143.1 (103.1 to 201.2).2480 (1995 to 2807).710 (494.4 to 1019)	0.012388
ENSG00000041880	PARP3	A_23_P92073	0.887 (0.791 to 1.045)	102.7 (49.66 to 209.5)	0.102	1.112 (0.824 to 1.416)	140.7 (40.17 to 247.9)	0.195	1.096 (0.87 to 1.371)	139.2 (66.29 to 264.9)	0.232	1.113 (1.021 to 1.173)	160.4 (94.02 to 202)	0.0729
ENSG00000041988	THAP3	A_23_P340890, A_32_P140289	0.987 (0.912 to 1.048).1.001 (0.953 to 1.044)	218.5 (104.7 to 461.6).787 (447.5 to 1397)	0.84	0.902 (0.747 to 1.102).0.962 (0.865 to 1.106)	189.3 (79.09 to 359.9).780 (377.4 to 1396)	0.2855	1.111 (1.023 to 1.201).1.216 (1.056 to 1.453)	246.6 (116.8 to 475.6).978.5 (497.1 to 1986)	0.0120335	1.027 (0.94 to 1.128).1.116 (0.928 to 1.408)	1163 (979.2 to 1292).287 (223.5 to 331.8)	0.3875
ENSG00000042088	TDP1	A_23_P117623	1.056 (0.993 to 1.097)	6288 (3528 to 11815)	0.0854	0.776 (0.706 to 0.86)	4715 (2021 to 8405)	0.000183	1.065 (1.026 to 1.128)	6319 (4242 to 12005)	0.0846	0.745 (0.645 to 0.83)	5524 (4452 to 6147)	0.00134
ENSG00000042286	AIFM2	A_23_P138567	1.027 (0.926 to 1.095)	172.9 (127.6 to 239.8)	0.484	1.135 (1.046 to 1.275)	226.2 (149.6 to 326.6)	0.00646	0.929 (0.833 to 1.1)	172.2 (120.4 to 252.1)	0.178	0.684 (0.588 to 0.785)	180.2 (127.1 to 232.8)	0.000462
ENSG00000042317	SPATA7	A_32_P34387	0.965 (0.71 to 1.075)	189.4 (111.7 to 332)	0.526	1.093 (0.985 to 1.263)	244.7 (103.8 to 423.3)	0.0759	1.018 (0.894 to 1.162)	200.5 (130.7 to 356.7)	0.727	0.866 (0.6 to 1.058)	246.6 (176.1 to 292.6)	0.13
ENSG00000042429	MED17	A_23_P116025, A_24_P218587	0.976 (0.903 to 1.032).1.007 (0.959 to 1.11)	426.5 (248.9 to 782.9).938.1 (540.2 to 1537)	0.622	0.841 (0.719 to 0.934).1.004 (0.827 to 1.222)	394.3 (168.4 to 763.1).969.6 (524.3 to 1521)	0.47238	0.889 (0.78 to 0.959).0.971 (0.87 to 1.062)	381.2 (257.4 to 767.8).903 (626 to 1392)	0.2556	0.989 (0.844 to 1.217).1.197 (1.027 to 1.344)	1211 (935.3 to 1556).701.9 (533.6 to 841.8)	0.438495
ENSG00000042445	RETSAT	A_23_P209944	1.107 (0.926 to 1.522)	314.9 (170 to 603.7)	0.136	0.809 (0.674 to 0.938)	212.1 (125.6 to 295.6)	0.00274	1.015 (0.792 to 1.219)	264.9 (206.1 to 339.3)	0.82	1.229 (0.975 to 1.715)	475.4 (404.6 to 519.1)	0.0296
ENSG00000042493	CAPG	A_23_P165636	0.893 (0.87 to 0.906)	7985 (4497 to 14187)	0.00483	1.121 (1.066 to 1.223)	11614 (5424 to 22959)	0.00593	2.857 (2.531 to 3.344)	30979 (17168 to 67380)	2.41e-12	4.044 (3.016 to 5.028)	57016 (42513 to 82154)	1.16e-09
ENSG00000042753	AP2S1	A_24_P113295	0.915 (0.862 to 0.998)	1695 (951.9 to 3125)	0.0184	1.029 (0.863 to 1.126)	2027 (761.3 to 4133)	0.567	0.949 (0.732 to 1.099)	1757 (1031 to 3751)	0.434	1.031 (0.9 to 1.129)	2439 (2040 to 3064)	0.604
ENSG00000043093	DCUN1D1	A_23_P144145, A_24_P166012	0.94 (0.901 to 0.998).0.996 (0.777 to 1.33)	1329 (740.4 to 2380).60.32 (42.29 to 88.3)	0.5022	0.975 (0.644 to 1.267).1.125 (0.964 to 1.244)	1756 (580.9 to 3637).60.19 (28.2 to 85.04)	0.41085	1.012 (0.898 to 1.109).1.199 (1.124 to 1.285)	1723 (870 to 3368).62.55 (41.55 to 78.25)	0.438518	0.917 (0.739 to 1.116).1.183 (0.956 to 1.648)	2133 (1774 to 2459).82.97 (73.42 to 97.89)	0.2007
ENSG00000043143	PHF15	A_23_P156198, A_23_P416434, A_24_P226278	1 (0.934 to 1.135).1.023 (0.913 to 1.157).1.072 (0.784 to 1.352)	121.3 (71.07 to 219.9).139 (75.11 to 268.1).51.64 (24.53 to 101.1)	0.733333	0.761 (0.507 to 1.355).0.923 (0.729 to 1.049).0.995 (0.804 to 1.191)	125.1 (46.19 to 196.5).129.3 (48.26 to 225.7).34.66 (22.51 to 45.33)	0.423	0.969 (0.836 to 1.036).1.014 (0.879 to 1.244).1.108 (0.897 to 1.353)	128.8 (69.6 to 213.5).143.7 (63.63 to 289).46.53 (27.89 to 75.77)	0.587667	0.861 (0.749 to 1.046).0.911 (0.717 to 1.163).0.914 (0.769 to 1.06)	166.4 (127.4 to 224.9).166.6 (136.8 to 213.4).60.22 (48.9 to 73.16)	0.224
ENSG00000043462	LCP2	A_23_P30547	0.95 (0.9 to 1.004)	1544 (914.7 to 2815)	0.0951	1.123 (0.945 to 1.309)	1819 (1028 to 2464)	0.0329	1.479 (1.244 to 1.738)	2514 (2004 to 3359)	7.74e-07	2.942 (2.742 to 3.314)	7225 (6361 to 8274)	1.73e-13
ENSG00000043514	TRIT1	A_23_P12062	1.049 (1.011 to 1.079)	1784 (931.1 to 3341)	0.116	1.011 (0.962 to 1.071)	1876 (766.3 to 3436)	0.778	0.833 (0.764 to 0.937)	1398 (799.6 to 2775)	0.00175	0.487 (0.428 to 0.537)	1026 (754.3 to 1362)	4.2e-06
ENSG00000044090	CUL7	A_23_P19348	0.988 (0.843 to 1.101)	108.8 (55.78 to 224.8)	0.851	0.835 (0.698 to 0.95)	84.41 (32.14 to 138.6)	0.0254	1.096 (0.926 to 1.212)	106.8 (49.02 to 218)	0.181	1.291 (1.15 to 1.457)	182 (131.3 to 277.3)	0.000237
ENSG00000044446	PHKA2	A_23_P159671	0.982 (0.944 to 1.015)	3053 (1696 to 6057)	0.522	0.92 (0.837 to 1.001)	2843 (1013 to 5079)	0.0769	1.127 (1.043 to 1.216)	3362 (1936 to 6527)	0.00264	1.137 (1.026 to 1.216)	4211 (3287 to 4815)	0.0175
ENSG00000044459	CNTLN	A_32_P95082	1.057 (0.983 to 1.25)	268.7 (143.2 to 447.3)	0.186	1.154 (0.951 to 1.491)	301 (137.4 to 460)	0.028	0.931 (0.786 to 1.122)	255.9 (122.3 to 447.1)	0.219	0.95 (0.43 to 1.638)	373.8 (153 to 608.3)	0.788
ENSG00000044574	HSPA5	A_24_P18190, A_24_P98411	0.797 (0.765 to 0.846).0.952 (0.812 to 1.21)	1961 (815.7 to 3756).3353 (2144 to 5473)	0.188003	1.208 (1.144 to 1.265).1.41 (0.978 to 1.743)	4048 (1342 to 8852).4491 (2273 to 6197)	0.0005725	0.605 (0.496 to 0.778).0.738 (0.534 to 0.908)	1385 (928.9 to 2715).2737 (1530 to 4259)	0.0013421	0.955 (0.918 to 1.048).1.37 (1.262 to 1.513)	3904 (2982 to 4698).4638 (3112 to 6479)	0.211504
ENSG00000046647	GEMIN8	A_24_P156576	1.129 (1.019 to 1.276)	415.3 (244.6 to 865.4)	0.00235	0.857 (0.766 to 0.949)	321.2 (161.1 to 593.8)	0.006	0.93 (0.839 to 0.996)	353.5 (199.3 to 650.3)	0.111	0.628 (0.562 to 0.759)	325.3 (264.8 to 360.3)	0.000117
ENSG00000046651	OFD1	A_23_P254226, A_24_P134653	0.96 (0.927 to 0.973).1.134 (0.999 to 1.259)	1260 (819.8 to 2291).235.6 (117.6 to 410.1)	0.094805	0.827 (0.684 to 0.988).0.874 (0.741 to 0.993)	178.9 (63.22 to 247.9).1120 (718.9 to 1564)	0.01459	0.876 (0.816 to 1.001).1.082 (1.033 to 1.126)	187 (95.64 to 277.1).1392 (971.2 to 2018)	0.02495	0.893 (0.809 to 1.079).1.029 (0.779 to 1.204)	1822 (1321 to 2177).262.1 (160.4 to 413.9)	0.4225
ENSG00000047056	WDR37	A_23_P47073	0.952 (0.897 to 1.022)	746.1 (350.2 to 1542)	0.103	1.018 (0.761 to 1.202)	713.9 (341 to 1200)	0.804	1.201 (0.974 to 1.347)	864.3 (558.7 to 1416)	0.0032	2.231 (1.982 to 2.451)	2148 (1840 to 2641)	5.64e-12
ENSG00000047188	YTHDC2	A_23_P41732, A_24_P178106	1.061 (0.952 to 1.278).1.253 (0.716 to 1.775)	141 (71.81 to 274).89.11 (48.81 to 147.6)	0.17365	0.94 (0.784 to 1.155).1.285 (0.856 to 1.731)	124.6 (49.23 to 194.4).97.21 (37.43 to 166.6)	0.18985	1.017 (0.786 to 1.723).1.034 (0.923 to 1.211)	131.1 (82.38 to 252.7).59.26 (32.83 to 103.9)	0.7305	0.571 (0.274 to 0.884).0.571 (0.486 to 0.648)	109.5 (90.29 to 127.6).63.35 (38.66 to 103.3)	0.00389475
ENSG00000047230	CTPS2	A_23_P10305	1.076 (0.93 to 1.323)	178.6 (133.5 to 257.9)	0.136	0.813 (0.656 to 1.022)	138.2 (83.4 to 222.9)	0.0146	1.075 (0.957 to 1.25)	175.3 (133.5 to 253.8)	0.164	0.656 (0.524 to 0.794)	160.9 (132.9 to 200.4)	0.000484
ENSG00000047249	ATP6V1H	A_23_P157478, A_24_P363679	0.962 (0.912 to 1.022).1.012 (0.906 to 1.139)	176.9 (116.6 to 264.3).1986 (1309 to 2943)	0.4765	0.914 (0.793 to 1.195).1.048 (0.966 to 1.206)	171 (107.8 to 235.5).2385 (1398 to 3883)	0.224	0.978 (0.824 to 1.149).1.066 (0.975 to 1.19)	178.3 (138.1 to 252.2).2278 (1733 to 3815)	0.397	1.174 (1.015 to 1.336).1.445 (1.222 to 1.637)	314.6 (244.7 to 414).4055 (2917 to 5448)	0.00630149
ENSG00000047315	POLR2B	A_23_P144311	1.025 (0.935 to 1.142)	2887 (1822 to 5394)	0.457	1.001 (0.899 to 1.054)	2798 (1667 to 4097)	0.975	0.956 (0.863 to 1.103)	2657 (1904 to 3611)	0.35	1.062 (0.911 to 1.378)	3995 (3520 to 4476)	0.42
ENSG00000047346	FAM214A	A_23_P99853, A_24_P357576	0.928 (0.866 to 1.037).0.972 (0.929 to 0.995)	338.3 (178 to 615.5).395.4 (215.2 to 710.3)	0.1875	1.016 (0.895 to 1.176).1.061 (0.933 to 1.212)	369.5 (139.3 to 547.7).434.2 (169.9 to 707)	0.4895	1.249 (1 to 1.45).1.342 (1.142 to 1.473)	443.5 (268.9 to 779.3).522.1 (314.8 to 953)	0.00034926	1.415 (1.184 to 1.651).1.523 (1.365 to 1.781)	723 (582.4 to 904.9).793 (687.2 to 882.6)	6.9565e-06
ENSG00000047365	ARAP2	A_32_P83784	0.836 (0.556 to 0.999)	129.7 (83.67 to 187.3)	0.0292	0.831 (0.623 to 1.165)	132.2 (84.33 to 163.7)	0.0714	1.029 (0.6 to 1.523)	162.1 (116.7 to 190.6)	0.81	1.13 (0.879 to 1.674)	265.2 (192.2 to 317.6)	0.178
ENSG00000047410	TPR	A_23_P45875, A_24_P179611	1.051 (1.026 to 1.077).1.076 (0.914 to 1.274)	6793 (4002 to 11689).8749 (4588 to 16927)	0.0951	0.984 (0.817 to 1.099).1.063 (0.795 to 1.239)	7056 (2702 to 11647).8228 (3233 to 15346)	0.5895	0.847 (0.673 to 1.042).0.942 (0.793 to 1.116)	5420 (3342 to 9492).7495 (4936 to 13510)	0.1627	0.787 (0.553 to 0.963).0.907 (0.883 to 0.931)	6594 (4923 to 9100).9284 (7205 to 10597)	0.0684
ENSG00000047578	KIAA0556	A_23_P381203	1.052 (0.708 to 1.552)	79.95 (47.3 to 141.9)	0.636	0.891 (0.532 to 1.109)	70.69 (29.74 to 102.6)	0.298	0.89 (0.694 to 1.054)	72.45 (50.04 to 116.6)	0.182	1.13 (1.047 to 1.324)	119 (81.23 to 151.7)	0.0686
ENSG00000047579	DTNBP1	A_23_P42435, A_24_P145316	0.948 (0.921 to 0.976).0.988 (0.949 to 1.055)	2641 (1334 to 4954).325.5 (163.7 to 680.1)	0.3832	0.905 (0.698 to 1.328).0.906 (0.698 to 1.072)	2713 (1167 to 5372).307 (78.32 to 536.9)	0.2175	1.002 (0.78 to 1.205).1.015 (0.844 to 1.209)	2722 (1913 to 4515).306.8 (174.7 to 549.9)	0.883	1.223 (1.061 to 1.342).1.647 (1.134 to 2.084)	4411 (3746 to 5010).765.7 (422.9 to 1227)	0.00088965
ENSG00000047597	XK	A_23_P45304	0.825 (0.635 to 1.029)	86.27 (24.47 to 198.1)	0.0837	1.042 (0.736 to 1.877)	154.4 (35.48 to 477.7)	0.743	1.634 (1.332 to 2.173)	168.3 (78.82 to 385.5)	1e-05	2.056 (1.664 to 2.683)	267.6 (182.9 to 377.9)	2.45e-07
ENSG00000047621	C12orf4	A_23_P25433, A_24_P184535	0.967 (0.913 to 1.004).0.97 (0.871 to 1.08)	1667 (1016 to 3206).747 (479.3 to 1298)	0.3095	1.098 (0.842 to 1.281).1.165 (1.006 to 1.294)	2087 (994.9 to 3825).839.7 (440.5 to 1274)	0.065265	1.042 (0.957 to 1.156).1.063 (0.941 to 1.155)	1846 (1173 to 3276).834.5 (604.4 to 1216)	0.2375	1.045 (0.986 to 1.157).1.369 (1.126 to 1.615)	1152 (897.8 to 1342).3169 (2583 to 3683)	0.209036
ENSG00000047644	WWC3	A_23_P34176, A_23_P345650	0.833 (0.717 to 0.904).0.837 (0.768 to 0.95)	152.5 (118.2 to 207.7).864.7 (836.2 to 899.3)	0.000625	1.227 (1.051 to 1.402).1.248 (1.094 to 1.374)	186.5 (88.52 to 223).1359 (833.4 to 1568)	0.00025255	1.152 (1.024 to 1.316).1.184 (0.954 to 2.191)	185 (119.2 to 247.4).1239 (789.4 to 1534)	0.05733	1.889 (1.272 to 3.236).2.205 (1.654 to 3.649)	3322 (2996 to 3590).480.1 (446.7 to 505.4)	6.195e-05
ENSG00000047849	MAP4	A_23_P211814, A_23_P211816	1.119 (1.101 to 1.154).1.137 (1.091 to 1.18)	1232 (645.5 to 2301).308.9 (197.5 to 556.7)	0.003095	0.794 (0.719 to 0.87).0.902 (0.834 to 0.975)	1015 (398 to 1796).214.5 (134.3 to 298.4)	0.0149315	0.794 (0.632 to 0.995).0.876 (0.773 to 0.963)	214.4 (149.4 to 285.4).920.6 (547 to 1625)	0.00746	0.508 (0.358 to 0.661).0.606 (0.454 to 0.75)	201.5 (138.9 to 276.5).877 (502.8 to 1115)	0.00017015
ENSG00000047932	GOPC	A_23_P336040, A_23_P58877	1.118 (1.085 to 1.16).1.167 (1.096 to 1.264)	336.1 (220.8 to 576.8).4375 (2667 to 8118)	0.00127	0.755 (0.704 to 0.83).0.967 (0.888 to 1.062)	240 (89.11 to 461.5).3850 (1976 to 6471)	0.220547	0.979 (0.864 to 1.115).1.023 (0.93 to 1.105)	296.6 (168.3 to 563.9).3920 (2535 to 6176)	0.6095	0.586 (0.467 to 0.719).0.873 (0.642 to 1.111)	239.8 (194.9 to 274.9).4463 (3162 to 5386)	0.0845382
ENSG00000048028	USP28	A_23_P203075	1.095 (0.979 to 1.336)	131.2 (87.06 to 219.1)	0.0809	0.726 (0.621 to 0.829)	85.46 (46.02 to 116.4)	0.00104	1.19 (1.112 to 1.312)	145.9 (92.81 to 214.1)	0.00293	0.889 (0.746 to 1.027)	162.8 (81.16 to 270.4)	0.146
ENSG00000048162	NOP16	A_23_P144726	1.147 (1.119 to 1.176)	43764 (23497 to 82971)	0.0038	0.799 (0.776 to 0.857)	37655 (16978 to 73916)	0.00263	0.84 (0.774 to 0.936)	36269 (19983 to 73613)	0.00589	0.404 (0.355 to 0.493)	23114 (18474 to 25688)	3.22e-05
ENSG00000048392	RRM2B	A_23_P20225	0.962 (0.892 to 1.093)	169.6 (108.4 to 285.9)	0.342	0.983 (0.758 to 1.129)	181.3 (97.37 to 318.3)	0.802	0.868 (0.761 to 1.07)	174.3 (122.4 to 298.9)	0.0308	0.861 (0.63 to 1.276)	224.6 (151.9 to 323.9)	0.181
ENSG00000048405	ZNF800	A_23_P419192	1.094 (0.996 to 1.209)	302 (145.8 to 508.6)	0.0206	0.861 (0.582 to 1.114)	228 (107.8 to 271.4)	0.136	0.688 (0.615 to 0.766)	184.5 (107.4 to 272)	1.52e-05	0.808 (0.518 to 1.112)	325.7 (219.3 to 510.4)	0.0993
ENSG00000048471	SNX29	A_23_P367816, A_32_P120604	0.825 (0.477 to 1.023).0.857 (0.791 to 0.953)	449.7 (251.8 to 725.4).88.06 (49.85 to 166.9)	0.0420935	0.762 (0.431 to 1.158).0.982 (0.854 to 1.137)	557 (294.5 to 886.6).73.76 (32.7 to 113.8)	0.3953	0.761 (0.39 to 1.151).1.125 (0.922 to 1.431)	587.5 (416.9 to 885.3).80.16 (50.14 to 107.2)	0.08355	1.703 (1.327 to 2.489).2.174 (1.859 to 2.879)	1320 (948.8 to 1699).312.5 (166.7 to 488.8)	3.31569e-05
ENSG00000048544	MRPS10	A_23_P70417, A_24_P209285, A_24_P283294	1.024 (0.974 to 1.096).1.051 (0.897 to 1.164).1.093 (1.032 to 1.177)	1628 (952.5 to 3180).786.5 (566 to 1206).7766 (4279 to 15090)	0.2056	0.937 (0.842 to 1.067).1.031 (0.974 to 1.078).1.051 (0.993 to 1.133)	1521 (702.9 to 2988).812 (475.6 to 1209).8139 (2785 to 16733)	0.263	0.815 (0.748 to 0.903).0.931 (0.872 to 1.004).0.97 (0.895 to 1.035)	1340 (858.3 to 2381).636.1 (388.3 to 1055).7107 (3812 to 14267)	0.177315	0.482 (0.403 to 0.572).0.553 (0.479 to 0.616).0.773 (0.706 to 0.842)	1060 (801.4 to 1273).520.3 (376.7 to 685.2).6664 (5236 to 7843)	0.000610733
ENSG00000048649	RSF1	A_23_P139388, A_23_P395703, A_24_P246717	1.003 (0.911 to 1.067).1.031 (0.99 to 1.084).1.146 (0.998 to 1.384)	2344 (1442 to 3241).394.7 (211.3 to 647.1).512.5 (323 to 812.4)	0.4061	1.011 (0.841 to 1.175).1.057 (0.854 to 1.251).1.108 (0.905 to 1.361)	2525 (1295 to 3564).365.5 (115.6 to 515.1).558.2 (253.5 to 830.6)	0.433633	0.88 (0.721 to 1.173).0.92 (0.845 to 1.038).1.034 (0.833 to 1.255)	2195 (1383 to 3375).313.7 (165.7 to 456.5).514.4 (377.9 to 750.3)	0.2445	0.808 (0.733 to 0.947).0.902 (0.695 to 1.135).0.956 (0.635 to 1.246)	3246 (1323 to 4803).476.5 (338.3 to 714.8).584.4 (468.3 to 686)	0.297247
ENSG00000048707	VPS13D	A_23_P251216, A_23_P364837, A_32_P20582	0.936 (0.874 to 1.046).0.95 (0.863 to 1.061).0.955 (0.627 to 1.211)	159.7 (58.72 to 310).299.1 (129 to 573.4).49.59 (22.29 to 83.14)	0.371	0.806 (0.567 to 1.235).0.896 (0.738 to 1.036).1.182 (0.73 to 1.586)	191.8 (54.87 to 310.2).261.4 (117.1 to 426.7).34.38 (21.6 to 54.54)	0.115	1.006 (0.721 to 1.299).1.118 (0.957 to 1.371).1.209 (0.844 to 1.955)	148.6 (69.9 to 253.2).322.3 (162.2 to 530.2).40.59 (29.65 to 62.05)	0.394267	0.877 (0.58 to 1.209).1.075 (0.906 to 1.172).1.181 (0.519 to 2.575)	266.2 (111.4 to 361.1).342.3 (226.6 to 455.7).76.72 (57.7 to 95.67)	0.291333
ENSG00000048740	CELF2	A_23_P115645, A_23_P202071	0.954 (0.814 to 1.042).0.984 (0.957 to 1.029)	5842 (3228 to 10433).919 (535.7 to 1656)	0.3975	1.067 (1 to 1.126).1.15 (1.053 to 1.304)	1044 (424.7 to 1684).7143 (3199 to 12060)	0.046435	0.988 (0.806 to 1.158).1.207 (1.043 to 1.317)	6891 (5254 to 10523).920.6 (700.1 to 1303)	0.418071	0.819 (0.752 to 0.952).0.981 (0.772 to 1.267)	1240 (740.9 to 1521).6102 (5208 to 6847)	0.40825
ENSG00000048828	FAM120A	A_23_P32294, A_24_P138022, A_24_P290764, A_24_P941505	1.016 (0.756 to 1.14).1.103 (1.019 to 1.21).1.19 (1.119 to 1.307).1.306 (1.132 to 1.405)	1651 (707.5 to 3114).1819 (985.6 to 3576).209.7 (128.8 to 379.7).2712 (1252 to 5037)	0.194554	0.687 (0.624 to 0.757).0.942 (0.786 to 1.16).1.032 (0.865 to 1.228).1.053 (0.914 to 1.221)	138.7 (56.42 to 252.1).1210 (755 to 1669).1440 (403.4 to 2433).2427 (1071 to 3575)	0.294256	0.955 (0.878 to 1.052).0.977 (0.831 to 1.133).0.982 (0.929 to 1.079).1.027 (0.985 to 1.073)	1296 (1057 to 1898).1300 (560.3 to 2455).208.9 (145.3 to 406.6).2344 (1136 to 3615)	0.5215	0.677 (0.61 to 0.785).0.71 (0.481 to 0.931).0.772 (0.526 to 0.995).0.876 (0.647 to 1.015)	181.7 (116.9 to 211.8).1310 (841.4 to 2102).1569 (1082 to 1996).2580 (1683 to 4108)	0.0440075
ENSG00000048991	R3HDM1	A_23_P380998	1.054 (0.996 to 1.087)	1865 (952.5 to 3592)	0.123	0.915 (0.836 to 1.088)	1604 (672.8 to 2836)	0.107	0.947 (0.778 to 1.201)	1564 (1090 to 2888)	0.403	0.764 (0.64 to 0.873)	1683 (1444 to 1865)	0.00285
ENSG00000049089	COL9A2	A_23_P45786	0.859 (0.801 to 0.931)	73.02 (47.97 to 131.5)	0.0313	1.105 (0.817 to 1.628)	93.38 (59.76 to 138.1)	0.278	1.623 (1.33 to 2.009)	127.8 (102.8 to 179.3)	4.03e-06	3.805 (3.273 to 4.751)	614.3 (487.3 to 865.5)	4.02e-12
ENSG00000049167	ERCC8	A_23_P58521, A_24_P324986	1.132 (0.995 to 1.342).1.191 (0.853 to 1.38)	123.8 (61.92 to 226.3).85.7 (40.91 to 169.9)	0.0672	0.95 (0.805 to 1.332).1.014 (0.841 to 1.285)	107 (56.64 to 172.9).87.62 (25.63 to 196.2)	0.72	0.985 (0.926 to 1.096).1.003 (0.83 to 1.241)	68.89 (43.1 to 148).96.78 (73.47 to 157.2)	0.8855	0.529 (0.418 to 0.683).0.608 (0.445 to 0.707)	54.74 (36.64 to 75.54).81.78 (64.31 to 88.73)	0.0001915
ENSG00000049239	H6PD	A_23_P114707	0.956 (0.83 to 1.04)	129.8 (69.97 to 263.3)	0.363	0.989 (0.915 to 1.098)	154.2 (66.29 to 263.2)	0.82	1.076 (0.927 to 1.333)	150.5 (78.2 to 318.1)	0.229	1.368 (1.003 to 2.315)	294.4 (153 to 541.7)	0.0175
ENSG00000049245	VAMP3	A_23_P97532, A_24_P370887	1.03 (0.845 to 1.157).1.033 (0.958 to 1.067)	237.1 (155.8 to 371.6).283.4 (167.4 to 441.8)	0.4095	0.889 (0.719 to 1.137).0.927 (0.807 to 1.001)	218.4 (88.78 to 366.7).260.5 (163.3 to 416.1)	0.11645	0.906 (0.77 to 1.119).0.965 (0.851 to 1.133)	201.7 (146.8 to 345).255.7 (185.6 to 428.6)	0.29265	1.242 (1.041 to 1.716).2.006 (1.885 to 2.342)	405.8 (328.6 to 544.9).731.4 (603 to 924.9)	0.0073
ENSG00000049283	EPN3	A_24_P102343	0.922 (0.76 to 1.088)	58.44 (33.68 to 98.36)	0.362	0.909 (0.691 to 1.177)	67.9 (42.81 to 105.5)	0.272	1.132 (0.895 to 2.357)	57.87 (37.72 to 91.94)	0.366	1.141 (0.777 to 1.968)	101.7 (60.24 to 149.7)	0.29
ENSG00000049449	RCN1	A_23_P13222, A_23_P203299, A_24_P110914, A_24_P143758	0.893 (0.829 to 1.005).0.924 (0.744 to 1.09).0.931 (0.874 to 1.006).0.963 (0.844 to 1.212)	213.1 (166.7 to 249.6).273.9 (186.3 to 446.5).544.3 (269.9 to 1069).623.7 (512.9 to 885.1)	0.1483	0.945 (0.837 to 1.022).1 (0.933 to 1.068).1.111 (0.896 to 1.324).1.151 (0.968 to 1.525)	270.2 (160 to 396.2).278.9 (141 to 544.6).601.4 (378.1 to 1151).767.4 (535 to 1073)	0.345	1.04 (0.887 to 1.167).1.063 (0.845 to 1.35).1.123 (1.011 to 1.271).1.241 (0.924 to 1.678)	264.2 (160.5 to 323).311.1 (143.8 to 547.2).627.8 (269.3 to 1326).865.6 (680.4 to 1291)	0.19145	0.793 (0.507 to 1.27).1.061 (0.905 to 1.173).1.29 (1.037 to 1.586).1.351 (1.113 to 1.591)	1062 (788 to 1236).270 (200.7 to 341.7).539.6 (354.1 to 807.3).969.9 (749.1 to 1212)	0.102989
ENSG00000049540	ELN	A_24_P186943	0.955 (0.889 to 1.047)	235.2 (147.4 to 394.9)	0.187	1.099 (0.985 to 1.354)	272.1 (135.2 to 525.5)	0.0719	0.98 (0.902 to 1.042)	277.3 (103.2 to 546.2)	0.649	1.029 (0.91 to 1.273)	383.8 (189.8 to 561.1)	0.665
ENSG00000049541	RFC2	A_23_P93823, A_32_P235753	1.018 (0.927 to 1.242).1.021 (0.964 to 1.134)	2529 (1651 to 4064).69.43 (37.01 to 130.4)	0.6455	1.013 (0.886 to 1.238).1.052 (0.818 to 1.359)	2806 (1361 to 5223).80.85 (25.7 to 172.6)	0.71	1.043 (0.911 to 1.203).1.237 (0.971 to 1.653)	2574 (1587 to 4761).99.76 (39.17 to 217.5)	0.18825	0.63 (0.457 to 0.788).0.866 (0.579 to 1.124)	2014 (1511 to 2410).93.41 (69.53 to 131)	0.0942855
ENSG00000049618	ARID1B	A_23_P70701, A_24_P366735	0.978 (0.862 to 1.073).1.03 (0.921 to 1.191)	653.9 (488.2 to 956.6).734.9 (408.7 to 1406)	0.468	0.97 (0.783 to 1.141).1.07 (1.011 to 1.135)	740.1 (498.4 to 1092).747.4 (262.2 to 1339)	0.3418	0.913 (0.807 to 1.042).1.013 (0.862 to 1.097)	571.8 (339.7 to 902.3).726.3 (446.3 to 1356)	0.42	0.92 (0.763 to 1.067).0.975 (0.836 to 1.179)	863 (606.3 to 1147).874.5 (535.8 to 1102)	0.47
ENSG00000049656	CLPTM1L	A_23_P110504	1.182 (1.108 to 1.329)	7942 (3806 to 16806)	0.000174	0.964 (0.941 to 0.995)	6207 (3330 to 10819)	0.343	0.88 (0.814 to 0.994)	5422 (3902 to 9334)	0.0162	0.84 (0.668 to 0.975)	6575 (5093 to 8121)	0.0406
ENSG00000049769	PPP1R3F	A_23_P125533	0.952 (0.902 to 1.024)	815 (541.2 to 1356)	0.111	1.078 (0.884 to 1.201)	1029 (562.5 to 1801)	0.142	1.121 (1.025 to 1.228)	993.3 (646.6 to 1697)	0.00677	1.027 (0.906 to 1.219)	1174 (840.8 to 1415)	0.681
ENSG00000049860	HEXB	A_23_P156049	1.011 (0.902 to 1.114)	718.1 (368.9 to 1329)	0.721	0.881 (0.837 to 0.952)	642.4 (406.4 to 967.5)	0.00959	1.178 (1.093 to 1.232)	842.4 (642.2 to 1222)	8.47e-05	2.983 (2.591 to 3.377)	3040 (2311 to 4035)	5.9e-13
ENSG00000049883	PTCD2	A_23_P121939	1.137 (0.994 to 1.294)	243.2 (126.5 to 453.1)	0.0054	1.233 (0.994 to 1.596)	272.3 (94.39 to 448.5)	0.00324	0.805 (0.553 to 1.023)	175.9 (100.4 to 247.6)	0.0421	0.632 (0.496 to 0.823)	214.1 (111.5 to 335.3)	0.000645
ENSG00000050130	JKAMP	A_23_P205584, A_23_P380965	0.945 (0.859 to 1.037).0.975 (0.86 to 1.059)	124.4 (72.76 to 232.9).2470 (1557 to 3937)	0.346	0.827 (0.661 to 0.999).1.115 (0.985 to 1.241)	147.4 (41.28 to 298.1).2362 (1078 to 4210)	0.03957	0.99 (0.824 to 1.198).1.047 (0.969 to 1.105)	127.7 (78.57 to 254.5).2681 (1842 to 4730)	0.545	1.017 (0.775 to 1.421).1.251 (1.166 to 1.407)	171.2 (132.2 to 230).4175 (3266 to 5187)	0.431614
ENSG00000050344	NFE2L3	A_23_P42718	1.672 (1.628 to 1.708)	832.6 (538.9 to 1329)	8.62e-07	0.747 (0.55 to 0.97)	386.1 (225.5 to 612.7)	0.00409	0.936 (0.872 to 1.03)	458.8 (339.7 to 759.4)	0.225	0.305 (0.266 to 0.342)	222.6 (187.8 to 263.5)	0.000989
ENSG00000050393	MCUR1	A_23_P256618	1.069 (1.03 to 1.107)	1446 (1007 to 2464)	0.0322	1.029 (0.987 to 1.133)	1407 (730.4 to 2274)	0.465	0.813 (0.75 to 0.858)	1117 (788 to 1712)	0.000289	0.517 (0.434 to 0.583)	952.6 (766.7 to 1190)	1.29e-05
ENSG00000050405	LIMA1	A_23_P151267	1.123 (1.034 to 1.225)	907.7 (573.9 to 1558)	0.00677	0.764 (0.718 to 0.821)	717.5 (318.2 to 1285)	0.000456	1.151 (1.078 to 1.265)	956.8 (631.6 to 1853)	0.00155	0.737 (0.674 to 0.842)	796.9 (646.1 to 1074)	0.000674
ENSG00000050426	LETMD1	A_23_P117037	1.024 (0.949 to 1.15)	2869 (1471 to 5696)	0.445	0.928 (0.736 to 1.097)	2414 (1155 to 3959)	0.253	1.355 (1.167 to 1.464)	3660 (2145 to 7526)	1.29e-06	1.467 (1.279 to 1.833)	5021 (3538 to 7216)	3.04e-05
ENSG00000050748	MAPK9	A_23_P167692	1.117 (0.97 to 1.371)	184.2 (109.2 to 317.5)	0.0596	0.817 (0.66 to 1.171)	139.4 (71.36 to 228.3)	0.0178	1.182 (0.938 to 1.383)	190.4 (134.6 to 297.6)	0.0206	1.172 (0.855 to 1.741)	271 (224.5 to 360)	0.14
ENSG00000050767	COL23A1	A_23_P387031	0.939 (0.885 to 1.025)	3153 (2038 to 5760)	0.0764	0.873 (0.788 to 0.999)	2912 (1534 to 4279)	0.0121	1.119 (0.974 to 1.216)	3584 (2541 to 5142)	0.012	1.885 (1.706 to 2.033)	8399 (6602 to 9625)	3.89e-11
ENSG00000050820	BCAR1	A_23_P66319	0.969 (0.795 to 1.092)	78.12 (42.4 to 147.2)	0.655	1.027 (0.963 to 1.091)	89.96 (52.12 to 156.2)	0.635	1.12 (0.948 to 1.566)	82.06 (43.82 to 130.9)	0.2	1.261 (1.058 to 1.749)	164.8 (91.37 to 258.4)	0.0125
ENSG00000051009	FAM160A2	A_23_P24796	0.959 (0.928 to 1.015)	1962 (680 to 4463)	0.164	1.101 (0.97 to 1.313)	2242 (506.2 to 5186)	0.0741	1.031 (0.989 to 1.08)	1972 (735 to 4873)	0.389	1.659 (1.504 to 1.773)	3635 (2655 to 5176)	9.88e-10
ENSG00000051108	HERPUD1	A_23_P54846	0.979 (0.929 to 1.042)	11140 (4770 to 23218)	0.454	1.777 (1.678 to 1.831)	21334 (9777 to 44728)	5.52e-14	0.598 (0.537 to 0.715)	6718 (3954 to 13164)	1.47e-06	0.556 (0.532 to 0.597)	7874 (5397 to 10355)	8.62e-06
ENSG00000051128	HOMER3	A_23_P39364	0.902 (0.787 to 1.011)	843.2 (538.8 to 1118)	0.019	1.001 (0.849 to 1.22)	884.7 (698.2 to 1418)	0.983	1.498 (1.312 to 1.813)	1460 (721.6 to 1811)	1.85e-07	5.782 (4.274 to 6.95)	9003 (3942 to 17285)	1.3e-10
ENSG00000051180	RAD51	A_23_P88731	1.01 (0.977 to 1.058)	9228 (6302 to 15528)	0.711	0.98 (0.853 to 1.057)	9746 (5208 to 17935)	0.651	1.014 (0.947 to 1.095)	9398 (6589 to 17132)	0.693	0.706 (0.567 to 0.843)	8515 (6990 to 9734)	0.00137
ENSG00000051341	POLQ	A_23_P218827	1.065 (0.942 to 1.197)	1775 (885.2 to 3528)	0.101	1.157 (1.043 to 1.385)	1851 (694.4 to 2858)	0.00843	1.064 (0.889 to 1.275)	1644 (1112 to 2008)	0.271	0.827 (0.666 to 1)	1859 (1324 to 2848)	0.029
ENSG00000051382	PIK3CB	A_23_P346969	1.081 (0.833 to 1.447)	178.3 (107.1 to 310.5)	0.294	0.815 (0.707 to 0.915)	144.3 (65.28 to 230.5)	0.00296	1.004 (0.914 to 1.174)	171.1 (125.4 to 245.3)	0.938	1.146 (0.849 to 1.635)	279 (229.5 to 365.5)	0.146
ENSG00000051523	CYBA	A_23_P163506	0.9 (0.877 to 0.961)	3523 (1975 to 5940)	0.0144	1.114 (1.027 to 1.202)	4828 (2283 to 8516)	0.00921	1.336 (1.035 to 1.54)	5574 (3066 to 11015)	0.000271	2.103 (1.705 to 2.681)	10701 (9010 to 12282)	1.09e-07
ENSG00000051596	THOC3	A_32_P41405	1.094 (1.039 to 1.158)	22671 (11695 to 44183)	0.00674	0.968 (0.908 to 1.073)	21610 (8892 to 40434)	0.445	0.975 (0.931 to 1.01)	20743 (11453 to 42398)	0.482	0.711 (0.614 to 0.789)	20120 (15379 to 25162)	0.000667
ENSG00000051620	HEBP2	A_23_P19691	1.035 (1.005 to 1.069)	8774 (4590 to 16504)	0.223	0.99 (0.959 to 1.033)	9035 (3014 to 17405)	0.785	1.007 (0.993 to 1.049)	8525 (4673 to 16682)	0.835	0.77 (0.686 to 0.85)	7871 (5915 to 9467)	0.0024
ENSG00000051825	MPHOSPH9	A_23_P13657, A_24_P398500	1.091 (0.928 to 1.194).1.185 (0.991 to 1.409)	345.8 (204.3 to 650.4).353.8 (216.1 to 685.6)	0.020405	0.814 (0.684 to 0.927).0.862 (0.804 to 0.962)	237 (113 to 348.6).250.8 (125 to 384.4)	0.005035	1.029 (0.995 to 1.084).1.092 (0.992 to 1.138)	304.5 (227.2 to 458.9).315.3 (189.2 to 522.3)	0.23655	0.784 (0.703 to 0.918).0.892 (0.786 to 1.003)	337.4 (247.9 to 429.7).361.9 (273.1 to 437)	0.05129
ENSG00000052126	PLEKHA5	A_24_P41170	1.312 (1.138 to 1.512)	198 (112.8 to 326.7)	9.74e-06	0.953 (0.783 to 1.155)	147.9 (67.84 to 207.5)	0.441	0.879 (0.762 to 1.01)	144.9 (67.71 to 237.1)	0.0461	0.744 (0.53 to 0.935)	163.9 (107.8 to 253.8)	0.0114
ENSG00000052344	PRSS8	A_24_P150803	0.939 (0.79 to 1.107)	150.7 (86.37 to 256.7)	0.223	0.994 (0.861 to 1.151)	171.2 (99.71 to 331.9)	0.906	1.043 (0.952 to 1.223)	177.7 (68.29 to 344.2)	0.438	1.19 (1.009 to 1.507)	307.1 (151.6 to 508.6)	0.0249
ENSG00000052723	SIKE1	A_23_P85990, A_24_P937855	1.019 (0.879 to 1.124).1.047 (0.819 to 1.218)	392.2 (173.1 to 761.9).99.09 (73.98 to 141.3)	0.578	0.924 (0.739 to 1.16).1.095 (0.962 to 1.298)	429.6 (151.7 to 674.9).98.83 (47.53 to 146.9)	0.1885	0.913 (0.765 to 1.241).1.01 (0.799 to 1.316)	361.7 (229.3 to 566.3).99.37 (59.57 to 145.4)	0.5265	0.564 (0.399 to 0.716).0.837 (0.687 to 1.177)	407.3 (318.9 to 473.2).80.17 (54.98 to 98.77)	0.047915
ENSG00000052749	RRP12	A_23_P24192	1.028 (0.994 to 1.066)	1551 (910 to 2917)	0.344	0.942 (0.839 to 1.035)	1359 (674 to 2049)	0.189	0.753 (0.646 to 0.835)	1068 (672 to 1537)	8.33e-05	0.517 (0.454 to 0.585)	1025 (814.3 to 1238)	6.81e-06
ENSG00000052795	FNIP2	A_23_P400580, A_32_P190737	0.913 (0.752 to 1.007).0.978 (0.957 to 1.008)	162.9 (103.5 to 282.9).325.7 (181.5 to 578.2)	0.2552	1.063 (0.782 to 1.216).1.119 (0.968 to 1.269)	202.8 (99.95 to 337).376.2 (180.3 to 595)	0.1761	1.042 (0.93 to 1.214).1.047 (0.834 to 1.4)	175.5 (128.1 to 288.9).315.1 (223.4 to 509.4)	0.463	2.057 (1.548 to 3.176).2.33 (1.756 to 2.948)	1014 (765.4 to 1240).530.6 (388.4 to 715.8)	3.1104e-06
ENSG00000052802	MSMO1	A_23_P110184	1.08 (0.907 to 1.355)	195 (109.1 to 396.5)	0.15	0.604 (0.534 to 0.651)	101.9 (51.34 to 151.3)	4.83e-06	1.164 (0.955 to 1.425)	176 (102.2 to 229.9)	0.0288	1.347 (1.091 to 1.565)	307.9 (230.9 to 359.9)	0.000299
ENSG00000052841	TTC17	A_23_P414895, A_23_P414899, A_23_P64247	1.112 (0.941 to 1.37).1.139 (0.992 to 1.393).1.165 (1.036 to 1.456)	279.2 (147.1 to 602.5).293.9 (101.2 to 744.3).342.5 (199 to 611.7)	0.0285233	0.732 (0.577 to 0.917).0.797 (0.613 to 1.019).0.813 (0.639 to 1.039)	167.6 (65.67 to 242.5).218.3 (144.6 to 354.4).220.2 (120.6 to 317.4)	0.00815333	0.845 (0.749 to 0.957).0.87 (0.77 to 0.938).0.983 (0.843 to 1.13)	182.6 (76.77 to 282.9).225.7 (115.7 to 451.7).284.4 (193.8 to 439.5)	0.251107	0.807 (0.698 to 0.936).0.843 (0.63 to 1.031).0.926 (0.598 to 1.303)	270.9 (212.8 to 317).278.8 (199.6 to 394.5).330.1 (253.7 to 407.4)	0.18894
ENSG00000053254	FOXN3	A_23_P140405, A_23_P88435	0.971 (0.942 to 1.016).0.999 (0.839 to 1.165)	244.9 (134.9 to 479.8).6454 (3876 to 12840)	0.6175	0.791 (0.612 to 0.937).0.876 (0.605 to 1.07)	179.1 (77.67 to 296.9).5560 (3374 to 7492)	0.076635	0.962 (0.832 to 1.077).1.032 (0.909 to 1.136)	210 (128.3 to 353.2).6865 (4508 to 11337)	0.463	1.891 (1.593 to 2.413).1.937 (1.805 to 2.076)	16352 (13807 to 18425).561.7 (395.9 to 780.1)	9.95011e-08
ENSG00000053371	AKR7A2	A_23_P115356	0.953 (0.92 to 0.983)	5943 (3062 to 11490)	0.178	1.02 (0.962 to 1.076)	6916 (2682 to 14237)	0.599	1.202 (1.153 to 1.268)	7639 (4642 to 16607)	6.21e-05	1.354 (1.135 to 1.779)	11364 (7768 to 18073)	0.00128
ENSG00000053372	MRTO4	A_23_P35099	1.152 (0.994 to 1.264)	7260 (3069 to 12938)	0.00119	0.839 (0.66 to 1.052)	5549 (2374 to 10521)	0.0236	0.707 (0.516 to 1.052)	4732 (1970 to 11099)	0.0044	0.391 (0.357 to 0.435)	2971 (1982 to 3615)	1.6e-06
ENSG00000053501	USE1	A_23_P79122, A_24_P393303	1.005 (0.977 to 1.051).1.09 (0.944 to 1.185)	1849 (1208 to 3054).335 (205.7 to 523.4)	0.4428	1.045 (0.989 to 1.118).1.057 (1.028 to 1.11)	2009 (970.5 to 3102).354.1 (179.3 to 549.8)	0.185	0.929 (0.904 to 0.961).0.992 (0.908 to 1.062)	1855 (1138 to 3120).294.2 (173.6 to 521.6)	0.45525	0.646 (0.537 to 0.749).0.649 (0.596 to 0.728)	1579 (1273 to 1879).279.9 (192.6 to 364.8)	9.9e-05
ENSG00000053770	AP5M1	A_23_P37265, A_24_P153754, A_24_P33652	1.005 (0.93 to 1.069).1.057 (0.896 to 1.267).1.155 (0.876 to 1.712)	1949 (1355 to 3284).258.8 (159.4 to 446.3).74.1 (42.19 to 131.1)	0.438	1.014 (0.727 to 1.593).1.049 (1.017 to 1.141).1.105 (0.906 to 1.494)	2226 (1209 to 3635).322.1 (136.1 to 608.3).87.93 (33.95 to 164.5)	0.436333	1.036 (0.995 to 1.105).1.05 (0.813 to 1.283).1.079 (0.929 to 1.265)	251.6 (141.6 to 373.6).2056 (1363 to 3738).76.7 (43.31 to 127.9)	0.339333	0.759 (0.483 to 1.277).0.851 (0.485 to 1.31).0.925 (0.832 to 1.007)	2408 (1702 to 3040).328.7 (227.4 to 476.2).86.83 (63.64 to 128.1)	0.169433
ENSG00000053900	ANAPC4	A_23_P317800	1.012 (0.974 to 1.052)	6562 (3659 to 12034)	0.652	0.934 (0.875 to 1.007)	6374 (2608 to 11769)	0.117	1.021 (1.011 to 1.051)	6565 (3850 to 11751)	0.528	0.943 (0.787 to 1.012)	7643 (6401 to 8918)	0.366
ENSG00000054116	TRAPPC3	A_23_P200535	1.067 (0.974 to 1.281)	2610 (1489 to 4853)	0.118	0.966 (0.846 to 1.235)	2497 (1208 to 4718)	0.583	1.019 (0.83 to 1.234)	2416 (1542 to 4509)	0.733	1.042 (0.81 to 1.6)	3225 (2548 to 4696)	0.692
ENSG00000054118	THRAP3	A_23_P160367, A_24_P256863, A_24_P926367	0.975 (0.683 to 1.202).0.984 (0.946 to 1.023).1.201 (0.887 to 1.413)	11474 (5675 to 23218).210.6 (117.8 to 383.3).217.1 (153.9 to 295.3)	0.4271	1.044 (0.981 to 1.122).1.054 (0.79 to 1.282).1.088 (0.89 to 1.251)	12785 (5111 to 24131).207.5 (101.5 to 324.1).216.8 (98.32 to 358.1)	0.302667	0.854 (0.715 to 1.002).0.877 (0.772 to 0.992).0.969 (0.879 to 1.086)	11506 (5951 to 21027).164.9 (97.88 to 261.6).175 (99.57 to 276.5)	0.1709	0.686 (0.6 to 0.754).0.724 (0.491 to 1.099).0.993 (0.879 to 1.096)	14450 (9848 to 16962).191.9 (115.1 to 256.1).208.6 (114.7 to 327.6)	0.307342
ENSG00000054148	PHPT1	A_23_P83192, A_24_P184031	0.974 (0.95 to 1.003).1.002 (0.975 to 1.037)	11498 (7306 to 19618).15916 (9803 to 28232)	0.626	1.048 (0.973 to 1.142).1.05 (0.976 to 1.098)	13680 (6607 to 23688).17359 (9234 to 29802)	0.215	0.936 (0.892 to 0.981).0.988 (0.969 to 1.008)	11102 (7278 to 17240).16276 (10379 to 27739)	0.40795	0.956 (0.878 to 1.098).0.959 (0.886 to 1.075)	14630 (12607 to 16386).21149 (18572 to 24339)	0.4715
ENSG00000054179	ENTPD2	A_23_P395365	0.953 (0.883 to 1.02)	329.5 (195.5 to 535.2)	0.137	0.979 (0.927 to 1.038)	354.4 (216.6 to 586.5)	0.599	1.103 (1.061 to 1.145)	441.3 (255.6 to 697.8)	0.00927	1.46 (1.225 to 1.703)	770.5 (608 to 881.6)	1.36e-05
ENSG00000054219	LY75	A_23_P131435, A_23_P334173	0.986 (0.891 to 1.109).1.007 (0.945 to 1.091)	194.7 (106.6 to 346.4).1055 (823.7 to 1480)	0.7605	0.772 (0.668 to 0.877).0.943 (0.839 to 1)	164 (76.94 to 288.9).1083 (658.8 to 1692)	0.0992665	0.997 (0.844 to 1.15).1.908 (1.606 to 2.231)	1069 (859.1 to 1733).380.9 (276.5 to 685.6)	0.474	1.122 (1.062 to 1.214).3.463 (2.579 to 4.52)	1728 (1187 to 2330).950.7 (757.9 to 1338)	0.01505
ENSG00000054267	ARID4B	A_23_P201951, A_23_P436476, A_24_P225308, A_24_P418086	0.851 (0.789 to 0.906).0.909 (0.808 to 1.019).0.998 (0.942 to 1.058).1.061 (0.916 to 1.18)	413 (218.1 to 816).598.5 (358.1 to 1034).5199 (3094 to 9495).604 (342.2 to 1082)	0.277075	1.02 (0.98 to 1.104).1.094 (0.96 to 1.445).1.111 (0.99 to 1.238).1.139 (1.007 to 1.326)	490.3 (170.9 to 837.9).5519 (2111 to 9979).647.4 (331 to 1110).879 (436.7 to 1496)	0.209725	1.004 (0.979 to 1.032).1.042 (0.875 to 1.219).1.181 (0.958 to 1.417).1.212 (1.04 to 1.457)	516.9 (289.8 to 869.8).577.7 (370.3 to 866.7).5056 (3206 to 8861).852.5 (609.6 to 1565)	0.338385	0.742 (0.606 to 1.029).0.804 (0.778 to 0.849).1.485 (1.133 to 2.237).1.551 (1.291 to 1.857)	1391 (1019 to 2035).4857 (4168 to 5468).582 (479.6 to 673.6).874.1 (661.9 to 940.6)	0.00374071
ENSG00000054282	SDCCAG8	A_23_P34546, A_23_P34548, A_24_P179489	0.975 (0.934 to 1.019).1.01 (0.782 to 1.323).1.02 (0.943 to 1.102)	259.6 (179.5 to 415.7).268.4 (167.4 to 370.2).94.67 (62.65 to 141)	0.612667	0.578 (0.452 to 0.77).0.634 (0.551 to 0.665).0.929 (0.771 to 1.103)	159.8 (76.52 to 276.2).298.4 (142.4 to 406.8).53.75 (26.69 to 68.47)	0.0613713	1.097 (1.001 to 1.248).1.129 (0.905 to 1.359).1.221 (1.055 to 1.443)	101.6 (66.69 to 192.8).310.2 (202.3 to 585.6).341.8 (229 to 430.2)	0.0473333	1.812 (1.552 to 2.359).1.885 (1.557 to 2.309).1.917 (1.468 to 2.682)	232.3 (145.1 to 324.7).687.7 (619.4 to 819.4).840.5 (504.2 to 1088)	1.99147e-06
ENSG00000054356	PTPRN	A_23_P90722	1.072 (0.758 to 1.378)	85.28 (51.43 to 148.2)	0.443	1.009 (0.753 to 1.416)	79.72 (50.42 to 133.7)	0.926	1.022 (0.807 to 1.322)	75.52 (57.59 to 118.9)	0.814	1.004 (0.725 to 1.513)	102.2 (72.43 to 150)	0.972
ENSG00000054523	KIF1B	A_23_P201287, A_24_P649624	0.863 (0.686 to 1.208).0.913 (0.764 to 1.186)	81.74 (60.78 to 133.9).86.95 (52.65 to 143.5)	0.1687	1.007 (0.737 to 1.503).1.478 (1.033 to 2.418)	149.9 (87 to 241.8).94.13 (45.17 to 156.9)	0.471065	1.143 (0.736 to 1.8).1.185 (0.936 to 1.595)	117.5 (87.98 to 167.9).122 (88.58 to 183.4)	0.12425	1.016 (0.879 to 1.163).1.528 (1.32 to 1.847)	155.4 (113.8 to 201.5).238.9 (194.7 to 268.1)	0.406002
ENSG00000054598	FOXC1	A_23_P390504, A_32_P205110	0.529 (0.383 to 0.65).0.773 (0.634 to 0.971)	137.8 (77.2 to 245.2).55.54 (40.84 to 86.37)	0.00790126	0.991 (0.842 to 1.152).1.509 (1.093 to 2.126)	398.9 (149.2 to 662).74.25 (53.99 to 106.1)	0.450655	1.601 (1.131 to 2.106).2.762 (2.014 to 3.796)	118 (67.44 to 212.5).811.9 (483.1 to 1495)	7.65471e-05	12.25 (9.338 to 16.21).5.262 (3.27 to 8.237)	676.4 (476.9 to 852.7).6234 (4242 to 7887)	7.10339e-09
ENSG00000054611	TBC1D22A	A_23_P109593, A_32_P10633	0.929 (0.83 to 1.035).1.024 (0.975 to 1.096)	1186 (628.6 to 2206).971.3 (521.4 to 1815)	0.2254	0.984 (0.853 to 1.126).0.994 (0.868 to 1.134)	1116 (415.5 to 1941).1180 (369.8 to 2583)	0.824	0.908 (0.832 to 1).0.954 (0.856 to 1.095)	1002 (509.4 to 2210).1039 (522.7 to 2123)	0.17515	1.017 (0.95 to 1.106).1.149 (1.062 to 1.236)	1474 (1212 to 2179).1531 (1143 to 2109)	0.3851
ENSG00000054967	RELT	A_23_P47735, A_24_P38951	0.747 (0.707 to 0.799).0.772 (0.703 to 0.906)	3700 (2079 to 6638).436.1 (222.5 to 838.8)	9.4315e-06	1.317 (1.181 to 1.474).1.371 (1.207 to 1.697)	754.8 (276.9 to 1428).7284 (3663 to 12161)	2.069e-05	1.229 (1.094 to 1.39).1.279 (1.189 to 1.392)	6726 (4277 to 11093).714.1 (351.4 to 1476)	2.5e-05	1.866 (1.497 to 2.238).2.211 (1.928 to 2.543)	15082 (11418 to 19321).1529 (1129 to 2421)	7.28915e-08
ENSG00000054983	GALC	A_23_P25964	0.982 (0.896 to 1.15)	455.2 (185.3 to 891.9)	0.625	0.754 (0.662 to 0.892)	389.9 (145.2 to 794.2)	0.000179	1.42 (1.193 to 1.792)	643.8 (428.1 to 1327)	2.47e-05	3.208 (2.962 to 3.662)	1827 (1142 to 2503)	3.24e-14
ENSG00000055044	NOP58	A_23_P154447	0.942 (0.849 to 1.025)	38579 (21432 to 73150)	0.0922	1.124 (1.018 to 1.239)	50197 (19486 to 95346)	0.00745	0.778 (0.728 to 0.826)	35568 (18054 to 78229)	4.54e-05	0.422 (0.257 to 0.563)	25313 (17501 to 32390)	0.000145
ENSG00000055070	SZRD1	A_23_P115105, A_24_P405054	0.933 (0.814 to 1.09).0.96 (0.906 to 1.043)	313.4 (203 to 544.3).3683 (1871 to 7283)	0.154	0.957 (0.835 to 1.103).1.006 (0.82 to 1.284)	373.9 (223.1 to 583.7).3970 (1715 to 7609)	0.6595	0.864 (0.726 to 1.034).1.178 (1.009 to 1.275)	307.1 (202.1 to 449.1).4485 (2490 to 8197)	0.01316	0.718 (0.562 to 1.063).1.067 (0.897 to 1.214)	375.6 (281.8 to 461.5).4785 (3773 to 5559)	0.16685
ENSG00000055118	KCNH2	A_23_P168403, A_23_P377882	1.409 (1.294 to 1.471).1.514 (1.451 to 1.601)	1079 (134.4 to 3392).5766 (456.8 to 16900)	7.91e-06	0.534 (0.382 to 0.769).0.81 (0.574 to 1.061)	1906 (142.1 to 5678).459.7 (91.81 to 1267)	0.014615	0.27 (0.233 to 0.302).0.462 (0.303 to 0.658)	243.6 (49.28 to 627.2).846.3 (82.33 to 2802)	0.0008825	0.0714 (0.0487 to 0.099).0.355 (0.259 to 0.487)	225 (51.55 to 460.5).335.4 (30.41 to 1010)	0.0038415
ENSG00000055130	CUL1	A_23_P59657, A_24_P303589	1.13 (1.084 to 1.166).1.18 (1.112 to 1.264)	1820 (986.2 to 3289).3795 (1851 to 7467)	0.0017385	0.976 (0.903 to 1.081).0.983 (0.902 to 1.084)	1560 (615.9 to 2895).3298 (1139 to 6176)	0.635	0.888 (0.813 to 0.994).0.895 (0.857 to 0.952)	1348 (864.8 to 2486).2762 (1672 to 4976)	0.0187	0.695 (0.63 to 0.714).0.739 (0.684 to 0.768)	1418 (1297 to 1558).2977 (2237 to 3326)	0.000349
[truncated: 14,095 more rows]
