# Supplementary material for: Omics Technologies to Decipher Regulatory Networks in Granulocytic Cell Differentiation
Source: Biomolecules. 2021 Jun 18;11(6):907. doi: 10.3390/biom11060907 (PMC8233756; doi:10.3390/biom11060907)
Supplement: Supplementary file 1 [file biomolecules-11-00907-s001.zip › Table S2.xlsx]

## Sheet: Yes-set 3h (DEGs of MCD group)
3h myeloid cell differentiation GO:0030099
Uniprot ID	Gene symbol	Agilent ID	Fold Change	Description
Up-regulated
Q96Q27	ASB2	A_23_P205370	5.911	Homo sapiens ankyrin repeat and SOCS box-containing 2 (ASB2),mRNA [NM_016150]
Q16548	BCL2A1	A_23_P152002	3.295	Homo sapiens BCL2-related protein A1 (BCL2A1),mRNA [NM_004049]
P13500	CCL2	A_23_P89431	62.48	Homo sapiens chemokine (C-C motif) ligand 2 (CCL2),mRNA [NM_002982]
P16619	CCL3L1	A_24_P228130	2.412	Homo sapiens chemokine (C-C motif) ligand 3-like 3 (CCL3L3), mRNA [NM_001001437]
P13236	CCL4	A_23_P207564	15.77	Homo sapiens chemokine (C-C motif) ligand 4 (CCL4),mRNA [NM_002984]
P51681	CCR5	A_23_P412321	3.38	Homo sapiens chemokine (C-C motif) receptor 5 (CCR5),mRNA [NM_000579]
Q9UGN4	CD300A	A_24_P159434	6.656	Homo sapiens CD300A antigen (CD300A),mRNA [NM_007261]
P28907	CD38	A_23_P167328	4.911	Homo sapiens CD38 antigen (p45) (CD38),mRNA [NM_001775]
P17676	CEBPB	A_23_P411296	3.613	Homo sapiens CCAAT/enhancer binding protein (C/EBP),beta (CEBPB),mRNA [NM_005194]
P09769	FGR	A_23_P103932	12.94	Homo sapiens Gardner-Rasheed feline sarcoma viral (v-fgr) oncogene homolog (FGR),mRNA [NM_005248]
Q14469	HES1	A_23_P17998	6.36	(Drosophila) (HES1),Homo sapiens hairy and enhancer of split 1,mRNA [NM_005524]
Q8WVV9	HNRPLL	A_24_P225635,A_24_P234214	3.1885	Homo sapiens heterogeneous nuclear ribonucleoprotein L-like (HNRPLL),Q8IX05 (Q8IX05) C-type lectin BIMLEC precursor (Type I transmembrane C-type lectin receptor DCL-1),mRNA [NM_138394],partial (6%) [THC2403280]
P10145	IL8	A_32_P87013	4.091	Homo sapiens interleukin 8 (IL8),mRNA [NM_000584]
P02750	LRG1	A_23_P50638	3.129	Homo sapiens leucine-rich alpha-2-glycoprotein 1 (LRG1),mRNA [NM_052972]
P07948	LYN	A_23_P147431	2.109	Homo sapiens v-yes-1 Yamaguchi sarcoma viral related oncogene homolog (LYN),mRNA [NM_002350]
Q01201	RELB	A_23_P55706	7.233	Homo sapiens v-rel reticuloendotheliosis viral oncogene homolog B,mRNA [NM_006509],nuclear factor of kappa light polypeptide gene enhancer in B-cells 3 (avian) (RELB)
Q03169	TNFAIP2	A_23_P421423	11	Homo sapiens tumor necrosis factor,alpha-induced protein 2 (TNFAIP2),mRNA [NM_006291]
Down-regulated
Q9H165	BCL11A	A_24_P402588	0.494	Homo sapiens B-cell CLL/lymphoma 11A (zinc finger protein) (BCL11A),mRNA [NM_138553],transcript variant 5
P24468	NR2F2	A_23_P88589	0.472	Homo sapiens nuclear receptor subfamily 2,group F,mRNA [NM_021005],member 2 (NR2F2)
P43116	PTGER2	A_23_P151710	0.394	53kDa (PTGER2),Homo sapiens prostaglandin E receptor 2 (subtype EP2),mRNA [NM_000956]
Q9NS28	RGS18	A_23_P302550	0.463	Homo sapiens regulator of G-protein signalling 18 (RGS18),mRNA [NM_130782]
P05120	SERPINB2	A_23_P153185	0.292	Homo sapiens serine (or cysteine) proteinase inhibitor,clade B (ovalbumin),complete cds. [BC012609],mRNA (cDNA clone MGC:13616 IMAGE:4281085),member 2

## Sheet: Yes-set 24h (DEGs of MCD group)
24h myeloid cell differentiation GO:0030099
Uniprot ID	Gene symbol	Agilent ID	Fold Change	Description
Up-regulated
Q96Q27	ASB2	A_23_P205370	7.96	Homo sapiens ankyrin repeat and SOCS box-containing 2 (ASB2),mRNA [NM_016150]
Q16548	BCL2A1	A_23_P152002	7.338	Homo sapiens BCL2-related protein A1 (BCL2A1),mRNA [NM_004049]
P13500	CCL2	A_23_P89431	37.61	Homo sapiens chemokine (C-C motif) ligand 2 (CCL2),mRNA [NM_002982]
P13501	CCL5	A_23_P152838	3.307	Homo sapiens chemokine (C-C motif) ligand 5 (CCL5),mRNA [NM_002985]
P51681	CCR5	A_23_P412321	18.46	Homo sapiens chemokine (C-C motif) receptor 5 (CCR5),mRNA [NM_000579]
Q9UGN4	CD300A	A_23_P207037,A_24_P159434	13.42	Homo sapiens CD300A antigen (CD300A),mRNA [NM_007261]
P28907	CD38	A_23_P167328	24.59	Homo sapiens CD38 antigen (p45) (CD38),mRNA [NM_001775]
P17676	CEBPB	A_23_P143242,A_23_P411296	4.39	Homo sapiens CCAAT/enhancer binding protein (C/EBP),beta (CEBPB),mRNA [NM_005194]
P09769	FGR	A_23_P103932	28.04	Homo sapiens Gardner-Rasheed feline sarcoma viral (v-fgr) oncogene homolog (FGR),mRNA [NM_005248]
Q8WVV9	HNRPLL	A_24_P225635,A_24_P234214	3.052	Homo sapiens heterogeneous nuclear ribonucleoprotein L-like (HNRPLL),Q8IX05 (Q8IX05) C-type lectin BIMLEC precursor (Type I transmembrane C-type lectin receptor DCL-1),mRNA [NM_138394],partial (6%) [THC2403280]
Q16666	IFI16	A_23_P217866	2.022	Homo sapiens cDNA FLJ37649 fis,clone BRHIP2000534,moderately similar to GAMMA-INTERFERON-INDUCIBLE PROTEIN IFI-16. [AK094968]
P10145	IL8	A_32_P87013	2.165	Homo sapiens interleukin 8 (IL8),mRNA [NM_000584]
P09382	LGALS1	A_23_P166459	2.511	1 (galectin 1) (LGALS1),Homo sapiens lectin,galactoside-binding,mRNA [NM_002305],soluble
P02750	LRG1	A_23_P50638	4.264	Homo sapiens leucine-rich alpha-2-glycoprotein 1 (LRG1),mRNA [NM_052972]
P33241	LSP1	A_23_P13382	5.325	Homo sapiens lymphocyte-specific protein 1 (LSP1),mRNA [NM_001013254],transcript variant 3
P05771	PRKCB	A_23_P206585,A_24_P935330	4.255	3' UTR; fetal brain cDNA ICRFp507K04156. [AJ002788],Homo sapiens mRNA for protein kinase C beta 1,Homo sapiens protein kinase C,beta 1 (PRKCB1),mRNA [NM_002738],transcript variant 2
O95716	RAB3D	A_24_P236956	2.424	Homo sapiens RAB3D,mRNA (cDNA clone IMAGE:4301650),member RAS oncogene family,partial cds. [BC007960]
Q03169	TNFAIP2	A_23_P421423	6.978	Homo sapiens tumor necrosis factor,alpha-induced protein 2 (TNFAIP2),mRNA [NM_006291]
Down-regulated
P23769	GATA2	A_23_P110022	0.277	Homo sapiens GATA binding protein 2 (GATA2),mRNA [NM_032638]
P05412	JUN	A_23_P201538	0.282	Homo sapiens v-jun sarcoma virus 17 oncogene homolog (avian) (JUN),mRNA [NM_002228]
Q09327	MGAT3	A_24_P128361,A_24_P245838	0.405	Homo sapiens cDNA FLJ43371 fis,Homo sapiens clone pp6337 unknown mRNA. [AF289562],clone NTONG2005969. [AK125361]
P19793	RXRA	A_23_P423197	0.325	Homo sapiens retinoid X receptor,alpha (RXRA),mRNA [NM_002957]
P05120	SERPINB2	A_23_P153185	0.261	Homo sapiens serine (or cysteine) proteinase inhibitor,clade B (ovalbumin),complete cds. [BC012609],mRNA (cDNA clone MGC:13616 IMAGE:4281085),member 2
P19544	WT1	A_23_P116280	0.333	Homo sapiens Wilms tumor 1 (WT1),mRNA [NM_024424],transcript variant B

## Sheet: Yes-set 96h (DEGs of MCD group)
96h myeloid cell differentiation GO:0030099
Uniprot ID	Gene symbol	Agilent ID	Fold Change	Description
Up-regulated
P08910	ABHD2	A_23_P395172	2.222	Homo sapiens cDNA FLJ38366 fis,clone FEBRA2001134. [AK095685]
P14621	ACYP2	A_23_P256988,A_24_P336848	2.572	Homo sapiens acylphosphatase 2,mRNA [NM_138448],muscle type (ACYP2)
Q96Q27	ASB2	A_23_P205370	10.53	Homo sapiens ankyrin repeat and SOCS box-containing 2 (ASB2),mRNA [NM_016150]
Q16548	BCL2A1	A_23_P152002	24.56	Homo sapiens BCL2-related protein A1 (BCL2A1),mRNA [NM_004049]
P13500	CCL2	A_23_P89431	42.69	Homo sapiens chemokine (C-C motif) ligand 2 (CCL2),mRNA [NM_002982]
P13236	CCL4	A_23_P207564	3.459	Homo sapiens chemokine (C-C motif) ligand 4 (CCL4),mRNA [NM_002984]
P13501	CCL5	A_23_P152838	3.579	Homo sapiens chemokine (C-C motif) ligand 5 (CCL5),mRNA [NM_002985]
P30281	CCND3	A_23_P361773	3.287	Homo sapiens cyclin D3 (CCND3),mRNA [NM_001760]
P51681	CCR5	A_23_P412321	62.71	Homo sapiens chemokine (C-C motif) receptor 5 (CCR5),mRNA [NM_000579]
Q9UGN4	CD300A	A_23_P207037,A_24_P159434	23.32	Homo sapiens CD300A antigen (CD300A),mRNA [NM_007261]
P28907	CD38	A_23_P167328	31.05	Homo sapiens CD38 antigen (p45) (CD38),mRNA [NM_001775]
P17676	CEBPB	A_23_P143242,A_23_P411296	7.997	Homo sapiens CCAAT/enhancer binding protein (C/EBP),beta (CEBPB),mRNA [NM_005194]
Q9UHP7	CLEC2D	A_23_P204689	2.851	Homo sapiens C-type lectin superfamily 2,mRNA [NM_001004419],member D (CLEC2D),transcript variant 2
Q9NSA3	CTNNBIP1	A_23_P23584	2.016	Homo sapiens catenin,beta interacting protein 1 (CTNNBIP1),mRNA [NM_020248],transcript variant 1
O43781	DYRK3	A_23_P12282	2.102	Homo sapiens dual-specificity tyrosine-(Y)-phosphorylation regulated kinase 3 (DYRK3),mRNA [NM_001004023],transcript variant 2
Q13542	EIF4EBP2	A_24_P115621	2.22	Homo sapiens mRNA; cDNA DKFZp762K067 (from clone DKFZp762K067). [CR627373]
Q9UHX3	EMR2	A_23_P502336	2.303	Homo sapiens egf-like module containing,hormone receptor-like 2 (EMR2),mRNA [NM_013447],mucin-like,transcript variant 1
P09769	FGR	A_23_P103932	33.41	Homo sapiens Gardner-Rasheed feline sarcoma viral (v-fgr) oncogene homolog (FGR),mRNA [NM_005248]
Q9UQC2	GAB2	A_23_P203743	4.086	Homo sapiens GRB2-associated binding protein 2 (GAB2),mRNA [NM_012296],transcript variant 2
Q8WWW8	GAB3	A_23_P255126	2.493	Homo sapiens GRB2-associated binding protein 3 (GAB3),mRNA [NM_080612]
Q8WVV9	HNRPLL	A_24_P225635,A_24_P234214	4.317	Homo sapiens heterogeneous nuclear ribonucleoprotein L-like (HNRPLL),Q8IX05 (Q8IX05) C-type lectin BIMLEC precursor (Type I transmembrane C-type lectin receptor DCL-1),mRNA [NM_138394],partial (6%) [THC2403280]
Q16666	IFI16	A_23_P217866	3.11	Homo sapiens cDNA FLJ37649 fis,clone BRHIP2000534,moderately similar to GAMMA-INTERFERON-INDUCIBLE PROTEIN IFI-16. [AK094968]
Q14005	IL16	A_23_P61057	2.338	Homo sapiens interleukin 16 (lymphocyte chemoattractant factor) (IL16),mRNA [NM_004513],transcript variant 1
P10145	IL8	A_32_P87013	5.742	Homo sapiens interleukin 8 (IL8),mRNA [NM_000584]
Q92985	IRF7	A_24_P378019	2.639	Homo sapiens interferon regulatory factor 7 (IRF7),mRNA [NM_004031],transcript variant d
P10721	KIT	A_23_P110253	2.746	Homo sapiens v-kit Hardy-Zuckerman 4 feline sarcoma viral oncogene homolog (KIT),mRNA [NM_000222]
Q6GTX8	LAIR1	A_23_P209135,A_24_P262688	3.187	Homo sapiens leukocyte-associated Ig-like receptor 1 (LAIR1),mRNA [NM_021706],mRNA [NM_021708],transcript variant b,transcript variant c
P09382	LGALS1	A_23_P166459	3.485	1 (galectin 1) (LGALS1),Homo sapiens lectin,galactoside-binding,mRNA [NM_002305],soluble
P02750	LRG1	A_23_P50638	8.695	Homo sapiens leucine-rich alpha-2-glycoprotein 1 (LRG1),mRNA [NM_052972]
P33241	LSP1	A_23_P13382	12.11	Homo sapiens lymphocyte-specific protein 1 (LSP1),mRNA [NM_001013254],transcript variant 3
P26927	MST1	A_24_P148796	2.426	Homo sapiens macrophage stimulating 1 (hepatocyte growth factor-like) (MST1),mRNA [NM_020998]
Q96S97	MYADM	A_23_P27584	2.003	Homo sapiens myeloid-associated differentiation marker (MYADM),mRNA [NM_001020818],transcript variant 1
Q13459	MYO9B	A_24_P246173	2.302	Homo sapiens myosin IXB (MYO9B),mRNA [NM_004145]
Q13133	NR1H3	A_23_P47135	2.445	Homo sapiens nuclear receptor subfamily 1,group H,mRNA [NM_005693],member 3 (NR1H3)
Q8IYS5	OSCAR	A_23_P50368	2.1	Homo sapiens osteoclast-associated receptor (OSCAR),mRNA [NM_206818],transcript variant 1
Q96QH2	PRAM1	A_23_P165219	2.632	Homo sapiens PML-RARA regulated adaptor molecule 1 (PRAM1),mRNA [NM_032152]
P05771	PRKCB	A_23_P206585,A_24_P935330	6.879	3' UTR; fetal brain cDNA ICRFp507K04156. [AJ002788],Homo sapiens mRNA for protein kinase C beta 1,Homo sapiens protein kinase C,beta 1 (PRKCB1),mRNA [NM_002738],transcript variant 2
P29350	PTPN6	A_23_P162486	2.498	Homo sapiens protein tyrosine phosphatase,mRNA [NM_002831],non-receptor type 6 (PTPN6),transcript variant 1
O95716	RAB3D	A_24_P236956	3.709	Homo sapiens RAB3D,mRNA (cDNA clone IMAGE:4301650),member RAS oncogene family,partial cds. [BC007960]
Q01201	RELB	A_23_P55706	3.213	Homo sapiens v-rel reticuloendotheliosis viral oncogene homolog B,mRNA [NM_006509],nuclear factor of kappa light polypeptide gene enhancer in B-cells 3 (avian) (RELB)
Q03169	TNFAIP2	A_23_P421423	5.971	Homo sapiens tumor necrosis factor,alpha-induced protein 2 (TNFAIP2),mRNA [NM_006291]
Q9H3M7	TXNIP	A_23_P97700	2.562	Homo sapiens thioredoxin interacting protein (TXNIP),mRNA [NM_006472]
O43914	TYROBP	A_23_P27994	4.827	Homo sapiens TYRO protein tyrosine kinase binding protein (TYROBP),mRNA [NM_003332],transcript variant 1
P42768	WAS	A_23_P96331	2.132	Homo sapiens Wiskott-Aldrich syndrome (eczema-thrombocytopenia) (WAS),mRNA [NM_000377]
Q15942	ZYX	A_23_P254888	2.286	Homo sapiens zyxin (ZYX),mRNA [NM_003461],transcript variant 1
Down-regulated
Q9H165	BCL11A	A_24_P402588,A_24_P411186	0.45	Homo sapiens B-cell CLL/lymphoma 11A (zinc finger protein) (BCL11A),mRNA [NM_022893],mRNA [NM_138553],transcript variant 1,transcript variant 5
P30279	CCND2	A_23_P139881,A_24_P270235	0.491	Homo sapiens cyclin D2 (CCND2),mRNA [NM_001759]
P16070	CD44	A_23_P24870	0.276	Homo sapiens CD44 antigen (homing function and Indian blood group system) (CD44),mRNA [NM_000610],transcript variant 1
P52429	DGKE	A_32_P540991	0.488	Homo sapiens cDNA FLJ33029 fis,clone THYMU2000162. [AK057591]
P49619	DGKG	A_23_P40926	0.412	Homo sapiens diacylglycerol kinase,gamma 90kDa (DGKG),mRNA [NM_001346]
P52799	EFNB2	A_24_P355944	0.404	Homo sapiens ephrin-B2 (EFNB2),mRNA [NM_004093]
P08246	ELANE	A_23_P130961	0.191	Homo sapiens elastase 2,mRNA [NM_001972],neutrophil (ELA2)
P23769	GATA2	A_23_P110022	0.153	Homo sapiens GATA binding protein 2 (GATA2),mRNA [NM_032638]
Q14469	HES1	A_23_P17998	0.196	(Drosophila) (HES1),Homo sapiens hairy and enhancer of split 1,mRNA [NM_005524]
P52758	HRSP12	A_23_P134714	0.374	Homo sapiens heat-responsive protein 12 (HRSP12),mRNA [NM_005836]
P07900	HSP90AA1	A_23_P162874	0.349	Homo sapiens heat shock 90kDa protein 1,alpha (HSPCA),mRNA [NM_005348],transcript variant 2
O75144	ICOSLG	A_23_P166280	0.174	UI-E-EJ1-ajv-o-09-0-UI.r1 UI-E-EJ1 Homo sapiens cDNA clone UI-E-EJ1-ajv-o-09-0-UI 5',mRNA sequence [BQ189193]
Q8TAD2	IL17D	A_23_P345692	0.427	Homo sapiens interleukin 17D (IL17D),mRNA [NM_138284]
P05412	JUN	A_23_P201538	0.452	Homo sapiens v-jun sarcoma virus 17 oncogene homolog (avian) (JUN),mRNA [NM_002228]
O60675	MAFK	A_23_P373598	0.371	Homo sapiens cDNA FLJ32205 fis,clone PLACE6003094. [AK056767]
P42679	MATK	A_23_P50678	0.374	Homo sapiens megakaryocyte-associated tyrosine kinase (MATK),mRNA [NM_139354],transcript variant 3
Q09327	MGAT3	A_24_P128361,A_24_P245838	0.341	Homo sapiens cDNA FLJ43371 fis,Homo sapiens clone pp6337 unknown mRNA. [AF289562],clone NTONG2005969. [AK125361]
Q05195	MXD1	A_23_P408094	0.411	Homo sapiens MAX dimerization protein 1 (MXD1),mRNA [NM_002357]
P10242	MYB	A_23_P31073	0.373	Homo sapiens v-myb myeloblastosis viral oncogene homolog (avian) (MYB),mRNA [NM_005375]
Q16621	NFE2	A_23_P13753	0.154	45kDa (NFE2),Homo sapiens nuclear factor (erythroid-derived 2),mRNA [NM_006163]
P24468	NR2F2	A_23_P88589,A_24_P313354	0.397	Homo sapiens nuclear receptor subfamily 2,group F,mRNA [NM_021005],member 2 (NR2F2)
Q9Y266	NUDC	A_23_P74653	0.494	Homo sapiens nuclear distribution gene C homolog (A. nidulans) (NUDC),mRNA [NM_006600]
Q06830	PRDX1	A_23_P11995	0.204	Homo sapiens peroxiredoxin 1 (PRDX1),mRNA [NM_002574],transcript variant 1
P24158	PRTN3	A_23_P142345	0.12	Homo sapiens proteinase 3 (serine proteinase,Wegener granulomatosis autoantigen) (PRTN3),mRNA [NM_002777],neutrophil
P10153	RNASE2	A_23_P151637,A_23_P163025	0.254	2 (liver,3 (eosinophil cationic protein) (RNASE3),Homo sapiens ribonuclease,RNase A family,eosinophil-derived neurotoxin) (RNASE2),mRNA [NM_002934],mRNA [NM_002935]
Q01196	RUNX1	A_24_P34155	0.381	Homo sapiens mRNA for AML1a protein,complete cds. [D43967]
P19793	RXRA	A_23_P219176,A_23_P423197	0.467	Homo sapiens retinoid X receptor,alpha (RXRA),mRNA [NM_002957]
P05120	SERPINB2	A_23_P153185	0.271	Homo sapiens serine (or cysteine) proteinase inhibitor,clade B (ovalbumin),complete cds. [BC012609],mRNA (cDNA clone MGC:13616 IMAGE:4281085),member 2
P15923	TCF3	A_23_P67708,A_24_P367397	0.435	Homo sapiens transcription factor 3 (E2A immunoglobulin enhancer binding factors E12/E47) (TCF3),mRNA [NM_003200]
O00220	TNFRSF10A	A_23_P255653	0.385	Homo sapiens tumor necrosis factor receptor superfamily,mRNA [NM_003844],member 10a (TNFRSF10A)
O75509	TNFRSF21	A_23_P30666	0.341	Homo sapiens tumor necrosis factor receptor superfamily,mRNA [NM_014452],member 21 (TNFRSF21)
P10599	TXN	A_24_P175519	0.414	Homo sapiens thioredoxin (TXN),mRNA [NM_003329]
P11473	VDR	A_23_P162589	0.201	25- dihydroxyvitamin D3) receptor (VDR),Homo sapiens vitamin D (1,mRNA [NM_001017535],transcript variant 2
Q8NI36	WDR36	A_23_P110598,A_24_P106357	0.434	Homo sapiens WD repeat domain 36 (WDR36),mRNA [NM_139281]
P19544	WT1	A_23_P116280	0.0599	Homo sapiens Wilms tumor 1 (WT1),mRNA [NM_024424],transcript variant B
Q05516	ZBTB16	A_23_P104804	0.139	Homo sapiens zinc finger and BTB domain containing 16 (ZBTB16),mRNA [NM_006006],transcript variant 1
