# Supplementary material for: Omics Technologies to Decipher Regulatory Networks in Granulocytic Cell Differentiation
Source: Biomolecules. 2021 Jun 18;11(6):907. doi: 10.3390/biom11060907 (PMC8233756; doi:10.3390/biom11060907)
Supplement: Supplementary file 1 [file biomolecules-11-00907-s001.zip › Table S3.xlsx]

## Sheet: Summary
The table contains protein identifier used in the FASTA file, amino acid sequence of the peptide including the previous and next amino acids in the corresponding protein sequence (peptide_w_cleave), naked amino acid sequence (peptide), the number of different protein sequences in which the peptide appears (multiple_proteins), the maximum peptide identification probability across all identified sp…

## Sheet: 0h 3bio
protein	peptide_w_cleav	peptide	multiple_proteins	max_ID_probability	number_spectra	start	stop	length	MImass	condition
contam_gi|1082558|pir||S41161	X.DQIVDLTVGNNKTLLDIDNTR.X	DQIVDLTVGNNKTLLDIDNTR	4	0.9992	13	213	233	21	2356.22	0h
contam_gi|1082558|pir||S41161	X.NYSPYYNTIDDLKDQIVDLTVGNNK.X	NYSPYYNTIDDLKDQIVDLTVGNNK	4	1	3	200	224	25	2901.4	0h
contam_gi|1083132|pir||A56694	X.LTAEIENAK.X	LTAEIENAK	5	0.9973	4	349	357	9	987.523	0h
contam_gi|1083132|pir||A56694	X.AEAESWYR.X	AEAESWYR	20	0.9985	2	308	315	8	1010.45	0h
contam_gi|1083132|pir||A56694	X.LGLDIEIATYR.X	LGLDIEIATYR	22	1	7	414	424	11	1262.69	0h
contam_gi|1083132|pir||A56694	X.TKEEINELNR.X	TKEEINELNR	18	1	2	335	344	10	1244.64	0h
contam_gi|109048|pir||S22025	K.AQYDDIASR.S	AQYDDIASR	6	0.9772	3	281	289	9	1037.48	0h
contam_gi|109048|pir||S22025	R.RLYEEEIR.V	RLYEEEIR	11	0.9906	1	242	249	8	1106.57	0h
contam_gi|109048|pir||S22025	R.DLNMDNIVAEIK.A	DLNMDNIVAEIK	3	0.9974	1	269	280	12	1373.68	0h
contam_gi|109048|pir||S22025	R.LTAEVENAK.C	LTAEVENAK	13	0.999	1	333	341	9	973.507	0h
contam_gi|109048|pir||S22025	R.EAECAEADSGR.L	EAECAEADSGR	2	1	4	165	175	11	1136.44	0h
contam_gi|109048|pir||S22025	R.KSDLEANVEALIQETDFLR.R	KSDLEANVEALIQETDFLR	2	1	5	223	241	19	2190.12	0h
contam_gi|109048|pir||S22025	K.LAGLEEALQK.A	LAGLEEALQK	8	1	1	369	378	10	1070.6	0h
contam_gi|109048|pir||S22025	R.LSSELNSLQEVLEGYK.K	LSSELNSLQEVLEGYK	2	1	5	176	191	16	1807.92	0h
contam_gi|109048|pir||S22025	R.LSSELNSLQEVLEGYKK.R	LSSELNSLQEVLEGYKK	1	1	5	176	192	17	1936.01	0h
contam_gi|109048|pir||S22025	R.RYEEEVALR.A	RYEEEVALR	2	1	3	194	202	9	1163.59	0h
contam_gi|109048|pir||S22025	R.SRAEAESWYR.S	SRAEAESWYR	20	1	5	290	299	10	1253.58	0h
contam_gi|109122|pir||S07158	X.DVEEWYIR.X	DVEEWYIR	4	0.9878	2	22	29	8	1108.52	0h
contam_gi|109122|pir||S07158	X.AQYEALVETNRR.X	AQYEALVETNRR	4	0.9992	5	10	21	12	1448.74	0h
contam_gi|109122|pir||S07158	X.DSLENTLTETEAR.X	DSLENTLTETEAR	4	0.9993	1	74	86	13	1477.69	0h
contam_gi|125090|sp|P02534|K1M1_SHEEP	R.TIEELQQK.I	TIEELQQK	13	0.9037	1	108	115	8	987.524	0h
contam_gi|125090|sp|P02534|K1M1_SHEEP	X.TKYETELGLR.X	TKYETELGLR	2	0.9727	1	142	151	10	1208.64	0h
contam_gi|125090|sp|P02534|K1M1_SHEEP	R.QNQEYQVLLDVR.A	QNQEYQVLLDVR	19	0.9989	2	334	345	12	1503.77	0h
contam_gi|125090|sp|P02534|K1M1_SHEEP	R.LVVQIDNAK.L	LVVQIDNAK	9	0.9992	3	126	134	9	998.574	0h
contam_gi|125090|sp|P02534|K1M1_SHEEP	R.LNVEVDAAPTVDLNR.V	LNVEVDAAPTVDLNR	4	1	4	208	222	15	1624.84	0h
contam_gi|125090|sp|P02534|K1M1_SHEEP	K.SNHEEEVNTLR.S	SNHEEEVNTLR	2	1	5	191	201	11	1326.62	0h
contam_gi|125090|sp|P02534|K1M1_SHEEP	R.TVNALEVELQAQHNLR.D	TVNALEVELQAQHNLR	2	1	5	277	292	16	1833.97	0h
contam_gi|125116|sp|P15241|K2M2_SHEEP	R.LLEGEEQR.L	LLEGEEQR	18	0.9964	3	412	419	8	972.488	0h
contam_gi|125116|sp|P15241|K2M2_SHEEP	K.LEAAVTQAEQQGEVALNDAR.C	LEAAVTQAEQQGEVALNDAR	2	1	3	349	368	20	2112.05	0h
contam_gi|125116|sp|P15241|K2M2_SHEEP	R.VLQANISDTSVIVK.M	VLQANISDTSVIVK	2	1	5	252	265	14	1485.84	0h
contam_gi|125117|sp|P25691|K2M3_SHEEP	X.TKLEAAVAEAEQQGEAALNDAR.X	TKLEAAVAEAEQQGEAALNDAR	2	0.9992	1	360	381	22	2284.13	0h
contam_gi|1346343|sp|P04264|K2C1_HUMAN	X.TNAENEFVTIKK.X	TNAENEFVTIKK	4	0.9966	2	278	289	12	1392.72	0h
contam_gi|1346343|sp|P04264|K2C1_HUMAN	X.NMQDMVEDYR.X	NMQDMVEDYR	4	0.9975	2	258	267	10	1299.52	0h
contam_gi|1346343|sp|P04264|K2C1_HUMAN	X.FLEQQNQVLQTK.X	FLEQQNQVLQTK	7	1	15	200	211	12	1474.78	0h
contam_gi|1346343|sp|P04264|K2C1_HUMAN	X.SLDLDSIIAEVK.X	SLDLDSIIAEVK	2	1	1	344	355	12	1301.71	0h
sp|A0AVT1|UBA6_HUMAN	K.EDFTLLDFINAVK.E	EDFTLLDFINAVK	1	1	3	964	976	13	1523.79	0h
sp|A0FGR8|ESYT2_HUMAN	X.ALALLEDEER.X	ALALLEDEER	1	0.9898	1	163	172	10	1157.59	0h
sp|A0FGR8|ESYT2_HUMAN	R.LLDEWFTLDEVPK.G	LLDEWFTLDEVPK	2	1	9	484	496	13	1603.81	0h
sp|A2A3N6|PIPSL_HUMAN	K.LTAFVNTLNGK.D	LTAFVNTLNGK	4	0.9875	1	638	648	11	1176.65	0h
sp|A5A3E0|POTEF_HUMAN	X.AVFPSIVGRPR.X	AVFPSIVGRPR	24	0.9983	25	729	739	11	1197.7	0h
sp|A5A3E0|POTEF_HUMAN	X.AGFAGDDAPR.X	AGFAGDDAPR	25	1	34	719	728	10	975.439	0h
sp|A5A3E0|POTEF_HUMAN	X.IWHHTFYNELR.X	IWHHTFYNELR	17	1	52	785	795	11	1514.74	0h
sp|A5A3E0|POTEF_HUMAN	X.SYELPDGQVITIGNER.X	SYELPDGQVITIGNER	17	1	59	939	954	16	1789.88	0h
sp|A5YKK6|CNOT1_HUMAN	X.SLDLIESLLR.X	SLDLIESLLR	1	0.999	1	450	459	10	1157.66	0h
sp|A6NGZ7|U93BL_HUMAN	X.TGLSTLLGILYEDKER.X	TGLSTLLGILYEDKER	2	0.9993	1	103	118	16	1806.97	0h
sp|A6NHG4|DDTL_HUMAN	X.PFLELDTNLPANR.X	PFLELDTNLPANR	5	1	7	2	14	13	1498.78	0h
sp|A6NHG4|DDTL_HUMAN	X.PFLELDTNLPANRVPAGLEK.X	PFLELDTNLPANRVPAGLEK	5	1	4	2	21	20	2193.18	0h
sp|A6NHL2|TBAL3_HUMAN	X.LDHKFDLMYAK.X	LDHKFDLMYAK	12	1	14	398	408	11	1379.69	0h
sp|A6NHQ2|FBLL1_HUMAN	X.IVALNAHTFLR.X	IVALNAHTFLR	2	0.9981	2	257	267	11	1253.72	0h
sp|A6NHR9|SMHD1_HUMAN	X.GMVFGAPVPK.X	GMVFGAPVPK	1	0.9748	1	1888	1897	10	1001.53	0h
sp|A6NHR9|SMHD1_HUMAN	X.LTFMDLELK.X	LTFMDLELK	1	0.9803	1	526	534	9	1108.58	0h
sp|A6NHR9|SMHD1_HUMAN	X.LLLIDWPELK.X	LLLIDWPELK	1	0.9993	8	1257	1266	10	1238.73	0h
sp|A6NHR9|SMHD1_HUMAN	K.LYFKPIGDPVFAR.D	LYFKPIGDPVFAR	1	0.9999	4	1799	1811	13	1521.83	0h
sp|A6NHR9|SMHD1_HUMAN	R.ANLGVFSVFAPR.G	ANLGVFSVFAPR	1	1	1	1325	1336	12	1276.69	0h
sp|A6NHR9|SMHD1_HUMAN	K.FSFGLLDLPFR.V	FSFGLLDLPFR	1	1	15	826	836	11	1310.7	0h
sp|A6NHR9|SMHD1_HUMAN	K.SLFEASQQLLNEMK.C	SLFEASQQLLNEMK	1	1	8	1642	1655	14	1636.81	0h
sp|A6NIZ1|RP1BL_HUMAN	X.VKDTDDVPMILVGNK.X	VKDTDDVPMILVGNK	4	1	23	103	117	15	1642.86	0h
sp|A6NK07|IF2BL_HUMAN	R.EKNPDMVAGEK.R	EKNPDMVAGEK	3	1	4	183	193	11	1216.57	0h
sp|A6NKZ8|YI016_HUMAN	X.IREEYPDR.X	IREEYPDR	14	0.9983	6	83	90	8	1076.53	0h
sp|A6NKZ8|YI016_HUMAN	X.KLAVNMVPFPR.X	KLAVNMVPFPR	22	1	7	180	190	11	1270.72	0h
sp|A6NKZ8|YI016_HUMAN	X.LHFFMPGFAPLTSR.X	LHFFMPGFAPLTSR	19	1	45	191	204	14	1619.83	0h
sp|A8K0Z3|WASH1_HUMAN	K.QQQKEQEQVR.A	QQQKEQEQVR	2	0.9732	1	391	400	10	1299.65	0h
sp|A8MW06|TMSL3_HUMAN	K.ETIEQEKQAGES.-	ETIEQEKQAGES	4	1	4	33	44	12	1347.62	0h
sp|A8MW06|TMSL3_HUMAN	K.KTETQEKNPLPSK.E	KTETQEKNPLPSK	4	1	10	20	32	13	1498.8	0h
sp|A8MW06|TMSL3_HUMAN	K.NPLPSKETIEQEK.Q	NPLPSKETIEQEK	5	1	20	27	39	13	1511.78	0h
sp|A8MW06|TMSL3_HUMAN	K.NPLPSKETIEQEKQAGES.-	NPLPSKETIEQEKQAGES	4	1	5	27	44	18	1983.97	0h
sp|A8MW06|TMSL3_HUMAN	K.TETQEKNPLPSK.E	TETQEKNPLPSK	4	1	34	21	32	12	1370.7	0h
sp|A8MW06|TMSL3_HUMAN	K.TETQEKNPLPSKETIEQEK.Q	TETQEKNPLPSKETIEQEK	4	1	36	21	39	19	2228.12	0h
sp|A8MWD9|RUXGL_HUMAN	K.AHPPELKK.F	AHPPELKK	3	0.998	8	4	11	8	918.527	0h
sp|A8MWD9|RUXGL_HUMAN	X.GNSIIMLEALERV.X	GNSIIMLEALERV	4	0.9991	4	64	76	13	1443.77	0h
sp|A8MWD9|RUXGL_HUMAN	R.GNSIIMLEALER.V	GNSIIMLEALER	4	1	3	64	75	12	1344.71	0h
sp|B0I1T2|MYO1G_HUMAN	K.VAAMGALQGLR.Q	VAAMGALQGLR	1	0.9984	2	816	826	11	1085.6	0h
sp|B0I1T2|MYO1G_HUMAN	K.EGLAVAEEALVDHVAELTATPR.D	EGLAVAEEALVDHVAELTATPR	1	1	5	298	319	22	2290.18	0h
sp|B0I1T2|MYO1G_HUMAN	K.GHTAAEASYAR.D	GHTAAEASYAR	1	1	1	342	352	11	1132.53	0h
sp|B0I1T2|MYO1G_HUMAN	X.LIPIIVLLLQK.X	LIPIIVLLLQK	1	1	2	709	719	11	1261.87	0h
sp|B2RPK0|HGB1A_HUMAN	X.FKDPNAPK.X	FKDPNAPK	7	0.9898	10	89	96	8	915.479	0h
sp|B2RPK0|HGB1A_HUMAN	X.GEHPGLSIGDVAK.X	GEHPGLSIGDVAK	5	1	13	115	127	13	1278.65	0h
sp|B2RPK0|HGB1A_HUMAN	X.IKGEHPGLSIGDVAK.X	IKGEHPGLSIGDVAK	5	1	19	113	127	15	1519.83	0h
sp|O00116|ADAS_HUMAN	K.NIYGNIEDLVVHIK.M	NIYGNIEDLVVHIK	1	1	1	324	337	14	1625.88	0h
sp|O00148|DX39A_HUMAN	X.DFLLKPELLR.X	DFLLKPELLR	30	0.9991	19	48	57	10	1242.73	0h
sp|O00148|DX39A_HUMAN	K.GSYVSIHSSGFR.D	GSYVSIHSSGFR	73	1	13	36	47	12	1295.62	0h
sp|O00148|DX39A_HUMAN	X.LTLHGLQQYYVK.X	LTLHGLQQYYVK	21	1	6	256	267	12	1461.8	0h
sp|O00148|DX39A_HUMAN	K.MLEQLDMR.R	MLEQLDMR	42	1	9	200	207	8	1034.49	0h
sp|O00148|DX39A_HUMAN	X.VNIVFNYDMPEDSDTYLHR.X	VNIVFNYDMPEDSDTYLHR	1	1	9	355	373	19	2327.05	0h
sp|O00170|AIP_HUMAN	K.HVVLYPLVAK.S	HVVLYPLVAK	2	0.999	1	94	103	10	1137.69	0h
sp|O00170|AIP_HUMAN	K.VLELDPALAPVVSR.E	VLELDPALAPVVSR	1	1	1	291	304	14	1477.85	0h
sp|O00182|LEG9_HUMAN	X.NTQIDNSWGSEER.X	NTQIDNSWGSEER	3	1	3	280	292	13	1534.66	0h
sp|O00186|STXB3_HUMAN	K.MTDLLEEGITVVENIYK.N	MTDLLEEGITVVENIYK	1	1	3	51	67	17	1965.99	0h
sp|O00193|SMAP_HUMAN	K.INEELESQYQQSMDSK.L	INEELESQYQQSMDSK	4	1	2	76	91	16	1927.85	0h
sp|O00203|AP3B1_HUMAN	X.NAAHAIQKLYSLDPEQK.X	NAAHAIQKLYSLDPEQK	2	0.9517	1	169	185	17	1925	0h
sp|O00217|NDUS8_HUMAN	R.TLLWTELFR.G	TLLWTELFR	4	0.9998	1	58	66	9	1177.65	0h
sp|O00231|PSD11_HUMAN	R.AELRDDPIISTHLAK.L	AELRDDPIISTHLAK	1	0.937	2	311	325	15	1677.9	0h
sp|O00231|PSD11_HUMAN	R.VQIEHISSLIK.L	VQIEHISSLIK	1	0.9757	1	345	355	11	1265.73	0h
sp|O00231|PSD11_HUMAN	X.LVSLYFDTK.X	LVSLYFDTK	1	0.9894	2	133	141	9	1084.58	0h
sp|O00231|PSD11_HUMAN	K.EQSILELGSLLAK.T	EQSILELGSLLAK	1	1	14	47	59	13	1399.79	0h
sp|O00231|PSD11_HUMAN	X.LYDNLLEQNLIR.X	LYDNLLEQNLIR	1	1	2	326	337	12	1502.81	0h
sp|O00232|PSD12_HUMAN	K.LNSLMSLVNK.T	LNSLMSLVNK	2	1	2	432	441	10	1117.61	0h
sp|O00232|PSD12_HUMAN	R.LQEVIETLLSLEK.Q	LQEVIETLLSLEK	1	1	12	40	52	13	1513.86	0h
sp|O00244|ATOX1_HUMAN	K.YDIDLPNKK.V	YDIDLPNKK	3	1	2	31	39	9	1104.58	0h
sp|O00273|DFFA_HUMAN	K.AAFGEEVDAVDTGISR.E	AAFGEEVDAVDTGISR	2	1	3	214	229	16	1635.77	0h
sp|O00299|CLIC1_HUMAN	X.GFTIPEAFR.X	GFTIPEAFR	2	0.9763	1	196	204	9	1036.53	0h
sp|O00299|CLIC1_HUMAN	K.GVTFNVTTVDTK.R	GVTFNVTTVDTK	2	1	2	38	49	12	1280.66	0h
sp|O00299|CLIC1_HUMAN	K.LAALNPESNTAGLDIFAK.F	LAALNPESNTAGLDIFAK	2	1	15	96	113	18	1843.97	0h
sp|O00299|CLIC1_HUMAN	R.LFMVLWLK.G	LFMVLWLK	2	1	15	30	37	8	1048.61	0h
sp|O00299|CLIC1_HUMAN	K.NSNPALNDNLEK.G	NSNPALNDNLEK	2	1	11	120	131	12	1327.64	0h
sp|O00299|CLIC1_HUMAN	K.VLDNYLTSPLPEEVDETSAEDEGVSQR.K	VLDNYLTSPLPEEVDETSAEDEGVSQR	2	1	12	139	165	27	2991.38	0h
sp|O00299|CLIC1_HUMAN	K.VLDNYLTSPLPEEVDETSAEDEGVSQRK.F	VLDNYLTSPLPEEVDETSAEDEGVSQRK	2	1	3	139	166	28	3119.48	0h
sp|O00299|CLIC1_HUMAN	R.YLSNAYAR.E	YLSNAYAR	2	1	6	209	216	8	956.47	0h
sp|O00303|EIF3F_HUMAN	X.VIGTLLGTVDK.X	VIGTLLGTVDK	2	0.9754	1	116	126	11	1114.66	0h
sp|O00303|EIF3F_HUMAN	R.FLMSLVNQVPK.I	FLMSLVNQVPK	2	1	2	307	317	11	1274.7	0h
sp|O00303|EIF3F_HUMAN	R.IQDALSTVLQYAEDVLSGK.V	IQDALSTVLQYAEDVLSGK	2	1	29	279	297	19	2049.06	0h
sp|O00303|EIF3F_HUMAN	R.LHPVILASIVDSYER.R	LHPVILASIVDSYER	3	1	4	94	108	15	1710.93	0h
sp|O00303|EIF3F_HUMAN	R.TMGVMFTPLTVK.Y	TMGVMFTPLTVK	2	1	9	227	238	12	1323.69	0h
sp|O00303|EIF3F_HUMAN	R.VIGLSSDLQQVGGASAR.I	VIGLSSDLQQVGGASAR	2	1	1	262	278	17	1656.88	0h
sp|O00391|QSOX1_HUMAN	X.IYMADLESALHYILR.X	IYMADLESALHYILR	2	1	15	299	313	15	1806.93	0h
sp|O00391|QSOX1_HUMAN	R.LDVPVWDVEATLNFLK.A	LDVPVWDVEATLNFLK	2	1	7	517	532	16	1857.98	0h
sp|O00391|QSOX1_HUMAN	R.VGSPNAAVLWLWSSHNR.V	VGSPNAAVLWLWSSHNR	2	1	2	467	483	17	1892.96	0h
sp|O00410|IPO5_HUMAN	X.FYFHDGVR.X	FYFHDGVR	1	0.9957	2	713	720	8	1039.48	0h
sp|O00410|IPO5_HUMAN	X.SLLIPYLDNLVK.X	SLLIPYLDNLVK	1	0.9984	3	476	487	12	1386.81	0h
sp|O00410|IPO5_HUMAN	R.ATAAFILANEHNVALFK.H	ATAAFILANEHNVALFK	1	0.9991	11	196	212	17	1828.98	0h
sp|O00410|IPO5_HUMAN	X.HLHSIMVLK.X	HLHSIMVLK	1	0.9991	7	488	496	9	1076.61	0h
sp|O00410|IPO5_HUMAN	X.ITFLLQAIR.X	ITFLLQAIR	13	0.9991	6	42	50	9	1073.66	0h
sp|O00410|IPO5_HUMAN	K.HIVENAVQK.E	HIVENAVQK	1	0.9998	3	540	548	9	1036.57	0h
sp|O00410|IPO5_HUMAN	K.AIGTEPDSDVLSEIMHSFAK.C	AIGTEPDSDVLSEIMHSFAK	1	1	18	756	775	20	2146.02	0h
sp|O00410|IPO5_HUMAN	K.FLFDSVSSQNVGLR.E	FLFDSVSSQNVGLR	4	1	4	135	148	14	1567.8	0h
sp|O00410|IPO5_HUMAN	K.FMQDASDVMQLLLK.T	FMQDASDVMQLLLK	1	1	11	573	586	14	1637.81	0h
sp|O00410|IPO5_HUMAN	R.LLSSAFDEVYPALPSDVQTAIK.S	LLSSAFDEVYPALPSDVQTAIK	9	1	4	69	90	22	2363.22	0h
sp|O00410|IPO5_HUMAN	K.LVLEQVVTSIASVADTAEEK.F	LVLEQVVTSIASVADTAEEK	1	1	8	507	526	20	2101.11	0h
sp|O00410|IPO5_HUMAN	X.NLIDEDGNNQWPEGLK.X	NLIDEDGNNQWPEGLK	5	1	4	119	134	16	1840.86	0h
sp|O00410|IPO5_HUMAN	K.VIAALLQTMEDQGNQR.V	VIAALLQTMEDQGNQR	1	1	11	442	457	16	1785.9	0h
sp|O00410|IPO5_HUMAN	K.VSDILHSIFSSYK.E	VSDILHSIFSSYK	1	1	14	842	854	13	1494.77	0h
sp|O00423|EMAL1_HUMAN	R.TGSTSSSSSGKK.N	TGSTSSSSSGKK	1	0.9389	2	158	169	12	1112.53	0h
sp|O00425|IF2B3_HUMAN	R.KIQEILTQVK.Q	KIQEILTQVK	1	0.9042	1	552	561	10	1198.73	0h
sp|O00425|IF2B3_HUMAN	X.MVIITGPPEAQFK.X	MVIITGPPEAQFK	5	0.9998	2	453	465	13	1429.76	0h
sp|O00425|IF2B3_HUMAN	K.ITISPLQELTLYNPER.T	ITISPLQELTLYNPER	1	1	4	310	325	16	1886.02	0h
sp|O00425|IF2B3_HUMAN	K.LYIGNLSENAAPSDLESIFK.D	LYIGNLSENAAPSDLESIFK	1	1	1	4	23	20	2180.1	0h
sp|O00429|DNM1L_HUMAN	X.SATLLQLITK.X	SATLLQLITK	3	0.9894	2	330	339	10	1086.66	0h
sp|O00429|DNM1L_HUMAN	X.LYTDFDEIRQEIENETER.X	LYTDFDEIRQEIENETER	3	0.9982	1	100	117	18	2299.06	0h
sp|O00429|DNM1L_HUMAN	K.IFSPNVVNLTLVDLPGMTK.V	IFSPNVVNLTLVDLPGMTK	2	1	9	134	152	19	2057.12	0h
sp|O00429|DNM1L_HUMAN	K.LDLMDAGTDAMDVLMGR.V	LDLMDAGTDAMDVLMGR	2	1	11	217	233	17	1822.82	0h
sp|O00429|DNM1L_HUMAN	R.LPVTNEMVHNLVAIELAYINTK.H	LPVTNEMVHNLVAIELAYINTK	3	1	10	476	497	22	2481.33	0h
sp|O00429|DNM1L_HUMAN	X.SSLLDDLLTESEDMAQR.X	SSLLDDLLTESEDMAQR	3	1	3	693	709	17	1921.89	0h
sp|O00442|RTC1_HUMAN	X.GVNADKVGIEAAEMLLANLR.X	GVNADKVGIEAAEMLLANLR	1	1	1	267	286	20	2083.11	0h
sp|O00487|PSDE_HUMAN	R.AGVPMEVMGLMLGEFVDDYTVR.V	AGVPMEVMGLMLGEFVDDYTVR	2	1	11	47	68	22	2428.14	0h
sp|O00487|PSDE_HUMAN	X.AVAVVVDPIQSVK.X	AVAVVVDPIQSVK	1	1	2	140	152	13	1323.77	0h
sp|O00487|PSDE_HUMAN	K.AVEEEDKMTPEQLAIK.N	AVEEEDKMTPEQLAIK	1	1	1	258	273	16	1829.91	0h
sp|O00487|PSDE_HUMAN	R.LGGGMPGLGQGPPTDAPAVDTAEQVYISSLALLK.M	LGGGMPGLGQGPPTDAPAVDTAEQVYISSLALLK	2	1	2	7	40	34	3322.71	0h
sp|O00566|MPP10_HUMAN	K.AGDIKTAAEK.T	AGDIKTAAEK	2	0.9793	1	560	569	10	1002.53	0h
sp|O00567|NOP56_HUMAN	R.LAQFIGNR.R	LAQFIGNR	2	0.9896	1	213	220	8	917.507	0h
sp|O00567|NOP56_HUMAN	K.VLLGVGDPK.I	VLLGVGDPK	2	0.9986	2	91	99	9	896.53	0h
sp|O00567|NOP56_HUMAN	X.LLLETHLPSK.X	LLLETHLPSK	2	0.9987	7	78	87	10	1149.67	0h
sp|O00567|NOP56_HUMAN	K.YPASTVQILGAEK.A	YPASTVQILGAEK	2	0.9999	1	321	333	13	1375.73	0h
sp|O00567|NOP56_HUMAN	K.MSQVAPSLSALIGEAVGAR.L	MSQVAPSLSALIGEAVGAR	2	1	11	289	307	19	1855.98	0h
sp|O00567|NOP56_HUMAN	X.STPKEETVNDPEEAGHR.X	STPKEETVNDPEEAGHR	1	1	12	537	553	17	1894.87	0h
sp|O00567|NOP56_HUMAN	R.VDNMIIQSISLLDQLDK.D	VDNMIIQSISLLDQLDK	2	1	1	164	180	17	1944.02	0h
sp|O00567|NOP56_HUMAN	R.VDNMIIQSISLLDQLDKDINTFSMR.V	VDNMIIQSISLLDQLDKDINTFSMR	2	1	15	164	188	25	2908.47	0h
sp|O00571|DDX3X_HUMAN	X.DREEALHQFR.X	DREEALHQFR	3	0.9899	1	479	488	10	1299.63	0h
sp|O00571|DDX3X_HUMAN	K.DLLDLLVEAK.Q	DLLDLLVEAK	4	1	14	555	564	10	1127.64	0h
sp|O00571|DDX3X_HUMAN	K.HVINFDLPSDIEEYVHR.I	HVINFDLPSDIEEYVHR	3	1	3	512	528	17	2082.02	0h
sp|O00571|DDX3X_HUMAN	R.SFLLDLLNATGK.D	SFLLDLLNATGK	1	1	15	429	440	12	1290.72	0h
sp|O00571|DDX3X_HUMAN	K.SPILVATAVAAR.G	SPILVATAVAAR	3	1	8	492	503	12	1167.7	0h
sp|O00571|DDX3X_HUMAN	K.TAAFLLPILSQIYSDGPGEALR.A	TAAFLLPILSQIYSDGPGEALR	2	1	24	231	252	22	2331.25	0h
sp|O00574|CXCR6_HUMAN	R.STHWEYYAMTSFHYTIMVTEAIAYLR.A	STHWEYYAMTSFHYTIMVTEAIAYLR	2	0.9703	1	255	280	26	3183.48	0h
sp|O00584|RNT2_HUMAN	X.SWPFNLEEIKDLLPEMR.X	SWPFNLEEIKDLLPEMR	3	0.9984	9	78	94	17	2116.07	0h
sp|O00584|RNT2_HUMAN	R.ELDLNSVLLK.L	ELDLNSVLLK	4	0.9994	9	144	153	10	1142.65	0h
sp|O00584|RNT2_HUMAN	K.LGIKPSINYYQVADFK.D	LGIKPSINYYQVADFK	4	1	4	154	169	16	1854.98	0h
sp|O00629|IMA4_HUMAN	K.DAQVVQVVLDGLSNILK.M	DAQVVQVVLDGLSNILK	1	1	26	424	440	17	1810.02	0h
sp|O00754|MA2B1_HUMAN	R.DGSLELMVHR.R	DGSLELMVHR	1	0.9868	2	806	815	10	1155.57	0h
sp|O00754|MA2B1_HUMAN	K.NDIQHAGVQYILDSVISALLADPTRR.F	NDIQHAGVQYILDSVISALLADPTRR	1	0.9991	2	90	115	26	2864.51	0h
sp|O00754|MA2B1_HUMAN	R.DLFSTFTITR.L	DLFSTFTITR	1	0.9999	7	941	950	10	1199.62	0h
sp|O00754|MA2B1_HUMAN	R.FQVIVYNPLGR.K	FQVIVYNPLGR	1	0.9999	7	510	520	11	1304.72	0h
sp|O00754|MA2B1_HUMAN	R.LQETTLVANQLR.E	LQETTLVANQLR	1	0.9999	8	951	962	12	1384.77	0h
sp|O00754|MA2B1_HUMAN	X.ATFDPDTGLLMEIMNMNQQLLLPVR.X	ATFDPDTGLLMEIMNMNQQLLLPVR	1	1	7	614	638	25	2859.43	0h
sp|O00754|MA2B1_HUMAN	R.DLPPSVHLLTLASWGPEMVLLR.L	DLPPSVHLLTLASWGPEMVLLR	1	1	14	895	916	22	2443.33	0h
sp|O00754|MA2B1_HUMAN	R.IYITDGNMQLTVLTDR.S	IYITDGNMQLTVLTDR	1	1	3	782	797	16	1851.94	0h
sp|O00754|MA2B1_HUMAN	X.NDIQHAGVQYILDSVISALLADPTR.X	NDIQHAGVQYILDSVISALLADPTR	1	1	4	90	114	25	2708.41	0h
sp|O00754|MA2B1_HUMAN	K.TVDQYFYGIK.N	TVDQYFYGIK	1	1	7	80	89	10	1232.61	0h
sp|O00754|MA2B1_HUMAN	R.VAWHIDPFGHSR.E	VAWHIDPFGHSR	1	1	14	191	202	12	1420.7	0h
sp|O00764|PDXK_HUMAN	K.VVPLADIITPNQFEAELLSGR.K	VVPLADIITPNQFEAELLSGR	3	0.9999	1	140	160	21	2281.23	0h
sp|O14561|ACPM_HUMAN	X.LYDKIDPEK.X	LYDKIDPEK	1	0.9975	14	89	97	9	1119.58	0h
sp|O14561|ACPM_HUMAN	K.LSVNSHFMK.D	LSVNSHFMK	1	0.9992	3	98	106	9	1061.53	0h
sp|O14562|UBFD1_HUMAN	R.LPTVPLSGMYNK.S	LPTVPLSGMYNK	1	0.9965	1	213	224	12	1318.69	0h
sp|O14579|COPE_HUMAN	R.MQDLDEDATLTQLATAWVSLATGGEK.L	MQDLDEDATLTQLATAWVSLATGGEK	2	1	14	172	197	26	2763.33	0h
sp|O14602|IF1AY_HUMAN	X.DYQDNKADVILK.X	DYQDNKADVILK	2	1	4	83	94	12	1420.72	0h
sp|O14656|TOR1A_HUMAN	R.NLIDYFVPFLPLEYK.H	NLIDYFVPFLPLEYK	3	0.9966	1	261	275	15	1869.99	0h
sp|O14732|IMPA2_HUMAN	K.TSAADLVTETDHLVEDLIISELR.E	TSAADLVTETDHLVEDLIISELR	2	1	14	48	70	23	2539.3	0h
sp|O14735|CDIPT_HUMAN	X.SLISVIHLITAAR.X	SLISVIHLITAAR	3	0.9898	1	187	199	13	1392.84	0h
sp|O14737|PDCD5_HUMAN	K.HGDPGDAAQQEAK.H	HGDPGDAAQQEAK	3	1	16	21	33	13	1322.58	0h
sp|O14737|PDCD5_HUMAN	R.LSNLALVKPEK.T	LSNLALVKPEK	2	1	6	56	66	11	1210.73	0h
sp|O14744|ANM5_HUMAN	X.AAILPTSIFLTNKK.X	AAILPTSIFLTNKK	3	0.9985	1	228	241	14	1515.9	0h
sp|O14744|ANM5_HUMAN	K.AAILPTSIFLTNK.K	AAILPTSIFLTNK	3	0.9999	3	228	240	13	1387.81	0h
sp|O14744|ANM5_HUMAN	X.GYEDYLQSPLQPLMDNLESQTYEVFEKDPIK.X	GYEDYLQSPLQPLMDNLESQTYEVFEKDPIK	4	1	15	303	333	31	3688.75	0h
sp|O14744|ANM5_HUMAN	R.VPLVAPEDLR.D	VPLVAPEDLR	4	1	1	155	164	10	1107.63	0h
sp|O14745|NHRF1_HUMAN	R.LVEPGSPAEK.A	LVEPGSPAEK	1	0.9992	2	41	50	10	1025.54	0h
sp|O14745|NHRF1_HUMAN	R.LLVVDPETDEQLQK.L	LLVVDPETDEQLQK	2	1	5	88	101	14	1625.85	0h
sp|O14773|TPP1_HUMAN	R.LFGGNFAHQASVAR.V	LFGGNFAHQASVAR	5	0.9716	3	246	259	14	1473.74	0h
sp|O14773|TPP1_HUMAN	X.PSYQEEAVTK.X	PSYQEEAVTK	5	0.9891	6	419	428	10	1150.55	0h
sp|O14773|TPP1_HUMAN	R.VPIPWVSGTSASTPVFGGILSLINEHR.I	VPIPWVSGTSASTPVFGGILSLINEHR	5	1	13	466	492	27	2833.51	0h
sp|O14776|TCRG1_HUMAN	X.VFFYNPTTR.X	VFFYNPTTR	1	0.9684	1	544	552	9	1143.57	0h
sp|O14776|TCRG1_HUMAN	R.EALFNEFVAAAR.K	EALFNEFVAAAR	1	1	2	770	781	12	1336.68	0h
sp|O14787|TNPO2_HUMAN	X.DNEEKDSAFR.X	DNEEKDSAFR	4	0.9041	1	813	822	10	1209.53	0h
sp|O14787|TNPO2_HUMAN	X.EVLASHLVQLIPILVNGMK.X	EVLASHLVQLIPILVNGMK	3	0.9993	3	289	307	19	2073.2	0h
sp|O14818|PSA7_HUMAN	X.ILNPEEIEK.X	ILNPEEIEK	2	0.988	3	219	227	9	1083.58	0h
sp|O14818|PSA7_HUMAN	X.LYQTDPSGTYHAWK.X	LYQTDPSGTYHAWK	3	0.9983	3	144	157	14	1665.78	0h
sp|O14818|PSA7_HUMAN	R.GRDIVVLGVEK.K	GRDIVVLGVEK	2	0.9993	3	37	47	11	1183.69	0h
sp|O14818|PSA7_HUMAN	X.AITVFSPDGHLFQVEYAQEAVKK.X	AITVFSPDGHLFQVEYAQEAVKK	3	1	2	6	28	23	2576.32	0h
sp|O14818|PSA7_HUMAN	X.LTVEDPVTVEYITR.X	LTVEDPVTVEYITR	4	1	8	96	109	14	1633.86	0h
sp|O14818|PSA7_HUMAN	X.RPFGISALIVGFDFDGTPR.X	RPFGISALIVGFDFDGTPR	2	1	9	125	143	19	2064.08	0h
sp|O14818|PSA7_HUMAN	K.YVAEIEKEKEENEK.K	YVAEIEKEKEENEK	2	1	6	228	241	14	1736.85	0h
sp|O14828|SCAM3_HUMAN	R.ELQHAALGGTATR.Q	ELQHAALGGTATR	1	1	14	119	131	13	1323.69	0h
sp|O14828|SCAM3_HUMAN	R.QYATLDVYNPFETR.E	QYATLDVYNPFETR	1	1	1	34	47	14	1715.82	0h
sp|O14828|SCAM3_HUMAN	R.TAAANAAAGAAENAFR.A	TAAANAAAGAAENAFR	1	1	5	330	345	16	1475.71	0h
sp|O14920|IKKB_HUMAN	R.EGAILTLLSDIASALR.Y	EGAILTLLSDIASALR	4	1	14	119	134	16	1641.93	0h
sp|O14925|TIM23_HUMAN	R.GGLTGLTLTSLYALYNNWEHMK.G	GGLTGLTLTSLYALYNNWEHMK	3	1	2	180	201	22	2481.23	0h
sp|O14929|HAT1_HUMAN	R.VSQMLILTPFQGQGHGAQLLETVHR.Y	VSQMLILTPFQGQGHGAQLLETVHR	1	0.9791	1	238	262	25	2759.45	0h
sp|O14929|HAT1_HUMAN	K.LRDFVLVK.L	LRDFVLVK	1	0.9971	1	285	292	8	988.604	0h
sp|O14929|HAT1_HUMAN	R.LLVTDMSDAEQYR.S	LLVTDMSDAEQYR	1	1	7	337	349	13	1539.72	0h
sp|O14929|HAT1_HUMAN	R.YYTEFPTVLDITAEDPSK.S	YYTEFPTVLDITAEDPSK	1	1	9	263	280	18	2087.99	0h
sp|O14950|ML12B_HUMAN	X.LNGTDPEDVIR.X	LNGTDPEDVIR	4	0.9991	3	94	104	11	1227.61	0h
sp|O14950|ML12B_HUMAN	X.DGFIDKEDLHDMLASLGK.X	DGFIDKEDLHDMLASLGK	4	1	9	46	63	18	2002.96	0h
sp|O14950|ML12B_HUMAN	X.FTDEEVDELYR.X	FTDEEVDELYR	3	1	7	134	144	11	1414.62	0h
sp|O14975|S27A2_HUMAN	K.VLLVSPELQAAVEEILPSLK.K	VLLVSPELQAAVEEILPSLK	2	1	8	154	173	20	2147.24	0h
sp|O14976|GAK_HUMAN	R.LSIAEVVHQLQEIAAAR.N	LSIAEVVHQLQEIAAAR	2	1	12	304	320	17	1847.03	0h
sp|O14979|HNRDL_HUMAN	K.VFVGGLSPDTSEEQIK.E	VFVGGLSPDTSEEQIK	1	0.9042	1	235	250	16	1704.86	0h
sp|O14979|HNRDL_HUMAN	K.MFIGGLSWDTSKK.D	MFIGGLSWDTSKK	1	1	10	150	162	13	1468.73	0h
sp|O14979|HNRDL_HUMAN	K.VFVGGLSPDTSEEQIKEYFGAFGEIENIELPMDTK.T	VFVGGLSPDTSEEQIKEYFGAFGEIENIELPMDTK	1	1	3	235	269	35	3888.86	0h
sp|O14980|XPO1_HUMAN	R.MAQEVLTHLK.E	MAQEVLTHLK	8	0.9801	2	45	54	10	1168.63	0h
sp|O14980|XPO1_HUMAN	X.AIIASNIMYIVGQYPR.X	AIIASNIMYIVGQYPR	1	1	4	538	553	16	1807.96	0h
sp|O14980|XPO1_HUMAN	K.EFAGEDTSDLFLEER.E	EFAGEDTSDLFLEER	1	1	1	1024	1038	15	1756.78	0h
sp|O14980|XPO1_HUMAN	R.EPEVLSTMAIIVNK.L	EPEVLSTMAIIVNK	1	1	2	797	810	14	1542.83	0h
sp|O14980|XPO1_HUMAN	K.ISTSLNPGNPVNNQIFLQEYVANLLK.S	ISTSLNPGNPVNNQIFLQEYVANLLK	1	1	2	958	983	26	2885.53	0h
sp|O14980|XPO1_HUMAN	K.LFVTGLFSLNQDIPAFK.E	LFVTGLFSLNQDIPAFK	1	1	13	996	1012	17	1909.03	0h
sp|O14980|XPO1_HUMAN	K.LNMILVQILK.Q	LNMILVQILK	2	1	3	130	139	10	1183.73	0h
sp|O14980|XPO1_HUMAN	K.LVLDSIIWAFK.H	LVLDSIIWAFK	1	1	13	873	883	11	1303.75	0h
sp|O14980|XPO1_HUMAN	K.NVDILKDPETVK.Q	NVDILKDPETVK	1	1	9	675	686	12	1369.74	0h
sp|O14980|XPO1_HUMAN	K.YMLLPNQVWDSIIQQATK.N	YMLLPNQVWDSIIQQATK	1	1	15	657	674	18	2147.11	0h
sp|O14980|XPO1_HUMAN	K.YYGLQILENVIK.T	YYGLQILENVIK	6	1	7	77	88	12	1451.8	0h
sp|O15027|SC16A_HUMAN	K.SILTQPHLYSPVLISQLVQMASQLR.L	SILTQPHLYSPVLISQLVQMASQLR	1	1	2	1654	1678	25	2821.55	0h
sp|O15042|SR140_HUMAN	R.LYLVSDVLYNSSAK.V	LYLVSDVLYNSSAK	3	0.9865	1	595	608	14	1570.82	0h
sp|O15049|N4BP3_HUMAN	R.QPDGLLRKGLGQR.E	QPDGLLRKGLGQR	1	0.9152	1	41	53	13	1436.82	0h
sp|O15067|PUR4_HUMAN	R.DFLTHVSAR.E	DFLTHVSAR	1	0.9693	1	573	581	9	1044.53	0h
sp|O15067|PUR4_HUMAN	X.LAVAEALTNLVFALVTDLR.X	LAVAEALTNLVFALVTDLR	1	1	6	742	760	19	2028.16	0h
sp|O15067|PUR4_HUMAN	R.NPSTVEAFDLAQSNSEHSR.H	NPSTVEAFDLAQSNSEHSR	1	1	1	213	231	19	2087.95	0h
sp|O15143|ARC1B_HUMAN	R.NAYVWTLK.G	NAYVWTLK	8	0.9564	2	75	82	8	993.526	0h
sp|O15143|ARC1B_HUMAN	R.TWKPTLVILR.I	TWKPTLVILR	7	0.9991	8	85	94	10	1225.75	0h
sp|O15143|ARC1B_HUMAN	K.ASSEGGTAAGAGLDSLHK.N	ASSEGGTAAGAGLDSLHK	2	1	10	309	326	18	1627.78	0h
sp|O15143|ARC1B_HUMAN	K.EHNGQVTGIDWAPESNR.I	EHNGQVTGIDWAPESNR	8	1	4	50	66	17	1908.87	0h
sp|O15143|ARC1B_HUMAN	K.NSVSQISVLSGGK.A	NSVSQISVLSGGK	2	1	10	327	339	13	1274.68	0h
sp|O15144|ARPC2_HUMAN	X.YFQFQEEGK.X	YFQFQEEGK	3	0.9892	1	128	136	9	1174.53	0h
sp|O15144|ARPC2_HUMAN	K.DSIVHQAGMLKR.N	DSIVHQAGMLKR	3	0.9934	1	107	118	12	1353.72	0h
sp|O15144|ARPC2_HUMAN	R.ASHTAPQVLFSHR.E	ASHTAPQVLFSHR	3	0.9949	1	191	203	13	1449.75	0h
sp|O15144|ARPC2_HUMAN	-.MILLEVNNR.I	MILLEVNNR	3	0.9999	4	1	9	9	1100.6	0h
sp|O15144|ARPC2_HUMAN	X.DNTINLIHTFR.X	DNTINLIHTFR	2	1	5	238	248	11	1342.7	0h
sp|O15144|ARPC2_HUMAN	K.DSIVHQAGMLK.R	DSIVHQAGMLK	3	1	12	107	117	11	1197.62	0h
sp|O15144|ARPC2_HUMAN	K.DTDAAVGDNIGYITFVLFPR.H	DTDAAVGDNIGYITFVLFPR	2	1	11	211	230	20	2183.09	0h
sp|O15144|ARPC2_HUMAN	X.EPPLELKDTDAAVGDNIGYITFVLFPR.X	EPPLELKDTDAAVGDNIGYITFVLFPR	2	1	1	204	230	27	2989.54	0h
sp|O15144|ARPC2_HUMAN	R.VYGSFLVNPESGYNVSLLYDLENLPASK.D	VYGSFLVNPESGYNVSLLYDLENLPASK	3	1	15	79	106	28	3087.54	0h
sp|O15145|ARPC3_HUMAN	K.VFDPQNDKPSK.W	VFDPQNDKPSK	1	0.9988	3	148	158	11	1273.63	0h
sp|O15145|ARPC3_HUMAN	K.DTDIVDEAIYYFK.A	DTDIVDEAIYYFK	2	1	12	38	50	13	1590.74	0h
sp|O15145|ARPC3_HUMAN	X.EMYTLGITNFPIPGEPGFPLNAIYAK.X	EMYTLGITNFPIPGEPGFPLNAIYAK	1	1	7	94	119	26	2852.44	0h
sp|O15145|ARPC3_HUMAN	K.LIGNMALLPIR.S	LIGNMALLPIR	2	1	6	15	25	11	1209.72	0h
sp|O15145|ARPC3_HUMAN	X.PANKQEDEVMR.X	PANKQEDEVMR	1	1	14	120	130	11	1315.62	0h
sp|O15145|ARPC3_HUMAN	X.PAYHSSLMDPDTK.X	PAYHSSLMDPDTK	2	1	3	2	14	13	1460.66	0h
sp|O15155|BET1_HUMAN	K.SLSIEIGHEVK.T	SLSIEIGHEVK	5	0.9858	1	48	58	11	1210.65	0h
sp|O15160|RPAC1_HUMAN	X.LLPDITLLEPVEGEAAEELSR.X	LLPDITLLEPVEGEAAEELSR	2	1	2	235	255	21	2293.21	0h
sp|O15160|RPAC1_HUMAN	X.VDVVHMDENSLEFDMVGIDAAIANAFR.X	VDVVHMDENSLEFDMVGIDAAIANAFR	2	1	1	51	77	27	2977.39	0h
sp|O15173|PGRC2_HUMAN	R.GLGAGAGAGEESPATSLPR.M	GLGAGAGAGEESPATSLPR	1	1	10	79	97	19	1696.84	0h
sp|O15212|PFD6_HUMAN	K.LLGPVLVK.Q	LLGPVLVK	3	0.9855	2	59	66	8	837.566	0h
sp|O15260|SURF4_HUMAN	K.QYLPHVAR.L	QYLPHVAR	3	0.9764	1	23	30	8	982.534	0h
sp|O15260|SURF4_HUMAN	X.GQNDLMGTAEDFADQFLR.X	GQNDLMGTAEDFADQFLR	3	1	26	2	19	18	2026.9	0h
sp|O15260|SURF4_HUMAN	R.NLALGGGLLLLLAESR.S	NLALGGGLLLLLAESR	3	1	9	120	135	16	1608.95	0h
sp|O15347|HMGB3_HUMAN	X.STNPGISIGDVAK.X	STNPGISIGDVAK	4	0.9984	4	113	125	13	1257.65	0h
sp|O15347|HMGB3_HUMAN	K.SKFDEMAK.A	SKFDEMAK	4	0.9987	19	58	65	8	954.445	0h
sp|O15355|PPM1G_HUMAN	X.AYTGFSSNSER.X	AYTGFSSNSER	2	0.9825	1	210	220	11	1217.53	0h
sp|O15355|PPM1G_HUMAN	X.QLIVANAGDSR.X	QLIVANAGDSR	3	0.988	4	340	350	11	1142.6	0h
sp|O15355|PPM1G_HUMAN	R.ETPSQENGPTAK.A	ETPSQENGPTAK	2	0.9944	1	198	209	12	1257.58	0h
sp|O15355|PPM1G_HUMAN	X.NLPPEEQMISALPDIK.X	NLPPEEQMISALPDIK	3	0.9991	1	410	425	16	1793.92	0h
sp|O15355|PPM1G_HUMAN	K.ALEDAFLAIDAK.L	ALEDAFLAIDAK	2	1	4	93	104	12	1275.67	0h
sp|O15355|PPM1G_HUMAN	R.LPLPYGFSAMQGWR.V	LPLPYGFSAMQGWR	2	1	1	23	36	14	1621.81	0h
sp|O15355|PPM1G_HUMAN	R.NTAELQPESGKR.K	NTAELQPESGKR	3	1	4	509	520	12	1328.67	0h
sp|O15355|PPM1G_HUMAN	K.VADEDDVDNEEAALLHEEATMTIEELLTR.Y	VADEDDVDNEEAALLHEEATMTIEELLTR	2	1	1	131	159	29	3270.51	0h
sp|O15372|EIF3H_HUMAN	R.VDEMSQDIVK.Y	VDEMSQDIVK	4	0.9992	2	250	259	10	1162.55	0h
sp|O15372|EIF3H_HUMAN	K.EGTGSTATSSSSTAGAAGK.G	EGTGSTATSSSSTAGAAGK	8	1	15	6	24	19	1626.73	0h
sp|O15372|EIF3H_HUMAN	X.NSHLINVLMWELEK.X	NSHLINVLMWELEK	4	1	6	207	220	14	1724.89	0h
sp|O15397|IPO8_HUMAN	X.DGALHVIGSLAEILLK.X	DGALHVIGSLAEILLK	1	0.9992	1	431	446	16	1647.95	0h
sp|O15427|MOT4_HUMAN	X.LHKPPADSGVDLR.X	LHKPPADSGVDLR	1	0.9905	4	429	441	13	1403.75	0h
sp|O15427|MOT4_HUMAN	R.LLDLSVFR.D	LLDLSVFR	1	0.9992	7	217	224	8	961.558	0h
sp|O15446|RPA34_HUMAN	R.HVPLSGSQIVK.G	HVPLSGSQIVK	1	0.9992	1	60	70	11	1163.66	0h
sp|O15446|RPA34_HUMAN	X.GHTVTEPIQPLEPELPGEGQPEAR.X	GHTVTEPIQPLEPELPGEGQPEAR	1	1	1	431	454	24	2580.28	0h
sp|O15498|YKT6_HUMAN	K.IILHNTMESLLER.G	IILHNTMESLLER	2	0.99	1	151	163	13	1567.84	0h
sp|O15511|ARPC5_HUMAN	K.AVQSLDKNGVDLLMK.Y	AVQSLDKNGVDLLMK	2	0.9937	1	94	108	15	1629.87	0h
sp|O15511|ARPC5_HUMAN	K.ALAAGGVGSIVR.V	ALAAGGVGSIVR	1	1	6	132	143	12	1069.62	0h
sp|O15511|ARPC5_HUMAN	K.GFESPSDNSSAMLLQWHEK.A	GFESPSDNSSAMLLQWHEK	2	1	21	113	131	19	2161.97	0h
sp|O15511|ARPC5_HUMAN	R.QGNMTAALQAALK.N	QGNMTAALQAALK	2	1	4	48	60	13	1315.69	0h
sp|O43143|DHX15_HUMAN	R.SLMSADNVR.Q	SLMSADNVR	1	0.9124	1	653	661	9	991.474	0h
sp|O43143|DHX15_HUMAN	R.SNLGSVVLQLK.K	SNLGSVVLQLK	1	0.9983	3	505	515	11	1156.68	0h
sp|O43143|DHX15_HUMAN	X.FAHIDGDHLTLLNVYHAFK.X	FAHIDGDHLTLLNVYHAFK	1	1	1	617	635	19	2210.12	0h
sp|O43143|DHX15_HUMAN	X.HRLDLGEDYPSGK.X	HRLDLGEDYPSGK	1	1	8	5	17	13	1485.72	0h
sp|O43143|DHX15_HUMAN	X.LGIDDLVHFDFMDPPAPETLMR.X	LGIDDLVHFDFMDPPAPETLMR	1	1	8	517	538	22	2528.21	0h
sp|O43148|MCES_HUMAN	K.SVLIGEFLEK.V	SVLIGEFLEK	1	0.9991	2	181	190	10	1133.63	0h
sp|O43148|MCES_HUMAN	R.LSPGGYFIGTTPNSFELIR.R	LSPGGYFIGTTPNSFELIR	1	1	2	308	326	19	2068.06	0h
sp|O43156|TTI1_HUMAN	K.ALADILSESLHSLATSLPR.L	ALADILSESLHSLATSLPR	2	1	9	369	387	19	1993.08	0h
sp|O43169|CYB5B_HUMAN	R.FLNEHPGGEEVLLEQAGVDASESFEDVGHSSDAR.E	FLNEHPGGEEVLLEQAGVDASESFEDVGHSSDAR	2	0.9988	3	51	84	34	3626.64	0h
sp|O43169|CYB5B_HUMAN	K.ELWLVIHGR.V	ELWLVIHGR	2	0.9999	21	36	44	9	1121.63	0h
sp|O43175|SERA_HUMAN	K.SLTGVVNAQALTSAFSPHTKPWIGLAEALGTLMR.A	SLTGVVNAQALTSAFSPHTKPWIGLAEALGTLMR	2	0.9989	1	311	344	34	3536.88	0h
sp|O43175|SERA_HUMAN	K.VTADVINAAEK.L	VTADVINAAEK	2	0.9998	4	59	69	11	1129.6	0h
sp|O43175|SERA_HUMAN	R.AGTGVDNVDLEAATR.K	AGTGVDNVDLEAATR	2	1	7	76	90	15	1487.72	0h
sp|O43175|SERA_HUMAN	R.DLPLLLFR.T	DLPLLLFR	2	1	15	462	469	8	985.595	0h
sp|O43175|SERA_HUMAN	X.GTIQVITQGTSLK.X	GTIQVITQGTSLK	2	1	7	352	364	13	1344.76	0h
sp|O43175|SERA_HUMAN	K.ILQDGGLQVVEK.Q	ILQDGGLQVVEK	1	1	7	22	33	12	1297.72	0h
sp|O43175|SERA_HUMAN	R.LLSYQTSLVSDGETWHVMGISSLLPSLEAWK.Q	LLSYQTSLVSDGETWHVMGISSLLPSLEAWK	2	1	14	492	522	31	3446.74	0h
sp|O43175|SERA_HUMAN	K.NAGNCLSPAVIVGLLK.E	NAGNCLSPAVIVGLLK	2	1	2	365	380	16	1567.87	0h
sp|O43175|SERA_HUMAN	K.QADVNLVNAK.L	QADVNLVNAK	2	1	4	385	394	10	1070.57	0h
sp|O43175|SERA_HUMAN	K.TLGILGLGR.I	TLGILGLGR	2	1	13	147	155	9	898.558	0h
sp|O43175|SERA_HUMAN	R.TQTSDPAMLPTMIGLLAEAGVR.L	TQTSDPAMLPTMIGLLAEAGVR	2	1	29	470	491	22	2271.16	0h
sp|O43242|PSMD3_HUMAN	X.DFLLPFLEEPMDTEADLQFRPR.X	DFLLPFLEEPMDTEADLQFRPR	1	0.9472	4	129	150	22	2678.3	0h
sp|O43242|PSMD3_HUMAN	R.ELDTVTLEDIKEHVK.Q	ELDTVTLEDIKEHVK	1	0.9877	1	66	80	15	1767.92	0h
sp|O43242|PSMD3_HUMAN	X.EQQDLEFAK.X	EQQDLEFAK	1	0.9897	4	515	523	9	1106.52	0h
sp|O43242|PSMD3_HUMAN	X.FNQVLDQFGEK.X	FNQVLDQFGEK	1	1	8	375	385	11	1323.64	0h
sp|O43252|PAPS1_HUMAN	K.LSNNAQNWGMQR.A	LSNNAQNWGMQR	2	0.9596	1	13	24	12	1417.65	0h
sp|O43252|PAPS1_HUMAN	K.VLTMAPGLITLEIVPFR.V	VLTMAPGLITLEIVPFR	2	1	6	545	561	17	1869.08	0h
sp|O43264|ZW10_HUMAN	K.AMGTLLNTAISEVIGK.I	AMGTLLNTAISEVIGK	1	0.9998	6	652	667	16	1616.88	0h
sp|O43290|SNUT1_HUMAN	K.EAAGTTAAAGTGGATEQPPR.H	EAAGTTAAAGTGGATEQPPR	4	1	1	12	31	20	1812.86	0h
sp|O43324|MCA3_HUMAN	K.NDIHTLLK.D	NDIHTLLK	4	0.9982	3	89	96	8	952.533	0h
sp|O43324|MCA3_HUMAN	K.AIVQQWLEYR.V	AIVQQWLEYR	5	1	5	69	78	10	1304.69	0h
sp|O43390|HNRPR_HUMAN	K.ESDLSHVQNK.S	ESDLSHVQNK	3	0.9703	1	85	94	10	1155.55	0h
sp|O43390|HNRPR_HUMAN	X.LMMDPLSGQNR.X	LMMDPLSGQNR	3	0.9895	1	196	206	11	1260.59	0h
sp|O43390|HNRPR_HUMAN	X.VQESTKGPDEAK.X	VQESTKGPDEAK	4	0.9946	2	115	126	12	1287.63	0h
sp|O43390|HNRPR_HUMAN	X.TKENILEEFSK.X	TKENILEEFSK	4	0.9992	1	258	268	11	1336.69	0h
sp|O43390|HNRPR_HUMAN	X.DLYEDELVPLFEK.X	DLYEDELVPLFEK	3	1	10	175	187	13	1608.79	0h
sp|O43390|HNRPR_HUMAN	R.KYGGPPPDSVYSGVQPGIGTEVFVGK.I	KYGGPPPDSVYSGVQPGIGTEVFVGK	2	1	7	146	171	26	2634.33	0h
sp|O43390|HNRPR_HUMAN	X.LKDYAFVHFEDR.X	LKDYAFVHFEDR	4	1	4	373	384	12	1538.75	0h
sp|O43390|HNRPR_HUMAN	R.NLATTVTEEILEK.S	NLATTVTEEILEK	4	1	11	347	359	13	1459.78	0h
sp|O43390|HNRPR_HUMAN	X.STAYEDYYYHPPPR.X	STAYEDYYYHPPPR	4	1	2	428	441	14	1757.77	0h
sp|O43390|HNRPR_HUMAN	K.VTEGLVDVILYHQPDDK.K	VTEGLVDVILYHQPDDK	3	1	16	269	285	17	1939.99	0h
sp|O43390|HNRPR_HUMAN	K.VWGNVVTVEWADPVEEPDPEVMAK.V	VWGNVVTVEWADPVEEPDPEVMAK	4	1	1	316	339	24	2695.28	0h
sp|O43396|TXNL1_HUMAN	R.IDQYQGADAVGLEEK.I	IDQYQGADAVGLEEK	1	1	6	88	102	15	1634.78	0h
sp|O43396|TXNL1_HUMAN	X.VGVKPVGSDPDFQPELSGAGSR.X	VGVKPVGSDPDFQPELSGAGSR	1	1	6	2	23	22	2198.09	0h
sp|O43399|TPD54_HUMAN	K.GLLSDSMTDVPVDTGVAAR.T	GLLSDSMTDVPVDTGVAAR	5	1	14	16	34	19	1902.93	0h
sp|O43399|TPD54_HUMAN	R.LGLSTLGELK.Q	LGLSTLGELK	5	1	1	81	90	10	1029.61	0h
sp|O43423|AN32C_HUMAN	X.IKDLSTIEPLK.X	IKDLSTIEPLK	4	0.9868	7	96	106	11	1255.74	0h
sp|O43432|IF4G3_HUMAN	X.FMLQDVIDLR.X	FMLQDVIDLR	1	0.9756	4	971	980	10	1248.65	0h
sp|O43447|PPIH_HUMAN	X.IELFADVVPK.X	IELFADVVPK	4	0.9974	6	29	38	10	1129.64	0h
sp|O43464|HTRA2_HUMAN	R.AGLRPGDVILAIGEQMVQNAEDVYEAVR.T	AGLRPGDVILAIGEQMVQNAEDVYEAVR	1	1	9	405	432	28	3012.53	0h
sp|O43488|ARK72_HUMAN	R.FYAYNPLAGGLLTGK.Y	FYAYNPLAGGLLTGK	3	1	13	222	236	15	1583.83	0h
sp|O43516|WIPF1_HUMAN	X.PVPPPPAPPPPPTFALANTEKPTLNK.X	PVPPPPAPPPPPTFALANTEKPTLNK	6	0.9038	1	2	27	26	2687.47	0h
sp|O43583|DENR_HUMAN	K.WPEVDDDSIEDLGEVKK.-	WPEVDDDSIEDLGEVKK	1	1	9	182	198	17	1972.92	0h
sp|O43592|XPOT_HUMAN	K.LMLAQDEER.Q	LMLAQDEER	1	0.9992	3	635	643	9	1103.53	0h
sp|O43592|XPOT_HUMAN	R.ALAYFEQLK.I	ALAYFEQLK	1	1	4	21	29	9	1081.58	0h
sp|O43592|XPOT_HUMAN	R.LAQVSPELLLASVR.R	LAQVSPELLLASVR	1	1	3	415	428	14	1494.88	0h
sp|O43598|RCL_HUMAN	R.LIHEQDLEWLQQADVVVAEVTQPSLGVGYELGR.A	LIHEQDLEWLQQADVVVAEVTQPSLGVGYELGR	1	1	1	75	107	33	3690.89	0h
sp|O43615|TIM44_HUMAN	K.TEMSEVLTEILR.V	TEMSEVLTEILR	1	1	6	294	305	12	1419.73	0h
sp|O43615|TIM44_HUMAN	K.VFEPNEEALGVVLHK.D	VFEPNEEALGVVLHK	1	1	14	223	237	15	1679.89	0h
sp|O43615|TIM44_HUMAN	K.VTDLLGGLFSK.T	VTDLLGGLFSK	1	1	5	283	293	11	1148.64	0h
sp|O43670|ZN207_HUMAN	K.LIHPDEDISLEER.R	LIHPDEDISLEER	3	0.9965	2	363	375	13	1564.77	0h
sp|O43670|ZN207_HUMAN	K.ETIDAVPNAIPGR.T	ETIDAVPNAIPGR	3	1	1	60	72	13	1351.71	0h
sp|O43670|ZN207_HUMAN	X.PAASITSKPATLTTTSATSK.X	PAASITSKPATLTTTSATSK	3	1	1	343	362	20	1933.04	0h
sp|O43681|ASNA_HUMAN	X.YLDQMEDLYEDFHIVK.X	YLDQMEDLYEDFHIVK	2	1	9	302	317	16	2056.94	0h
sp|O43684|BUB3_HUMAN	X.LNQPPEDGISSVK.X	LNQPPEDGISSVK	1	0.9271	1	9	21	13	1382.7	0h
sp|O43684|BUB3_HUMAN	K.MHDLNTDQENLVGTHDAPIR.C	MHDLNTDQENLVGTHDAPIR	1	1	9	81	100	20	2275.07	0h
sp|O43684|BUB3_HUMAN	R.VAVEYLDPSPEVQK.K	VAVEYLDPSPEVQK	1	1	2	203	216	14	1572.8	0h
sp|O43707|ACTN4_HUMAN	X.GYEEWLLNEIRR.X	GYEEWLLNEIRR	6	0.9492	3	396	407	12	1576.8	0h
sp|O43707|ACTN4_HUMAN	K.STLPDADRER.E	STLPDADRER	2	0.9698	1	575	584	10	1158.56	0h
sp|O43707|ACTN4_HUMAN	R.DLLLDPAWEK.Q	DLLLDPAWEK	10	0.998	2	41	50	10	1198.62	0h
sp|O43707|ACTN4_HUMAN	R.TINEVENQILTR.D	TINEVENQILTR	5	0.9982	1	746	757	12	1428.76	0h
sp|O43707|ACTN4_HUMAN	K.ASIHEAWTDGK.E	ASIHEAWTDGK	5	0.9987	2	422	432	11	1213.57	0h
sp|O43707|ACTN4_HUMAN	K.ALDFIASK.G	ALDFIASK	7	0.9991	10	115	122	8	863.473	0h
sp|O43707|ACTN4_HUMAN	R.EAILAIHK.E	EAILAIHK	2	0.9992	6	585	592	8	893.532	0h
sp|O43707|ACTN4_HUMAN	X.VEQIAAIAQELNELDYYDSHNVNTR.X	VEQIAAIAQELNELDYYDSHNVNTR	1	0.9996	1	470	494	25	2904.39	0h
sp|O43707|ACTN4_HUMAN	R.FAIQDISVEETSAK.E	FAIQDISVEETSAK	8	0.9999	1	153	166	14	1536.77	0h
sp|O43707|ACTN4_HUMAN	K.AGTQIENIDEDFRDGLK.L	AGTQIENIDEDFRDGLK	4	1	9	67	83	17	1919.92	0h
sp|O43707|ACTN4_HUMAN	K.AIMTYVSSFYHAFSGAQK.A	AIMTYVSSFYHAFSGAQK	6	1	27	256	273	18	2006.95	0h
sp|O43707|ACTN4_HUMAN	R.ASFNHFDKDHGGALGPEEFK.A	ASFNHFDKDHGGALGPEEFK	2	1	15	772	791	20	2202.01	0h
sp|O43707|ACTN4_HUMAN	K.DGLAFNALIHR.H	DGLAFNALIHR	5	1	12	194	204	11	1225.65	0h
sp|O43707|ACTN4_HUMAN	R.ETTDTDTADQVIASFK.V	ETTDTDTADQVIASFK	2	1	4	838	853	16	1740.81	0h
sp|O43707|ACTN4_HUMAN	K.GISQEQMQEFR.A	GISQEQMQEFR	2	1	1	761	771	11	1351.62	0h
sp|O43707|ACTN4_HUMAN	K.GYEEWLLNEIR.R	GYEEWLLNEIR	6	1	5	396	406	11	1420.7	0h
sp|O43707|ACTN4_HUMAN	X.HRDYETATLSDIK.X	HRDYETATLSDIK	2	1	11	438	450	13	1547.76	0h
sp|O43707|ACTN4_HUMAN	R.HRPELIEYDK.L	HRPELIEYDK	3	1	3	205	214	10	1298.66	0h
sp|O43707|ACTN4_HUMAN	K.HTNYTMEHIR.V	HTNYTMEHIR	6	1	18	724	733	10	1300.6	0h
sp|O43707|ACTN4_HUMAN	R.KAGTQIENIDEDFRDGLK.L	KAGTQIENIDEDFRDGLK	4	1	7	66	83	18	2048.01	0h
sp|O43707|ACTN4_HUMAN	R.KDDPVTNLNNAFEVAEK.Y	KDDPVTNLNNAFEVAEK	3	1	23	217	233	17	1902.93	0h
sp|O43707|ACTN4_HUMAN	K.LASDLLEWIR.R	LASDLLEWIR	6	1	2	301	310	10	1214.66	0h
sp|O43707|ACTN4_HUMAN	K.LMLLLEVISGER.L	LMLLLEVISGER	8	1	10	84	95	12	1371.78	0h
sp|O43707|ACTN4_HUMAN	K.LVSIGAEEIVDGNAK.M	LVSIGAEEIVDGNAK	3	1	15	126	140	15	1513.8	0h
sp|O43707|ACTN4_HUMAN	K.MLDAEDIVNTARPDEK.A	MLDAEDIVNTARPDEK	3	1	16	240	255	16	1815.87	0h
sp|O43707|ACTN4_HUMAN	K.MVSDINNGWQHLEQAEK.G	MVSDINNGWQHLEQAEK	2	1	18	379	395	17	1997.92	0h
sp|O43707|ACTN4_HUMAN	K.NVNVQNFHISWK.D	NVNVQNFHISWK	3	1	4	182	193	12	1484.75	0h
sp|O43707|ACTN4_HUMAN	R.QFASQANVVGPWIQTK.M	QFASQANVVGPWIQTK	2	1	5	653	668	16	1772.92	0h
sp|O43707|ACTN4_HUMAN	K.QLEAIDQLHLEYAK.R	QLEAIDQLHLEYAK	2	1	9	522	535	14	1669.87	0h
sp|O43707|ACTN4_HUMAN	K.RDHALLEEQSK.Q	RDHALLEEQSK	2	1	7	633	643	11	1324.67	0h
sp|O43707|ACTN4_HUMAN	X.SIVDYKPNLDLLEQQHQLIQEALIFDNK.X	SIVDYKPNLDLLEQQHQLIQEALIFDNK	2	1	3	696	723	28	3323.74	0h
sp|O43707|ACTN4_HUMAN	R.VGWEQLLTTIAR.T	VGWEQLLTTIAR	5	1	12	734	745	12	1385.77	0h
sp|O43707|ACTN4_HUMAN	K.VLAGDKNFITAEELR.R	VLAGDKNFITAEELR	2	1	3	854	868	15	1674.89	0h
sp|O43707|ACTN4_HUMAN	K.VLAVNQENEHLMEDYEK.L	VLAVNQENEHLMEDYEK	3	1	16	284	300	17	2059.95	0h
sp|O43747|AP1G1_HUMAN	X.DDAVPNLIQLITNSVEMHAYTVQR.X	DDAVPNLIQLITNSVEMHAYTVQR	3	0.9953	1	435	458	24	2726.37	0h
sp|O43747|AP1G1_HUMAN	X.NLIMSGYSPEHDVSGISDPFLQVR.X	NLIMSGYSPEHDVSGISDPFLQVR	4	0.9983	1	225	248	24	2660.29	0h
sp|O43759|SNG1_HUMAN	K.AGGAFDPYTLVR.Q	AGGAFDPYTLVR	3	0.9997	1	11	22	12	1265.64	0h
sp|O43765|SGTA_HUMAN	K.HVEAVAYYK.K	HVEAVAYYK	2	0.9381	1	175	183	9	1078.54	0h
sp|O43765|SGTA_HUMAN	K.ALELDPDNETYK.S	ALELDPDNETYK	2	0.9992	2	185	196	12	1406.66	0h
sp|O43765|SGTA_HUMAN	R.LAYAIIQFLHDQLR.H	LAYAIIQFLHDQLR	2	1	15	7	20	14	1699.94	0h
sp|O43768|ENSA_HUMAN	X.YFDSGDYNMAK.X	YFDSGDYNMAK	7	0.9991	2	64	74	11	1309.53	0h
sp|O43776|SYNC_HUMAN	K.ALMTVGKEPFPTIYVDSQKENER.W	ALMTVGKEPFPTIYVDSQKENER	3	0.9227	1	32	54	23	2651.32	0h
sp|O43776|SYNC_HUMAN	K.NDPSLPEPK.C	NDPSLPEPK	3	0.9847	3	105	113	9	995.492	0h
sp|O43776|SYNC_HUMAN	R.IFDSEEILAGYKR.E	IFDSEEILAGYKR	1	0.989	1	479	491	13	1539.79	0h
sp|O43776|SYNC_HUMAN	K.EPFPTIYVDSQK.E	EPFPTIYVDSQK	3	0.9984	2	39	50	12	1422.7	0h
sp|O43776|SYNC_HUMAN	R.IFDSEEILAGYK.R	IFDSEEILAGYK	1	0.9998	4	479	490	12	1383.69	0h
sp|O43776|SYNC_HUMAN	R.FLTWILNR.Y	FLTWILNR	1	0.9999	15	523	530	8	1061.6	0h
sp|O43776|SYNC_HUMAN	K.EDGTFYEFGEDIPEAPER.L	EDGTFYEFGEDIPEAPER	1	1	2	408	425	18	2099.9	0h
sp|O43776|SYNC_HUMAN	R.EGIDPTPYYWYTDQR.K	EGIDPTPYYWYTDQR	1	1	4	492	506	15	1902.84	0h
sp|O43776|SYNC_HUMAN	K.KEDGTFYEFGEDIPEAPER.L	KEDGTFYEFGEDIPEAPER	1	1	3	407	425	19	2227.99	0h
sp|O43776|SYNC_HUMAN	R.LTESVDVLMPNVGEIVGGSMR.I	LTESVDVLMPNVGEIVGGSMR	1	1	10	458	478	21	2202.1	0h
sp|O43776|SYNC_HUMAN	R.MNYSDAIVWLK.E	MNYSDAIVWLK	1	1	3	391	401	11	1338.66	0h
sp|O43776|SYNC_HUMAN	K.SPAGSIVHELNPNFQPPK.R	SPAGSIVHELNPNFQPPK	1	1	14	368	385	18	1930.99	0h
sp|O43809|CPSF5_HUMAN	R.TVEGVLIVHEHR.L	TVEGVLIVHEHR	1	0.9965	5	79	90	12	1387.76	0h
sp|O43809|CPSF5_HUMAN	R.LMTEILGR.Q	LMTEILGR	1	0.9992	13	124	131	8	931.515	0h
sp|O43809|CPSF5_HUMAN	K.LPGGELNPGEDEVEGLKR.L	LPGGELNPGEDEVEGLKR	1	1	5	106	123	18	1907.96	0h
sp|O43809|CPSF5_HUMAN	X.LPHVLLLQLGTTFFK.X	LPHVLLLQLGTTFFK	1	1	16	91	105	15	1726.02	0h
sp|O43809|CPSF5_HUMAN	K.LVAAPLFELYDNAPGYGPIISSLPQLLSR.F	LVAAPLFELYDNAPGYGPIISSLPQLLSR	1	1	6	193	221	29	3113.68	0h
sp|O43809|CPSF5_HUMAN	R.TINLYPLTNYTFGTK.E	TINLYPLTNYTFGTK	1	1	14	36	50	15	1744.9	0h
sp|O43818|U3IP2_HUMAN	R.AFEEDQVAGR.L	AFEEDQVAGR	1	0.9985	1	102	111	10	1120.51	0h
sp|O43823|AKAP8_HUMAN	K.EGGRGGSGGGGEGIQDR.E	EGGRGGSGGGGEGIQDR	1	0.9464	4	106	122	17	1544.69	0h
sp|O43823|AKAP8_HUMAN	K.ETPEEVAADVLAEVITAAVR.A	ETPEEVAADVLAEVITAAVR	1	1	13	568	587	20	2082.08	0h
sp|O43852|CALU_HUMAN	R.HLVYESDQNKDGK.L	HLVYESDQNKDGK	3	1	9	272	284	13	1531.72	0h
sp|O43852|CALU_HUMAN	K.TFDQLTPEESKER.L	TFDQLTPEESKER	3	1	1	60	72	13	1578.75	0h
sp|O43852|CALU_HUMAN	R.VHHEPQLSDK.V	VHHEPQLSDK	3	1	11	28	37	10	1188.59	0h
sp|O43865|SAHH2_HUMAN	R.GIVEESVTGVHR.L	GIVEESVTGVHR	6	0.9989	1	250	261	12	1281.67	0h
sp|O43896|KIF1C_HUMAN	R.AEIEALAALK.M	AEIEALAALK	1	0.9037	1	769	778	10	1027.59	0h
sp|O43914|TYOBP_HUMAN	X.ITETESPYQELQGQR.X	ITETESPYQELQGQR	1	0.9837	1	84	98	15	1777.85	0h
sp|O60216|RAD21_HUMAN	X.LFSLPAQPLWNNR.X	LFSLPAQPLWNNR	1	0.9758	2	372	384	13	1554.83	0h
sp|O60216|RAD21_HUMAN	K.FYSFLVLK.K	FYSFLVLK	6	0.9981	5	597	604	8	1015.57	0h
sp|O60216|RAD21_HUMAN	R.DVIDEPIIEEPSR.L	DVIDEPIIEEPSR	1	1	1	438	450	13	1510.75	0h
sp|O60234|GMFG_HUMAN	K.ETDNAAIIMK.V	ETDNAAIIMK	2	0.9764	1	26	35	10	1104.55	0h
sp|O60234|GMFG_HUMAN	R.QMVVLEEEFQNISPEELK.M	QMVVLEEEFQNISPEELK	2	1	7	41	58	18	2161.06	0h
sp|O60234|GMFG_HUMAN	R.TTDDLTEAWLQEK.L	TTDDLTEAWLQEK	2	1	15	125	137	13	1548.73	0h
sp|O60264|SMCA5_HUMAN	R.LDGQTPHDER.Q	LDGQTPHDER	1	0.9973	2	529	538	10	1166.53	0h
sp|O60264|SMCA5_HUMAN	X.LLNILMQLR.X	LLNILMQLR	5	0.9999	8	446	454	9	1112.67	0h
sp|O60264|SMCA5_HUMAN	K.ESEITDEDIDGILER.G	ESEITDEDIDGILER	1	1	3	666	680	15	1732.8	0h
sp|O60264|SMCA5_HUMAN	X.IAFTEWIEPPKR.X	IAFTEWIEPPKR	1	1	2	725	736	12	1485.8	0h
sp|O60287|NPA1P_HUMAN	X.GLGALLPTLAVDELDTVLLHTLQR.X	GLGALLPTLAVDELDTVLLHTLQR	1	1	14	1183	1206	24	2557.45	0h
sp|O60306|AQR_HUMAN	X.LNLQFLTLHDYLLR.X	LNLQFLTLHDYLLR	1	0.9991	2	455	468	14	1757.98	0h
sp|O60313|OPA1_HUMAN	X.IDQLQEELLHTQLK.X	IDQLQEELLHTQLK	6	0.9985	1	215	228	14	1706.92	0h
sp|O60313|OPA1_HUMAN	R.MVLVDLPGVINTVTSGMAPDTK.E	MVLVDLPGVINTVTSGMAPDTK	6	1	1	394	415	22	2257.17	0h
sp|O60313|OPA1_HUMAN	X.SLIDMYSEVLDVLSDYDASYNTQDHLPR.X	SLIDMYSEVLDVLSDYDASYNTQDHLPR	6	1	1	263	290	28	3258.5	0h
sp|O60341|KDM1A_HUMAN	R.LFFAGEHTIR.N	LFFAGEHTIR	1	0.9967	4	796	805	10	1189.62	0h
sp|O60341|KDM1A_HUMAN	K.APILLALVAGEAAGIMENISDDVIVGR.C	APILLALVAGEAAGIMENISDDVIVGR	1	1	10	700	726	27	2706.46	0h
sp|O60361|NDK8_HUMAN	X.DRPFFPGLVK.X	DRPFFPGLVK	4	1	20	42	51	10	1174.65	0h
sp|O60361|NDK8_HUMAN	X.VMLGETNPADSKPGTIR.X	VMLGETNPADSKPGTIR	7	1	18	74	90	17	1784.91	0h
sp|O60361|NDK8_HUMAN	X.YMNSGPVVAMVWEGLNVVK.X	YMNSGPVVAMVWEGLNVVK	4	1	36	52	70	19	2092.04	0h
sp|O60488|ACSL4_HUMAN	K.AKPTSDKPGSPYR.S	AKPTSDKPGSPYR	6	0.904	1	48	60	13	1402.72	0h
sp|O60493|SNX3_HUMAN	R.YSDFEWLR.S	YSDFEWLR	1	0.9995	2	71	78	8	1114.51	0h
sp|O60493|SNX3_HUMAN	R.KQGLEQFINK.V	KQGLEQFINK	1	1	5	119	128	10	1203.66	0h
sp|O60506|HNRPQ_HUMAN	K.LKDYAFIHFDER.D	LKDYAFIHFDER	1	0.9797	2	370	381	12	1552.77	0h
sp|O60506|HNRPQ_HUMAN	K.EQILEEFSK.V	EQILEEFSK	1	0.9974	6	257	265	9	1121.56	0h
sp|O60506|HNRPQ_HUMAN	R.LFVGSIPK.S	LFVGSIPK	5	0.9992	5	245	252	8	859.514	0h
sp|O60506|HNRPQ_HUMAN	K.AGPIWDLR.L	AGPIWDLR	4	0.9997	6	185	192	8	926.496	0h
sp|O60506|HNRPQ_HUMAN	R.AIEALKEFNEDGALAVLQQFK.D	AIEALKEFNEDGALAVLQQFK	2	1	18	61	81	21	2333.22	0h
sp|O60506|HNRPQ_HUMAN	X.DLEGENIEIVFAKPPDQK.X	DLEGENIEIVFAKPPDQK	1	1	7	395	412	18	2041.04	0h
sp|O60506|HNRPQ_HUMAN	X.DLFEDELVPLFEK.X	DLFEDELVPLFEK	2	1	11	172	184	13	1592.8	0h
sp|O60506|HNRPQ_HUMAN	K.DSDLSHVQNK.S	DSDLSHVQNK	2	1	4	82	91	10	1141.54	0h
sp|O60506|HNRPQ_HUMAN	K.EFNEDGALAVLQQFK.D	EFNEDGALAVLQQFK	2	1	14	67	81	15	1707.85	0h
sp|O60506|HNRPQ_HUMAN	R.KYGGPPPDSVYSGQQPSVGTEIFVGK.I	KYGGPPPDSVYSGQQPSVGTEIFVGK	2	1	8	143	168	26	2693.33	0h
sp|O60506|HNRPQ_HUMAN	R.NLANTVTEEILEK.A	NLANTVTEEILEK	1	1	15	344	356	13	1472.77	0h
sp|O60506|HNRPQ_HUMAN	R.TGYTLDVTTGQR.K	TGYTLDVTTGQR	5	1	5	131	142	12	1310.65	0h
sp|O60506|HNRPQ_HUMAN	K.TKEQILEEFSK.V	TKEQILEEFSK	1	1	4	255	265	11	1350.7	0h
sp|O60506|HNRPQ_HUMAN	X.VAEKLDEIYVAGLVAHSDLDER.X	VAEKLDEIYVAGLVAHSDLDER	2	1	6	39	60	22	2441.24	0h
sp|O60506|HNRPQ_HUMAN	K.VTEGLTDVILYHQPDDK.K	VTEGLTDVILYHQPDDK	1	1	28	266	282	17	1941.97	0h
sp|O60506|HNRPQ_HUMAN	K.VWGNVGTVEWADPIEDPDPEVMAK.V	VWGNVGTVEWADPIEDPDPEVMAK	1	1	18	313	336	24	2653.23	0h
sp|O60506|HNRPQ_HUMAN	K.YGGPPPDSVYSGQQPSVGTEIFVGK.I	YGGPPPDSVYSGQQPSVGTEIFVGK	2	1	3	144	168	25	2565.24	0h
sp|O60518|RNBP6_HUMAN	X.FVPYYDIFMPSLK.X	FVPYYDIFMPSLK	1	0.9838	5	535	547	13	1618.81	0h
sp|O60524|NEMF_HUMAN	K.EVQTVTSIQK.A	EVQTVTSIQK	1	0.9292	3	511	520	10	1131.61	0h
sp|O60610|DIAP1_HUMAN	X.LLSALCILPQPEDMNER.X	LLSALCILPQPEDMNER	8	0.9753	1	262	278	17	1940.97	0h
sp|O60610|DIAP1_HUMAN	R.DVQNFPAATDEKDKFVEK.M	DVQNFPAATDEKDKFVEK	7	0.9758	3	1072	1089	18	2080.01	0h
sp|O60610|DIAP1_HUMAN	K.KLSVEEFFMDLHNFR.N	KLSVEEFFMDLHNFR	7	0.9858	2	1128	1142	15	1910.93	0h
sp|O60610|DIAP1_HUMAN	K.NVILEVNEAVLTESMIQNLIK.Q	NVILEVNEAVLTESMIQNLIK	7	0.9992	2	876	896	21	2369.29	0h
sp|O60610|DIAP1_HUMAN	K.AEPHFLSILQHLLLVR.N	AEPHFLSILQHLLLVR	8	1	22	406	421	16	1885.09	0h
sp|O60610|DIAP1_HUMAN	K.ELGEYFLFDPK.K	ELGEYFLFDPK	7	1	3	1117	1127	11	1356.66	0h
sp|O60610|DIAP1_HUMAN	X.EQLIDMNAEGDETGVMDSLLEALQSGAAFR.X	EQLIDMNAEGDETGVMDSLLEALQSGAAFR	7	1	1	1184	1213	30	3209.48	0h
sp|O60610|DIAP1_HUMAN	R.HLQIEIEGLIDQMIDK.T	HLQIEIEGLIDQMIDK	8	1	1	456	471	16	1893.99	0h
sp|O60610|DIAP1_HUMAN	R.LGLHQVLQDLR.E	LGLHQVLQDLR	8	1	24	341	351	11	1290.74	0h
sp|O60610|DIAP1_HUMAN	K.LSVEEFFMDLHNFR.N	LSVEEFFMDLHNFR	7	1	13	1129	1142	14	1782.84	0h
sp|O60610|DIAP1_HUMAN	R.MEMDDFNEVFQILLNTVK.D	MEMDDFNEVFQILLNTVK	8	1	22	385	402	18	2185.04	0h
sp|O60610|DIAP1_HUMAN	K.TAQNLSIFLGSFR.M	TAQNLSIFLGSFR	7	1	2	856	868	13	1452.77	0h
sp|O60664|PLIN3_HUMAN	R.QHAYEHSLGK.L	QHAYEHSLGK	1	0.9974	3	248	257	10	1168.56	0h
sp|O60664|PLIN3_HUMAN	X.QVEDLQATFSSIHSFQDLSSSILAQSR.X	QVEDLQATFSSIHSFQDLSSSILAQSR	1	0.9992	1	365	391	27	2993.47	0h
sp|O60664|PLIN3_HUMAN	R.AQEALLQLSQVLSLMETVK.Q	AQEALLQLSQVLSLMETVK	1	1	16	265	283	19	2100.15	0h
sp|O60664|PLIN3_HUMAN	R.EALDHMVEYVAQNTPVTWLVGPFAPGITEK.A	EALDHMVEYVAQNTPVTWLVGPFAPGITEK	1	1	15	399	428	30	3311.65	0h
sp|O60664|PLIN3_HUMAN	R.IATSLDGFDVASVQQQR.Q	IATSLDGFDVASVQQQR	1	1	1	214	230	17	1833.92	0h
sp|O60664|PLIN3_HUMAN	K.SEEWADNHLPLTDAELAR.I	SEEWADNHLPLTDAELAR	1	1	1	196	213	18	2065.97	0h
sp|O60664|PLIN3_HUMAN	K.SVVTGGVQSVMGSR.L	SVVTGGVQSVMGSR	1	1	6	167	180	14	1362.69	0h
sp|O60664|PLIN3_HUMAN	K.VSGAQEMVSSAK.D	VSGAQEMVSSAK	1	1	11	129	140	12	1192.57	0h
sp|O60711|LPXN_HUMAN	K.ASLDSMLGGLEQELQDLGIATVPK.G	ASLDSMLGGLEQELQDLGIATVPK	3	1	20	126	149	24	2484.28	0h
sp|O60711|LPXN_HUMAN	K.TSAAAQLDELMAHLTEMQAK.V	TSAAAQLDELMAHLTEMQAK	4	1	1	87	106	20	2158.04	0h
sp|O60762|DPM1_HUMAN	K.LGGNEIVSFLK.G	LGGNEIVSFLK	4	0.9992	1	241	251	11	1175.65	0h
sp|O60763|USO1_HUMAN	X.GVMGGQSAGPQHTEAETIQK.X	GVMGGQSAGPQHTEAETIQK	1	0.9961	1	6	25	20	2024.96	0h
sp|O60763|USO1_HUMAN	R.LEVGIQAMEHLIHVLQTDR.S	LEVGIQAMEHLIHVLQTDR	1	1	7	55	73	19	2201.16	0h
sp|O60763|USO1_HUMAN	K.SSQTSGTNEQSSAIVSAR.D	SSQTSGTNEQSSAIVSAR	1	1	4	765	782	18	1808.85	0h
sp|O60784|TOM1_HUMAN	K.VLNLIQSWADAFR.S	VLNLIQSWADAFR	8	1	10	117	129	13	1531.81	0h
sp|O60812|HNRCL_HUMAN	X.LKGDDLQAIK.X	LKGDDLQAIK	2	0.9754	1	175	184	10	1099.62	0h
sp|O60812|HNRCL_HUMAN	X.AAVAGEDGR.X	AAVAGEDGR	3	1	14	65	73	9	844.402	0h
sp|O60814|H2B1K_HUMAN	X.LLLPGELAK.X	LLLPGELAK	17	0.9899	29	101	109	9	952.594	0h
sp|O60814|H2B1K_HUMAN	X.AMGIMNSFVNDIFER.X	AMGIMNSFVNDIFER	16	1	680	59	73	15	1742.81	0h
sp|O60832|DKC1_HUMAN	K.IMLPGVLR.Y	IMLPGVLR	2	0.9881	1	315	322	8	897.545	0h
sp|O60832|DKC1_HUMAN	K.QEYVDYSESAK.K	QEYVDYSESAK	2	0.9992	1	414	424	11	1317.57	0h
sp|O60832|DKC1_HUMAN	R.KSLPEEDVAEIQHAEEFLIKPESK.V	KSLPEEDVAEIQHAEEFLIKPESK	3	0.9995	3	20	43	24	2765.41	0h
sp|O60832|DKC1_HUMAN	K.AGLESGAEPGDGDSDTTK.K	AGLESGAEPGDGDSDTTK	2	1	1	481	498	18	1705.73	0h
sp|O60832|DKC1_HUMAN	K.APQVVAEAAK.T	APQVVAEAAK	2	1	6	434	443	10	982.543	0h
sp|O60832|DKC1_HUMAN	K.LDTSQWPLLLK.N	LDTSQWPLLLK	3	1	9	47	57	11	1312.74	0h
sp|O60841|IF2P_HUMAN	K.ILPQYIFNSR.D	ILPQYIFNSR	1	0.9715	1	1096	1105	10	1249.68	0h
sp|O60841|IF2P_HUMAN	K.LLQAQGVEVPSK.D	LLQAQGVEVPSK	1	0.9992	6	425	436	12	1267.71	0h
sp|O60841|IF2P_HUMAN	X.IFSAEIIYHLFDAFTK.X	IFSAEIIYHLFDAFTK	1	1	2	1056	1071	16	1913.99	0h
sp|O60841|IF2P_HUMAN	X.IPGMLIIDTPGHESFSNLR.X	IPGMLIIDTPGHESFSNLR	1	1	9	695	713	19	2096.07	0h
sp|O60841|IF2P_HUMAN	R.LKEGDTIIVPGVEGPIVTQIR.G	LKEGDTIIVPGVEGPIVTQIR	1	1	4	882	902	21	2233.27	0h
sp|O60869|EDF1_HUMAN	K.INEKPQVIADYESGR.A	INEKPQVIADYESGR	1	1	2	99	113	15	1717.86	0h
sp|O60884|DNJA2_HUMAN	K.EYHPDKNPNAGDKFK.E	EYHPDKNPNAGDKFK	1	0.9659	1	34	48	15	1758.83	0h
sp|O60888|CUTA_HUMAN	X.TQSSLVPALTDFVR.X	TQSSLVPALTDFVR	2	0.9991	3	125	138	14	1532.82	0h
sp|O60888|CUTA_HUMAN	R.LAACVNLIPQITSIYEWK.G	LAACVNLIPQITSIYEWK	3	1	1	93	110	18	2061.09	0h
sp|O60888|CUTA_HUMAN	R.SVHPYEVAEVIALPVEQGNFPYLQWVR.Q	SVHPYEVAEVIALPVEQGNFPYLQWVR	1	1	13	139	165	27	3139.61	0h
sp|O60925|PFD1_HUMAN	K.EAIHSQLLEK.Q	EAIHSQLLEK	2	1	4	74	83	10	1166.63	0h
sp|O60925|PFD1_HUMAN	K.LADIQIEQLNR.T	LADIQIEQLNR	2	1	7	29	39	11	1311.71	0h
sp|O75083|WDR1_HUMAN	X.LYSILGTTLKDEGK.X	LYSILGTTLKDEGK	3	0.9991	11	471	484	14	1536.84	0h
sp|O75083|WDR1_HUMAN	K.AHDGGIYAISWSPDSTHLLSASGDK.T	AHDGGIYAISWSPDSTHLLSASGDK	3	1	1	232	256	25	2584.22	0h
sp|O75153|K0664_HUMAN	X.FLSHSLVELLNQISPTFK.X	FLSHSLVELLNQISPTFK	2	1	3	277	294	18	2072.13	0h
sp|O75208|COQ9_HUMAN	X.MLIPYIEHWPR.X	MLIPYIEHWPR	2	0.9992	1	192	202	11	1453.75	0h
sp|O75223|GGCT_HUMAN	K.ENGLPLEYQEK.L	ENGLPLEYQEK	3	0.9943	2	149	159	11	1318.64	0h
sp|O75312|ZPR1_HUMAN	K.LVQIPHFK.E	LVQIPHFK	1	0.9972	1	272	279	8	980.579	0h
sp|O75312|ZPR1_HUMAN	X.GALTTVEGLITR.X	GALTTVEGLITR	1	0.9983	1	141	152	12	1229.7	0h
sp|O75333|TBX10_HUMAN	R.KDSERYAQENFK.S	KDSERYAQENFK	1	0.902	1	205	216	12	1513.71	0h
sp|O75340|PDCD6_HUMAN	K.QALSGFGYR.L	QALSGFGYR	1	0.9344	1	117	125	9	997.496	0h
sp|O75340|PDCD6_HUMAN	R.SIISMFDR.E	SIISMFDR	2	0.9834	4	67	74	8	967.478	0h
sp|O75340|PDCD6_HUMAN	R.DNSGMIDKNELK.Q	DNSGMIDKNELK	2	1	1	105	116	12	1362.64	0h
sp|O75347|TBCA_HUMAN	X.AEDGENYDIKK.X	AEDGENYDIKK	7	0.9726	1	42	52	11	1280.59	0h
sp|O75347|TBCA_HUMAN	K.MRAEDGENYDIKK.Q	MRAEDGENYDIKK	7	0.9796	5	40	52	13	1567.73	0h
sp|O75347|TBCA_HUMAN	R.RLEAAYLDLQR.I	RLEAAYLDLQR	5	1	1	70	80	11	1346.73	0h
sp|O75351|VPS4B_HUMAN	R.IYIPLPEPHAR.A	IYIPLPEPHAR	1	0.9888	1	296	306	11	1304.72	0h
sp|O75351|VPS4B_HUMAN	X.EAVILPIKFPHLFTGK.X	EAVILPIKFPHLFTGK	2	0.9969	1	148	163	16	1809.05	0h
sp|O75351|VPS4B_HUMAN	K.AGNYEEALQLYQHAVQYFLHVVK.Y	AGNYEEALQLYQHAVQYFLHVVK	1	0.9991	6	24	46	23	2719.37	0h
sp|O75351|VPS4B_HUMAN	K.FPHLFTGK.R	FPHLFTGK	2	0.9992	6	156	163	8	945.505	0h
sp|O75351|VPS4B_HUMAN	R.GILLFGPPGTGK.S	GILLFGPPGTGK	3	1	3	169	180	12	1155.66	0h
sp|O75351|VPS4B_HUMAN	K.LLEPVVSMSDMLR.S	LLEPVVSMSDMLR	1	1	14	404	416	13	1488.77	0h
sp|O75367|H2AY_HUMAN	R.HILLAVANDEELNQLLK.G	HILLAVANDEELNQLLK	3	0.9753	1	80	96	17	1932.07	0h
sp|O75367|H2AY_HUMAN	K.GVTIASGGVLPNIHPELLAK.K	GVTIASGGVLPNIHPELLAK	2	1	5	97	116	20	1985.13	0h
sp|O75368|SH3L1_HUMAN	K.DIAANEENRK.W	DIAANEENRK	1	0.9998	12	38	47	10	1158.56	0h
sp|O75368|SH3L1_HUMAN	R.ENNAVYAFLGLTAPPGSK.E	ENNAVYAFLGLTAPPGSK	1	1	11	87	104	18	1847.94	0h
sp|O75368|SH3L1_HUMAN	R.VYIASSSGSTAIK.K	VYIASSSGSTAIK	1	1	3	5	17	13	1282.67	0h
sp|O75369|FLNB_HUMAN	X.IQQNTFTR.X	IQQNTFTR	8	0.9798	1	17	24	8	1006.52	0h
sp|O75369|FLNB_HUMAN	X.LIALLEVLSQK.X	LIALLEVLSQK	8	1	13	50	60	11	1225.76	0h
sp|O75369|FLNB_HUMAN	X.QMQLENVSVALEFLDR.X	QMQLENVSVALEFLDR	7	1	12	74	89	16	1890.95	0h
sp|O75390|CISY_HUMAN	R.EGSGIGAIDSNLDWSHNFTNMLGYTDHQFTELTR.L	EGSGIGAIDSNLDWSHNFTNMLGYTDHQFTELTR	1	0.9039	1	223	256	34	3825.73	0h
sp|O75390|CISY_HUMAN	K.SMSTEGLMK.F	SMSTEGLMK	1	0.9962	4	451	459	9	982.444	0h
sp|O75390|CISY_HUMAN	K.DILADLIPK.E	DILADLIPK	1	0.9966	11	35	43	9	996.584	0h
sp|O75390|CISY_HUMAN	X.VVPGYGHAVLR.X	VVPGYGHAVLR	1	0.9973	13	341	351	11	1166.65	0h
sp|O75390|CISY_HUMAN	R.AALPSHVVTMLDNFPTNLHPMSQLSAAVTALNSESNFAR.A	AALPSHVVTMLDNFPTNLHPMSQLSAAVTALNSESNFAR	1	1	15	145	183	39	4151.06	0h
sp|O75390|CISY_HUMAN	R.ALGVLAQLIWSR.A	ALGVLAQLIWSR	1	1	3	429	440	12	1325.78	0h
sp|O75390|CISY_HUMAN	K.GLVYETSVLDPDEGIR.F	GLVYETSVLDPDEGIR	1	1	9	77	92	16	1761.88	0h
sp|O75390|CISY_HUMAN	K.HLPNDPMFK.L	HLPNDPMFK	1	1	10	367	375	9	1097.53	0h
sp|O75390|CISY_HUMAN	K.IVPNVLLEQGK.A	IVPNVLLEQGK	1	1	13	383	393	11	1208.71	0h
sp|O75396|SC22B_HUMAN	X.VLLTMIAR.X	VLLTMIAR	1	0.9038	1	2	9	8	915.556	0h
sp|O75396|SC22B_HUMAN	R.DLQQYQSQAK.Q	DLQQYQSQAK	1	0.9993	10	29	38	10	1207.58	0h
sp|O75396|SC22B_HUMAN	R.IMVANIEEVLQR.G	IMVANIEEVLQR	1	1	3	148	159	12	1413.76	0h
sp|O75400|PR40A_HUMAN	R.ALEKEEEEEKQK.S	ALEKEEEEEKQK	3	0.9982	5	587	598	12	1488.73	0h
sp|O75400|PR40A_HUMAN	X.FTNMLGQPGSTALDLFK.X	FTNMLGQPGSTALDLFK	2	0.9992	1	646	662	17	1838.92	0h
sp|O75436|VP26A_HUMAN	K.SNTHEFVNLVK.E	SNTHEFVNLVK	2	0.9952	1	83	93	11	1286.66	0h
sp|O75436|VP26A_HUMAN	K.YEIMDGAPVKGESIPIR.L	YEIMDGAPVKGESIPIR	1	1	6	233	249	17	1873.96	0h
sp|O75438|NDUB1_HUMAN	X.VNLLQIVR.X	VNLLQIVR	1	0.932	1	2	9	8	953.601	0h
sp|O75438|NDUB1_HUMAN	X.MVNLLQIVR.X	MVNLLQIVR	1	0.9983	2	1	9	9	1084.64	0h
sp|O75475|PSIP1_HUMAN	R.DFKPGDLIFAK.M	DFKPGDLIFAK	1	0.9999	5	4	14	11	1249.67	0h
sp|O75475|PSIP1_HUMAN	X.LPIFFFGTHETAFLGPK.X	LPIFFFGTHETAFLGPK	1	1	10	40	56	17	1921.01	0h
sp|O75489|NDUS3_HUMAN	K.QLSAFGEYVAEILPK.Y	QLSAFGEYVAEILPK	4	0.9985	2	57	71	15	1663.88	0h
sp|O75489|NDUS3_HUMAN	K.FDLNSPWEAFPVYR.Q	FDLNSPWEAFPVYR	1	0.9989	2	233	246	14	1739.83	0h
sp|O75489|NDUS3_HUMAN	X.EIWDMFGVFFANHPDLR.X	EIWDMFGVFFANHPDLR	1	0.9991	3	169	185	17	2092.98	0h
sp|O75489|NDUS3_HUMAN	X.KFDLNSPWEAFPVYR.X	KFDLNSPWEAFPVYR	1	1	4	232	246	15	1867.92	0h
sp|O75489|NDUS3_HUMAN	K.TYTDELTPIESAVSVFK.A	TYTDELTPIESAVSVFK	1	1	1	145	161	17	1898.95	0h
sp|O75489|NDUS3_HUMAN	R.VVAEPVELAQEFR.K	VVAEPVELAQEFR	1	1	2	219	231	13	1485.78	0h
sp|O75494|SRS10_HUMAN	R.GFAYVQFEDVR.D	GFAYVQFEDVR	4	1	4	52	62	11	1329.63	0h
sp|O75494|SRS10_HUMAN	R.YGPIVDVYVPLDFYTR.R	YGPIVDVYVPLDFYTR	3	1	15	33	48	16	1915.97	0h
sp|O75506|HSBP1_HUMAN	K.TVQDLTSVVQTLLQQMQDK.F	TVQDLTSVVQTLLQQMQDK	1	1	2	8	26	19	2174.12	0h
sp|O75526|HNRGT_HUMAN	R.GFAFVTFESPADAK.A	GFAFVTFESPADAK	5	1	11	50	63	14	1485.71	0h
sp|O75531|BAF_HUMAN	X.AYVVLGQFLVLK.X	AYVVLGQFLVLK	1	1	20	42	53	12	1348.81	0h
sp|O75531|BAF_HUMAN	R.DFVAEPMGEKPVGSLAGIGEVLGK.K	DFVAEPMGEKPVGSLAGIGEVLGK	1	1	19	9	32	24	2399.24	0h
sp|O75533|SF3B1_HUMAN	R.IVDDLKDEAEQYRK.M	IVDDLKDEAEQYRK	1	0.986	2	853	866	14	1720.86	0h
sp|O75533|SF3B1_HUMAN	K.GSETPGATPGSK.I	GSETPGATPGSK	1	0.9879	2	241	252	12	1087.51	0h
sp|O75533|SF3B1_HUMAN	R.GGDSIGETPTPGASK.R	GGDSIGETPTPGASK	1	0.9948	1	319	333	15	1372.64	0h
sp|O75533|SF3B1_HUMAN	K.AAGLATMISTMRPDIDNMDEYVR.N	AAGLATMISTMRPDIDNMDEYVR	1	0.9963	3	603	625	23	2569.2	0h
sp|O75533|SF3B1_HUMAN	X.LLVDVDESTLSPEEQKER.X	LLVDVDESTLSPEEQKER	1	0.9991	2	478	495	18	2086.04	0h
sp|O75533|SF3B1_HUMAN	R.AFAVVASALGIPSLLPFLK.A	AFAVVASALGIPSLLPFLK	1	1	22	631	649	19	1913.13	0h
sp|O75533|SF3B1_HUMAN	K.AIGPHDVLATLLNNLK.V	AIGPHDVLATLLNNLK	1	1	15	1087	1102	16	1687.96	0h
sp|O75533|SF3B1_HUMAN	R.DTPGHGSGWAETPR.T	DTPGHGSGWAETPR	1	1	2	302	315	14	1466.65	0h
sp|O75533|SF3B1_HUMAN	K.DYIYAVTPLLEDALMDR.D	DYIYAVTPLLEDALMDR	1	1	1	1164	1180	17	1996.98	0h
sp|O75533|SF3B1_HUMAN	R.EFGAGPLFNQILPLLMSPTLEDQER.H	EFGAGPLFNQILPLLMSPTLEDQER	1	1	1	525	549	25	2814.43	0h
sp|O75533|SF3B1_HUMAN	R.GDTPGHATPGHGGATSSAR.K	GDTPGHATPGHGGATSSAR	1	1	10	271	289	19	1732.79	0h
sp|O75533|SF3B1_HUMAN	R.ICFELLELLK.A	ICFELLELLK	1	1	13	1058	1067	10	1219.69	0h
sp|O75533|SF3B1_HUMAN	K.ILVVIEPLLIDEDYYAR.V	ILVVIEPLLIDEDYYAR	1	1	10	574	590	17	2033.11	0h
sp|O75533|SF3B1_HUMAN	K.IVQQIAILMGCAILPHLR.S	IVQQIAILMGCAILPHLR	1	1	6	667	684	18	1988.14	0h
sp|O75533|SF3B1_HUMAN	X.NRPLSDEELDAMFPEGYK.X	NRPLSDEELDAMFPEGYK	1	1	4	396	413	18	2109.97	0h
sp|O75533|SF3B1_HUMAN	R.SLVEIIEHGLVDEQQK.V	SLVEIIEHGLVDEQQK	1	1	10	685	700	16	1835.96	0h
sp|O75533|SF3B1_HUMAN	X.SRWDETPASQMGGSTPVLTPGK.X	SRWDETPASQMGGSTPVLTPGK	1	1	1	336	357	22	2301.1	0h
sp|O75533|SF3B1_HUMAN	K.TEILPPFFK.H	TEILPPFFK	1	1	9	808	816	9	1090.61	0h
sp|O75533|SF3B1_HUMAN	K.THEDIEAQIR.E	THEDIEAQIR	3	1	9	7	16	10	1210.6	0h
sp|O75533|SF3B1_HUMAN	R.TISALAIAALAEAATPYGIESFDSVLKPLWK.G	TISALAIAALAEAATPYGIESFDSVLKPLWK	1	1	4	703	733	31	3245.76	0h
sp|O75533|SF3B1_HUMAN	K.TPIGTPAMNMATPTPGHIMSMTPEQLQAWR.W	TPIGTPAMNMATPTPGHIMSMTPEQLQAWR	1	1	3	358	387	30	3264.55	0h
sp|O75533|SF3B1_HUMAN	R.WDQTADQTPGATPK.K	WDQTADQTPGATPK	1	1	9	200	213	14	1514.7	0h
sp|O75534|CSDE1_HUMAN	R.IKVDFVIPK.E	IKVDFVIPK	3	0.9403	1	287	295	9	1057.65	0h
sp|O75534|CSDE1_HUMAN	K.GTVSFHSHSDHR.F	GTVSFHSHSDHR	3	0.9866	4	416	427	12	1365.62	0h
sp|O75607|NPM3_HUMAN	R.NHDHQEIAVPVANLK.L	NHDHQEIAVPVANLK	1	1	9	88	102	15	1683.87	0h
sp|O75608|LYPA1_HUMAN	R.ASFPQGPIGGANR.D	ASFPQGPIGGANR	4	0.9686	1	150	162	13	1270.64	0h
sp|O75608|LYPA1_HUMAN	K.TLVNPANVTFK.T	TLVNPANVTFK	5	0.9882	3	191	201	11	1202.66	0h
sp|O75629|CREG1_HUMAN	X.FVTHVSDWGALATISTLEAVR.X	FVTHVSDWGALATISTLEAVR	1	0.904	1	61	81	21	2272.18	0h
sp|O75643|U520_HUMAN	R.EGSASTEVLR.T	EGSASTEVLR	1	0.904	1	754	763	10	1047.52	0h
sp|O75643|U520_HUMAN	X.LYDLNHNEIGELIR.X	LYDLNHNEIGELIR	1	0.9872	3	1153	1166	14	1697.87	0h
sp|O75643|U520_HUMAN	X.LELSVHLQPITR.X	LELSVHLQPITR	1	0.9962	5	1184	1195	12	1404.81	0h
sp|O75643|U520_HUMAN	R.DIDAFWLQR.Q	DIDAFWLQR	2	0.9992	2	262	270	9	1162.58	0h
sp|O75643|U520_HUMAN	K.DTLGLFLR.E	DTLGLFLR	1	0.9992	9	746	753	8	933.527	0h
sp|O75643|U520_HUMAN	X.GYTLLSEGIDEMVGIIYKPK.X	GYTLLSEGIDEMVGIIYKPK	2	0.9993	1	86	105	20	2225.16	0h
sp|O75643|U520_HUMAN	R.ETYEVLLSFIQAALGDQPR.D	ETYEVLLSFIQAALGDQPR	2	1	19	111	129	19	2149.11	0h
sp|O75643|U520_HUMAN	R.FYDDAIVSQK.K	FYDDAIVSQK	2	1	4	275	284	10	1184.57	0h
sp|O75643|U520_HUMAN	X.GLFYFDNSFRPVPLEQTYVGITEK.X	GLFYFDNSFRPVPLEQTYVGITEK	1	1	1	672	695	24	2819.41	0h
sp|O75643|U520_HUMAN	K.GVESVFDIMEMEDEER.N	GVESVFDIMEMEDEER	2	1	1	1978	1993	16	1913.8	0h
sp|O75643|U520_HUMAN	X.HLSDHLSELVEQTLSDLEQSK.X	HLSDHLSELVEQTLSDLEQSK	2	1	15	1780	1800	21	2407.19	0h
sp|O75643|U520_HUMAN	K.KADEVLEILK.T	KADEVLEILK	2	1	2	285	294	10	1156.67	0h
sp|O75643|U520_HUMAN	R.LIGLSATLPNYEDVATFLR.V	LIGLSATLPNYEDVATFLR	1	1	1	648	666	19	2092.12	0h
sp|O75643|U520_HUMAN	R.NALLQLTDSQIADVAR.F	NALLQLTDSQIADVAR	2	1	5	1994	2009	16	1726.92	0h
sp|O75643|U520_HUMAN	X.QVLDLEDLVFTQGSHFMANK.X	QVLDLEDLVFTQGSHFMANK	2	1	5	407	426	20	2291.12	0h
sp|O75643|U520_HUMAN	X.RLDLVHTAALMLDK.X	RLDLVHTAALMLDK	1	1	7	953	966	14	1594.88	0h
sp|O75663|TIPRL_HUMAN	K.ISSLMHVPPSLFTEPNEISQYLPIK.E	ISSLMHVPPSLFTEPNEISQYLPIK	1	1	1	221	245	25	2839.48	0h
sp|O75694|NU155_HUMAN	X.PSSLLGAAMPASTSAAALQEALENAGR.X	PSSLLGAAMPASTSAAALQEALENAGR	3	0.9715	1	2	28	27	2583.3	0h
sp|O75694|NU155_HUMAN	R.LLEVYDQLFK.S	LLEVYDQLFK	2	0.9999	2	1299	1308	10	1266.68	0h
sp|O75787|RENR_HUMAN	K.NPASPYNLAYK.Y	NPASPYNLAYK	1	0.9896	1	288	298	11	1236.61	0h
sp|O75792|RNH2A_HUMAN	X.LADLEALK.X	LADLEALK	1	0.9816	3	57	64	8	871.5	0h
sp|O75792|RNH2A_HUMAN	R.LQQSFPGIEVTVK.A	LQQSFPGIEVTVK	1	0.9982	2	153	165	13	1444.79	0h
sp|O75792|RNH2A_HUMAN	K.LQDLDTDYGSGYPNDPK.T	LQDLDTDYGSGYPNDPK	1	1	3	199	215	17	1896.84	0h
sp|O75822|EIF3J_HUMAN	K.VLTPEEQLADK.L	VLTPEEQLADK	2	0.9992	8	107	117	11	1241.65	0h
sp|O75822|EIF3J_HUMAN	K.VLTPEEQLADKLR.L	VLTPEEQLADKLR	2	1	1	107	119	13	1510.84	0h
sp|O75828|CBR3_HUMAN	X.FHQLDIDDLQSIR.X	FHQLDIDDLQSIR	5	0.9993	3	59	71	13	1598.81	0h
sp|O75832|PSD10_HUMAN	K.GGLGLILK.R	GGLGLILK	3	0.9965	4	214	221	8	769.503	0h
sp|O75844|FACE1_HUMAN	K.NEEVLAVLGHELGHWK.L	NEEVLAVLGHELGHWK	1	0.9874	6	326	341	16	1829.94	0h
sp|O75874|IDHC_HUMAN	X.LIFPYVELDLHSYDLGIENR.X	LIFPYVELDLHSYDLGIENR	6	0.9966	3	30	49	20	2405.22	0h
sp|O75874|IDHC_HUMAN	K.GQETSTNPIASIFAWTR.G	GQETSTNPIASIFAWTR	3	1	13	322	338	17	1877.93	0h
sp|O75874|IDHC_HUMAN	X.LVSGWVKPIIIGR.X	LVSGWVKPIIIGR	4	1	9	120	132	13	1436.88	0h
sp|O75914|PAK3_HUMAN	X.LLQTSNITK.X	LLQTSNITK	10	0.9833	3	116	124	9	1016.59	0h
sp|O75914|PAK3_HUMAN	X.STMVGTPYWMAPEVVTR.X	STMVGTPYWMAPEVVTR	9	1	15	435	451	17	1923.92	0h
sp|O75915|PRAF3_HUMAN	R.TPMGIVLDALEQQEEGINR.L	TPMGIVLDALEQQEEGINR	2	1	4	160	178	19	2112.05	0h
sp|O75937|DNJC8_HUMAN	R.QREEEIEAQEK.A	QREEEIEAQEK	1	0.9991	13	191	201	11	1387.66	0h
sp|O75937|DNJC8_HUMAN	K.EGKPTIVEEDDPELFK.Q	EGKPTIVEEDDPELFK	1	1	2	144	159	16	1844.9	0h
sp|O75937|DNJC8_HUMAN	R.LTRPGSSYFNLNPFEVLQIDPEVTDEEIK.K	LTRPGSSYFNLNPFEVLQIDPEVTDEEIK	1	1	1	46	74	29	3349.67	0h
sp|O75940|SPF30_HUMAN	X.DLQEVIELTK.X	DLQEVIELTK	1	0.9983	3	38	47	10	1186.64	0h
sp|O75947|ATP5H_HUMAN	X.SWNETLTSR.X	SWNETLTSR	1	0.9871	2	33	41	9	1092.52	0h
sp|O75947|ATP5H_HUMAN	X.AGLVDDFEKK.X	AGLVDDFEKK	1	0.9991	1	64	73	10	1120.57	0h
sp|O75947|ATP5H_HUMAN	R.LAALPENPPAIDWAYYK.A	LAALPENPPAIDWAYYK	1	1	15	42	58	17	1930.98	0h
sp|O75947|ATP5H_HUMAN	K.NLIPFDQMTIEDLNEAFPETK.L	NLIPFDQMTIEDLNEAFPETK	1	1	16	124	144	21	2464.18	0h
sp|O75947|ATP5H_HUMAN	X.TIDWVAFAEIIPQNQK.X	TIDWVAFAEIIPQNQK	1	1	11	10	25	16	1871.98	0h
sp|O75976|CBPD_HUMAN	R.ELLLNLIEYLCK.N	ELLLNLIEYLCK	1	1	3	572	583	12	1462.81	0h
sp|O76003|GLRX3_HUMAN	K.ELPQVSFVK.L	ELPQVSFVK	1	0.9014	1	59	67	9	1045.58	0h
sp|O76003|GLRX3_HUMAN	K.AYSNWPTYPQLYVK.G	AYSNWPTYPQLYVK	1	1	6	295	308	14	1728.85	0h
sp|O76003|GLRX3_HUMAN	X.LEAEGVPEVSEKYEISSVPTFLFFK.X	LEAEGVPEVSEKYEISSVPTFLFFK	1	1	2	68	92	25	2844.44	0h
sp|O76021|RL1D1_HUMAN	R.LTLPHSIR.S	LTLPHSIR	2	0.9991	9	82	89	8	935.555	0h
sp|O76021|RL1D1_HUMAN	R.IGHVGMQIEHIIENIVAVTK.G	IGHVGMQIEHIIENIVAVTK	2	1	9	216	235	20	2200.2	0h
sp|O76094|SRP72_HUMAN	K.SPAHLSLIR.E	SPAHLSLIR	2	0.9346	1	443	451	9	992.576	0h
sp|O76094|SRP72_HUMAN	K.DIHTLAQLISAYSLVDPEK.A	DIHTLAQLISAYSLVDPEK	2	1	11	480	498	19	2112.11	0h
sp|O76094|SRP72_HUMAN	K.GTQGATAGASSELDASK.T	GTQGATAGASSELDASK	1	1	2	601	617	17	1549.72	0h
sp|O76094|SRP72_HUMAN	K.LKPTDVGLLAVIANNIITINK.D	LKPTDVGLLAVIANNIITINK	2	1	12	255	275	21	2219.32	0h
sp|O76094|SRP72_HUMAN	K.VDVEALENSAGATYIR.K	VDVEALENSAGATYIR	2	1	1	516	531	16	1706.85	0h
sp|O76096|CYTF_HUMAN	K.TNDPGVLQAAR.Y	TNDPGVLQAAR	1	0.9864	2	44	54	11	1140.59	0h
sp|O94776|MTA2_HUMAN	K.VWDPDNPLTDR.Q	VWDPDNPLTDR	2	0.9921	1	178	188	11	1326.62	0h
sp|O94776|MTA2_HUMAN	X.EFEEESKQPGVSEQQR.X	EFEEESKQPGVSEQQR	1	1	2	65	80	16	1905.87	0h
sp|O94776|MTA2_HUMAN	K.LNPADAPNPVVFVATK.D	LNPADAPNPVVFVATK	2	1	2	596	611	16	1651.89	0h
sp|O94804|STK10_HUMAN	K.AGNVLMTLEGDIR.L	AGNVLMTLEGDIR	1	1	2	160	172	13	1387.71	0h
sp|O94804|STK10_HUMAN	R.DLDPNEVWEIVGELGDGAFGK.V	DLDPNEVWEIVGELGDGAFGK	1	1	15	29	49	21	2259.07	0h
sp|O94808|GFPT2_HUMAN	X.QVLEELTELPVMVELASDFLDR.X	QVLEELTELPVMVELASDFLDR	2	1	1	387	408	22	2545.3	0h
sp|O94826|TOM70_HUMAN	K.SDEDKDKEGEALEVK.E	SDEDKDKEGEALEVK	1	0.9396	1	279	293	15	1690.79	0h
sp|O94826|TOM70_HUMAN	K.ILLDQVEEAVADFDECIR.L	ILLDQVEEAVADFDECIR	1	1	13	412	429	18	2077	0h
sp|O94826|TOM70_HUMAN	K.SYFSSFTDDIISQPMLK.G	SYFSSFTDDIISQPMLK	1	1	14	259	275	17	1977.94	0h
sp|O94874|UFL1_HUMAN	R.TIKDLQEEVSNLYNNIR.L	TIKDLQEEVSNLYNNIR	1	1	1	536	552	17	2048.05	0h
sp|O94903|PROSC_HUMAN	X.LMAVPNLFMLETVDSVK.X	LMAVPNLFMLETVDSVK	4	0.9862	1	105	121	17	1905.99	0h
sp|O94903|PROSC_HUMAN	K.LADKVNSSWQR.K	LADKVNSSWQR	4	0.9961	1	122	132	11	1302.67	0h
sp|O94903|PROSC_HUMAN	R.TFGENYVQELLEK.A	TFGENYVQELLEK	4	1	2	64	76	13	1568.77	0h
sp|O94925|GLSK_HUMAN	X.FDYVMQFLNK.X	FDYVMQFLNK	1	0.9977	4	355	364	10	1303.62	0h
sp|O94925|GLSK_HUMAN	X.GSTHPQPGVSPPAAPAAPGPK.X	GSTHPQPGVSPPAAPAAPGPK	1	1	1	86	106	21	1919.98	0h
sp|O94973|AP2A2_HUMAN	X.VGGYILGEFGNLIAGDPR.X	VGGYILGEFGNLIAGDPR	5	0.9992	1	498	515	18	1846.95	0h
sp|O94989|ARHGF_HUMAN	R.CSAEVGRMK.Q	CSAEVGRMK	2	0.9462	8	598	606	9	979.455	0h
sp|O95197|RTN3_HUMAN	X.TQIDHYVGIAR.X	TQIDHYVGIAR	1	1	4	999	1009	11	1271.66	0h
sp|O95202|LETM1_HUMAN	R.AMYLPDTLSPADQLK.S	AMYLPDTLSPADQLK	1	1	3	420	434	15	1661.83	0h
sp|O95202|LETM1_HUMAN	K.FLQDTIEEMALK.N	FLQDTIEEMALK	1	1	1	263	274	12	1436.72	0h
sp|O95202|LETM1_HUMAN	K.VAEVEGEQVDNK.A	VAEVEGEQVDNK	1	1	7	452	463	12	1315.62	0h
sp|O95202|LETM1_HUMAN	R.VQQMIGQIDGLISQLEMDQQAGK.L	VQQMIGQIDGLISQLEMDQQAGK	1	1	4	612	634	23	2529.26	0h
sp|O95232|LC7L3_HUMAN	X.LVEQLKEER.X	LVEQLKEER	1	0.9039	1	161	169	9	1142.63	0h
sp|O95232|LC7L3_HUMAN	R.YLQSLLAEVER.R	YLQSLLAEVER	3	0.979	2	88	98	11	1319.71	0h
sp|O95232|LC7L3_HUMAN	R.LALSQNQQSSGAAGPTGK.N	LALSQNQQSSGAAGPTGK	2	1	9	107	124	18	1713.86	0h
sp|O95232|LC7L3_HUMAN	R.STTSTIESFAAQEK.Q	STTSTIESFAAQEK	1	1	4	174	187	14	1498.71	0h
sp|O95249|GOSR1_HUMAN	X.MFETMAIEIEQLLAR.X	MFETMAIEIEQLLAR	3	0.9978	1	66	80	15	1793.9	0h
sp|O95319|CELF2_HUMAN	R.KLFIGMVSK.K	KLFIGMVSK	4	0.9623	1	133	141	9	1021.6	0h
sp|O95319|CELF2_HUMAN	K.ELFEPYGAVYQINVLR.D	ELFEPYGAVYQINVLR	4	1	2	58	73	16	1909.99	0h
sp|O95336|6PGL_HUMAN	R.VTLTLPVLNAAR.T	VTLTLPVLNAAR	1	0.999	3	186	197	12	1266.77	0h
sp|O95336|6PGL_HUMAN	X.LPIPESQVITINPELPVEEAAEDYAK.X	LPIPESQVITINPELPVEEAAEDYAK	1	0.9991	1	103	128	26	2864.47	0h
sp|O95372|LYPA2_HUMAN	X.ETAAVIFLHGLGDTGHSWADALSTIR.X	ETAAVIFLHGLGDTGHSWADALSTIR	6	1	3	23	48	26	2737.38	0h
sp|O95372|LYPA2_HUMAN	K.MVMPSWFDLMGLSPDAPEDEAGIKK.A	MVMPSWFDLMGLSPDAPEDEAGIKK	8	1	7	70	94	25	2763.29	0h
sp|O95373|IPO7_HUMAN	X.AIFQTIQNR.X	AIFQTIQNR	1	0.9204	1	964	972	9	1089.59	0h
sp|O95373|IPO7_HUMAN	K.WALHILAR.L	WALHILAR	1	0.9752	2	263	270	8	978.575	0h
sp|O95373|IPO7_HUMAN	R.ETENDDLTNVIQK.M	ETENDDLTNVIQK	1	0.9991	2	552	564	13	1517.72	0h
sp|O95373|IPO7_HUMAN	X.ENIVEAIIHSPELIR.X	ENIVEAIIHSPELIR	2	0.9992	2	93	107	15	1731.95	0h
sp|O95373|IPO7_HUMAN	K.AVTAMGILNTIDTLLSVVEDHK.E	AVTAMGILNTIDTLLSVVEDHK	1	1	15	605	626	22	2339.24	0h
sp|O95373|IPO7_HUMAN	K.DGALHMIGSLAEILLK.K	DGALHMIGSLAEILLK	1	1	30	430	445	16	1679.92	0h
sp|O95373|IPO7_HUMAN	R.SPLVAAMQHFLPVLK.D	SPLVAAMQHFLPVLK	2	1	23	168	182	15	1649.93	0h
sp|O95379|TFIP8_HUMAN	K.SIATTLIDDTSSEVLDELYR.V	SIATTLIDDTSSEVLDELYR	4	1	30	37	56	20	2240.11	0h
sp|O95433|AHSA1_HUMAN	K.LDGEASINNR.K	LDGEASINNR	1	0.9844	1	64	73	10	1087.53	0h
sp|O95433|AHSA1_HUMAN	R.ADATNVNNWHWTER.D	ADATNVNNWHWTER	1	1	1	17	30	14	1712.77	0h
sp|O95433|AHSA1_HUMAN	R.VFTTQELVQAFTHAPATLEADR.G	VFTTQELVQAFTHAPATLEADR	1	1	5	225	246	22	2444.23	0h
sp|O95453|PARN_HUMAN	R.VMDIPYLNLEGPDLQPK.R	VMDIPYLNLEGPDLQPK	3	0.999	2	427	443	17	1940.99	0h
sp|O95466|FMNL_HUMAN	X.LQSLDALLEMK.X	LQSLDALLEMK	1	0.99	1	861	871	11	1259.68	0h
sp|O95466|FMNL_HUMAN	K.AGSVSLDSVLADVR.S	AGSVSLDSVLADVR	1	0.9998	2	907	920	14	1387.73	0h
sp|O95466|FMNL_HUMAN	K.TTSPGLFFSLFSR.F	TTSPGLFFSLFSR	1	0.9999	3	980	992	13	1458.75	0h
sp|O95466|FMNL_HUMAN	K.NAVLEHMEELQEQVALLTER.L	NAVLEHMEELQEQVALLTER	1	1	1	395	414	20	2351.18	0h
sp|O95487|SC24B_HUMAN	K.LFPLYVLALLK.Q	LFPLYVLALLK	2	0.999	7	1073	1083	11	1288.81	0h
sp|O95573|ACSL3_HUMAN	X.TKADFFEDENGQR.X	TKADFFEDENGQR	1	0.9085	1	546	558	13	1555.69	0h
sp|O95573|ACSL3_HUMAN	R.LSPEPWTPETGLVTDAFK.L	LSPEPWTPETGLVTDAFK	3	0.9998	3	682	699	18	1986.99	0h
sp|O95602|RPA1_HUMAN	K.LLSPSILKPFPLWTGK.Q	LLSPSILKPFPLWTGK	2	1	2	670	685	16	1796.06	0h
sp|O95678|K2C75_HUMAN	R.TAAENEFVALKK.D	TAAENEFVALKK	1	1	3	247	258	12	1319.71	0h
sp|O95757|HS74L_HUMAN	R.YLEEERPFAIEQVTGMLLAK.L	YLEEERPFAIEQVTGMLLAK	3	1	2	105	124	20	2336.21	0h
sp|O95777|NAA38_HUMAN	X.GFDQTINLILDESHER.X	GFDQTINLILDESHER	5	1	3	29	44	16	1885.92	0h
sp|O95782|AP2A1_HUMAN	R.DFLTPPLLSVR.F	DFLTPPLLSVR	1	0.9934	1	833	843	11	1256.71	0h
sp|O95782|AP2A1_HUMAN	K.ANHPMDAEVTK.A	ANHPMDAEVTK	1	0.9992	1	895	905	11	1211.56	0h
sp|O95831|AIFM1_HUMAN	K.ELWFSDDPNVTK.T	ELWFSDDPNVTK	2	0.9995	2	178	189	12	1449.68	0h
sp|O95831|AIFM1_HUMAN	R.VLIVSEDPELPYMRPPLSK.E	VLIVSEDPELPYMRPPLSK	2	0.9997	1	159	177	19	2182.17	0h
sp|O95831|AIFM1_HUMAN	K.AALSASEGEEVPQDK.A	AALSASEGEEVPQDK	2	1	3	113	127	15	1529.72	0h
sp|O95983|MBD3_HUMAN	X.LEEALMADMLAHVEELAR.X	LEEALMADMLAHVEELAR	1	1	2	239	256	18	2040	0h
sp|O96000|NDUBA_HUMAN	X.DYKVDQEIINIMQDR.X	DYKVDQEIINIMQDR	2	1	4	89	103	15	1878.91	0h
sp|O96008|TOM40_HUMAN	K.KLPPLPLTLALGAFLNHR.K	KLPPLPLTLALGAFLNHR	1	1	12	331	348	18	1970.18	0h
sp|O96008|TOM40_HUMAN	K.LPPLPLTLALGAFLNHR.K	LPPLPLTLALGAFLNHR	1	1	12	332	348	17	1842.09	0h
sp|O96019|ACL6A_HUMAN	X.ELFQEMNIELVPPYMIASK.X	ELFQEMNIELVPPYMIASK	1	1	1	208	226	19	2251.12	0h
sp|O96019|ACL6A_HUMAN	X.SEASLHPVLMSEAPWNTR.X	SEASLHPVLMSEAPWNTR	1	1	3	113	130	18	2023.98	0h
sp|O96019|ACL6A_HUMAN	K.VDFPTAIGMVVER.D	VDFPTAIGMVVER	1	1	9	35	47	13	1432.74	0h
sp|P00338|LDHA_HUMAN	X.LVIITAGAR.X	LVIITAGAR	5	0.9737	1	91	99	9	912.574	0h
sp|P00338|LDHA_HUMAN	R.VHPVSTMIK.G	VHPVSTMIK	3	0.988	2	270	278	9	1010.56	0h
sp|P00338|LDHA_HUMAN	X.DQLIYNLLK.X	DQLIYNLLK	6	0.9982	11	6	14	9	1118.63	0h
sp|P00338|LDHA_HUMAN	K.FIIPNVVK.Y	FIIPNVVK	5	0.9987	8	119	126	8	928.572	0h
sp|P00338|LDHA_HUMAN	K.TLHPDLGTDK.D	TLHPDLGTDK	6	0.9989	1	213	222	10	1095.56	0h
sp|P00338|LDHA_HUMAN	K.QVVESAYEVIK.L	QVVESAYEVIK	3	0.999	6	233	243	11	1263.67	0h
sp|P00338|LDHA_HUMAN	R.RVHPVSTMIK.G	RVHPVSTMIK	3	0.9992	4	269	278	10	1166.66	0h
sp|P00338|LDHA_HUMAN	K.DLADELALVDVIEDKLK.G	DLADELALVDVIEDKLK	5	1	5	43	59	17	1898.02	0h
sp|P00338|LDHA_HUMAN	X.DQLIYNLLKEEQTPQNK.X	DQLIYNLLKEEQTPQNK	6	1	7	6	22	17	2073.07	0h
sp|P00338|LDHA_HUMAN	K.GEMMDLQHGSLFLR.T	GEMMDLQHGSLFLR	5	1	21	60	73	14	1632.77	0h
sp|P00338|LDHA_HUMAN	K.GYTSWAIGLSVADLAESIMK.N	GYTSWAIGLSVADLAESIMK	3	1	2	246	265	20	2111.06	0h
sp|P00338|LDHA_HUMAN	K.KSADTLWGIQK.E	KSADTLWGIQK	4	1	4	318	328	11	1245.67	0h
sp|P00338|LDHA_HUMAN	K.LKGEMMDLQHGSLFLR.T	LKGEMMDLQHGSLFLR	5	1	17	58	73	16	1873.95	0h
sp|P00338|LDHA_HUMAN	K.SADTLWGIQK.E	SADTLWGIQK	4	1	4	319	328	10	1117.58	0h
sp|P00338|LDHA_HUMAN	K.TLHPDLGTDKDKEQWK.E	TLHPDLGTDKDKEQWK	6	1	15	213	228	16	1909.95	0h
sp|P00338|LDHA_HUMAN	K.VTLTSEEEAR.L	VTLTSEEEAR	4	1	9	306	315	10	1133.56	0h
sp|P00367|DHE3_HUMAN	X.NYTDNELEK.X	NYTDNELEK	2	0.987	7	192	200	9	1124.5	0h
sp|P00367|DHE3_HUMAN	K.TFVVQGFGNVGLHSMR.Y	TFVVQGFGNVGLHSMR	3	0.9893	1	303	318	16	1747.88	0h
sp|P00367|DHE3_HUMAN	R.YSTDVSVDEVK.A	YSTDVSVDEVK	3	0.9941	2	152	162	11	1240.58	0h
sp|P00367|DHE3_HUMAN	K.DIVHSGLAYTMER.S	DIVHSGLAYTMER	2	0.9954	1	504	516	13	1490.72	0h
sp|P00367|DHE3_HUMAN	K.MVEGFFDR.G	MVEGFFDR	3	0.9966	1	69	76	8	999.446	0h
sp|P00367|DHE3_HUMAN	R.RFTMELAK.K	RFTMELAK	3	0.997	3	204	211	8	994.525	0h
sp|P00367|DHE3_HUMAN	X.IIAEGANGPTTPEADKIFLER.X	IIAEGANGPTTPEADKIFLER	3	0.9992	4	400	420	21	2241.16	0h
sp|P00367|DHE3_HUMAN	K.YNLGLDLR.T	YNLGLDLR	3	0.9998	7	528	535	8	962.517	0h
sp|P00367|DHE3_HUMAN	K.GFIGPGIDVPAPDMSTGER.E	GFIGPGIDVPAPDMSTGER	2	1	9	213	231	19	1914.91	0h
sp|P00367|DHE3_HUMAN	K.HGGTIPIVPTAEFQDR.I	HGGTIPIVPTAEFQDR	2	1	8	481	496	16	1736.88	0h
sp|P00387|NB5R3_HUMAN	R.IDGNLVVRPYTPISSDDDKGFVDLVIK.V	IDGNLVVRPYTPISSDDDKGFVDLVIK	2	0.937	1	85	111	27	2974.56	0h
sp|P00387|NB5R3_HUMAN	R.STPAITLESPDIK.Y	STPAITLESPDIK	2	0.9893	4	30	42	13	1370.73	0h
sp|P00387|NB5R3_HUMAN	X.DILLRPELEELR.X	DILLRPELEELR	1	0.9898	2	215	226	12	1494.84	0h
sp|P00387|NB5R3_HUMAN	R.GPSGLLVYQGK.G	GPSGLLVYQGK	2	1	7	144	154	11	1117.61	0h
sp|P00387|NB5R3_HUMAN	R.STPAITLESPDIKYPLR.L	STPAITLESPDIKYPLR	2	1	3	30	46	17	1900.03	0h
sp|P00387|NB5R3_HUMAN	K.SVGMIAGGTGITPMLQVIR.A	SVGMIAGGTGITPMLQVIR	1	1	13	174	192	19	1900.02	0h
sp|P00390|GSHR_HUMAN	K.ALLTPVAIAAGR.K	ALLTPVAIAAGR	1	0.9599	2	380	391	12	1151.7	0h
sp|P00403|COX2_HUMAN	K.IFEMGPVFTL.-	IFEMGPVFTL	2	0.9711	3	218	227	10	1152.59	0h
sp|P00403|COX2_HUMAN	R.ILYMTDEVNDPSLTIK.S	ILYMTDEVNDPSLTIK	2	1	13	83	98	16	1850.93	0h
sp|P00403|COX2_HUMAN	R.MMITSQDVLHSWAVPTLGLK.T	MMITSQDVLHSWAVPTLGLK	2	1	8	152	171	20	2226.15	0h
sp|P00441|SODC_HUMAN	K.GDGPVQGIINFEQK.E	GDGPVQGIINFEQK	1	0.9991	2	11	24	14	1500.76	0h
sp|P00441|SODC_HUMAN	K.ADDLGKGGNEESTK.T	ADDLGKGGNEESTK	2	1	8	124	137	14	1419.64	0h
sp|P00441|SODC_HUMAN	R.HVGDLGNVTADK.D	HVGDLGNVTADK	2	1	11	81	92	12	1224.61	0h
sp|P00491|PNPH_HUMAN	X.DHINLPGFSGQNPLRGPNDER.X	DHINLPGFSGQNPLRGPNDER	1	0.9334	1	134	154	21	2332.13	0h
sp|P00491|PNPH_HUMAN	K.QAAQKLEQFVSILMASIPLPDKAS.-	QAAQKLEQFVSILMASIPLPDKAS	1	0.9886	3	266	289	24	2584.39	0h
sp|P00491|PNPH_HUMAN	X.NTAEWLLSHTK.X	NTAEWLLSHTK	1	0.9992	5	12	22	11	1298.66	0h
sp|P00491|PNPH_HUMAN	K.ANHEEVLAAGK.Q	ANHEEVLAAGK	1	1	6	255	265	11	1137.58	0h
sp|P00491|PNPH_HUMAN	R.DHINLPGFSGQNPLR.G	DHINLPGFSGQNPLR	1	1	16	134	148	15	1663.84	0h
sp|P00491|PNPH_HUMAN	K.FEVGDIMLIR.D	FEVGDIMLIR	1	1	15	124	133	10	1191.63	0h
sp|P00491|PNPH_HUMAN	R.FGDRFPAMSDAYDR.T	FGDRFPAMSDAYDR	1	1	5	155	168	14	1646.71	0h
sp|P00491|PNPH_HUMAN	X.FPAMSDAYDR.X	FPAMSDAYDR	1	1	5	159	168	10	1171.49	0h
sp|P00491|PNPH_HUMAN	K.LEQFVSILMASIPLPDK.A	LEQFVSILMASIPLPDK	1	1	29	271	287	17	1900.04	0h
sp|P00491|PNPH_HUMAN	K.LEQFVSILMASIPLPDKAS.-	LEQFVSILMASIPLPDKAS	1	1	13	271	289	19	2058.11	0h
sp|P00491|PNPH_HUMAN	X.LGADAVGMSTVPEVIVAR.X	LGADAVGMSTVPEVIVAR	1	1	2	212	229	18	1783.95	0h
sp|P00491|PNPH_HUMAN	X.QAAQKLEQFVSILMASIPLPDK.X	QAAQKLEQFVSILMASIPLPDK	1	1	5	266	287	22	2426.32	0h
sp|P00491|PNPH_HUMAN	X.VFHLLGVDTLVVTNAAGGLNPK.X	VFHLLGVDTLVVTNAAGGLNPK	1	1	1	102	123	22	2234.24	0h
sp|P00492|HPRT_HUMAN	R.VFIPHGLIMDR.T	VFIPHGLIMDR	2	0.9985	4	35	45	11	1296.7	0h
sp|P00492|HPRT_HUMAN	K.VIGGDDLSTLTGK.N	VIGGDDLSTLTGK	2	0.999	1	116	128	13	1274.67	0h
sp|P00492|HPRT_HUMAN	R.SVGYKPDFVGFEIPDK.F	SVGYKPDFVGFEIPDK	2	0.9997	1	171	186	16	1796.89	0h
sp|P00492|HPRT_HUMAN	K.FFADLLDYIK.A	FFADLLDYIK	2	1	11	74	83	10	1243.65	0h
sp|P00492|HPRT_HUMAN	K.NVLIVEDIIDTGK.T	NVLIVEDIIDTGK	1	1	6	129	141	13	1427.79	0h
sp|P00492|HPRT_HUMAN	R.SIPMTVDFIR.L	SIPMTVDFIR	2	1	9	92	101	10	1177.62	0h
sp|P00492|HPRT_HUMAN	K.TMQTLLSLVR.Q	TMQTLLSLVR	2	1	8	142	151	10	1160.66	0h
sp|P00505|AATM_HUMAN	X.PTWGNHTPIFR.X	PTWGNHTPIFR	2	0.9756	7	160	170	11	1324.67	0h
sp|P00505|AATM_HUMAN	R.DAGMQLQGYR.Y	DAGMQLQGYR	2	1	2	171	180	10	1137.52	0h
sp|P00505|AATM_HUMAN	R.IAAAILNTPDLR.K	IAAAILNTPDLR	2	1	9	326	337	12	1266.73	0h
sp|P00540|MOS_HUMAN	K.LLLGATLPR.A	LLLGATLPR	1	0.9871	10	34	42	9	952.606	0h
sp|P00558|PGK1_HUMAN	K.AEPAKIEAFR.A	AEPAKIEAFR	3	0.9759	2	142	151	10	1130.61	0h
sp|P00558|PGK1_HUMAN	X.TGQATVASGIPAGWMGLDCGPESSKK.X	TGQATVASGIPAGWMGLDCGPESSKK	4	0.9886	1	298	323	26	2547.2	0h
sp|P00558|PGK1_HUMAN	K.KELNYFAK.A	KELNYFAK	4	0.9974	3	192	199	8	1011.54	0h
sp|P00558|PGK1_HUMAN	R.FHVEEEGK.G	FHVEEEGK	4	0.9975	5	124	131	8	973.449	0h
sp|P00558|PGK1_HUMAN	X.NNQITNNQR.X	NNQITNNQR	3	0.9991	12	31	39	9	1100.53	0h
sp|P00558|PGK1_HUMAN	K.IQLINNMLDK.V	IQLINNMLDK	5	0.9992	4	221	230	10	1200.65	0h
sp|P00558|PGK1_HUMAN	K.ALMDEVVK.A	ALMDEVVK	5	0.9998	11	354	361	8	903.471	0h
sp|P00558|PGK1_HUMAN	K.ACANPAAGSVILLENLR.F	ACANPAAGSVILLENLR	2	1	3	107	123	17	1710.91	0h
sp|P00558|PGK1_HUMAN	R.AHSSMVGVNLPQK.A	AHSSMVGVNLPQK	3	1	10	172	184	13	1366.7	0h
sp|P00558|PGK1_HUMAN	K.ALESPERPFLAILGGAK.V	ALESPERPFLAILGGAK	4	1	29	200	216	17	1767.99	0h
sp|P00558|PGK1_HUMAN	R.FHVEEEGKGK.D	FHVEEEGKGK	3	1	10	124	133	10	1158.56	0h
sp|P00558|PGK1_HUMAN	K.IQLINNMLDKVNEMIIGGGMAFTFLK.V	IQLINNMLDKVNEMIIGGGMAFTFLK	5	1	15	221	246	26	2909.52	0h
sp|P00558|PGK1_HUMAN	K.ITLPVDFVTADKFDENAK.T	ITLPVDFVTADKFDENAK	4	1	27	280	297	18	2022.03	0h
sp|P00558|PGK1_HUMAN	K.LGDVYVNDAFGTAHR.A	LGDVYVNDAFGTAHR	4	1	21	157	171	15	1633.78	0h
sp|P00558|PGK1_HUMAN	K.LTLDKLDVK.G	LTLDKLDVK	4	1	6	7	15	9	1043.62	0h
sp|P00558|PGK1_HUMAN	K.QIVWNGPVGVFEWEAFAR.G	QIVWNGPVGVFEWEAFAR	4	1	43	333	350	18	2104.05	0h
sp|P00558|PGK1_HUMAN	K.SVVLMSHLGRPDGVPMPDK.Y	SVVLMSHLGRPDGVPMPDK	2	1	10	57	75	19	2034.04	0h
sp|P00558|PGK1_HUMAN	K.SVVLMSHLGRPDGVPMPDKYSLEPVAVELK.S	SVVLMSHLGRPDGVPMPDKYSLEPVAVELK	2	1	21	57	86	30	3262.7	0h
sp|P00558|PGK1_HUMAN	X.VADKIQLINNMLDK.X	VADKIQLINNMLDK	5	1	7	217	230	14	1613.88	0h
sp|P00558|PGK1_HUMAN	R.VDFNVPMK.N	VDFNVPMK	5	1	10	23	30	8	948.471	0h
sp|P00558|PGK1_HUMAN	K.VLNNMEIGTSLFDEEGAK.I	VLNNMEIGTSLFDEEGAK	5	1	15	247	264	18	1965.93	0h
sp|P00558|PGK1_HUMAN	K.VSHVSTGGGASLELLEGK.V	VSHVSTGGGASLELLEGK	6	1	12	389	406	18	1739.9	0h
sp|P00558|PGK1_HUMAN	K.WNTEDKVSHVSTGGGASLELLEGK.V	WNTEDKVSHVSTGGGASLELLEGK	6	1	14	383	406	24	2513.24	0h
sp|P00558|PGK1_HUMAN	K.YSLEPVAVELK.S	YSLEPVAVELK	2	1	2	76	86	11	1246.68	0h
sp|P00813|ADA_HUMAN	R.ELLDLLYK.A	ELLDLLYK	1	0.99	1	342	349	8	1005.57	0h
sp|P00813|ADA_HUMAN	X.GIALPANTAEGLLNVIGMDKPLTLPDFLAK.X	GIALPANTAEGLLNVIGMDKPLTLPDFLAK	1	1	13	35	64	30	3091.7	0h
sp|P00846|ATP6_HUMAN	X.LITTQQWLIK.X	LITTQQWLIK	2	0.9985	5	42	51	10	1242.73	0h
sp|P00918|CAH2_HUMAN	K.SADFTNFDPR.G	SADFTNFDPR	1	0.9465	1	172	181	10	1168.51	0h
sp|P00918|CAH2_HUMAN	K.EPISVSSEQVLK.F	EPISVSSEQVLK	1	0.9992	1	213	224	12	1314.7	0h
sp|P00918|CAH2_HUMAN	K.AVQQPDGLAVLGIFLK.V	AVQQPDGLAVLGIFLK	1	1	5	133	148	16	1667.96	0h
sp|P00918|CAH2_HUMAN	K.VVDVLDSIK.T	VVDVLDSIK	1	1	2	159	167	9	986.562	0h
sp|P01889|1B07_HUMAN	X.DGEDQTQDTELVETRPAGDR.X	DGEDQTQDTELVETRPAGDR	30	1	26	244	263	20	2230.99	0h
sp|P01889|1B07_HUMAN	X.THVTHHPISDHEATLR.X	THVTHHPISDHEATLR	29	1	21	211	226	16	1849.92	0h
sp|P01891|1A68_HUMAN	X.DGEDQTQDTELVETRPAGDGTFQK.X	DGEDQTQDTELVETRPAGDGTFQK	30	1	2	244	267	24	2636.18	0h
sp|P01893|HLAH_HUMAN	X.THMTHHPISDHEATLR.X	THMTHHPISDHEATLR	15	1	2	211	226	16	1881.89	0h
sp|P02545|LMNA_HUMAN	X.MQQQLDEYQELLDIK.X	MQQQLDEYQELLDIK	7	0.9993	1	352	366	15	1892.92	0h
sp|P02786|TFR1_HUMAN	K.LTVSNVLK.E	LTVSNVLK	1	0.9764	1	375	382	8	872.531	0h
sp|P02786|TFR1_HUMAN	X.GFVEPDHYVVVGAQR.X	GFVEPDHYVVVGAQR	1	0.994	2	395	409	15	1671.83	0h
sp|P02786|TFR1_HUMAN	K.SGVGTALLLK.L	SGVGTALLLK	1	0.9966	4	419	428	10	957.583	0h
sp|P02786|TFR1_HUMAN	X.DENLALYVENQFR.X	DENLALYVENQFR	1	0.9967	1	162	174	13	1609.77	0h
sp|P02786|TFR1_HUMAN	K.AFTYINLDK.A	AFTYINLDK	1	0.9974	1	478	486	9	1083.56	0h
sp|P02786|TFR1_HUMAN	K.ILNIFGVIK.G	ILNIFGVIK	1	0.9998	14	386	394	9	1015.64	0h
sp|P02786|TFR1_HUMAN	K.HPVTGQFLYQDSNWASK.V	HPVTGQFLYQDSNWASK	1	1	12	515	531	17	1976.94	0h
sp|P02786|TFR1_HUMAN	R.HVFWGSGSHTLPALLENLK.L	HVFWGSGSHTLPALLENLK	1	1	21	699	717	19	2105.1	0h
sp|P02786|TFR1_HUMAN	K.LAQMFSDMVLK.D	LAQMFSDMVLK	1	1	4	429	439	11	1281.64	0h
sp|P02786|TFR1_HUMAN	K.LAVDEEENADNNTK.A	LAVDEEENADNNTK	1	1	15	40	53	14	1560.69	0h
sp|P02786|TFR1_HUMAN	K.LLNENSYVPR.E	LLNENSYVPR	1	1	5	146	155	10	1203.62	0h
sp|P02786|TFR1_HUMAN	R.SAFSNLFGGEPLSYTR.F	SAFSNLFGGEPLSYTR	1	1	9	7	22	16	1744.84	0h
sp|P02786|TFR1_HUMAN	K.VSASPLLYTLIEK.T	VSASPLLYTLIEK	1	1	11	496	508	13	1432.82	0h
sp|P03905|NU4M_HUMAN	K.LIVPTIMLLPLTWLSK.K	LIVPTIMLLPLTWLSK	2	1	15	4	19	16	1837.11	0h
sp|P03928|ATP8_HUMAN	K.NYNKPWEPK.W	NYNKPWEPK	2	0.9998	4	46	54	9	1174.58	0h
sp|P04040|CATA_HUMAN	R.GPLLVQDVVFTDEMAHFDRER.I	GPLLVQDVVFTDEMAHFDRER	1	0.9755	2	48	68	21	2473.2	0h
sp|P04040|CATA_HUMAN	X.VWPHKDYPLIPVGK.X	VWPHKDYPLIPVGK	1	0.9815	1	302	315	14	1647.91	0h
sp|P04040|CATA_HUMAN	K.LNVITVGPR.G	LNVITVGPR	1	0.99	1	39	47	9	967.58	0h
sp|P04040|CATA_HUMAN	R.DLFNAIATGK.Y	DLFNAIATGK	1	0.9911	4	264	273	10	1048.55	0h
sp|P04040|CATA_HUMAN	X.FSTVAGESGSADTVRDPR.X	FSTVAGESGSADTVRDPR	1	0.9962	2	113	130	18	1850.87	0h
sp|P04040|CATA_HUMAN	R.LFAYPDTHR.H	LFAYPDTHR	1	0.9965	4	355	363	9	1118.55	0h
sp|P04040|CATA_HUMAN	R.DPILFPSFIHSQK.R	DPILFPSFIHSQK	1	0.997	1	157	169	13	1527.81	0h
sp|P04040|CATA_HUMAN	K.NLSVEDAAR.L	NLSVEDAAR	1	0.999	4	244	252	9	973.482	0h
sp|P04040|CATA_HUMAN	K.ADVLTTGAGNPVGDK.L	ADVLTTGAGNPVGDK	1	1	7	24	38	15	1413.71	0h
sp|P04040|CATA_HUMAN	K.ADVLTTGAGNPVGDKLNVITVGPR.G	ADVLTTGAGNPVGDKLNVITVGPR	1	1	1	24	47	24	2363.28	0h
sp|P04040|CATA_HUMAN	R.AFYVNVLNEEQR.K	AFYVNVLNEEQR	1	1	13	445	456	12	1480.73	0h
sp|P04040|CATA_HUMAN	R.GPLLVQDVVFTDEMAHFDR.E	GPLLVQDVVFTDEMAHFDR	1	1	2	48	66	19	2188.06	0h
sp|P04040|CATA_HUMAN	X.LSQEDPDYGIR.X	LSQEDPDYGIR	1	1	7	253	263	11	1291.6	0h
sp|P04040|CATA_HUMAN	K.NAIHTFVQSGSHLAAR.E	NAIHTFVQSGSHLAAR	1	1	4	507	522	16	1707.88	0h
sp|P04040|CATA_HUMAN	R.NPVNYFAEVEQIAFDPSNMPPGIEASPDK.M	NPVNYFAEVEQIAFDPSNMPPGIEASPDK	1	1	5	321	349	29	3175.48	0h
sp|P04075|ALDOA_HUMAN	K.RLQSIGTENTEENRR.F	RLQSIGTENTEENRR	1	0.9631	1	43	57	15	1801.9	0h
sp|P04075|ALDOA_HUMAN	R.ALQASALK.A	ALQASALK	1	0.9896	12	305	312	8	800.474	0h
sp|P04075|ALDOA_HUMAN	K.FSHEEIAMATVTALRR.T	FSHEEIAMATVTALRR	1	0.9933	2	244	259	16	1830.94	0h
sp|P04075|ALDOA_HUMAN	K.GGVVGIKVDK.G	GGVVGIKVDK	1	0.9986	1	102	111	10	970.576	0h
sp|P04075|ALDOA_HUMAN	R.LQSIGTENTEENRR.F	LQSIGTENTEENRR	1	0.9989	14	44	57	14	1645.8	0h
sp|P04075|ALDOA_HUMAN	K.AAQEEYVKR.A	AAQEEYVKR	1	1	15	323	331	9	1092.56	0h
sp|P04075|ALDOA_HUMAN	K.ADDGRPFPQVIK.S	ADDGRPFPQVIK	1	1	14	88	99	12	1341.7	0h
sp|P04075|ALDOA_HUMAN	R.ALANSLACQGK.Y	ALANSLACQGK	1	1	4	332	342	11	1074.55	0h
sp|P04075|ALDOA_HUMAN	K.ELSDIAHR.I	ELSDIAHR	1	1	26	15	22	8	939.477	0h
sp|P04075|ALDOA_HUMAN	K.FSHEEIAMATVTALR.R	FSHEEIAMATVTALR	1	1	34	244	258	15	1674.84	0h
sp|P04075|ALDOA_HUMAN	K.GILAADESTGSIAK.R	GILAADESTGSIAK	1	1	19	29	42	14	1331.69	0h
sp|P04075|ALDOA_HUMAN	K.GVVPLAGTNGETTTQGLDGLSER.C	GVVPLAGTNGETTTQGLDGLSER	1	1	22	112	134	23	2271.13	0h
sp|P04075|ALDOA_HUMAN	K.IGEHTPSALAIMENANVLAR.Y	IGEHTPSALAIMENANVLAR	1	1	51	154	173	20	2106.09	0h
sp|P04075|ALDOA_HUMAN	R.LQSIGTENTEENR.R	LQSIGTENTEENR	1	1	15	44	56	13	1489.7	0h
sp|P04075|ALDOA_HUMAN	X.PYQYPALTPEQK.X	PYQYPALTPEQK	1	1	19	2	13	12	1433.72	0h
sp|P04075|ALDOA_HUMAN	X.PYQYPALTPEQKK.X	PYQYPALTPEQKK	1	1	6	2	14	13	1561.81	0h
sp|P04075|ALDOA_HUMAN	R.QLLLTADDR.V	QLLLTADDR	1	1	9	61	69	9	1043.56	0h
sp|P04075|ALDOA_HUMAN	R.TVPPAVTGITFLSGGQSEEEASINLNAINK.C	TVPPAVTGITFLSGGQSEEEASINLNAINK	1	1	37	260	289	30	3056.57	0h
sp|P04075|ALDOA_HUMAN	K.VDKGVVPLAGTNGETTTQGLDGLSER.C	VDKGVVPLAGTNGETTTQGLDGLSER	1	1	8	109	134	26	2613.32	0h
sp|P04075|ALDOA_HUMAN	R.VNPCIGGVILFHETLYQK.A	VNPCIGGVILFHETLYQK	1	1	6	70	87	18	2030.06	0h
sp|P04075|ALDOA_HUMAN	K.YTPSGQAGAAASESLFVSNHAY.-	YTPSGQAGAAASESLFVSNHAY	1	1	18	343	364	22	2227.02	0h
sp|P04080|CYTB_HUMAN	X.VFQSLPHENKPLTLSNYQTNK.X	VFQSLPHENKPLTLSNYQTNK	2	1	1	69	89	21	2457.26	0h
sp|P04083|ANXA1_HUMAN	R.SEIDMNDIK.A	SEIDMNDIK	2	0.9888	3	304	312	9	1063.48	0h
sp|P04083|ANXA1_HUMAN	K.AAYLQETGKPLDETLKK.A	AAYLQETGKPLDETLKK	4	1	2	82	98	17	1904.02	0h
sp|P04083|ANXA1_HUMAN	K.ALTGHLEEVVLALLK.T	ALTGHLEEVVLALLK	4	1	16	99	113	15	1604.95	0h
sp|P04083|ANXA1_HUMAN	K.GDRSEDFGVNEDLADSDAR.A	GDRSEDFGVNEDLADSDAR	2	1	1	186	204	19	2066.88	0h
sp|P04083|ANXA1_HUMAN	K.GGPGSAVSPYPTFNPSSDVAALHK.A	GGPGSAVSPYPTFNPSSDVAALHK	4	1	15	30	53	24	2355.15	0h
sp|P04083|ANXA1_HUMAN	K.GLGTDEDTLIEILASR.T	GLGTDEDTLIEILASR	3	1	23	129	144	16	1701.88	0h
sp|P04083|ANXA1_HUMAN	K.GTDVNVFNTILTTR.S	GTDVNVFNTILTTR	2	1	15	215	228	14	1549.81	0h
sp|P04083|ANXA1_HUMAN	X.GVDEATIIDILTK.X	GVDEATIIDILTK	4	1	3	59	71	13	1386.76	0h
sp|P04083|ANXA1_HUMAN	K.GVDEATIIDILTKR.N	GVDEATIIDILTKR	4	1	5	59	72	14	1542.86	0h
sp|P04083|ANXA1_HUMAN	K.QAWFIENEEQEYVQTVK.S	QAWFIENEEQEYVQTVK	4	1	5	10	26	17	2140.01	0h
sp|P04083|ANXA1_HUMAN	R.SEDFGVNEDLADSDAR.A	SEDFGVNEDLADSDAR	2	1	10	189	204	16	1738.73	0h
sp|P04083|ANXA1_HUMAN	K.TPAQFDADELR.A	TPAQFDADELR	3	1	5	114	124	11	1261.59	0h
sp|P04222|1C03_HUMAN	X.THVTHHPVSDHEATLR.X	THVTHHPVSDHEATLR	30	1	1	211	226	16	1835.9	0h
sp|P04264|K2C1_HUMAN	K.SLNNQFASFIDK.V	SLNNQFASFIDK	3	0.9711	2	186	197	12	1382.68	0h
sp|P04264|K2C1_HUMAN	K.AQYEDIAQK.S	AQYEDIAQK	2	0.9743	1	356	364	9	1064.51	0h
sp|P04264|K2C1_HUMAN	K.QISNLQQSISDAEQR.G	QISNLQQSISDAEQR	4	1	1	418	432	15	1715.85	0h
sp|P04264|K2C1_HUMAN	R.THNLEPYFESFINNLR.R	THNLEPYFESFINNLR	3	1	4	224	239	16	1992.97	0h
sp|P04350|TBB4_HUMAN	K.MAATFIGNSTAIQELFK.R	MAATFIGNSTAIQELFK	3	0.984	1	363	379	17	1840.94	0h
sp|P04350|TBB4_HUMAN	X.ALTVPELTQQMFDAK.X	ALTVPELTQQMFDAK	5	1	9	283	297	15	1690.86	0h
sp|P04350|TBB4_HUMAN	X.AVLVDLEPGTMDSVR.X	AVLVDLEPGTMDSVR	6	1	15	63	77	15	1600.81	0h
sp|P04350|TBB4_HUMAN	X.FWEVISDEHGIDPTGTYHGDSDLQLER.X	FWEVISDEHGIDPTGTYHGDSDLQLER	3	1	9	20	46	27	3115.41	0h
sp|P04350|TBB4_HUMAN	X.ISEQFTAMFR.X	ISEQFTAMFR	14	1	38	381	390	10	1228.59	0h
sp|P04350|TBB4_HUMAN	X.LTTPTYGDLNHLVSATMSGVTTCLR.X	LTTPTYGDLNHLVSATMSGVTTCLR	9	1	12	217	241	25	2650.31	0h
sp|P04350|TBB4_HUMAN	X.NSSYFVEWIPNNVK.X	NSSYFVEWIPNNVK	16	1	23	337	350	14	1695.82	0h
sp|P04350|TBB4_HUMAN	X.SGPFGQIFRPDNFVFGQSGAGNNWAK.X	SGPFGQIFRPDNFVFGQSGAGNNWAK	10	1	35	78	103	26	2797.33	0h
sp|P04406|G3P_HUMAN	R.LEKPAKYDDIK.K	LEKPAKYDDIK	4	0.901	1	249	259	11	1318.71	0h
sp|P04406|G3P_HUMAN	K.VIHDNFGIVEGLMTTVHAITATQKTVDGPSGK.L	VIHDNFGIVEGLMTTVHAITATQKTVDGPSGK	3	0.957	2	163	194	32	3335.71	0h
sp|P04406|G3P_HUMAN	K.QASEGPLK.G	QASEGPLK	4	0.9749	6	264	271	8	828.433	0h
sp|P04406|G3P_HUMAN	K.VIPELNGK.L	VIPELNGK	4	0.9857	2	220	227	8	868.5	0h
sp|P04406|G3P_HUMAN	R.VIISAPSADAPMFVMGVNHEKYDNSLK.I	VIISAPSADAPMFVMGVNHEKYDNSLK	4	0.9998	4	119	145	27	2932.44	0h
sp|P04406|G3P_HUMAN	K.AGAHLQGGAK.R	AGAHLQGGAK	4	1	6	108	117	10	908.48	0h
sp|P04406|G3P_HUMAN	R.GALQNIIPASTGAAK.A	GALQNIIPASTGAAK	4	1	29	201	215	15	1410.78	0h
sp|P04406|G3P_HUMAN	K.GILGYTEHQVVSSDFNSDTHSSTFDAGAGIALNDHFVK.L	GILGYTEHQVVSSDFNSDTHSSTFDAGAGIALNDHFVK	4	1	250	272	309	38	4035.88	0h
sp|P04406|G3P_HUMAN	K.IISNASCTTNCLAPLAK.V	IISNASCTTNCLAPLAK	4	1	3	146	162	17	1718.87	0h
sp|P04406|G3P_HUMAN	R.LEKPAKYDDIKK.V	LEKPAKYDDIKK	4	1	14	249	260	12	1446.8	0h
sp|P04406|G3P_HUMAN	K.LISWYDNEFGYSNR.V	LISWYDNEFGYSNR	4	1	89	310	323	14	1762.79	0h
sp|P04406|G3P_HUMAN	K.LVINGNPITIFQER.D	LVINGNPITIFQER	3	1	36	67	80	14	1612.89	0h
sp|P04406|G3P_HUMAN	K.LVINGNPITIFQERDPSK.I	LVINGNPITIFQERDPSK	3	1	24	67	84	18	2040.1	0h
sp|P04406|G3P_HUMAN	K.RVIISAPSADAPMFVMGVNHEK.Y	RVIISAPSADAPMFVMGVNHEK	4	1	18	118	139	22	2368.2	0h
sp|P04406|G3P_HUMAN	K.VDIVAINDPFIDLNYMVYMFQYDSTHGK.F	VDIVAINDPFIDLNYMVYMFQYDSTHGK	2	1	13	28	55	28	3307.55	0h
sp|P04406|G3P_HUMAN	K.VIHDNFGIVEGLMTTVHAITATQK.T	VIHDNFGIVEGLMTTVHAITATQK	3	1	144	163	186	24	2594.35	0h
sp|P04406|G3P_HUMAN	R.VIISAPSADAPMFVMGVNHEK.Y	VIISAPSADAPMFVMGVNHEK	4	1	30	119	139	21	2212.1	0h
sp|P04406|G3P_HUMAN	R.VPTANVSVVDLTCR.L	VPTANVSVVDLTCR	4	1	15	235	248	14	1472.76	0h
sp|P04406|G3P_HUMAN	R.VVDLMAHMASK.E	VVDLMAHMASK	4	1	12	324	334	11	1200.6	0h
sp|P04406|G3P_HUMAN	R.VVDLMAHMASKE.-	VVDLMAHMASKE	4	1	20	324	335	12	1329.64	0h
sp|P04406|G3P_HUMAN	K.WGDAGAEYVVESTGVFTTMEK.A	WGDAGAEYVVESTGVFTTMEK	4	1	159	87	107	21	2276.03	0h
sp|P04632|CPNS1_HUMAN	R.ILGGVISAISEAAAQYNPEPPPPR.T	ILGGVISAISEAAAQYNPEPPPPR	1	1	3	61	84	24	2446.28	0h
sp|P04632|CPNS1_HUMAN	R.LFAQLAGDDMEVSATELMNILNK.V	LFAQLAGDDMEVSATELMNILNK	1	1	10	104	126	23	2522.24	0h
sp|P04632|CPNS1_HUMAN	X.RLFAQLAGDDMEVSATELMNILNK.X	RLFAQLAGDDMEVSATELMNILNK	1	1	1	103	126	24	2678.34	0h
sp|P04632|CPNS1_HUMAN	R.SMVAVMDSDTTGK.L	SMVAVMDSDTTGK	1	1	2	146	158	13	1340.59	0h
sp|P04818|TYSY_HUMAN	R.DMESDYSGQGVDQLQR.V	DMESDYSGQGVDQLQR	2	1	1	148	163	16	1826.77	0h
sp|P04818|TYSY_HUMAN	K.GVLEELLWFIK.G	GVLEELLWFIK	3	1	5	83	93	11	1345.76	0h
sp|P04839|CY24B_HUMAN	K.TIASQHPNTR.I	TIASQHPNTR	1	0.9989	3	522	531	10	1123.57	0h
sp|P04843|RPN1_HUMAN	X.QFVVFEGNHYFYSPYPTK.X	QFVVFEGNHYFYSPYPTK	1	0.9893	2	152	169	18	2222.04	0h
sp|P04843|RPN1_HUMAN	K.ISVIVETVYTHVLHPYPTQITQSEK.Q	ISVIVETVYTHVLHPYPTQITQSEK	1	0.9945	8	127	151	25	2881.52	0h
sp|P04843|RPN1_HUMAN	K.TILPAAAQDVYYR.D	TILPAAAQDVYYR	2	0.9962	1	282	294	13	1479.77	0h
sp|P04843|RPN1_HUMAN	R.DISTLNSGKK.S	DISTLNSGKK	2	0.9974	1	508	517	10	1061.57	0h
sp|P04843|RPN1_HUMAN	K.IDHILDAL.-	IDHILDAL	2	0.9999	14	600	607	8	908.496	0h
sp|P04843|RPN1_HUMAN	K.ALTSEIALLQSR.L	ALTSEIALLQSR	2	1	13	525	536	12	1300.73	0h
sp|P04843|RPN1_HUMAN	R.ATSFLLALEPELEAR.L	ATSFLLALEPELEAR	1	1	15	66	80	15	1658.89	0h
sp|P04843|RPN1_HUMAN	R.FPLFGGWK.T	FPLFGGWK	2	1	7	320	327	8	950.498	0h
sp|P04843|RPN1_HUMAN	K.GEDEEENNLEVR.E	GEDEEENNLEVR	1	1	10	90	101	12	1431.61	0h
sp|P04843|RPN1_HUMAN	X.LAHLGVQVK.X	LAHLGVQVK	1	1	6	81	89	9	963.584	0h
sp|P04843|RPN1_HUMAN	K.LPVALDPGAK.I	LPVALDPGAK	1	1	4	117	126	10	979.568	0h
sp|P04843|RPN1_HUMAN	K.NIEIDSPYEISR.A	NIEIDSPYEISR	2	1	2	380	391	12	1434.7	0h
sp|P04843|RPN1_HUMAN	R.SEDLLDYGPFR.D	SEDLLDYGPFR	2	1	10	194	204	11	1310.61	0h
sp|P04843|RPN1_HUMAN	X.THYIVGYNLPSYEYLYNLGDQYALK.X	THYIVGYNLPSYEYLYNLGDQYALK	2	1	1	328	352	25	2996.46	0h
sp|P04843|RPN1_HUMAN	R.TVDLSSHLAK.V	TVDLSSHLAK	1	1	7	39	48	10	1069.58	0h
sp|P04843|RPN1_HUMAN	K.VTAEVVLAHLGGGSTSR.A	VTAEVVLAHLGGGSTSR	1	1	8	49	65	17	1652.88	0h
sp|P04844|RPN2_HUMAN	K.LMDHVGTEPSIKEDQVIQLMNAIFSK.K	LMDHVGTEPSIKEDQVIQLMNAIFSK	7	0.9401	1	218	243	26	2942.49	0h
sp|P04844|RPN2_HUMAN	K.QEIQHLFR.E	QEIQHLFR	4	0.9643	1	524	531	8	1069.57	0h
sp|P04844|RPN2_HUMAN	K.FELDTSER.K	FELDTSER	5	0.99	3	461	468	8	995.456	0h
sp|P04844|RPN2_HUMAN	K.NPILWNVADVVIK.F	NPILWNVADVVIK	6	0.9991	3	492	504	13	1479.84	0h
sp|P04844|RPN2_HUMAN	K.ASLDRPFTNLESAFYSIVGLSSLGAQVPDAK.K	ASLDRPFTNLESAFYSIVGLSSLGAQVPDAK	4	1	17	39	69	31	3252.66	0h
sp|P04844|RPN2_HUMAN	K.EDQVIQLMNAIFSK.K	EDQVIQLMNAIFSK	7	1	14	230	243	14	1634.83	0h
sp|P04844|RPN2_HUMAN	K.FPEEEAPSTVLSQNLFTPK.Q	FPEEEAPSTVLSQNLFTPK	6	1	10	505	523	19	2133.06	0h
sp|P04844|RPN2_HUMAN	R.LQVTNVLSQPLTQATVK.L	LQVTNVLSQPLTQATVK	6	1	1	290	306	17	1839.05	0h
sp|P04844|RPN2_HUMAN	X.LSKEETVLATVQALQTASHLSQQADLR.X	LSKEETVLATVQALQTASHLSQQADLR	2	1	8	152	178	27	2936.56	0h
sp|P04844|RPN2_HUMAN	K.NPILWNVADVVIKFPEEEAPSTVLSQNLFTPK.Q	NPILWNVADVVIKFPEEEAPSTVLSQNLFTPK	6	1	15	492	523	32	3594.89	0h
sp|P04844|RPN2_HUMAN	R.SIVEEIEDLVAR.L	SIVEEIEDLVAR	7	1	14	179	190	12	1371.72	0h
sp|P04844|RPN2_HUMAN	K.TGQEVVFVAEPDNK.N	TGQEVVFVAEPDNK	5	1	5	443	456	14	1531.75	0h
sp|P04844|RPN2_HUMAN	X.YHVPVVVVPEGSASDTHEQAILR.X	YHVPVVVVPEGSASDTHEQAILR	6	1	13	267	289	23	2502.28	0h
sp|P04899|GNAI2_HUMAN	R.EYQLNDSAAYYLNDLER.I	EYQLNDSAAYYLNDLER	4	1	6	146	162	17	2075.94	0h
sp|P04899|GNAI2_HUMAN	R.IAQSDYIPTQQDVLR.T	IAQSDYIPTQQDVLR	4	1	11	163	177	15	1745.89	0h
sp|P04899|GNAI2_HUMAN	K.YDEAASYIQSK.F	YDEAASYIQSK	4	1	6	297	307	11	1273.58	0h
sp|P04908|H2A1B_HUMAN	X.AGLQFPVGR.X	AGLQFPVGR	22	1	56	22	30	9	943.522	0h
sp|P04908|H2A1B_HUMAN	X.HLQLAIRNDEELNK.X	HLQLAIRNDEELNK	16	1	5	83	96	14	1691.89	0h
sp|P04908|H2A1B_HUMAN	R.NDEELNKLLGR.V	NDEELNKLLGR	4	1	4	90	100	11	1299.68	0h
sp|P04908|H2A1B_HUMAN	X.VTIAQGGVLPNIQAVLLPK.X	VTIAQGGVLPNIQAVLLPK	13	1	343	101	119	19	1930.16	0h
sp|P05023|AT1A1_HUMAN	X.LIFDNLKK.X	LIFDNLKK	10	0.9776	1	767	774	8	989.588	0h
sp|P05023|AT1A1_HUMAN	R.LNIPVSQVNPR.D	LNIPVSQVNPR	3	0.9932	2	648	658	11	1235.7	0h
sp|P05023|AT1A1_HUMAN	K.NMVPQQALVIR.N	NMVPQQALVIR	9	0.9964	7	163	173	11	1267.71	0h
sp|P05023|AT1A1_HUMAN	X.VIMVTGDHPITAK.X	VIMVTGDHPITAK	11	0.9966	3	613	625	13	1380.74	0h
sp|P05023|AT1A1_HUMAN	R.DKYEPAAVSEQGDKK.G	DKYEPAAVSEQGDKK	2	0.9987	3	8	22	15	1663.8	0h
sp|P05023|AT1A1_HUMAN	R.AVFQANQENLPILK.R	AVFQANQENLPILK	2	1	3	431	444	14	1583.87	0h
sp|P05023|AT1A1_HUMAN	R.DGPNALTPPPTTPEWIK.F	DGPNALTPPPTTPEWIK	4	1	12	75	91	17	1832.93	0h
sp|P05023|AT1A1_HUMAN	K.DMTSEQLDDILK.Y	DMTSEQLDDILK	1	1	5	672	683	12	1406.66	0h
sp|P05023|AT1A1_HUMAN	K.EQPLDEELKDAFQNAYLELGGLGER.V	EQPLDEELKDAFQNAYLELGGLGER	2	1	2	527	551	25	2833.38	0h
sp|P05023|AT1A1_HUMAN	K.GVGIISEGNETVEDIAAR.L	GVGIISEGNETVEDIAAR	6	1	14	630	647	18	1828.91	0h
sp|P05023|AT1A1_HUMAN	X.SPDFTNENPLETR.X	SPDFTNENPLETR	2	1	2	228	240	13	1518.7	0h
sp|P05023|AT1A1_HUMAN	K.VDNSSLTGESEPQTR.S	VDNSSLTGESEPQTR	7	1	14	213	227	15	1618.74	0h
sp|P05109|S10A8_HUMAN	X.ALNSIIDVYHK.X	ALNSIIDVYHK	1	0.904	1	8	18	11	1271.68	0h
sp|P05114|HMGN1_HUMAN	X.QAEVANQETKEDLPAENGETK.X	QAEVANQETKEDLPAENGETK	4	0.9985	2	62	82	21	2300.08	0h
sp|P05114|HMGN1_HUMAN	R.LSAKPPAK.V	LSAKPPAK	6	1	9	24	31	8	810.494	0h
sp|P05114|HMGN1_HUMAN	K.TEESPASDEAGEK.E	TEESPASDEAGEK	5	1	2	83	95	13	1348.56	0h
sp|P05114|HMGN1_HUMAN	K.TEESPASDEAGEKEAK.S	TEESPASDEAGEKEAK	5	1	1	83	98	16	1676.74	0h
sp|P05114|HMGN1_HUMAN	X.VSSAEGAAKEEPK.X	VSSAEGAAKEEPK	3	1	9	6	18	13	1301.64	0h
sp|P05141|ADT2_HUMAN	K.TAVAPIER.V	TAVAPIER	5	0.9818	2	24	31	8	855.481	0h
sp|P05141|ADT2_HUMAN	X.GMGGAFVLVLYDEIKK.X	GMGGAFVLVLYDEIKK	2	0.9963	11	281	296	16	1738.93	0h
sp|P05141|ADT2_HUMAN	K.EQGVLSFWR.G	EQGVLSFWR	3	0.9969	3	64	72	9	1120.57	0h
sp|P05141|ADT2_HUMAN	X.LLLQVQHASK.X	LLLQVQHASK	4	0.9993	5	34	43	10	1135.67	0h
sp|P05141|ADT2_HUMAN	R.YFPTQALNFAFK.D	YFPTQALNFAFK	5	0.9999	2	81	92	12	1445.73	0h
sp|P05141|ADT2_HUMAN	K.DFLAGGVAAAISK.T	DFLAGGVAAAISK	1	1	12	11	23	13	1218.66	0h
sp|P05141|ADT2_HUMAN	K.QIFLGGVDKR.T	QIFLGGVDKR	1	1	3	97	106	10	1131.64	0h
sp|P05164|PERM_HUMAN	R.GLMATPAK.L	GLMATPAK	2	0.9965	9	549	556	8	787.424	0h
sp|P05164|PERM_HUMAN	X.YGHTLIQPFMFR.X	YGHTLIQPFMFR	1	0.9971	11	500	511	12	1508.76	0h
sp|P05164|PERM_HUMAN	R.YQPMEPNPR.V	YQPMEPNPR	1	0.9973	9	516	524	9	1130.52	0h
sp|P05164|PERM_HUMAN	X.QNQIAVDEIRER.X	QNQIAVDEIRER	1	0.9974	10	560	571	12	1469.76	0h
sp|P05164|PERM_HUMAN	R.AVSNEIVR.F	AVSNEIVR	1	0.999	21	229	236	8	886.486	0h
sp|P05164|PERM_HUMAN	R.AADYLHVALDLLER.K	AADYLHVALDLLER	1	1	46	115	128	14	1597.85	0h
sp|P05164|PERM_HUMAN	R.DFVNCSTLPALNLASWR.E	DFVNCSTLPALNLASWR	1	1	5	726	742	17	1905.94	0h
sp|P05164|PERM_HUMAN	R.DHGLPGYNAWR.R	DHGLPGYNAWR	2	1	15	593	603	11	1284.6	0h
sp|P05164|PERM_HUMAN	R.DYLPLVLGPTAMR.K	DYLPLVLGPTAMR	1	1	8	461	473	13	1444.77	0h
sp|P05164|PERM_HUMAN	R.FCGLPQPETVGQLGTVLR.N	FCGLPQPETVGQLGTVLR	1	1	15	605	622	18	1914	0h
sp|P05164|PERM_HUMAN	R.FPTDQLTPDQER.S	FPTDQLTPDQER	1	1	15	237	248	12	1445.68	0h
sp|P05164|PERM_HUMAN	R.FWWENEGVFSMQQR.Q	FWWENEGVFSMQQR	1	1	30	678	691	14	1842.81	0h
sp|P05164|PERM_HUMAN	R.IANVFTNAFR.Y	IANVFTNAFR	1	1	23	490	499	10	1151.61	0h
sp|P05164|PERM_HUMAN	R.IGLDLPALNMQR.S	IGLDLPALNMQR	1	1	14	579	590	12	1339.73	0h
sp|P05164|PERM_HUMAN	R.IICDNTGITTVSK.N	IICDNTGITTVSK	1	1	8	702	714	13	1363.7	0h
sp|P05164|PERM_HUMAN	R.IKNQADCIPFFR.S	IKNQADCIPFFR	1	1	4	303	314	12	1450.74	0h
sp|P05164|PERM_HUMAN	R.IPCFLAGDTR.S	IPCFLAGDTR	2	1	11	396	405	10	1091.54	0h
sp|P05164|PERM_HUMAN	K.IVGAMVQIITYR.D	IVGAMVQIITYR	1	1	12	449	460	12	1362.77	0h
sp|P05164|PERM_HUMAN	R.KIVGAMVQIITYR.D	KIVGAMVQIITYR	1	1	19	448	460	13	1490.86	0h
sp|P05164|PERM_HUMAN	R.KLMEQYGTPNNIDIWMGGVSEPLK.R	KLMEQYGTPNNIDIWMGGVSEPLK	1	1	17	629	652	24	2719.33	0h
sp|P05164|PERM_HUMAN	R.KLMEQYGTPNNIDIWMGGVSEPLKR.K	KLMEQYGTPNNIDIWMGGVSEPLKR	1	1	23	629	653	25	2875.43	0h
sp|P05164|PERM_HUMAN	K.LMEQYGTPNNIDIWMGGVSEPLKR.K	LMEQYGTPNNIDIWMGGVSEPLKR	1	1	14	630	653	24	2747.34	0h
sp|P05164|PERM_HUMAN	K.NNIFMSNSYPR.D	NNIFMSNSYPR	1	1	9	715	725	11	1341.61	0h
sp|P05164|PERM_HUMAN	K.NQADCIPFFR.S	NQADCIPFFR	1	1	10	305	314	10	1209.56	0h
sp|P05164|PERM_HUMAN	R.NQINALTSFVDASMVYGSEEPLAR.N	NQINALTSFVDASMVYGSEEPLAR	1	1	36	328	351	24	2611.26	0h
sp|P05164|PERM_HUMAN	R.QALAQISLPR.I	QALAQISLPR	1	1	17	692	701	10	1095.64	0h
sp|P05164|PERM_HUMAN	R.QNQIAVDEIR.E	QNQIAVDEIR	1	1	10	560	569	10	1184.62	0h
sp|P05164|PERM_HUMAN	R.RSPTLGASNR.A	RSPTLGASNR	1	1	4	184	193	10	1057.56	0h
sp|P05164|PERM_HUMAN	R.SGSASPMELLSYFK.Q	SGSASPMELLSYFK	1	1	14	90	103	14	1515.72	0h
sp|P05164|PERM_HUMAN	R.SLMFMQWGQLLDHDLDFTPEPAAR.A	SLMFMQWGQLLDHDLDFTPEPAAR	1	1	53	249	272	24	2817.32	0h
sp|P05164|PERM_HUMAN	R.SRDHGLPGYNAWR.R	SRDHGLPGYNAWR	2	1	9	591	603	13	1527.73	0h
sp|P05164|PERM_HUMAN	X.SSEMPELTSMHTLLLR.X	SSEMPELTSMHTLLLR	1	1	13	406	421	16	1843.92	0h
sp|P05164|PERM_HUMAN	R.VGPLLACIIGTQFR.K	VGPLLACIIGTQFR	1	1	30	657	670	14	1486.83	0h
sp|P05164|PERM_HUMAN	R.VVLEGGIDPILR.G	VVLEGGIDPILR	1	1	15	537	548	12	1279.75	0h
sp|P05164|PERM_HUMAN	R.WLPAEYEDGFSLPYGWTPGVK.R	WLPAEYEDGFSLPYGWTPGVK	1	1	10	198	218	21	2411.14	0h
sp|P05198|IF2A_HUMAN	K.INLIAPPR.Y	INLIAPPR	2	0.9974	3	227	234	8	892.549	0h
sp|P05198|IF2A_HUMAN	R.TEGLSVLSQAMAVIK.E	TEGLSVLSQAMAVIK	2	1	15	245	259	15	1545.84	0h
sp|P05198|IF2A_HUMAN	K.VVTDTDETELAR.Q	VVTDTDETELAR	2	1	14	277	288	12	1347.65	0h
sp|P05204|HMGN2_HUMAN	K.EGNNPAENGDAKTDQAQKAEGAGDAK.-	EGNNPAENGDAKTDQAQKAEGAGDAK	1	0.9749	3	65	90	26	2585.16	0h
sp|P05204|HMGN2_HUMAN	K.ADAGKEGNNPAENGDAK.T	ADAGKEGNNPAENGDAK	1	0.9832	2	60	76	17	1656.73	0h
sp|P05204|HMGN2_HUMAN	K.ADAGKEGNNPAENGDAKTDQAQK.A	ADAGKEGNNPAENGDAKTDQAQK	1	0.9868	4	60	82	23	2328.05	0h
sp|P05204|HMGN2_HUMAN	K.EGNNPAENGDAKTDQAQK.A	EGNNPAENGDAKTDQAQK	1	0.9984	14	65	82	18	1885.84	0h
sp|P05204|HMGN2_HUMAN	K.EGNNPAENGDAK.T	EGNNPAENGDAK	1	1	4	65	76	12	1214.52	0h
sp|P05204|HMGN2_HUMAN	R.LSAKPAPPKPEPKPK.K	LSAKPAPPKPEPKPK	1	1	18	28	42	15	1583.94	0h
sp|P05204|HMGN2_HUMAN	K.TDQAQKAEGAGDAK.-	TDQAQKAEGAGDAK	1	1	10	77	90	14	1388.65	0h
sp|P05386|RLA1_HUMAN	K.AAGVNVEPFWPGLFAK.A	AAGVNVEPFWPGLFAK	1	1	25	34	49	16	1701.88	0h
sp|P05387|RLA2_HUMAN	K.ILDSVGIEADDDRLNK.V	ILDSVGIEADDDRLNK	2	1	26	26	41	16	1771.89	0h
sp|P05387|RLA2_HUMAN	K.KILDSVGIEADDDRLNK.V	KILDSVGIEADDDRLNK	2	1	4	25	41	17	1899.99	0h
sp|P05387|RLA2_HUMAN	K.LASVPAGGAVAVSAAPGSAAPAAGSAPAAAEEK.K	LASVPAGGAVAVSAAPGSAAPAAGSAPAAAEEK	2	1	22	62	94	33	2773.42	0h
sp|P05387|RLA2_HUMAN	K.LASVPAGGAVAVSAAPGSAAPAAGSAPAAAEEKKDEK.K	LASVPAGGAVAVSAAPGSAAPAAGSAPAAAEEKKDEK	2	1	9	62	98	37	3273.68	0h
sp|P05387|RLA2_HUMAN	K.NIEDVIAQGIGK.L	NIEDVIAQGIGK	2	1	1	50	61	12	1255.67	0h
sp|P05387|RLA2_HUMAN	R.YVASYLLAALGGNSSPSAK.D	YVASYLLAALGGNSSPSAK	2	1	13	3	21	19	1867.96	0h
sp|P05388|RLA0_HUMAN	K.EDLTEIRDMLLANKVPAAAR.A	EDLTEIRDMLLANKVPAAAR	3	0.9568	3	93	112	20	2225.18	0h
sp|P05388|RLA0_HUMAN	X.GNVGFVFTK.X	GNVGFVFTK	2	0.9751	1	84	92	9	967.509	0h
sp|P05388|RLA0_HUMAN	R.VLALSVETDYTFPLAEK.V	VLALSVETDYTFPLAEK	2	0.9898	2	248	264	17	1894.99	0h
sp|P05388|RLA0_HUMAN	K.AFLADPSAFVAAAPVAAATTAAPAAAAAPAK.V	AFLADPSAFVAAAPVAAATTAAPAAAAAPAK	2	1	18	267	297	31	2751.46	0h
sp|P05388|RLA0_HUMAN	R.AGAIAPCEVTVPAQNTGLGPEK.T	AGAIAPCEVTVPAQNTGLGPEK	3	1	3	113	134	22	2122.07	0h
sp|P05388|RLA0_HUMAN	R.GHLENNPALEK.L	GHLENNPALEK	3	1	13	67	77	11	1220.61	0h
sp|P05388|RLA0_HUMAN	X.GNVGFVFTKEDLTEIR.X	GNVGFVFTKEDLTEIR	2	1	5	84	99	16	1823.94	0h
sp|P05388|RLA0_HUMAN	R.GTIEILSDVQLIK.T	GTIEILSDVQLIK	2	1	10	150	162	13	1427.82	0h
sp|P05388|RLA0_HUMAN	K.IIQLLDDYPK.C	IIQLLDDYPK	3	1	3	17	26	10	1216.67	0h
sp|P05388|RLA0_HUMAN	K.TSFFQALGITTK.I	TSFFQALGITTK	3	1	2	135	146	12	1312.7	0h
sp|P05455|LA_HUMAN	X.EQIKLDEGWVPLEIMIK.X	EQIKLDEGWVPLEIMIK	4	0.9869	7	38	54	17	2040.09	0h
sp|P05455|LA_HUMAN	K.LDEGWVPLEIMIK.F	LDEGWVPLEIMIK	4	0.9979	1	42	54	13	1541.81	0h
sp|P05455|LA_HUMAN	X.GFPTDATLDDIKEWLEDK.X	GFPTDATLDDIKEWLEDK	4	0.9993	6	117	134	18	2092	0h
sp|P05455|LA_HUMAN	X.AELMEISEDKTK.X	AELMEISEDKTK	5	1	2	77	88	12	1392.68	0h
sp|P05455|LA_HUMAN	K.EVTWEVLEGEVEK.E	EVTWEVLEGEVEK	2	1	3	300	312	13	1545.76	0h
sp|P05455|LA_HUMAN	K.GSIFVVFDSIESAK.K	GSIFVVFDSIESAK	4	1	1	152	165	14	1497.77	0h
sp|P05455|LA_HUMAN	K.IIEDQQESLNK.W	IIEDQQESLNK	2	1	8	318	328	11	1315.66	0h
sp|P05455|LA_HUMAN	R.LTTDFNVIVEALSK.S	LTTDFNVIVEALSK	5	1	13	61	74	14	1548.84	0h
sp|P05455|LA_HUMAN	R.NKEVTWEVLEGEVEK.E	NKEVTWEVLEGEVEK	2	1	6	298	312	15	1787.89	0h
sp|P05455|LA_HUMAN	K.QKLEEDAEMK.S	QKLEEDAEMK	2	1	14	215	224	10	1219.57	0h
sp|P05455|LA_HUMAN	K.SKAELMEISEDKTK.I	SKAELMEISEDKTK	5	1	11	75	88	14	1607.81	0h
sp|P05455|LA_HUMAN	K.YKETDLLILFK.D	YKETDLLILFK	2	1	17	175	185	11	1381.78	0h
sp|P05556|ITB1_HUMAN	K.SLGTDLMNEMR.R	SLGTDLMNEMR	1	0.9991	1	164	174	11	1265.57	0h
sp|P06132|DCUP_HUMAN	R.EAGLAPVPMIIFAK.D	EAGLAPVPMIIFAK	1	0.9656	1	250	263	14	1455.81	0h
sp|P06132|DCUP_HUMAN	R.LRDPEVVASELGYVFQAITLTR.Q	LRDPEVVASELGYVFQAITLTR	2	1	13	121	142	22	2476.33	0h
sp|P06396|GELS_HUMAN	K.TPSAAYLWVGTGASEAEK.T	TPSAAYLWVGTGASEAEK	7	0.9999	3	598	615	18	1836.89	0h
sp|P06396|GELS_HUMAN	K.DSQEEEKTEALTSAK.R	DSQEEEKTEALTSAK	5	1	1	714	728	15	1664.77	0h
sp|P06454|PTMA_HUMAN	R.AAEDDEDDDVDTK.K	AAEDDEDDDVDTK	8	1	14	91	103	13	1436.54	0h
sp|P06454|PTMA_HUMAN	R.AAEDDEDDDVDTKK.Q	AAEDDEDDDVDTKK	8	1	36	91	104	14	1564.64	0h
sp|P06454|PTMA_HUMAN	K.EVVEEAENGR.D	EVVEEAENGR	5	1	26	22	31	10	1130.52	0h
sp|P06454|PTMA_HUMAN	K.KEVVEEAENGR.D	KEVVEEAENGR	5	1	15	21	31	11	1258.61	0h
sp|P06454|PTMA_HUMAN	K.RAAEDDEDDDVDTK.K	RAAEDDEDDDVDTK	8	1	15	90	103	14	1592.64	0h
sp|P06454|PTMA_HUMAN	K.RAAEDDEDDDVDTKK.Q	RAAEDDEDDDVDTKK	8	1	14	90	104	15	1720.74	0h
sp|P06493|CDK1_HUMAN	K.KPLFHGDSEIDQLFR.I	KPLFHGDSEIDQLFR	1	1	2	201	215	15	1800.91	0h
sp|P06576|ATPB_HUMAN	K.KGSITSVQAIYVPADDLTDPAPATTFAHLDATTVLSR.A	KGSITSVQAIYVPADDLTDPAPATTFAHLDATTVLSR	1	0.9711	1	351	387	37	3841.97	0h
sp|P06576|ATPB_HUMAN	K.AHGGYSVFAGVGER.T	AHGGYSVFAGVGER	1	0.9905	3	226	239	14	1405.67	0h
sp|P06576|ATPB_HUMAN	K.LVPLKETIK.G	LVPLKETIK	1	0.9984	18	481	489	9	1039.66	0h
sp|P06576|ATPB_HUMAN	K.IGLFGGAGVGK.T	IGLFGGAGVGK	1	0.9992	5	202	212	11	974.55	0h
sp|P06576|ATPB_HUMAN	R.AIAELGIYPAVDPLDSTSR.I	AIAELGIYPAVDPLDSTSR	1	1	21	388	406	19	1987.03	0h
sp|P06576|ATPB_HUMAN	R.DQEGQDVLLFIDNIFR.F	DQEGQDVLLFIDNIFR	1	1	15	295	310	16	1920.96	0h
sp|P06576|ATPB_HUMAN	R.EGNDLYHEMIESGVINLK.D	EGNDLYHEMIESGVINLK	1	1	24	242	259	18	2059.99	0h
sp|P06576|ATPB_HUMAN	R.FLSQPFQVAEVFTGHMGK.L	FLSQPFQVAEVFTGHMGK	1	1	10	463	480	18	2022	0h
sp|P06576|ATPB_HUMAN	R.FTQAGSEVSALLGR.I	FTQAGSEVSALLGR	1	1	2	311	324	14	1434.74	0h
sp|P06576|ATPB_HUMAN	K.GFQQILAGEYDHLPEQAFYMVGPIEEAVAK.A	GFQQILAGEYDHLPEQAFYMVGPIEEAVAK	1	1	10	490	519	30	3349.63	0h
sp|P06576|ATPB_HUMAN	X.GSITSVQAIYVPADDLTDPAPATTFAHLDATTVLSR.X	GSITSVQAIYVPADDLTDPAPATTFAHLDATTVLSR	1	1	2	352	387	36	3713.88	0h
sp|P06576|ATPB_HUMAN	R.IMDPNIVGSEHYDVAR.G	IMDPNIVGSEHYDVAR	1	1	16	407	422	16	1814.86	0h
sp|P06576|ATPB_HUMAN	R.IMNVIGEPIDER.G	IMNVIGEPIDER	1	1	6	144	155	12	1384.7	0h
sp|P06576|ATPB_HUMAN	R.IPSAVGYQPTLATDMGTMQER.I	IPSAVGYQPTLATDMGTMQER	1	1	26	325	345	21	2265.08	0h
sp|P06576|ATPB_HUMAN	K.IPVGPETLGR.I	IPVGPETLGR	1	1	7	134	143	10	1037.59	0h
sp|P06576|ATPB_HUMAN	R.LVLEVAQHLGESTVR.T	LVLEVAQHLGESTVR	1	1	7	95	109	15	1649.91	0h
sp|P06576|ATPB_HUMAN	K.QFAPIHAEAPEFMEMSVEQEILVTGIK.V	QFAPIHAEAPEFMEMSVEQEILVTGIK	1	1	4	162	188	27	3043.5	0h
sp|P06576|ATPB_HUMAN	K.SLQDIIAILGMDELSEEDKLTVSR.A	SLQDIIAILGMDELSEEDKLTVSR	1	1	28	433	456	24	2674.37	0h
sp|P06576|ATPB_HUMAN	R.TIAMDGTEGLVR.G	TIAMDGTEGLVR	1	1	8	110	121	12	1261.63	0h
sp|P06576|ATPB_HUMAN	X.TREGNDLYHEMIESGVINLK.X	TREGNDLYHEMIESGVINLK	1	1	9	240	259	20	2317.14	0h
sp|P06576|ATPB_HUMAN	K.TVLIMELINNVAK.A	TVLIMELINNVAK	1	1	27	213	225	13	1456.83	0h
sp|P06576|ATPB_HUMAN	R.VALTGLTVAEYFR.D	VALTGLTVAEYFR	1	1	12	282	294	13	1438.78	0h
sp|P06576|ATPB_HUMAN	K.VALVYGQMNEPPGAR.A	VALVYGQMNEPPGAR	1	1	12	265	279	15	1600.8	0h
sp|P06576|ATPB_HUMAN	K.VLDSGAPIK.I	VLDSGAPIK	1	1	5	125	133	9	898.51	0h
sp|P06576|ATPB_HUMAN	K.VLDSGAPIKIPVGPETLGR.I	VLDSGAPIKIPVGPETLGR	1	1	13	125	143	19	1918.09	0h
sp|P06576|ATPB_HUMAN	K.VVDLLAPYAK.G	VVDLLAPYAK	1	1	4	189	198	10	1087.62	0h
sp|P06702|S10A9_HUMAN	X.LGHPDTLNQGEFK.X	LGHPDTLNQGEFK	1	0.9898	1	26	38	13	1454.71	0h
sp|P06702|S10A9_HUMAN	K.MHEGDEGPGHHHKPGLGEGTP.-	MHEGDEGPGHHHKPGLGEGTP	1	1	6	94	114	21	2174.95	0h
sp|P06702|S10A9_HUMAN	X.NIETIINTFHQYSVK.X	NIETIINTFHQYSVK	1	1	12	11	25	15	1805.93	0h
sp|P06703|S10A6_HUMAN	-.MACPLDQAIGLLVAIFHK.Y	MACPLDQAIGLLVAIFHK	1	1	7	1	18	18	1939.04	0h
sp|P06730|IF4E_HUMAN	X.DGIEPMWEDEK.X	DGIEPMWEDEK	4	0.9961	1	96	106	11	1347.56	0h
sp|P06733|ENOA_HUMAN	R.NFRNPLAK.-	NFRNPLAK	1	0.9809	1	427	434	8	958.533	0h
sp|P06733|ENOA_HUMAN	R.IEEELGSK.A	IEEELGSK	1	0.9963	26	413	420	8	903.454	0h
sp|P06733|ENOA_HUMAN	K.TIAPALVSK.K	TIAPALVSK	1	0.9992	8	72	80	9	898.547	0h
sp|P06733|ENOA_HUMAN	K.YDLDFKSPDDPSR.Y	YDLDFKSPDDPSR	1	0.9992	1	257	269	13	1553.7	0h
sp|P06733|ENOA_HUMAN	R.AAVPSGASTGIYEALELR.D	AAVPSGASTGIYEALELR	9	1	149	33	50	18	1803.93	0h
sp|P06733|ENOA_HUMAN	R.AAVPSGASTGIYEALELRDNDK.T	AAVPSGASTGIYEALELRDNDK	1	1	5	33	54	22	2276.13	0h
sp|P06733|ENOA_HUMAN	K.AGYTDKVVIGMDVAASEFFR.S	AGYTDKVVIGMDVAASEFFR	1	1	6	234	253	20	2175.06	0h
sp|P06733|ENOA_HUMAN	K.DATNVGDEGGFAPNILENK.E	DATNVGDEGGFAPNILENK	1	1	22	203	221	19	1959.91	0h
sp|P06733|ENOA_HUMAN	K.DATNVGDEGGFAPNILENKEGLELLK.T	DATNVGDEGGFAPNILENKEGLELLK	1	1	17	203	228	26	2742.37	0h
sp|P06733|ENOA_HUMAN	K.DYPVVSIEDPFDQDDWGAWQK.F	DYPVVSIEDPFDQDDWGAWQK	1	1	21	286	306	21	2509.11	0h
sp|P06733|ENOA_HUMAN	K.FTASAGIQVVGDDLTVTNPK.R	FTASAGIQVVGDDLTVTNPK	1	1	222	307	326	20	2032.05	0h
sp|P06733|ENOA_HUMAN	X.FTASAGIQVVGDDLTVTNPKR.X	FTASAGIQVVGDDLTVTNPKR	1	1	7	307	327	21	2188.15	0h
sp|P06733|ENOA_HUMAN	R.GNPTVEVDLFTSK.G	GNPTVEVDLFTSK	1	1	20	16	28	13	1405.71	0h
sp|P06733|ENOA_HUMAN	R.HIADLAGNSEVILPVPAFNVINGGSHAGNK.L	HIADLAGNSEVILPVPAFNVINGGSHAGNK	1	1	45	133	162	30	3010.56	0h
sp|P06733|ENOA_HUMAN	K.IDKLMIEMDGTENK.S	IDKLMIEMDGTENK	1	1	9	90	103	14	1635.78	0h
sp|P06733|ENOA_HUMAN	R.IGAEVYHNLK.N	IGAEVYHNLK	1	1	15	184	193	10	1142.61	0h
sp|P06733|ENOA_HUMAN	K.KLNVTEQEK.I	KLNVTEQEK	1	1	7	81	89	9	1087.59	0h
sp|P06733|ENOA_HUMAN	K.KLNVTEQEKIDK.L	KLNVTEQEKIDK	1	1	17	81	92	12	1443.79	0h
sp|P06733|ENOA_HUMAN	K.LAMQEFMILPVGAANFR.E	LAMQEFMILPVGAANFR	1	1	67	163	179	17	1906.98	0h
sp|P06733|ENOA_HUMAN	K.LAQANGWGVMVSHR.S	LAQANGWGVMVSHR	1	1	46	359	372	14	1524.76	0h
sp|P06733|ENOA_HUMAN	K.LMIEMDGTENK.S	LMIEMDGTENK	1	1	15	93	103	11	1279.58	0h
sp|P06733|ENOA_HUMAN	K.LNVTEQEKIDK.L	LNVTEQEKIDK	1	1	9	82	92	11	1315.7	0h
sp|P06733|ENOA_HUMAN	K.SFIKDYPVVSIEDPFDQDDWGAWQK.F	SFIKDYPVVSIEDPFDQDDWGAWQK	1	1	21	282	306	25	2984.38	0h
sp|P06733|ENOA_HUMAN	R.SGETEDTFIADLVVGLCTGQIK.T	SGETEDTFIADLVVGLCTGQIK	6	1	32	373	394	22	2295.13	0h
sp|P06733|ENOA_HUMAN	R.SGKYDLDFK.S	SGKYDLDFK	1	1	17	254	262	9	1071.52	0h
sp|P06733|ENOA_HUMAN	R.SGKYDLDFKSPDDPSR.Y	SGKYDLDFKSPDDPSR	1	1	9	254	269	16	1825.85	0h
sp|P06733|ENOA_HUMAN	K.VVIGMDVAASEFFR.S	VVIGMDVAASEFFR	1	1	694	240	253	14	1539.77	0h
sp|P06733|ENOA_HUMAN	R.YISPDQLADLYK.S	YISPDQLADLYK	1	1	9	270	281	12	1424.72	0h
sp|P06737|PYGL_HUMAN	R.MSLIEEEGSKR.I	MSLIEEEGSKR	2	0.9929	2	429	439	11	1277.63	0h
sp|P06737|PYGL_HUMAN	R.HLHFTLVK.D	HLHFTLVK	7	0.9946	4	35	42	8	993.574	0h
sp|P06737|PYGL_HUMAN	K.DIINMLFYHDR.F	DIINMLFYHDR	2	0.9965	3	761	771	11	1435.69	0h
sp|P06737|PYGL_HUMAN	K.EYAQNIWNVEPSDLK.I	EYAQNIWNVEPSDLK	1	0.997	1	820	834	15	1804.86	0h
sp|P06737|PYGL_HUMAN	X.SRPEFMLPVHFYGK.X	SRPEFMLPVHFYGK	3	0.9985	2	193	206	14	1706.86	0h
sp|P06737|PYGL_HUMAN	X.IFVDIEKLPWSK.X	IFVDIEKLPWSK	2	0.9991	3	353	364	12	1473.82	0h
sp|P06737|PYGL_HUMAN	R.DFNVGDYIQAVLDR.N	DFNVGDYIQAVLDR	3	1	8	257	270	14	1623.79	0h
sp|P06737|PYGL_HUMAN	X.GAGTVFDAFPDQVAIQLNDTHPALAIPELMR.X	GAGTVFDAFPDQVAIQLNDTHPALAIPELMR	2	1	1	322	352	31	3306.67	0h
sp|P06737|PYGL_HUMAN	K.LITSVADVVNNDPMVGSK.L	LITSVADVVNNDPMVGSK	2	1	3	623	640	18	1857.95	0h
sp|P06737|PYGL_HUMAN	R.VLYPNDNFFEGK.E	VLYPNDNFFEGK	6	1	10	279	290	12	1441.68	0h
sp|P06744|G6PI_HUMAN	R.VDHQTGPIVWGEPGTNGQHAFYQLIHQGTK.M	VDHQTGPIVWGEPGTNGQHAFYQLIHQGTK	3	0.9787	11	371	400	30	3314.62	0h
sp|P06744|G6PI_HUMAN	K.EWFLQAAK.D	EWFLQAAK	3	0.9999	9	227	234	8	991.511	0h
sp|P06744|G6PI_HUMAN	R.AVLHVALR.N	AVLHVALR	3	1	10	97	104	8	877.548	0h
sp|P06744|G6PI_HUMAN	R.FAAYFQQGDMESNGK.Y	FAAYFQQGDMESNGK	3	1	13	348	362	15	1691.72	0h
sp|P06744|G6PI_HUMAN	K.HFVALSTNTTK.V	HFVALSTNTTK	3	1	11	242	252	11	1217.64	0h
sp|P06744|G6PI_HUMAN	K.ILLANFLAQTEALMR.G	ILLANFLAQTEALMR	3	1	55	424	438	15	1702.94	0h
sp|P06744|G6PI_HUMAN	K.KIEPELDGSAQVTSHDASTNGLINFIK.Q	KIEPELDGSAQVTSHDASTNGLINFIK	3	1	19	524	550	27	2883.46	0h
sp|P06744|G6PI_HUMAN	X.LTPFMLGALVAMYEHK.X	LTPFMLGALVAMYEHK	3	1	3	482	497	16	1819.93	0h
sp|P06744|G6PI_HUMAN	K.TFTTQETITNAETAK.E	TFTTQETITNAETAK	3	1	15	212	226	15	1654.81	0h
sp|P06744|G6PI_HUMAN	K.TLAQLNPESSLFIIASK.T	TLAQLNPESSLFIIASK	3	1	15	195	211	17	1831.01	0h
sp|P06744|G6PI_HUMAN	K.VFEGNRPTNSIVFTK.L	VFEGNRPTNSIVFTK	3	1	8	467	481	15	1707.89	0h
sp|P06744|G6PI_HUMAN	R.VWYVSNIDGTHIAK.T	VWYVSNIDGTHIAK	3	1	13	181	194	14	1601.82	0h
sp|P06748|NPM_HUMAN	K.ADKDYHFKVDNDENEHQLSLR.T	ADKDYHFKVDNDENEHQLSLR	2	1	8	25	45	21	2572.19	0h
sp|P06748|NPM_HUMAN	K.DELHIVEAEAMNYEGSPIK.V	DELHIVEAEAMNYEGSPIK	2	1	25	55	73	19	2144.01	0h
sp|P06748|NPM_HUMAN	K.GPSSVEDIK.A	GPSSVEDIK	2	1	18	240	248	9	930.464	0h
sp|P06748|NPM_HUMAN	K.LAADEDDDDDDEEDDDEDDDDDDFDDEEAEEKAPVK.K	LAADEDDDDDDEEDDDEDDDDDDFDDEEAEEKAPVK	2	1	3	158	193	36	4117.45	0h
sp|P06748|NPM_HUMAN	K.LAADEDDDDDDEEDDDEDDDDDDFDDEEAEEKAPVKK.S	LAADEDDDDDDEEDDDEDDDDDDFDDEEAEEKAPVKK	2	1	14	158	194	37	4245.54	0h
sp|P06748|NPM_HUMAN	K.MSVQPTVSLGGFEITPPVVLR.L	MSVQPTVSLGGFEITPPVVLR	3	1	42	81	101	21	2226.21	0h
sp|P06748|NPM_HUMAN	R.MTDQEAIQDLWQWR.K	MTDQEAIQDLWQWR	1	1	42	278	291	14	1818.84	0h
sp|P06748|NPM_HUMAN	R.TVSLGAGAKDELHIVEAEAMNYEGSPIK.V	TVSLGAGAKDELHIVEAEAMNYEGSPIK	2	1	36	46	73	28	2928.45	0h
sp|P06748|NPM_HUMAN	K.VDNDENEHQLSLR.T	VDNDENEHQLSLR	3	1	29	33	45	13	1567.72	0h
sp|P06753|TPM3_HUMAN	X.IQLVEEELDRAQER.X	IQLVEEELDRAQER	21	1	8	92	105	14	1726.89	0h
sp|P06865|HEXA_HUMAN	X.IQPDTIIQVWR.X	IQPDTIIQVWR	3	0.9983	11	383	393	11	1367.76	0h
sp|P06865|HEXA_HUMAN	R.HYLPLSSILDTLDVMAYNK.L	HYLPLSSILDTLDVMAYNK	2	1	11	179	197	19	2192.12	0h
sp|P07108|ACBP_HUMAN	X.WDAWNELK.X	WDAWNELK	2	0.9989	5	56	63	8	1060.5	0h
sp|P07108|ACBP_HUMAN	K.AKWDAWNELK.G	AKWDAWNELK	2	1	2	54	63	10	1259.63	0h
sp|P07108|ACBP_HUMAN	X.AYINKVEELK.X	AYINKVEELK	2	1	6	73	82	10	1205.66	0h
sp|P07108|ACBP_HUMAN	K.QATVGDINTERPGMLDFTGK.A	QATVGDINTERPGMLDFTGK	2	1	38	34	53	20	2149.05	0h
sp|P07195|LDHB_HUMAN	R.IHPVSTMVK.G	IHPVSTMVK	2	0.9983	18	271	279	9	1010.56	0h
sp|P07195|LDHB_HUMAN	K.FIIPQIVK.Y	FIIPQIVK	4	0.9992	15	120	127	8	956.604	0h
sp|P07195|LDHB_HUMAN	K.GEMMDLQHGSLFLQTPK.I	GEMMDLQHGSLFLQTPK	4	1	21	61	77	17	1930.93	0h
sp|P07195|LDHB_HUMAN	R.GLTSVINQK.L	GLTSVINQK	2	1	9	300	308	9	958.543	0h
sp|P07195|LDHB_HUMAN	K.GYTNWAIGLSVADLIESMLK.N	GYTNWAIGLSVADLIESMLK	2	1	23	247	266	20	2180.11	0h
sp|P07195|LDHB_HUMAN	K.IVADKDYSVTANSK.I	IVADKDYSVTANSK	4	1	15	78	91	14	1509.76	0h
sp|P07195|LDHB_HUMAN	K.IVVVTAGVR.Q	IVVVTAGVR	4	1	9	92	100	9	912.573	0h
sp|P07195|LDHB_HUMAN	K.LIAPVAEEEATVPNNK.I	LIAPVAEEEATVPNNK	4	1	9	8	23	16	1693.89	0h
sp|P07195|LDHB_HUMAN	K.LKDDEVAQLK.K	LKDDEVAQLK	2	1	8	309	318	10	1157.63	0h
sp|P07195|LDHB_HUMAN	K.LKDDEVAQLKK.S	LKDDEVAQLKK	2	1	16	309	319	11	1285.72	0h
sp|P07195|LDHB_HUMAN	K.LKGEMMDLQHGSLFLQTPK.I	LKGEMMDLQHGSLFLQTPK	4	1	13	59	77	19	2172.1	0h
sp|P07195|LDHB_HUMAN	K.MVVESAYEVIK.L	MVVESAYEVIK	2	1	15	234	244	11	1266.65	0h
sp|P07195|LDHB_HUMAN	K.SADTLWDIQK.D	SADTLWDIQK	2	1	9	320	329	10	1175.58	0h
sp|P07195|LDHB_HUMAN	K.SLADELALVDVLEDK.L	SLADELALVDVLEDK	4	1	22	44	58	15	1628.85	0h
sp|P07195|LDHB_HUMAN	K.SLADELALVDVLEDKLK.G	SLADELALVDVLEDKLK	4	1	14	44	60	17	1870.03	0h
sp|P07237|PDIA1_HUMAN	K.QLAPIWDK.L	QLAPIWDK	2	0.978	3	402	409	8	969.527	0h
sp|P07237|PDIA1_HUMAN	X.LKAEGSEIR.X	LKAEGSEIR	3	0.9889	9	70	78	9	1001.55	0h
sp|P07237|PDIA1_HUMAN	K.KEECPAVR.L	KEECPAVR	2	0.9954	1	309	316	8	930.458	0h
sp|P07237|PDIA1_HUMAN	X.IKPHLMSQELPEDWDK.X	IKPHLMSQELPEDWDK	2	0.9963	1	351	366	16	1964.96	0h
sp|P07237|PDIA1_HUMAN	K.NFEDVAFDEK.K	NFEDVAFDEK	2	0.9991	1	376	385	10	1212.53	0h
sp|P07237|PDIA1_HUMAN	K.ENLLDFIK.H	ENLLDFIK	2	0.9992	13	223	230	8	990.537	0h
sp|P07237|PDIA1_HUMAN	X.NFEDVAFDEKK.X	NFEDVAFDEKK	2	0.9998	3	376	386	11	1340.62	0h
sp|P07237|PDIA1_HUMAN	K.DHENIVIAK.M	DHENIVIAK	2	1	9	416	424	9	1037.55	0h
sp|P07237|PDIA1_HUMAN	R.EADDIVNWLK.K	EADDIVNWLK	1	1	16	121	130	10	1201.6	0h
sp|P07237|PDIA1_HUMAN	K.FLESGGQDGAGDDDDLEDLEEAEEPDMEEDDDQK.A	FLESGGQDGAGDDDDLEDLEEAEEPDMEEDDDQK	2	1	16	469	502	34	3756.44	0h
sp|P07237|PDIA1_HUMAN	K.FLESGGQDGAGDDDDLEDLEEAEEPDMEEDDDQKAVKDEL.-	FLESGGQDGAGDDDDLEDLEEAEEPDMEEDDDQKAVKDEL	2	1	12	469	508	40	4411.79	0h
sp|P07237|PDIA1_HUMAN	K.HNQLPLVIEFTEQTAPK.I	HNQLPLVIEFTEQTAPK	2	1	23	231	247	17	1964.04	0h
sp|P07237|PDIA1_HUMAN	K.IKPHLMSQELPEDWDKQPVK.V	IKPHLMSQELPEDWDKQPVK	2	1	49	351	370	20	2417.24	0h
sp|P07237|PDIA1_HUMAN	R.ILEFFGLK.K	ILEFFGLK	2	1	36	301	308	8	965.556	0h
sp|P07237|PDIA1_HUMAN	X.ILEFFGLKK.X	ILEFFGLKK	2	1	17	301	309	9	1093.65	0h
sp|P07237|PDIA1_HUMAN	K.ILFIFIDSDHTDNQR.I	ILFIFIDSDHTDNQR	2	1	40	286	300	15	1832.9	0h
sp|P07237|PDIA1_HUMAN	R.KSNFAEALAAHK.Y	KSNFAEALAAHK	3	1	7	31	42	12	1285.67	0h
sp|P07237|PDIA1_HUMAN	K.LGETYKDHENIVIAK.M	LGETYKDHENIVIAK	2	1	33	410	424	15	1728.9	0h
sp|P07237|PDIA1_HUMAN	R.LITLEEEMTK.Y	LITLEEEMTK	2	1	21	317	326	10	1205.62	0h
sp|P07237|PDIA1_HUMAN	K.MDSTANEVEAVK.V	MDSTANEVEAVK	2	1	21	425	436	12	1292.59	0h
sp|P07237|PDIA1_HUMAN	R.NNFEGEVTKENLLDFIK.H	NNFEGEVTKENLLDFIK	2	1	12	214	230	17	2009.01	0h
sp|P07237|PDIA1_HUMAN	K.QFLQAAEAIDDIPFGITSNSDVFSK.Y	QFLQAAEAIDDIPFGITSNSDVFSK	2	1	51	171	195	25	2712.33	0h
sp|P07237|PDIA1_HUMAN	K.RTGPAATTLPDGAAAESLVESSEVAVIGFFK.D	RTGPAATTLPDGAAAESLVESSEVAVIGFFK	1	1	3	132	162	31	3090.58	0h
sp|P07237|PDIA1_HUMAN	K.SNFAEALAAHK.Y	SNFAEALAAHK	3	1	10	32	42	11	1157.58	0h
sp|P07237|PDIA1_HUMAN	K.SVSDYDGK.L	SVSDYDGK	2	1	2	264	271	8	869.374	0h
sp|P07237|PDIA1_HUMAN	R.TGPAATTLPDGAAAESLVESSEVAVIGFFK.D	TGPAATTLPDGAAAESLVESSEVAVIGFFK	1	1	347	133	162	30	2934.48	0h
sp|P07237|PDIA1_HUMAN	R.TGPAATTLPDGAAAESLVESSEVAVIGFFKDVESDSAK.Q	TGPAATTLPDGAAAESLVESSEVAVIGFFKDVESDSAK	1	1	21	133	170	38	3765.84	0h
sp|P07237|PDIA1_HUMAN	K.THILLFLPK.S	THILLFLPK	2	1	25	255	263	9	1080.67	0h
sp|P07237|PDIA1_HUMAN	R.TVIDYNGER.T	TVIDYNGER	2	1	4	453	461	9	1065.51	0h
sp|P07237|PDIA1_HUMAN	K.VDATEESDLAQQYGVR.G	VDATEESDLAQQYGVR	3	1	20	82	97	16	1779.83	0h
sp|P07237|PDIA1_HUMAN	K.VHSFPTLK.F	VHSFPTLK	2	1	12	437	444	8	927.516	0h
sp|P07237|PDIA1_HUMAN	K.YKPESEELTAER.I	YKPESEELTAER	2	1	19	327	338	12	1450.69	0h
sp|P07237|PDIA1_HUMAN	K.YQLDKDGVVLFK.K	YQLDKDGVVLFK	2	1	24	196	207	12	1423.77	0h
sp|P07237|PDIA1_HUMAN	K.YQLDKDGVVLFKK.F	YQLDKDGVVLFKK	2	1	1	196	208	13	1551.86	0h
sp|P07339|CATD_HUMAN	R.DPDAQPGGELMLGGTDSK.Y	DPDAQPGGELMLGGTDSK	2	1	2	236	253	18	1786.8	0h
sp|P07339|CATD_HUMAN	R.ISVNNVLPVFDNLMQQK.L	ISVNNVLPVFDNLMQQK	3	1	8	206	222	17	1958.03	0h
sp|P07339|CATD_HUMAN	K.LVDQNIFSFYLSR.D	LVDQNIFSFYLSR	2	1	12	223	235	13	1600.82	0h
sp|P07384|CAN1_HUMAN	R.KAPSDLYQIILK.A	KAPSDLYQIILK	3	0.9649	1	229	240	12	1387.81	0h
sp|P07384|CAN1_HUMAN	K.YLGQDYEQLR.V	YLGQDYEQLR	11	0.9999	3	37	46	10	1283.61	0h
sp|P07384|CAN1_HUMAN	X.DMETIGFAVYEVPPELVGQPAVHLK.X	DMETIGFAVYEVPPELVGQPAVHLK	2	1	1	437	461	25	2738.4	0h
sp|P07384|CAN1_HUMAN	R.NYPATFWVNPQFK.I	NYPATFWVNPQFK	2	1	13	386	398	13	1610.79	0h
sp|P07437|TBB5_HUMAN	K.NMMAACDPR.H	NMMAACDPR	19	0.9893	4	298	306	9	1007.4	0h
sp|P07437|TBB5_HUMAN	R.AILVDLEPGTMDSVR.S	AILVDLEPGTMDSVR	7	1	23	63	77	15	1614.83	0h
sp|P07437|TBB5_HUMAN	R.ALTVPELTQQVFDAK.N	ALTVPELTQQVFDAK	6	1	41	283	297	15	1658.89	0h
sp|P07437|TBB5_HUMAN	X.EIVHIQAGQCGNQIGAK.X	EIVHIQAGQCGNQIGAK	8	1	18	3	19	17	1764.89	0h
sp|P07437|TBB5_HUMAN	K.EVDEQMLNVQNK.N	EVDEQMLNVQNK	9	1	2	325	336	12	1445.68	0h
sp|P07437|TBB5_HUMAN	R.FPGQLNADLR.K	FPGQLNADLR	21	1	31	242	251	10	1129.59	0h
sp|P07437|TBB5_HUMAN	R.FPGQLNADLRK.L	FPGQLNADLRK	21	1	26	242	252	11	1257.68	0h
sp|P07437|TBB5_HUMAN	X.FWEVISDEHGIDPTGTYHGDSDLQLDR.X	FWEVISDEHGIDPTGTYHGDSDLQLDR	5	1	15	20	46	27	3101.4	0h
sp|P07437|TBB5_HUMAN	K.GHYTEGAELVDSVLDVVR.K	GHYTEGAELVDSVLDVVR	9	1	47	104	121	18	1957.97	0h
sp|P07437|TBB5_HUMAN	K.GHYTEGAELVDSVLDVVRK.E	GHYTEGAELVDSVLDVVRK	9	1	19	104	122	19	2086.07	0h
sp|P07437|TBB5_HUMAN	R.IMNTFSVVPSPK.V	IMNTFSVVPSPK	7	1	16	163	174	12	1318.69	0h
sp|P07437|TBB5_HUMAN	R.ISVYYNEATGGK.Y	ISVYYNEATGGK	5	1	15	47	58	12	1300.63	0h
sp|P07437|TBB5_HUMAN	K.LAVNMVPFPR.L	LAVNMVPFPR	22	1	10	253	262	10	1142.62	0h
sp|P07437|TBB5_HUMAN	K.MAVTFIGNSTAIQELFK.R	MAVTFIGNSTAIQELFK	7	1	116	363	379	17	1868.97	0h
sp|P07437|TBB5_HUMAN	K.RISEQFTAMFR.R	RISEQFTAMFR	14	1	13	380	390	11	1384.69	0h
sp|P07437|TBB5_HUMAN	R.YLTVAAVFR.G	YLTVAAVFR	10	1	17	310	318	9	1038.58	0h
sp|P07602|SAP_HUMAN	K.QEILAALEK.G	QEILAALEK	7	0.9883	2	430	438	9	1013.58	0h
sp|P07602|SAP_HUMAN	K.EILDAFDK.M	EILDAFDK	6	0.9988	1	337	344	8	949.474	0h
sp|P07602|SAP_HUMAN	K.EIVDSYLPVILDIIK.G	EIVDSYLPVILDIIK	6	1	26	108	122	15	1728.99	0h
sp|P07602|SAP_HUMAN	K.NYISQYSEIAIQMMMHMQPK.E	NYISQYSEIAIQMMMHMQPK	3	1	15	243	262	20	2442.12	0h
sp|P07737|PROF1_HUMAN	R.SSFYVNGLTLGGQK.C	SSFYVNGLTLGGQK	2	0.9985	8	57	70	14	1469.75	0h
sp|P07737|PROF1_HUMAN	R.DSLLQDGEFSMDLR.T	DSLLQDGEFSMDLR	2	1	120	76	89	14	1624.74	0h
sp|P07737|PROF1_HUMAN	K.DSPSVWAAVPGK.T	DSPSVWAAVPGK	2	1	6	27	38	12	1212.61	0h
sp|P07737|PROF1_HUMAN	K.STGGAPTFNVTVTK.T	STGGAPTFNVTVTK	2	1	11	92	105	14	1378.71	0h
sp|P07737|PROF1_HUMAN	K.TDKTLVLLMGK.E	TDKTLVLLMGK	2	1	6	106	116	11	1217.7	0h
sp|P07737|PROF1_HUMAN	K.TFVNITPAEVGVLVGK.D	TFVNITPAEVGVLVGK	2	1	31	39	54	16	1642.93	0h
sp|P07737|PROF1_HUMAN	K.TLVLLMGK.E	TLVLLMGK	2	1	14	109	116	8	873.533	0h
sp|P07741|APT_HUMAN	R.SFPDFPTPGVVFR.D	SFPDFPTPGVVFR	1	0.9897	5	15	27	13	1464.74	0h
sp|P07814|SYEP_HUMAN	K.NLQMWEEMKK.G	NLQMWEEMKK	2	0.9016	1	319	328	10	1335.63	0h
sp|P07814|SYEP_HUMAN	K.TKVEATKNETSAPFK.E	TKVEATKNETSAPFK	2	0.9042	1	719	733	15	1649.86	0h
sp|P07814|SYEP_HUMAN	K.VIDPVAPR.Y	VIDPVAPR	2	0.9958	1	499	506	8	865.501	0h
sp|P07814|SYEP_HUMAN	K.FVELPGAEMGK.V	FVELPGAEMGK	2	0.9961	2	187	197	11	1176.58	0h
sp|P07814|SYEP_HUMAN	R.NSEPAGLETPEAK.V	NSEPAGLETPEAK	2	0.9974	5	890	902	13	1341.64	0h
sp|P07814|SYEP_HUMAN	K.SLIGVEYKPVSATGAEDKDKK.K	SLIGVEYKPVSATGAEDKDKK	1	0.9983	1	944	964	21	2234.17	0h
sp|P07814|SYEP_HUMAN	K.GNAAWQEQLK.Q	GNAAWQEQLK	2	0.9984	2	130	139	10	1143.57	0h
sp|P07814|SYEP_HUMAN	K.MFEIVFEDPKIPGEK.Q	MFEIVFEDPKIPGEK	1	0.9985	4	1251	1265	15	1777.89	0h
sp|P07814|SYEP_HUMAN	R.VAVQGDVVR.E	VAVQGDVVR	2	0.9999	1	757	765	9	941.527	0h
sp|P07814|SYEP_HUMAN	X.AIQGGTSHHLGQNFSK.X	AIQGGTSHHLGQNFSK	1	1	14	1235	1250	16	1680.83	0h
sp|P07814|SYEP_HUMAN	K.AYVDDTPAEQMK.A	AYVDDTPAEQMK	2	1	13	289	300	12	1366.61	0h
sp|P07814|SYEP_HUMAN	R.DQDLEPGAPSMGAK.S	DQDLEPGAPSMGAK	1	1	7	1464	1477	14	1414.64	0h
sp|P07814|SYEP_HUMAN	K.EVIPVNVPEAQEEMK.E	EVIPVNVPEAQEEMK	2	1	2	514	528	15	1710.85	0h
sp|P07814|SYEP_HUMAN	K.FAGGDYTTTIEAFISASGR.A	FAGGDYTTTIEAFISASGR	1	1	10	1216	1234	19	1962.93	0h
sp|P07814|SYEP_HUMAN	K.KEENLADWYSQVITK.S	KEENLADWYSQVITK	1	1	2	1020	1034	15	1822.91	0h
sp|P07814|SYEP_HUMAN	K.KGDIIQLQR.R	KGDIIQLQR	2	1	8	666	674	9	1069.62	0h
sp|P07814|SYEP_HUMAN	K.LQAILEDIQVTLFTR.A	LQAILEDIQVTLFTR	1	1	4	1401	1415	15	1758.99	0h
sp|P07814|SYEP_HUMAN	K.LTVAENEAETK.L	LTVAENEAETK	1	1	11	1390	1400	11	1203.6	0h
sp|P07814|SYEP_HUMAN	K.MFEIVFEDPK.I	MFEIVFEDPK	1	1	8	1251	1260	10	1253.6	0h
sp|P07814|SYEP_HUMAN	K.NPEVGLKPVWYSPK.V	NPEVGLKPVWYSPK	2	1	14	536	549	14	1612.86	0h
sp|P07814|SYEP_HUMAN	K.NQGGGLSSSGAGEGQGPK.K	NQGGGLSSSGAGEGQGPK	1	1	5	992	1009	18	1586.72	0h
sp|P07814|SYEP_HUMAN	X.TELAEPIAIRPTSETVMYPAYAK.X	TELAEPIAIRPTSETVMYPAYAK	1	1	6	1110	1132	23	2550.3	0h
sp|P07814|SYEP_HUMAN	K.TGQEYKPGNPPAEIGQNISSNSSASILESK.S	TGQEYKPGNPPAEIGQNISSNSSASILESK	2	1	1	795	824	30	3102.51	0h
sp|P07814|SYEP_HUMAN	K.THVADFAPEVAWVTR.S	THVADFAPEVAWVTR	1	1	4	1092	1106	15	1697.85	0h
sp|P07900|HS90A_HUMAN	K.IRYESLTDPSK.L	IRYESLTDPSK	7	0.9893	1	59	69	11	1307.67	0h
sp|P07900|HS90A_HUMAN	X.KHSQFIGYPITLFVEK.X	KHSQFIGYPITLFVEK	2	0.993	1	209	224	16	1906.03	0h
sp|P07900|HS90A_HUMAN	X.LGIHEDSQNRK.X	LGIHEDSQNRK	1	0.9957	3	447	457	11	1295.66	0h
sp|P07900|HS90A_HUMAN	K.IMKDILEK.K	IMKDILEK	1	0.9991	5	574	581	8	988.56	0h
sp|P07900|HS90A_HUMAN	R.YESLTDPSK.L	YESLTDPSK	7	0.9992	4	61	69	9	1038.49	0h
sp|P07900|HS90A_HUMAN	K.ADLINNLGTIAK.S	ADLINNLGTIAK	5	1	14	101	112	12	1241.7	0h
sp|P07900|HS90A_HUMAN	R.APFDLFENR.K	APFDLFENR	1	1	11	347	355	9	1107.53	0h
sp|P07900|HS90A_HUMAN	K.DQVANSAFVER.L	DQVANSAFVER	1	1	13	500	510	11	1234.59	0h
sp|P07900|HS90A_HUMAN	K.EDQTEYLEER.R	EDQTEYLEER	5	1	15	192	201	10	1310.56	0h
sp|P07900|HS90A_HUMAN	K.EGLELPEDEEEK.K	EGLELPEDEEEK	5	1	8	547	558	12	1415.63	0h
sp|P07900|HS90A_HUMAN	K.EGLELPEDEEEKK.K	EGLELPEDEEEKK	5	1	15	547	559	13	1543.72	0h
sp|P07900|HS90A_HUMAN	K.EGLELPEDEEEKKK.Q	EGLELPEDEEEKKK	4	1	15	547	560	14	1671.82	0h
sp|P07900|HS90A_HUMAN	K.EKYIDQEELNK.T	EKYIDQEELNK	4	1	11	282	292	11	1407.69	0h
sp|P07900|HS90A_HUMAN	K.ELHINLIPNKQDR.T	ELHINLIPNKQDR	2	1	7	75	87	13	1588.87	0h
sp|P07900|HS90A_HUMAN	R.ELISNSSDALDK.I	ELISNSSDALDK	3	1	7	47	58	12	1290.63	0h
sp|P07900|HS90A_HUMAN	R.ELISNSSDALDKIR.Y	ELISNSSDALDKIR	2	1	18	47	60	14	1559.81	0h
sp|P07900|HS90A_HUMAN	K.HFSVEGQLEFR.A	HFSVEGQLEFR	5	1	9	328	338	11	1347.66	0h
sp|P07900|HS90A_HUMAN	X.HGLEVIYMIEPIDEYCVQQLK.X	HGLEVIYMIEPIDEYCVQQLK	1	1	3	514	534	21	2519.24	0h
sp|P07900|HS90A_HUMAN	K.HIYYITGETK.D	HIYYITGETK	2	1	13	490	499	10	1223.62	0h
sp|P07900|HS90A_HUMAN	K.HLEINPDHSIIETLR.Q	HLEINPDHSIIETLR	1	1	30	633	647	15	1785.94	0h
sp|P07900|HS90A_HUMAN	K.HSQFIGYPITLFVEK.E	HSQFIGYPITLFVEK	2	1	19	210	224	15	1777.94	0h
sp|P07900|HS90A_HUMAN	K.KHLEINPDHSIIETLR.Q	KHLEINPDHSIIETLR	1	1	19	632	647	16	1914.03	0h
sp|P07900|HS90A_HUMAN	K.LGIHEDSQNR.K	LGIHEDSQNR	1	1	3	447	456	10	1167.56	0h
sp|P07900|HS90A_HUMAN	K.LGLGIDEDDPTADDTSAAVTEEMPPLEGDDDTSR.M	LGLGIDEDDPTADDTSAAVTEEMPPLEGDDDTSR	1	1	8	694	727	34	3546.53	0h
sp|P07900|HS90A_HUMAN	R.NPDDITNEEYGEFYK.S	NPDDITNEEYGEFYK	1	1	15	300	314	15	1832.77	0h
sp|P07900|HS90A_HUMAN	R.RAPFDLFENR.K	RAPFDLFENR	1	1	20	346	355	10	1263.63	0h
sp|P07900|HS90A_HUMAN	K.SLTNDWEDHLAVK.H	SLTNDWEDHLAVK	2	1	10	315	327	13	1526.73	0h
sp|P07900|HS90A_HUMAN	X.TLTIVDTGIGMTK.X	TLTIVDTGIGMTK	3	1	18	88	100	13	1348.72	0h
sp|P07900|HS90A_HUMAN	R.VFIMDNCEELIPEYLNFIR.G	VFIMDNCEELIPEYLNFIR	1	1	20	368	386	19	2357.14	0h
sp|P07900|HS90A_HUMAN	K.VILHLKEDQTEYLEER.R	VILHLKEDQTEYLEER	5	1	10	186	201	16	2014.04	0h
sp|P07900|HS90A_HUMAN	R.YESLTDPSKLDSGK.E	YESLTDPSKLDSGK	6	1	16	61	74	14	1538.74	0h
sp|P07900|HS90A_HUMAN	K.YIDQEELNK.T	YIDQEELNK	4	1	6	284	292	9	1150.55	0h
sp|P07900|HS90A_HUMAN	R.YYTSASGDEMVSLK.D	YYTSASGDEMVSLK	1	1	8	465	478	14	1549.69	0h
sp|P07910|HNRPC_HUMAN	K.LKGDDLQAIKK.E	LKGDDLQAIKK	1	0.9989	13	188	198	11	1227.71	0h
sp|P07910|HNRPC_HUMAN	R.VPPPPPIAR.A	VPPPPPIAR	1	0.9989	10	143	151	9	942.565	0h
sp|P07910|HNRPC_HUMAN	K.NDKSEEEQSSSSVK.K	NDKSEEEQSSSSVK	1	0.9992	7	230	243	14	1552.68	0h
sp|P07910|HNRPC_HUMAN	K.KSDVEAIFSK.Y	KSDVEAIFSK	4	1	1	30	39	10	1122.59	0h
sp|P07910|HNRPC_HUMAN	R.MIAGQVLDINLAAEPK.V	MIAGQVLDINLAAEPK	2	1	8	74	89	16	1681.9	0h
sp|P07910|HNRPC_HUMAN	K.QKVDSLLENLEK.I	QKVDSLLENLEK	2	1	7	205	216	12	1414.77	0h
sp|P07910|HNRPC_HUMAN	K.VDSLLENLEK.I	VDSLLENLEK	2	1	6	207	216	10	1158.61	0h
sp|P07910|HNRPC_HUMAN	R.VFIGNLNTLVVK.K	VFIGNLNTLVVK	4	1	15	18	29	12	1315.78	0h
sp|P07954|FUMH_HUMAN	R.IEYDTFGELK.V	IEYDTFGELK	2	0.97	1	52	61	10	1213.59	0h
sp|P07954|FUMH_HUMAN	R.AAAEVNQDYGLDPK.I	AAAEVNQDYGLDPK	2	1	15	102	115	14	1489.7	0h
sp|P07954|FUMH_HUMAN	K.IPVHPNDHVNK.S	IPVHPNDHVNK	2	1	4	173	183	11	1268.66	0h
sp|P07954|FUMH_HUMAN	K.LMNESLMLVTALNPHIGYDK.A	LMNESLMLVTALNPHIGYDK	2	1	14	448	467	20	2258.14	0h
sp|P07954|FUMH_HUMAN	K.LNDHFPLVVWQTGSGTQTNMNVNEVISNR.A	LNDHFPLVVWQTGSGTQTNMNVNEVISNR	2	1	5	132	160	29	3269.59	0h
sp|P08107|HSP71_HUMAN	X.VEIIANDQGNR.X	VEIIANDQGNR	22	0.9889	10	26	36	11	1227.62	0h
sp|P08107|HSP71_HUMAN	X.ITITNDKGR.X	ITITNDKGR	14	0.9892	2	501	509	9	1016.56	0h
sp|P08107|HSP71_HUMAN	K.ATAGDTHLGGEDFDNR.L	ATAGDTHLGGEDFDNR	11	0.9968	1	221	236	16	1674.72	0h
sp|P08107|HSP71_HUMAN	R.IINEPTAAAIAYGLDR.T	IINEPTAAAIAYGLDR	6	1	11	172	187	16	1686.89	0h
sp|P08107|HSP71_HUMAN	K.NQVALNPQNTVFDAK.R	NQVALNPQNTVFDAK	3	1	5	57	71	15	1657.84	0h
sp|P08133|ANXA6_HUMAN	X.SELDMLDIR.X	SELDMLDIR	3	0.9586	1	282	290	9	1090.53	0h
sp|P08133|ANXA6_HUMAN	X.NKPLFFADK.X	NKPLFFADK	5	0.9877	1	599	607	9	1078.58	0h
sp|P08133|ANXA6_HUMAN	R.LILGLMMPPAHYDAK.Q	LILGLMMPPAHYDAK	5	0.998	2	428	442	15	1668.87	0h
sp|P08133|ANXA6_HUMAN	X.ALIEILATR.X	ALIEILATR	5	0.9988	2	457	465	9	998.612	0h
sp|P08133|ANXA6_HUMAN	R.SEIDLLNIR.R	SEIDLLNIR	6	0.999	14	630	638	9	1071.59	0h
sp|P08133|ANXA6_HUMAN	R.EEGGENLDQAR.E	EEGGENLDQAR	5	0.9998	4	510	520	11	1216.53	0h
sp|P08133|ANXA6_HUMAN	R.DAFVAIVQSVK.N	DAFVAIVQSVK	5	1	3	588	598	11	1175.65	0h
sp|P08133|ANXA6_HUMAN	R.DLEADIIGDTSGHFQK.M	DLEADIIGDTSGHFQK	5	1	16	141	156	16	1744.83	0h
sp|P08133|ANXA6_HUMAN	X.DLMTDLKSEISGDLAR.X	DLMTDLKSEISGDLAR	5	1	4	412	427	16	1762.88	0h
sp|P08133|ANXA6_HUMAN	R.EDAQVAAEILEIADTPSGDK.T	EDAQVAAEILEIADTPSGDK	3	1	2	521	540	20	2070.99	0h
sp|P08133|ANXA6_HUMAN	X.EEDDVVSEDLVQQDVQDLYEAGELK.X	EEDDVVSEDLVQQDVQDLYEAGELK	3	1	1	167	191	25	2864.31	0h
sp|P08133|ANXA6_HUMAN	K.GFGSDKEAILDIITSR.S	GFGSDKEAILDIITSR	11	1	18	35	50	16	1720.9	0h
sp|P08133|ANXA6_HUMAN	X.GLGTDEDTIIDIITHR.X	GLGTDEDTIIDIITHR	4	1	15	378	393	16	1767.9	0h
sp|P08133|ANXA6_HUMAN	R.GSIHDFPGFDPNQDAEALYTAMK.G	GSIHDFPGFDPNQDAEALYTAMK	8	1	14	12	34	23	2523.14	0h
sp|P08133|ANXA6_HUMAN	K.MTNYDVEHTIKK.E	MTNYDVEHTIKK	5	1	2	569	580	12	1477.72	0h
sp|P08133|ANXA6_HUMAN	K.SLEDALSSDTSGHFR.R	SLEDALSSDTSGHFR	5	1	9	484	498	15	1620.74	0h
sp|P08133|ANXA6_HUMAN	K.SLHQAIEGDTSGDFLK.A	SLHQAIEGDTSGDFLK	6	1	5	648	663	16	1716.83	0h
sp|P08133|ANXA6_HUMAN	R.TNEQMHQLVAAYK.D	TNEQMHQLVAAYK	5	1	1	123	135	13	1531.74	0h
sp|P08133|ANXA6_HUMAN	K.WGTDEAQFIYILGNR.S	WGTDEAQFIYILGNR	3	1	4	192	206	15	1781.87	0h
sp|P08195|4F2_HUMAN	X.ADLLLSTQPGREEGSPLELER.X	ADLLLSTQPGREEGSPLELER	1	0.9482	2	593	613	21	2309.19	0h
sp|P08195|4F2_HUMAN	X.WWHTGALYR.X	WWHTGALYR	1	0.9814	6	218	226	9	1188.58	0h
sp|P08195|4F2_HUMAN	R.LLTSFLPAQLLR.L	LLTSFLPAQLLR	1	1	11	440	451	12	1370.83	0h
sp|P08195|4F2_HUMAN	K.VAEDEAEAAAAAK.F	VAEDEAEAAAAAK	2	1	5	148	160	13	1244.59	0h
sp|P08238|HS90B_HUMAN	R.RAPFDLFENKK.K	RAPFDLFENKK	2	0.9978	6	338	348	11	1363.72	0h
sp|P08238|HS90B_HUMAN	K.KHSQFIGYPITLYLEK.E	KHSQFIGYPITLYLEK	2	0.998	4	204	219	16	1936.04	0h
sp|P08238|HS90B_HUMAN	X.LGIHEDSTNRR.X	LGIHEDSTNRR	4	0.9989	2	439	449	11	1296.65	0h
sp|P08238|HS90B_HUMAN	R.RAPFDLFENK.K	RAPFDLFENK	2	0.999	17	338	347	10	1235.63	0h
sp|P08238|HS90B_HUMAN	X.ELISNASDALDKIR.X	ELISNASDALDKIR	3	0.9992	6	42	55	14	1543.82	0h
sp|P08238|HS90B_HUMAN	K.LGLGIDEDEVAAEEPNAAVPDEIPPLEGDEDASR.M	LGLGIDEDEVAAEEPNAAVPDEIPPLEGDEDASR	1	0.9993	14	686	719	34	3531.64	0h
sp|P08238|HS90B_HUMAN	K.AKFENLCK.L	AKFENLCK	2	0.9996	11	558	565	8	951.482	0h
sp|P08238|HS90B_HUMAN	K.IDIIPNPQER.T	IDIIPNPQER	2	0.9998	7	73	82	10	1193.64	0h
sp|P08238|HS90B_HUMAN	R.ADHGEPIGR.G	ADHGEPIGR	2	1	24	169	177	9	950.456	0h
sp|P08238|HS90B_HUMAN	R.APFDLFENK.K	APFDLFENK	2	1	4	339	347	9	1079.53	0h
sp|P08238|HS90B_HUMAN	R.DNSTMGYMMAK.K	DNSTMGYMMAK	2	1	9	613	623	11	1247.49	0h
sp|P08238|HS90B_HUMAN	R.ELISNASDALDK.I	ELISNASDALDK	3	1	8	42	53	12	1274.63	0h
sp|P08238|HS90B_HUMAN	K.EQVANSAFVER.V	EQVANSAFVER	3	1	3	492	502	11	1248.61	0h
sp|P08238|HS90B_HUMAN	R.GFEVVYMTEPIDEYCVQQLK.E	GFEVVYMTEPIDEYCVQQLK	1	1	3	507	526	20	2390.11	0h
sp|P08238|HS90B_HUMAN	K.HLEINPDHPIVETLR.Q	HLEINPDHPIVETLR	1	1	11	625	639	15	1781.94	0h
sp|P08238|HS90B_HUMAN	X.HSQFIGYPITLYLEK.X	HSQFIGYPITLYLEK	2	1	30	205	219	15	1807.95	0h
sp|P08238|HS90B_HUMAN	K.KHLEINPDHPIVETLR.Q	KHLEINPDHPIVETLR	1	1	27	624	639	16	1910.04	0h
sp|P08238|HS90B_HUMAN	K.LGIHEDSTNR.R	LGIHEDSTNR	4	1	16	439	448	10	1140.55	0h
sp|P08238|HS90B_HUMAN	R.NPDDITQEEYGEFYK.S	NPDDITQEEYGEFYK	1	1	6	292	306	15	1846.79	0h
sp|P08238|HS90B_HUMAN	K.SIYYITGESK.E	SIYYITGESK	4	1	4	482	491	10	1159.57	0h
sp|P08238|HS90B_HUMAN	R.VFIMDSCDELIPEYLNFIR.G	VFIMDSCDELIPEYLNFIR	1	1	5	360	378	19	2316.11	0h
sp|P08238|HS90B_HUMAN	R.YHTSQSGDEMTSLSEYVSR.M	YHTSQSGDEMTSLSEYVSR	4	1	28	457	475	19	2175.94	0h
sp|P08240|SRPR_HUMAN	-.MLDFFTIFSK.G	MLDFFTIFSK	2	0.9974	3	1	10	10	1247.62	0h
sp|P08240|SRPR_HUMAN	K.GTLGGMFGMLK.G	GTLGGMFGMLK	2	1	2	315	325	11	1110.55	0h
sp|P08240|SRPR_HUMAN	K.LITVNTPDLVLFVGEALVGNEAVDQLVK.F	LITVNTPDLVLFVGEALVGNEAVDQLVK	2	1	15	538	565	28	2965.63	0h
sp|P08240|SRPR_HUMAN	K.NVAADIAVQLCESVANKLEGK.V	NVAADIAVQLCESVANKLEGK	2	1	5	353	373	21	2171.12	0h
sp|P08243|ASNS_HUMAN	R.ELYLFDVLR.A	ELYLFDVLR	3	1	13	396	404	9	1166.63	0h
sp|P08311|CATG_HUMAN	R.VSSFLPWIR.T	VSSFLPWIR	1	1	11	231	239	9	1103.61	0h
sp|P08567|PLEK_HUMAN	X.EDPAYLHYYDPAGAEDPLGAIHLR.X	EDPAYLHYYDPAGAEDPLGAIHLR	1	1	1	270	293	24	2682.27	0h
sp|P08574|CY1_HUMAN	R.GLLSSLDHTSIR.R	GLLSSLDHTSIR	1	0.9997	3	100	111	12	1297.7	0h
sp|P08574|CY1_HUMAN	K.LFDYFPKPYPNSEAAR.A	LFDYFPKPYPNSEAAR	1	0.9998	8	171	186	16	1913.93	0h
sp|P08574|CY1_HUMAN	K.MLMMMALLVPLVYTIK.R	MLMMMALLVPLVYTIK	1	1	8	292	307	16	1866.02	0h
sp|P08574|CY1_HUMAN	R.WASEPEHDHR.K	WASEPEHDHR	1	1	9	276	285	10	1262.54	0h
sp|P08579|RU2B_HUMAN	K.TVEQTATTTNK.K	TVEQTATTTNK	1	0.9992	5	112	122	11	1192.59	0h
sp|P08579|RU2B_HUMAN	R.GQAFVIFK.E	GQAFVIFK	2	1	15	50	57	8	908.509	0h
sp|P08621|RU17_HUMAN	X.RQQEVETELK.X	RQQEVETELK	1	0.9018	2	78	87	10	1258.65	0h
sp|P08621|RU17_HUMAN	R.VNYDTTESK.L	VNYDTTESK	1	0.9039	1	110	118	9	1055.48	0h
sp|P08621|RU17_HUMAN	R.DPIPYLPPLEK.L	DPIPYLPPLEK	1	0.99	3	17	27	11	1280.7	0h
sp|P08621|RU17_HUMAN	R.EFEVYGPIKR.I	EFEVYGPIKR	1	0.9912	9	122	131	10	1236.65	0h
sp|P08621|RU17_HUMAN	R.GGGGGQDNGLEGLGNDSR.D	GGGGGQDNGLEGLGNDSR	1	1	11	394	411	18	1658.72	0h
sp|P08621|RU17_HUMAN	X.GYAFIEYEHER.X	GYAFIEYEHER	1	1	8	145	155	11	1412.63	0h
sp|P08621|RU17_HUMAN	K.MWDPHNDPNAQGDAFK.T	MWDPHNDPNAQGDAFK	1	1	11	88	103	16	1841.78	0h
sp|P08670|VIME_HUMAN	R.SLYASSPGGVYATR.S	SLYASSPGGVYATR	2	0.9901	2	51	64	14	1427.7	0h
sp|P08670|VIME_HUMAN	K.NLQEAEEWYK.S	NLQEAEEWYK	6	0.9963	9	283	292	10	1308.6	0h
sp|P08670|VIME_HUMAN	R.DGQVINETSQHHDDLE.-	DGQVINETSQHHDDLE	1	1	6	451	466	16	1835.79	0h
sp|P08670|VIME_HUMAN	R.EEAENTLQSFR.Q	EEAENTLQSFR	4	1	5	197	207	11	1322.61	0h
sp|P08670|VIME_HUMAN	R.ISLPLPNFSSLNLR.E	ISLPLPNFSSLNLR	2	1	9	411	424	14	1569.89	0h
sp|P08670|VIME_HUMAN	R.KVESLQEEIAFLK.K	KVESLQEEIAFLK	4	1	14	223	235	13	1532.84	0h
sp|P08670|VIME_HUMAN	R.LQDEIQNMKEEMAR.H	LQDEIQNMKEEMAR	3	1	6	365	378	14	1733.81	0h
sp|P08708|RS17_HUMAN	X.DNYVPEVSALDQEIIEVDPDTKEMLK.X	DNYVPEVSALDQEIIEVDPDTKEMLK	1	0.9857	2	82	107	26	2989.45	0h
sp|P08708|RS17_HUMAN	R.DNYVPEVSALDQEIIEVDPDTK.E	DNYVPEVSALDQEIIEVDPDTK	1	1	12	82	103	22	2488.18	0h
sp|P08708|RS17_HUMAN	X.IAGYVTHLMK.X	IAGYVTHLMK	1	1	4	50	59	10	1131.61	0h
sp|P08708|RS17_HUMAN	R.LGNDFHTNKR.V	LGNDFHTNKR	1	1	2	24	33	10	1200.6	0h
sp|P08708|RS17_HUMAN	K.LLDFGSLSNLQVTQPTVGMNFK.T	LLDFGSLSNLQVTQPTVGMNFK	1	1	25	108	129	22	2408.24	0h
sp|P08758|ANXA5_HUMAN	X.FITIFGTR.X	FITIFGTR	4	0.9882	5	194	201	8	953.532	0h
sp|P08758|ANXA5_HUMAN	X.WGTDEEKFITIFGTR.X	WGTDEEKFITIFGTR	4	0.9993	2	187	201	15	1798.89	0h
sp|P08758|ANXA5_HUMAN	K.VLTEIIASR.T	VLTEIIASR	4	0.9999	5	109	117	9	1000.59	0h
sp|P08758|ANXA5_HUMAN	R.DLLDDLKSELTGK.F	DLLDDLKSELTGK	3	1	16	64	76	13	1445.76	0h
sp|P08758|ANXA5_HUMAN	R.DLLDDLKSELTGKFEK.L	DLLDDLKSELTGKFEK	3	1	11	64	79	16	1849.96	0h
sp|P08758|ANXA5_HUMAN	R.ETSGNLEQLLLAVVK.S	ETSGNLEQLLLAVVK	4	1	15	228	242	15	1612.9	0h
sp|P08758|ANXA5_HUMAN	K.GAGTDDHTLIR.V	GAGTDDHTLIR	3	1	9	261	271	11	1154.57	0h
sp|P08758|ANXA5_HUMAN	K.GLGTDEESILTLLTSR.S	GLGTDEESILTLLTSR	3	1	15	30	45	16	1703.89	0h
sp|P08758|ANXA5_HUMAN	R.GTVTDFPGFDER.A	GTVTDFPGFDER	5	1	4	7	18	12	1339.6	0h
sp|P08758|ANXA5_HUMAN	R.MLVVLLQANRDPDAGIDEAQVEQDAQALFQAGELK.W	MLVVLLQANRDPDAGIDEAQVEQDAQALFQAGELK	4	1	11	152	186	35	3794.91	0h
sp|P08758|ANXA5_HUMAN	K.NFATSLYSMIK.G	NFATSLYSMIK	3	1	10	291	301	11	1273.63	0h
sp|P08758|ANXA5_HUMAN	R.SIPAYLAETLYYAMK.G	SIPAYLAETLYYAMK	3	1	15	246	260	15	1732.87	0h
sp|P08865|RSSA_HUMAN	X.FTPGTFTNQIQAAFREPR.X	FTPGTFTNQIQAAFREPR	2	0.9786	2	103	120	18	2080.05	0h
sp|P08865|RSSA_HUMAN	R.EHPWEVMPDLYFYRDPEEIEKEEQAAAEK.A	EHPWEVMPDLYFYRDPEEIEKEEQAAAEK	3	0.9873	2	192	220	29	3577.63	0h
sp|P08865|RSSA_HUMAN	K.SDGIYIINLK.R	SDGIYIINLK	4	0.9967	2	43	52	10	1134.63	0h
sp|P08865|RSSA_HUMAN	X.GAHSVGLMWWMLAR.X	GAHSVGLMWWMLAR	3	0.9999	15	167	180	14	1613.79	0h
sp|P08865|RSSA_HUMAN	R.LLVVTDPR.A	LLVVTDPR	3	0.9999	7	121	128	8	911.543	0h
sp|P08865|RSSA_HUMAN	R.AIVAIENPADVSVISSR.N	AIVAIENPADVSVISSR	3	1	12	64	80	17	1739.94	0h
sp|P08865|RSSA_HUMAN	R.DPEEIEKEEQAAAEK.A	DPEEIEKEEQAAAEK	3	1	5	206	220	15	1714.79	0h
sp|P08865|RSSA_HUMAN	K.FAAATGATPIAGR.F	FAAATGATPIAGR	3	1	8	90	102	13	1202.64	0h
sp|P08865|RSSA_HUMAN	K.FLAAGTHLGGTNLDFQMEQYIYK.R	FLAAGTHLGGTNLDFQMEQYIYK	2	1	1	18	40	23	2616.26	0h
sp|P08865|RSSA_HUMAN	R.FTPGTFTNQIQAAFR.E	FTPGTFTNQIQAAFR	2	1	7	103	117	15	1697.85	0h
sp|P08865|RSSA_HUMAN	R.KSDGIYIINLK.R	KSDGIYIINLK	4	1	11	42	52	11	1262.72	0h
sp|P09012|SNRPA_HUMAN	X.SMQGFPFYDKPMR.X	SMQGFPFYDKPMR	1	0.9685	1	71	83	13	1602.73	0h
sp|P09110|THIK_HUMAN	X.DTTPDELLSAVMTAVLK.X	DTTPDELLSAVMTAVLK	5	0.9857	1	58	74	17	1802.93	0h
sp|P09211|GSTP1_HUMAN	K.AFLASPEYVNLPINGNGK.Q	AFLASPEYVNLPINGNGK	2	1	8	192	209	18	1902.98	0h
sp|P09211|GSTP1_HUMAN	K.ALPGQLKPFETLLSQNQGGK.T	ALPGQLKPFETLLSQNQGGK	1	1	15	122	141	20	2125.15	0h
sp|P09211|GSTP1_HUMAN	K.DQQEAALVDMVNDGVEDLR.C	DQQEAALVDMVNDGVEDLR	2	1	25	83	101	19	2115.97	0h
sp|P09211|GSTP1_HUMAN	K.FQDGDLTLYQSNTILR.H	FQDGDLTLYQSNTILR	2	1	15	56	71	16	1882.94	0h
sp|P09211|GSTP1_HUMAN	R.MLLADQGQSWK.E	MLLADQGQSWK	2	1	1	20	30	11	1275.63	0h
sp|P09211|GSTP1_HUMAN	R.MLLADQGQSWKEEVVTVETWQEGSLK.A	MLLADQGQSWKEEVVTVETWQEGSLK	2	1	7	20	45	26	2990.47	0h
sp|P09211|GSTP1_HUMAN	X.PPYTVVYFPVR.X	PPYTVVYFPVR	2	1	8	2	12	11	1336.72	0h
sp|P09211|GSTP1_HUMAN	K.YISLIYTNYEAGKDDYVK.A	YISLIYTNYEAGKDDYVK	1	1	12	104	121	18	2154.05	0h
sp|P09234|RU1C_HUMAN	K.ENVKDYYQK.W	ENVKDYYQK	3	0.9973	4	32	40	9	1185.56	0h
sp|P09234|RU1C_HUMAN	X.WMEEQAQSLIDK.X	WMEEQAQSLIDK	3	1	7	41	52	12	1476.69	0h
sp|P09382|LEG1_HUMAN	K.LPDGYEFK.F	LPDGYEFK	1	0.9894	4	101	108	8	967.463	0h
sp|P09382|LEG1_HUMAN	K.SFVLNLGK.D	SFVLNLGK	1	0.9992	3	30	37	8	876.504	0h
sp|P09382|LEG1_HUMAN	R.LNLEAINYMAADGDFK.I	LNLEAINYMAADGDFK	1	1	8	113	128	16	1783.84	0h
sp|P09429|HMGB1_HUMAN	K.IKGEHPGLSIGDVAKK.L	IKGEHPGLSIGDVAKK	5	0.9701	1	113	128	16	1647.93	0h
sp|P09429|HMGB1_HUMAN	K.KFKDPNAPK.R	KFKDPNAPK	7	0.981	6	88	96	9	1043.57	0h
sp|P09429|HMGB1_HUMAN	K.KHPDASVNFSEFSKK.C	KHPDASVNFSEFSKK	5	0.9983	5	30	44	15	1719.85	0h
sp|P09429|HMGB1_HUMAN	K.GKFEDMAK.A	GKFEDMAK	7	0.9999	23	58	65	8	924.434	0h
sp|P09429|HMGB1_HUMAN	K.KKHPDASVNFSEFSK.K	KKHPDASVNFSEFSK	5	0.9999	11	29	43	15	1719.85	0h
sp|P09429|HMGB1_HUMAN	K.EKGKFEDMAK.A	EKGKFEDMAK	7	1	5	56	65	10	1181.57	0h
sp|P09429|HMGB1_HUMAN	K.HPDASVNFSEFSK.K	HPDASVNFSEFSK	5	1	1	31	43	13	1463.67	0h
sp|P09429|HMGB1_HUMAN	K.KHPDASVNFSEFSK.K	KHPDASVNFSEFSK	5	1	12	30	43	14	1591.76	0h
sp|P09429|HMGB1_HUMAN	K.KLGEMWNNTAADDKQPYEK.K	KLGEMWNNTAADDKQPYEK	4	1	36	128	146	19	2237.04	0h
sp|P09429|HMGB1_HUMAN	K.LGEMWNNTAADDKQPYEK.K	LGEMWNNTAADDKQPYEK	4	1	18	129	146	18	2108.95	0h
sp|P09429|HMGB1_HUMAN	K.LGEMWNNTAADDKQPYEKK.A	LGEMWNNTAADDKQPYEKK	2	1	4	129	147	19	2237.04	0h
sp|P09429|HMGB1_HUMAN	K.RPPSAFFLFCSEYRPK.I	RPPSAFFLFCSEYRPK	4	1	9	97	112	16	1943.97	0h
sp|P09429|HMGB1_HUMAN	K.TYIPPKGETK.K	TYIPPKGETK	6	1	10	77	86	10	1132.61	0h
sp|P09467|F16P1_HUMAN	R.APVILGSPDDVLEFLK.V	APVILGSPDDVLEFLK	1	1	8	315	330	16	1711.94	0h
sp|P09493|TPM1_HUMAN	X.MEIQEIQLK.X	MEIQEIQLK	9	0.9741	7	141	149	9	1130.6	0h
sp|P09496|CLCA_HUMAN	K.WREEQMER.L	WREEQMER	2	0.904	1	113	120	8	1162.52	0h
sp|P09496|CLCA_HUMAN	X.LEALDANSR.X	LEALDANSR	2	0.9896	1	121	129	9	987.498	0h
sp|P09622|DLDH_HUMAN	K.ALTGGIAHLFK.Q	ALTGGIAHLFK	3	0.998	10	133	143	11	1126.65	0h
sp|P09622|DLDH_HUMAN	K.ADGGTQVIDTK.N	ADGGTQVIDTK	2	0.9989	5	167	177	11	1103.54	0h
sp|P09622|DLDH_HUMAN	K.ALLNNSHYYHMAHGK.D	ALLNNSHYYHMAHGK	4	0.9991	2	90	104	15	1754.83	0h
sp|P09622|DLDH_HUMAN	K.IPNIYAIGDVVAGPMLAHK.A	IPNIYAIGDVVAGPMLAHK	3	1	15	347	365	19	1978.07	0h
sp|P09622|DLDH_HUMAN	K.NLGLEELGIELDPR.G	NLGLEELGIELDPR	3	1	5	321	334	14	1566.83	0h
sp|P09622|DLDH_HUMAN	K.SEEQLKEEGIEYK.V	SEEQLKEEGIEYK	3	1	17	405	417	13	1580.76	0h
sp|P09651|ROA1_HUMAN	K.EDTEEHHLR.D	EDTEEHHLR	4	0.981	5	114	122	9	1164.52	0h
sp|P09651|ROA1_HUMAN	K.SESPKEPEQLRK.L	SESPKEPEQLRK	1	0.9862	9	4	15	12	1426.74	0h
sp|P09651|ROA1_HUMAN	R.GFAFVTFDDHDSVDK.I	GFAFVTFDDHDSVDK	2	1	12	147	161	15	1698.75	0h
sp|P09651|ROA1_HUMAN	R.GFAFVTFDDHDSVDKIVIQK.Y	GFAFVTFDDHDSVDKIVIQK	2	1	12	147	166	20	2280.14	0h
sp|P09651|ROA1_HUMAN	X.GFGFVTYATVEEVDAAMNAR.X	GFGFVTYATVEEVDAAMNAR	1	1	35	56	75	20	2147	0h
sp|P09651|ROA1_HUMAN	R.GFGFVTYATVEEVDAAMNARPHK.V	GFGFVTYATVEEVDAAMNARPHK	1	1	19	56	78	23	2509.2	0h
sp|P09651|ROA1_HUMAN	K.IEVIEIMTDR.G	IEVIEIMTDR	2	1	11	131	140	10	1217.63	0h
sp|P09651|ROA1_HUMAN	X.IFVGGIKEDTEEHHLR.X	IFVGGIKEDTEEHHLR	2	1	33	107	122	16	1878.96	0h
sp|P09651|ROA1_HUMAN	R.KLFIGGLSFETTDESLR.S	KLFIGGLSFETTDESLR	2	1	16	15	31	17	1911.99	0h
sp|P09651|ROA1_HUMAN	K.LFIGGLSFETTDESLR.S	LFIGGLSFETTDESLR	2	1	33	16	31	16	1783.9	0h
sp|P09651|ROA1_HUMAN	R.NQGGYGGSSSSSSYGSGR.R	NQGGYGGSSSSSSYGSGR	1	1	30	353	370	18	1693.69	0h
sp|P09651|ROA1_HUMAN	K.SESPKEPEQLR.K	SESPKEPEQLR	1	1	17	4	14	11	1298.65	0h
sp|P09651|ROA1_HUMAN	R.SSGPYGGGGQYFAKPR.N	SSGPYGGGGQYFAKPR	1	1	18	337	352	16	1627.77	0h
sp|P09661|RU2A_HUMAN	K.TFNPGAGLPTDK.K	TFNPGAGLPTDK	1	0.9748	1	180	191	12	1216.61	0h
sp|P09661|RU2A_HUMAN	K.GLLQSGQIPGR.E	GLLQSGQIPGR	1	0.9992	4	222	232	11	1124.63	0h
sp|P09661|RU2A_HUMAN	K.LTAELIEQAAQYTNAVR.D	LTAELIEQAAQYTNAVR	2	1	8	4	20	17	1889.98	0h
sp|P09661|RU2A_HUMAN	K.NAIANASTLAEVER.L	NAIANASTLAEVER	1	1	4	206	219	14	1457.75	0h
sp|P09661|RU2A_HUMAN	K.SLTYLSILR.N	SLTYLSILR	2	1	4	114	122	9	1064.62	0h
sp|P09874|PARP1_HUMAN	K.LEQMPSKEDAIEHFMK.L	LEQMPSKEDAIEHFMK	1	0.9033	1	601	616	16	1931.91	0h
sp|P09874|PARP1_HUMAN	K.SKLPKPVQDLIK.M	SKLPKPVQDLIK	1	0.9554	2	663	674	12	1364.84	0h
sp|P09874|PARP1_HUMAN	R.IAPPEAPVTGYMFGK.G	IAPPEAPVTGYMFGK	1	0.988	1	879	893	15	1576.79	0h
sp|P09874|PARP1_HUMAN	K.MIFDVESMK.K	MIFDVESMK	1	0.9944	3	675	683	9	1098.51	0h
sp|P09874|PARP1_HUMAN	R.DSEEAEIIRK.Y	DSEEAEIIRK	1	0.9973	1	807	816	10	1188.6	0h
sp|P09874|PARP1_HUMAN	K.GQVKEEGINK.S	GQVKEEGINK	1	0.9984	6	509	518	10	1100.58	0h
sp|P09874|PARP1_HUMAN	K.AEPVEVVAPR.G	AEPVEVVAPR	1	0.9991	2	487	496	10	1065.58	0h
sp|P09874|PARP1_HUMAN	K.MIFDVESMKK.A	MIFDVESMKK	1	0.9991	3	675	684	10	1226.6	0h
sp|P09874|PARP1_HUMAN	K.VVDRDSEEAEIIR.K	VVDRDSEEAEIIR	1	0.9991	3	803	815	13	1529.77	0h
sp|P09874|PARP1_HUMAN	K.QQVPSGESAILDR.V	QQVPSGESAILDR	1	0.9998	2	270	282	13	1398.71	0h
sp|P09874|PARP1_HUMAN	X.NTHATTHNAYDLEVIDIFK.X	NTHATTHNAYDLEVIDIFK	1	0.9999	1	820	838	19	2201.07	0h
sp|P09874|PARP1_HUMAN	R.FYTLIPHDFGMK.K	FYTLIPHDFGMK	1	1	9	736	747	12	1467.72	0h
sp|P09874|PARP1_HUMAN	K.GFSLLATEDKEALKK.Q	GFSLLATEDKEALKK	1	1	2	183	197	15	1648.9	0h
sp|P09874|PARP1_HUMAN	K.GGAAVDPDSGLEHSAHVLEK.G	GGAAVDPDSGLEHSAHVLEK	1	1	5	529	548	20	1987.96	0h
sp|P09874|PARP1_HUMAN	R.GGSDDSSKDPIDVNYEK.L	GGSDDSSKDPIDVNYEK	1	1	17	780	796	17	1824.8	0h
sp|P09874|PARP1_HUMAN	X.HPDVEVDGFSELR.X	HPDVEVDGFSELR	3	1	8	66	78	13	1498.7	0h
sp|P09874|PARP1_HUMAN	K.KFYPLEIDYGQDEEAVKK.L	KFYPLEIDYGQDEEAVKK	1	1	3	637	654	18	2171.07	0h
sp|P09874|PARP1_HUMAN	R.KGDEVDGVDEVAK.K	KGDEVDGVDEVAK	1	1	12	209	221	13	1359.65	0h
sp|P09874|PARP1_HUMAN	K.KPPLLNNADSVQAK.V	KPPLLNNADSVQAK	1	1	13	748	761	14	1493.82	0h
sp|P09874|PARP1_HUMAN	K.LQLLEDDKENR.Y	LQLLEDDKENR	1	1	12	572	582	11	1371.7	0h
sp|P09874|PARP1_HUMAN	R.MAIMVQSPMFDGK.V	MAIMVQSPMFDGK	3	1	2	35	47	13	1453.67	0h
sp|P09874|PARP1_HUMAN	R.QIQAAYSILSEVQQAVSQGSSDSQILDLSNR.F	QIQAAYSILSEVQQAVSQGSSDSQILDLSNR	1	1	14	705	735	31	3334.66	0h
sp|P09874|PARP1_HUMAN	K.RKGDEVDGVDEVAK.K	RKGDEVDGVDEVAK	1	1	3	208	221	14	1515.75	0h
sp|P09874|PARP1_HUMAN	K.SLQELFLAHILSPWGAEVK.A	SLQELFLAHILSPWGAEVK	1	1	22	468	486	19	2137.16	0h
sp|P09874|PARP1_HUMAN	K.TLGDFAAEYAK.S	TLGDFAAEYAK	1	1	7	109	119	11	1184.57	0h
sp|P09874|PARP1_HUMAN	R.TTNFAGILSQGLR.I	TTNFAGILSQGLR	1	1	6	866	878	13	1376.74	0h
sp|P09874|PARP1_HUMAN	K.VEMLDNLLDIEVAYSLLR.G	VEMLDNLLDIEVAYSLLR	1	1	14	762	779	18	2105.11	0h
sp|P09874|PARP1_HUMAN	R.VVSEDFLQDVSASTK.S	VVSEDFLQDVSASTK	1	1	14	453	467	15	1623.8	0h
sp|P09972|ALDOC_HUMAN	K.GVVPLAGTDGETTTQGLDGLSER.C	GVVPLAGTDGETTTQGLDGLSER	3	1	9	112	134	23	2272.12	0h
sp|P09972|ALDOC_HUMAN	K.VDKGVVPLAGTDGETTTQGLDGLSER.C	VDKGVVPLAGTDGETTTQGLDGLSER	3	1	8	109	134	26	2614.31	0h
sp|P0C0S5|H2AZ_HUMAN	X.HLQLAIRGDEELDSLIK.X	HLQLAIRGDEELDSLIK	7	0.99	5	86	102	17	1949.06	0h
sp|P0C0S5|H2AZ_HUMAN	X.GDEELDSLIK.X	GDEELDSLIK	7	1	6	93	102	10	1117.55	0h
sp|P0C0S8|H2A1_HUMAN	X.NDEELNKLLGK.X	NDEELNKLLGK	10	1	19	90	100	11	1271.67	0h
sp|P0C7P4|UCRIL_HUMAN	K.VPDFSEYR.R	VPDFSEYR	2	0.9999	5	94	101	8	1011.47	0h
sp|P0C7P4|UCRIL_HUMAN	X.GVAGALRPLVQATVPATPEQPVLDLK.X	GVAGALRPLVQATVPATPEQPVLDLK	2	1	1	30	55	26	2639.5	0h
sp|P0CB43|F203B_HUMAN	X.ALLAGQAALLQALMELAPASAPAR.X	ALLAGQAALLQALMELAPASAPAR	2	1	4	56	79	24	2346.31	0h
sp|P0CG47|UBB_HUMAN	X.ESTLHLVLR.X	ESTLHLVLR	19	1	24	64	72	9	1066.61	0h
sp|P0CG47|UBB_HUMAN	X.IQDKEGIPPDQQR.X	IQDKEGIPPDQQR	18	1	27	30	42	13	1522.77	0h
sp|P10124|SRGN_HUMAN	K.GPMFELLPGESNK.I	GPMFELLPGESNK	1	1	1	54	66	13	1417.69	0h
sp|P10153|RNAS2_HUMAN	X.DPPQYPVVPVHLDR.X	DPPQYPVVPVHLDR	1	0.9991	1	146	159	14	1630.85	0h
sp|P10153|RNAS2_HUMAN	R.RDPPQYPVVPVHLDR.I	RDPPQYPVVPVHLDR	1	1	4	145	159	15	1786.95	0h
sp|P10153|RNAS2_HUMAN	R.YAQTPANMFYIVACDNR.D	YAQTPANMFYIVACDNR	1	1	2	125	141	17	1975.89	0h
sp|P10155|RO60_HUMAN	R.IHPFHILIALETYK.T	IHPFHILIALETYK	4	0.999	1	319	332	14	1693.95	0h
sp|P10155|RO60_HUMAN	X.ALLQEMPLTALLR.X	ALLQEMPLTALLR	4	1	14	271	283	13	1467.85	0h
sp|P10155|RO60_HUMAN	R.IPTHLFTFIQFK.K	IPTHLFTFIQFK	4	1	3	121	132	12	1490.83	0h
sp|P10415|BCL2_HUMAN	X.TSPLQTPAAPGAAAGPALSPVPPVVHLTLR.X	TSPLQTPAAPGAAAGPALSPVPPVVHLTLR	2	1	1	69	98	30	2885.61	0h
sp|P10515|ODP2_HUMAN	K.ILVPEGTR.D	ILVPEGTR	2	0.9889	3	275	282	8	883.512	0h
sp|P10515|ODP2_HUMAN	K.GVETIANDVVSLATK.A	GVETIANDVVSLATK	4	1	10	533	547	15	1515.81	0h
sp|P10515|ODP2_HUMAN	K.ISVNDFIIK.A	ISVNDFIIK	4	1	10	474	482	9	1047.59	0h
sp|P10515|ODP2_HUMAN	K.VPEANSSWMDTVIR.Q	VPEANSSWMDTVIR	4	1	10	491	504	14	1603.77	0h
sp|P10599|THIO_HUMAN	X.MIKPFFHSLSEK.X	MIKPFFHSLSEK	1	0.998	8	37	48	12	1462.76	0h
sp|P10599|THIO_HUMAN	K.EKLEATINELV.-	EKLEATINELV	2	0.9987	6	95	105	11	1257.68	0h
sp|P10599|THIO_HUMAN	K.TAFQEALDAAGDK.L	TAFQEALDAAGDK	2	1	4	9	21	13	1335.63	0h
sp|P10606|COX5B_HUMAN	K.KGLDPYNVLAPK.G	KGLDPYNVLAPK	2	1	9	57	68	12	1313.73	0h
sp|P10619|PPGB_HUMAN	K.HLHYWFVESQK.D	HLHYWFVESQK	3	1	1	61	71	11	1472.72	0h
sp|P10644|KAP0_HUMAN	K.HNIQALLK.D	HNIQALLK	2	1	7	25	32	8	935.554	0h
sp|P10644|KAP0_HUMAN	X.LTVADALEPVQFEDGQK.X	LTVADALEPVQFEDGQK	2	1	11	265	281	17	1858.93	0h
sp|P10644|KAP0_HUMAN	K.VSILESLDKWER.L	VSILESLDKWER	2	1	12	253	264	12	1473.78	0h
sp|P10768|ESTD_HUMAN	K.AYDATHLVK.S	AYDATHLVK	1	1	7	201	209	9	1016.53	0h
sp|P10768|ESTD_HUMAN	R.MYSYVTEELPQLINANFPVDPQR.M	MYSYVTEELPQLINANFPVDPQR	1	1	26	120	142	23	2723.33	0h
sp|P10809|CH60_HUMAN	K.GANPVEIR.R	GANPVEIR	3	0.9943	4	134	141	8	854.46	0h
sp|P10809|CH60_HUMAN	K.IPAMTIAK.N	IPAMTIAK	1	0.999	7	474	481	8	843.487	0h
sp|P10809|CH60_HUMAN	X.IGIEIIKR.X	IGIEIIKR	1	0.9999	17	463	470	8	940.605	0h
sp|P10809|CH60_HUMAN	K.VGEVIVTK.D	VGEVIVTK	1	0.9999	13	345	352	8	843.504	0h
sp|P10809|CH60_HUMAN	R.ALMLQGVDLLADAVAVTMGPK.G	ALMLQGVDLLADAVAVTMGPK	7	1	463	38	58	21	2112.13	0h
sp|P10809|CH60_HUMAN	K.APGFGDNRK.N	APGFGDNRK	1	1	3	302	310	9	960.475	0h
sp|P10809|CH60_HUMAN	K.DMAIATGGAVFGEEGLTLNLEDVQPHDLGK.V	DMAIATGGAVFGEEGLTLNLEDVQPHDLGK	1	1	237	315	344	30	3096.5	0h
sp|P10809|CH60_HUMAN	X.GVMLAVDAVIAELK.X	GVMLAVDAVIAELK	3	1	14	143	156	14	1427.8	0h
sp|P10809|CH60_HUMAN	R.GVMLAVDAVIAELKK.Q	GVMLAVDAVIAELKK	3	1	37	143	157	15	1555.9	0h
sp|P10809|CH60_HUMAN	R.GYISPYFINTSK.G	GYISPYFINTSK	2	1	5	222	233	12	1388.69	0h
sp|P10809|CH60_HUMAN	K.IMQSSSEVGYDAMAGDFVNMVEK.G	IMQSSSEVGYDAMAGDFVNMVEK	1	1	20	494	516	23	2507.1	0h
sp|P10809|CH60_HUMAN	R.IQEIIEQLDVTTSEYEK.E	IQEIIEQLDVTTSEYEK	1	1	11	371	387	17	2037.02	0h
sp|P10809|CH60_HUMAN	R.IQEIIEQLDVTTSEYEKEK.L	IQEIIEQLDVTTSEYEKEK	1	1	8	371	389	19	2294.15	0h
sp|P10809|CH60_HUMAN	K.ISSIQSIVPALEIANAHR.K	ISSIQSIVPALEIANAHR	1	1	30	251	268	18	1918.06	0h
sp|P10809|CH60_HUMAN	K.KISSIQSIVPALEIANAHR.K	KISSIQSIVPALEIANAHR	1	1	6	250	268	19	2046.16	0h
sp|P10809|CH60_HUMAN	R.KPLVIIAEDVDGEALSTLVLNR.L	KPLVIIAEDVDGEALSTLVLNR	1	1	365	269	290	22	2364.32	0h
sp|P10809|CH60_HUMAN	X.LKVGLQVVAVK.X	LKVGLQVVAVK	1	1	1	291	301	11	1152.76	0h
sp|P10809|CH60_HUMAN	K.LSDGVAVLK.V	LSDGVAVLK	1	1	10	397	405	9	900.525	0h
sp|P10809|CH60_HUMAN	K.LVQDVANNTNEEAGDGTTTATVLAR.S	LVQDVANNTNEEAGDGTTTATVLAR	4	1	29	97	121	25	2559.24	0h
sp|P10809|CH60_HUMAN	K.NAGVEGSLIVEK.I	NAGVEGSLIVEK	1	1	7	482	493	12	1214.65	0h
sp|P10809|CH60_HUMAN	K.QSKPVTTPEEIAQVATISANGDKEIGNIISDAMK.K	QSKPVTTPEEIAQVATISANGDKEIGNIISDAMK	3	1	52	158	191	34	3554.81	0h
sp|P10809|CH60_HUMAN	K.QSKPVTTPEEIAQVATISANGDKEIGNIISDAMKK.V	QSKPVTTPEEIAQVATISANGDKEIGNIISDAMKK	3	1	15	158	192	35	3682.91	0h
sp|P10809|CH60_HUMAN	R.RGVMLAVDAVIAELK.K	RGVMLAVDAVIAELK	3	1	2	142	156	15	1583.9	0h
sp|P10809|CH60_HUMAN	R.RGVMLAVDAVIAELKK.Q	RGVMLAVDAVIAELKK	3	1	15	142	157	16	1712	0h
sp|P10809|CH60_HUMAN	R.TALLDAAGVASLLTTAEVVVTEIPK.E	TALLDAAGVASLLTTAEVVVTEIPK	1	1	31	527	551	25	2481.39	0h
sp|P10809|CH60_HUMAN	R.TALLDAAGVASLLTTAEVVVTEIPKEEK.D	TALLDAAGVASLLTTAEVVVTEIPKEEK	1	1	38	527	554	28	2867.57	0h
sp|P10809|CH60_HUMAN	R.TALLDAAGVASLLTTAEVVVTEIPKEEKDPGMGAMGGMGGGMGGGMF.-	TALLDAAGVASLLTTAEVVVTEIPKEEKDPGMGAMGGMGGGMGGGMF	1	1	33	527	573	47	4523.17	0h
sp|P10809|CH60_HUMAN	X.TLKIPAMTIAK.X	TLKIPAMTIAK	1	1	3	471	481	11	1185.71	0h
sp|P10809|CH60_HUMAN	K.TLNDELEIIEGMK.F	TLNDELEIIEGMK	3	1	12	206	218	13	1503.75	0h
sp|P10809|CH60_HUMAN	X.TLNDELEIIEGMKFDR.X	TLNDELEIIEGMKFDR	3	1	12	206	221	16	1921.94	0h
sp|P10809|CH60_HUMAN	R.TVIIEQSWGSPK.V	TVIIEQSWGSPK	6	1	5	61	72	12	1343.71	0h
sp|P10809|CH60_HUMAN	K.VGEVIVTKDDAMLLK.G	VGEVIVTKDDAMLLK	1	1	11	345	359	15	1629.9	0h
sp|P10809|CH60_HUMAN	K.VGGTSDVEVNEK.K	VGGTSDVEVNEK	1	1	12	406	417	12	1232.59	0h
sp|P10809|CH60_HUMAN	K.VGGTSDVEVNEKK.D	VGGTSDVEVNEKK	1	1	1	406	418	13	1360.68	0h
sp|P10809|CH60_HUMAN	X.VGLQVVAVK.X	VGLQVVAVK	1	1	7	293	301	9	911.577	0h
sp|P10809|CH60_HUMAN	R.VTDALNATR.A	VTDALNATR	1	1	17	421	429	9	959.503	0h
sp|P11021|GRP78_HUMAN	K.VLEDSDLK.K	VLEDSDLK	1	0.981	3	345	352	8	917.469	0h
sp|P11021|GRP78_HUMAN	K.VLEDSDLKK.S	VLEDSDLKK	1	0.997	7	345	353	9	1045.56	0h
sp|P11021|GRP78_HUMAN	K.MKETAEAYLGKK.V	MKETAEAYLGKK	1	0.9985	5	153	164	12	1367.71	0h
sp|P11021|GRP78_HUMAN	K.ITITNDQNR.L	ITITNDQNR	1	0.9994	16	524	532	9	1073.55	0h
sp|P11021|GRP78_HUMAN	K.EFFNGKEPSR.G	EFFNGKEPSR	1	0.9999	5	377	386	10	1209.58	0h
sp|P11021|GRP78_HUMAN	R.AKFEELNMDLFR.S	AKFEELNMDLFR	1	1	14	325	336	12	1511.74	0h
sp|P11021|GRP78_HUMAN	K.DAGTIAGLNVMR.I	DAGTIAGLNVMR	1	1	13	186	197	12	1216.62	0h
sp|P11021|GRP78_HUMAN	K.DNHLLGTFDLTGIPPAPR.G	DNHLLGTFDLTGIPPAPR	1	1	25	475	492	18	1933.01	0h
sp|P11021|GRP78_HUMAN	X.ELEEIVQPIISK.X	ELEEIVQPIISK	1	1	5	622	633	12	1396.78	0h
sp|P11021|GRP78_HUMAN	K.FEELNMDLFR.S	FEELNMDLFR	1	1	6	327	336	10	1312.61	0h
sp|P11021|GRP78_HUMAN	R.IEIESFYEGEDFSETLTR.A	IEIESFYEGEDFSETLTR	1	1	8	307	324	18	2163.99	0h
sp|P11021|GRP78_HUMAN	K.IEWLESHQDADIEDFK.A	IEWLESHQDADIEDFK	1	1	18	602	617	16	1973.9	0h
sp|P11021|GRP78_HUMAN	K.IEWLESHQDADIEDFKAK.K	IEWLESHQDADIEDFKAK	1	1	1	602	619	18	2173.03	0h
sp|P11021|GRP78_HUMAN	R.IINEPTAAAIAYGLDK.R	IINEPTAAAIAYGLDK	10	1	13	198	213	16	1658.89	0h
sp|P11021|GRP78_HUMAN	R.IINEPTAAAIAYGLDKR.E	IINEPTAAAIAYGLDKR	1	1	25	198	214	17	1814.99	0h
sp|P11021|GRP78_HUMAN	R.ITPSYVAFTPEGER.L	ITPSYVAFTPEGER	1	1	15	61	74	14	1565.77	0h
sp|P11021|GRP78_HUMAN	K.KKELEEIVQPIISK.L	KKELEEIVQPIISK	1	1	17	620	633	14	1652.97	0h
sp|P11021|GRP78_HUMAN	K.KSDIDEIVLVGGSTR.I	KSDIDEIVLVGGSTR	1	1	13	353	367	15	1587.84	0h
sp|P11021|GRP78_HUMAN	K.LYGSAGPPPTGEEDTAEKDEL.-	LYGSAGPPPTGEEDTAEKDEL	1	1	15	634	654	21	2174.99	0h
sp|P11021|GRP78_HUMAN	K.MKETAEAYLGK.K	MKETAEAYLGK	1	1	12	153	163	11	1239.61	0h
sp|P11021|GRP78_HUMAN	X.NELESYAYSLK.X	NELESYAYSLK	1	1	5	563	573	11	1315.63	0h
sp|P11021|GRP78_HUMAN	K.NQLTSNPENTVFDAK.R	NQLTSNPENTVFDAK	1	1	14	82	96	15	1676.8	0h
sp|P11021|GRP78_HUMAN	K.NQLTSNPENTVFDAKR.L	NQLTSNPENTVFDAKR	1	1	1	82	97	16	1832.9	0h
sp|P11021|GRP78_HUMAN	K.SDIDEIVLVGGSTR.I	SDIDEIVLVGGSTR	1	1	3	354	367	14	1459.75	0h
sp|P11021|GRP78_HUMAN	K.SQIFSTASDNQPTVTIK.V	SQIFSTASDNQPTVTIK	1	1	13	448	464	17	1835.93	0h
sp|P11021|GRP78_HUMAN	K.TFAPEEISAMVLTK.M	TFAPEEISAMVLTK	1	1	21	139	152	14	1535.79	0h
sp|P11021|GRP78_HUMAN	K.TKPYIQVDIGGGQTK.T	TKPYIQVDIGGGQTK	1	1	16	124	138	15	1603.85	0h
sp|P11021|GRP78_HUMAN	R.TWNDPSVQQDIK.F	TWNDPSVQQDIK	1	1	2	102	113	12	1429.68	0h
sp|P11021|GRP78_HUMAN	K.VTHAVVTVPAYFNDAQR.Q	VTHAVVTVPAYFNDAQR	1	1	17	165	181	17	1886.96	0h
sp|P11021|GRP78_HUMAN	K.VYEGERPLTK.D	VYEGERPLTK	1	1	11	465	474	10	1190.63	0h
sp|P11142|HSP7C_HUMAN	K.LLQDFFNGK.E	LLQDFFNGK	8	0.9987	3	349	357	9	1080.56	0h
sp|P11142|HSP7C_HUMAN	R.LSKEDIER.M	LSKEDIER	6	0.9989	12	510	517	8	988.518	0h
sp|P11142|HSP7C_HUMAN	K.LYQSAGGMPGGMPGGFPGGGAPPSGGASSGPTIEEVD.-	LYQSAGGMPGGMPGGFPGGGAPPSGGASSGPTIEEVD	4	0.9992	15	610	646	37	3345.49	0h
sp|P11142|HSP7C_HUMAN	X.IINEPTAAAIAYGLDKK.X	IINEPTAAAIAYGLDKK	6	0.9993	1	172	188	17	1786.98	0h
sp|P11142|HSP7C_HUMAN	R.ARFEELNADLFR.G	ARFEELNADLFR	7	1	12	300	311	12	1479.75	0h
sp|P11142|HSP7C_HUMAN	X.DAGTIAGLNVLR.X	DAGTIAGLNVLR	9	1	2	160	171	12	1198.66	0h
sp|P11142|HSP7C_HUMAN	X.FDDAVVQSDMK.X	FDDAVVQSDMK	11	1	1	78	88	11	1253.56	0h
sp|P11142|HSP7C_HUMAN	X.FEELNADLFR.X	FEELNADLFR	7	1	8	302	311	10	1252.61	0h
sp|P11142|HSP7C_HUMAN	K.HWPFMVVNDAGRPK.V	HWPFMVVNDAGRPK	11	1	24	89	102	14	1652.82	0h
sp|P11142|HSP7C_HUMAN	K.LDKSQIHDIVLVGGSTR.I	LDKSQIHDIVLVGGSTR	6	1	2	326	342	17	1837	0h
sp|P11142|HSP7C_HUMAN	K.MKEIAEAYLGK.T	MKEIAEAYLGK	10	1	11	127	137	11	1251.65	0h
sp|P11142|HSP7C_HUMAN	R.MVNHFIAEFK.R	MVNHFIAEFK	5	1	24	237	246	10	1234.61	0h
sp|P11142|HSP7C_HUMAN	K.NQTAEKEEFEHQQK.E	NQTAEKEEFEHQQK	6	1	18	584	597	14	1744.8	0h
sp|P11142|HSP7C_HUMAN	K.NQVAMNPTNTVFDAK.R	NQVAMNPTNTVFDAK	10	1	17	57	71	15	1648.79	0h
sp|P11142|HSP7C_HUMAN	K.NSLESYAFNMK.A	NSLESYAFNMK	6	1	8	540	550	11	1302.59	0h
sp|P11142|HSP7C_HUMAN	K.QTQTFTTYSDNQPGVLIQVYEGER.A	QTQTFTTYSDNQPGVLIQVYEGER	6	1	12	424	447	24	2773.32	0h
sp|P11142|HSP7C_HUMAN	R.RFDDAVVQSDMK.H	RFDDAVVQSDMK	11	1	11	77	88	12	1409.66	0h
sp|P11142|HSP7C_HUMAN	K.SFYPEEVSSMVLTK.M	SFYPEEVSSMVLTK	11	1	5	113	126	14	1615.78	0h
sp|P11142|HSP7C_HUMAN	K.SINPDEAVAYGAAVQAAILSGDK.S	SINPDEAVAYGAAVQAAILSGDK	5	1	29	362	384	23	2259.14	0h
sp|P11142|HSP7C_HUMAN	K.SQIHDIVLVGGSTR.I	SQIHDIVLVGGSTR	6	1	16	329	342	14	1480.8	0h
sp|P11142|HSP7C_HUMAN	K.STAGDTHLGGEDFDNR.M	STAGDTHLGGEDFDNR	5	1	22	221	236	16	1690.72	0h
sp|P11142|HSP7C_HUMAN	R.TTPSYVAFTDTER.L	TTPSYVAFTDTER	22	1	12	37	49	13	1486.69	0h
sp|P11142|HSP7C_HUMAN	K.TVTNAVVTVPAYFNDSQR.Q	TVTNAVVTVPAYFNDSQR	8	1	13	138	155	18	1980.99	0h
sp|P11142|HSP7C_HUMAN	K.VQVEYKGETK.S	VQVEYKGETK	11	1	10	103	112	10	1179.61	0h
sp|P11166|GTR1_HUMAN	K.VTILELFR.S	VTILELFR	2	0.9999	13	257	264	8	989.59	0h
sp|P11172|PYR5_HUMAN	K.GLQEVGLPLHR.G	GLQEVGLPLHR	2	0.9242	1	353	363	11	1217.69	0h
sp|P11172|PYR5_HUMAN	X.SGLSSPIYIDLR.X	SGLSSPIYIDLR	5	0.9899	1	30	41	12	1319.71	0h
sp|P11172|PYR5_HUMAN	R.AALGPLVTGLYDVQAFK.F	AALGPLVTGLYDVQAFK	5	1	3	6	22	17	1761.96	0h
sp|P11177|ODPB_HUMAN	X.ILEDNSIPQVK.X	ILEDNSIPQVK	2	0.9985	7	337	347	11	1254.68	0h
sp|P11177|ODPB_HUMAN	K.DFLIPIGK.A	DFLIPIGK	3	0.9992	2	220	227	8	901.525	0h
sp|P11177|ODPB_HUMAN	X.DAINQGMDEELERDEK.X	DAINQGMDEELERDEK	3	1	5	37	52	16	1890.83	0h
sp|P11177|ODPB_HUMAN	K.TYYMSGGLQPVPIVFR.G	TYYMSGGLQPVPIVFR	2	1	8	130	145	16	1826.94	0h
sp|P11216|PYGB_HUMAN	X.ARPEYMLPVHFYGR.X	ARPEYMLPVHFYGR	1	0.9992	2	193	206	14	1734.86	0h
sp|P11216|PYGB_HUMAN	R.LKQEYFVVAATLQDIIR.R	LKQEYFVVAATLQDIIR	6	1	2	294	310	17	2006.12	0h
sp|P11216|PYGB_HUMAN	X.LQDFNVGDYIEAVLDR.X	LQDFNVGDYIEAVLDR	1	1	1	255	270	16	1865.91	0h
sp|P11279|LAMP1_HUMAN	R.ALQATVGNSYK.C	ALQATVGNSYK	2	1	8	327	337	11	1150.6	0h
sp|P11279|LAMP1_HUMAN	K.TVESITDIR.A	TVESITDIR	1	1	7	138	146	9	1032.55	0h
sp|P11310|ACADM_HUMAN	K.VAMGAFDK.T	VAMGAFDK	2	0.9755	1	272	279	8	837.402	0h
sp|P11310|ACADM_HUMAN	K.TGEYPVPLIR.R	TGEYPVPLIR	3	0.9896	1	70	79	10	1143.63	0h
sp|P11310|ACADM_HUMAN	K.ENVLIGDGAGFK.V	ENVLIGDGAGFK	2	0.9901	2	260	271	12	1218.62	0h
sp|P11310|ACADM_HUMAN	K.AFAGDIANQLATDAVQILGGNGFNTEYPVEK.L	AFAGDIANQLATDAVQILGGNGFNTEYPVEK	2	1	10	359	389	31	3222.58	0h
sp|P11310|ACADM_HUMAN	K.ANWYFLLAR.S	ANWYFLLAR	2	1	10	198	206	9	1152.61	0h
sp|P11310|ACADM_HUMAN	K.TRPVVAAGAVGLAQR.A	TRPVVAAGAVGLAQR	2	1	1	280	294	15	1464.85	0h
sp|P11387|TOP1_HUMAN	K.ELTAPDENIPAK.I	ELTAPDENIPAK	1	0.9992	4	604	615	12	1296.66	0h
sp|P11387|TOP1_HUMAN	K.GPVFAPPYEPLPENVK.F	GPVFAPPYEPLPENVK	1	1	1	224	239	16	1752.91	0h
sp|P11387|TOP1_HUMAN	K.LEVQATDREENK.Q	LEVQATDREENK	1	1	2	701	712	12	1430.7	0h
sp|P11388|TOP2A_HUMAN	R.FLEEFITPIVK.V	FLEEFITPIVK	4	0.908	1	569	579	11	1334.75	0h
sp|P11388|TOP2A_HUMAN	R.EVTFVPGLYK.I	EVTFVPGLYK	6	0.9889	2	74	83	10	1151.62	0h
sp|P11388|TOP2A_HUMAN	X.MYVPALIFGQLLTSSNYDDDEKK.X	MYVPALIFGQLLTSSNYDDDEKK	4	0.9898	1	135	157	23	2646.28	0h
sp|P11388|TOP2A_HUMAN	K.RDPALNSGVSQKPDPAK.T	RDPALNSGVSQKPDPAK	4	0.9996	3	1443	1459	17	1778.92	0h
sp|P11388|TOP2A_HUMAN	R.YIFTMLSSLAR.L	YIFTMLSSLAR	4	1	3	805	815	11	1300.68	0h
sp|P11413|G6PD_HUMAN	R.GPTEADELMK.R	GPTEADELMK	1	0.9916	1	488	497	10	1089.5	0h
sp|P11413|G6PD_HUMAN	R.GGYFDEFGIIR.D	GGYFDEFGIIR	4	0.998	2	247	257	11	1272.61	0h
sp|P11413|G6PD_HUMAN	K.IYPTIWWLFR.D	IYPTIWWLFR	5	0.9991	2	48	57	10	1393.75	0h
sp|P11413|G6PD_HUMAN	K.EMVQNLMVLR.F	EMVQNLMVLR	5	0.9999	5	206	215	10	1231.64	0h
sp|P11413|G6PD_HUMAN	X.LKLEDFFAR.X	LKLEDFFAR	5	1	13	96	104	9	1137.62	0h
sp|P11413|G6PD_HUMAN	X.LNSHMNALHLGSQANR.X	LNSHMNALHLGSQANR	5	1	1	121	136	16	1761.87	0h
sp|P11586|C1TC_HUMAN	X.IYGADDIELLPEAQHK.X	IYGADDIELLPEAQHK	1	0.9663	1	833	848	16	1810.91	0h
sp|P11586|C1TC_HUMAN	X.EIGLLSEEVELYGETK.X	EIGLLSEEVELYGETK	1	0.9785	1	337	352	16	1807.91	0h
sp|P11586|C1TC_HUMAN	R.IFHELTQTDK.A	IFHELTQTDK	1	0.9816	1	464	473	10	1230.62	0h
sp|P11586|C1TC_HUMAN	K.VLLSALER.L	VLLSALER	1	0.9956	1	355	362	8	899.543	0h
sp|P11586|C1TC_HUMAN	R.LAILQVGNR.D	LAILQVGNR	1	0.9984	3	38	46	9	982.591	0h
sp|P11586|C1TC_HUMAN	R.AAQAPSSFQLLYDLK.L	AAQAPSSFQLLYDLK	1	1	4	805	819	15	1650.86	0h
sp|P11586|C1TC_HUMAN	R.ASFITPVPGGVGPMTVAMLMQSTVESAK.R	ASFITPVPGGVGPMTVAMLMQSTVESAK	1	1	7	265	292	28	2805.41	0h
sp|P11586|C1TC_HUMAN	K.GALALAQAVQR.A	GALALAQAVQR	1	1	2	794	804	11	1096.63	0h
sp|P11586|C1TC_HUMAN	R.KVVGDVAYDEAK.E	KVVGDVAYDEAK	1	1	2	251	262	12	1292.66	0h
sp|P11586|C1TC_HUMAN	R.LDIDPETITWQR.V	LDIDPETITWQR	1	1	11	521	532	12	1485.75	0h
sp|P11586|C1TC_HUMAN	R.MFGIPVVVAVNAFK.T	MFGIPVVVAVNAFK	1	1	7	747	760	14	1490.83	0h
sp|P11586|C1TC_HUMAN	X.TAHLDEEVNKGDILVVATGQPEMVK.X	TAHLDEEVNKGDILVVATGQPEMVK	1	1	1	199	223	25	2692.37	0h
sp|P11586|C1TC_HUMAN	K.TDPTTLTDEEINR.F	TDPTTLTDEEINR	1	1	10	505	517	13	1503.71	0h
sp|P11586|C1TC_HUMAN	K.TDTESELDLISR.L	TDTESELDLISR	1	1	2	761	772	12	1377.66	0h
sp|P11586|C1TC_HUMAN	K.THLSLSHNPEQK.G	THLSLSHNPEQK	1	1	1	867	878	12	1389.7	0h
sp|P11586|C1TC_HUMAN	K.TPVPSDIDISR.S	TPVPSDIDISR	1	1	7	314	324	11	1198.62	0h
sp|P11586|C1TC_HUMAN	K.WMIQYNNLNLK.T	WMIQYNNLNLK	1	1	13	303	313	11	1435.73	0h
sp|P11586|C1TC_HUMAN	K.YVVVTGITPTPLGEGK.S	YVVVTGITPTPLGEGK	1	1	9	371	386	16	1629.89	0h
sp|P11678|PERE_HUMAN	R.DFLPLVLGK.A	DFLPLVLGK	1	0.9974	8	433	441	9	1000.59	0h
sp|P11678|PERE_HUMAN	X.LAAMHTLFMR.X	LAAMHTLFMR	1	0.9981	11	384	393	10	1189.61	0h
sp|P11678|PERE_HUMAN	R.AADYMHVALGLLEEK.L	AADYMHVALGLLEEK	1	1	14	89	103	15	1658.83	0h
sp|P11678|PERE_HUMAN	R.ALMFMQWGQFIDHDLDFSPESPAR.V	ALMFMQWGQFIDHDLDFSPESPAR	1	1	11	221	244	24	2837.29	0h
sp|P11678|PERE_HUMAN	R.IGLDLAALNMQR.S	IGLDLAALNMQR	1	1	7	551	562	12	1313.71	0h
sp|P11678|PERE_HUMAN	R.IVYEGGIDPILR.G	IVYEGGIDPILR	1	1	6	509	520	12	1343.74	0h
sp|P11678|PERE_HUMAN	R.NGFLLPLVR.A	NGFLLPLVR	1	1	28	192	200	9	1027.62	0h
sp|P11678|PERE_HUMAN	R.SGSASPMDLLSYFK.Q	SGSASPMDLLSYFK	1	1	12	64	77	14	1501.71	0h
sp|P11678|PERE_HUMAN	R.WLPAEYEDGLSLPFGWTPSR.R	WLPAEYEDGLSLPFGWTPSR	1	1	9	170	189	20	2320.11	0h
sp|P11908|PRPS2_HUMAN	X.THNGESVSYLFSHVPL.X	THNGESVSYLFSHVPL	4	0.9992	3	303	318	16	1785.87	0h
sp|P11940|PABP1_HUMAN	X.MNGMLLNDR.X	MNGMLLNDR	6	0.9777	2	158	166	9	1062.49	0h
sp|P11940|PABP1_HUMAN	K.SGVGNIFIK.N	SGVGNIFIK	8	0.9923	2	96	104	9	933.525	0h
sp|P11940|PABP1_HUMAN	K.FGPALSVK.V	FGPALSVK	5	0.9931	1	214	221	8	817.467	0h
sp|P11940|PABP1_HUMAN	K.FSPAGPILSIR.V	FSPAGPILSIR	12	0.9991	2	31	41	11	1156.66	0h
sp|P11940|PABP1_HUMAN	R.KSGVGNIFIK.N	KSGVGNIFIK	8	0.9992	1	95	104	10	1061.62	0h
sp|P11940|PABP1_HUMAN	X.LFPLIQAMHPTLAGK.X	LFPLIQAMHPTLAGK	5	0.9992	12	566	580	15	1635.91	0h
sp|P11940|PABP1_HUMAN	R.AKEFTNVYIK.N	AKEFTNVYIK	6	1	4	187	196	10	1211.65	0h
sp|P11940|PABP1_HUMAN	R.ALDTMNFDVIK.G	ALDTMNFDVIK	10	1	3	68	78	11	1265.63	0h
sp|P11940|PABP1_HUMAN	K.ALYDTFSAFGNILSCK.V	ALYDTFSAFGNILSCK	8	1	12	114	129	16	1748.84	0h
sp|P11940|PABP1_HUMAN	K.GFGFVSFER.H	GFGFVSFER	5	1	11	232	240	9	1044.5	0h
sp|P11940|PABP1_HUMAN	K.GYGFVHFETQEAAER.A	GYGFVHFETQEAAER	4	1	5	139	153	15	1739.79	0h
sp|P11940|PABP1_HUMAN	K.ITGMLLEIDNSELLHMLESPESLR.S	ITGMLLEIDNSELLHMLESPESLR	7	1	15	581	604	24	2739.38	0h
sp|P11940|PABP1_HUMAN	R.IVATKPLYVALAQR.K	IVATKPLYVALAQR	5	1	9	357	370	14	1541.93	0h
sp|P11940|PABP1_HUMAN	K.NLDDGIDDER.L	NLDDGIDDER	5	1	3	300	309	10	1160.49	0h
sp|P11940|PABP1_HUMAN	R.QAHLTNQYMQR.M	QAHLTNQYMQR	3	1	19	375	385	11	1388.66	0h
sp|P11940|PABP1_HUMAN	R.SKVDEAVAVLQAHQAK.E	SKVDEAVAVLQAHQAK	5	1	7	605	620	16	1692.91	0h
sp|P11940|PABP1_HUMAN	R.SLGYAYVNFQQPADAER.A	SLGYAYVNFQQPADAER	11	1	14	51	67	17	1927.9	0h
sp|P11940|PABP1_HUMAN	R.YQGVNLYVK.N	YQGVNLYVK	5	1	2	291	299	9	1082.57	0h
sp|P12004|PCNA_HUMAN	R.LVQGSILKK.V	LVQGSILKK	1	0.9982	7	6	14	9	984.63	0h
sp|P12004|PCNA_HUMAN	R.LVQGSILK.K	LVQGSILK	1	0.9991	1	6	13	8	856.536	0h
sp|P12004|PCNA_HUMAN	K.MPSGEFAR.I	MPSGEFAR	1	0.9991	6	139	146	8	893.405	0h
sp|P12004|PCNA_HUMAN	R.AEDNADTLALVFEAPNQEK.V	AEDNADTLALVFEAPNQEK	1	1	20	92	110	19	2073.99	0h
sp|P12004|PCNA_HUMAN	K.ATPLSSTVTLSMSADVPLVVEYK.I	ATPLSSTVTLSMSADVPLVVEYK	1	1	3	218	240	23	2407.25	0h
sp|P12004|PCNA_HUMAN	R.DLSHIGDAVVISCAK.D	DLSHIGDAVVISCAK	1	1	8	150	164	15	1526.77	0h
sp|P12004|PCNA_HUMAN	K.IADMGHLK.Y	IADMGHLK	1	1	7	241	248	8	883.456	0h
sp|P12004|PCNA_HUMAN	K.LMDLDVEQLGIPEQEYSCVVK.M	LMDLDVEQLGIPEQEYSCVVK	1	1	6	118	138	21	2407.16	0h
sp|P12004|PCNA_HUMAN	K.LSQTSNVDKEEEAVTIEMNEPVQLTFALR.Y	LSQTSNVDKEEEAVTIEMNEPVQLTFALR	1	1	14	182	210	29	3290.63	0h
sp|P12004|PCNA_HUMAN	R.NLAMGVNLTSMSK.I	NLAMGVNLTSMSK	1	1	8	65	77	13	1364.68	0h
sp|P12004|PCNA_HUMAN	R.SEGFDTYR.C	SEGFDTYR	1	1	4	54	61	8	973.413	0h
sp|P12235|ADT1_HUMAN	R.GNLANVIR.Y	GNLANVIR	5	0.9884	1	73	80	8	855.491	0h
sp|P12236|ADT3_HUMAN	K.DFLAGGIAAAISK.T	DFLAGGIAAAISK	2	0.9988	1	11	23	13	1232.67	0h
sp|P12268|IMDH2_HUMAN	X.GMGSLDAMDK.X	GMGSLDAMDK	1	0.969	1	413	422	10	1023.43	0h
sp|P12268|IMDH2_HUMAN	K.TPLVSSPMDTVTEAGMAIAMALTGGIGFIHHNCTPEFQANEVR.K	TPLVSSPMDTVTEAGMAIAMALTGGIGFIHHNCTPEFQANEVR	1	0.9756	5	63	105	43	4513.15	0h
sp|P12268|IMDH2_HUMAN	K.EANEILQR.S	EANEILQR	10	0.9894	2	196	203	8	971.504	0h
sp|P12268|IMDH2_HUMAN	R.YFSEADKIK.V	YFSEADKIK	1	0.9987	1	430	438	9	1099.55	0h
sp|P12268|IMDH2_HUMAN	X.ALALGASTVMMGSLLAATTEAPGEYFFSDGIR.X	ALALGASTVMMGSLLAATTEAPGEYFFSDGIR	1	1	1	376	407	32	3246.59	0h
sp|P12268|IMDH2_HUMAN	K.DKYPNLQVIGGNVVTAAQAK.N	DKYPNLQVIGGNVVTAAQAK	1	1	25	292	311	20	2085.12	0h
sp|P12268|IMDH2_HUMAN	R.FGVPVIADGGIQNVGHIAK.A	FGVPVIADGGIQNVGHIAK	1	1	16	357	375	19	1891.03	0h
sp|P12268|IMDH2_HUMAN	K.GKLPIVNEDDELVAIIAR.T	GKLPIVNEDDELVAIIAR	2	1	12	207	224	18	1964.09	0h
sp|P12268|IMDH2_HUMAN	K.KYEQGFITDPVVLSPK.D	KYEQGFITDPVVLSPK	1	1	8	109	124	16	1819.97	0h
sp|P12268|IMDH2_HUMAN	K.LPIVNEDDELVAIIAR.T	LPIVNEDDELVAIIAR	2	1	15	209	224	16	1778.98	0h
sp|P12268|IMDH2_HUMAN	K.NLIDAGVDALR.V	NLIDAGVDALR	1	1	2	312	322	11	1155.62	0h
sp|P12268|IMDH2_HUMAN	K.REDLVVAPAGITLK.E	REDLVVAPAGITLK	2	1	5	182	195	14	1480.86	0h
sp|P12268|IMDH2_HUMAN	R.RFGVPVIADGGIQNVGHIAK.A	RFGVPVIADGGIQNVGHIAK	1	1	9	356	375	20	2047.13	0h
sp|P12268|IMDH2_HUMAN	R.TSSAQVEGGVHSLHSYEK.R	TSSAQVEGGVHSLHSYEK	1	1	18	494	511	18	1914.9	0h
sp|P12268|IMDH2_HUMAN	K.VAQGVSGAVQDK.G	VAQGVSGAVQDK	1	1	10	439	450	12	1157.6	0h
sp|P12270|TPR_HUMAN	X.LDELQASDVSVK.X	LDELQASDVSVK	1	0.9898	1	166	177	12	1302.66	0h
sp|P12270|TPR_HUMAN	X.LSQELEYLTEDVKR.X	LSQELEYLTEDVKR	1	0.9945	1	134	147	14	1721.88	0h
sp|P12270|TPR_HUMAN	R.GQNLLLTNLQTIQGILER.S	GQNLLLTNLQTIQGILER	1	1	6	811	828	18	2023.14	0h
sp|P12814|ACTN1_HUMAN	X.LAILGIHNEVSK.X	LAILGIHNEVSK	3	0.9757	2	566	577	12	1292.74	0h
sp|P12814|ACTN1_HUMAN	K.VLAVNQENEQLMEDYEK.L	VLAVNQENEQLMEDYEK	3	1	3	265	281	17	2050.95	0h
sp|P12955|PEPD_HUMAN	K.YAVDDVQYVDEIASVLTSQKPSVLLTLR.G	YAVDDVQYVDEIASVLTSQKPSVLLTLR	2	1	4	121	148	28	3121.65	0h
sp|P12956|XRCC6_HUMAN	X.ALKPPPIK.X	ALKPPPIK	4	0.9511	2	280	287	8	862.562	0h
sp|P12956|XRCC6_HUMAN	X.QELLEALTK.X	QELLEALTK	3	0.9545	1	597	605	9	1043.59	0h
sp|P12956|XRCC6_HUMAN	X.VEYSEEELK.X	VEYSEEELK	3	0.9799	2	557	565	9	1124.52	0h
sp|P12956|XRCC6_HUMAN	X.FDDPGLMLMGFK.X	FDDPGLMLMGFK	4	0.9891	5	340	351	12	1369.64	0h
sp|P12956|XRCC6_HUMAN	K.RFDDPGLMLMGFKPLVLLK.K	RFDDPGLMLMGFKPLVLLK	4	0.9975	1	339	357	19	2189.2	0h
sp|P12956|XRCC6_HUMAN	R.ILELDQFK.G	ILELDQFK	4	0.9989	14	116	123	8	1004.55	0h
sp|P12956|XRCC6_HUMAN	R.DSLIFLVDASK.A	DSLIFLVDASK	3	0.999	7	36	46	11	1206.65	0h
sp|P12956|XRCC6_HUMAN	K.ELVYPPDYNPEGK.V	ELVYPPDYNPEGK	4	0.999	7	527	539	13	1519.72	0h
sp|P12956|XRCC6_HUMAN	R.QIILEKEETEELKR.F	QIILEKEETEELKR	4	0.999	6	326	339	14	1756.96	0h
sp|P12956|XRCC6_HUMAN	R.DIISIAEDEDLR.V	DIISIAEDEDLR	4	1	12	219	230	12	1387.68	0h
sp|P12956|XRCC6_HUMAN	R.DTGIFLDLMHLK.K	DTGIFLDLMHLK	4	1	10	195	206	12	1401.73	0h
sp|P12956|XRCC6_HUMAN	R.FDDPGLMLMGFKPLVLLK.K	FDDPGLMLMGFKPLVLLK	4	1	25	340	357	18	2033.1	0h
sp|P12956|XRCC6_HUMAN	K.IQVTPPGFQLVFLPFADDK.R	IQVTPPGFQLVFLPFADDK	4	1	21	425	443	19	2131.13	0h
sp|P12956|XRCC6_HUMAN	K.IQVTPPGFQLVFLPFADDKR.K	IQVTPPGFQLVFLPFADDKR	4	1	15	425	444	20	2287.23	0h
sp|P12956|XRCC6_HUMAN	K.KPGGFDISLFYR.D	KPGGFDISLFYR	4	1	21	207	218	12	1398.73	0h
sp|P12956|XRCC6_HUMAN	K.KQELLEALTK.H	KQELLEALTK	3	1	6	596	605	10	1171.68	0h
sp|P12956|XRCC6_HUMAN	R.LGSLVDEFK.E	LGSLVDEFK	4	1	1	518	526	9	1006.53	0h
sp|P12956|XRCC6_HUMAN	X.NIPPYFVALVPQEEELDDQK.X	NIPPYFVALVPQEEELDDQK	4	1	7	405	424	20	2343.16	0h
sp|P12956|XRCC6_HUMAN	K.NIYVLQELDNPGAK.R	NIYVLQELDNPGAK	3	1	3	101	114	14	1572.81	0h
sp|P12956|XRCC6_HUMAN	R.NLEALALDLMEPEQAVDLTLPK.V	NLEALALDLMEPEQAVDLTLPK	4	1	30	489	510	22	2422.27	0h
sp|P12956|XRCC6_HUMAN	R.SDSFENPVLQQHFR.N	SDSFENPVLQQHFR	4	1	20	475	488	14	1702.81	0h
sp|P12956|XRCC6_HUMAN	R.TFNTSTGGLLLPSDTKR.S	TFNTSTGGLLLPSDTKR	4	1	15	302	318	17	1806.95	0h
sp|P12956|XRCC6_HUMAN	K.VEYSEEELKTHISK.G	VEYSEEELKTHISK	3	1	12	557	570	14	1690.84	0h
sp|P12956|XRCC6_HUMAN	R.VHFEESSKLEDLLR.K	VHFEESSKLEDLLR	4	1	7	231	244	14	1700.87	0h
sp|P13010|XRCC5_HUMAN	R.QYMFSSLK.N	QYMFSSLK	1	0.9179	1	432	439	8	1002.48	0h
sp|P13010|XRCC5_HUMAN	K.KDEKTDTLEDLFPTTK.I	KDEKTDTLEDLFPTTK	1	0.9599	1	466	481	16	1879.94	0h
sp|P13010|XRCC5_HUMAN	X.HIEIFTDLSSR.X	HIEIFTDLSSR	2	0.9757	1	131	141	11	1316.67	0h
sp|P13010|XRCC5_HUMAN	K.VITMFVQR.Q	VITMFVQR	2	0.996	1	37	44	8	992.546	0h
sp|P13010|XRCC5_HUMAN	K.TLFPLIEAK.K	TLFPLIEAK	1	0.998	10	535	543	9	1030.61	0h
sp|P13010|XRCC5_HUMAN	K.KASFEEASNQLINHIEQFLDTNETPYFMK.S	KASFEEASNQLINHIEQFLDTNETPYFMK	1	0.9989	9	606	634	29	3443.63	0h
sp|P13010|XRCC5_HUMAN	R.ANPQVGVAFPHIK.H	ANPQVGVAFPHIK	1	1	5	401	413	13	1376.75	0h
sp|P13010|XRCC5_HUMAN	K.ASFEEASNQLINHIEQFLDTNETPYFMK.S	ASFEEASNQLINHIEQFLDTNETPYFMK	1	1	15	607	634	28	3315.54	0h
sp|P13010|XRCC5_HUMAN	R.DDEAAAVALSSLIHALDDLDMVAIVR.Y	DDEAAAVALSSLIHALDDLDMVAIVR	1	1	9	369	394	26	2722.38	0h
sp|P13010|XRCC5_HUMAN	K.DKPSGDTAAVFEEGGDVDDLLDMI.-	DKPSGDTAAVFEEGGDVDDLLDMI	1	1	18	709	732	24	2508.12	0h
sp|P13010|XRCC5_HUMAN	X.DQVTAQEIFQDNHEDGPTAK.X	DQVTAQEIFQDNHEDGPTAK	1	1	2	546	565	20	2242.01	0h
sp|P13010|XRCC5_HUMAN	K.EEASGSSVTAEEAK.K	EEASGSSVTAEEAK	1	1	1	689	702	14	1393.62	0h
sp|P13010|XRCC5_HUMAN	K.EEASGSSVTAEEAKK.F	EEASGSSVTAEEAKK	1	1	15	689	703	15	1521.71	0h
sp|P13010|XRCC5_HUMAN	X.EPLPPIQQHIWNMLNPPAEVTTK.X	EPLPPIQQHIWNMLNPPAEVTTK	1	1	14	503	525	23	2652.37	0h
sp|P13010|XRCC5_HUMAN	R.HLMLPDFDLLEDIESK.I	HLMLPDFDLLEDIESK	2	1	18	82	97	16	1913.94	0h
sp|P13010|XRCC5_HUMAN	X.IQPGSQQADFLDALIVSMDVIQHETIGK.X	IQPGSQQADFLDALIVSMDVIQHETIGK	2	1	13	98	125	28	3052.55	0h
sp|P13010|XRCC5_HUMAN	K.KKDQVTAQEIFQDNHEDGPTAK.K	KKDQVTAQEIFQDNHEDGPTAK	1	1	16	544	565	22	2498.2	0h
sp|P13010|XRCC5_HUMAN	K.KYAPTEAQLNAVDALIDSMSLAK.K	KYAPTEAQLNAVDALIDSMSLAK	1	1	12	443	465	23	2448.25	0h
sp|P13010|XRCC5_HUMAN	R.LGGHGPSFPLK.G	LGGHGPSFPLK	1	1	5	185	195	11	1108.6	0h
sp|P13010|XRCC5_HUMAN	K.QLNHFWEIVVQDGITLITK.E	QLNHFWEIVVQDGITLITK	1	1	20	670	688	19	2253.21	0h
sp|P13010|XRCC5_HUMAN	K.TDTLEDLFPTTK.I	TDTLEDLFPTTK	1	1	4	470	481	12	1379.68	0h
sp|P13010|XRCC5_HUMAN	K.YAPTEAQLNAVDALIDSMSLAK.K	YAPTEAQLNAVDALIDSMSLAK	1	1	30	444	465	22	2320.16	0h
sp|P13073|COX41_HUMAN	K.SEDFSLPAYMDR.R	SEDFSLPAYMDR	1	0.9997	4	30	41	12	1429.62	0h
sp|P13073|COX41_HUMAN	R.DHPLPEVAHVK.H	DHPLPEVAHVK	1	1	16	43	53	11	1240.65	0h
sp|P13164|IFM1_HUMAN	K.MVGDVTGAQAYASTAK.C	MVGDVTGAQAYASTAK	6	1	3	68	83	16	1568.75	0h
sp|P13473|LAMP2_HUMAN	K.GILTVDELLAIR.I	GILTVDELLAIR	2	1	2	133	144	12	1311.78	0h
sp|P13473|LAMP2_HUMAN	R.IPLNDLFR.C	IPLNDLFR	2	1	15	145	152	8	986.554	0h
sp|P13473|LAMP2_HUMAN	K.YLDFVFAVK.N	YLDFVFAVK	3	1	12	281	289	9	1100.59	0h
sp|P13489|RINI_HUMAN	K.ELTVSNNDINEAGVR.V	ELTVSNNDINEAGVR	4	1	14	174	188	15	1629.8	0h
sp|P13489|RINI_HUMAN	R.VNPALAELNLR.S	VNPALAELNLR	7	1	1	54	64	11	1208.69	0h
sp|P13639|EF2_HUMAN	R.GGGQIIPTAR.R	GGGQIIPTAR	4	0.9042	1	717	726	10	968.539	0h
sp|P13639|EF2_HUMAN	R.IKPVLMMNK.M	IKPVLMMNK	2	0.9444	1	151	159	9	1072.61	0h
sp|P13639|EF2_HUMAN	X.PSQVVAETR.X	PSQVVAETR	2	0.9587	1	831	839	9	985.519	0h
sp|P13639|EF2_HUMAN	X.GVQYLNEIK.X	GVQYLNEIK	2	0.9748	1	668	676	9	1062.57	0h
sp|P13639|EF2_HUMAN	X.VNFTVDQIR.X	VNFTVDQIR	2	0.975	3	2	10	9	1090.58	0h
sp|P13639|EF2_HUMAN	K.FSVSPVVR.V	FSVSPVVR	1	0.9886	2	499	506	8	889.5	0h
sp|P13639|EF2_HUMAN	K.KSDPVVSYR.E	KSDPVVSYR	2	0.9989	5	572	580	9	1049.55	0h
sp|P13639|EF2_HUMAN	K.SDPVVSYR.E	SDPVVSYR	2	0.9998	1	573	580	8	921.454	0h
sp|P13639|EF2_HUMAN	K.TGTITTFEHAHNMR.V	TGTITTFEHAHNMR	1	0.9999	5	482	495	14	1614.76	0h
sp|P13639|EF2_HUMAN	R.ALLELQLEPEELYQTFQR.I	ALLELQLEPEELYQTFQR	2	1	23	163	180	18	2219.15	0h
sp|P13639|EF2_HUMAN	K.ARPFPDGLAEDIDKGEVSAR.Q	ARPFPDGLAEDIDKGEVSAR	2	1	29	606	625	20	2142.07	0h
sp|P13639|EF2_HUMAN	K.AYLPVNESFGFTADLR.S	AYLPVNESFGFTADLR	2	1	8	786	801	16	1798.89	0h
sp|P13639|EF2_HUMAN	X.DLEEDHACIPIKK.X	DLEEDHACIPIKK	2	1	1	560	572	13	1509.75	0h
sp|P13639|EF2_HUMAN	K.EDLYLKPIQR.T	EDLYLKPIQR	1	1	1	440	449	10	1273.7	0h
sp|P13639|EF2_HUMAN	K.EGIPALDNFLDK.L	EGIPALDNFLDK	2	1	6	846	857	12	1330.67	0h
sp|P13639|EF2_HUMAN	K.EGIPALDNFLDKL.-	EGIPALDNFLDKL	2	1	17	846	858	13	1443.76	0h
sp|P13639|EF2_HUMAN	K.GPLMMYISK.M	GPLMMYISK	1	1	13	392	400	9	1038.52	0h
sp|P13639|EF2_HUMAN	K.GVQYLNEIKDSVVAGFQWATK.E	GVQYLNEIKDSVVAGFQWATK	2	1	32	668	688	21	2352.21	0h
sp|P13639|EF2_HUMAN	K.IWCFGPDGTGPNILTDITK.G	IWCFGPDGTGPNILTDITK	2	1	3	649	667	19	2047.01	0h
sp|P13639|EF2_HUMAN	K.KEDLYLKPIQR.T	KEDLYLKPIQR	1	1	16	439	449	11	1401.8	0h
sp|P13639|EF2_HUMAN	R.KIWCFGPDGTGPNILTDITK.G	KIWCFGPDGTGPNILTDITK	2	1	6	648	667	20	2175.1	0h
sp|P13639|EF2_HUMAN	K.LDSEDKDKEGKPLLK.A	LDSEDKDKEGKPLLK	1	1	23	323	337	15	1713.91	0h
sp|P13639|EF2_HUMAN	R.LMEPIYLVEIQCPEQVVGGIYGVLNR.K	LMEPIYLVEIQCPEQVVGGIYGVLNR	2	1	2	740	765	26	2931.52	0h
sp|P13639|EF2_HUMAN	R.NMSVIAHVDHGK.S	NMSVIAHVDHGK	2	1	19	21	32	12	1306.64	0h
sp|P13639|EF2_HUMAN	R.RWLPAGDALLQMITIHLPSPVTAQK.Y	RWLPAGDALLQMITIHLPSPVTAQK	1	1	15	342	366	25	2755.52	0h
sp|P13639|EF2_HUMAN	X.STAISLFYELSENDLNFIK.X	STAISLFYELSENDLNFIK	2	1	15	72	90	19	2203.1	0h
sp|P13639|EF2_HUMAN	R.TFCQLILDPIFK.V	TFCQLILDPIFK	1	1	6	288	299	12	1436.77	0h
sp|P13639|EF2_HUMAN	X.VFDAIMNFKK.X	VFDAIMNFKK	1	1	15	300	309	10	1211.63	0h
sp|P13639|EF2_HUMAN	R.VFSGLVSTGLK.V	VFSGLVSTGLK	1	1	2	416	426	11	1106.63	0h
sp|P13639|EF2_HUMAN	R.WLPAGDALLQMITIHLPSPVTAQK.Y	WLPAGDALLQMITIHLPSPVTAQK	1	1	31	343	366	24	2599.42	0h
sp|P13639|EF2_HUMAN	R.YFDPANGK.F	YFDPANGK	1	1	5	265	272	8	910.416	0h
sp|P13639|EF2_HUMAN	R.YLAEKYEWDVAEAR.K	YLAEKYEWDVAEAR	2	1	10	634	647	14	1741.83	0h
sp|P13645|K1C10_HUMAN	K.VTMQNLNDR.L	VTMQNLNDR	20	0.9969	5	148	156	9	1089.52	0h
sp|P13645|K1C10_HUMAN	K.QSLEASLAETEGR.Y	QSLEASLAETEGR	6	0.9989	1	387	399	13	1389.67	0h
sp|P13645|K1C10_HUMAN	R.SQYEQLAEQNRK.D	SQYEQLAEQNRK	5	0.999	1	323	334	12	1492.73	0h
sp|P13645|K1C10_HUMAN	K.TIDDLKNQILNLTTDNANILLQIDNAR.L	TIDDLKNQILNLTTDNANILLQIDNAR	6	1	1	202	228	27	3051.62	0h
sp|P13647|K2C5_HUMAN	K.YEELQQTAGR.H	YEELQQTAGR	5	0.9855	1	365	374	10	1193.57	0h
sp|P13667|PDIA4_HUMAN	X.FAMEPEEFDSDTLREFVTAFK.X	FAMEPEEFDSDTLREFVTAFK	1	0.9095	1	486	506	21	2508.15	0h
sp|P13667|PDIA4_HUMAN	X.FDVSGYPTIK.X	FDVSGYPTIK	1	0.9613	5	132	141	10	1125.57	0h
sp|P13667|PDIA4_HUMAN	K.GRPYDYNGPR.E	GRPYDYNGPR	1	0.9866	3	261	270	10	1193.56	0h
sp|P13667|PDIA4_HUMAN	K.RSPPIPLAK.V	RSPPIPLAK	1	0.9868	1	226	234	9	977.601	0h
sp|P13667|PDIA4_HUMAN	K.YALPLVGHR.K	YALPLVGHR	1	0.9946	1	392	400	9	1024.58	0h
sp|P13667|PDIA4_HUMAN	K.FHHTFSTEIAK.F	FHHTFSTEIAK	1	0.996	1	336	346	11	1316.65	0h
sp|P13667|PDIA4_HUMAN	K.VEGFPTIYFAPSGDKK.N	VEGFPTIYFAPSGDKK	1	0.9966	1	597	612	16	1754.88	0h
sp|P13667|PDIA4_HUMAN	K.QLEPVYNSLAK.K	QLEPVYNSLAK	1	0.9972	3	560	570	11	1260.67	0h
sp|P13667|PDIA4_HUMAN	X.DGDDVIIIGVFK.X	DGDDVIIIGVFK	1	0.9976	2	302	313	12	1289.68	0h
sp|P13667|PDIA4_HUMAN	K.DKDPPIPVAK.I	DKDPPIPVAK	1	0.9991	8	110	119	10	1078.6	0h
sp|P13667|PDIA4_HUMAN	X.VDATAETDLAK.X	VDATAETDLAK	1	0.9991	2	235	245	11	1132.56	0h
sp|P13667|PDIA4_HUMAN	X.DLGLSESGEDVNAAILDESGKK.X	DLGLSESGEDVNAAILDESGKK	1	1	5	464	485	22	2246.09	0h
sp|P13667|PDIA4_HUMAN	R.EVSQPDWTPPPEVTLVLTK.E	EVSQPDWTPPPEVTLVLTK	1	1	15	166	184	19	2135.11	0h
sp|P13667|PDIA4_HUMAN	K.FAMEPEEFDSDTLR.E	FAMEPEEFDSDTLR	1	1	7	486	499	14	1685.72	0h
sp|P13667|PDIA4_HUMAN	K.KGQAVDYEGSR.T	KGQAVDYEGSR	1	1	1	145	155	11	1208.58	0h
sp|P13667|PDIA4_HUMAN	K.MDATANDVPSDR.Y	MDATANDVPSDR	1	1	12	583	594	12	1290.55	0h
sp|P13667|PDIA4_HUMAN	K.TFDSIVMDPK.K	TFDSIVMDPK	1	1	4	534	543	10	1151.55	0h
sp|P13667|PDIA4_HUMAN	X.VDATAETDLAKR.X	VDATAETDLAKR	1	1	5	235	246	12	1288.66	0h
sp|P13667|PDIA4_HUMAN	K.YGIVDYMIEQSGPPSK.E	YGIVDYMIEQSGPPSK	1	1	11	273	288	16	1782.85	0h
sp|P13674|P4HA1_HUMAN	K.GVAVDYLPER.Q	GVAVDYLPER	3	0.9932	1	277	286	10	1117.58	0h
sp|P13693|TCTP_HUMAN	R.TEGNIDDSLIGGNASAEGPEGEGTESTVITGVDIVMNHHLQETSFTK.E	TEGNIDDSLIGGNASAEGPEGEGTESTVITGVDIVMNHHLQETSFTK	5	0.9989	1	39	85	47	4856.26	0h
sp|P13693|TCTP_HUMAN	R.DLISHDEMFSDIYK.I	DLISHDEMFSDIYK	3	1	7	6	19	14	1711.77	0h
sp|P13727|PRG2_HUMAN	R.FQWVDGSR.W	FQWVDGSR	2	0.9732	1	172	179	8	993.465	0h
sp|P13727|PRG2_HUMAN	R.SLQTFSQAWFTCR.R	SLQTFSQAWFTCR	1	0.9992	1	114	126	13	1573.73	0h
sp|P13727|PRG2_HUMAN	R.GNLVSIHNFNINYR.I	GNLVSIHNFNINYR	2	1	10	131	144	14	1659.85	0h
sp|P13727|PRG2_HUMAN	R.RFQWVDGSR.W	RFQWVDGSR	2	1	7	171	179	9	1149.57	0h
sp|P13727|PRG2_HUMAN	R.SETSTFETPLGAK.T	SETSTFETPLGAK	2	1	13	21	33	13	1366.66	0h
sp|P13727|PRG2_HUMAN	R.WNFAYWAAHQPWSR.G	WNFAYWAAHQPWSR	2	1	20	180	193	14	1818.84	0h
sp|P13796|PLSL_HUMAN	X.AACLPLPGYR.X	AACLPLPGYR	3	0.9696	1	40	49	10	1059.55	0h
sp|P13796|PLSL_HUMAN	X.RYTLNILEEIGGGQK.X	RYTLNILEEIGGGQK	2	0.9831	1	501	515	15	1689.9	0h
sp|P13796|PLSL_HUMAN	X.SSSISSFKDPK.X	SSSISSFKDPK	2	0.9882	2	535	545	11	1181.59	0h
sp|P13796|PLSL_HUMAN	R.YPALHKPENQDIDWGALEGETREER.T	YPALHKPENQDIDWGALEGETREER	1	0.9888	1	374	398	25	2952.4	0h
sp|P13796|PLSL_HUMAN	X.TENLNDDEK.X	TENLNDDEK	2	0.9892	1	571	579	9	1076.46	0h
sp|P13796|PLSL_HUMAN	X.IKVPVDWNR.X	IKVPVDWNR	1	0.9999	14	433	441	9	1125.63	0h
sp|P13796|PLSL_HUMAN	R.ISFDEFIK.I	ISFDEFIK	2	0.9999	13	69	76	8	997.51	0h
sp|P13796|PLSL_HUMAN	R.QFVTATDVVR.G	QFVTATDVVR	1	0.9999	18	348	357	10	1134.6	0h
sp|P13796|PLSL_HUMAN	K.AYYHLLEQVAPK.G	AYYHLLEQVAPK	1	1	12	298	309	12	1430.75	0h
sp|P13796|PLSL_HUMAN	K.AYYHLLEQVAPKGDEEGVPAVVIDMSGLR.E	AYYHLLEQVAPKGDEEGVPAVVIDMSGLR	1	1	25	298	326	29	3155.59	0h
sp|P13796|PLSL_HUMAN	R.EGESLEDLMK.L	EGESLEDLMK	1	1	4	254	263	10	1149.52	0h
sp|P13796|PLSL_HUMAN	X.EGKPYLVLGLLWQVIK.X	EGKPYLVLGLLWQVIK	2	1	5	218	233	16	1855.09	0h
sp|P13796|PLSL_HUMAN	R.EITENLMATGDLDQDGR.I	EITENLMATGDLDQDGR	2	1	13	52	68	17	1876.85	0h
sp|P13796|PLSL_HUMAN	K.FSLVGIGGQDLNEGNR.T	FSLVGIGGQDLNEGNR	2	1	15	473	488	16	1674.83	0h
sp|P13796|PLSL_HUMAN	K.GDEEGVPAVVIDMSGLR.E	GDEEGVPAVVIDMSGLR	1	1	5	310	326	17	1742.85	0h
sp|P13796|PLSL_HUMAN	R.GSVSDEEMMELR.E	GSVSDEEMMELR	3	1	7	4	15	12	1381.58	0h
sp|P13796|PLSL_HUMAN	K.IGLFADIELSR.N	IGLFADIELSR	5	1	16	234	244	11	1232.67	0h
sp|P13796|PLSL_HUMAN	K.IGNFSTDIK.D	IGNFSTDIK	1	1	12	286	294	9	993.511	0h
sp|P13796|PLSL_HUMAN	X.IGNFSTDIKDSK.X	IGNFSTDIKDSK	1	1	9	286	297	12	1323.66	0h
sp|P13796|PLSL_HUMAN	K.ISTSLPVLDLIDAIQPGSINYDLLK.T	ISTSLPVLDLIDAIQPGSINYDLLK	2	1	31	546	570	25	2697.48	0h
sp|P13796|PLSL_HUMAN	K.LNLAFIANLFNR.Y	LNLAFIANLFNR	1	1	31	362	373	12	1404.79	0h
sp|P13796|PLSL_HUMAN	K.LSPEELLLR.W	LSPEELLLR	6	1	5	264	272	9	1068.62	0h
sp|P13796|PLSL_HUMAN	X.MINLSVPDTIDER.X	MINLSVPDTIDER	5	1	9	166	178	13	1501.74	0h
sp|P13796|PLSL_HUMAN	K.MVMTVFACLMGK.G	MVMTVFACLMGK	3	1	15	611	622	12	1329.63	0h
sp|P13796|PLSL_HUMAN	R.NEALIALLR.E	NEALIALLR	1	1	15	245	253	9	1011.61	0h
sp|P13796|PLSL_HUMAN	R.NWMNSLGVNPR.V	NWMNSLGVNPR	1	1	5	402	412	11	1286.62	0h
sp|P13796|PLSL_HUMAN	K.TENLNDDEKLNNAK.Y	TENLNDDEKLNNAK	2	1	28	571	584	14	1616.76	0h
sp|P13796|PLSL_HUMAN	R.TLTLALIWQLMR.R	TLTLALIWQLMR	2	1	36	489	500	12	1457.84	0h
sp|P13796|PLSL_HUMAN	K.VDTDGNGYISFNELNDLFK.A	VDTDGNGYISFNELNDLFK	3	1	15	21	39	19	2160	0h
sp|P13796|PLSL_HUMAN	K.VNDDIIVNWVNETLR.E	VNDDIIVNWVNETLR	2	1	19	516	530	15	1798.92	0h
sp|P13796|PLSL_HUMAN	R.VNHLYSDLSDALVIFQLYEK.I	VNHLYSDLSDALVIFQLYEK	1	1	18	413	432	20	2366.21	0h
sp|P13796|PLSL_HUMAN	R.VYALPEDLVEVNPK.M	VYALPEDLVEVNPK	2	1	12	597	610	14	1584.84	0h
sp|P13796|PLSL_HUMAN	K.YAFVNWINK.A	YAFVNWINK	5	1	10	124	132	9	1153.59	0h
sp|P13796|PLSL_HUMAN	R.YPALHKPENQDIDWGALEGETR.E	YPALHKPENQDIDWGALEGETR	1	1	20	374	395	22	2538.21	0h
sp|P13796|PLSL_HUMAN	R.YTLNILEEIGGGQK.V	YTLNILEEIGGGQK	2	1	10	502	515	14	1533.8	0h
sp|P13798|ACPH_HUMAN	R.TVHTEWTQR.D	TVHTEWTQR	2	0.9366	1	45	53	9	1156.56	0h
sp|P13798|ACPH_HUMAN	K.VGFLPSAGK.E	VGFLPSAGK	2	0.9992	4	435	443	9	874.488	0h
sp|P13798|ACPH_HUMAN	K.TPLLLMLGQEDR.R	TPLLLMLGQEDR	2	1	5	665	676	12	1384.74	0h
sp|P13804|ETFA_HUMAN	X.LLYDLADQLHAAVGASR.X	LLYDLADQLHAAVGASR	3	0.9041	1	233	249	17	1811.95	0h
sp|P13804|ETFA_HUMAN	K.IVAPELYIAVGISGAIQHLAGMKDSK.T	IVAPELYIAVGISGAIQHLAGMKDSK	3	0.9987	1	269	294	26	2680.46	0h
sp|P13804|ETFA_HUMAN	K.VLVAQHDVYK.G	VLVAQHDVYK	3	0.9992	1	76	85	10	1170.64	0h
sp|P13804|ETFA_HUMAN	R.AAVDAGFVPNDMQVGQTGK.I	AAVDAGFVPNDMQVGQTGK	3	1	10	250	268	19	1903.91	0h
sp|P13804|ETFA_HUMAN	K.ASSTSPVEISEWLDQK.L	ASSTSPVEISEWLDQK	3	1	2	188	203	16	1775.86	0h
sp|P13804|ETFA_HUMAN	K.IVAPELYIAVGISGAIQHLAGMK.D	IVAPELYIAVGISGAIQHLAGMK	3	1	14	269	291	23	2350.3	0h
sp|P13804|ETFA_HUMAN	K.LEVAPISDIIAIK.S	LEVAPISDIIAIK	3	1	5	127	139	13	1380.82	0h
sp|P13804|ETFA_HUMAN	K.TIVAINKDPEAPIFQVADYGIVADLFK.V	TIVAINKDPEAPIFQVADYGIVADLFK	3	1	15	295	321	27	2946.57	0h
sp|P13929|ENOB_HUMAN	X.DATNVGDEGGFAPNILENNEALELLK.X	DATNVGDEGGFAPNILENNEALELLK	4	0.9963	2	203	228	26	2742.33	0h
sp|P13929|ENOB_HUMAN	X.VNQIGSVTESIQACK.X	VNQIGSVTESIQACK	3	1	15	344	358	15	1575.79	0h
sp|P13995|MTDC_HUMAN	K.AGYITPVPGGVGPMTVAMLMK.N	AGYITPVPGGVGPMTVAMLMK	4	0.9709	1	302	322	21	2089.07	0h
sp|P13995|MTDC_HUMAN	R.QEVEEWVASGNK.R	QEVEEWVASGNK	3	0.9963	1	55	66	12	1374.64	0h
sp|P13995|MTDC_HUMAN	R.AAAVVGINSETIMKPASISEEELLNLINK.L	AAAVVGINSETIMKPASISEEELLNLINK	1	1	4	91	119	29	3053.63	0h
sp|P13995|MTDC_HUMAN	K.HTILADIVISAAGIPNLITADMIK.E	HTILADIVISAAGIPNLITADMIK	3	1	15	243	266	24	2489.39	0h
sp|P13995|MTDC_HUMAN	R.VHDPVTAKPK.L	VHDPVTAKPK	3	1	4	279	288	10	1090.61	0h
sp|P14174|MIF_HUMAN	R.VYINYYDMNAANVGWNNSTFA.-	VYINYYDMNAANVGWNNSTFA	1	0.9992	6	95	115	21	2426.06	0h
sp|P14174|MIF_HUMAN	X.PMFIVNTNVPR.X	PMFIVNTNVPR	1	0.9998	16	2	12	11	1286.68	0h
sp|P14314|GLU2B_HUMAN	X.LIELQAGKK.X	LIELQAGKK	3	0.9039	1	159	167	9	998.61	0h
sp|P14314|GLU2B_HUMAN	R.NKFEEAER.S	NKFEEAER	3	0.9906	1	375	382	8	1021.48	0h
sp|P14314|GLU2B_HUMAN	K.KLIELQAGKK.S	KLIELQAGKK	3	0.9991	3	158	167	10	1126.7	0h
sp|P14314|GLU2B_HUMAN	K.LWEEQLAAAK.A	LWEEQLAAAK	3	0.9999	8	197	206	10	1157.61	0h
sp|P14314|GLU2B_HUMAN	R.TVKEEAEKPER.E	TVKEEAEKPER	3	0.9999	14	178	188	11	1314.68	0h
sp|P14314|GLU2B_HUMAN	K.AQQEQELAADAFK.E	AQQEQELAADAFK	3	1	15	207	219	13	1447.69	0h
sp|P14314|GLU2B_HUMAN	R.ESLQQMAEVTR.E	ESLQQMAEVTR	3	1	9	125	135	11	1290.62	0h
sp|P14314|GLU2B_HUMAN	K.ETMVTSTTEPSR.C	ETMVTSTTEPSR	3	1	21	488	499	12	1337.61	0h
sp|P14314|GLU2B_HUMAN	K.KILIEDWK.K	KILIEDWK	3	1	1	142	149	8	1043.6	0h
sp|P14314|GLU2B_HUMAN	K.LGGSPTSLGTWGSWIGPDHDK.F	LGGSPTSLGTWGSWIGPDHDK	3	1	1	439	459	21	2167.03	0h
sp|P14314|GLU2B_HUMAN	K.LGGSPTSLGTWGSWIGPDHDKFSAMK.Y	LGGSPTSLGTWGSWIGPDHDKFSAMK	3	1	18	439	464	26	2731.3	0h
sp|P14314|GLU2B_HUMAN	K.SLEDQVEMLR.T	SLEDQVEMLR	3	1	4	168	177	10	1218.59	0h
sp|P14317|HCLS1_HUMAN	X.TEHINIHQLR.X	TEHINIHQLR	3	0.9991	9	49	58	10	1259.67	0h
sp|P14317|HCLS1_HUMAN	R.EHPVPLLPIR.Q	EHPVPLLPIR	2	1	1	322	331	10	1169.69	0h
sp|P14317|HCLS1_HUMAN	X.KISSEAWPPVGTPPSSESEPVR.X	KISSEAWPPVGTPPSSESEPVR	2	1	7	297	318	22	2336.16	0h
sp|P14317|HCLS1_HUMAN	K.RSPEAPQPVIAMEEPAVPAPLPK.K	RSPEAPQPVIAMEEPAVPAPLPK	2	1	7	274	296	23	2423.29	0h
sp|P14317|HCLS1_HUMAN	K.SAVGFNEMEAPTTAYK.K	SAVGFNEMEAPTTAYK	2	1	11	208	223	16	1714.79	0h
sp|P14317|HCLS1_HUMAN	X.SAVGFNEMEAPTTAYKK.X	SAVGFNEMEAPTTAYKK	2	1	1	208	224	17	1842.88	0h
sp|P14317|HCLS1_HUMAN	K.SAVGHEYVAEVEK.H	SAVGHEYVAEVEK	3	1	6	97	109	13	1416.69	0h
sp|P14317|HCLS1_HUMAN	R.SPEAPQPVIAMEEPAVPAPLPK.K	SPEAPQPVIAMEEPAVPAPLPK	2	1	1	275	296	22	2267.19	0h
sp|P14324|FPPS_HUMAN	K.IGTDIQDNK.C	IGTDIQDNK	2	0.9988	1	324	332	9	1002.5	0h
sp|P14324|FPPS_HUMAN	K.QDFVQHFSQIVR.V	QDFVQHFSQIVR	2	1	15	81	92	12	1502.76	0h
sp|P14324|FPPS_HUMAN	R.VLTEDEMGHPEIGDAIAR.L	VLTEDEMGHPEIGDAIAR	2	1	18	93	110	18	1951.93	0h
sp|P14550|AK1A1_HUMAN	X.DAGHPLYPFNDPY.X	DAGHPLYPFNDPY	1	0.9505	1	313	325	13	1504.66	0h
sp|P14550|AK1A1_HUMAN	X.YIVPMLTVDGK.X	YIVPMLTVDGK	1	0.9953	6	298	308	11	1234.66	0h
sp|P14618|KPYM_HUMAN	X.GDVVIVLTGWRPGSGFTNTMR.X	GDVVIVLTGWRPGSGFTNTMR	5	0.9031	1	506	526	21	2262.15	0h
sp|P14618|KPYM_HUMAN	R.LDIDSPPITAR.N	LDIDSPPITAR	3	0.9861	1	33	43	11	1196.64	0h
sp|P14618|KPYM_HUMAN	X.QKGADFLVTEVENGGSLGSK.X	QKGADFLVTEVENGGSLGSK	4	0.996	1	187	206	20	2035.02	0h
sp|P14618|KPYM_HUMAN	K.IENHEGVR.R	IENHEGVR	5	0.9986	9	271	278	8	952.472	0h
sp|P14618|KPYM_HUMAN	X.GVNLPGAAVDLPAVSEKDIQDLK.X	GVNLPGAAVDLPAVSEKDIQDLK	5	0.9991	3	208	230	23	2348.26	0h
sp|P14618|KPYM_HUMAN	R.AEGSDVANAVLDGADCIMLSGETAK.G	AEGSDVANAVLDGADCIMLSGETAK	5	1	6	343	367	25	2436.11	0h
sp|P14618|KPYM_HUMAN	R.AGKPVICATQMLESMIK.K	AGKPVICATQMLESMIK	5	1	9	320	336	17	1818.94	0h
sp|P14618|KPYM_HUMAN	R.APIIAVTR.N	APIIAVTR	5	1	13	448	455	8	839.522	0h
sp|P14618|KPYM_HUMAN	K.DPVQEAWAEDVDLR.V	DPVQEAWAEDVDLR	5	1	6	476	489	14	1641.76	0h
sp|P14618|KPYM_HUMAN	R.EAEAAIYHLQLFEELR.R	EAEAAIYHLQLFEELR	3	1	13	384	399	16	1930.98	0h
sp|P14618|KPYM_HUMAN	K.FGVEQDVDMVFASFIR.K	FGVEQDVDMVFASFIR	5	1	119	231	246	16	1858.89	0h
sp|P14618|KPYM_HUMAN	K.GADFLVTEVENGGSLGSK.K	GADFLVTEVENGGSLGSK	4	1	21	189	206	18	1778.87	0h
sp|P14618|KPYM_HUMAN	R.GDLGIEIPAEK.V	GDLGIEIPAEK	9	1	15	295	305	11	1140.6	0h
sp|P14618|KPYM_HUMAN	K.GSGTAEVELKK.G	GSGTAEVELKK	2	1	1	126	136	11	1117.6	0h
sp|P14618|KPYM_HUMAN	K.GVNLPGAAVDLPAVSEK.D	GVNLPGAAVDLPAVSEK	5	1	11	208	224	17	1635.88	0h
sp|P14618|KPYM_HUMAN	X.ITLDNAYMEK.X	ITLDNAYMEK	4	1	5	142	151	10	1196.57	0h
sp|P14618|KPYM_HUMAN	K.IYVDDGLISLQVK.Q	IYVDDGLISLQVK	4	1	9	174	186	13	1461.81	0h
sp|P14618|KPYM_HUMAN	K.KGVNLPGAAVDLPAVSEK.D	KGVNLPGAAVDLPAVSEK	5	1	7	207	224	18	1763.97	0h
sp|P14618|KPYM_HUMAN	K.KGVNLPGAAVDLPAVSEKDIQDLK.F	KGVNLPGAAVDLPAVSEKDIQDLK	5	1	18	207	230	24	2476.35	0h
sp|P14618|KPYM_HUMAN	R.LAPITSDPTEATAVGAVEASFK.C	LAPITSDPTEATAVGAVEASFK	3	1	15	401	422	22	2174.11	0h
sp|P14618|KPYM_HUMAN	R.LNFSHGTHEYHAETIK.N	LNFSHGTHEYHAETIK	2	1	18	74	89	16	1882.89	0h
sp|P14618|KPYM_HUMAN	R.NTGIICTIGPASR.S	NTGIICTIGPASR	3	1	5	44	56	13	1301.67	0h
sp|P14618|KPYM_HUMAN	X.RFDEILEASDGIMVAR.X	RFDEILEASDGIMVAR	5	1	7	279	294	16	1820.91	0h
sp|P14618|KPYM_HUMAN	R.TATESFASDPILYRPVAVALDTK.G	TATESFASDPILYRPVAVALDTK	2	1	24	93	115	23	2464.28	0h
sp|P14618|KPYM_HUMAN	R.VNFAMNVGK.A	VNFAMNVGK	5	1	6	490	498	9	978.492	0h
sp|P14625|ENPL_HUMAN	K.FAFQAEVNR.M	FAFQAEVNR	1	0.9963	2	76	84	9	1080.53	0h
sp|P14625|ENPL_HUMAN	K.SGTSEFLNK.M	SGTSEFLNK	1	0.9963	2	169	177	9	981.475	0h
sp|P14625|ENPL_HUMAN	X.NLLHVTDTGVGMTREELVK.X	NLLHVTDTGVGMTREELVK	1	0.9973	3	143	161	19	2111.1	0h
sp|P14625|ENPL_HUMAN	R.IKEDEDDKTVLDLAVVLFETATLR.S	IKEDEDDKTVLDLAVVLFETATLR	2	0.9976	10	701	724	24	2732.45	0h
sp|P14625|ENPL_HUMAN	K.TVWDWELMNDIKPIWQRPSK.E	TVWDWELMNDIKPIWQRPSK	2	0.9985	18	329	348	20	2541.28	0h
sp|P14625|ENPL_HUMAN	K.EFEPLLNWMK.D	EFEPLLNWMK	2	0.9992	10	614	623	10	1305.64	0h
sp|P14625|ENPL_HUMAN	K.LIINSLYK.N	LIINSLYK	1	0.9992	12	88	95	8	962.578	0h
sp|P14625|ENPL_HUMAN	X.EAVEKEFEPLLNWMK.X	EAVEKEFEPLLNWMK	2	0.9993	9	609	623	15	1861.93	0h
sp|P14625|ENPL_HUMAN	K.DISTNYYASQK.K	DISTNYYASQK	2	1	14	672	682	11	1288.59	0h
sp|P14625|ENPL_HUMAN	K.DISTNYYASQKK.T	DISTNYYASQKK	2	1	3	672	683	12	1416.69	0h
sp|P14625|ENPL_HUMAN	K.EEASDYLELDTIK.N	EEASDYLELDTIK	1	1	7	253	265	13	1524.72	0h
sp|P14625|ENPL_HUMAN	K.EVEEDEYKAFYK.S	EVEEDEYKAFYK	2	1	2	349	360	12	1548.7	0h
sp|P14625|ENPL_HUMAN	R.FQSSHHPTDITSLDQYVER.M	FQSSHHPTDITSLDQYVER	2	1	16	512	530	19	2259.06	0h
sp|P14625|ENPL_HUMAN	K.GVVDSDDLPLNVSR.E	GVVDSDDLPLNVSR	2	1	11	435	448	14	1484.74	0h
sp|P14625|ENPL_HUMAN	X.IADDKYNDTFWK.X	IADDKYNDTFWK	2	1	1	475	486	12	1514.7	0h
sp|P14625|ENPL_HUMAN	K.KYSQFINFPIYVWSSK.T	KYSQFINFPIYVWSSK	1	1	5	270	285	16	2006.03	0h
sp|P14625|ENPL_HUMAN	K.LGVIEDHSNR.T	LGVIEDHSNR	3	1	25	494	503	10	1138.57	0h
sp|P14625|ENPL_HUMAN	R.LISLTDENALSGNEELTVK.I	LISLTDENALSGNEELTVK	1	1	8	117	135	19	2045.05	0h
[truncated: 5,451 more rows]

## Sheet: 3h 3bio
protein	peptide_w_cleav	peptide	multiple_proteins	max_ID_probability	number_spectra	start	stop	length	MImass	condition
contam_gi|105815|pir||A34720	X.LALDIEIATYR.X	LALDIEIATYR	21	0.9982	1	382	392	11	1276.7	3h
contam_gi|106849|pir||PC1102	X.IRLENEIQTYR.X	IRLENEIQTYR	6	0.9918	5	244	254	11	1433.76	3h
contam_gi|106849|pir||PC1102	X.VLDELTLTK.X	VLDELTLTK	5	0.996	4	62	70	9	1030.59	3h
contam_gi|106849|pir||PC1102	X.LKYENEVALR.X	LKYENEVALR	6	1	6	40	49	10	1233.67	3h
contam_gi|106849|pir||PC1102	X.NHEEEMKDLR.X	NHEEEMKDLR	5	1	2	90	99	10	1299.59	3h
contam_gi|106849|pir||PC1102	X.NQILNLTTDNANILLQIDNAR.X	NQILNLTTDNANILLQIDNAR	6	1	10	12	32	21	2366.26	3h
contam_gi|106849|pir||PC1102	X.NVQALEIELQSQLALK.X	NVQALEIELQSQLALK	5	1	8	175	190	16	1796	3h
contam_gi|106849|pir||PC1102	X.SKELTTEIDNNIEQISSYK.X	SKELTTEIDNNIEQISSYK	6	1	5	148	166	19	2211.09	3h
contam_gi|1082558|pir||S41161	X.DQIVDLTVGNNKTLLDIDNTR.X	DQIVDLTVGNNKTLLDIDNTR	4	0.9335	3	213	233	21	2356.22	3h
contam_gi|1082558|pir||S41161	X.QVLDNLTMEK.X	QVLDNLTMEK	4	0.9963	3	262	271	10	1189.6	3h
contam_gi|1082558|pir||S41161	X.HGVQELEIELQSQLSK.X	HGVQELEIELQSQLSK	3	1	4	375	390	16	1836.96	3h
contam_gi|1082558|pir||S41161	X.NYSPYYNTIDDLKDQIVDLTVGNNK.X	NYSPYYNTIDDLKDQIVDLTVGNNK	4	1	9	200	224	25	2901.4	3h
contam_gi|1082558|pir||S41161	X.SGGGGGGGLGSGGSIR.X	SGGGGGGGLGSGGSIR	2	1	5	14	29	16	1231.59	3h
contam_gi|1082558|pir||S41161	X.VQALEEANNDLENK.X	VQALEEANNDLENK	4	1	4	171	184	14	1585.76	3h
contam_gi|125098|sp|P12035|K2C3_HUMAN	X.LALDVEIATYR.X	LALDVEIATYR	30	0.9985	1	493	503	11	1262.69	3h
contam_gi|1346343|sp|P04264|K2C1_HUMAN	X.SLDLDSIIAEVK.X	SLDLDSIIAEVK	2	0.9953	2	344	355	12	1301.71	3h
contam_gi|1346343|sp|P04264|K2C1_HUMAN	X.IEISELNR.X	IEISELNR	7	0.9974	3	396	403	8	972.524	3h
contam_gi|1346343|sp|P04264|K2C1_HUMAN	X.AEAESLYQSK.X	AEAESLYQSK	4	1	5	367	376	10	1124.53	3h
contam_gi|1346343|sp|P04264|K2C1_HUMAN	X.FLEQQNQVLQTK.X	FLEQQNQVLQTK	7	1	13	200	211	12	1474.78	3h
contam_gi|1346343|sp|P04264|K2C1_HUMAN	X.GSGGGSSGGSIGGR.X	GSGGGSSGGSIGGR	2	1	2	603	616	14	1091.49	3h
contam_gi|1346343|sp|P04264|K2C1_HUMAN	X.GSYGSGGSSYGSGGGSYGSGGGGGGHGSYGSGSSSGGYR.X	GSYGSGGSSYGSGGGSYGSGGGGGGHGSYGSGSSSGGYR	2	1	5	550	588	39	3311.29	3h
contam_gi|1346343|sp|P04264|K2C1_HUMAN	X.LNDLEDALQQAK.X	LNDLEDALQQAK	3	1	5	444	455	12	1356.69	3h
contam_gi|1346343|sp|P04264|K2C1_HUMAN	X.MSGECAPNVSVSVSTSHTTISGGGSR.X	MSGECAPNVSVSVSTSHTTISGGGSR	2	1	10	493	518	26	2507.14	3h
contam_gi|1346343|sp|P04264|K2C1_HUMAN	X.NKLNDLEDALQQAK.X	NKLNDLEDALQQAK	3	1	6	442	455	14	1598.83	3h
contam_gi|1346343|sp|P04264|K2C1_HUMAN	X.NMQDMVEDYR.X	NMQDMVEDYR	4	1	1	258	267	10	1299.52	3h
contam_gi|1346343|sp|P04264|K2C1_HUMAN	X.TNAENEFVTIKK.X	TNAENEFVTIKK	4	1	8	278	289	12	1392.72	3h
contam_gi|1346344|sp|P02538|K2CA_HUMAN	X.AQYEEIAQR.X	AQYEEIAQR	22	1	2	339	347	9	1106.54	3h
contam_gi|254622|bbs|112352	X.VLYDAEISQIHQSVTDTNVILSMDNSR.X	VLYDAEISQIHQSVTDTNVILSMDNSR	3	1	5	321	347	27	3047.49	3h
sp|A0AVT1|UBA6_HUMAN	R.YVLGDTAMQK.M	YVLGDTAMQK	1	0.9041	1	49	58	10	1124.55	3h
sp|A0AVT1|UBA6_HUMAN	X.DGSLFWQSPK.X	DGSLFWQSPK	1	0.9545	1	730	739	10	1163.56	3h
sp|A0AVT1|UBA6_HUMAN	K.MLYVPVMPGHAK.R	MLYVPVMPGHAK	1	0.9884	1	992	1003	12	1341.69	3h
sp|A0AVT1|UBA6_HUMAN	K.QDVIITALDNVEAR.R	QDVIITALDNVEAR	1	0.9987	2	561	574	14	1555.82	3h
sp|A0AVT1|UBA6_HUMAN	K.EDFTLLDFINAVK.E	EDFTLLDFINAVK	1	0.9999	1	964	976	13	1523.79	3h
sp|A0FGR8|ESYT2_HUMAN	X.ALALLEDEER.X	ALALLEDEER	1	0.9873	1	163	172	10	1157.59	3h
sp|A0FGR8|ESYT2_HUMAN	R.LLDEWFTLDEVPK.G	LLDEWFTLDEVPK	2	1	6	484	496	13	1603.81	3h
sp|A1L0T0|ILVBL_HUMAN	X.LGLFYQLLHK.X	LGLFYQLLHK	5	0.9948	1	36	45	10	1230.71	3h
sp|A2RRP1|NBAS_HUMAN	K.LLGLAELLR.V	LLGLAELLR	1	0.9992	4	1262	1270	9	996.632	3h
sp|A3KN83|SBNO1_HUMAN	X.ILGMEVHQQNALFQYFADTLTAVVQNAK.X	ILGMEVHQQNALFQYFADTLTAVVQNAK	1	1	2	1110	1137	28	3148.6	3h
sp|A4D2P6|GRD2I_HUMAN	X.MMSAVYAELESRLNSSFK.X	MMSAVYAELESRLNSSFK	4	0.99	2	551	568	18	2061.98	3h
sp|A5A3E0|POTEF_HUMAN	X.AVFPSIVGRPR.X	AVFPSIVGRPR	24	0.9985	21	729	739	11	1197.7	3h
sp|A5A3E0|POTEF_HUMAN	X.AGFAGDDAPR.X	AGFAGDDAPR	25	1	33	719	728	10	975.439	3h
sp|A5A3E0|POTEF_HUMAN	X.IWHHTFYNELR.X	IWHHTFYNELR	17	1	36	785	795	11	1514.74	3h
sp|A5A3E0|POTEF_HUMAN	X.SYELPDGQVITIGNER.X	SYELPDGQVITIGNER	17	1	61	939	954	16	1789.88	3h
sp|A5YKK6|CNOT1_HUMAN	X.SLDLIESLLR.X	SLDLIESLLR	1	0.9963	1	450	459	10	1157.66	3h
sp|A5YKK6|CNOT1_HUMAN	K.APGFVYAWLELISHR.I	APGFVYAWLELISHR	2	1	2	2031	2045	15	1757.92	3h
sp|A6NDG6|PGP_HUMAN	K.TILTLTGVSTLGDVK.N	TILTLTGVSTLGDVK	1	1	1	276	290	15	1516.87	3h
sp|A6NEC2|PSAL_HUMAN	R.VALSNMNVIDR.K	VALSNMNVIDR	5	1	1	211	221	11	1230.64	3h
sp|A6NHG4|DDTL_HUMAN	X.PFLELDTNLPANR.X	PFLELDTNLPANR	5	1	5	2	14	13	1498.78	3h
sp|A6NHR9|SMHD1_HUMAN	X.LTFMDLELK.X	LTFMDLELK	1	0.9986	1	526	534	9	1108.58	3h
sp|A6NHR9|SMHD1_HUMAN	K.LYFKPIGDPVFAR.D	LYFKPIGDPVFAR	1	0.999	2	1799	1811	13	1521.83	3h
sp|A6NHR9|SMHD1_HUMAN	X.LLLIDWPELK.X	LLLIDWPELK	1	0.9993	8	1257	1266	10	1238.73	3h
sp|A6NHR9|SMHD1_HUMAN	K.FSFGLLDLPFR.V	FSFGLLDLPFR	1	1	12	826	836	11	1310.7	3h
sp|A6NHR9|SMHD1_HUMAN	K.GSNEEDTDTPLFIGK.V	GSNEEDTDTPLFIGK	1	1	1	1543	1557	15	1621.75	3h
sp|A6NHR9|SMHD1_HUMAN	K.SLFEASQQLLNEMK.C	SLFEASQQLLNEMK	1	1	1	1642	1655	14	1636.81	3h
sp|A6NIZ1|RP1BL_HUMAN	X.VKDTDDVPMILVGNK.X	VKDTDDVPMILVGNK	4	1	20	103	117	15	1642.86	3h
sp|A6NK07|IF2BL_HUMAN	X.EVEPEPTEDKDLEADEEDTR.X	EVEPEPTEDKDLEADEEDTR	3	0.999	1	43	62	20	2345.01	3h
sp|A6NKZ8|YI016_HUMAN	X.IREEYPDR.X	IREEYPDR	14	0.9898	2	83	90	8	1076.53	3h
sp|A6NKZ8|YI016_HUMAN	X.KLAVNMVPFPR.X	KLAVNMVPFPR	22	1	3	180	190	11	1270.72	3h
sp|A6NKZ8|YI016_HUMAN	X.LHFFMPGFAPLTSR.X	LHFFMPGFAPLTSR	19	1	33	191	204	14	1619.83	3h
sp|A8K0Z3|WASH1_HUMAN	K.QQQKEQEQVR.A	QQQKEQEQVR	2	0.9992	2	391	400	10	1299.65	3h
sp|A8MUU1|FB5L3_HUMAN	X.TQTVCNFTDGALVQHQEWDGK.X	TQTVCNFTDGALVQHQEWDGK	3	0.9993	2	49	69	21	2376.08	3h
sp|A8MW06|TMSL3_HUMAN	K.KTETQEKNPLPSK.E	KTETQEKNPLPSK	4	1	5	20	32	13	1498.8	3h
sp|A8MW06|TMSL3_HUMAN	K.NPLPSKETIEQEK.Q	NPLPSKETIEQEK	5	1	10	27	39	13	1511.78	3h
sp|A8MW06|TMSL3_HUMAN	K.TETQEKNPLPSK.E	TETQEKNPLPSK	4	1	24	21	32	12	1370.7	3h
sp|A8MW06|TMSL3_HUMAN	K.TETQEKNPLPSKETIEQEK.Q	TETQEKNPLPSKETIEQEK	4	1	7	21	39	19	2228.12	3h
sp|A8MWD9|RUXGL_HUMAN	R.GNSIIMLEALER.V	GNSIIMLEALER	4	1	4	64	75	12	1344.71	3h
sp|B0I1T2|MYO1G_HUMAN	X.LFEWVVNR.X	LFEWVVNR	1	0.9776	1	363	370	8	1061.56	3h
sp|B0I1T2|MYO1G_HUMAN	X.LIPIIVLLLQK.X	LIPIIVLLLQK	1	0.9985	1	709	719	11	1261.87	3h
sp|B0I1T2|MYO1G_HUMAN	R.AMWPDGQQDITEVTK.R	AMWPDGQQDITEVTK	1	1	5	557	571	15	1717.8	3h
sp|B0I1T2|MYO1G_HUMAN	K.EGLAVAEEALVDHVAELTATPR.D	EGLAVAEEALVDHVAELTATPR	1	1	4	298	319	22	2290.18	3h
sp|B0I1T2|MYO1G_HUMAN	K.GHTAAEASYAR.D	GHTAAEASYAR	1	1	2	342	352	11	1132.53	3h
sp|B0I1T2|MYO1G_HUMAN	K.NSMVALVENLASK.E	NSMVALVENLASK	1	1	1	582	594	13	1374.71	3h
sp|B0I1T2|MYO1G_HUMAN	K.VAAMGALQGLR.Q	VAAMGALQGLR	1	1	2	816	826	11	1085.6	3h
sp|B2RPK0|HGB1A_HUMAN	X.FKDPNAPK.X	FKDPNAPK	7	0.9883	2	89	96	8	915.479	3h
sp|B2RPK0|HGB1A_HUMAN	X.GEHPGLSIGDVAK.X	GEHPGLSIGDVAK	5	1	17	115	127	13	1278.65	3h
sp|B2RPK0|HGB1A_HUMAN	X.IKGEHPGLSIGDVAK.X	IKGEHPGLSIGDVAK	5	1	18	113	127	15	1519.83	3h
sp|O00116|ADAS_HUMAN	K.ESISDVGFGMLK.S	ESISDVGFGMLK	2	0.9992	4	629	640	12	1281.62	3h
sp|O00116|ADAS_HUMAN	K.NIYGNIEDLVVHIK.M	NIYGNIEDLVVHIK	1	1	2	324	337	14	1625.88	3h
sp|O00148|DX39A_HUMAN	K.GLAITFVSDENDAK.I	GLAITFVSDENDAK	3	0.9336	1	384	397	14	1478.72	3h
sp|O00148|DX39A_HUMAN	X.DFLLKPELLR.X	DFLLKPELLR	30	0.9964	11	48	57	10	1242.73	3h
sp|O00148|DX39A_HUMAN	R.FEVNVAELPEEIDISTYIEQSR.-	FEVNVAELPEEIDISTYIEQSR	1	1	4	406	427	22	2580.26	3h
sp|O00148|DX39A_HUMAN	K.FMQDPMEVFVDDETK.L	FMQDPMEVFVDDETK	2	1	3	241	255	15	1829.78	3h
sp|O00148|DX39A_HUMAN	K.GSYVSIHSSGFR.D	GSYVSIHSSGFR	73	1	5	36	47	12	1295.62	3h
sp|O00148|DX39A_HUMAN	X.LTLHGLQQYYVK.X	LTLHGLQQYYVK	21	1	9	256	267	12	1461.8	3h
sp|O00148|DX39A_HUMAN	K.MLEQLDMR.R	MLEQLDMR	42	1	8	200	207	8	1034.49	3h
sp|O00148|DX39A_HUMAN	X.VNIVFNYDMPEDSDTYLHR.X	VNIVFNYDMPEDSDTYLHR	1	1	6	355	373	19	2327.05	3h
sp|O00148|DX39A_HUMAN	K.VSVFFGGLSIK.K	VSVFFGGLSIK	3	1	3	144	154	11	1152.65	3h
sp|O00154|BACH_HUMAN	K.VLEVPPVVYSR.Q	VLEVPPVVYSR	1	0.9868	1	173	183	11	1256.71	3h
sp|O00160|MYO1F_HUMAN	R.DVLFSDLIELMQTSEQAFLR.M	DVLFSDLIELMQTSEQAFLR	1	1	7	522	541	20	2354.18	3h
sp|O00160|MYO1F_HUMAN	R.VESVDLLAFPAYLLGIDSGR.L	VESVDLLAFPAYLLGIDSGR	1	1	5	297	316	20	2134.13	3h
sp|O00170|AIP_HUMAN	K.VLELDPALAPVVSR.E	VLELDPALAPVVSR	1	1	1	291	304	14	1477.85	3h
sp|O00182|LEG9_HUMAN	R.FDENAVVR.N	FDENAVVR	6	0.9967	6	272	279	8	948.465	3h
sp|O00182|LEG9_HUMAN	X.NTQIDNSWGSEER.X	NTQIDNSWGSEER	3	1	4	280	292	13	1534.66	3h
sp|O00186|STXB3_HUMAN	K.MTDLLEEGITVVENIYK.N	MTDLLEEGITVVENIYK	1	0.9977	1	51	67	17	1965.99	3h
sp|O00193|SMAP_HUMAN	K.INEELESQYQQSMDSK.L	INEELESQYQQSMDSK	4	1	5	76	91	16	1927.85	3h
sp|O00231|PSD11_HUMAN	R.AQSLLSTDR.E	AQSLLSTDR	1	0.9712	1	12	20	9	989.514	3h
sp|O00231|PSD11_HUMAN	R.YQEALHLGSQLLR.E	YQEALHLGSQLLR	1	0.9853	2	143	155	13	1526.82	3h
sp|O00231|PSD11_HUMAN	X.EASIDILHSIVK.X	EASIDILHSIVK	1	0.9964	1	21	32	12	1323.74	3h
sp|O00231|PSD11_HUMAN	R.AELRDDPIISTHLAK.L	AELRDDPIISTHLAK	1	0.9974	1	311	325	15	1677.9	3h
sp|O00231|PSD11_HUMAN	K.EQSILELGSLLAK.T	EQSILELGSLLAK	1	1	9	47	59	13	1399.79	3h
sp|O00231|PSD11_HUMAN	K.IMLNTPEDVQALVSGK.L	IMLNTPEDVQALVSGK	1	1	2	259	274	16	1713.89	3h
sp|O00231|PSD11_HUMAN	X.LYDNLLEQNLIR.X	LYDNLLEQNLIR	1	1	6	326	337	12	1502.81	3h
sp|O00232|PSD12_HUMAN	X.DPNNLLNDWSQK.X	DPNNLLNDWSQK	2	0.9991	2	420	431	12	1442.68	3h
sp|O00232|PSD12_HUMAN	K.EWDLLNENIMLLSK.R	EWDLLNENIMLLSK	2	1	5	79	92	14	1716.87	3h
sp|O00232|PSD12_HUMAN	R.LQEVIETLLSLEK.Q	LQEVIETLLSLEK	1	1	15	40	52	13	1513.86	3h
sp|O00244|ATOX1_HUMAN	K.YDIDLPNKK.V	YDIDLPNKK	3	1	6	31	39	9	1104.58	3h
sp|O00267|SPT5H_HUMAN	X.VEENFVILFSDLTMHELK.X	VEENFVILFSDLTMHELK	2	1	2	495	512	18	2163.09	3h
sp|O00273|DFFA_HUMAN	K.AAFGEEVDAVDTGISR.E	AAFGEEVDAVDTGISR	2	0.9992	2	214	229	16	1635.77	3h
sp|O00299|CLIC1_HUMAN	X.LHIVQVVCK.X	LHIVQVVCK	2	0.9787	1	184	192	9	1037.6	3h
sp|O00299|CLIC1_HUMAN	X.GFTIPEAFR.X	GFTIPEAFR	2	0.9926	9	196	204	9	1036.53	3h
sp|O00299|CLIC1_HUMAN	K.GVTFNVTTVDTK.R	GVTFNVTTVDTK	2	1	1	38	49	12	1280.66	3h
sp|O00299|CLIC1_HUMAN	K.LAALNPESNTAGLDIFAK.F	LAALNPESNTAGLDIFAK	2	1	10	96	113	18	1843.97	3h
sp|O00299|CLIC1_HUMAN	R.LFMVLWLK.G	LFMVLWLK	2	1	15	30	37	8	1048.61	3h
sp|O00299|CLIC1_HUMAN	K.NSNPALNDNLEK.G	NSNPALNDNLEK	2	1	13	120	131	12	1327.64	3h
sp|O00299|CLIC1_HUMAN	K.VLDNYLTSPLPEEVDETSAEDEGVSQR.K	VLDNYLTSPLPEEVDETSAEDEGVSQR	2	1	9	139	165	27	2991.38	3h
sp|O00299|CLIC1_HUMAN	R.YLSNAYAR.E	YLSNAYAR	2	1	6	209	216	8	956.47	3h
sp|O00303|EIF3F_HUMAN	K.AYVSTLMGVPGR.T	AYVSTLMGVPGR	2	1	3	215	226	12	1249.65	3h
sp|O00303|EIF3F_HUMAN	R.IQDALSTVLQYAEDVLSGK.V	IQDALSTVLQYAEDVLSGK	2	1	29	279	297	19	2049.06	3h
sp|O00303|EIF3F_HUMAN	R.LHPVILASIVDSYER.R	LHPVILASIVDSYER	3	1	12	94	108	15	1710.93	3h
sp|O00303|EIF3F_HUMAN	R.TMGVMFTPLTVK.Y	TMGVMFTPLTVK	2	1	14	227	238	12	1323.69	3h
sp|O00391|QSOX1_HUMAN	R.LDVPVWDVEATLNFLK.A	LDVPVWDVEATLNFLK	2	0.9991	2	517	532	16	1857.98	3h
sp|O00391|QSOX1_HUMAN	X.IYMADLESALHYILR.X	IYMADLESALHYILR	2	0.9999	14	299	313	15	1806.93	3h
sp|O00400|ACATN_HUMAN	X.EHLALLAVPMVPLQIILPLIISK.X	EHLALLAVPMVPLQIILPLIISK	1	1	1	343	365	23	2520.55	3h
sp|O00410|IPO5_HUMAN	X.GPEYLTQMWHFMCDALIK.X	GPEYLTQMWHFMCDALIK	1	0.9991	1	738	755	18	2182	3h
sp|O00410|IPO5_HUMAN	X.SLLIPYLDNLVK.X	SLLIPYLDNLVK	1	0.9991	9	476	487	12	1386.81	3h
sp|O00410|IPO5_HUMAN	K.HIVENAVQK.E	HIVENAVQK	1	0.9992	1	540	548	9	1036.57	3h
sp|O00410|IPO5_HUMAN	K.QAEETYENIPGQSK.I	QAEETYENIPGQSK	14	0.9998	1	28	41	14	1592.73	3h
sp|O00410|IPO5_HUMAN	K.SLVEIADTVPK.Y	SLVEIADTVPK	1	0.9998	3	239	249	11	1170.65	3h
sp|O00410|IPO5_HUMAN	X.ITFLLQAIR.X	ITFLLQAIR	13	0.9999	11	42	50	9	1073.66	3h
sp|O00410|IPO5_HUMAN	K.AIGTEPDSDVLSEIMHSFAK.C	AIGTEPDSDVLSEIMHSFAK	1	1	14	756	775	20	2146.02	3h
sp|O00410|IPO5_HUMAN	R.ATAAFILANEHNVALFK.H	ATAAFILANEHNVALFK	1	1	7	196	212	17	1828.98	3h
sp|O00410|IPO5_HUMAN	R.EAALHIFWNFPGIFGNQQQHYLDVIK.R	EAALHIFWNFPGIFGNQQQHYLDVIK	2	1	2	149	174	26	3084.56	3h
sp|O00410|IPO5_HUMAN	K.FLFDSVSSQNVGLR.E	FLFDSVSSQNVGLR	4	1	10	135	148	14	1567.8	3h
sp|O00410|IPO5_HUMAN	K.FMQDASDVMQLLLK.T	FMQDASDVMQLLLK	1	1	9	573	586	14	1637.81	3h
sp|O00410|IPO5_HUMAN	R.LLSSAFDEVYPALPSDVQTAIK.S	LLSSAFDEVYPALPSDVQTAIK	9	1	3	69	90	22	2363.22	3h
sp|O00410|IPO5_HUMAN	K.LVLEQVVTSIASVADTAEEK.F	LVLEQVVTSIASVADTAEEK	1	1	11	507	526	20	2101.11	3h
sp|O00410|IPO5_HUMAN	X.NLIDEDGNNQWPEGLK.X	NLIDEDGNNQWPEGLK	5	1	9	119	134	16	1840.86	3h
sp|O00410|IPO5_HUMAN	X.QLALEVIVTLSETAAAMLR.X	QLALEVIVTLSETAAAMLR	1	1	3	277	295	19	2028.13	3h
sp|O00410|IPO5_HUMAN	K.VIAALLQTMEDQGNQR.V	VIAALLQTMEDQGNQR	1	1	10	442	457	16	1785.9	3h
sp|O00410|IPO5_HUMAN	K.VSDILHSIFSSYK.E	VSDILHSIFSSYK	1	1	12	842	854	13	1494.77	3h
sp|O00422|SAP18_HUMAN	R.GNVPSSELQIYTWMDATLK.E	GNVPSSELQIYTWMDATLK	1	0.9998	1	49	67	19	2152.05	3h
sp|O00423|EMAL1_HUMAN	R.TGSTSSSSSGKK.N	TGSTSSSSSGKK	1	0.9229	4	158	169	12	1112.53	3h
sp|O00429|DNM1L_HUMAN	X.SATLLQLITK.X	SATLLQLITK	3	0.9962	3	330	339	10	1086.66	3h
sp|O00429|DNM1L_HUMAN	X.LHDAIVEVVTCLLR.X	LHDAIVEVVTCLLR	3	0.9993	1	460	473	14	1579.87	3h
sp|O00429|DNM1L_HUMAN	K.IFSPNVVNLTLVDLPGMTK.V	IFSPNVVNLTLVDLPGMTK	2	1	4	134	152	19	2057.12	3h
sp|O00429|DNM1L_HUMAN	K.LDLMDAGTDAMDVLMGR.V	LDLMDAGTDAMDVLMGR	2	1	9	217	233	17	1822.82	3h
sp|O00429|DNM1L_HUMAN	R.LPVTNEMVHNLVAIELAYINTK.H	LPVTNEMVHNLVAIELAYINTK	3	1	9	476	497	22	2481.33	3h
sp|O00429|DNM1L_HUMAN	R.RPLILQLVHVSQEDK.R	RPLILQLVHVSQEDK	3	1	1	61	75	15	1774.01	3h
sp|O00429|DNM1L_HUMAN	X.SSLLDDLLTESEDMAQR.X	SSLLDDLLTESEDMAQR	3	1	5	693	709	17	1921.89	3h
sp|O00429|DNM1L_HUMAN	R.TLESVDPLGGLNTIDILTAIR.N	TLESVDPLGGLNTIDILTAIR	3	1	1	377	397	21	2210.22	3h
sp|O00483|NDUA4_HUMAN	K.FYSVNVDYSK.L	FYSVNVDYSK	1	0.9764	2	64	73	10	1220.57	3h
sp|O00487|PSDE_HUMAN	K.AVEEEDKMTPEQLAIK.N	AVEEEDKMTPEQLAIK	1	0.9991	1	258	273	16	1829.91	3h
sp|O00487|PSDE_HUMAN	R.AGVPMEVMGLMLGEFVDDYTVR.V	AGVPMEVMGLMLGEFVDDYTVR	2	1	7	47	68	22	2428.14	3h
sp|O00487|PSDE_HUMAN	X.AVAVVVDPIQSVK.X	AVAVVVDPIQSVK	1	1	5	140	152	13	1323.77	3h
sp|O00505|IMA3_HUMAN	X.DYVISLGVVKPLLSFISPSIPITFLR.X	DYVISLGVVKPLLSFISPSIPITFLR	2	1	2	193	218	26	2873.66	3h
sp|O00506|STK25_HUMAN	X.ADIWSLGITAIELAK.X	ADIWSLGITAIELAK	12	1	2	196	210	15	1599.88	3h
sp|O00566|MPP10_HUMAN	K.AGDIKTAAEK.T	AGDIKTAAEK	2	0.9665	2	560	569	10	1002.53	3h
sp|O00567|NOP56_HUMAN	K.VLLGVGDPK.I	VLLGVGDPK	2	0.9979	1	91	99	9	896.53	3h
sp|O00567|NOP56_HUMAN	X.LLLETHLPSK.X	LLLETHLPSK	2	0.9991	8	78	87	10	1149.67	3h
sp|O00567|NOP56_HUMAN	R.VVSLSEYR.Q	VVSLSEYR	2	0.9992	1	271	278	8	951.501	3h
sp|O00567|NOP56_HUMAN	X.VLLHVLFEHAVGYALLALK.X	VLLHVLFEHAVGYALLALK	2	0.9998	1	2	20	19	2105.24	3h
sp|O00567|NOP56_HUMAN	K.EAMVQAEEAAAEITR.K	EAMVQAEEAAAEITR	2	1	6	423	437	15	1617.77	3h
sp|O00567|NOP56_HUMAN	X.EVEEISLLQPQVEESVLNLGK.X	EVEEISLLQPQVEESVLNLGK	2	1	2	21	41	21	2352.24	3h
sp|O00567|NOP56_HUMAN	R.LSFYETGEIPR.K	LSFYETGEIPR	2	1	4	405	415	11	1310.65	3h
sp|O00567|NOP56_HUMAN	K.MSQVAPSLSALIGEAVGAR.L	MSQVAPSLSALIGEAVGAR	2	1	14	289	307	19	1855.98	3h
sp|O00567|NOP56_HUMAN	R.VDNMIIQSISLLDQLDK.D	VDNMIIQSISLLDQLDK	2	1	10	164	180	17	1944.02	3h
sp|O00567|NOP56_HUMAN	R.VDNMIIQSISLLDQLDKDINTFSMR.V	VDNMIIQSISLLDQLDKDINTFSMR	2	1	15	164	188	25	2908.47	3h
sp|O00567|NOP56_HUMAN	K.YPASTVQILGAEK.A	YPASTVQILGAEK	2	1	7	321	333	13	1375.73	3h
sp|O00571|DDX3X_HUMAN	K.YLVLDEADR.M	YLVLDEADR	7	0.9751	1	343	351	9	1092.54	3h
sp|O00571|DDX3X_HUMAN	R.HTMMFSATFPK.E	HTMMFSATFPK	4	0.9815	1	377	387	11	1296.6	3h
sp|O00571|DDX3X_HUMAN	K.DLLDLLVEAK.Q	DLLDLLVEAK	4	1	12	555	564	10	1127.64	3h
sp|O00571|DDX3X_HUMAN	K.HVINFDLPSDIEEYVHR.I	HVINFDLPSDIEEYVHR	3	1	6	512	528	17	2082.02	3h
sp|O00571|DDX3X_HUMAN	R.LEQELFSGGNTGINFEK.Y	LEQELFSGGNTGINFEK	6	1	1	146	162	17	1881.91	3h
sp|O00571|DDX3X_HUMAN	R.SFLLDLLNATGK.D	SFLLDLLNATGK	1	1	15	429	440	12	1290.72	3h
sp|O00571|DDX3X_HUMAN	K.SPILVATAVAAR.G	SPILVATAVAAR	3	1	9	492	503	12	1167.7	3h
sp|O00571|DDX3X_HUMAN	K.TAAFLLPILSQIYSDGPGEALR.A	TAAFLLPILSQIYSDGPGEALR	2	1	16	231	252	22	2331.25	3h
sp|O00584|RNT2_HUMAN	R.DPPDYWTIHGLWPDK.S	DPPDYWTIHGLWPDK	6	0.9968	1	57	71	15	1838.86	3h
sp|O00584|RNT2_HUMAN	X.SWPFNLEEIKDLLPEMR.X	SWPFNLEEIKDLLPEMR	3	0.9992	8	78	94	17	2116.07	3h
sp|O00584|RNT2_HUMAN	R.ELDLNSVLLK.L	ELDLNSVLLK	4	1	7	144	153	10	1142.65	3h
sp|O00584|RNT2_HUMAN	K.LGIKPSINYYQVADFK.D	LGIKPSINYYQVADFK	4	1	2	154	169	16	1854.98	3h
sp|O00629|IMA4_HUMAN	K.DAQVVQVVLDGLSNILK.M	DAQVVQVVLDGLSNILK	1	1	27	424	440	17	1810.02	3h
sp|O00754|MA2B1_HUMAN	R.WAQIHLVK.T	WAQIHLVK	1	0.9707	1	675	682	8	993.574	3h
sp|O00754|MA2B1_HUMAN	R.FLEDTFGNDGRPR.V	FLEDTFGNDGRPR	1	0.9764	2	178	190	13	1522.71	3h
sp|O00754|MA2B1_HUMAN	R.VAWHIDPFGHSR.E	VAWHIDPFGHSR	1	0.9801	6	191	202	12	1420.7	3h
sp|O00754|MA2B1_HUMAN	K.TVDQYFYGIK.N	TVDQYFYGIK	1	0.9989	3	80	89	10	1232.61	3h
sp|O00754|MA2B1_HUMAN	R.DLPPSVHLLTLASWGPEMVLLR.L	DLPPSVHLLTLASWGPEMVLLR	1	0.9991	2	895	916	22	2443.33	3h
sp|O00754|MA2B1_HUMAN	X.ATFDPDTGLLMEIMNMNQQLLLPVR.X	ATFDPDTGLLMEIMNMNQQLLLPVR	1	1	3	614	638	25	2859.43	3h
sp|O00754|MA2B1_HUMAN	R.DGSLELMVHR.R	DGSLELMVHR	1	1	8	806	815	10	1155.57	3h
sp|O00754|MA2B1_HUMAN	R.DLFSTFTITR.L	DLFSTFTITR	1	1	3	941	950	10	1199.62	3h
sp|O00754|MA2B1_HUMAN	R.FQVIVYNPLGR.K	FQVIVYNPLGR	1	1	4	510	520	11	1304.72	3h
sp|O00754|MA2B1_HUMAN	X.HLELEWSVGPIPVGDTWGK.X	HLELEWSVGPIPVGDTWGK	1	1	1	709	727	19	2119.07	3h
sp|O00754|MA2B1_HUMAN	R.IYITDGNMQLTVLTDR.S	IYITDGNMQLTVLTDR	1	1	2	782	797	16	1851.94	3h
sp|O00754|MA2B1_HUMAN	R.LPVSEGVFVVK.D	LPVSEGVFVVK	1	1	3	528	538	11	1172.68	3h
sp|O00754|MA2B1_HUMAN	R.LQETTLVANQLR.E	LQETTLVANQLR	1	1	4	951	962	12	1384.77	3h
sp|O00754|MA2B1_HUMAN	X.NDIQHAGVQYILDSVISALLADPTR.X	NDIQHAGVQYILDSVISALLADPTR	1	1	12	90	114	25	2708.41	3h
sp|O00764|PDXK_HUMAN	K.GQVLNSDELQELYEGLR.L	GQVLNSDELQELYEGLR	3	1	1	54	70	17	1961.97	3h
sp|O00764|PDXK_HUMAN	K.SFLAMVVDIVQELK.Q	SFLAMVVDIVQELK	3	1	14	89	102	14	1590.87	3h
sp|O14519|CDKA1_HUMAN	K.YAELLAIIEELGK.E	YAELLAIIEELGK	1	0.9987	1	63	75	13	1460.81	3h
sp|O14561|ACPM_HUMAN	X.LYDKIDPEK.X	LYDKIDPEK	1	0.9922	1	89	97	9	1119.58	3h
sp|O14561|ACPM_HUMAN	K.LSVNSHFMK.D	LSVNSHFMK	1	0.9999	3	98	106	9	1061.53	3h
sp|O14561|ACPM_HUMAN	X.LMCPQEIVDYIADKK.X	LMCPQEIVDYIADKK	1	1	3	138	152	15	1764.88	3h
sp|O14579|COPE_HUMAN	K.LQDAYYIFQEMADK.C	LQDAYYIFQEMADK	2	1	2	198	211	14	1733.8	3h
sp|O14579|COPE_HUMAN	R.MQDLDEDATLTQLATAWVSLATGGEK.L	MQDLDEDATLTQLATAWVSLATGGEK	2	1	11	172	197	26	2763.33	3h
sp|O14579|COPE_HUMAN	R.WEAAEGLLQEALDK.D	WEAAEGLLQEALDK	2	1	1	232	245	14	1571.78	3h
sp|O14617|AP3D1_HUMAN	X.HRPSEADEEELAR.X	HRPSEADEEELAR	2	0.9992	1	655	667	13	1537.71	3h
sp|O14656|TOR1A_HUMAN	R.NLIDYFVPFLPLEYK.H	NLIDYFVPFLPLEYK	3	0.9542	1	261	275	15	1869.99	3h
sp|O14732|IMPA2_HUMAN	K.TSAADLVTETDHLVEDLIISELR.E	TSAADLVTETDHLVEDLIISELR	2	1	12	48	70	23	2539.3	3h
sp|O14735|CDIPT_HUMAN	X.SLISVIHLITAAR.X	SLISVIHLITAAR	3	0.9991	3	187	199	13	1392.84	3h
sp|O14737|PDCD5_HUMAN	K.AVENYLIQMAR.Y	AVENYLIQMAR	2	0.9992	2	69	79	11	1306.67	3h
sp|O14737|PDCD5_HUMAN	R.LSNLALVKPEK.T	LSNLALVKPEK	2	0.9993	1	56	66	11	1210.73	3h
sp|O14737|PDCD5_HUMAN	K.HGDPGDAAQQEAK.H	HGDPGDAAQQEAK	3	1	11	21	33	13	1322.58	3h
sp|O14737|PDCD5_HUMAN	K.VSEQGLIEILK.K	VSEQGLIEILK	1	1	4	87	97	11	1227.71	3h
sp|O14744|ANM5_HUMAN	K.AAILPTSIFLTNK.K	AAILPTSIFLTNK	3	1	5	228	240	13	1387.81	3h
sp|O14744|ANM5_HUMAN	X.GYEDYLQSPLQPLMDNLESQTYEVFEKDPIK.X	GYEDYLQSPLQPLMDNLESQTYEVFEKDPIK	4	1	6	303	333	31	3688.75	3h
sp|O14745|NHRF1_HUMAN	X.LVEVNGENVEK.X	LVEVNGENVEK	1	0.9965	1	59	69	11	1228.63	3h
sp|O14745|NHRF1_HUMAN	R.LVEPGSPAEK.A	LVEPGSPAEK	1	0.9989	1	41	50	10	1025.54	3h
sp|O14745|NHRF1_HUMAN	R.SVDPDSPAEASGLR.A	SVDPDSPAEASGLR	2	0.9991	1	181	194	14	1399.66	3h
sp|O14745|NHRF1_HUMAN	R.LLVVDPETDEQLQK.L	LLVVDPETDEQLQK	2	1	3	88	101	14	1625.85	3h
sp|O14773|TPP1_HUMAN	X.PSYQEEAVTK.X	PSYQEEAVTK	5	0.9754	1	419	428	10	1150.55	3h
sp|O14773|TPP1_HUMAN	R.AYPDVAALSDGYWVVSNR.V	AYPDVAALSDGYWVVSNR	5	1	1	448	465	18	1981.95	3h
sp|O14773|TPP1_HUMAN	R.VPIPWVSGTSASTPVFGGILSLINEHR.I	VPIPWVSGTSASTPVFGGILSLINEHR	5	1	11	466	492	27	2833.51	3h
sp|O14776|TCRG1_HUMAN	X.LSMWDRPDDLIGR.X	LSMWDRPDDLIGR	1	0.9685	1	553	565	13	1572.77	3h
sp|O14776|TCRG1_HUMAN	R.GPPPPPTASEPTR.R	GPPPPPTASEPTR	1	0.988	3	1082	1094	13	1302.66	3h
sp|O14776|TCRG1_HUMAN	X.VFFYNPTTR.X	VFFYNPTTR	1	0.9949	1	544	552	9	1143.57	3h
sp|O14776|TCRG1_HUMAN	K.LIVAYVDDLDR.R	LIVAYVDDLDR	1	0.9957	2	1070	1080	11	1290.68	3h
sp|O14787|TNPO2_HUMAN	X.EVLASHLVQLIPILVNGMK.X	EVLASHLVQLIPILVNGMK	3	0.9969	1	289	307	19	2073.2	3h
sp|O14787|TNPO2_HUMAN	X.AQALMDNIDTFIEHLFALAVDDDPEVR.X	AQALMDNIDTFIEHLFALAVDDDPEVR	3	0.9983	1	204	230	27	3057.47	3h
sp|O14787|TNPO2_HUMAN	X.EELLPHLLPLLK.X	EELLPHLLPLLK	3	0.9985	5	389	400	12	1413.86	3h
sp|O14787|TNPO2_HUMAN	R.ATIGILITTIASK.G	ATIGILITTIASK	3	1	3	106	118	13	1300.8	3h
sp|O14818|PSA7_HUMAN	X.ILNPEEIEK.X	ILNPEEIEK	2	0.9955	11	219	227	9	1083.58	3h
sp|O14818|PSA7_HUMAN	R.DIVVLGVEK.K	DIVVLGVEK	2	0.9992	1	39	47	9	970.567	3h
sp|O14818|PSA7_HUMAN	X.LTVEDPVTVEYITR.X	LTVEDPVTVEYITR	4	1	7	96	109	14	1633.86	3h
sp|O14818|PSA7_HUMAN	X.LYQTDPSGTYHAWK.X	LYQTDPSGTYHAWK	3	1	13	144	157	14	1665.78	3h
sp|O14818|PSA7_HUMAN	K.NYTDEAIETDDLTIK.L	NYTDEAIETDDLTIK	2	1	13	175	189	15	1739.81	3h
sp|O14818|PSA7_HUMAN	X.RPFGISALIVGFDFDGTPR.X	RPFGISALIVGFDFDGTPR	2	1	13	125	143	19	2064.08	3h
sp|O14828|SCAM3_HUMAN	R.ELQHAALGGTATR.Q	ELQHAALGGTATR	1	0.9982	3	119	131	13	1323.69	3h
sp|O14828|SCAM3_HUMAN	R.TAAANAAAGAAENAFR.A	TAAANAAAGAAENAFR	1	1	2	330	345	16	1475.71	3h
sp|O14920|IKKB_HUMAN	R.EGAILTLLSDIASALR.Y	EGAILTLLSDIASALR	4	1	8	119	134	16	1641.93	3h
sp|O14925|TIM23_HUMAN	R.GGLTGLTLTSLYALYNNWEHMK.G	GGLTGLTLTSLYALYNNWEHMK	3	1	2	180	201	22	2481.23	3h
sp|O14929|HAT1_HUMAN	R.VSQMLILTPFQGQGHGAQLLETVHR.Y	VSQMLILTPFQGQGHGAQLLETVHR	1	0.9548	1	238	262	25	2759.45	3h
sp|O14929|HAT1_HUMAN	K.EVDFKPFGTLLHTYSVLSPTGGENFTFQIYK.A	EVDFKPFGTLLHTYSVLSPTGGENFTFQIYK	1	1	4	133	163	31	3534.77	3h
sp|O14929|HAT1_HUMAN	R.LLVTDMSDAEQYR.S	LLVTDMSDAEQYR	1	1	8	337	349	13	1539.72	3h
sp|O14929|HAT1_HUMAN	K.LMQGFNEDMAIEAQQK.F	LMQGFNEDMAIEAQQK	1	1	2	305	320	16	1851.85	3h
sp|O14929|HAT1_HUMAN	R.YYTEFPTVLDITAEDPSK.S	YYTEFPTVLDITAEDPSK	1	1	8	263	280	18	2087.99	3h
sp|O14950|ML12B_HUMAN	X.LNGTDPEDVIR.X	LNGTDPEDVIR	4	0.9991	10	94	104	11	1227.61	3h
sp|O14950|ML12B_HUMAN	X.DGFIDKEDLHDMLASLGK.X	DGFIDKEDLHDMLASLGK	4	1	18	46	63	18	2002.96	3h
sp|O14950|ML12B_HUMAN	X.FTDEEVDELYR.X	FTDEEVDELYR	3	1	9	134	144	11	1414.62	3h
sp|O14975|S27A2_HUMAN	K.MYVPMTEDIYNAISAK.T	MYVPMTEDIYNAISAK	2	1	1	601	616	16	1844.87	3h
sp|O14975|S27A2_HUMAN	K.VLLVSPELQAAVEEILPSLK.K	VLLVSPELQAAVEEILPSLK	2	1	6	154	173	20	2147.24	3h
sp|O14975|S27A2_HUMAN	K.YNVTVIQYIGELLR.Y	YNVTVIQYIGELLR	2	1	2	304	317	14	1679.92	3h
sp|O14976|GAK_HUMAN	R.LSIAEVVHQLQEIAAAR.N	LSIAEVVHQLQEIAAAR	2	1	12	304	320	17	1847.03	3h
sp|O14979|HNRDL_HUMAN	K.EYFGAFGEIENIELPMDTK.T	EYFGAFGEIENIELPMDTK	1	1	9	251	269	19	2202.02	3h
sp|O14979|HNRDL_HUMAN	K.MFIGGLSWDTSK.K	MFIGGLSWDTSK	1	1	2	150	161	12	1340.64	3h
sp|O14979|HNRDL_HUMAN	K.MFIGGLSWDTSKK.D	MFIGGLSWDTSKK	1	1	7	150	162	13	1468.73	3h
sp|O14979|HNRDL_HUMAN	K.VFVGGLSPDTSEEQIK.E	VFVGGLSPDTSEEQIK	1	1	6	235	250	16	1704.86	3h
sp|O14979|HNRDL_HUMAN	K.VFVGGLSPDTSEEQIKEYFGAFGEIENIELPMDTK.T	VFVGGLSPDTSEEQIKEYFGAFGEIENIELPMDTK	1	1	1	235	269	35	3888.86	3h
sp|O14980|XPO1_HUMAN	K.YVVGLIIK.T	YVVGLIIK	3	0.9532	1	105	112	8	903.576	3h
sp|O14980|XPO1_HUMAN	K.LISTLIYK.F	LISTLIYK	1	0.9737	1	246	253	8	949.583	3h
sp|O14980|XPO1_HUMAN	X.SNDPQMVAENFVPPLLDAVLIDYQR.X	SNDPQMVAENFVPPLLDAVLIDYQR	1	0.9968	1	766	790	25	2843.41	3h
sp|O14980|XPO1_HUMAN	R.VDTILEFSQNMNTK.Y	VDTILEFSQNMNTK	6	0.9988	1	63	76	14	1638.79	3h
sp|O14980|XPO1_HUMAN	R.IYLDMLNVYK.C	IYLDMLNVYK	1	0.9993	2	713	722	10	1270.66	3h
sp|O14980|XPO1_HUMAN	X.AIIASNIMYIVGQYPR.X	AIIASNIMYIVGQYPR	1	1	15	538	553	16	1807.96	3h
sp|O14980|XPO1_HUMAN	R.EPEVLSTMAIIVNK.L	EPEVLSTMAIIVNK	1	1	8	797	810	14	1542.83	3h
sp|O14980|XPO1_HUMAN	X.ETLMEALHYMLLVSEVEETEIFK.X	ETLMEALHYMLLVSEVEETEIFK	1	1	5	345	367	23	2753.35	3h
sp|O14980|XPO1_HUMAN	R.FLNWIPLGYIFETK.L	FLNWIPLGYIFETK	1	1	2	232	245	14	1739.93	3h
sp|O14980|XPO1_HUMAN	K.ISTSLNPGNPVNNQIFLQEYVANLLK.S	ISTSLNPGNPVNNQIFLQEYVANLLK	1	1	2	958	983	26	2885.53	3h
sp|O14980|XPO1_HUMAN	K.LFVTGLFSLNQDIPAFK.E	LFVTGLFSLNQDIPAFK	1	1	12	996	1012	17	1909.03	3h
sp|O14980|XPO1_HUMAN	K.LNMILVQILK.Q	LNMILVQILK	2	1	5	130	139	10	1183.73	3h
sp|O14980|XPO1_HUMAN	K.LVLDSIIWAFK.H	LVLDSIIWAFK	1	1	8	873	883	11	1303.75	3h
sp|O14980|XPO1_HUMAN	R.MAQEVLTHLK.E	MAQEVLTHLK	8	1	7	45	54	10	1168.63	3h
sp|O14980|XPO1_HUMAN	K.NVDILKDPETVK.Q	NVDILKDPETVK	1	1	4	675	686	12	1369.74	3h
sp|O14980|XPO1_HUMAN	K.YMLLPNQVWDSIIQQATK.N	YMLLPNQVWDSIIQQATK	1	1	15	657	674	18	2147.11	3h
sp|O14980|XPO1_HUMAN	K.YYGLQILENVIK.T	YYGLQILENVIK	6	1	7	77	88	12	1451.8	3h
sp|O15042|SR140_HUMAN	K.LQNIFLGLVNIIEEK.E	LQNIFLGLVNIIEEK	3	1	7	671	685	15	1742	3h
sp|O15067|PUR4_HUMAN	X.ESWLLPGSNDLLLEVGPR.X	ESWLLPGSNDLLLEVGPR	1	0.9981	2	76	93	18	1994.05	3h
sp|O15067|PUR4_HUMAN	X.LAVAEALTNLVFALVTDLR.X	LAVAEALTNLVFALVTDLR	1	1	7	742	760	19	2028.16	3h
sp|O15067|PUR4_HUMAN	R.NPSTVEAFDLAQSNSEHSR.H	NPSTVEAFDLAQSNSEHSR	1	1	1	213	231	19	2087.95	3h
sp|O15116|LSM1_HUMAN	K.ESDTPLQQVSIEEILEEQR.V	ESDTPLQQVSIEEILEEQR	1	1	1	82	100	19	2242.1	3h
sp|O15126|SCAM1_HUMAN	K.TVQTAAANAASTAASSAAQNAFK.G	TVQTAAANAASTAASSAAQNAFK	1	1	1	312	334	23	2151.05	3h
sp|O15143|ARC1B_HUMAN	R.TWKPTLVILR.I	TWKPTLVILR	7	0.9991	12	85	94	10	1225.75	3h
sp|O15143|ARC1B_HUMAN	R.NAYVWTLK.G	NAYVWTLK	8	0.9999	5	75	82	8	993.526	3h
sp|O15143|ARC1B_HUMAN	K.ASSEGGTAAGAGLDSLHK.N	ASSEGGTAAGAGLDSLHK	2	1	13	309	326	18	1627.78	3h
sp|O15143|ARC1B_HUMAN	K.EHNGQVTGIDWAPESNR.I	EHNGQVTGIDWAPESNR	8	1	2	50	66	17	1908.87	3h
sp|O15143|ARC1B_HUMAN	K.EVEERPAPTPWGSK.M	EVEERPAPTPWGSK	2	1	1	175	188	14	1581.78	3h
sp|O15143|ARC1B_HUMAN	K.NSVSQISVLSGGK.A	NSVSQISVLSGGK	2	1	5	327	339	13	1274.68	3h
sp|O15144|ARPC2_HUMAN	R.DDETMYVESK.K	DDETMYVESK	3	0.99	1	148	157	10	1215.49	3h
sp|O15144|ARPC2_HUMAN	-.MILLEVNNR.I	MILLEVNNR	3	0.9989	4	1	9	9	1100.6	3h
sp|O15144|ARPC2_HUMAN	R.ASHTAPQVLFSHR.E	ASHTAPQVLFSHR	3	1	10	191	203	13	1449.75	3h
sp|O15144|ARPC2_HUMAN	X.DNTINLIHTFR.X	DNTINLIHTFR	2	1	6	238	248	11	1342.7	3h
sp|O15144|ARPC2_HUMAN	K.DSIVHQAGMLK.R	DSIVHQAGMLK	3	1	8	107	117	11	1197.62	3h
sp|O15144|ARPC2_HUMAN	K.DTDAAVGDNIGYITFVLFPR.H	DTDAAVGDNIGYITFVLFPR	2	1	7	211	230	20	2183.09	3h
sp|O15144|ARPC2_HUMAN	R.DYLHYHIK.C	DYLHYHIK	2	1	2	249	256	8	1087.54	3h
sp|O15144|ARPC2_HUMAN	K.ELQAHGADELLK.R	ELQAHGADELLK	4	1	5	66	77	12	1322.68	3h
sp|O15144|ARPC2_HUMAN	R.VYGSFLVNPESGYNVSLLYDLENLPASK.D	VYGSFLVNPESGYNVSLLYDLENLPASK	3	1	13	79	106	28	3087.54	3h
sp|O15144|ARPC2_HUMAN	X.YFQFQEEGK.X	YFQFQEEGK	3	1	8	128	136	9	1174.53	3h
sp|O15145|ARPC3_HUMAN	K.VFDPQNDKPSK.W	VFDPQNDKPSK	1	0.999	8	148	158	11	1273.63	3h
sp|O15145|ARPC3_HUMAN	K.LIGNMALLPIR.S	LIGNMALLPIR	2	0.9998	7	15	25	11	1209.72	3h
sp|O15145|ARPC3_HUMAN	K.DTDIVDEAIYYFK.A	DTDIVDEAIYYFK	2	1	12	38	50	13	1590.74	3h
sp|O15145|ARPC3_HUMAN	X.EMYTLGITNFPIPGEPGFPLNAIYAK.X	EMYTLGITNFPIPGEPGFPLNAIYAK	1	1	7	94	119	26	2852.44	3h
sp|O15145|ARPC3_HUMAN	X.PAYHSSLMDPDTK.X	PAYHSSLMDPDTK	2	1	6	2	14	13	1460.66	3h
sp|O15155|BET1_HUMAN	K.SLSIEIGHEVK.T	SLSIEIGHEVK	5	0.9751	1	48	58	11	1210.65	3h
sp|O15160|RPAC1_HUMAN	X.VLVYNNTSIVQDEILAHR.X	VLVYNNTSIVQDEILAHR	5	0.9796	1	92	109	18	2083.11	3h
sp|O15160|RPAC1_HUMAN	X.LLPDITLLEPVEGEAAEELSR.X	LLPDITLLEPVEGEAAEELSR	2	1	2	235	255	21	2293.21	3h
sp|O15160|RPAC1_HUMAN	X.VDVVHMDENSLEFDMVGIDAAIANAFR.X	VDVVHMDENSLEFDMVGIDAAIANAFR	2	1	3	51	77	27	2977.39	3h
sp|O15173|PGRC2_HUMAN	R.GLGAGAGAGEESPATSLPR.M	GLGAGAGAGEESPATSLPR	1	1	10	79	97	19	1696.84	3h
sp|O15212|PFD6_HUMAN	K.LLGPVLVK.Q	LLGPVLVK	3	0.9878	2	59	66	8	837.566	3h
sp|O15260|SURF4_HUMAN	X.GQNDLMGTAEDFADQFLR.X	GQNDLMGTAEDFADQFLR	3	1	19	2	19	18	2026.9	3h
sp|O15260|SURF4_HUMAN	R.NLALGGGLLLLLAESR.S	NLALGGGLLLLLAESR	3	1	7	120	135	16	1608.95	3h
sp|O15305|PMM2_HUMAN	K.VQEQLGNDVVEK.Y	VQEQLGNDVVEK	1	1	1	52	63	12	1356.69	3h
sp|O15347|HMGB3_HUMAN	K.SKFDEMAK.A	SKFDEMAK	4	0.9878	10	58	65	8	954.445	3h
sp|O15347|HMGB3_HUMAN	X.STNPGISIGDVAK.X	STNPGISIGDVAK	4	0.9998	5	113	125	13	1257.65	3h
sp|O15355|PPM1G_HUMAN	X.QLIVANAGDSR.X	QLIVANAGDSR	3	0.9692	1	340	350	11	1142.6	3h
sp|O15355|PPM1G_HUMAN	K.LTTEEVIK.E	LTTEEVIK	2	0.9822	3	105	112	8	931.522	3h
sp|O15355|PPM1G_HUMAN	K.ALDMSYDHKPEDEVELAR.I	ALDMSYDHKPEDEVELAR	3	0.9985	3	359	376	18	2116.97	3h
sp|O15355|PPM1G_HUMAN	R.ETPSQENGPTAK.A	ETPSQENGPTAK	2	0.9989	4	198	209	12	1257.58	3h
sp|O15355|PPM1G_HUMAN	X.NLPPEEQMISALPDIK.X	NLPPEEQMISALPDIK	3	0.9999	6	410	425	16	1793.92	3h
sp|O15355|PPM1G_HUMAN	K.ALEDAFLAIDAK.L	ALEDAFLAIDAK	2	1	3	93	104	12	1275.67	3h
sp|O15355|PPM1G_HUMAN	K.EEPGSDSGTTAVVALIR.G	EEPGSDSGTTAVVALIR	3	1	5	321	337	17	1700.86	3h
sp|O15355|PPM1G_HUMAN	R.LPLPYGFSAMQGWR.V	LPLPYGFSAMQGWR	2	1	5	23	36	14	1621.81	3h
sp|O15371|EIF3D_HUMAN	R.HVILGTQQFKPNEFASQINLSVENAWGILR.C	HVILGTQQFKPNEFASQINLSVENAWGILR	3	0.9302	1	463	492	30	3408.79	3h
sp|O15372|EIF3H_HUMAN	K.LFKPPQPPAR.M	LFKPPQPPAR	3	0.9855	3	304	313	10	1149.66	3h
sp|O15372|EIF3H_HUMAN	K.EGTGSTATSSSSTAGAAGK.G	EGTGSTATSSSSTAGAAGK	8	1	10	6	24	19	1626.73	3h
sp|O15372|EIF3H_HUMAN	X.NSHLINVLMWELEK.X	NSHLINVLMWELEK	4	1	8	207	220	14	1724.89	3h
sp|O15372|EIF3H_HUMAN	R.VDEMSQDIVK.Y	VDEMSQDIVK	4	1	5	250	259	10	1162.55	3h
sp|O15397|IPO8_HUMAN	X.DGALHVIGSLAEILLK.X	DGALHVIGSLAEILLK	1	0.9999	2	431	446	16	1647.95	3h
sp|O15427|MOT4_HUMAN	X.LHKPPADSGVDLR.X	LHKPPADSGVDLR	1	0.9747	1	429	441	13	1403.75	3h
sp|O15427|MOT4_HUMAN	R.LLDLSVFR.D	LLDLSVFR	1	0.9995	7	217	224	8	961.558	3h
sp|O15446|RPA34_HUMAN	X.GHTVTEPIQPLEPELPGEGQPEAR.X	GHTVTEPIQPLEPELPGEGQPEAR	1	1	2	431	454	24	2580.28	3h
sp|O15498|YKT6_HUMAN	K.IILHNTMESLLER.G	IILHNTMESLLER	2	0.9991	4	151	163	13	1567.84	3h
sp|O15511|ARPC5_HUMAN	K.ALAAGGVGSIVR.V	ALAAGGVGSIVR	1	1	2	132	143	12	1069.62	3h
sp|O15511|ARPC5_HUMAN	K.GFESPSDNSSAMLLQWHEK.A	GFESPSDNSSAMLLQWHEK	2	1	16	113	131	19	2161.97	3h
sp|O15511|ARPC5_HUMAN	R.QGNMTAALQAALK.N	QGNMTAALQAALK	2	1	11	48	60	13	1315.69	3h
sp|O15535|ZN193_HUMAN	K.EMVPLAEQTPLTLQSQPK.E	EMVPLAEQTPLTLQSQPK	4	0.9394	2	154	171	18	2009.05	3h
sp|O43143|DHX15_HUMAN	K.YMTDGMLLR.E	YMTDGMLLR	5	0.9336	1	235	243	9	1098.52	3h
sp|O43143|DHX15_HUMAN	K.IIPLYSTLPPQQQQR.I	IIPLYSTLPPQQQQR	1	0.9893	1	385	399	15	1780.98	3h
sp|O43143|DHX15_HUMAN	X.LQLPVWEYK.X	LQLPVWEYK	1	0.9895	2	135	143	9	1174.64	3h
sp|O43143|DHX15_HUMAN	R.SNLGSVVLQLK.K	SNLGSVVLQLK	1	0.9957	3	505	515	11	1156.68	3h
sp|O43143|DHX15_HUMAN	X.FAHIDGDHLTLLNVYHAFK.X	FAHIDGDHLTLLNVYHAFK	1	0.9964	2	617	635	19	2210.12	3h
sp|O43143|DHX15_HUMAN	R.VESLLVTAISK.A	VESLLVTAISK	1	0.9983	4	453	463	11	1158.68	3h
sp|O43143|DHX15_HUMAN	R.HQSFVLVGETGSGK.T	HQSFVLVGETGSGK	1	1	1	153	166	14	1444.73	3h
sp|O43143|DHX15_HUMAN	X.HRLDLGEDYPSGK.X	HRLDLGEDYPSGK	1	1	6	5	17	13	1485.72	3h
sp|O43143|DHX15_HUMAN	X.LGIDDLVHFDFMDPPAPETLMR.X	LGIDDLVHFDFMDPPAPETLMR	1	1	7	517	538	22	2528.21	3h
sp|O43143|DHX15_HUMAN	K.TEMQDNTYPEILR.S	TEMQDNTYPEILR	1	1	2	492	504	13	1608.75	3h
sp|O43148|MCES_HUMAN	R.LSPGGYFIGTTPNSFELIR.R	LSPGGYFIGTTPNSFELIR	1	0.9888	1	308	326	19	2068.06	3h
sp|O43156|TTI1_HUMAN	K.ALADILSESLHSLATSLPR.L	ALADILSESLHSLATSLPR	2	0.9955	1	369	387	19	1993.08	3h
sp|O43156|TTI1_HUMAN	R.LELVELVEDLLLK.C	LELVELVEDLLLK	2	1	5	308	320	13	1524.9	3h
sp|O43169|CYB5B_HUMAN	K.QYYIGDIHPSDLKPESGSK.D	QYYIGDIHPSDLKPESGSK	1	0.9745	1	89	107	19	2133.03	3h
sp|O43169|CYB5B_HUMAN	K.ELWLVIHGR.V	ELWLVIHGR	2	0.9992	9	36	44	9	1121.63	3h
sp|O43169|CYB5B_HUMAN	R.FLNEHPGGEEVLLEQAGVDASESFEDVGHSSDAR.E	FLNEHPGGEEVLLEQAGVDASESFEDVGHSSDAR	2	1	8	51	84	34	3626.64	3h
sp|O43169|CYB5B_HUMAN	X.GQEVETSVTYYR.X	GQEVETSVTYYR	2	1	2	13	24	12	1430.67	3h
sp|O43175|SERA_HUMAN	K.QADVNLVNAK.L	QADVNLVNAK	2	0.9998	1	385	394	10	1070.57	3h
sp|O43175|SERA_HUMAN	R.AGTGVDNVDLEAATR.K	AGTGVDNVDLEAATR	2	1	15	76	90	15	1487.72	3h
sp|O43175|SERA_HUMAN	R.DLPLLLFR.T	DLPLLLFR	2	1	15	462	469	8	985.595	3h
sp|O43175|SERA_HUMAN	X.GTIQVITQGTSLK.X	GTIQVITQGTSLK	2	1	11	352	364	13	1344.76	3h
sp|O43175|SERA_HUMAN	K.ILQDGGLQVVEK.Q	ILQDGGLQVVEK	1	1	6	22	33	12	1297.72	3h
sp|O43175|SERA_HUMAN	R.LLSYQTSLVSDGETWHVMGISSLLPSLEAWK.Q	LLSYQTSLVSDGETWHVMGISSLLPSLEAWK	2	1	11	492	522	31	3446.74	3h
sp|O43175|SERA_HUMAN	K.TLGILGLGR.I	TLGILGLGR	2	1	4	147	155	9	898.558	3h
sp|O43175|SERA_HUMAN	R.TQTSDPAMLPTMIGLLAEAGVR.L	TQTSDPAMLPTMIGLLAEAGVR	2	1	26	470	491	22	2271.16	3h
sp|O43175|SERA_HUMAN	K.VTADVINAAEK.L	VTADVINAAEK	2	1	4	59	69	11	1129.6	3h
sp|O43242|PSMD3_HUMAN	X.AIQLEYSEAR.X	AIQLEYSEAR	1	0.9717	1	297	306	10	1178.59	3h
sp|O43242|PSMD3_HUMAN	X.DFLLPFLEEPMDTEADLQFRPR.X	DFLLPFLEEPMDTEADLQFRPR	1	0.9723	5	129	150	22	2678.3	3h
sp|O43242|PSMD3_HUMAN	X.EQQDLEFAK.X	EQQDLEFAK	1	0.9809	1	515	523	9	1106.52	3h
sp|O43242|PSMD3_HUMAN	X.HDADGQATLLNLLLR.X	HDADGQATLLNLLLR	1	0.99	1	242	256	15	1648.89	3h
sp|O43242|PSMD3_HUMAN	X.FNQVLDQFGEK.X	FNQVLDQFGEK	1	1	2	375	385	11	1323.64	3h
sp|O43252|PAPS1_HUMAN	X.RPVLLLHPLGGWTK.X	RPVLLLHPLGGWTK	2	0.9751	2	446	459	14	1585.94	3h
sp|O43252|PAPS1_HUMAN	K.AWTVLTEYYK.S	AWTVLTEYYK	2	0.9956	1	610	619	10	1272.64	3h
sp|O43252|PAPS1_HUMAN	K.VLTMAPGLITLEIVPFR.V	VLTMAPGLITLEIVPFR	2	1	3	545	561	17	1869.08	3h
sp|O43264|ZW10_HUMAN	K.AMGTLLNTAISEVIGK.I	AMGTLLNTAISEVIGK	1	0.9862	3	652	667	16	1616.88	3h
sp|O43290|SNUT1_HUMAN	R.DLQGLTVEHAIDSFR.E	DLQGLTVEHAIDSFR	1	0.9981	1	253	267	15	1699.85	3h
sp|O43290|SNUT1_HUMAN	K.EAAGTTAAAGTGGATEQPPR.H	EAAGTTAAAGTGGATEQPPR	4	1	4	12	31	20	1812.86	3h
sp|O43292|GPAA1_HUMAN	R.LHQSFFLYLLPGLSR.F	LHQSFFLYLLPGLSR	1	1	1	353	367	15	1789.99	3h
sp|O43324|MCA3_HUMAN	X.DLNSYLEDK.X	DLNSYLEDK	4	0.9239	1	97	105	9	1095.51	3h
sp|O43324|MCA3_HUMAN	K.NDIHTLLK.D	NDIHTLLK	4	0.9965	5	89	96	8	952.533	3h
sp|O43324|MCA3_HUMAN	R.QHLSSVVFIK.N	QHLSSVVFIK	1	0.9991	2	157	166	10	1156.66	3h
sp|O43324|MCA3_HUMAN	K.AIVQQWLEYR.V	AIVQQWLEYR	5	1	3	69	78	10	1304.69	3h
sp|O43324|MCA3_HUMAN	X.QIPVLQTNNGPSLTGLTTIAAHLVK.X	QIPVLQTNNGPSLTGLTTIAAHLVK	4	1	1	29	53	25	2585.45	3h
sp|O43390|HNRPR_HUMAN	K.TLIEAGLPQK.V	TLIEAGLPQK	3	0.9609	1	32	41	10	1068.62	3h
sp|O43390|HNRPR_HUMAN	K.EIEGEEIEIVLAKPPDKK.R	EIEGEEIEIVLAKPPDKK	4	0.9878	4	398	415	18	2036.1	3h
sp|O43390|HNRPR_HUMAN	X.ADGYNQPDSK.X	ADGYNQPDSK	5	0.9922	3	575	584	10	1093.47	3h
sp|O43390|HNRPR_HUMAN	X.LMMDPLSGQNR.X	LMMDPLSGQNR	3	0.9992	1	196	206	11	1260.59	3h
sp|O43390|HNRPR_HUMAN	X.TKENILEEFSK.X	TKENILEEFSK	4	0.9992	1	258	268	11	1336.69	3h
sp|O43390|HNRPR_HUMAN	X.DLYEDELVPLFEK.X	DLYEDELVPLFEK	3	1	12	175	187	13	1608.79	3h
sp|O43390|HNRPR_HUMAN	R.KYGGPPPDSVYSGVQPGIGTEVFVGK.I	KYGGPPPDSVYSGVQPGIGTEVFVGK	2	1	5	146	171	26	2634.33	3h
sp|O43390|HNRPR_HUMAN	R.NLATTVTEEILEK.S	NLATTVTEEILEK	4	1	10	347	359	13	1459.78	3h
sp|O43390|HNRPR_HUMAN	K.VTEGLVDVILYHQPDDK.K	VTEGLVDVILYHQPDDK	3	1	18	269	285	17	1939.99	3h
sp|O43390|HNRPR_HUMAN	K.VWGNVVTVEWADPVEEPDPEVMAK.V	VWGNVVTVEWADPVEEPDPEVMAK	4	1	1	316	339	24	2695.28	3h
sp|O43396|TXNL1_HUMAN	X.ISYFTFIGTPVQATNMNDFK.X	ISYFTFIGTPVQATNMNDFK	1	0.9839	1	260	279	20	2293.11	3h
sp|O43396|TXNL1_HUMAN	X.VGVKPVGSDPDFQPELSGAGSR.X	VGVKPVGSDPDFQPELSGAGSR	1	0.9896	3	2	23	22	2198.09	3h
sp|O43396|TXNL1_HUMAN	R.IDQYQGADAVGLEEK.I	IDQYQGADAVGLEEK	1	1	10	88	102	15	1634.78	3h
sp|O43396|TXNL1_HUMAN	K.QHLENDPGSNEDTDIPK.G	QHLENDPGSNEDTDIPK	1	1	1	105	121	17	1907.85	3h
sp|O43399|TPD54_HUMAN	K.GLLSDSMTDVPVDTGVAAR.T	GLLSDSMTDVPVDTGVAAR	5	1	9	16	34	19	1902.93	3h
sp|O43399|TPD54_HUMAN	R.SWHDVQVSSAYVK.T	SWHDVQVSSAYVK	4	1	1	96	108	13	1504.73	3h
sp|O43399|TPD54_HUMAN	R.TPAVEGLTEAEEEELR.A	TPAVEGLTEAEEEELR	5	1	4	35	50	16	1771.85	3h
sp|O43423|AN32C_HUMAN	X.IKDLSTIEPLK.X	IKDLSTIEPLK	4	0.9868	5	96	106	11	1255.74	3h
sp|O43432|IF4G3_HUMAN	X.FMLQDVIDLR.X	FMLQDVIDLR	1	0.902	1	971	980	10	1248.65	3h
sp|O43447|PPIH_HUMAN	X.IELFADVVPK.X	IELFADVVPK	4	0.9992	11	29	38	10	1129.64	3h
sp|O43447|PPIH_HUMAN	K.IIDGLLVMR.K	IIDGLLVMR	4	0.9995	1	144	152	9	1028.6	3h
sp|O43464|HTRA2_HUMAN	R.AGLRPGDVILAIGEQMVQNAEDVYEAVR.T	AGLRPGDVILAIGEQMVQNAEDVYEAVR	1	1	8	405	432	28	3012.53	3h
sp|O43488|ARK72_HUMAN	R.VASVLGTMEMGR.R	VASVLGTMEMGR	1	0.9287	1	38	49	12	1249.61	3h
sp|O43488|ARK72_HUMAN	K.ALQAAYGASAPSVTSAALR.W	ALQAAYGASAPSVTSAALR	2	1	1	279	297	19	1803.95	3h
sp|O43488|ARK72_HUMAN	R.FYAYNPLAGGLLTGK.Y	FYAYNPLAGGLLTGK	3	1	4	222	236	15	1583.83	3h
sp|O43504|HBXIP_HUMAN	X.GTLSDEHAGVISVLAQQAAK.X	GTLSDEHAGVISVLAQQAAK	2	1	4	35	54	20	1994.04	3h
sp|O43583|DENR_HUMAN	K.QEAGISEGQGTAGEEEEK.K	QEAGISEGQGTAGEEEEK	1	1	2	76	93	18	1847.8	3h
sp|O43583|DENR_HUMAN	K.WPEVDDDSIEDLGEVKK.-	WPEVDDDSIEDLGEVKK	1	1	6	182	198	17	1972.92	3h
sp|O43592|XPOT_HUMAN	R.ILMAIDSELVDR.D	ILMAIDSELVDR	1	0.9973	1	145	156	12	1373.72	3h
sp|O43592|XPOT_HUMAN	K.YSELTTVQQQLIR.E	YSELTTVQQQLIR	1	1	1	68	80	13	1577.84	3h
sp|O43598|RCL_HUMAN	X.YFEADPPGQVAASPDPTT.X	YFEADPPGQVAASPDPTT	1	0.9485	1	157	174	18	1861.84	3h
sp|O43598|RCL_HUMAN	R.FGTVLTEHVAAAELGAR.G	FGTVLTEHVAAAELGAR	1	0.9991	1	49	65	17	1740.91	3h
sp|O43598|RCL_HUMAN	R.LIHEQDLEWLQQADVVVAEVTQPSLGVGYELGR.A	LIHEQDLEWLQQADVVVAEVTQPSLGVGYELGR	1	1	8	75	107	33	3690.89	3h
sp|O43615|TIM44_HUMAN	K.TEMSEVLTEILR.V	TEMSEVLTEILR	1	1	2	294	305	12	1419.73	3h
sp|O43615|TIM44_HUMAN	K.VFEPNEEALGVVLHK.D	VFEPNEEALGVVLHK	1	1	6	223	237	15	1679.89	3h
sp|O43615|TIM44_HUMAN	K.VTDLLGGLFSK.T	VTDLLGGLFSK	1	1	11	283	293	11	1148.64	3h
sp|O43670|ZN207_HUMAN	K.ETIDAVPNAIPGR.T	ETIDAVPNAIPGR	3	1	3	60	72	13	1351.71	3h
sp|O43681|ASNA_HUMAN	R.LLNFPTIVER.G	LLNFPTIVER	2	0.9974	3	176	185	10	1200.69	3h
sp|O43681|ASNA_HUMAN	X.YLDQMEDLYEDFHIVK.X	YLDQMEDLYEDFHIVK	2	1	4	302	317	16	2056.94	3h
sp|O43684|BUB3_HUMAN	X.LNQPPEDGISSVK.X	LNQPPEDGISSVK	1	0.9041	1	9	21	13	1382.7	3h
sp|O43684|BUB3_HUMAN	K.MHDLNTDQENLVGTHDAPIR.C	MHDLNTDQENLVGTHDAPIR	1	1	7	81	100	20	2275.07	3h
sp|O43684|BUB3_HUMAN	R.VAVEYLDPSPEVQK.K	VAVEYLDPSPEVQK	1	1	8	203	216	14	1572.8	3h
sp|O43707|ACTN4_HUMAN	K.DDPVTNLNNAFEVAEK.Y	DDPVTNLNNAFEVAEK	3	0.999	1	218	233	16	1774.84	3h
sp|O43707|ACTN4_HUMAN	R.DLLLDPAWEK.Q	DLLLDPAWEK	10	0.999	3	41	50	10	1198.62	3h
sp|O43707|ACTN4_HUMAN	K.ALDFIASK.G	ALDFIASK	7	0.9992	8	115	122	8	863.473	3h
sp|O43707|ACTN4_HUMAN	R.EAILAIHK.E	EAILAIHK	2	0.9992	2	585	592	8	893.532	3h
sp|O43707|ACTN4_HUMAN	X.HRDYETATLSDIK.X	HRDYETATLSDIK	2	0.9993	2	438	450	13	1547.76	3h
sp|O43707|ACTN4_HUMAN	K.AGTQIENIDEDFRDGLK.L	AGTQIENIDEDFRDGLK	4	0.9995	1	67	83	17	1919.92	3h
sp|O43707|ACTN4_HUMAN	K.AGTQIENIDEDFR.D	AGTQIENIDEDFR	4	1	3	67	79	13	1506.69	3h
sp|O43707|ACTN4_HUMAN	K.AIMTYVSSFYHAFSGAQK.A	AIMTYVSSFYHAFSGAQK	6	1	16	256	273	18	2006.95	3h
sp|O43707|ACTN4_HUMAN	R.ASFNHFDKDHGGALGPEEFK.A	ASFNHFDKDHGGALGPEEFK	2	1	2	772	791	20	2202.01	3h
sp|O43707|ACTN4_HUMAN	K.ASIHEAWTDGK.E	ASIHEAWTDGK	5	1	9	422	432	11	1213.57	3h
sp|O43707|ACTN4_HUMAN	K.DGLAFNALIHR.H	DGLAFNALIHR	5	1	9	194	204	11	1225.65	3h
sp|O43707|ACTN4_HUMAN	R.ETTDTDTADQVIASFK.V	ETTDTDTADQVIASFK	2	1	9	838	853	16	1740.81	3h
sp|O43707|ACTN4_HUMAN	R.FAIQDISVEETSAK.E	FAIQDISVEETSAK	8	1	2	153	166	14	1536.77	3h
sp|O43707|ACTN4_HUMAN	K.GISQEQMQEFR.A	GISQEQMQEFR	2	1	2	761	771	11	1351.62	3h
sp|O43707|ACTN4_HUMAN	K.GYEEWLLNEIR.R	GYEEWLLNEIR	6	1	2	396	406	11	1420.7	3h
sp|O43707|ACTN4_HUMAN	R.HRPELIEYDK.L	HRPELIEYDK	3	1	6	205	214	10	1298.66	3h
sp|O43707|ACTN4_HUMAN	K.HTNYTMEHIR.V	HTNYTMEHIR	6	1	17	724	733	10	1300.6	3h
sp|O43707|ACTN4_HUMAN	R.IMSLVDPNHSGLVTFQAFIDFMSR.E	IMSLVDPNHSGLVTFQAFIDFMSR	2	1	1	814	837	24	2724.34	3h
sp|O43707|ACTN4_HUMAN	R.ISIEMNGTLEDQLSHLK.Q	ISIEMNGTLEDQLSHLK	2	1	5	675	691	17	1926.97	3h
sp|O43707|ACTN4_HUMAN	R.KDDPVTNLNNAFEVAEK.Y	KDDPVTNLNNAFEVAEK	3	1	11	217	233	17	1902.93	3h
sp|O43707|ACTN4_HUMAN	X.KHEAFESDLAAHQDR.X	KHEAFESDLAAHQDR	6	1	6	455	469	15	1752.82	3h
sp|O43707|ACTN4_HUMAN	K.LASDLLEWIR.R	LASDLLEWIR	6	1	9	301	310	10	1214.66	3h
sp|O43707|ACTN4_HUMAN	K.LMLLLEVISGER.L	LMLLLEVISGER	8	1	7	84	95	12	1371.78	3h
sp|O43707|ACTN4_HUMAN	K.LSGSNPYTTVTPQIINSK.W	LSGSNPYTTVTPQIINSK	2	1	2	605	622	18	1919	3h
sp|O43707|ACTN4_HUMAN	K.LVSIGAEEIVDGNAK.M	LVSIGAEEIVDGNAK	3	1	12	126	140	15	1513.8	3h
sp|O43707|ACTN4_HUMAN	K.MLDAEDIVNTARPDEK.A	MLDAEDIVNTARPDEK	3	1	19	240	255	16	1815.87	3h
sp|O43707|ACTN4_HUMAN	K.MTLGMIWTIILR.F	MTLGMIWTIILR	8	1	5	141	152	12	1446.81	3h
sp|O43707|ACTN4_HUMAN	K.MVSDINNGWQHLEQAEK.G	MVSDINNGWQHLEQAEK	2	1	16	379	395	17	1997.92	3h
sp|O43707|ACTN4_HUMAN	K.NVNVQNFHISWK.D	NVNVQNFHISWK	3	1	9	182	193	12	1484.75	3h
sp|O43707|ACTN4_HUMAN	R.QFASQANVVGPWIQTK.M	QFASQANVVGPWIQTK	2	1	2	653	668	16	1772.92	3h
sp|O43707|ACTN4_HUMAN	K.QLEAIDQLHLEYAK.R	QLEAIDQLHLEYAK	2	1	9	522	535	14	1669.87	3h
sp|O43707|ACTN4_HUMAN	X.SIVDYKPNLDLLEQQHQLIQEALIFDNK.X	SIVDYKPNLDLLEQQHQLIQEALIFDNK	2	1	8	696	723	28	3323.74	3h
sp|O43707|ACTN4_HUMAN	R.TINEVENQILTR.D	TINEVENQILTR	5	1	7	746	757	12	1428.76	3h
sp|O43707|ACTN4_HUMAN	X.VEQIAAIAQELNELDYYDSHNVNTR.X	VEQIAAIAQELNELDYYDSHNVNTR	1	1	5	470	494	25	2904.39	3h
sp|O43707|ACTN4_HUMAN	R.VGWEQLLTTIAR.T	VGWEQLLTTIAR	5	1	6	734	745	12	1385.77	3h
sp|O43707|ACTN4_HUMAN	K.VLAVNQENEHLMEDYEK.L	VLAVNQENEHLMEDYEK	3	1	15	284	300	17	2059.95	3h
sp|O43719|HTSF1_HUMAN	X.NMFHPMDFEDDPLVLNEIR.X	NMFHPMDFEDDPLVLNEIR	2	1	2	270	288	19	2331.07	3h
sp|O43747|AP1G1_HUMAN	X.NVGNAILYETVLTIMDIK.X	NVGNAILYETVLTIMDIK	4	0.9839	1	283	300	18	2006.07	3h
sp|O43765|SGTA_HUMAN	K.ALELDPDNETYK.S	ALELDPDNETYK	2	0.9999	3	185	196	12	1406.66	3h
sp|O43765|SGTA_HUMAN	R.LAYAIIQFLHDQLR.H	LAYAIIQFLHDQLR	2	1	15	7	20	14	1699.94	3h
sp|O43776|SYNC_HUMAN	X.VLAELYVSDR.X	VLAELYVSDR	3	0.9724	2	2	11	10	1163.62	3h
sp|O43776|SYNC_HUMAN	K.NDPSLPEPK.C	NDPSLPEPK	3	0.9994	7	105	113	9	995.492	3h
sp|O43776|SYNC_HUMAN	K.NLMFLVLR.D	NLMFLVLR	2	0.9995	5	143	150	8	1004.58	3h
sp|O43776|SYNC_HUMAN	K.EPFPTIYVDSQKENER.W	EPFPTIYVDSQKENER	3	0.9998	2	39	54	16	1950.93	3h
sp|O43776|SYNC_HUMAN	R.FLTWILNR.Y	FLTWILNR	1	0.9999	13	523	530	8	1061.6	3h
sp|O43776|SYNC_HUMAN	K.EDGTFYEFGEDIPEAPER.L	EDGTFYEFGEDIPEAPER	1	1	2	408	425	18	2099.9	3h
sp|O43776|SYNC_HUMAN	R.EGIDPTPYYWYTDQR.K	EGIDPTPYYWYTDQR	1	1	8	492	506	15	1902.84	3h
sp|O43776|SYNC_HUMAN	K.EPFPTIYVDSQK.E	EPFPTIYVDSQK	3	1	6	39	50	12	1422.7	3h
sp|O43776|SYNC_HUMAN	R.IFDSEEILAGYK.R	IFDSEEILAGYK	1	1	4	479	490	12	1383.69	3h
sp|O43776|SYNC_HUMAN	K.KEDGTFYEFGEDIPEAPER.L	KEDGTFYEFGEDIPEAPER	1	1	3	407	425	19	2227.99	3h
sp|O43776|SYNC_HUMAN	R.LTESVDVLMPNVGEIVGGSMR.I	LTESVDVLMPNVGEIVGGSMR	1	1	12	458	478	21	2202.1	3h
sp|O43776|SYNC_HUMAN	R.MNYSDAIVWLK.E	MNYSDAIVWLK	1	1	4	391	401	11	1338.66	3h
sp|O43776|SYNC_HUMAN	K.SPAGSIVHELNPNFQPPK.R	SPAGSIVHELNPNFQPPK	1	1	15	368	385	18	1930.99	3h
sp|O43809|CPSF5_HUMAN	R.LMTEILGR.Q	LMTEILGR	1	0.9998	7	124	131	8	931.515	3h
sp|O43809|CPSF5_HUMAN	K.LPGGELNPGEDEVEGLK.R	LPGGELNPGEDEVEGLK	1	1	5	106	122	17	1751.86	3h
sp|O43809|CPSF5_HUMAN	K.LPGGELNPGEDEVEGLKR.L	LPGGELNPGEDEVEGLKR	1	1	5	106	123	18	1907.96	3h
sp|O43809|CPSF5_HUMAN	X.LPHVLLLQLGTTFFK.X	LPHVLLLQLGTTFFK	1	1	12	91	105	15	1726.02	3h
sp|O43809|CPSF5_HUMAN	K.LVAAPLFELYDNAPGYGPIISSLPQLLSR.F	LVAAPLFELYDNAPGYGPIISSLPQLLSR	1	1	7	193	221	29	3113.68	3h
sp|O43809|CPSF5_HUMAN	R.TINLYPLTNYTFGTK.E	TINLYPLTNYTFGTK	1	1	11	36	50	15	1744.9	3h
sp|O43818|U3IP2_HUMAN	R.AFEEDQVAGR.L	AFEEDQVAGR	1	0.9368	1	102	111	10	1120.51	3h
sp|O43823|AKAP8_HUMAN	K.ETPEEVAADVLAEVITAAVR.A	ETPEEVAADVLAEVITAAVR	1	0.999	10	568	587	20	2082.08	3h
sp|O43852|CALU_HUMAN	X.EEFTAFLHPEEYDYMK.X	EEFTAFLHPEEYDYMK	3	0.9986	5	174	189	16	2047.89	3h
sp|O43852|CALU_HUMAN	K.TFDQLTPEESK.E	TFDQLTPEESK	3	0.9987	2	60	70	11	1293.61	3h
sp|O43929|ORC4_HUMAN	R.LDILELLEK.R	LDILELLEK	1	0.9996	4	196	204	9	1084.64	3h
sp|O60216|RAD21_HUMAN	K.FYSFLVLK.K	FYSFLVLK	6	0.9992	7	597	604	8	1015.57	3h
sp|O60234|GMFG_HUMAN	R.QMVVLEEEFQNISPEELK.M	QMVVLEEEFQNISPEELK	2	1	7	41	58	18	2161.06	3h
sp|O60234|GMFG_HUMAN	R.TTDDLTEAWLQEK.L	TTDDLTEAWLQEK	2	1	11	125	137	13	1548.73	3h
sp|O60264|SMCA5_HUMAN	X.NPELPNAAQAQK.X	NPELPNAAQAQK	1	0.9892	3	803	814	12	1279.65	3h
sp|O60264|SMCA5_HUMAN	K.STLHNWMSEFK.R	STLHNWMSEFK	1	0.9947	1	239	249	11	1378.63	3h
sp|O60264|SMCA5_HUMAN	K.QNLLSVGDYR.H	QNLLSVGDYR	1	0.9988	1	133	142	10	1163.59	3h
sp|O60264|SMCA5_HUMAN	K.LGFDKENVYDELR.Q	LGFDKENVYDELR	1	0.999	1	962	974	13	1596.78	3h
sp|O60264|SMCA5_HUMAN	X.LLNILMQLR.X	LLNILMQLR	5	0.9999	9	446	454	9	1112.67	3h
sp|O60264|SMCA5_HUMAN	K.ESEITDEDIDGILER.G	ESEITDEDIDGILER	1	1	1	666	680	15	1732.8	3h
sp|O60287|NPA1P_HUMAN	X.GGNLTLLHFLLGLK.X	GGNLTLLHFLLGLK	1	0.9992	2	335	348	14	1494.89	3h
sp|O60287|NPA1P_HUMAN	X.GLGALLPTLAVDELDTVLLHTLQR.X	GLGALLPTLAVDELDTVLLHTLQR	1	1	13	1183	1206	24	2557.45	3h
sp|O60306|AQR_HUMAN	X.LNLQFLTLHDYLLR.X	LNLQFLTLHDYLLR	1	0.9967	1	455	468	14	1757.98	3h
sp|O60306|AQR_HUMAN	X.TDVAVQIISNIYHNFPEQR.X	TDVAVQIISNIYHNFPEQR	1	1	4	830	848	19	2243.13	3h
sp|O60313|OPA1_HUMAN	X.IDQLQEELLHTQLK.X	IDQLQEELLHTQLK	6	0.9805	1	215	228	14	1706.92	3h
sp|O60313|OPA1_HUMAN	R.MVLVDLPGVINTVTSGMAPDTK.E	MVLVDLPGVINTVTSGMAPDTK	6	0.9984	1	394	415	22	2257.17	3h
sp|O60313|OPA1_HUMAN	X.SLIDMYSEVLDVLSDYDASYNTQDHLPR.X	SLIDMYSEVLDVLSDYDASYNTQDHLPR	6	1	3	263	290	28	3258.5	3h
sp|O60341|KDM1A_HUMAN	R.LFFAGEHTIR.N	LFFAGEHTIR	1	0.9691	1	796	805	10	1189.62	3h
sp|O60341|KDM1A_HUMAN	K.APILLALVAGEAAGIMENISDDVIVGR.C	APILLALVAGEAAGIMENISDDVIVGR	1	1	6	700	726	27	2706.46	3h
sp|O60361|NDK8_HUMAN	X.DRPFFPGLVK.X	DRPFFPGLVK	4	0.9987	6	42	51	10	1174.65	3h
sp|O60361|NDK8_HUMAN	X.VMLGETNPADSKPGTIR.X	VMLGETNPADSKPGTIR	7	1	19	74	90	17	1784.91	3h
sp|O60361|NDK8_HUMAN	X.YMNSGPVVAMVWEGLNVVK.X	YMNSGPVVAMVWEGLNVVK	4	1	30	52	70	19	2092.04	3h
sp|O60427|FADS1_HUMAN	X.PLLSAFADIIHSLK.X	PLLSAFADIIHSLK	2	1	9	418	431	14	1523.87	3h
sp|O60493|SNX3_HUMAN	K.VVVPPLPGK.A	VVVPPLPGK	1	0.9885	2	87	95	9	904.572	3h
sp|O60493|SNX3_HUMAN	R.YSDFEWLR.S	YSDFEWLR	1	1	3	71	78	8	1114.51	3h
sp|O60506|HNRPQ_HUMAN	K.LKDYAFIHFDER.D	LKDYAFIHFDER	1	0.971	1	370	381	12	1552.77	3h
sp|O60506|HNRPQ_HUMAN	K.DYAFIHFDER.D	DYAFIHFDER	1	0.9889	2	372	381	10	1311.59	3h
sp|O60506|HNRPQ_HUMAN	K.EQILEEFSK.V	EQILEEFSK	1	0.9984	8	257	265	9	1121.56	3h
sp|O60506|HNRPQ_HUMAN	R.LFVGSIPK.S	LFVGSIPK	5	0.9998	9	245	252	8	859.514	3h
sp|O60506|HNRPQ_HUMAN	K.AGPIWDLR.L	AGPIWDLR	4	1	15	185	192	8	926.496	3h
sp|O60506|HNRPQ_HUMAN	R.AIEALKEFNEDGALAVLQQFK.D	AIEALKEFNEDGALAVLQQFK	2	1	6	61	81	21	2333.22	3h
sp|O60506|HNRPQ_HUMAN	X.DLEGENIEIVFAKPPDQK.X	DLEGENIEIVFAKPPDQK	1	1	16	395	412	18	2041.04	3h
sp|O60506|HNRPQ_HUMAN	X.DLFEDELVPLFEK.X	DLFEDELVPLFEK	2	1	10	172	184	13	1592.8	3h
sp|O60506|HNRPQ_HUMAN	K.EFNEDGALAVLQQFK.D	EFNEDGALAVLQQFK	2	1	19	67	81	15	1707.85	3h
sp|O60506|HNRPQ_HUMAN	R.KYGGPPPDSVYSGQQPSVGTEIFVGK.I	KYGGPPPDSVYSGQQPSVGTEIFVGK	2	1	4	143	168	26	2693.33	3h
sp|O60506|HNRPQ_HUMAN	K.LDEIYVAGLVAHSDLDER.A	LDEIYVAGLVAHSDLDER	2	1	1	43	60	18	2014	3h
sp|O60506|HNRPQ_HUMAN	R.NLANTVTEEILEK.A	NLANTVTEEILEK	1	1	13	344	356	13	1472.77	3h
sp|O60506|HNRPQ_HUMAN	R.TGYTLDVTTGQR.K	TGYTLDVTTGQR	5	1	8	131	142	12	1310.65	3h
sp|O60506|HNRPQ_HUMAN	K.TKEQILEEFSK.V	TKEQILEEFSK	1	1	9	255	265	11	1350.7	3h
sp|O60506|HNRPQ_HUMAN	K.VTEGLTDVILYHQPDDK.K	VTEGLTDVILYHQPDDK	1	1	27	266	282	17	1941.97	3h
sp|O60506|HNRPQ_HUMAN	K.VWGNVGTVEWADPIEDPDPEVMAK.V	VWGNVGTVEWADPIEDPDPEVMAK	1	1	17	313	336	24	2653.23	3h
sp|O60506|HNRPQ_HUMAN	K.YGGPPPDSVYSGQQPSVGTEIFVGK.I	YGGPPPDSVYSGQQPSVGTEIFVGK	2	1	3	144	168	25	2565.24	3h
sp|O60610|DIAP1_HUMAN	K.NVILEVNEAVLTESMIQNLIK.Q	NVILEVNEAVLTESMIQNLIK	7	0.9923	2	876	896	21	2369.29	3h
sp|O60610|DIAP1_HUMAN	K.AEPHFLSILQHLLLVR.N	AEPHFLSILQHLLLVR	8	1	24	406	421	16	1885.09	3h
sp|O60610|DIAP1_HUMAN	K.ELGEYFLFDPK.K	ELGEYFLFDPK	7	1	4	1117	1127	11	1356.66	3h
sp|O60610|DIAP1_HUMAN	X.EQLIDMNAEGDETGVMDSLLEALQSGAAFR.X	EQLIDMNAEGDETGVMDSLLEALQSGAAFR	7	1	1	1184	1213	30	3209.48	3h
sp|O60610|DIAP1_HUMAN	R.HLQIEIEGLIDQMIDK.T	HLQIEIEGLIDQMIDK	8	1	4	456	471	16	1893.99	3h
sp|O60610|DIAP1_HUMAN	R.LGLHQVLQDLR.E	LGLHQVLQDLR	8	1	3	341	351	11	1290.74	3h
sp|O60610|DIAP1_HUMAN	K.LSVEEFFMDLHNFR.N	LSVEEFFMDLHNFR	7	1	14	1129	1142	14	1782.84	3h
sp|O60610|DIAP1_HUMAN	R.MEMDDFNEVFQILLNTVK.D	MEMDDFNEVFQILLNTVK	8	1	17	385	402	18	2185.04	3h
sp|O60610|DIAP1_HUMAN	K.TAQNLSIFLGSFR.M	TAQNLSIFLGSFR	7	1	1	856	868	13	1452.77	3h
sp|O60610|DIAP1_HUMAN	X.VSLNNNPVSWVQTFGAEGLASLLDILK.X	VSLNNNPVSWVQTFGAEGLASLLDILK	9	1	4	170	196	27	2884.53	3h
sp|O60641|AP180_HUMAN	R.NTLFNLSNFLDK.S	NTLFNLSNFLDK	15	0.9881	4	101	112	12	1424.73	3h
sp|O60664|PLIN3_HUMAN	R.AQEALLQLSQVLSLMETVK.Q	AQEALLQLSQVLSLMETVK	1	1	3	265	283	19	2100.15	3h
sp|O60664|PLIN3_HUMAN	R.EALDHMVEYVAQNTPVTWLVGPFAPGITEK.A	EALDHMVEYVAQNTPVTWLVGPFAPGITEK	1	1	7	399	428	30	3311.65	3h
sp|O60664|PLIN3_HUMAN	K.SVVTGGVQSVMGSR.L	SVVTGGVQSVMGSR	1	1	9	167	180	14	1362.69	3h
sp|O60664|PLIN3_HUMAN	K.VSGAQEMVSSAK.D	VSGAQEMVSSAK	1	1	7	129	140	12	1192.57	3h
sp|O60711|LPXN_HUMAN	K.ASLDSMLGGLEQELQDLGIATVPK.G	ASLDSMLGGLEQELQDLGIATVPK	3	1	7	126	149	24	2484.28	3h
sp|O60739|EIF1B_HUMAN	X.GDDLLPAGTEDYIHIR.X	GDDLLPAGTEDYIHIR	4	1	8	19	34	16	1783.87	3h
sp|O60739|EIF1B_HUMAN	K.TLTTVQGIADDYDK.K	TLTTVQGIADDYDK	4	1	1	43	56	14	1538.74	3h
sp|O60762|DPM1_HUMAN	K.EGNFDIVSGTR.Y	EGNFDIVSGTR	3	0.9239	1	137	147	11	1193.57	3h
sp|O60762|DPM1_HUMAN	R.ENLPLIVWLLVK.S	ENLPLIVWLLVK	5	0.9965	3	38	49	12	1435.88	3h
sp|O60763|USO1_HUMAN	X.VTNLHLMLQLVR.X	VTNLHLMLQLVR	1	0.9879	1	277	288	12	1435.83	3h
sp|O60763|USO1_HUMAN	X.GVMGGQSAGPQHTEAETIQK.X	GVMGGQSAGPQHTEAETIQK	1	0.9991	2	6	25	20	2024.96	3h
sp|O60763|USO1_HUMAN	R.LEVGIQAMEHLIHVLQTDR.S	LEVGIQAMEHLIHVLQTDR	1	1	11	55	73	19	2201.16	3h
sp|O60763|USO1_HUMAN	X.SQLNSQSVEITK.X	SQLNSQSVEITK	1	1	1	799	810	12	1332.69	3h
sp|O60763|USO1_HUMAN	K.SSQTSGTNEQSSAIVSAR.D	SSQTSGTNEQSSAIVSAR	1	1	5	765	782	18	1808.85	3h
sp|O60784|TOM1_HUMAN	K.VLNLIQSWADAFR.S	VLNLIQSWADAFR	8	1	1	117	129	13	1531.81	3h
sp|O60812|HNRCL_HUMAN	X.LKGDDLQAIK.X	LKGDDLQAIK	2	0.9986	9	175	184	10	1099.62	3h
sp|O60812|HNRCL_HUMAN	X.AAVAGEDGR.X	AAVAGEDGR	3	0.9989	5	65	73	9	844.402	3h
sp|O60814|H2B1K_HUMAN	X.LLLPGELAK.X	LLLPGELAK	17	0.9899	6	101	109	9	952.594	3h
sp|O60814|H2B1K_HUMAN	X.AMGIMNSFVNDIFER.X	AMGIMNSFVNDIFER	16	1	312	59	73	15	1742.81	3h
sp|O60832|DKC1_HUMAN	K.IMLPGVLR.Y	IMLPGVLR	2	0.9987	5	315	322	8	897.545	3h
sp|O60832|DKC1_HUMAN	R.ALETLTGALFQRPPLIAAVK.R	ALETLTGALFQRPPLIAAVK	3	0.999	3	172	191	20	2108.23	3h
sp|O60832|DKC1_HUMAN	K.APQVVAEAAK.T	APQVVAEAAK	2	0.9992	3	434	443	10	982.543	3h
sp|O60832|DKC1_HUMAN	K.LDTSQWPLLLK.N	LDTSQWPLLLK	3	1	12	47	57	11	1312.74	3h
sp|O60832|DKC1_HUMAN	R.LHNAIEGGTQLSR.A	LHNAIEGGTQLSR	3	1	1	159	171	13	1394.73	3h
sp|O60832|DKC1_HUMAN	K.QEYVDYSESAK.K	QEYVDYSESAK	2	1	1	414	424	11	1317.57	3h
sp|O60841|IF2P_HUMAN	K.ILPQYIFNSR.D	ILPQYIFNSR	1	0.9854	3	1096	1105	10	1249.68	3h
sp|O60841|IF2P_HUMAN	K.DDIDLDALAAEIEGAGAAK.E	DDIDLDALAAEIEGAGAAK	1	0.9998	1	15	33	19	1856.9	3h
sp|O60841|IF2P_HUMAN	K.AETPTAAEDDNEGDKK.K	AETPTAAEDDNEGDKK	1	0.9999	4	299	314	16	1689.73	3h
sp|O60841|IF2P_HUMAN	K.TLAGLPLLVAYK.E	TLAGLPLLVAYK	1	0.9999	1	941	952	12	1257.77	3h
sp|O60841|IF2P_HUMAN	K.TSEVPYAGINIGPVHK.K	TSEVPYAGINIGPVHK	1	0.9999	3	1000	1015	16	1680.88	3h
sp|O60841|IF2P_HUMAN	X.AIIVEFAQQGLNAALFYENKDPR.X	AIIVEFAQQGLNAALFYENKDPR	1	1	1	793	815	23	2606.35	3h
sp|O60841|IF2P_HUMAN	X.IFSAEIIYHLFDAFTK.X	IFSAEIIYHLFDAFTK	1	1	9	1056	1071	16	1913.99	3h
sp|O60841|IF2P_HUMAN	X.IPGMLIIDTPGHESFSNLR.X	IPGMLIIDTPGHESFSNLR	1	1	2	695	713	19	2096.07	3h
sp|O60841|IF2P_HUMAN	R.LKEGDTIIVPGVEGPIVTQIR.G	LKEGDTIIVPGVEGPIVTQIR	1	1	2	882	902	21	2233.27	3h
sp|O60841|IF2P_HUMAN	K.LLQAQGVEVPSK.D	LLQAQGVEVPSK	1	1	2	425	436	12	1267.71	3h
sp|O60841|IF2P_HUMAN	X.NKPGPNIESGNEDDDASFK.X	NKPGPNIESGNEDDDASFK	1	1	1	206	224	19	2032.89	3h
sp|O60841|IF2P_HUMAN	X.SEDSTKDDIDLDALAAEIEGAGAAK.X	SEDSTKDDIDLDALAAEIEGAGAAK	1	1	1	9	33	25	2504.17	3h
sp|O60869|EDF1_HUMAN	K.INEKPQVIADYESGR.A	INEKPQVIADYESGR	1	0.9778	1	99	113	15	1717.86	3h
sp|O60884|DNJA2_HUMAN	X.FDVQFPENNWINPDK.X	FDVQFPENNWINPDK	1	0.9998	2	333	347	15	1861.86	3h
sp|O60884|DNJA2_HUMAN	X.ITFTGEADQAPGVEPGDIVLLLQEK.X	ITFTGEADQAPGVEPGDIVLLLQEK	1	1	1	231	255	25	2639.37	3h
sp|O60888|CUTA_HUMAN	X.TQSSLVPALTDFVR.X	TQSSLVPALTDFVR	2	0.9977	4	125	138	14	1532.82	3h
sp|O60888|CUTA_HUMAN	R.LAACVNLIPQITSIYEWK.G	LAACVNLIPQITSIYEWK	3	1	2	93	110	18	2061.09	3h
sp|O60888|CUTA_HUMAN	R.SVHPYEVAEVIALPVEQGNFPYLQWVR.Q	SVHPYEVAEVIALPVEQGNFPYLQWVR	1	1	15	139	165	27	3139.61	3h
sp|O60925|PFD1_HUMAN	K.LADIQIEQLNR.T	LADIQIEQLNR	2	1	3	29	39	11	1311.71	3h
sp|O75083|WDR1_HUMAN	K.VFASLPQVER.G	VFASLPQVER	5	0.9709	1	8	17	10	1144.62	3h
sp|O75083|WDR1_HUMAN	R.LYSILGTTLK.D	LYSILGTTLK	3	0.9992	1	471	480	10	1107.65	3h
sp|O75083|WDR1_HUMAN	R.NIDNPALADIYTEHAHQVVVAK.Y	NIDNPALADIYTEHAHQVVVAK	4	0.9999	2	44	65	22	2417.23	3h
sp|O75083|WDR1_HUMAN	X.FGAVFLWDSGSSVGEITGHNK.X	FGAVFLWDSGSSVGEITGHNK	4	1	1	127	147	21	2207.06	3h
sp|O75083|WDR1_HUMAN	X.LYSILGTTLKDEGK.X	LYSILGTTLKDEGK	3	1	4	471	484	14	1536.84	3h
sp|O75153|K0664_HUMAN	X.FLSHSLVELLNQISPTFK.X	FLSHSLVELLNQISPTFK	2	1	2	277	294	18	2072.13	3h
sp|O75208|COQ9_HUMAN	X.MLIPYIEHWPR.X	MLIPYIEHWPR	2	0.9991	2	192	202	11	1453.75	3h
sp|O75223|GGCT_HUMAN	K.ENGLPLEYQEK.L	ENGLPLEYQEK	3	0.9896	3	149	159	11	1318.64	3h
sp|O75223|GGCT_HUMAN	K.VSEEIEDIIK.K	VSEEIEDIIK	3	0.9997	6	172	181	10	1173.61	3h
sp|O75223|GGCT_HUMAN	R.SYLMTNYESAPPSPQYK.K	SYLMTNYESAPPSPQYK	3	1	2	124	140	17	1974.9	3h
sp|O75223|GGCT_HUMAN	X.TSQTWHGGIATIFQSPGDEVWGVVWK.X	TSQTWHGGIATIFQSPGDEVWGVVWK	3	1	3	60	85	26	2885.41	3h
sp|O75340|PDCD6_HUMAN	R.LSDQFHDILIR.K	LSDQFHDILIR	2	0.9899	3	126	136	11	1355.72	3h
sp|O75340|PDCD6_HUMAN	K.AGVNFSEFTGVWK.Y	AGVNFSEFTGVWK	2	0.9965	1	78	90	13	1440.7	3h
sp|O75340|PDCD6_HUMAN	R.SIISMFDR.E	SIISMFDR	2	1	6	67	74	8	967.478	3h
sp|O75347|TBCA_HUMAN	R.RLEAAYLDLQR.I	RLEAAYLDLQR	5	0.9984	1	70	80	11	1346.73	3h
sp|O75351|VPS4B_HUMAN	K.AGNYEEALQLYQHAVQYFLHVVK.Y	AGNYEEALQLYQHAVQYFLHVVK	1	0.9991	6	24	46	23	2719.37	3h
sp|O75351|VPS4B_HUMAN	R.GILLFGPPGTGK.S	GILLFGPPGTGK	3	1	4	169	180	12	1155.66	3h
sp|O75351|VPS4B_HUMAN	K.LLEPVVSMSDMLR.S	LLEPVVSMSDMLR	1	1	8	404	416	13	1488.77	3h
sp|O75367|H2AY_HUMAN	K.EFVEAVLELR.K	EFVEAVLELR	2	0.9988	4	240	249	10	1203.65	3h
sp|O75367|H2AY_HUMAN	R.HILLAVANDEELNQLLK.G	HILLAVANDEELNQLLK	3	1	1	80	96	17	1932.07	3h
sp|O75368|SH3L1_HUMAN	X.PATGYPLPPQIFNESQYR.X	PATGYPLPPQIFNESQYR	1	0.989	1	59	76	18	2077.03	3h
sp|O75368|SH3L1_HUMAN	X.GDYDAFFEAR.X	GDYDAFFEAR	1	0.9898	4	77	86	10	1189.5	3h
sp|O75368|SH3L1_HUMAN	K.DIAANEENRK.W	DIAANEENRK	1	0.9992	6	38	47	10	1158.56	3h
sp|O75368|SH3L1_HUMAN	R.ENNAVYAFLGLTAPPGSK.E	ENNAVYAFLGLTAPPGSK	1	1	14	87	104	18	1847.94	3h
sp|O75368|SH3L1_HUMAN	X.ENVPENSRPATGYPLPPQIFNESQYR.X	ENVPENSRPATGYPLPPQIFNESQYR	1	1	1	51	76	26	3002.45	3h
sp|O75368|SH3L1_HUMAN	R.VYIASSSGSTAIK.K	VYIASSSGSTAIK	1	1	7	5	17	13	1282.67	3h
sp|O75369|FLNB_HUMAN	X.LIALLEVLSQK.X	LIALLEVLSQK	8	1	14	50	60	11	1225.76	3h
sp|O75369|FLNB_HUMAN	X.QMQLENVSVALEFLDR.X	QMQLENVSVALEFLDR	7	1	9	74	89	16	1890.95	3h
sp|O75390|CISY_HUMAN	K.SMSTEGLMK.F	SMSTEGLMK	1	0.9869	4	451	459	9	982.444	3h
sp|O75390|CISY_HUMAN	X.DYIWNTLNSGR.X	DYIWNTLNSGR	1	0.9893	2	330	340	11	1337.63	3h
sp|O75390|CISY_HUMAN	X.VVPGYGHAVLR.X	VVPGYGHAVLR	1	0.9975	5	341	351	11	1166.65	3h
sp|O75390|CISY_HUMAN	X.GGEEPLPEGLFWLLVTGHIPTEEQVSWLSK.X	GGEEPLPEGLFWLLVTGHIPTEEQVSWLSK	1	0.9992	4	110	139	30	3347.71	3h
sp|O75390|CISY_HUMAN	K.DILADLIPK.E	DILADLIPK	1	0.9997	13	35	43	9	996.584	3h
sp|O75390|CISY_HUMAN	R.AALPSHVVTMLDNFPTNLHPMSQLSAAVTALNSESNFAR.A	AALPSHVVTMLDNFPTNLHPMSQLSAAVTALNSESNFAR	1	1	15	145	183	39	4151.06	3h
sp|O75390|CISY_HUMAN	R.ALGVLAQLIWSR.A	ALGVLAQLIWSR	1	1	2	429	440	12	1325.78	3h
sp|O75390|CISY_HUMAN	K.GLVYETSVLDPDEGIR.F	GLVYETSVLDPDEGIR	1	1	15	77	92	16	1761.88	3h
sp|O75390|CISY_HUMAN	K.HLPNDPMFK.L	HLPNDPMFK	1	1	10	367	375	9	1097.53	3h
sp|O75390|CISY_HUMAN	K.IVPNVLLEQGK.A	IVPNVLLEQGK	1	1	11	383	393	11	1208.71	3h
sp|O75390|CISY_HUMAN	K.TVVGQITVDMMYGGMR.G	TVVGQITVDMMYGGMR	1	1	1	58	73	16	1756.83	3h
sp|O75396|SC22B_HUMAN	R.DLQQYQSQAK.Q	DLQQYQSQAK	1	0.9905	9	29	38	10	1207.58	3h
sp|O75396|SC22B_HUMAN	R.IMVANIEEVLQR.G	IMVANIEEVLQR	1	1	2	148	159	12	1413.76	3h
sp|O75396|SC22B_HUMAN	R.VADGLPLAASMQEDEQSGR.D	VADGLPLAASMQEDEQSGR	1	1	1	10	28	19	1972.91	3h
sp|O75400|PR40A_HUMAN	K.EPAFEDITLESER.K	EPAFEDITLESER	3	1	4	777	789	13	1534.72	3h
sp|O75400|PR40A_HUMAN	K.QAAPPIELDAVWEDIR.E	QAAPPIELDAVWEDIR	3	1	1	756	771	16	1821.93	3h
sp|O75438|NDUB1_HUMAN	X.MVNLLQIVR.X	MVNLLQIVR	1	0.9965	1	1	9	9	1084.64	3h
sp|O75475|PSIP1_HUMAN	X.LPIFFFGTHETAFLGPK.X	LPIFFFGTHETAFLGPK	1	1	9	40	56	17	1921.01	3h
sp|O75477|ERLN1_HUMAN	K.EALEPSGENVIQNK.E	EALEPSGENVIQNK	2	1	6	329	342	14	1526.76	3h
sp|O75489|NDUS3_HUMAN	X.EIWDMFGVFFANHPDLR.X	EIWDMFGVFFANHPDLR	1	1	7	169	185	17	2092.98	3h
sp|O75489|NDUS3_HUMAN	K.FDLNSPWEAFPVYR.Q	FDLNSPWEAFPVYR	1	1	2	233	246	14	1739.83	3h
sp|O75489|NDUS3_HUMAN	X.KFDLNSPWEAFPVYR.X	KFDLNSPWEAFPVYR	1	1	4	232	246	15	1867.92	3h
sp|O75489|NDUS3_HUMAN	K.SLVDLTAVDVPTR.Q	SLVDLTAVDVPTR	3	1	1	110	122	13	1384.76	3h
sp|O75489|NDUS3_HUMAN	R.VVAEPVELAQEFR.K	VVAEPVELAQEFR	1	1	2	219	231	13	1485.78	3h
sp|O75494|SRS10_HUMAN	X.QIEIQFAQGDR.X	QIEIQFAQGDR	4	0.9849	3	80	90	11	1303.65	3h
sp|O75494|SRS10_HUMAN	R.YGPIVDVYVPLDFYTR.R	YGPIVDVYVPLDFYTR	3	1	15	33	48	16	1915.97	3h
sp|O75506|HSBP1_HUMAN	K.TVQDLTSVVQTLLQQMQDK.F	TVQDLTSVVQTLLQQMQDK	1	1	6	8	26	19	2174.12	3h
sp|O75526|HNRGT_HUMAN	R.GFAFVTFESPADAK.A	GFAFVTFESPADAK	5	1	15	50	63	14	1485.71	3h
sp|O75531|BAF_HUMAN	X.AYVVLGQFLVLK.X	AYVVLGQFLVLK	1	1	14	42	53	12	1348.81	3h
sp|O75531|BAF_HUMAN	R.DFVAEPMGEKPVGSLAGIGEVLGK.K	DFVAEPMGEKPVGSLAGIGEVLGK	1	1	17	9	32	24	2399.24	3h
sp|O75533|SF3B1_HUMAN	R.EVMLILIR.E	EVMLILIR	1	0.9981	1	768	775	8	985.598	3h
sp|O75533|SF3B1_HUMAN	R.IVDDLKDEAEQYR.K	IVDDLKDEAEQYR	1	0.9985	1	853	865	13	1592.77	3h
sp|O75533|SF3B1_HUMAN	K.TPIGTPAMNMATPTPGHIMSMTPEQLQAWR.W	TPIGTPAMNMATPTPGHIMSMTPEQLQAWR	1	0.9992	1	358	387	30	3264.55	3h
sp|O75533|SF3B1_HUMAN	K.IMGNLGAADIDHK.L	IMGNLGAADIDHK	1	0.9993	2	875	887	13	1353.67	3h
sp|O75533|SF3B1_HUMAN	R.AFAVVASALGIPSLLPFLK.A	AFAVVASALGIPSLLPFLK	1	1	11	631	649	19	1913.13	3h
sp|O75533|SF3B1_HUMAN	K.AIGPHDVLATLLNNLK.V	AIGPHDVLATLLNNLK	1	1	12	1087	1102	16	1687.96	3h
sp|O75533|SF3B1_HUMAN	K.AIGYLIPLMDAEYANYYTR.E	AIGYLIPLMDAEYANYYTR	1	1	5	749	767	19	2236.09	3h
sp|O75533|SF3B1_HUMAN	K.DYIYAVTPLLEDALMDR.D	DYIYAVTPLLEDALMDR	1	1	6	1164	1180	17	1996.98	3h
sp|O75533|SF3B1_HUMAN	R.EFGAGPLFNQILPLLMSPTLEDQER.H	EFGAGPLFNQILPLLMSPTLEDQER	1	1	2	525	549	25	2814.43	3h
sp|O75533|SF3B1_HUMAN	R.GDTPGHATPGHGGATSSAR.K	GDTPGHATPGHGGATSSAR	1	1	7	271	289	19	1732.79	3h
sp|O75533|SF3B1_HUMAN	R.GGDSIGETPTPGASK.R	GGDSIGETPTPGASK	1	1	11	319	333	15	1372.64	3h
sp|O75533|SF3B1_HUMAN	R.ICFELLELLK.A	ICFELLELLK	1	1	3	1058	1067	10	1219.69	3h
sp|O75533|SF3B1_HUMAN	K.ILVVIEPLLIDEDYYAR.V	ILVVIEPLLIDEDYYAR	1	1	15	574	590	17	2033.11	3h
sp|O75533|SF3B1_HUMAN	K.IVQQIAILMGCAILPHLR.S	IVQQIAILMGCAILPHLR	1	1	1	667	684	18	1988.14	3h
sp|O75533|SF3B1_HUMAN	X.NRPLSDEELDAMFPEGYK.X	NRPLSDEELDAMFPEGYK	1	1	3	396	413	18	2109.97	3h
sp|O75533|SF3B1_HUMAN	K.SLSFLFEYIGEMGK.D	SLSFLFEYIGEMGK	1	1	7	1150	1163	14	1619.79	3h
sp|O75533|SF3B1_HUMAN	R.SLVEIIEHGLVDEQQK.V	SLVEIIEHGLVDEQQK	1	1	12	685	700	16	1835.96	3h
sp|O75533|SF3B1_HUMAN	K.TEILPPFFK.H	TEILPPFFK	1	1	6	808	816	9	1090.61	3h
sp|O75533|SF3B1_HUMAN	K.THEDIEAQIR.E	THEDIEAQIR	3	1	6	7	16	10	1210.6	3h
sp|O75533|SF3B1_HUMAN	R.TISALAIAALAEAATPYGIESFDSVLKPLWK.G	TISALAIAALAEAATPYGIESFDSVLKPLWK	1	1	14	703	733	31	3245.76	3h
sp|O75533|SF3B1_HUMAN	R.WDETPASQMGGSTPVLTPGK.T	WDETPASQMGGSTPVLTPGK	1	1	9	338	357	20	2057.97	3h
sp|O75533|SF3B1_HUMAN	R.WDQTADQTPGATPK.K	WDQTADQTPGATPK	1	1	9	200	213	14	1514.7	3h
sp|O75563|SKAP2_HUMAN	R.NLLADVETFVADILK.G	NLLADVETFVADILK	2	1	4	19	33	15	1659.91	3h
sp|O75607|NPM3_HUMAN	R.NHDHQEIAVPVANLK.L	NHDHQEIAVPVANLK	1	1	6	88	102	15	1683.87	3h
sp|O75608|LYPA1_HUMAN	K.TLVNPANVTFK.T	TLVNPANVTFK	5	0.9892	5	191	201	11	1202.66	3h
sp|O75608|LYPA1_HUMAN	K.ATAAVIFLHGLGDTGHGWAEAFAGIR.S	ATAAVIFLHGLGDTGHGWAEAFAGIR	6	1	3	20	45	26	2637.34	3h
sp|O75608|LYPA1_HUMAN	R.IILGGFSQGGALSLYTALTTQQK.L	IILGGFSQGGALSLYTALTTQQK	5	1	5	113	135	23	2366.28	3h
sp|O75629|CREG1_HUMAN	X.FVTHVSDWGALATISTLEAVR.X	FVTHVSDWGALATISTLEAVR	1	1	2	61	81	21	2272.18	3h
sp|O75643|U520_HUMAN	X.YHVLVNLGK.X	YHVLVNLGK	2	0.9571	1	169	177	9	1041.59	3h
sp|O75643|U520_HUMAN	R.AIFEIVLNR.G	AIFEIVLNR	1	0.978	2	1094	1102	9	1073.62	3h
sp|O75643|U520_HUMAN	R.IASHYYITNDTVQTYNQLLKPTLSEIELFR.V	IASHYYITNDTVQTYNQLLKPTLSEIELFR	1	0.984	1	987	1016	30	3569.84	3h
sp|O75643|U520_HUMAN	X.LELSVHLQPITR.X	LELSVHLQPITR	1	0.989	5	1184	1195	12	1404.81	3h
sp|O75643|U520_HUMAN	X.PFGSEEQLLPVEK.X	PFGSEEQLLPVEK	2	0.9893	1	454	466	13	1471.76	3h
sp|O75643|U520_HUMAN	K.DTLGLFLR.E	DTLGLFLR	1	0.9982	10	746	753	8	933.527	3h
sp|O75643|U520_HUMAN	X.LYDLNHNEIGELIR.X	LYDLNHNEIGELIR	1	0.9985	2	1153	1166	14	1697.87	3h
sp|O75643|U520_HUMAN	K.TGNFQVTELGR.I	TGNFQVTELGR	1	0.9989	1	976	986	11	1220.61	3h
sp|O75643|U520_HUMAN	R.DIDAFWLQR.Q	DIDAFWLQR	2	1	4	262	270	9	1162.58	3h
sp|O75643|U520_HUMAN	R.EEEVTGPVIAPLFPQK.R	EEEVTGPVIAPLFPQK	1	1	1	2044	2059	16	1752.93	3h
sp|O75643|U520_HUMAN	R.ETYEVLLSFIQAALGDQPR.D	ETYEVLLSFIQAALGDQPR	2	1	21	111	129	19	2149.11	3h
sp|O75643|U520_HUMAN	R.FYDDAIVSQK.K	FYDDAIVSQK	2	1	7	275	284	10	1184.57	3h
sp|O75643|U520_HUMAN	X.GLFYFDNSFRPVPLEQTYVGITEK.X	GLFYFDNSFRPVPLEQTYVGITEK	1	1	1	672	695	24	2819.41	3h
sp|O75643|U520_HUMAN	R.GLIEIISNAAEYENIPIR.H	GLIEIISNAAEYENIPIR	2	1	4	1844	1861	18	2014.07	3h
sp|O75643|U520_HUMAN	X.HLSDHLSELVEQTLSDLEQSK.X	HLSDHLSELVEQTLSDLEQSK	2	1	11	1780	1800	21	2407.19	3h
sp|O75643|U520_HUMAN	K.LPDMLNAEIVLGNVQNAK.D	LPDMLNAEIVLGNVQNAK	1	1	1	897	914	18	1938.02	3h
sp|O75643|U520_HUMAN	R.MDTDLETMDLDQGGEALAPR.Q	MDTDLETMDLDQGGEALAPR	2	1	1	387	406	20	2176.96	3h
sp|O75643|U520_HUMAN	R.NALLQLTDSQIADVAR.F	NALLQLTDSQIADVAR	2	1	3	1994	2009	16	1726.92	3h
sp|O75643|U520_HUMAN	X.RLDLVHTAALMLDK.X	RLDLVHTAALMLDK	1	1	10	953	966	14	1594.88	3h
sp|O75643|U520_HUMAN	R.SLVQEMVGSFGK.R	SLVQEMVGSFGK	2	1	1	546	557	12	1280.64	3h
sp|O75643|U520_HUMAN	R.TLVEDLFADK.H	TLVEDLFADK	1	1	2	795	804	10	1149.59	3h
sp|O75643|U520_HUMAN	K.VELTITPDFQWDEK.V	VELTITPDFQWDEK	1	1	1	1200	1213	14	1719.84	3h
sp|O75643|U520_HUMAN	X.YAQDEHLITFFVPVFEPLPPQYFIR.X	YAQDEHLITFFVPVFEPLPPQYFIR	1	1	2	1245	1269	25	3065.57	3h
sp|O75663|TIPRL_HUMAN	X.VMPSSFFLLLR.X	VMPSSFFLLLR	1	0.9747	2	174	184	11	1308.72	3h
sp|O75663|TIPRL_HUMAN	K.ISSLMHVPPSLFTEPNEISQYLPIK.E	ISSLMHVPPSLFTEPNEISQYLPIK	1	1	1	221	245	25	2839.48	3h
sp|O75663|TIPRL_HUMAN	K.LADELHMPSLPEMMFGDNVLR.I	LADELHMPSLPEMMFGDNVLR	1	1	2	36	56	21	2414.14	3h
sp|O75694|NU155_HUMAN	R.LLEVYDQLFK.S	LLEVYDQLFK	2	0.9962	1	1299	1308	10	1266.68	3h
sp|O75694|NU155_HUMAN	X.LLQVASPFLEPHLVR.X	LLQVASPFLEPHLVR	2	0.9991	1	1052	1066	15	1717.99	3h
sp|O75792|RNH2A_HUMAN	X.MEDTDFVGWALDVLSPNLISTSMLGR.X	MEDTDFVGWALDVLSPNLISTSMLGR	1	0.9983	2	83	108	26	2866.39	3h
sp|O75792|RNH2A_HUMAN	K.LQDLDTDYGSGYPNDPK.T	LQDLDTDYGSGYPNDPK	1	1	3	199	215	17	1896.84	3h
sp|O75821|EIF3G_HUMAN	K.ELAEQLGLSTGEK.E	ELAEQLGLSTGEK	1	1	9	181	193	13	1373.7	3h
sp|O75821|EIF3G_HUMAN	K.LPGELEPVQATQNK.T	LPGELEPVQATQNK	1	1	3	196	209	14	1522.8	3h
sp|O75822|EIF3J_HUMAN	R.DDFTEFGK.L	DDFTEFGK	1	0.9992	3	154	161	8	957.406	3h
sp|O75822|EIF3J_HUMAN	K.ETFGVNNAVYGIDAMNPSSR.D	ETFGVNNAVYGIDAMNPSSR	1	1	4	134	153	20	2140.98	3h
sp|O75822|EIF3J_HUMAN	K.VLTPEEQLADK.L	VLTPEEQLADK	2	1	11	107	117	11	1241.65	3h
sp|O75828|CBR3_HUMAN	X.FHQLDIDDLQSIR.X	FHQLDIDDLQSIR	5	0.9992	1	59	71	13	1598.81	3h
sp|O75844|FACE1_HUMAN	K.NEEVLAVLGHELGHWK.L	NEEVLAVLGHELGHWK	1	0.9103	1	326	341	16	1829.94	3h
sp|O75844|FACE1_HUMAN	K.DIQEDSGMEPR.N	DIQEDSGMEPR	1	1	9	293	303	11	1275.54	3h
sp|O75844|FACE1_HUMAN	X.IVLFDTLLEEYSVLNK.X	IVLFDTLLEEYSVLNK	1	1	2	277	292	16	1895.03	3h
sp|O75844|FACE1_HUMAN	X.TTTHVPPELGQIMDSETFEK.X	TTTHVPPELGQIMDSETFEK	1	1	2	47	66	20	2259.07	3h
sp|O75874|IDHC_HUMAN	R.SDYLNTFEFMDK.L	SDYLNTFEFMDK	3	0.9966	1	389	400	12	1508.65	3h
sp|O75874|IDHC_HUMAN	X.LIFPYVELDLHSYDLGIENR.X	LIFPYVELDLHSYDLGIENR	6	0.9987	1	30	49	20	2405.22	3h
sp|O75874|IDHC_HUMAN	K.TVEAEAAHGTVTR.H	TVEAEAAHGTVTR	3	0.9992	1	302	314	13	1340.67	3h
sp|O75874|IDHC_HUMAN	K.GQETSTNPIASIFAWTR.G	GQETSTNPIASIFAWTR	3	1	5	322	338	17	1877.93	3h
sp|O75874|IDHC_HUMAN	K.VEITYTPSDGTQK.V	VEITYTPSDGTQK	3	1	2	152	164	13	1437.7	3h
sp|O75914|PAK3_HUMAN	X.LLQTSNITK.X	LLQTSNITK	10	0.9668	1	116	124	9	1016.59	3h
sp|O75914|PAK3_HUMAN	X.STMVGTPYWMAPEVVTR.X	STMVGTPYWMAPEVVTR	9	1	13	435	451	17	1923.92	3h
sp|O75915|PRAF3_HUMAN	R.TPMGIVLDALEQQEEGINR.L	TPMGIVLDALEQQEEGINR	2	1	1	160	178	19	2112.05	3h
sp|O75937|DNJC8_HUMAN	X.QLSILVHPDKNQDDADR.X	QLSILVHPDKNQDDADR	1	0.9755	1	79	95	17	1962.97	3h
sp|O75937|DNJC8_HUMAN	R.QREEEIEAQEK.A	QREEEIEAQEK	1	0.9979	4	191	201	11	1387.66	3h
sp|O75947|ATP5H_HUMAN	X.SWNETLTSR.X	SWNETLTSR	1	0.9857	2	33	41	9	1092.52	3h
sp|O75947|ATP5H_HUMAN	X.TIDWVAFAEIIPQNQK.X	TIDWVAFAEIIPQNQK	1	0.999	2	10	25	16	1871.98	3h
sp|O75947|ATP5H_HUMAN	R.LAALPENPPAIDWAYYK.A	LAALPENPPAIDWAYYK	1	1	13	42	58	17	1930.98	3h
sp|O75947|ATP5H_HUMAN	K.NLIPFDQMTIEDLNEAFPETK.L	NLIPFDQMTIEDLNEAFPETK	1	1	10	124	144	21	2464.18	3h
sp|O75947|ATP5H_HUMAN	K.YTAQVDAEEKEDVK.S	YTAQVDAEEKEDVK	1	1	1	86	99	14	1623.76	3h
sp|O75964|ATP5L_HUMAN	R.LATFWYYAK.V	LATFWYYAK	2	0.9997	2	27	35	9	1161.58	3h
sp|O75976|CBPD_HUMAN	R.ELLLNLIEYLCK.N	ELLLNLIEYLCK	1	0.9964	1	572	583	12	1462.81	3h
sp|O76003|GLRX3_HUMAN	K.GELVGGLDIVK.E	GELVGGLDIVK	1	0.999	4	309	319	11	1098.62	3h
sp|O76003|GLRX3_HUMAN	K.AYSNWPTYPQLYVK.G	AYSNWPTYPQLYVK	1	1	2	295	308	14	1728.85	3h
sp|O76003|GLRX3_HUMAN	K.LEAEGVPEVSEK.Y	LEAEGVPEVSEK	1	1	1	68	79	12	1285.64	3h
sp|O76021|RL1D1_HUMAN	R.LTLPHSIR.S	LTLPHSIR	2	0.9905	3	82	89	8	935.555	3h
sp|O76021|RL1D1_HUMAN	K.DDVAPESGDTTVK.K	DDVAPESGDTTVK	2	0.9989	3	319	331	13	1332.6	3h
sp|O76021|RL1D1_HUMAN	K.TVSQIISLQTLK.K	TVSQIISLQTLK	2	0.9999	3	125	136	12	1329.79	3h
sp|O76021|RL1D1_HUMAN	K.ATNESEDEIPQLVPIGK.K	ATNESEDEIPQLVPIGK	2	1	1	357	373	17	1838.93	3h
sp|O76021|RL1D1_HUMAN	R.IGHVGMQIEHIIENIVAVTK.G	IGHVGMQIEHIIENIVAVTK	2	1	7	216	235	20	2200.2	3h
sp|O76021|RL1D1_HUMAN	K.SAALPIFSSFVSNWDEATK.R	SAALPIFSSFVSNWDEATK	2	1	4	258	276	19	2069.01	3h
sp|O76094|SRP72_HUMAN	K.EAISDLQQLWK.Q	EAISDLQQLWK	2	0.9891	3	465	475	11	1329.69	3h
sp|O76094|SRP72_HUMAN	K.GTQGATAGASSELDASK.T	GTQGATAGASSELDASK	1	0.9983	1	601	617	17	1549.72	3h
sp|O76094|SRP72_HUMAN	K.DIHTLAQLISAYSLVDPEK.A	DIHTLAQLISAYSLVDPEK	2	0.9998	3	480	498	19	2112.11	3h
sp|O76094|SRP72_HUMAN	K.LKPTDVGLLAVIANNIITINK.D	LKPTDVGLLAVIANNIITINK	2	1	9	255	275	21	2219.32	3h
sp|O94776|MTA2_HUMAN	R.DITLFHAMDTLQR.N	DITLFHAMDTLQR	2	0.939	1	228	240	13	1559.78	3h
sp|O94776|MTA2_HUMAN	K.TLLADQGEIR.V	TLLADQGEIR	1	0.9757	1	139	148	10	1114.6	3h
sp|O94776|MTA2_HUMAN	X.EFEEESKQPGVSEQQR.X	EFEEESKQPGVSEQQR	1	1	1	65	80	16	1905.87	3h
sp|O94776|MTA2_HUMAN	X.VGDYVYFENSSSNPYLVR.X	VGDYVYFENSSSNPYLVR	1	1	1	8	25	18	2107.98	3h
sp|O94776|MTA2_HUMAN	K.VWDPDNPLTDR.Q	VWDPDNPLTDR	2	1	2	178	188	11	1326.62	3h
sp|O94804|STK10_HUMAN	R.DLDPNEVWEIVGELGDGAFGK.V	DLDPNEVWEIVGELGDGAFGK	1	1	13	29	49	21	2259.07	3h
sp|O94808|GFPT2_HUMAN	X.QVLEELTELPVMVELASDFLDR.X	QVLEELTELPVMVELASDFLDR	2	0.9897	2	387	408	22	2545.3	3h
sp|O94826|TOM70_HUMAN	X.GLLQLQWK.X	GLLQLQWK	1	0.9882	2	517	524	8	984.574	3h
sp|O94826|TOM70_HUMAN	K.ILLDQVEEAVADFDECIR.L	ILLDQVEEAVADFDECIR	1	0.9993	1	412	429	18	2077	3h
sp|O94826|TOM70_HUMAN	K.SYFSSFTDDIISQPMLK.G	SYFSSFTDDIISQPMLK	1	1	9	259	275	17	1977.94	3h
sp|O94874|UFL1_HUMAN	K.FFADDTQAALTK.H	FFADDTQAALTK	1	0.9858	1	560	571	12	1326.64	3h
sp|O94903|PROSC_HUMAN	X.LMAVPNLFMLETVDSVK.X	LMAVPNLFMLETVDSVK	4	1	2	105	121	17	1905.99	3h
sp|O94903|PROSC_HUMAN	R.TFGENYVQELLEK.A	TFGENYVQELLEK	4	1	2	64	76	13	1568.77	3h
sp|O94925|GLSK_HUMAN	K.FVIPDFMSFTSHIDELYESAK.K	FVIPDFMSFTSHIDELYESAK	1	0.9893	2	219	239	21	2475.16	3h
sp|O94925|GLSK_HUMAN	K.DGPGETDAFGNSEGK.E	DGPGETDAFGNSEGK	1	1	2	107	121	15	1479.61	3h
sp|O94925|GLSK_HUMAN	X.FDYVMQFLNK.X	FDYVMQFLNK	1	1	3	355	364	10	1303.62	3h
sp|O94973|AP2A2_HUMAN	X.VGGYILGEFGNLIAGDPR.X	VGGYILGEFGNLIAGDPR	5	0.9989	2	498	515	18	1846.95	3h
sp|O94979|SC31A_HUMAN	R.NPAVLSAASFDGR.I	NPAVLSAASFDGR	6	1	1	315	327	13	1303.65	3h
sp|O94989|ARHGF_HUMAN	R.CSAEVGRMK.Q	CSAEVGRMK	2	0.9038	2	598	606	9	979.455	3h
sp|O95197|RTN3_HUMAN	X.LFLVEDLVDSLK.X	LFLVEDLVDSLK	1	0.9882	1	948	959	12	1389.77	3h
sp|O95197|RTN3_HUMAN	X.TQIDHYVGIAR.X	TQIDHYVGIAR	1	1	5	999	1009	11	1271.66	3h
sp|O95202|LETM1_HUMAN	K.FLQDTIEEMALK.N	FLQDTIEEMALK	1	1	6	263	274	12	1436.72	3h
sp|O95202|LETM1_HUMAN	K.VAEVEGEQVDNK.A	VAEVEGEQVDNK	1	1	10	452	463	12	1315.62	3h
sp|O95232|LC7L3_HUMAN	X.LVEQLKEER.X	LVEQLKEER	1	0.9913	1	161	169	9	1142.63	3h
sp|O95232|LC7L3_HUMAN	K.IQVLTDKIDVLLQQIEELGSEGK.V	IQVLTDKIDVLLQQIEELGSEGK	1	1	1	129	151	23	2567.4	3h
sp|O95232|LC7L3_HUMAN	R.LALSQNQQSSGAAGPTGK.N	LALSQNQQSSGAAGPTGK	2	1	7	107	124	18	1713.86	3h
sp|O95347|SMC2_HUMAN	K.VLNMKPPEILSMIEEAAGTR.M	VLNMKPPEILSMIEEAAGTR	2	1	1	153	172	20	2198.14	3h
sp|O95352|ATG7_HUMAN	K.LLLEQAANEIWESIK.S	LLLEQAANEIWESIK	6	1	2	103	117	15	1755.94	3h
sp|O95372|LYPA2_HUMAN	X.ETAAVIFLHGLGDTGHSWADALSTIR.X	ETAAVIFLHGLGDTGHSWADALSTIR	6	1	3	23	48	26	2737.38	3h
sp|O95373|IPO7_HUMAN	R.ETENDDLTNVIQK.M	ETENDDLTNVIQK	1	0.9105	1	552	564	13	1517.72	3h
sp|O95373|IPO7_HUMAN	X.AIFQTIQNR.X	AIFQTIQNR	1	0.9737	2	964	972	9	1089.59	3h
sp|O95373|IPO7_HUMAN	X.ENIVEAIIHSPELIR.X	ENIVEAIIHSPELIR	2	0.9992	4	93	107	15	1731.95	3h
sp|O95373|IPO7_HUMAN	X.NPVWYQALTHGLNEEQR.X	NPVWYQALTHGLNEEQR	1	0.9993	3	973	989	17	2054	3h
sp|O95373|IPO7_HUMAN	K.AFAVGVQQVLLK.V	AFAVGVQQVLLK	1	0.9998	1	295	306	12	1271.76	3h
sp|O95373|IPO7_HUMAN	K.AVTAMGILNTIDTLLSVVEDHK.E	AVTAMGILNTIDTLLSVVEDHK	1	1	15	605	626	22	2339.24	3h
sp|O95373|IPO7_HUMAN	K.DGALHMIGSLAEILLK.K	DGALHMIGSLAEILLK	1	1	25	430	445	16	1679.92	3h
sp|O95373|IPO7_HUMAN	R.SPLVAAMQHFLPVLK.D	SPLVAAMQHFLPVLK	2	1	20	168	182	15	1649.93	3h
sp|O95379|TFIP8_HUMAN	R.NNQFNQDELALMEK.F	NNQFNQDELALMEK	3	1	1	88	101	14	1692.78	3h
sp|O95379|TFIP8_HUMAN	K.SIATTLIDDTSSEVLDELYR.V	SIATTLIDDTSSEVLDELYR	4	1	29	37	56	20	2240.11	3h
sp|O95433|AHSA1_HUMAN	R.EAMGIYISTLK.T	EAMGIYISTLK	1	0.9999	4	146	156	11	1224.64	3h
sp|O95433|AHSA1_HUMAN	X.FHMVDGNVSGEFTDLVPEK.X	FHMVDGNVSGEFTDLVPEK	1	1	2	250	268	19	2119.99	3h
sp|O95433|AHSA1_HUMAN	R.VFTTQELVQAFTHAPATLEADR.G	VFTTQELVQAFTHAPATLEADR	1	1	4	225	246	22	2444.23	3h
sp|O95453|PARN_HUMAN	R.VMDIPYLNLEGPDLQPK.R	VMDIPYLNLEGPDLQPK	3	0.9965	3	427	443	17	1940.99	3h
sp|O95456|PSMG1_HUMAN	K.IPAILYLCYTDVMK.L	IPAILYLCYTDVMK	1	1	1	228	241	14	1641.85	3h
sp|O95466|FMNL_HUMAN	X.MPLLNWVALKPSQITGTVFTELNDEK.X	MPLLNWVALKPSQITGTVFTELNDEK	1	1	1	642	667	26	2943.54	3h
sp|O95466|FMNL_HUMAN	K.NAVLEHMEELQEQVALLTER.L	NAVLEHMEELQEQVALLTER	1	1	2	395	414	20	2351.18	3h
sp|O95487|SC24B_HUMAN	K.LFPLYVLALLK.Q	LFPLYVLALLK	2	0.9992	5	1073	1083	11	1288.81	3h
sp|O95573|ACSL3_HUMAN	R.LSPEPWTPETGLVTDAFK.L	LSPEPWTPETGLVTDAFK	3	1	12	682	699	18	1986.99	3h
sp|O95757|HS74L_HUMAN	R.YLEEERPFAIEQVTGMLLAK.L	YLEEERPFAIEQVTGMLLAK	3	0.9991	1	105	124	20	2336.21	3h
sp|O95758|ROD1_HUMAN	R.IIIENLFYPVTLEVLHQIFSK.F	IIIENLFYPVTLEVLHQIFSK	3	1	3	184	204	21	2515.41	3h
sp|O95777|NAA38_HUMAN	X.GFDQTINLILDESHER.X	GFDQTINLILDESHER	5	1	3	29	44	16	1885.92	3h
sp|O95782|AP2A1_HUMAN	K.FFQPTEMAAQDFFQR.W	FFQPTEMAAQDFFQR	1	1	4	864	878	15	1861.85	3h
sp|O95782|AP2A1_HUMAN	R.GLAVFISDIR.N	GLAVFISDIR	8	1	3	12	21	10	1089.62	3h
sp|O95816|BAG2_HUMAN	K.EILLEMIHSIQNSQDMR.Q	EILLEMIHSIQNSQDMR	1	1	9	54	70	17	2056.01	3h
sp|O95831|AIFM1_HUMAN	K.AALSASEGEEVPQDK.A	AALSASEGEEVPQDK	2	1	11	113	127	15	1529.72	3h
sp|O95831|AIFM1_HUMAN	K.ELWFSDDPNVTK.T	ELWFSDDPNVTK	2	1	2	178	189	12	1449.68	3h
sp|O95831|AIFM1_HUMAN	R.VLIVSEDPELPYMRPPLSK.E	VLIVSEDPELPYMRPPLSK	2	1	7	159	177	19	2182.17	3h
sp|O95983|MBD3_HUMAN	X.LEEALMADMLAHVEELAR.X	LEEALMADMLAHVEELAR	1	1	2	239	256	18	2040	3h
sp|O96000|NDUBA_HUMAN	X.AFDLIVDRPVTLVR.X	AFDLIVDRPVTLVR	2	0.9042	1	30	43	14	1612.93	3h
sp|O96000|NDUBA_HUMAN	R.YQDLGAYSSAR.K	YQDLGAYSSAR	2	0.9925	1	137	147	11	1229.57	3h
sp|O96008|TOM40_HUMAN	R.RPGEEGTVMSLAGK.Y	RPGEEGTVMSLAGK	1	0.9974	3	240	253	14	1430.72	3h
sp|O96008|TOM40_HUMAN	K.KLPPLPLTLALGAFLNHR.K	KLPPLPLTLALGAFLNHR	1	1	4	331	348	18	1970.18	3h
sp|O96008|TOM40_HUMAN	K.LPPLPLTLALGAFLNHR.K	LPPLPLTLALGAFLNHR	1	1	10	332	348	17	1842.09	3h
sp|O96019|ACL6A_HUMAN	K.NGMVEDWDSFQAILDHTYK.M	NGMVEDWDSFQAILDHTYK	1	0.9991	3	90	108	19	2268.01	3h
sp|O96019|ACL6A_HUMAN	X.SEASLHPVLMSEAPWNTR.X	SEASLHPVLMSEAPWNTR	1	1	1	113	130	18	2023.98	3h
sp|O96019|ACL6A_HUMAN	K.VDFPTAIGMVVER.D	VDFPTAIGMVVER	1	1	2	35	47	13	1432.74	3h
sp|P00338|LDHA_HUMAN	K.LKGEMMDLQHGSLFLR.T	LKGEMMDLQHGSLFLR	5	0.9047	1	58	73	16	1873.95	3h
sp|P00338|LDHA_HUMAN	R.VHPVSTMIK.G	VHPVSTMIK	3	0.9764	3	270	278	9	1010.56	3h
sp|P00338|LDHA_HUMAN	K.FIIPNVVK.Y	FIIPNVVK	5	0.9952	5	119	126	8	928.572	3h
sp|P00338|LDHA_HUMAN	K.QVVESAYEVIK.L	QVVESAYEVIK	3	0.9975	5	233	243	11	1263.67	3h
sp|P00338|LDHA_HUMAN	R.RVHPVSTMIK.G	RVHPVSTMIK	3	0.9975	1	269	278	10	1166.66	3h
sp|P00338|LDHA_HUMAN	X.DQLIYNLLK.X	DQLIYNLLK	6	0.9978	13	6	14	9	1118.63	3h
sp|P00338|LDHA_HUMAN	X.LVIITAGAR.X	LVIITAGAR	5	0.9986	3	91	99	9	912.574	3h
sp|P00338|LDHA_HUMAN	K.TLHPDLGTDK.D	TLHPDLGTDK	6	0.999	5	213	222	10	1095.56	3h
sp|P00338|LDHA_HUMAN	K.DLADELALVDVIEDK.L	DLADELALVDVIEDK	5	1	8	43	57	15	1656.84	3h
sp|P00338|LDHA_HUMAN	K.GEMMDLQHGSLFLR.T	GEMMDLQHGSLFLR	5	1	22	60	73	14	1632.77	3h
sp|P00338|LDHA_HUMAN	K.GYTSWAIGLSVADLAESIMK.N	GYTSWAIGLSVADLAESIMK	3	1	5	246	265	20	2111.06	3h
sp|P00338|LDHA_HUMAN	K.KSADTLWGIQK.E	KSADTLWGIQK	4	1	2	318	328	11	1245.67	3h
sp|P00338|LDHA_HUMAN	K.SADTLWGIQK.E	SADTLWGIQK	4	1	1	319	328	10	1117.58	3h
sp|P00338|LDHA_HUMAN	K.TLHPDLGTDKDKEQWK.E	TLHPDLGTDKDKEQWK	6	1	8	213	228	16	1909.95	3h
sp|P00338|LDHA_HUMAN	K.VTLTSEEEAR.L	VTLTSEEEAR	4	1	6	306	315	10	1133.56	3h
sp|P00367|DHE3_HUMAN	R.DSNYHLLMSVQESLER.K	DSNYHLLMSVQESLER	2	0.9949	1	461	476	16	1919.9	3h
sp|P00367|DHE3_HUMAN	K.MVEGFFDR.G	MVEGFFDR	3	0.9977	6	69	76	8	999.446	3h
sp|P00367|DHE3_HUMAN	R.YSTDVSVDEVK.A	YSTDVSVDEVK	3	0.9991	3	152	162	11	1240.58	3h
sp|P00367|DHE3_HUMAN	X.IIAEGANGPTTPEADKIFLER.X	IIAEGANGPTTPEADKIFLER	3	0.9992	4	400	420	21	2241.16	3h
sp|P00367|DHE3_HUMAN	X.GVFHGIENFINEASYMSILGMTPGFGDK.X	GVFHGIENFINEASYMSILGMTPGFGDK	2	0.9995	2	275	302	28	3030.42	3h
sp|P00367|DHE3_HUMAN	K.GFIGPGIDVPAPDMSTGER.E	GFIGPGIDVPAPDMSTGER	2	0.9998	4	213	231	19	1914.91	3h
sp|P00367|DHE3_HUMAN	R.DDGSWEVIEGYR.A	DDGSWEVIEGYR	3	1	7	125	136	12	1424.62	3h
sp|P00367|DHE3_HUMAN	K.DIVHSGLAYTMER.S	DIVHSGLAYTMER	2	1	3	504	516	13	1490.72	3h
sp|P00367|DHE3_HUMAN	K.HGGTIPIVPTAEFQDR.I	HGGTIPIVPTAEFQDR	2	1	1	481	496	16	1736.88	3h
sp|P00367|DHE3_HUMAN	K.IIAEGANGPTTPEADK.I	IIAEGANGPTTPEADK	3	1	12	400	415	16	1582.78	3h
sp|P00387|NB5R3_HUMAN	X.DILLRPELEELR.X	DILLRPELEELR	1	0.9878	5	215	226	12	1494.84	3h
sp|P00387|NB5R3_HUMAN	R.STPAITLESPDIK.Y	STPAITLESPDIK	2	0.9989	6	30	42	13	1370.73	3h
sp|P00387|NB5R3_HUMAN	R.GPSGLLVYQGK.G	GPSGLLVYQGK	2	1	4	144	154	11	1117.61	3h
sp|P00403|COX2_HUMAN	K.IFEMGPVFTL.-	IFEMGPVFTL	2	0.9983	3	218	227	10	1152.59	3h
sp|P00403|COX2_HUMAN	R.ILYMTDEVNDPSLTIK.S	ILYMTDEVNDPSLTIK	2	1	5	83	98	16	1850.93	3h
sp|P00403|COX2_HUMAN	R.MMITSQDVLHSWAVPTLGLK.T	MMITSQDVLHSWAVPTLGLK	2	1	9	152	171	20	2226.15	3h
sp|P00441|SODC_HUMAN	K.GDGPVQGIINFEQK.E	GDGPVQGIINFEQK	1	1	4	11	24	14	1500.76	3h
sp|P00441|SODC_HUMAN	R.HVGDLGNVTADK.D	HVGDLGNVTADK	2	1	11	81	92	12	1224.61	3h
sp|P00491|PNPH_HUMAN	X.NTAEWLLSHTK.X	NTAEWLLSHTK	1	0.9991	10	12	22	11	1298.66	3h
sp|P00491|PNPH_HUMAN	X.FPAMSDAYDR.X	FPAMSDAYDR	1	0.9992	2	159	168	10	1171.49	3h
sp|P00491|PNPH_HUMAN	K.VIMDYESLEK.A	VIMDYESLEK	1	0.9993	1	245	254	10	1225.59	3h
sp|P00491|PNPH_HUMAN	R.DHINLPGFSGQNPLR.G	DHINLPGFSGQNPLR	1	1	14	134	148	15	1663.84	3h
sp|P00491|PNPH_HUMAN	K.FEVGDIMLIR.D	FEVGDIMLIR	1	1	13	124	133	10	1191.63	3h
sp|P00491|PNPH_HUMAN	R.FHMYEGYPLWK.V	FHMYEGYPLWK	1	1	2	85	95	11	1469.68	3h
sp|P00491|PNPH_HUMAN	K.LEQFVSILMASIPLPDK.A	LEQFVSILMASIPLPDK	1	1	30	271	287	17	1900.04	3h
sp|P00491|PNPH_HUMAN	X.LGADAVGMSTVPEVIVAR.X	LGADAVGMSTVPEVIVAR	1	1	4	212	229	18	1783.95	3h
sp|P00491|PNPH_HUMAN	R.LVFGFLNGR.A	LVFGFLNGR	1	1	5	68	76	9	1021.57	3h
sp|P00491|PNPH_HUMAN	X.VFHLLGVDTLVVTNAAGGLNPK.X	VFHLLGVDTLVVTNAAGGLNPK	1	1	6	102	123	22	2234.24	3h
sp|P00492|HPRT_HUMAN	R.SIPMTVDFIR.L	SIPMTVDFIR	2	0.9992	3	92	101	10	1177.62	3h
sp|P00492|HPRT_HUMAN	R.VFIPHGLIMDR.T	VFIPHGLIMDR	2	0.9999	6	35	45	11	1296.7	3h
sp|P00492|HPRT_HUMAN	K.FFADLLDYIK.A	FFADLLDYIK	2	1	11	74	83	10	1243.65	3h
sp|P00492|HPRT_HUMAN	K.NVLIVEDIIDTGK.T	NVLIVEDIIDTGK	1	1	2	129	141	13	1427.79	3h
sp|P00492|HPRT_HUMAN	R.SVGYKPDFVGFEIPDK.F	SVGYKPDFVGFEIPDK	2	1	4	171	186	16	1796.89	3h
sp|P00492|HPRT_HUMAN	K.TMQTLLSLVR.Q	TMQTLLSLVR	2	1	11	142	151	10	1160.66	3h
sp|P00492|HPRT_HUMAN	K.VIGGDDLSTLTGK.N	VIGGDDLSTLTGK	2	1	2	116	128	13	1274.67	3h
sp|P00505|AATM_HUMAN	X.PTWGNHTPIFR.X	PTWGNHTPIFR	2	0.9893	7	160	170	11	1324.67	3h
sp|P00505|AATM_HUMAN	R.DAGMQLQGYR.Y	DAGMQLQGYR	2	1	6	171	180	10	1137.52	3h
sp|P00505|AATM_HUMAN	R.IAAAILNTPDLR.K	IAAAILNTPDLR	2	1	4	326	337	12	1266.73	3h
sp|P00558|PGK1_HUMAN	X.NNQITNNQR.X	NNQITNNQR	3	0.9298	1	31	39	9	1100.53	3h
sp|P00558|PGK1_HUMAN	K.IQLINNMLDK.V	IQLINNMLDK	5	0.9971	11	221	230	10	1200.65	3h
sp|P00558|PGK1_HUMAN	K.LTLDKLDVK.G	LTLDKLDVK	4	0.9998	4	7	15	9	1043.62	3h
sp|P00558|PGK1_HUMAN	R.AHSSMVGVNLPQK.A	AHSSMVGVNLPQK	3	1	13	172	184	13	1366.7	3h
sp|P00558|PGK1_HUMAN	K.ALESPERPFLAILGGAK.V	ALESPERPFLAILGGAK	4	1	32	200	216	17	1767.99	3h
sp|P00558|PGK1_HUMAN	K.ALMDEVVK.A	ALMDEVVK	5	1	13	354	361	8	903.471	3h
sp|P00558|PGK1_HUMAN	K.IQLINNMLDKVNEMIIGGGMAFTFLK.V	IQLINNMLDKVNEMIIGGGMAFTFLK	5	1	14	221	246	26	2909.52	3h
sp|P00558|PGK1_HUMAN	K.ITLPVDFVTADK.F	ITLPVDFVTADK	4	1	5	280	291	12	1317.72	3h
sp|P00558|PGK1_HUMAN	K.ITLPVDFVTADKFDENAK.T	ITLPVDFVTADKFDENAK	4	1	24	280	297	18	2022.03	3h
sp|P00558|PGK1_HUMAN	K.LGDVYVNDAFGTAHR.A	LGDVYVNDAFGTAHR	4	1	17	157	171	15	1633.78	3h
sp|P00558|PGK1_HUMAN	K.QIVWNGPVGVFEWEAFAR.G	QIVWNGPVGVFEWEAFAR	4	1	48	333	350	18	2104.05	3h
sp|P00558|PGK1_HUMAN	K.SVVLMSHLGRPDGVPMPDK.Y	SVVLMSHLGRPDGVPMPDK	2	1	23	57	75	19	2034.04	3h
sp|P00558|PGK1_HUMAN	K.SVVLMSHLGRPDGVPMPDKYSLEPVAVELK.S	SVVLMSHLGRPDGVPMPDKYSLEPVAVELK	2	1	12	57	86	30	3262.7	3h
sp|P00558|PGK1_HUMAN	X.VADKIQLINNMLDK.X	VADKIQLINNMLDK	5	1	2	217	230	14	1613.88	3h
sp|P00558|PGK1_HUMAN	R.VDFNVPMK.N	VDFNVPMK	5	1	10	23	30	8	948.471	3h
sp|P00558|PGK1_HUMAN	K.VLNNMEIGTSLFDEEGAK.I	VLNNMEIGTSLFDEEGAK	5	1	15	247	264	18	1965.93	3h
sp|P00558|PGK1_HUMAN	K.VNEMIIGGGMAFTFLK.V	VNEMIIGGGMAFTFLK	5	1	19	231	246	16	1726.87	3h
sp|P00558|PGK1_HUMAN	K.VSHVSTGGGASLELLEGK.V	VSHVSTGGGASLELLEGK	6	1	21	389	406	18	1739.9	3h
sp|P00558|PGK1_HUMAN	K.WNTEDKVSHVSTGGGASLELLEGK.V	WNTEDKVSHVSTGGGASLELLEGK	6	1	1	383	406	24	2513.24	3h
sp|P00558|PGK1_HUMAN	K.YSLEPVAVELK.S	YSLEPVAVELK	2	1	9	76	86	11	1246.68	3h
sp|P00813|ADA_HUMAN	R.TVHAGEVGSAEVVK.E	TVHAGEVGSAEVVK	1	0.9573	1	212	225	14	1381.72	3h
sp|P00813|ADA_HUMAN	X.GIALPANTAEGLLNVIGMDKPLTLPDFLAK.X	GIALPANTAEGLLNVIGMDKPLTLPDFLAK	1	1	13	35	64	30	3091.7	3h
sp|P00813|ADA_HUMAN	X.NDQANYSLNTDDPLIFK.X	NDQANYSLNTDDPLIFK	1	1	1	285	301	17	1966.93	3h
sp|P00918|CAH2_HUMAN	R.QSPVDIDTHTAK.Y	QSPVDIDTHTAK	3	0.9458	1	28	39	12	1310.65	3h
sp|P00918|CAH2_HUMAN	K.VVDVLDSIK.T	VVDVLDSIK	1	0.9999	1	159	167	9	986.562	3h
sp|P00918|CAH2_HUMAN	K.AVQQPDGLAVLGIFLK.V	AVQQPDGLAVLGIFLK	1	1	10	133	148	16	1667.96	3h
sp|P00918|CAH2_HUMAN	K.EPISVSSEQVLK.F	EPISVSSEQVLK	1	1	9	213	224	12	1314.7	3h
sp|P01889|1B07_HUMAN	X.DGEDQTQDTELVETR.X	DGEDQTQDTELVETR	30	1	8	244	258	15	1734.76	3h
sp|P01889|1B07_HUMAN	X.DGEDQTQDTELVETRPAGDR.X	DGEDQTQDTELVETRPAGDR	30	1	14	244	263	20	2230.99	3h
sp|P01889|1B07_HUMAN	R.FISVGYVDDTQFVR.F	FISVGYVDDTQFVR	47	1	1	46	59	14	1644.81	3h
sp|P01889|1B07_HUMAN	X.THVTHHPISDHEATLR.X	THVTHHPISDHEATLR	29	1	10	211	226	16	1849.92	3h
sp|P01891|1A68_HUMAN	X.DGEDQTQDTELVETRPAGDGTFQK.X	DGEDQTQDTELVETRPAGDGTFQK	30	1	9	244	267	24	2636.18	3h
sp|P01893|HLAH_HUMAN	X.THMTHHPISDHEATLR.X	THMTHHPISDHEATLR	15	0.9998	2	211	226	16	1881.89	3h
sp|P02533|K1C14_HUMAN	R.APSTYGGGLSVSSSR.F	APSTYGGGLSVSSSR	1	1	3	42	56	15	1424.69	3h
sp|P02533|K1C14_HUMAN	K.ASLENSLEETK.G	ASLENSLEETK	10	1	1	353	363	11	1219.59	3h
sp|P02533|K1C14_HUMAN	R.EVATNSELVQSGK.S	EVATNSELVQSGK	6	1	5	316	328	13	1360.68	3h
sp|P02533|K1C14_HUMAN	R.LLEGEDAHLSSSQFSSGSQSSR.D	LLEGEDAHLSSSQFSSGSQSSR	3	1	3	418	439	22	2308.06	3h
sp|P02545|LMNA_HUMAN	R.VAVEEVDEEGK.F	VAVEEVDEEGK	5	0.9881	2	440	450	11	1202.57	3h
sp|P02545|LMNA_HUMAN	X.MQQQLDEYQELLDIK.X	MQQQLDEYQELLDIK	7	0.9975	1	352	366	15	1892.92	3h
sp|P02786|TFR1_HUMAN	K.AFTYINLDK.A	AFTYINLDK	1	0.9734	1	478	486	9	1083.56	3h
sp|P02786|TFR1_HUMAN	K.LTVSNVLK.E	LTVSNVLK	1	0.9736	2	375	382	8	872.531	3h
sp|P02786|TFR1_HUMAN	X.LTHDVELNLDYER.X	LTHDVELNLDYER	1	0.9753	2	601	613	13	1615.78	3h
sp|P02786|TFR1_HUMAN	X.RLYWDDLK.X	RLYWDDLK	1	0.9877	3	121	128	8	1107.57	3h
sp|P02786|TFR1_HUMAN	R.EEPGEDFPAAR.R	EEPGEDFPAAR	1	0.9989	1	110	120	11	1216.54	3h
sp|P02786|TFR1_HUMAN	R.LTTDFGNAEK.T	LTTDFGNAEK	1	0.999	3	656	665	10	1094.52	3h
sp|P02786|TFR1_HUMAN	K.ILNIFGVIK.G	ILNIFGVIK	1	0.9992	10	386	394	9	1015.64	3h
sp|P02786|TFR1_HUMAN	X.GFVEPDHYVVVGAQR.X	GFVEPDHYVVVGAQR	1	0.9999	12	395	409	15	1671.83	3h
sp|P02786|TFR1_HUMAN	R.LVYLVENPGGYVAYSK.A	LVYLVENPGGYVAYSK	1	0.9999	1	209	224	16	1770.91	3h
sp|P02786|TFR1_HUMAN	K.AVLGTSNFK.V	AVLGTSNFK	1	1	5	487	495	9	935.505	3h
sp|P02786|TFR1_HUMAN	X.DENLALYVENQFR.X	DENLALYVENQFR	1	1	7	162	174	13	1609.77	3h
sp|P02786|TFR1_HUMAN	K.EMGLSLQWLYSAR.G	EMGLSLQWLYSAR	1	1	5	634	646	13	1552.77	3h
sp|P02786|TFR1_HUMAN	K.HPVTGQFLYQDSNWASK.V	HPVTGQFLYQDSNWASK	1	1	13	515	531	17	1976.94	3h
sp|P02786|TFR1_HUMAN	R.HVFWGSGSHTLPALLENLK.L	HVFWGSGSHTLPALLENLK	1	1	21	699	717	19	2105.1	3h
sp|P02786|TFR1_HUMAN	K.LAQMFSDMVLK.D	LAQMFSDMVLK	1	1	10	429	439	11	1281.64	3h
sp|P02786|TFR1_HUMAN	K.LAVDEEENADNNTK.A	LAVDEEENADNNTK	1	1	14	40	53	14	1560.69	3h
sp|P02786|TFR1_HUMAN	K.LLNENSYVPR.E	LLNENSYVPR	1	1	12	146	155	10	1203.62	3h
sp|P02786|TFR1_HUMAN	R.SAFSNLFGGEPLSYTR.F	SAFSNLFGGEPLSYTR	1	1	3	7	22	16	1744.84	3h
sp|P02786|TFR1_HUMAN	K.VANAESLNAIGVLIYMDQTK.F	VANAESLNAIGVLIYMDQTK	1	1	7	268	287	20	2149.11	3h
sp|P02786|TFR1_HUMAN	R.VEYHFLSPYVSPK.E	VEYHFLSPYVSPK	1	1	8	681	693	13	1564.79	3h
sp|P02786|TFR1_HUMAN	K.VSASPLLYTLIEK.T	VSASPLLYTLIEK	1	1	10	496	508	13	1432.82	3h
sp|P03905|NU4M_HUMAN	K.LIVPTIMLLPLTWLSK.K	LIVPTIMLLPLTWLSK	2	1	10	4	19	16	1837.11	3h
sp|P04040|CATA_HUMAN	X.VWPHKDYPLIPVGK.X	VWPHKDYPLIPVGK	1	0.9872	1	302	315	14	1647.91	3h
sp|P04040|CATA_HUMAN	R.DLFNAIATGK.Y	DLFNAIATGK	1	0.9891	2	264	273	10	1048.55	3h
sp|P04040|CATA_HUMAN	R.DPILFPSFIHSQK.R	DPILFPSFIHSQK	1	0.9897	1	157	169	13	1527.81	3h
sp|P04040|CATA_HUMAN	X.DAQIFIQK.X	DAQIFIQK	1	0.9966	7	469	476	8	961.522	3h
sp|P04040|CATA_HUMAN	R.LFAYPDTHR.H	LFAYPDTHR	1	0.9984	10	355	363	9	1118.55	3h
sp|P04040|CATA_HUMAN	K.NLSVEDAAR.L	NLSVEDAAR	1	0.999	5	244	252	9	973.482	3h
sp|P04040|CATA_HUMAN	X.LSQEDPDYGIR.X	LSQEDPDYGIR	1	0.9995	7	253	263	11	1291.6	3h
sp|P04040|CATA_HUMAN	K.ADVLTTGAGNPVGDK.L	ADVLTTGAGNPVGDK	1	1	10	24	38	15	1413.71	3h
sp|P04040|CATA_HUMAN	R.AFYVNVLNEEQR.K	AFYVNVLNEEQR	1	1	3	445	456	12	1480.73	3h
sp|P04040|CATA_HUMAN	R.DPASDQMQHWK.E	DPASDQMQHWK	1	1	3	6	16	11	1341.58	3h
sp|P04040|CATA_HUMAN	K.DPDMVWDFWSLRPESLHQVSFLFSDR.G	DPDMVWDFWSLRPESLHQVSFLFSDR	1	1	2	178	203	26	3208.51	3h
sp|P04040|CATA_HUMAN	R.FNTANDDNVTQVR.A	FNTANDDNVTQVR	1	1	1	432	444	13	1492.69	3h
sp|P04040|CATA_HUMAN	R.FSTVAGESGSADTVR.D	FSTVAGESGSADTVR	1	1	5	113	127	15	1482.69	3h
sp|P04040|CATA_HUMAN	K.FYTEDGNWDLVGNNTPIFFIR.D	FYTEDGNWDLVGNNTPIFFIR	1	1	5	136	156	21	2517.19	3h
sp|P04040|CATA_HUMAN	K.LNVITVGPR.G	LNVITVGPR	1	1	7	39	47	9	967.58	3h
sp|P04040|CATA_HUMAN	K.NAIHTFVQSGSHLAAR.E	NAIHTFVQSGSHLAAR	1	1	3	507	522	16	1707.88	3h
sp|P04040|CATA_HUMAN	K.NFTEVHPDYGSHIQALLDK.Y	NFTEVHPDYGSHIQALLDK	1	1	5	481	499	19	2183.06	3h
sp|P04040|CATA_HUMAN	R.NPVNYFAEVEQIAFDPSNMPPGIEASPDK.M	NPVNYFAEVEQIAFDPSNMPPGIEASPDK	1	1	7	321	349	29	3175.48	3h
sp|P04075|ALDOA_HUMAN	R.LQSIGTENTEENRR.F	LQSIGTENTEENRR	1	0.981	4	44	57	14	1645.8	3h
sp|P04075|ALDOA_HUMAN	R.ALQASALK.A	ALQASALK	1	0.9877	9	305	312	8	800.474	3h
sp|P04075|ALDOA_HUMAN	R.ALANSLACQGK.Y	ALANSLACQGK	1	0.9974	1	332	342	11	1074.55	3h
sp|P04075|ALDOA_HUMAN	R.VNPCIGGVILFHETLYQK.A	VNPCIGGVILFHETLYQK	1	0.9983	8	70	87	18	2030.06	3h
sp|P04075|ALDOA_HUMAN	K.ADDGRPFPQVIK.S	ADDGRPFPQVIK	1	0.9989	9	88	99	12	1341.7	3h
sp|P04075|ALDOA_HUMAN	K.AAQEEYVKR.A	AAQEEYVKR	1	0.9991	1	323	331	9	1092.56	3h
sp|P04075|ALDOA_HUMAN	X.PYQYPALTPEQK.X	PYQYPALTPEQK	1	0.9999	27	2	13	12	1433.72	3h
sp|P04075|ALDOA_HUMAN	K.ELSDIAHR.I	ELSDIAHR	1	1	38	15	22	8	939.477	3h
sp|P04075|ALDOA_HUMAN	K.FSHEEIAMATVTALR.R	FSHEEIAMATVTALR	1	1	37	244	258	15	1674.84	3h
sp|P04075|ALDOA_HUMAN	K.GILAADESTGSIAK.R	GILAADESTGSIAK	1	1	18	29	42	14	1331.69	3h
sp|P04075|ALDOA_HUMAN	K.GVVPLAGTNGETTTQGLDGLSER.C	GVVPLAGTNGETTTQGLDGLSER	1	1	24	112	134	23	2271.13	3h
sp|P04075|ALDOA_HUMAN	K.IGEHTPSALAIMENANVLAR.Y	IGEHTPSALAIMENANVLAR	1	1	40	154	173	20	2106.09	3h
sp|P04075|ALDOA_HUMAN	R.LQSIGTENTEENR.R	LQSIGTENTEENR	1	1	15	44	56	13	1489.7	3h
sp|P04075|ALDOA_HUMAN	R.QLLLTADDR.V	QLLLTADDR	1	1	6	61	69	9	1043.56	3h
sp|P04075|ALDOA_HUMAN	R.TVPPAVTGITFLSGGQSEEEASINLNAINK.C	TVPPAVTGITFLSGGQSEEEASINLNAINK	1	1	13	260	289	30	3056.57	3h
sp|P04075|ALDOA_HUMAN	K.VDKGVVPLAGTNGETTTQGLDGLSER.C	VDKGVVPLAGTNGETTTQGLDGLSER	1	1	1	109	134	26	2613.32	3h
sp|P04075|ALDOA_HUMAN	K.YTPSGQAGAAASESLFVSNHAY.-	YTPSGQAGAAASESLFVSNHAY	1	1	9	343	364	22	2227.02	3h
sp|P04080|CYTB_HUMAN	X.VFQSLPHENKPLTLSNYQTNK.X	VFQSLPHENKPLTLSNYQTNK	2	0.9991	2	69	89	21	2457.26	3h
sp|P04080|CYTB_HUMAN	K.SQVVAGTNYFIK.V	SQVVAGTNYFIK	2	1	9	45	56	12	1325.69	3h
sp|P04083|ANXA1_HUMAN	R.SEIDMNDIK.A	SEIDMNDIK	2	0.9974	5	304	312	9	1063.48	3h
sp|P04083|ANXA1_HUMAN	K.ALTGHLEEVVLALLK.T	ALTGHLEEVVLALLK	4	1	1	99	113	15	1604.95	3h
sp|P04083|ANXA1_HUMAN	K.DITSDTSGDFR.N	DITSDTSGDFR	3	1	3	167	177	11	1212.53	3h
sp|P04083|ANXA1_HUMAN	K.GGPGSAVSPYPTFNPSSDVAALHK.A	GGPGSAVSPYPTFNPSSDVAALHK	4	1	6	30	53	24	2355.15	3h
sp|P04083|ANXA1_HUMAN	K.GLGTDEDTLIEILASR.T	GLGTDEDTLIEILASR	3	1	17	129	144	16	1701.88	3h
sp|P04083|ANXA1_HUMAN	K.GTDVNVFNTILTTR.S	GTDVNVFNTILTTR	2	1	11	215	228	14	1549.81	3h
sp|P04083|ANXA1_HUMAN	X.GVDEATIIDILTK.X	GVDEATIIDILTK	4	1	7	59	71	13	1386.76	3h
sp|P04083|ANXA1_HUMAN	K.QAWFIENEEQEYVQTVK.S	QAWFIENEEQEYVQTVK	4	1	2	10	26	17	2140.01	3h
sp|P04083|ANXA1_HUMAN	R.SEDFGVNEDLADSDAR.A	SEDFGVNEDLADSDAR	2	1	5	189	204	16	1738.73	3h
sp|P04083|ANXA1_HUMAN	K.TPAQFDADELR.A	TPAQFDADELR	3	1	7	114	124	11	1261.59	3h
sp|P04183|KITH_HUMAN	R.KPFGAILNLVPLAESVVK.L	KPFGAILNLVPLAESVVK	1	0.9899	3	131	148	18	1894.12	3h
sp|P04222|1C03_HUMAN	X.SWTAADTAAQITQR.X	SWTAADTAAQITQR	30	0.9998	6	156	169	14	1518.74	3h
sp|P04259|K2C6B_HUMAN	R.QNLEPLFEQYINNLR.R	QNLEPLFEQYINNLR	19	0.9992	1	208	222	15	1889.96	3h
sp|P04264|K2C1_HUMAN	R.NKYEDEINKR.T	NKYEDEINKR	27	0.9881	7	268	277	10	1307.64	3h
sp|P04264|K2C1_HUMAN	K.NKLNDLEDALQQAKEDLAR.L	NKLNDLEDALQQAKEDLAR	2	0.9885	2	442	460	19	2183.12	3h
sp|P04264|K2C1_HUMAN	R.SLVNLGGSK.S	SLVNLGGSK	2	0.9978	2	66	74	9	873.489	3h
sp|P04264|K2C1_HUMAN	K.DVDGAYMTK.V	DVDGAYMTK	4	0.9983	1	290	298	9	998.435	3h
sp|P04264|K2C1_HUMAN	K.YEDEINKR.T	YEDEINKR	38	0.9991	2	270	277	8	1065.51	3h
sp|P04264|K2C1_HUMAN	R.GGGGGGYGSGGSSYGSGGGSYGSGGGGGGGR.G	GGGGGGYGSGGSSYGSGGGSYGSGGGGGGGR	3	1	6	519	549	31	2382.93	3h
sp|P04264|K2C1_HUMAN	K.QISNLQQSISDAEQR.G	QISNLQQSISDAEQR	4	1	5	418	432	15	1715.85	3h
sp|P04264|K2C1_HUMAN	K.SKAEAESLYQSK.Y	SKAEAESLYQSK	4	1	9	365	376	12	1339.66	3h
sp|P04264|K2C1_HUMAN	K.SLNNQFASFIDK.V	SLNNQFASFIDK	3	1	10	186	197	12	1382.68	3h
sp|P04264|K2C1_HUMAN	R.THNLEPYFESFINNLR.R	THNLEPYFESFINNLR	3	1	13	224	239	16	1992.97	3h
sp|P04264|K2C1_HUMAN	R.TNAENEFVTIK.K	TNAENEFVTIK	4	1	5	278	288	11	1264.63	3h
sp|P04264|K2C1_HUMAN	K.YEELQITAGR.H	YEELQITAGR	6	1	7	377	386	10	1178.59	3h
sp|P04350|TBB4_HUMAN	K.MAATFIGNSTAIQELFK.R	MAATFIGNSTAIQELFK	3	0.9705	1	363	379	17	1840.94	3h
sp|P04350|TBB4_HUMAN	X.ALTVPELTQQMFDAK.X	ALTVPELTQQMFDAK	5	1	9	283	297	15	1690.86	3h
sp|P04350|TBB4_HUMAN	X.AVLVDLEPGTMDSVR.X	AVLVDLEPGTMDSVR	6	1	15	63	77	15	1600.81	3h
sp|P04350|TBB4_HUMAN	X.FWEVISDEHGIDPTGTYHGDSDLQLER.X	FWEVISDEHGIDPTGTYHGDSDLQLER	3	1	4	20	46	27	3115.41	3h
sp|P04350|TBB4_HUMAN	X.ISEQFTAMFR.X	ISEQFTAMFR	14	1	31	381	390	10	1228.59	3h
sp|P04350|TBB4_HUMAN	X.LTTPTYGDLNHLVSATMSGVTTCLR.X	LTTPTYGDLNHLVSATMSGVTTCLR	9	1	10	217	241	25	2650.31	3h
sp|P04350|TBB4_HUMAN	X.NSSYFVEWIPNNVK.X	NSSYFVEWIPNNVK	16	1	32	337	350	14	1695.82	3h
sp|P04350|TBB4_HUMAN	X.SGPFGQIFRPDNFVFGQSGAGNNWAK.X	SGPFGQIFRPDNFVFGQSGAGNNWAK	10	1	38	78	103	26	2797.33	3h
sp|P04406|G3P_HUMAN	K.VIPELNGK.L	VIPELNGK	4	0.9861	2	220	227	8	868.5	3h
sp|P04406|G3P_HUMAN	K.VIHDNFGIVEGLMTTVHAITATQKTVDGPSGK.L	VIHDNFGIVEGLMTTVHAITATQKTVDGPSGK	3	0.9869	1	163	194	32	3335.71	3h
sp|P04406|G3P_HUMAN	K.LVINGNPITIFQERDPSK.I	LVINGNPITIFQERDPSK	3	0.9998	4	67	84	18	2040.1	3h
sp|P04406|G3P_HUMAN	R.GALQNIIPASTGAAK.A	GALQNIIPASTGAAK	4	1	20	201	215	15	1410.78	3h
sp|P04406|G3P_HUMAN	K.GILGYTEHQVVSSDFNSDTHSSTFDAGAGIALNDHFVK.L	GILGYTEHQVVSSDFNSDTHSSTFDAGAGIALNDHFVK	4	1	62	272	309	38	4035.88	3h
sp|P04406|G3P_HUMAN	K.LISWYDNEFGYSNR.V	LISWYDNEFGYSNR	4	1	56	310	323	14	1762.79	3h
sp|P04406|G3P_HUMAN	K.LVINGNPITIFQER.D	LVINGNPITIFQER	3	1	37	67	80	14	1612.89	3h
sp|P04406|G3P_HUMAN	K.RVIISAPSADAPMFVMGVNHEK.Y	RVIISAPSADAPMFVMGVNHEK	4	1	10	118	139	22	2368.2	3h
sp|P04406|G3P_HUMAN	K.VDIVAINDPFIDLNYMVYMFQYDSTHGK.F	VDIVAINDPFIDLNYMVYMFQYDSTHGK	2	1	19	28	55	28	3307.55	3h
sp|P04406|G3P_HUMAN	K.VIHDNFGIVEGLMTTVHAITATQK.T	VIHDNFGIVEGLMTTVHAITATQK	3	1	72	163	186	24	2594.35	3h
sp|P04406|G3P_HUMAN	R.VIISAPSADAPMFVMGVNHEK.Y	VIISAPSADAPMFVMGVNHEK	4	1	21	119	139	21	2212.1	3h
sp|P04406|G3P_HUMAN	R.VPTANVSVVDLTCR.L	VPTANVSVVDLTCR	4	1	11	235	248	14	1472.76	3h
sp|P04406|G3P_HUMAN	R.VVDLMAHMASK.E	VVDLMAHMASK	4	1	11	324	334	11	1200.6	3h
sp|P04406|G3P_HUMAN	R.VVDLMAHMASKE.-	VVDLMAHMASKE	4	1	18	324	335	12	1329.64	3h
sp|P04406|G3P_HUMAN	K.WGDAGAEYVVESTGVFTTMEK.A	WGDAGAEYVVESTGVFTTMEK	4	1	65	87	107	21	2276.03	3h
sp|P04632|CPNS1_HUMAN	R.ILGGVISAISEAAAQYNPEPPPPR.T	ILGGVISAISEAAAQYNPEPPPPR	1	1	1	61	84	24	2446.28	3h
sp|P04632|CPNS1_HUMAN	R.LFAQLAGDDMEVSATELMNILNK.V	LFAQLAGDDMEVSATELMNILNK	1	1	7	104	126	23	2522.24	3h
sp|P04818|TYSY_HUMAN	R.EEGDLGPVYGFQWR.H	EEGDLGPVYGFQWR	3	1	2	127	140	14	1651.76	3h
sp|P04818|TYSY_HUMAN	K.GVLEELLWFIK.G	GVLEELLWFIK	3	1	8	83	93	11	1345.76	3h
sp|P04843|RPN1_HUMAN	K.IDHILDAL.-	IDHILDAL	2	0.9992	11	600	607	8	908.496	3h
sp|P04843|RPN1_HUMAN	X.APDELHYTYLDTFGRPVIVAYK.X	APDELHYTYLDTFGRPVIVAYK	2	0.9993	4	392	413	22	2567.3	3h
sp|P04843|RPN1_HUMAN	R.TVDLSSHLAK.V	TVDLSSHLAK	1	0.9999	8	39	48	10	1069.58	3h
sp|P04843|RPN1_HUMAN	K.ALTSEIALLQSR.L	ALTSEIALLQSR	2	1	10	525	536	12	1300.73	3h
sp|P04843|RPN1_HUMAN	R.ATSFLLALEPELEAR.L	ATSFLLALEPELEAR	1	1	13	66	80	15	1658.89	3h
sp|P04843|RPN1_HUMAN	R.DVPAYSQDTFK.V	DVPAYSQDTFK	2	1	3	205	215	11	1269.59	3h
sp|P04843|RPN1_HUMAN	R.FPLFGGWK.T	FPLFGGWK	2	1	10	320	327	8	950.498	3h
sp|P04843|RPN1_HUMAN	X.FVDHVFDEQVIDSLTVK.X	FVDHVFDEQVIDSLTVK	2	1	3	355	371	17	1990	3h
sp|P04843|RPN1_HUMAN	K.GEDEEENNLEVR.E	GEDEEENNLEVR	1	1	13	90	101	12	1431.61	3h
sp|P04843|RPN1_HUMAN	K.ISVIVETVYTHVLHPYPTQITQSEK.Q	ISVIVETVYTHVLHPYPTQITQSEK	1	1	8	127	151	25	2881.52	3h
sp|P04843|RPN1_HUMAN	X.LAHLGVQVK.X	LAHLGVQVK	1	1	12	81	89	9	963.584	3h
sp|P04843|RPN1_HUMAN	K.LPVALDPGAK.I	LPVALDPGAK	1	1	10	117	126	10	979.568	3h
sp|P04843|RPN1_HUMAN	K.NLVEQHIQDIVVHYTFNK.V	NLVEQHIQDIVVHYTFNK	2	1	2	415	432	18	2196.13	3h
sp|P04843|RPN1_HUMAN	X.QFVVFEGNHYFYSPYPTK.X	QFVVFEGNHYFYSPYPTK	1	1	3	152	169	18	2222.04	3h
sp|P04843|RPN1_HUMAN	R.SEDLLDYGPFR.D	SEDLLDYGPFR	2	1	14	194	204	11	1310.61	3h
sp|P04843|RPN1_HUMAN	X.THYIVGYNLPSYEYLYNLGDQYALK.X	THYIVGYNLPSYEYLYNLGDQYALK	2	1	3	328	352	25	2996.46	3h
sp|P04843|RPN1_HUMAN	K.TILPAAAQDVYYR.D	TILPAAAQDVYYR	2	1	2	282	294	13	1479.77	3h
sp|P04843|RPN1_HUMAN	K.VTAEVVLAHLGGGSTSR.A	VTAEVVLAHLGGGSTSR	1	1	1	49	65	17	1652.88	3h
sp|P04844|RPN2_HUMAN	K.QEIQHLFR.E	QEIQHLFR	4	0.9853	2	524	531	8	1069.57	3h
sp|P04844|RPN2_HUMAN	K.DLLLAAVSEDSSVTQIYHAVAALSGFGLPLASQEALSALTAR.L	DLLLAAVSEDSSVTQIYHAVAALSGFGLPLASQEALSALTAR	4	0.9991	6	110	151	42	4255.23	3h
sp|P04844|RPN2_HUMAN	X.EETVLATVQALQTASHLSQQADLR.X	EETVLATVQALQTASHLSQQADLR	2	0.9992	3	155	178	24	2608.35	3h
sp|P04844|RPN2_HUMAN	X.ISTEVGITNVDLSTVDKDQSIAPK.X	ISTEVGITNVDLSTVDKDQSIAPK	5	0.9992	2	369	392	24	2529.32	3h
sp|P04844|RPN2_HUMAN	K.ASLDRPFTNLESAFYSIVGLSSLGAQVPDAK.K	ASLDRPFTNLESAFYSIVGLSSLGAQVPDAK	4	1	15	39	69	31	3252.66	3h
sp|P04844|RPN2_HUMAN	K.EDQVIQLMNAIFSK.K	EDQVIQLMNAIFSK	7	1	11	230	243	14	1634.83	3h
sp|P04844|RPN2_HUMAN	K.FPEEEAPSTVLSQNLFTPK.Q	FPEEEAPSTVLSQNLFTPK	6	1	10	505	523	19	2133.06	3h
sp|P04844|RPN2_HUMAN	R.LQVTNVLSQPLTQATVK.L	LQVTNVLSQPLTQATVK	6	1	4	290	306	17	1839.05	3h
sp|P04844|RPN2_HUMAN	X.LSKEETVLATVQALQTASHLSQQADLR.X	LSKEETVLATVQALQTASHLSQQADLR	2	1	4	152	178	27	2936.56	3h
sp|P04844|RPN2_HUMAN	K.NPILWNVADVVIK.F	NPILWNVADVVIK	6	1	9	492	504	13	1479.84	3h
sp|P04844|RPN2_HUMAN	K.NPILWNVADVVIKFPEEEAPSTVLSQNLFTPK.Q	NPILWNVADVVIKFPEEEAPSTVLSQNLFTPK	6	1	2	492	523	32	3594.89	3h
sp|P04844|RPN2_HUMAN	R.SIVEEIEDLVAR.L	SIVEEIEDLVAR	7	1	8	179	190	12	1371.72	3h
sp|P04844|RPN2_HUMAN	K.TGQEVVFVAEPDNK.N	TGQEVVFVAEPDNK	5	1	10	443	456	14	1531.75	3h
sp|P04844|RPN2_HUMAN	K.TSFTPVGDVFELNFMNVK.F	TSFTPVGDVFELNFMNVK	3	1	6	323	340	18	2043.99	3h
sp|P04844|RPN2_HUMAN	X.YHVPVVVVPEGSASDTHEQAILR.X	YHVPVVVVPEGSASDTHEQAILR	6	1	15	267	289	23	2502.28	3h
sp|P04899|GNAI2_HUMAN	R.AVVYSNTIQSIMAIVK.A	AVVYSNTIQSIMAIVK	4	1	3	71	86	16	1735.95	3h
sp|P04899|GNAI2_HUMAN	R.EYQLNDSAAYYLNDLER.I	EYQLNDSAAYYLNDLER	4	1	10	146	162	17	2075.94	3h
sp|P04899|GNAI2_HUMAN	R.IAQSDYIPTQQDVLR.T	IAQSDYIPTQQDVLR	4	1	6	163	177	15	1745.89	3h
sp|P04899|GNAI2_HUMAN	K.WFTDTSIILFLNK.K	WFTDTSIILFLNK	6	1	7	259	271	13	1596.85	3h
sp|P04899|GNAI2_HUMAN	K.YDEAASYIQSK.F	YDEAASYIQSK	4	1	3	297	307	11	1273.58	3h
sp|P04908|H2A1B_HUMAN	X.AGLQFPVGR.X	AGLQFPVGR	22	1	23	22	30	9	943.522	3h
sp|P04908|H2A1B_HUMAN	R.VGAGAPVYLAAVLEYLTAEILELAGNAAR.D	VGAGAPVYLAAVLEYLTAEILELAGNAAR	14	1	5	44	72	29	2914.58	3h
sp|P04908|H2A1B_HUMAN	X.VTIAQGGVLPNIQAVLLPK.X	VTIAQGGVLPNIQAVLLPK	13	1	102	101	119	19	1930.16	3h
sp|P05023|AT1A1_HUMAN	R.DKYEPAAVSEQGDKK.G	DKYEPAAVSEQGDKK	2	0.9755	2	8	22	15	1663.8	3h
sp|P05023|AT1A1_HUMAN	K.EQPLDEELKDAFQNAYLELGGLGER.V	EQPLDEELKDAFQNAYLELGGLGER	2	0.99	1	527	551	25	2833.38	3h
sp|P05023|AT1A1_HUMAN	R.DGPNALTPPPTTPEWIK.F	DGPNALTPPPTTPEWIK	4	0.991	1	75	91	17	1832.93	3h
sp|P05023|AT1A1_HUMAN	K.NMVPQQALVIR.N	NMVPQQALVIR	9	0.9974	1	163	173	11	1267.71	3h
sp|P05023|AT1A1_HUMAN	X.LSLDELHR.X	LSLDELHR	4	0.9989	1	46	53	8	981.524	3h
sp|P05023|AT1A1_HUMAN	R.LNIPVSQVNPR.D	LNIPVSQVNPR	3	0.9991	6	648	658	11	1235.7	3h
sp|P05023|AT1A1_HUMAN	R.AVFQANQENLPILK.R	AVFQANQENLPILK	2	1	3	431	444	14	1583.87	3h
sp|P05023|AT1A1_HUMAN	K.DMTSEQLDDILK.Y	DMTSEQLDDILK	1	1	4	672	683	12	1406.66	3h
sp|P05023|AT1A1_HUMAN	K.GVGIISEGNETVEDIAAR.L	GVGIISEGNETVEDIAAR	6	1	13	630	647	18	1828.91	3h
sp|P05023|AT1A1_HUMAN	R.QGAIVAVTGDGVNDSPALK.K	QGAIVAVTGDGVNDSPALK	6	1	3	708	726	19	1810.94	3h
sp|P05023|AT1A1_HUMAN	X.SPDFTNENPLETR.X	SPDFTNENPLETR	2	1	5	228	240	13	1518.7	3h
sp|P05023|AT1A1_HUMAN	K.VDNSSLTGESEPQTR.S	VDNSSLTGESEPQTR	7	1	13	213	227	15	1618.74	3h
sp|P05107|ITB2_HUMAN	K.LGAILTPNDGR.C	LGAILTPNDGR	2	0.9846	2	275	285	11	1125.61	3h
sp|P05109|S10A8_HUMAN	X.ALNSIIDVYHK.X	ALNSIIDVYHK	1	0.9931	3	8	18	11	1271.68	3h
sp|P05114|HMGN1_HUMAN	X.QAEVANQETKEDLPAENGETK.X	QAEVANQETKEDLPAENGETK	4	1	5	62	82	21	2300.08	3h
sp|P05114|HMGN1_HUMAN	K.TEESPASDEAGEK.E	TEESPASDEAGEK	5	1	9	83	95	13	1348.56	3h
sp|P05141|ADT2_HUMAN	K.QIFLGGVDKR.T	QIFLGGVDKR	1	0.928	1	97	106	10	1131.64	3h
sp|P05141|ADT2_HUMAN	X.GMGGAFVLVLYDEIKK.X	GMGGAFVLVLYDEIKK	2	0.9892	14	281	296	16	1738.93	3h
sp|P05141|ADT2_HUMAN	K.EQGVLSFWR.G	EQGVLSFWR	3	0.9991	6	64	72	9	1120.57	3h
sp|P05141|ADT2_HUMAN	R.AAYFGIYDTAK.G	AAYFGIYDTAK	1	1	2	189	199	11	1218.59	3h
sp|P05141|ADT2_HUMAN	K.DFLAGGVAAAISK.T	DFLAGGVAAAISK	1	1	4	11	23	13	1218.66	3h
sp|P05141|ADT2_HUMAN	R.YFPTQALNFAFK.D	YFPTQALNFAFK	5	1	7	81	92	12	1445.73	3h
sp|P05164|PERM_HUMAN	R.GLMATPAK.L	GLMATPAK	2	0.9892	1	549	556	8	787.424	3h
sp|P05164|PERM_HUMAN	R.SRDHGLPGYNAWR.R	SRDHGLPGYNAWR	2	0.9896	4	591	603	13	1527.73	3h
sp|P05164|PERM_HUMAN	R.KIVGAMVQIITYRDYLPLVLGPTAMR.K	KIVGAMVQIITYRDYLPLVLGPTAMR	1	0.9933	3	448	473	26	2917.62	3h
sp|P05164|PERM_HUMAN	R.RSPTLGASNR.A	RSPTLGASNR	1	0.9952	2	184	193	10	1057.56	3h
sp|P05164|PERM_HUMAN	R.YQPMEPNPR.V	YQPMEPNPR	1	0.9987	10	516	524	9	1130.52	3h
sp|P05164|PERM_HUMAN	R.AVSNEIVR.F	AVSNEIVR	1	0.999	11	229	236	8	886.486	3h
sp|P05164|PERM_HUMAN	K.NQADCIPFFR.S	NQADCIPFFR	1	0.9998	3	305	314	10	1209.56	3h
sp|P05164|PERM_HUMAN	R.AADYLHVALDLLER.K	AADYLHVALDLLER	1	1	53	115	128	14	1597.85	3h
sp|P05164|PERM_HUMAN	R.DFVNCSTLPALNLASWR.E	DFVNCSTLPALNLASWR	1	1	7	726	742	17	1905.94	3h
sp|P05164|PERM_HUMAN	R.DHGLPGYNAWR.R	DHGLPGYNAWR	2	1	16	593	603	11	1284.6	3h
sp|P05164|PERM_HUMAN	R.DYLPLVLGPTAMR.K	DYLPLVLGPTAMR	1	1	12	461	473	13	1444.77	3h
sp|P05164|PERM_HUMAN	R.FCGLPQPETVGQLGTVLR.N	FCGLPQPETVGQLGTVLR	1	1	11	605	622	18	1914	3h
sp|P05164|PERM_HUMAN	R.FPTDQLTPDQER.S	FPTDQLTPDQER	1	1	16	237	248	12	1445.68	3h
sp|P05164|PERM_HUMAN	R.FWWENEGVFSMQQR.Q	FWWENEGVFSMQQR	1	1	50	678	691	14	1842.81	3h
sp|P05164|PERM_HUMAN	R.IANVFTNAFR.Y	IANVFTNAFR	1	1	23	490	499	10	1151.61	3h
sp|P05164|PERM_HUMAN	R.IGLDLPALNMQR.S	IGLDLPALNMQR	1	1	21	579	590	12	1339.73	3h
sp|P05164|PERM_HUMAN	R.IICDNTGITTVSK.N	IICDNTGITTVSK	1	1	9	702	714	13	1363.7	3h
sp|P05164|PERM_HUMAN	R.IPCFLAGDTR.S	IPCFLAGDTR	2	1	1	396	405	10	1091.54	3h
sp|P05164|PERM_HUMAN	K.IVGAMVQIITYR.D	IVGAMVQIITYR	1	1	36	449	460	12	1362.77	3h
sp|P05164|PERM_HUMAN	X.IVGAMVQIITYRDYLPLVLGPTAMR.X	IVGAMVQIITYRDYLPLVLGPTAMR	1	1	1	449	473	25	2789.53	3h
sp|P05164|PERM_HUMAN	R.KIVGAMVQIITYR.D	KIVGAMVQIITYR	1	1	23	448	460	13	1490.86	3h
sp|P05164|PERM_HUMAN	R.KLMEQYGTPNNIDIWMGGVSEPLK.R	KLMEQYGTPNNIDIWMGGVSEPLK	1	1	17	629	652	24	2719.33	3h
sp|P05164|PERM_HUMAN	R.KLMEQYGTPNNIDIWMGGVSEPLKR.K	KLMEQYGTPNNIDIWMGGVSEPLKR	1	1	28	629	653	25	2875.43	3h
sp|P05164|PERM_HUMAN	K.LMEQYGTPNNIDIWMGGVSEPLK.R	LMEQYGTPNNIDIWMGGVSEPLK	1	1	13	630	652	23	2591.24	3h
sp|P05164|PERM_HUMAN	K.LMEQYGTPNNIDIWMGGVSEPLKR.K	LMEQYGTPNNIDIWMGGVSEPLKR	1	1	8	630	653	24	2747.34	3h
sp|P05164|PERM_HUMAN	K.NNIFMSNSYPR.D	NNIFMSNSYPR	1	1	30	715	725	11	1341.61	3h
sp|P05164|PERM_HUMAN	R.NQINALTSFVDASMVYGSEEPLAR.N	NQINALTSFVDASMVYGSEEPLAR	1	1	30	328	351	24	2611.26	3h
sp|P05164|PERM_HUMAN	R.QALAQISLPR.I	QALAQISLPR	1	1	18	692	701	10	1095.64	3h
sp|P05164|PERM_HUMAN	R.QNQIAVDEIR.E	QNQIAVDEIR	1	1	13	560	569	10	1184.62	3h
sp|P05164|PERM_HUMAN	R.SGSASPMELLSYFK.Q	SGSASPMELLSYFK	1	1	13	90	103	14	1515.72	3h
sp|P05164|PERM_HUMAN	R.SLMFMQWGQLLDHDLDFTPEPAAR.A	SLMFMQWGQLLDHDLDFTPEPAAR	1	1	59	249	272	24	2817.32	3h
sp|P05164|PERM_HUMAN	X.SSEMPELTSMHTLLLR.X	SSEMPELTSMHTLLLR	1	1	28	406	421	16	1843.92	3h
sp|P05164|PERM_HUMAN	R.VGPLLACIIGTQFR.K	VGPLLACIIGTQFR	1	1	17	657	670	14	1486.83	3h
sp|P05164|PERM_HUMAN	R.VVLEGGIDPILR.G	VVLEGGIDPILR	1	1	18	537	548	12	1279.75	3h
sp|P05164|PERM_HUMAN	R.WLPAEYEDGFSLPYGWTPGVK.R	WLPAEYEDGFSLPYGWTPGVK	1	1	15	198	218	21	2411.14	3h
sp|P05198|IF2A_HUMAN	R.EVLINNINR.R	EVLINNINR	2	0.9989	1	174	182	9	1083.6	3h
sp|P05198|IF2A_HUMAN	R.TEGLSVLSQAMAVIK.E	TEGLSVLSQAMAVIK	2	1	10	245	259	15	1545.84	3h
sp|P05198|IF2A_HUMAN	K.VVTDTDETELAR.Q	VVTDTDETELAR	2	1	12	277	288	12	1347.65	3h
sp|P05204|HMGN2_HUMAN	X.PAPPKPEPK.X	PAPPKPEPK	2	0.9042	1	32	40	9	959.543	3h
sp|P05386|RLA1_HUMAN	-.MASVSELACIYSALILHDDEVTVTEDK.I	MASVSELACIYSALILHDDEVTVTEDK	1	0.9459	1	1	27	27	2951.41	3h
sp|P05386|RLA1_HUMAN	K.AAGVNVEPFWPGLFAK.A	AAGVNVEPFWPGLFAK	1	1	13	34	49	16	1701.88	3h
sp|P05387|RLA2_HUMAN	K.ILDSVGIEADDDR.L	ILDSVGIEADDDR	2	1	6	26	38	13	1416.67	3h
sp|P05387|RLA2_HUMAN	K.ILDSVGIEADDDRLNK.V	ILDSVGIEADDDRLNK	2	1	28	26	41	16	1771.89	3h
sp|P05387|RLA2_HUMAN	K.KILDSVGIEADDDRLNK.V	KILDSVGIEADDDRLNK	2	1	5	25	41	17	1899.99	3h
sp|P05387|RLA2_HUMAN	K.LASVPAGGAVAVSAAPGSAAPAAGSAPAAAEEK.K	LASVPAGGAVAVSAAPGSAAPAAGSAPAAAEEK	2	1	21	62	94	33	2773.42	3h
sp|P05387|RLA2_HUMAN	K.NIEDVIAQGIGK.L	NIEDVIAQGIGK	2	1	5	50	61	12	1255.67	3h
sp|P05387|RLA2_HUMAN	R.YVASYLLAALGGNSSPSAK.D	YVASYLLAALGGNSSPSAK	2	1	20	3	21	19	1867.96	3h
sp|P05388|RLA0_HUMAN	K.AFLADPSAFVAAAPVAAATTAAPAAAAAPAK.V	AFLADPSAFVAAAPVAAATTAAPAAAAAPAK	2	1	15	267	297	31	2751.46	3h
sp|P05388|RLA0_HUMAN	R.GHLENNPALEK.L	GHLENNPALEK	3	1	11	67	77	11	1220.61	3h
sp|P05388|RLA0_HUMAN	X.GNVGFVFTK.X	GNVGFVFTK	2	1	12	84	92	9	967.509	3h
sp|P05388|RLA0_HUMAN	R.GTIEILSDVQLIK.T	GTIEILSDVQLIK	2	1	10	150	162	13	1427.82	3h
sp|P05388|RLA0_HUMAN	K.IIQLLDDYPK.C	IIQLLDDYPK	3	1	6	17	26	10	1216.67	3h
sp|P05388|RLA0_HUMAN	R.VLALSVETDYTFPLAEK.V	VLALSVETDYTFPLAEK	2	1	6	248	264	17	1894.99	3h
sp|P05455|LA_HUMAN	K.ETDLLILFK.D	ETDLLILFK	2	0.9974	1	177	185	9	1090.63	3h
sp|P05455|LA_HUMAN	K.GQVLNIQMR.R	GQVLNIQMR	4	0.9987	1	135	143	9	1057.57	3h
sp|P05455|LA_HUMAN	K.LDEGWVPLEIMIK.F	LDEGWVPLEIMIK	4	0.9987	1	42	54	13	1541.81	3h
sp|P05455|LA_HUMAN	R.SPSKPLPEVTDEYKNDVK.N	SPSKPLPEVTDEYKNDVK	5	0.9989	2	92	109	18	2045.03	3h
sp|P05455|LA_HUMAN	K.EVTWEVLEGEVEK.E	EVTWEVLEGEVEK	2	1	15	300	312	13	1545.76	3h
sp|P05455|LA_HUMAN	X.GFPTDATLDDIKEWLEDK.X	GFPTDATLDDIKEWLEDK	4	1	18	117	134	18	2092	3h
sp|P05455|LA_HUMAN	K.GSIFVVFDSIESAK.K	GSIFVVFDSIESAK	4	1	2	152	165	14	1497.77	3h
sp|P05455|LA_HUMAN	K.IIEDQQESLNK.W	IIEDQQESLNK	2	1	7	318	328	11	1315.66	3h
sp|P05455|LA_HUMAN	R.LTTDFNVIVEALSK.S	LTTDFNVIVEALSK	5	1	15	61	74	14	1548.84	3h
sp|P05455|LA_HUMAN	K.SKAELMEISEDK.T	SKAELMEISEDK	5	1	1	75	86	12	1378.66	3h
sp|P05455|LA_HUMAN	K.SKAELMEISEDKTK.I	SKAELMEISEDKTK	5	1	6	75	88	14	1607.81	3h
sp|P05455|LA_HUMAN	K.YKETDLLILFK.D	YKETDLLILFK	2	1	10	175	185	11	1381.78	3h
sp|P06132|DCUP_HUMAN	R.ILTDALVPYLVGQVVAGAQALQLFESHAGHLGPQLFNK.F	ILTDALVPYLVGQVVAGAQALQLFESHAGHLGPQLFNK	1	0.9477	2	194	231	38	4014.17	3h
sp|P06132|DCUP_HUMAN	R.LRDPEVVASELGYVFQAITLTR.Q	LRDPEVVASELGYVFQAITLTR	2	1	12	121	142	22	2476.33	3h
sp|P06396|GELS_HUMAN	K.TPSAAYLWVGTGASEAEK.T	TPSAAYLWVGTGASEAEK	7	1	1	598	615	18	1836.89	3h
sp|P06400|RB_HUMAN	R.IMESLAWLSDSPLFDLIK.Q	IMESLAWLSDSPLFDLIK	1	0.9982	1	557	574	18	2077.08	3h
sp|P06454|PTMA_HUMAN	R.AAEDDEDDDVDTK.K	AAEDDEDDDVDTK	8	1	11	91	103	13	1436.54	3h
sp|P06454|PTMA_HUMAN	R.AAEDDEDDDVDTKK.Q	AAEDDEDDDVDTKK	8	1	17	91	104	14	1564.64	3h
sp|P06454|PTMA_HUMAN	K.EVVEEAENGR.D	EVVEEAENGR	5	1	34	22	31	10	1130.52	3h
sp|P06454|PTMA_HUMAN	K.KEVVEEAENGR.D	KEVVEEAENGR	5	1	9	21	31	11	1258.61	3h
sp|P06454|PTMA_HUMAN	K.RAAEDDEDDDVDTK.K	RAAEDDEDDDVDTK	8	1	6	90	103	14	1592.64	3h
sp|P06454|PTMA_HUMAN	K.RAAEDDEDDDVDTKK.Q	RAAEDDEDDDVDTKK	8	1	12	90	104	15	1720.74	3h
sp|P06493|CDK1_HUMAN	R.LESEEEGVPSTAIR.E	LESEEEGVPSTAIR	2	0.9999	4	37	50	14	1515.74	3h
sp|P06493|CDK1_HUMAN	K.NLDENGLDLLSK.M	NLDENGLDLLSK	1	1	1	255	266	12	1329.68	3h
sp|P06493|CDK1_HUMAN	R.YSTPVDIWSIGTIFAELATK.K	YSTPVDIWSIGTIFAELATK	1	1	1	181	200	20	2211.14	3h
sp|P06576|ATPB_HUMAN	K.KGSITSVQAIYVPADDLTDPAPATTFAHLDATTVLSR.A	KGSITSVQAIYVPADDLTDPAPATTFAHLDATTVLSR	1	0.9984	7	351	387	37	3841.97	3h
sp|P06576|ATPB_HUMAN	K.IPVGPETLGR.I	IPVGPETLGR	1	0.9993	8	134	143	10	1037.59	3h
sp|P06576|ATPB_HUMAN	K.AHGGYSVFAGVGER.T	AHGGYSVFAGVGER	1	1	1	226	239	14	1405.67	3h
sp|P06576|ATPB_HUMAN	R.AIAELGIYPAVDPLDSTSR.I	AIAELGIYPAVDPLDSTSR	1	1	15	388	406	19	1987.03	3h
sp|P06576|ATPB_HUMAN	R.DQEGQDVLLFIDNIFR.F	DQEGQDVLLFIDNIFR	1	1	10	295	310	16	1920.96	3h
sp|P06576|ATPB_HUMAN	R.EGNDLYHEMIESGVINLK.D	EGNDLYHEMIESGVINLK	1	1	13	242	259	18	2059.99	3h
sp|P06576|ATPB_HUMAN	R.FLSQPFQVAEVFTGHMGK.L	FLSQPFQVAEVFTGHMGK	1	1	7	463	480	18	2022	3h
sp|P06576|ATPB_HUMAN	K.GFQQILAGEYDHLPEQAFYMVGPIEEAVAK.A	GFQQILAGEYDHLPEQAFYMVGPIEEAVAK	1	1	15	490	519	30	3349.63	3h
sp|P06576|ATPB_HUMAN	X.GSITSVQAIYVPADDLTDPAPATTFAHLDATTVLSR.X	GSITSVQAIYVPADDLTDPAPATTFAHLDATTVLSR	1	1	5	352	387	36	3713.88	3h
sp|P06576|ATPB_HUMAN	K.IGLFGGAGVGK.T	IGLFGGAGVGK	1	1	5	202	212	11	974.55	3h
sp|P06576|ATPB_HUMAN	R.IMDPNIVGSEHYDVAR.G	IMDPNIVGSEHYDVAR	1	1	10	407	422	16	1814.86	3h
sp|P06576|ATPB_HUMAN	R.IMNVIGEPIDER.G	IMNVIGEPIDER	1	1	4	144	155	12	1384.7	3h
sp|P06576|ATPB_HUMAN	R.IPSAVGYQPTLATDMGTMQER.I	IPSAVGYQPTLATDMGTMQER	1	1	13	325	345	21	2265.08	3h
sp|P06576|ATPB_HUMAN	R.LVLEVAQHLGESTVR.T	LVLEVAQHLGESTVR	1	1	10	95	109	15	1649.91	3h
sp|P06576|ATPB_HUMAN	K.QFAPIHAEAPEFMEMSVEQEILVTGIK.V	QFAPIHAEAPEFMEMSVEQEILVTGIK	1	1	11	162	188	27	3043.5	3h
sp|P06576|ATPB_HUMAN	K.SLQDIIAILGMDELSEEDK.L	SLQDIIAILGMDELSEEDK	1	1	7	433	451	19	2118.04	3h
sp|P06576|ATPB_HUMAN	K.SLQDIIAILGMDELSEEDKLTVSR.A	SLQDIIAILGMDELSEEDKLTVSR	1	1	14	433	456	24	2674.37	3h
sp|P06576|ATPB_HUMAN	R.TIAMDGTEGLVR.G	TIAMDGTEGLVR	1	1	10	110	121	12	1261.63	3h
sp|P06576|ATPB_HUMAN	K.TVLIMELINNVAK.A	TVLIMELINNVAK	1	1	13	213	225	13	1456.83	3h
sp|P06576|ATPB_HUMAN	R.VALTGLTVAEYFR.D	VALTGLTVAEYFR	1	1	14	282	294	13	1438.78	3h
sp|P06576|ATPB_HUMAN	K.VALVYGQMNEPPGAR.A	VALVYGQMNEPPGAR	1	1	12	265	279	15	1600.8	3h
sp|P06576|ATPB_HUMAN	K.VLDSGAPIK.I	VLDSGAPIK	1	1	12	125	133	9	898.51	3h
sp|P06576|ATPB_HUMAN	K.VVDLLAPYAK.G	VVDLLAPYAK	1	1	6	189	198	10	1087.62	3h
sp|P06702|S10A9_HUMAN	X.NIETIINTFHQYSVK.X	NIETIINTFHQYSVK	1	0.9947	8	11	25	15	1805.93	3h
sp|P06703|S10A6_HUMAN	-.MACPLDQAIGLLVAIFHK.Y	MACPLDQAIGLLVAIFHK	1	1	13	1	18	18	1939.04	3h
sp|P06730|IF4E_HUMAN	X.DGIEPMWEDEK.X	DGIEPMWEDEK	4	0.9991	4	96	106	11	1347.56	3h
sp|P06730|IF4E_HUMAN	K.IVIGYQSHADTATK.S	IVIGYQSHADTATK	4	1	1	193	206	14	1502.77	3h
sp|P06733|ENOA_HUMAN	K.LNVTEQEK.I	LNVTEQEK	1	0.9656	1	82	89	8	959.492	3h
sp|P06733|ENOA_HUMAN	R.IEEELGSK.A	IEEELGSK	1	0.9974	31	413	420	8	903.454	3h
sp|P06733|ENOA_HUMAN	R.HIADLAGNSEVILPVPAFNVINGGSHAGNK.L	HIADLAGNSEVILPVPAFNVINGGSHAGNK	1	0.9992	53	133	162	30	3010.56	3h
sp|P06733|ENOA_HUMAN	R.AAVPSGASTGIYEALELR.D	AAVPSGASTGIYEALELR	9	1	66	33	50	18	1803.93	3h
sp|P06733|ENOA_HUMAN	K.DATNVGDEGGFAPNILENK.E	DATNVGDEGGFAPNILENK	1	1	30	203	221	19	1959.91	3h
sp|P06733|ENOA_HUMAN	K.DATNVGDEGGFAPNILENKEGLELLK.T	DATNVGDEGGFAPNILENKEGLELLK	1	1	5	203	228	26	2742.37	3h
sp|P06733|ENOA_HUMAN	K.DYPVVSIEDPFDQDDWGAWQK.F	DYPVVSIEDPFDQDDWGAWQK	1	1	28	286	306	21	2509.11	3h
sp|P06733|ENOA_HUMAN	K.FTASAGIQVVGDDLTVTNPK.R	FTASAGIQVVGDDLTVTNPK	1	1	77	307	326	20	2032.05	3h
sp|P06733|ENOA_HUMAN	R.GNPTVEVDLFTSK.G	GNPTVEVDLFTSK	1	1	17	16	28	13	1405.71	3h
sp|P06733|ENOA_HUMAN	K.IDKLMIEMDGTENK.S	IDKLMIEMDGTENK	1	1	3	90	103	14	1635.78	3h
sp|P06733|ENOA_HUMAN	R.IGAEVYHNLK.N	IGAEVYHNLK	1	1	16	184	193	10	1142.61	3h
sp|P06733|ENOA_HUMAN	K.KLNVTEQEK.I	KLNVTEQEK	1	1	2	81	89	9	1087.59	3h
sp|P06733|ENOA_HUMAN	K.KLNVTEQEKIDK.L	KLNVTEQEKIDK	1	1	9	81	92	12	1443.79	3h
sp|P06733|ENOA_HUMAN	K.LAMQEFMILPVGAANFR.E	LAMQEFMILPVGAANFR	1	1	44	163	179	17	1906.98	3h
sp|P06733|ENOA_HUMAN	K.LAQANGWGVMVSHR.S	LAQANGWGVMVSHR	1	1	50	359	372	14	1524.76	3h
sp|P06733|ENOA_HUMAN	K.LMIEMDGTENK.S	LMIEMDGTENK	1	1	28	93	103	11	1279.58	3h
sp|P06733|ENOA_HUMAN	K.LNVTEQEKIDK.L	LNVTEQEKIDK	1	1	3	82	92	11	1315.7	3h
sp|P06733|ENOA_HUMAN	K.SFIKDYPVVSIEDPFDQDDWGAWQK.F	SFIKDYPVVSIEDPFDQDDWGAWQK	1	1	7	282	306	25	2984.38	3h
sp|P06733|ENOA_HUMAN	R.SGETEDTFIADLVVGLCTGQIK.T	SGETEDTFIADLVVGLCTGQIK	6	1	22	373	394	22	2295.13	3h
sp|P06733|ENOA_HUMAN	R.SGKYDLDFK.S	SGKYDLDFK	1	1	13	254	262	9	1071.52	3h
sp|P06733|ENOA_HUMAN	K.TIAPALVSK.K	TIAPALVSK	1	1	6	72	80	9	898.547	3h
sp|P06733|ENOA_HUMAN	K.VVIGMDVAASEFFR.S	VVIGMDVAASEFFR	1	1	602	240	253	14	1539.77	3h
sp|P06733|ENOA_HUMAN	R.YISPDQLADLYK.S	YISPDQLADLYK	1	1	16	270	281	12	1424.72	3h
sp|P06737|PYGL_HUMAN	K.EYYEALPELK.L	EYYEALPELK	2	0.9028	1	731	740	10	1253.62	3h
sp|P06737|PYGL_HUMAN	X.SRPEFMLPVHFYGK.X	SRPEFMLPVHFYGK	3	0.9711	2	193	206	14	1706.86	3h
sp|P06737|PYGL_HUMAN	R.HLHFTLVK.D	HLHFTLVK	7	0.9746	1	35	42	8	993.574	3h
sp|P06737|PYGL_HUMAN	K.LHSFLGDDVFLR.E	LHSFLGDDVFLR	2	0.9988	1	522	533	12	1417.73	3h
sp|P06737|PYGL_HUMAN	R.VLYPNDNFFEGK.E	VLYPNDNFFEGK	6	0.999	3	279	290	12	1441.68	3h
sp|P06737|PYGL_HUMAN	K.DIINMLFYHDR.F	DIINMLFYHDR	2	0.9996	4	761	771	11	1435.69	3h
sp|P06737|PYGL_HUMAN	R.DFNVGDYIQAVLDR.N	DFNVGDYIQAVLDR	3	1	5	257	270	14	1623.79	3h
sp|P06737|PYGL_HUMAN	X.GAGTVFDAFPDQVAIQLNDTHPALAIPELMR.X	GAGTVFDAFPDQVAIQLNDTHPALAIPELMR	2	1	1	322	352	31	3306.67	3h
sp|P06737|PYGL_HUMAN	K.LITSVADVVNNDPMVGSK.L	LITSVADVVNNDPMVGSK	2	1	6	623	640	18	1857.95	3h
sp|P06744|G6PI_HUMAN	R.VDHQTGPIVWGEPGTNGQHAFYQLIHQGTK.M	VDHQTGPIVWGEPGTNGQHAFYQLIHQGTK	3	0.956	5	371	400	30	3314.62	3h
sp|P06744|G6PI_HUMAN	X.SNTPILVDGK.X	SNTPILVDGK	3	0.971	2	107	116	10	1042.56	3h
sp|P06744|G6PI_HUMAN	R.FNHFSLTLNTNHGHILVDYSK.N	FNHFSLTLNTNHGHILVDYSK	3	0.9757	4	37	57	21	2456.22	3h
sp|P06744|G6PI_HUMAN	X.SNTPILVDGKDVMPEVNK.X	SNTPILVDGKDVMPEVNK	3	0.9898	1	107	124	18	1955	3h
sp|P06744|G6PI_HUMAN	X.NLVTEDVMR.X	NLVTEDVMR	4	0.9906	2	58	66	9	1075.53	3h
sp|P06744|G6PI_HUMAN	K.EWFLQAAK.D	EWFLQAAK	3	0.9989	3	227	234	8	991.511	3h
sp|P06744|G6PI_HUMAN	R.AVLHVALR.N	AVLHVALR	3	1	9	97	104	8	877.548	3h
sp|P06744|G6PI_HUMAN	K.EFGIDPQNMFEFWDWVGGR.Y	EFGIDPQNMFEFWDWVGGR	3	1	5	255	273	19	2329.02	3h
sp|P06744|G6PI_HUMAN	R.FAAYFQQGDMESNGK.Y	FAAYFQQGDMESNGK	3	1	15	348	362	15	1691.72	3h
sp|P06744|G6PI_HUMAN	K.HFVALSTNTTK.V	HFVALSTNTTK	3	1	7	242	252	11	1217.64	3h
sp|P06744|G6PI_HUMAN	X.IEPELDGSAQVTSHDASTNGLINFIK.X	IEPELDGSAQVTSHDASTNGLINFIK	3	1	2	525	550	26	2755.36	3h
sp|P06744|G6PI_HUMAN	K.ILLANFLAQTEALMR.G	ILLANFLAQTEALMR	3	1	40	424	438	15	1702.94	3h
sp|P06744|G6PI_HUMAN	K.KIEPELDGSAQVTSHDASTNGLINFIK.Q	KIEPELDGSAQVTSHDASTNGLINFIK	3	1	19	524	550	27	2883.46	3h
sp|P06744|G6PI_HUMAN	X.LTPFMLGALVAMYEHK.X	LTPFMLGALVAMYEHK	3	1	3	482	497	16	1819.93	3h
sp|P06744|G6PI_HUMAN	K.TFTTQETITNAETAK.E	TFTTQETITNAETAK	3	1	15	212	226	15	1654.81	3h
sp|P06744|G6PI_HUMAN	X.TITDVINIGIGGSDLGPLMVTEALKPYSSGGPR.X	TITDVINIGIGGSDLGPLMVTEALKPYSSGGPR	2	1	5	148	180	33	3327.73	3h
sp|P06744|G6PI_HUMAN	K.TLAQLNPESSLFIIASK.T	TLAQLNPESSLFIIASK	3	1	14	195	211	17	1831.01	3h
sp|P06744|G6PI_HUMAN	K.VFEGNRPTNSIVFTK.L	VFEGNRPTNSIVFTK	3	1	14	467	481	15	1707.89	3h
sp|P06744|G6PI_HUMAN	R.VWYVSNIDGTHIAK.T	VWYVSNIDGTHIAK	3	1	10	181	194	14	1601.82	3h
sp|P06748|NPM_HUMAN	K.DELHIVEAEAMNYEGSPIK.V	DELHIVEAEAMNYEGSPIK	2	1	39	55	73	19	2144.01	3h
sp|P06748|NPM_HUMAN	K.GPSSVEDIK.A	GPSSVEDIK	2	1	22	240	248	9	930.464	3h
sp|P06748|NPM_HUMAN	K.LAADEDDDDDDEEDDDEDDDDDDFDDEEAEEK.A	LAADEDDDDDDEEDDDEDDDDDDFDDEEAEEK	2	1	4	158	189	32	3722.2	3h
sp|P06748|NPM_HUMAN	K.LAADEDDDDDDEEDDDEDDDDDDFDDEEAEEKAPVK.K	LAADEDDDDDDEEDDDEDDDDDDFDDEEAEEKAPVK	2	1	5	158	193	36	4117.45	3h
sp|P06748|NPM_HUMAN	K.LAADEDDDDDDEEDDDEDDDDDDFDDEEAEEKAPVKK.S	LAADEDDDDDDEEDDDEDDDDDDFDDEEAEEKAPVKK	2	1	5	158	194	37	4245.54	3h
sp|P06748|NPM_HUMAN	K.MSVQPTVSLGGFEITPPVVLR.L	MSVQPTVSLGGFEITPPVVLR	3	1	38	81	101	21	2226.21	3h
sp|P06748|NPM_HUMAN	R.MTDQEAIQDLWQWR.K	MTDQEAIQDLWQWR	1	1	40	278	291	14	1818.84	3h
sp|P06748|NPM_HUMAN	R.TVSLGAGAKDELHIVEAEAMNYEGSPIK.V	TVSLGAGAKDELHIVEAEAMNYEGSPIK	2	1	20	46	73	28	2928.45	3h
sp|P06748|NPM_HUMAN	K.VDNDENEHQLSLR.T	VDNDENEHQLSLR	3	1	25	33	45	13	1567.72	3h
sp|P06865|HEXA_HUMAN	R.GLETFSQLVWK.S	GLETFSQLVWK	2	0.9886	1	138	148	11	1306.69	3h
sp|P06865|HEXA_HUMAN	K.LNVFHWHLVDDPSFPYESFTFPELMR.K	LNVFHWHLVDDPSFPYESFTFPELMR	4	0.9973	2	198	223	26	3222.53	3h
sp|P06865|HEXA_HUMAN	R.HYLPLSSILDTLDVMAYNK.L	HYLPLSSILDTLDVMAYNK	2	1	12	179	197	19	2192.12	3h
sp|P07108|ACBP_HUMAN	X.WDAWNELK.X	WDAWNELK	2	0.9992	7	56	63	8	1060.5	3h
sp|P07108|ACBP_HUMAN	K.AKWDAWNELK.G	AKWDAWNELK	2	1	5	54	63	10	1259.63	3h
sp|P07108|ACBP_HUMAN	K.QATVGDINTERPGMLDFTGK.A	QATVGDINTERPGMLDFTGK	2	1	33	34	53	20	2149.05	3h
sp|P07108|ACBP_HUMAN	K.TKPSDEEMLFIYGHYK.Q	TKPSDEEMLFIYGHYK	2	1	4	18	33	16	1956.93	3h
sp|P07195|LDHB_HUMAN	R.IHPVSTMVK.G	IHPVSTMVK	2	0.9974	11	271	279	9	1010.56	3h
sp|P07195|LDHB_HUMAN	K.LKGEMMDLQHGSLFLQTPK.I	LKGEMMDLQHGSLFLQTPK	4	0.9984	14	59	77	19	2172.1	3h
sp|P07195|LDHB_HUMAN	K.FIIPQIVK.Y	FIIPQIVK	4	0.9991	8	120	127	8	956.604	3h
sp|P07195|LDHB_HUMAN	K.LKDDEVAQLKK.S	LKDDEVAQLKK	2	0.9995	7	309	319	11	1285.72	3h
sp|P07195|LDHB_HUMAN	K.IVVVTAGVR.Q	IVVVTAGVR	4	0.9998	7	92	100	9	912.573	3h
sp|P07195|LDHB_HUMAN	K.GEMMDLQHGSLFLQTPK.I	GEMMDLQHGSLFLQTPK	4	1	15	61	77	17	1930.93	3h
sp|P07195|LDHB_HUMAN	R.GLTSVINQK.L	GLTSVINQK	2	1	14	300	308	9	958.543	3h
sp|P07195|LDHB_HUMAN	K.GYTNWAIGLSVADLIESMLK.N	GYTNWAIGLSVADLIESMLK	2	1	30	247	266	20	2180.11	3h
sp|P07195|LDHB_HUMAN	K.IVADKDYSVTANSK.I	IVADKDYSVTANSK	4	1	17	78	91	14	1509.76	3h
sp|P07195|LDHB_HUMAN	K.LIAPVAEEEATVPNNK.I	LIAPVAEEEATVPNNK	4	1	16	8	23	16	1693.89	3h
sp|P07195|LDHB_HUMAN	K.LKDDEVAQLK.K	LKDDEVAQLK	2	1	8	309	318	10	1157.63	3h
sp|P07195|LDHB_HUMAN	K.MVVESAYEVIK.L	MVVESAYEVIK	2	1	9	234	244	11	1266.65	3h
sp|P07195|LDHB_HUMAN	K.SADTLWDIQK.D	SADTLWDIQK	2	1	8	320	329	10	1175.58	3h
sp|P07195|LDHB_HUMAN	K.SLADELALVDVLEDK.L	SLADELALVDVLEDK	4	1	27	44	58	15	1628.85	3h
sp|P07195|LDHB_HUMAN	K.SLADELALVDVLEDKLK.G	SLADELALVDVLEDKLK	4	1	11	44	60	17	1870.03	3h
sp|P07237|PDIA1_HUMAN	K.FFPASADR.T	FFPASADR	2	0.9021	2	445	452	8	909.433	3h
sp|P07237|PDIA1_HUMAN	K.ALAPEYAK.A	ALAPEYAK	3	0.9194	1	58	65	8	861.458	3h
sp|P07237|PDIA1_HUMAN	X.LKAEGSEIR.X	LKAEGSEIR	3	0.9312	1	70	78	9	1001.55	3h
sp|P07237|PDIA1_HUMAN	K.SVSDYDGK.L	SVSDYDGK	2	0.9505	1	264	271	8	869.374	3h
sp|P07237|PDIA1_HUMAN	R.NNFEGEVTKENLLDFIK.H	NNFEGEVTKENLLDFIK	2	0.9991	3	214	230	17	2009.01	3h
sp|P07237|PDIA1_HUMAN	R.EADDIVNWLK.K	EADDIVNWLK	1	1	15	121	130	10	1201.6	3h
sp|P07237|PDIA1_HUMAN	K.ENLLDFIK.H	ENLLDFIK	2	1	23	223	230	8	990.537	3h
sp|P07237|PDIA1_HUMAN	K.FLESGGQDGAGDDDDLEDLEEAEEPDMEEDDDQK.A	FLESGGQDGAGDDDDLEDLEEAEEPDMEEDDDQK	2	1	22	469	502	34	3756.44	3h
sp|P07237|PDIA1_HUMAN	K.HNQLPLVIEFTEQTAPK.I	HNQLPLVIEFTEQTAPK	2	1	24	231	247	17	1964.04	3h
sp|P07237|PDIA1_HUMAN	X.IKPHLMSQELPEDWDK.X	IKPHLMSQELPEDWDK	2	1	12	351	366	16	1964.96	3h
sp|P07237|PDIA1_HUMAN	K.IKPHLMSQELPEDWDKQPVK.V	IKPHLMSQELPEDWDKQPVK	2	1	30	351	370	20	2417.24	3h
sp|P07237|PDIA1_HUMAN	R.ILEFFGLK.K	ILEFFGLK	2	1	38	301	308	8	965.556	3h
sp|P07237|PDIA1_HUMAN	K.ILFIFIDSDHTDNQR.I	ILFIFIDSDHTDNQR	2	1	50	286	300	15	1832.9	3h
sp|P07237|PDIA1_HUMAN	R.KSNFAEALAAHK.Y	KSNFAEALAAHK	3	1	16	31	42	12	1285.67	3h
sp|P07237|PDIA1_HUMAN	K.LGETYKDHENIVIAK.M	LGETYKDHENIVIAK	2	1	22	410	424	15	1728.9	3h
sp|P07237|PDIA1_HUMAN	R.LITLEEEMTK.Y	LITLEEEMTK	2	1	21	317	326	10	1205.62	3h
sp|P07237|PDIA1_HUMAN	K.MDSTANEVEAVK.V	MDSTANEVEAVK	2	1	18	425	436	12	1292.59	3h
sp|P07237|PDIA1_HUMAN	X.NFEDVAFDEKK.X	NFEDVAFDEKK	2	1	12	376	386	11	1340.62	3h
sp|P07237|PDIA1_HUMAN	K.QFLQAAEAIDDIPFGITSNSDVFSK.Y	QFLQAAEAIDDIPFGITSNSDVFSK	2	1	58	171	195	25	2712.33	3h
sp|P07237|PDIA1_HUMAN	K.QLAPIWDK.L	QLAPIWDK	2	1	5	402	409	8	969.527	3h
sp|P07237|PDIA1_HUMAN	K.RTGPAATTLPDGAAAESLVESSEVAVIGFFK.D	RTGPAATTLPDGAAAESLVESSEVAVIGFFK	1	1	14	132	162	31	3090.58	3h
sp|P07237|PDIA1_HUMAN	K.SNFAEALAAHK.Y	SNFAEALAAHK	3	1	16	32	42	11	1157.58	3h
sp|P07237|PDIA1_HUMAN	R.TGPAATTLPDGAAAESLVESSEVAVIGFFK.D	TGPAATTLPDGAAAESLVESSEVAVIGFFK	1	1	142	133	162	30	2934.48	3h
sp|P07237|PDIA1_HUMAN	K.THILLFLPK.S	THILLFLPK	2	1	31	255	263	9	1080.67	3h
sp|P07237|PDIA1_HUMAN	R.TVIDYNGER.T	TVIDYNGER	2	1	7	453	461	9	1065.51	3h
sp|P07237|PDIA1_HUMAN	K.VDATEESDLAQQYGVR.G	VDATEESDLAQQYGVR	3	1	15	82	97	16	1779.83	3h
sp|P07237|PDIA1_HUMAN	K.VHSFPTLK.F	VHSFPTLK	2	1	10	437	444	8	927.516	3h
sp|P07237|PDIA1_HUMAN	K.YKPESEELTAER.I	YKPESEELTAER	2	1	18	327	338	12	1450.69	3h
sp|P07237|PDIA1_HUMAN	K.YQLDKDGVVLFK.K	YQLDKDGVVLFK	2	1	9	196	207	12	1423.77	3h
sp|P07339|CATD_HUMAN	K.VSTLPAITLK.L	VSTLPAITLK	1	0.9981	1	332	341	10	1041.64	3h
sp|P07339|CATD_HUMAN	R.ISVNNVLPVFDNLMQQK.L	ISVNNVLPVFDNLMQQK	3	0.9996	1	206	222	17	1958.03	3h
sp|P07339|CATD_HUMAN	R.DPDAQPGGELMLGGTDSK.Y	DPDAQPGGELMLGGTDSK	2	1	8	236	253	18	1786.8	3h
sp|P07339|CATD_HUMAN	K.LVDQNIFSFYLSR.D	LVDQNIFSFYLSR	2	1	14	223	235	13	1600.82	3h
sp|P07359|GP1BA_HUMAN	R.VGPLVAGR.R	VGPLVAGR	3	0.9693	1	593	600	8	767.463	3h
sp|P07384|CAN1_HUMAN	K.YLGQDYEQLR.V	YLGQDYEQLR	11	0.979	1	37	46	10	1283.61	3h
sp|P07384|CAN1_HUMAN	R.NYPATFWVNPQFK.I	NYPATFWVNPQFK	2	1	7	386	398	13	1610.79	3h
sp|P07437|TBB5_HUMAN	K.NMMAACDPR.H	NMMAACDPR	19	0.9933	1	298	306	9	1007.4	3h
sp|P07437|TBB5_HUMAN	R.AILVDLEPGTMDSVR.S	AILVDLEPGTMDSVR	7	1	20	63	77	15	1614.83	3h
sp|P07437|TBB5_HUMAN	R.ALTVPELTQQVFDAK.N	ALTVPELTQQVFDAK	6	1	26	283	297	15	1658.89	3h
sp|P07437|TBB5_HUMAN	X.EIVHIQAGQCGNQIGAK.X	EIVHIQAGQCGNQIGAK	8	1	5	3	19	17	1764.89	3h
sp|P07437|TBB5_HUMAN	K.EVDEQMLNVQNK.N	EVDEQMLNVQNK	9	1	8	325	336	12	1445.68	3h
sp|P07437|TBB5_HUMAN	R.FPGQLNADLR.K	FPGQLNADLR	21	1	36	242	251	10	1129.59	3h
sp|P07437|TBB5_HUMAN	R.FPGQLNADLRK.L	FPGQLNADLRK	21	1	4	242	252	11	1257.68	3h
sp|P07437|TBB5_HUMAN	X.FWEVISDEHGIDPTGTYHGDSDLQLDR.X	FWEVISDEHGIDPTGTYHGDSDLQLDR	5	1	15	20	46	27	3101.4	3h
sp|P07437|TBB5_HUMAN	K.GHYTEGAELVDSVLDVVR.K	GHYTEGAELVDSVLDVVR	9	1	36	104	121	18	1957.97	3h
sp|P07437|TBB5_HUMAN	K.GHYTEGAELVDSVLDVVRK.E	GHYTEGAELVDSVLDVVRK	9	1	2	104	122	19	2086.07	3h
sp|P07437|TBB5_HUMAN	R.IMNTFSVVPSPK.V	IMNTFSVVPSPK	7	1	16	163	174	12	1318.69	3h
sp|P07437|TBB5_HUMAN	R.ISVYYNEATGGK.Y	ISVYYNEATGGK	5	1	17	47	58	12	1300.63	3h
sp|P07437|TBB5_HUMAN	K.LAVNMVPFPR.L	LAVNMVPFPR	22	1	4	253	262	10	1142.62	3h
sp|P07437|TBB5_HUMAN	K.MAVTFIGNSTAIQELFK.R	MAVTFIGNSTAIQELFK	7	1	33	363	379	17	1868.97	3h
sp|P07437|TBB5_HUMAN	R.YLTVAAVFR.G	YLTVAAVFR	10	1	11	310	318	9	1038.58	3h
sp|P07602|SAP_HUMAN	K.QEILAALEK.G	QEILAALEK	7	0.999	10	430	438	9	1013.58	3h
sp|P07602|SAP_HUMAN	K.DVVTAAGDMLK.D	DVVTAAGDMLK	7	0.9991	2	68	78	11	1118.56	3h
sp|P07602|SAP_HUMAN	K.EILDAFDK.M	EILDAFDK	6	0.9991	4	337	344	8	949.474	3h
sp|P07602|SAP_HUMAN	K.EIVDSYLPVILDIIK.G	EIVDSYLPVILDIIK	6	1	21	108	122	15	1728.99	3h
sp|P07602|SAP_HUMAN	K.NYISQYSEIAIQMMMHMQPK.E	NYISQYSEIAIQMMMHMQPK	3	1	15	243	262	20	2442.12	3h
sp|P07737|PROF1_HUMAN	R.DSLLQDGEFSMDLR.T	DSLLQDGEFSMDLR	2	1	32	76	89	14	1624.74	3h
sp|P07737|PROF1_HUMAN	K.DSPSVWAAVPGK.T	DSPSVWAAVPGK	2	1	6	27	38	12	1212.61	3h
sp|P07737|PROF1_HUMAN	R.SSFYVNGLTLGGQK.C	SSFYVNGLTLGGQK	2	1	6	57	70	14	1469.75	3h
sp|P07737|PROF1_HUMAN	K.STGGAPTFNVTVTK.T	STGGAPTFNVTVTK	2	1	6	92	105	14	1378.71	3h
sp|P07737|PROF1_HUMAN	K.TFVNITPAEVGVLVGK.D	TFVNITPAEVGVLVGK	2	1	23	39	54	16	1642.93	3h
sp|P07737|PROF1_HUMAN	K.TLVLLMGK.E	TLVLLMGK	2	1	11	109	116	8	873.533	3h
sp|P07741|APT_HUMAN	R.IDYIAGLDSR.G	IDYIAGLDSR	1	1	3	58	67	10	1121.57	3h
sp|P07814|SYEP_HUMAN	X.SLYDEVAAQGEVVR.X	SLYDEVAAQGEVVR	2	0.9037	1	825	838	14	1534.76	3h
sp|P07814|SYEP_HUMAN	R.VATTAGLYGSNLMEHTEIDHWLEFSATK.L	VATTAGLYGSNLMEHTEIDHWLEFSATK	2	0.9506	1	61	88	28	3120.48	3h
sp|P07814|SYEP_HUMAN	R.NSEPAGLETPEAK.V	NSEPAGLETPEAK	2	0.9935	4	890	902	13	1341.64	3h
sp|P07814|SYEP_HUMAN	X.AIQGGTSHHLGQNFSK.X	AIQGGTSHHLGQNFSK	1	0.9984	5	1235	1250	16	1680.83	3h
sp|P07814|SYEP_HUMAN	K.EYIPGQPPLSQSSDSSPTR.N	EYIPGQPPLSQSSDSSPTR	2	0.999	1	871	889	19	2044.97	3h
sp|P07814|SYEP_HUMAN	K.VIDPVAPR.Y	VIDPVAPR	2	0.999	2	499	506	8	865.501	3h
sp|P07814|SYEP_HUMAN	K.GNAAWQEQLK.Q	GNAAWQEQLK	2	0.9991	3	130	139	10	1143.57	3h
sp|P07814|SYEP_HUMAN	R.VAVQGDVVR.E	VAVQGDVVR	2	0.9991	2	757	765	9	941.527	3h
sp|P07814|SYEP_HUMAN	K.FVELPGAEMGK.V	FVELPGAEMGK	2	0.9992	7	187	197	11	1176.58	3h
sp|P07814|SYEP_HUMAN	K.AYVDDTPAEQMK.A	AYVDDTPAEQMK	2	1	10	289	300	12	1366.61	3h
sp|P07814|SYEP_HUMAN	R.DEQFYWIIEALGIR.K	DEQFYWIIEALGIR	2	1	3	403	416	14	1751.89	3h
sp|P07814|SYEP_HUMAN	R.DQDLEPGAPSMGAK.S	DQDLEPGAPSMGAK	1	1	6	1464	1477	14	1414.64	3h
sp|P07814|SYEP_HUMAN	K.EVIPVNVPEAQEEMK.E	EVIPVNVPEAQEEMK	2	1	15	514	528	15	1710.85	3h
sp|P07814|SYEP_HUMAN	K.FAGGDYTTTIEAFISASGR.A	FAGGDYTTTIEAFISASGR	1	1	9	1216	1234	19	1962.93	3h
sp|P07814|SYEP_HUMAN	K.KEENLADWYSQVITK.S	KEENLADWYSQVITK	1	1	7	1020	1034	15	1822.91	3h
sp|P07814|SYEP_HUMAN	K.LQAILEDIQVTLFTR.A	LQAILEDIQVTLFTR	1	1	2	1401	1415	15	1758.99	3h
sp|P07814|SYEP_HUMAN	K.LTVAENEAETK.L	LTVAENEAETK	1	1	9	1390	1400	11	1203.6	3h
sp|P07814|SYEP_HUMAN	K.MFEIVFEDPK.I	MFEIVFEDPK	1	1	3	1251	1260	10	1253.6	3h
sp|P07814|SYEP_HUMAN	K.NPEVGLKPVWYSPK.V	NPEVGLKPVWYSPK	2	1	6	536	549	14	1612.86	3h
sp|P07814|SYEP_HUMAN	K.NQGGGLSSSGAGEGQGPK.K	NQGGGLSSSGAGEGQGPK	1	1	5	992	1009	18	1586.72	3h
sp|P07814|SYEP_HUMAN	K.TGQEYKPGNPPAEIGQNISSNSSASILESK.S	TGQEYKPGNPPAEIGQNISSNSSASILESK	2	1	1	795	824	30	3102.51	3h
sp|P07814|SYEP_HUMAN	K.THMVVANTMEDFQK.I	THMVVANTMEDFQK	1	1	1	1422	1435	14	1649.75	3h
sp|P07814|SYEP_HUMAN	K.THVADFAPEVAWVTR.S	THVADFAPEVAWVTR	1	1	2	1092	1106	15	1697.85	3h
sp|P07900|HS90A_HUMAN	X.HNDDEQYAWESSAGGSFTVR.X	HNDDEQYAWESSAGGSFTVR	4	0.9492	1	154	173	20	2254.95	3h
sp|P07900|HS90A_HUMAN	R.TDTGEPMGR.G	TDTGEPMGR	1	0.976	1	174	182	9	962.412	3h
sp|P07900|HS90A_HUMAN	X.KHSQFIGYPITLFVEK.X	KHSQFIGYPITLFVEK	2	0.99	1	209	224	16	1906.03	3h
sp|P07900|HS90A_HUMAN	K.ELHINLIPNK.Q	ELHINLIPNK	3	0.9966	4	75	84	10	1189.68	3h
sp|P07900|HS90A_HUMAN	K.YIDQEELNK.T	YIDQEELNK	4	0.9987	4	284	292	9	1150.55	3h
sp|P07900|HS90A_HUMAN	K.EGLELPEDEEEKKK.Q	EGLELPEDEEEKKK	4	0.9988	11	547	560	14	1671.82	3h
sp|P07900|HS90A_HUMAN	X.TLTIVDTGIGMTK.X	TLTIVDTGIGMTK	3	0.9997	11	88	100	13	1348.72	3h
sp|P07900|HS90A_HUMAN	R.YESLTDPSK.L	YESLTDPSK	7	0.9998	14	61	69	9	1038.49	3h
sp|P07900|HS90A_HUMAN	K.ADLINNLGTIAK.S	ADLINNLGTIAK	5	1	6	101	112	12	1241.7	3h
sp|P07900|HS90A_HUMAN	R.APFDLFENR.K	APFDLFENR	1	1	13	347	355	9	1107.53	3h
sp|P07900|HS90A_HUMAN	K.DLVILLYETALLSSGFSLEDPQTHANR.I	DLVILLYETALLSSGFSLEDPQTHANR	1	1	5	661	687	27	3001.54	3h
sp|P07900|HS90A_HUMAN	K.DQVANSAFVER.L	DQVANSAFVER	1	1	6	500	510	11	1234.59	3h
sp|P07900|HS90A_HUMAN	K.EDQTEYLEER.R	EDQTEYLEER	5	1	16	192	201	10	1310.56	3h
sp|P07900|HS90A_HUMAN	K.EGLELPEDEEEK.K	EGLELPEDEEEK	5	1	9	547	558	12	1415.63	3h
sp|P07900|HS90A_HUMAN	K.EGLELPEDEEEKK.K	EGLELPEDEEEKK	5	1	13	547	559	13	1543.72	3h
sp|P07900|HS90A_HUMAN	K.EKYIDQEELNK.T	EKYIDQEELNK	4	1	10	282	292	11	1407.69	3h
sp|P07900|HS90A_HUMAN	K.ELHINLIPNKQDR.T	ELHINLIPNKQDR	2	1	7	75	87	13	1588.87	3h
sp|P07900|HS90A_HUMAN	R.ELISNSSDALDK.I	ELISNSSDALDK	3	1	8	47	58	12	1290.63	3h
sp|P07900|HS90A_HUMAN	R.ELISNSSDALDKIR.Y	ELISNSSDALDKIR	2	1	2	47	60	14	1559.81	3h
sp|P07900|HS90A_HUMAN	X.ESEDKPEIEDVGSDEEEEK.X	ESEDKPEIEDVGSDEEEEK	1	1	1	251	269	19	2191.91	3h
sp|P07900|HS90A_HUMAN	K.HFSVEGQLEFR.A	HFSVEGQLEFR	5	1	13	328	338	11	1347.66	3h
sp|P07900|HS90A_HUMAN	K.HIYYITGETK.D	HIYYITGETK	2	1	4	490	499	10	1223.62	3h
sp|P07900|HS90A_HUMAN	K.HLEINPDHSIIETLR.Q	HLEINPDHSIIETLR	1	1	14	633	647	15	1785.94	3h
sp|P07900|HS90A_HUMAN	K.HSQFIGYPITLFVEK.E	HSQFIGYPITLFVEK	2	1	14	210	224	15	1777.94	3h
sp|P07900|HS90A_HUMAN	K.KHLEINPDHSIIETLR.Q	KHLEINPDHSIIETLR	1	1	19	632	647	16	1914.03	3h
sp|P07900|HS90A_HUMAN	K.LGLGIDEDDPTADDTSAAVTEEMPPLEGDDDTSR.M	LGLGIDEDDPTADDTSAAVTEEMPPLEGDDDTSR	1	1	8	694	727	34	3546.53	3h
sp|P07900|HS90A_HUMAN	R.NPDDITNEEYGEFYK.S	NPDDITNEEYGEFYK	1	1	14	300	314	15	1832.77	3h
sp|P07900|HS90A_HUMAN	R.RAPFDLFENR.K	RAPFDLFENR	1	1	23	346	355	10	1263.63	3h
sp|P07900|HS90A_HUMAN	K.SLTNDWEDHLAVK.H	SLTNDWEDHLAVK	2	1	16	315	327	13	1526.73	3h
sp|P07900|HS90A_HUMAN	R.VFIMDNCEELIPEYLNFIR.G	VFIMDNCEELIPEYLNFIR	1	1	19	368	386	19	2357.14	3h
sp|P07900|HS90A_HUMAN	R.YESLTDPSKLDSGK.E	YESLTDPSKLDSGK	6	1	18	61	74	14	1538.74	3h
sp|P07900|HS90A_HUMAN	R.YYTSASGDEMVSLK.D	YYTSASGDEMVSLK	1	1	9	465	478	14	1549.69	3h
sp|P07910|HNRPC_HUMAN	K.LKGDDLQAIKK.E	LKGDDLQAIKK	1	0.9978	5	188	198	11	1227.71	3h
sp|P07910|HNRPC_HUMAN	R.VPPPPPIAR.A	VPPPPPIAR	1	0.9985	14	143	151	9	942.565	3h
sp|P07910|HNRPC_HUMAN	K.SDVEAIFSK.Y	SDVEAIFSK	4	0.999	1	31	39	9	994.495	3h
sp|P07910|HNRPC_HUMAN	K.KSDVEAIFSK.Y	KSDVEAIFSK	4	0.9991	3	30	39	10	1122.59	3h
sp|P07910|HNRPC_HUMAN	R.GDDQLELIKDDEK.E	GDDQLELIKDDEK	2	1	6	276	288	13	1516.72	3h
sp|P07910|HNRPC_HUMAN	K.GFAFVQYVNER.N	GFAFVQYVNER	2	1	1	51	61	11	1328.65	3h
sp|P07910|HNRPC_HUMAN	R.MIAGQVLDINLAAEPK.V	MIAGQVLDINLAAEPK	2	1	11	74	89	16	1681.9	3h
sp|P07910|HNRPC_HUMAN	K.QKVDSLLENLEK.I	QKVDSLLENLEK	2	1	13	205	216	12	1414.77	3h
sp|P07910|HNRPC_HUMAN	K.VDSLLENLEK.I	VDSLLENLEK	2	1	5	207	216	10	1158.61	3h
sp|P07910|HNRPC_HUMAN	R.VFIGNLNTLVVK.K	VFIGNLNTLVVK	4	1	14	18	29	12	1315.78	3h
sp|P07954|FUMH_HUMAN	R.IEYDTFGELK.V	IEYDTFGELK	2	0.9992	7	52	61	10	1213.59	3h
sp|P07954|FUMH_HUMAN	R.AAAEVNQDYGLDPK.I	AAAEVNQDYGLDPK	2	1	13	102	115	14	1489.7	3h
sp|P07954|FUMH_HUMAN	K.ETAIELGYLTAEQFDEWVKPK.D	ETAIELGYLTAEQFDEWVKPK	2	1	4	484	504	21	2466.23	3h
sp|P07954|FUMH_HUMAN	R.IYELAAGGTAVGTGLNTR.I	IYELAAGGTAVGTGLNTR	2	1	1	269	286	18	1762.92	3h
sp|P07954|FUMH_HUMAN	K.VAALTGLPFVTAPNK.F	VAALTGLPFVTAPNK	2	1	2	297	311	15	1497.85	3h
sp|P08107|HSP71_HUMAN	X.VEIIANDQGNR.X	VEIIANDQGNR	22	0.9893	15	26	36	11	1227.62	3h
sp|P08107|HSP71_HUMAN	K.LLQDFFNGR.D	LLQDFFNGR	4	0.999	3	349	357	9	1108.57	3h
sp|P08107|HSP71_HUMAN	R.IINEPTAAAIAYGLDR.T	IINEPTAAAIAYGLDR	6	1	10	172	187	16	1686.89	3h
sp|P08107|HSP71_HUMAN	K.NQVALNPQNTVFDAK.R	NQVALNPQNTVFDAK	3	1	9	57	71	15	1657.84	3h
sp|P08133|ANXA6_HUMAN	X.NKPLFFADK.X	NKPLFFADK	5	0.9755	1	599	607	9	1078.58	3h
sp|P08133|ANXA6_HUMAN	K.DAISGIGTDEK.C	DAISGIGTDEK	6	0.9909	2	103	113	11	1104.53	3h
sp|P08133|ANXA6_HUMAN	K.SEISGDLAR.L	SEISGDLAR	5	0.9933	1	419	427	9	946.471	3h
sp|P08133|ANXA6_HUMAN	R.ILISLATGHR.E	ILISLATGHR	5	0.9939	5	500	509	10	1079.64	3h
sp|P08133|ANXA6_HUMAN	X.ALIEILATR.X	ALIEILATR	5	0.9945	4	457	465	9	998.612	3h
sp|P08133|ANXA6_HUMAN	K.GFGSDKEAILDIITSR.S	GFGSDKEAILDIITSR	11	0.9969	1	35	50	16	1720.9	3h
sp|P08133|ANXA6_HUMAN	R.LILGLMMPPAHYDAK.Q	LILGLMMPPAHYDAK	5	0.9991	3	428	442	15	1668.87	3h
sp|P08133|ANXA6_HUMAN	R.SEIDLLNIR.R	SEIDLLNIR	6	0.9992	10	630	638	9	1071.59	3h
sp|P08133|ANXA6_HUMAN	X.SELDMLDIR.X	SELDMLDIR	3	0.9999	4	282	290	9	1090.53	3h
sp|P08133|ANXA6_HUMAN	R.DAFVAIVQSVK.N	DAFVAIVQSVK	5	1	7	588	598	11	1175.65	3h
sp|P08133|ANXA6_HUMAN	R.DLEADIIGDTSGHFQK.M	DLEADIIGDTSGHFQK	5	1	2	141	156	16	1744.83	3h
sp|P08133|ANXA6_HUMAN	K.EAILDIITSR.S	EAILDIITSR	11	1	5	41	50	10	1129.63	3h
sp|P08133|ANXA6_HUMAN	R.EDAQVAAEILEIADTPSGDK.T	EDAQVAAEILEIADTPSGDK	3	1	4	521	540	20	2070.99	3h
sp|P08133|ANXA6_HUMAN	X.EEDDVVSEDLVQQDVQDLYEAGELK.X	EEDDVVSEDLVQQDVQDLYEAGELK	3	1	3	167	191	25	2864.31	3h
sp|P08133|ANXA6_HUMAN	X.GLGTDEDTIIDIITHR.X	GLGTDEDTIIDIITHR	4	1	15	378	393	16	1767.9	3h
sp|P08133|ANXA6_HUMAN	R.GSIHDFPGFDPNQDAEALYTAMK.G	GSIHDFPGFDPNQDAEALYTAMK	8	1	13	12	34	23	2523.14	3h
sp|P08133|ANXA6_HUMAN	K.MLVVLLQGTR.E	MLVVLLQGTR	4	1	7	157	166	10	1128.67	3h
sp|P08133|ANXA6_HUMAN	K.SLEDALSSDTSGHFR.R	SLEDALSSDTSGHFR	5	1	6	484	498	15	1620.74	3h
sp|P08133|ANXA6_HUMAN	K.SLHQAIEGDTSGDFLK.A	SLHQAIEGDTSGDFLK	6	1	2	648	663	16	1716.83	3h
sp|P08195|4F2_HUMAN	X.WWHTGALYR.X	WWHTGALYR	1	0.9747	3	218	226	9	1188.58	3h
sp|P08195|4F2_HUMAN	R.LDYLSSLK.V	LDYLSSLK	1	0.9802	1	248	255	8	937.51	3h
sp|P08195|4F2_HUMAN	K.GLVLGPIHK.N	GLVLGPIHK	1	0.9967	6	258	266	9	932.578	3h
sp|P08195|4F2_HUMAN	R.VILDLTPNYR.G	VILDLTPNYR	1	0.9999	1	304	313	10	1202.66	3h
sp|P08195|4F2_HUMAN	K.GQSEDPGSLLSLFR.R	GQSEDPGSLLSLFR	1	1	2	511	524	14	1504.75	3h
sp|P08195|4F2_HUMAN	R.LLTSFLPAQLLR.L	LLTSFLPAQLLR	1	1	6	440	451	12	1370.83	3h
sp|P08195|4F2_HUMAN	K.VAEDEAEAAAAAK.F	VAEDEAEAAAAAK	2	1	10	148	160	13	1244.59	3h
sp|P08236|BGLR_HUMAN	K.ELDGLWSFR.A	ELDGLWSFR	3	0.9991	1	40	48	9	1121.55	3h
sp|P08237|K6PF_HUMAN	X.VTVLGHVQR.X	VTVLGHVQR	2	0.9976	2	293	301	9	1007.59	3h
sp|P08238|HS90B_HUMAN	R.RAPFDLFENKK.K	RAPFDLFENKK	2	0.9655	5	338	348	11	1363.72	3h
sp|P08238|HS90B_HUMAN	R.RVFIMDSCDELIPEYLNFIR.G	RVFIMDSCDELIPEYLNFIR	1	0.9709	1	359	378	20	2472.22	3h
sp|P08238|HS90B_HUMAN	K.AKFENLCK.L	AKFENLCK	2	0.986	2	558	565	8	951.482	3h
sp|P08238|HS90B_HUMAN	K.SIYYITGESK.E	SIYYITGESK	4	0.9988	1	482	491	10	1159.57	3h
sp|P08238|HS90B_HUMAN	R.RAPFDLFENK.K	RAPFDLFENK	2	0.9991	15	338	347	10	1235.63	3h
sp|P08238|HS90B_HUMAN	R.ADHGEPIGR.G	ADHGEPIGR	2	1	9	169	177	9	950.456	3h
sp|P08238|HS90B_HUMAN	K.DLVVLLFETALLSSGFSLEDPQTHSNR.I	DLVVLLFETALLSSGFSLEDPQTHSNR	1	1	17	653	679	27	2987.52	3h
sp|P08238|HS90B_HUMAN	R.DNSTMGYMMAK.K	DNSTMGYMMAK	2	1	11	613	623	11	1247.49	3h
sp|P08238|HS90B_HUMAN	R.ELISNASDALDK.I	ELISNASDALDK	3	1	4	42	53	12	1274.63	3h
sp|P08238|HS90B_HUMAN	K.EQVANSAFVER.V	EQVANSAFVER	3	1	2	492	502	11	1248.61	3h
sp|P08238|HS90B_HUMAN	R.GFEVVYMTEPIDEYCVQQLK.E	GFEVVYMTEPIDEYCVQQLK	1	1	1	507	526	20	2390.11	3h
sp|P08238|HS90B_HUMAN	K.HLEINPDHPIVETLR.Q	HLEINPDHPIVETLR	1	1	13	625	639	15	1781.94	3h
sp|P08238|HS90B_HUMAN	X.HSQFIGYPITLYLEK.X	HSQFIGYPITLYLEK	2	1	25	205	219	15	1807.95	3h
sp|P08238|HS90B_HUMAN	K.IDIIPNPQER.T	IDIIPNPQER	2	1	9	73	82	10	1193.64	3h
sp|P08238|HS90B_HUMAN	K.IEDVGSDEEDDSGK.D	IEDVGSDEEDDSGK	2	1	2	250	263	14	1493.6	3h
sp|P08238|HS90B_HUMAN	X.IEDVGSDEEDDSGKDK.X	IEDVGSDEEDDSGKDK	2	1	2	250	265	16	1736.72	3h
sp|P08238|HS90B_HUMAN	K.KHLEINPDHPIVETLR.Q	KHLEINPDHPIVETLR	1	1	11	624	639	16	1910.04	3h
sp|P08238|HS90B_HUMAN	K.LGIHEDSTNR.R	LGIHEDSTNR	4	1	5	439	448	10	1140.55	3h
sp|P08238|HS90B_HUMAN	K.LGLGIDEDEVAAEEPNAAVPDEIPPLEGDEDASR.M	LGLGIDEDEVAAEEPNAAVPDEIPPLEGDEDASR	1	1	13	686	719	34	3531.64	3h
sp|P08238|HS90B_HUMAN	R.NPDDITQEEYGEFYK.S	NPDDITQEEYGEFYK	1	1	5	292	306	15	1846.79	3h
sp|P08238|HS90B_HUMAN	R.VFIMDSCDELIPEYLNFIR.G	VFIMDSCDELIPEYLNFIR	1	1	12	360	378	19	2316.11	3h
sp|P08238|HS90B_HUMAN	R.YHTSQSGDEMTSLSEYVSR.M	YHTSQSGDEMTSLSEYVSR	4	1	29	457	475	19	2175.94	3h
sp|P08240|SRPR_HUMAN	R.EDMESVLDK.M	EDMESVLDK	2	0.9889	2	336	344	9	1064.47	3h
sp|P08240|SRPR_HUMAN	R.NQGFDVVLVDTAGR.M	NQGFDVVLVDTAGR	2	0.9997	3	511	524	14	1489.75	3h
sp|P08240|SRPR_HUMAN	K.GTLGGMFGMLK.G	GTLGGMFGMLK	2	1	2	315	325	11	1110.55	3h
sp|P08240|SRPR_HUMAN	K.LITVNTPDLVLFVGEALVGNEAVDQLVK.F	LITVNTPDLVLFVGEALVGNEAVDQLVK	2	1	11	538	565	28	2965.63	3h
sp|P08240|SRPR_HUMAN	K.NVAADIAVQLCESVANKLEGK.V	NVAADIAVQLCESVANKLEGK	2	1	1	353	373	21	2171.12	3h
sp|P08243|ASNS_HUMAN	R.ELYLFDVLR.A	ELYLFDVLR	3	1	5	396	404	9	1166.63	3h
sp|P08311|CATG_HUMAN	R.NVNPVALPR.A	NVNPVALPR	1	0.9037	1	123	131	9	978.56	3h
sp|P08311|CATG_HUMAN	R.TIQNDIMLLQLSR.R	TIQNDIMLLQLSR	1	1	2	104	116	13	1543.84	3h
sp|P08311|CATG_HUMAN	R.VSSFLPWIR.T	VSSFLPWIR	1	1	14	231	239	9	1103.61	3h
sp|P08397|HEM3_HUMAN	X.GPQLAAQNLGISLANLLLSK.X	GPQLAAQNLGISLANLLLSK	1	1	5	326	345	20	2020.17	3h
sp|P08559|ODPA_HUMAN	R.MVNSNLASVEELK.E	MVNSNLASVEELK	3	0.9984	2	324	336	13	1432.72	3h
sp|P08567|PLEK_HUMAN	X.PMWVVLLEDGIEFYK.X	PMWVVLLEDGIEFYK	2	0.9998	1	23	37	15	1837.93	3h
sp|P08567|PLEK_HUMAN	X.EDPAYLHYYDPAGAEDPLGAIHLR.X	EDPAYLHYYDPAGAEDPLGAIHLR	1	1	3	270	293	24	2682.27	3h
sp|P08567|PLEK_HUMAN	R.KSEEENLFEIITADEVHYFLQAATPK.E	KSEEENLFEIITADEVHYFLQAATPK	1	1	6	308	333	26	3021.5	3h
sp|P08567|PLEK_HUMAN	X.SEEENLFEIITADEVHYFLQAATPK.X	SEEENLFEIITADEVHYFLQAATPK	1	1	4	309	333	25	2893.4	3h
sp|P08574|CY1_HUMAN	K.MLMMMALLVPLVYTIK.R	MLMMMALLVPLVYTIK	1	1	16	292	307	16	1866.02	3h
sp|P08579|RU2B_HUMAN	R.GQAFVIFK.E	GQAFVIFK	2	1	14	50	57	8	908.509	3h
sp|P08579|RU2B_HUMAN	R.SLYALFSQFGHVVDIVALK.T	SLYALFSQFGHVVDIVALK	1	1	7	26	44	19	2106.15	3h
sp|P08621|RU17_HUMAN	R.DPIPYLPPLEK.L	DPIPYLPPLEK	1	0.9942	7	17	27	11	1280.7	3h
sp|P08621|RU17_HUMAN	X.GYAFIEYEHER.X	GYAFIEYEHER	1	1	1	145	155	11	1412.63	3h
sp|P08621|RU17_HUMAN	K.MWDPHNDPNAQGDAFK.T	MWDPHNDPNAQGDAFK	1	1	9	88	103	16	1841.78	3h
sp|P08670|VIME_HUMAN	X.LQEEMLQR.X	LQEEMLQR	4	0.9789	1	189	196	8	1045.52	3h
sp|P08670|VIME_HUMAN	K.NLQEAEEWYK.S	NLQEAEEWYK	6	0.9963	11	283	292	10	1308.6	3h
sp|P08670|VIME_HUMAN	R.DGQVINETSQHHDDLE.-	DGQVINETSQHHDDLE	1	1	4	451	466	16	1835.79	3h
sp|P08670|VIME_HUMAN	R.EEAENTLQSFR.Q	EEAENTLQSFR	4	1	10	197	207	11	1322.61	3h
sp|P08670|VIME_HUMAN	R.ISLPLPNFSSLNLR.E	ISLPLPNFSSLNLR	2	1	9	411	424	14	1569.89	3h
sp|P08670|VIME_HUMAN	R.KVESLQEEIAFLK.K	KVESLQEEIAFLK	4	1	14	223	235	13	1532.84	3h
sp|P08670|VIME_HUMAN	R.LQDEIQNMKEEMAR.H	LQDEIQNMKEEMAR	3	1	1	365	378	14	1733.81	3h
sp|P08708|RS17_HUMAN	R.LGNDFHTNKR.V	LGNDFHTNKR	1	0.9986	1	24	33	10	1200.6	3h
sp|P08708|RS17_HUMAN	X.IAGYVTHLMK.X	IAGYVTHLMK	1	0.9992	3	50	59	10	1131.61	3h
sp|P08708|RS17_HUMAN	R.DNYVPEVSALDQEIIEVDPDTK.E	DNYVPEVSALDQEIIEVDPDTK	1	1	10	82	103	22	2488.18	3h
sp|P08708|RS17_HUMAN	K.LLDFGSLSNLQVTQPTVGMNFK.T	LLDFGSLSNLQVTQPTVGMNFK	1	1	16	108	129	22	2408.24	3h
sp|P08754|GNAI3_HUMAN	R.ISQSNYIPTQQDVLR.T	ISQSNYIPTQQDVLR	2	1	1	162	176	15	1760.91	3h
sp|P08758|ANXA5_HUMAN	X.FITIFGTR.X	FITIFGTR	4	0.996	5	194	201	8	953.532	3h
sp|P08758|ANXA5_HUMAN	R.GTVTDFPGFDER.A	GTVTDFPGFDER	5	0.9992	1	7	18	12	1339.6	3h
sp|P08758|ANXA5_HUMAN	R.SEIDLFNIR.K	SEIDLFNIR	3	0.9998	1	277	285	9	1105.58	3h
sp|P08758|ANXA5_HUMAN	R.DLLDDLKSELTGK.F	DLLDDLKSELTGK	3	1	17	64	76	13	1445.76	3h
sp|P08758|ANXA5_HUMAN	R.DPDAGIDEAQVEQDAQALFQAGELK.W	DPDAGIDEAQVEQDAQALFQAGELK	4	1	9	162	186	25	2657.24	3h
sp|P08758|ANXA5_HUMAN	R.ETSGNLEQLLLAVVK.S	ETSGNLEQLLLAVVK	4	1	16	228	242	15	1612.9	3h
sp|P08758|ANXA5_HUMAN	K.GLGTDEESILTLLTSR.S	GLGTDEESILTLLTSR	3	1	20	30	45	16	1703.89	3h
sp|P08758|ANXA5_HUMAN	K.NFATSLYSMIK.G	NFATSLYSMIK	3	1	10	291	301	11	1273.63	3h
sp|P08758|ANXA5_HUMAN	R.SIPAYLAETLYYAMK.G	SIPAYLAETLYYAMK	3	1	12	246	260	15	1732.87	3h
sp|P08758|ANXA5_HUMAN	K.VLTEIIASR.T	VLTEIIASR	4	1	5	109	117	9	1000.59	3h
sp|P08779|K1C16_HUMAN	K.IIAATIENAQPILQIDNAR.L	IIAATIENAQPILQIDNAR	4	1	1	178	196	19	2063.14	3h
sp|P08865|RSSA_HUMAN	R.YVDIAIPCNNK.G	YVDIAIPCNNK	3	0.9765	2	156	166	11	1248.62	3h
sp|P08865|RSSA_HUMAN	R.LLVVTDPR.A	LLVVTDPR	3	0.9971	2	121	128	8	911.543	3h
sp|P08865|RSSA_HUMAN	X.GAHSVGLMWWMLAR.X	GAHSVGLMWWMLAR	3	0.9998	15	167	180	14	1613.79	3h
sp|P08865|RSSA_HUMAN	K.SDGIYIINLK.R	SDGIYIINLK	4	0.9998	7	43	52	10	1134.63	3h
sp|P08865|RSSA_HUMAN	R.AIVAIENPADVSVISSR.N	AIVAIENPADVSVISSR	3	1	11	64	80	17	1739.94	3h
sp|P08865|RSSA_HUMAN	R.DPEEIEKEEQAAAEK.A	DPEEIEKEEQAAAEK	3	1	17	206	220	15	1714.79	3h
sp|P08865|RSSA_HUMAN	R.EHPWEVMPDLYFYR.D	EHPWEVMPDLYFYR	3	1	12	192	205	14	1880.85	3h
sp|P08865|RSSA_HUMAN	K.FAAATGATPIAGR.F	FAAATGATPIAGR	3	1	9	90	102	13	1202.64	3h
sp|P08865|RSSA_HUMAN	K.FLAAGTHLGGTNLDFQMEQYIYK.R	FLAAGTHLGGTNLDFQMEQYIYK	2	1	4	18	40	23	2616.26	3h
sp|P08865|RSSA_HUMAN	R.FTPGTFTNQIQAAFR.E	FTPGTFTNQIQAAFR	2	1	18	103	117	15	1697.85	3h
sp|P08865|RSSA_HUMAN	R.KSDGIYIINLK.R	KSDGIYIINLK	4	1	8	42	52	11	1262.72	3h
sp|P08962|CD63_HUMAN	K.VMSEFNNNFR.Q	VMSEFNNNFR	2	0.9839	1	111	120	10	1256.56	3h
sp|P09012|SNRPA_HUMAN	X.PNHTIYINNLNEK.X	PNHTIYINNLNEK	1	0.987	2	8	20	13	1568.79	3h
sp|P09012|SNRPA_HUMAN	K.EVSSATNALR.S	EVSSATNALR	1	0.9953	1	61	70	10	1046.54	3h
sp|P09012|SNRPA_HUMAN	X.SMQGFPFYDKPMR.X	SMQGFPFYDKPMR	1	0.9992	2	71	83	13	1602.73	3h
sp|P09110|THIK_HUMAN	X.DTTPDELLSAVMTAVLK.X	DTTPDELLSAVMTAVLK	5	1	3	58	74	17	1802.93	3h
sp|P09211|GSTP1_HUMAN	X.PPYTVVYFPVR.X	PPYTVVYFPVR	2	0.9999	14	2	12	11	1336.72	3h
sp|P09211|GSTP1_HUMAN	K.AFLASPEYVNLPINGNGK.Q	AFLASPEYVNLPINGNGK	2	1	8	192	209	18	1902.98	3h
sp|P09211|GSTP1_HUMAN	K.ALPGQLKPFETLLSQNQGGK.T	ALPGQLKPFETLLSQNQGGK	1	1	22	122	141	20	2125.15	3h
sp|P09211|GSTP1_HUMAN	K.DQQEAALVDMVNDGVEDLR.C	DQQEAALVDMVNDGVEDLR	2	1	25	83	101	19	2115.97	3h
sp|P09211|GSTP1_HUMAN	K.EEVVTVETWQEGSLK.A	EEVVTVETWQEGSLK	2	1	1	31	45	15	1732.85	3h
sp|P09211|GSTP1_HUMAN	K.FQDGDLTLYQSNTILR.H	FQDGDLTLYQSNTILR	2	1	15	56	71	16	1882.94	3h
sp|P09211|GSTP1_HUMAN	R.MLLADQGQSWKEEVVTVETWQEGSLK.A	MLLADQGQSWKEEVVTVETWQEGSLK	2	1	4	20	45	26	2990.47	3h
sp|P09211|GSTP1_HUMAN	K.YISLIYTNYEAGK.D	YISLIYTNYEAGK	1	1	8	104	116	13	1533.77	3h
sp|P09211|GSTP1_HUMAN	K.YISLIYTNYEAGKDDYVK.A	YISLIYTNYEAGKDDYVK	1	1	13	104	121	18	2154.05	3h
sp|P09234|RU1C_HUMAN	X.WMEEQAQSLIDK.X	WMEEQAQSLIDK	3	1	7	41	52	12	1476.69	3h
sp|P09382|LEG1_HUMAN	K.LPDGYEFK.F	LPDGYEFK	1	0.9752	1	101	108	8	967.463	3h
sp|P09382|LEG1_HUMAN	K.SFVLNLGK.D	SFVLNLGK	1	0.9992	2	30	37	8	876.504	3h
sp|P09382|LEG1_HUMAN	R.LNLEAINYMAADGDFK.I	LNLEAINYMAADGDFK	1	1	5	113	128	16	1783.84	3h
sp|P09417|DHPR_HUMAN	X.NRPSSGSLIQVVTTEGR.X	NRPSSGSLIQVVTTEGR	2	0.9998	1	220	236	17	1799.95	3h
sp|P09429|HMGB1_HUMAN	K.GKFEDMAK.A	GKFEDMAK	7	0.9992	12	58	65	8	924.434	3h
sp|P09429|HMGB1_HUMAN	K.KKHPDASVNFSEFSK.K	KKHPDASVNFSEFSK	5	0.9992	4	29	43	15	1719.85	3h
sp|P09429|HMGB1_HUMAN	K.HPDASVNFSEFSK.K	HPDASVNFSEFSK	5	1	3	31	43	13	1463.67	3h
sp|P09429|HMGB1_HUMAN	K.KHPDASVNFSEFSK.K	KHPDASVNFSEFSK	5	1	9	30	43	14	1591.76	3h
sp|P09429|HMGB1_HUMAN	K.KLGEMWNNTAADDK.Q	KLGEMWNNTAADDK	5	1	5	128	141	14	1591.73	3h
sp|P09429|HMGB1_HUMAN	K.KLGEMWNNTAADDKQPYEK.K	KLGEMWNNTAADDKQPYEK	4	1	27	128	146	19	2237.04	3h
sp|P09429|HMGB1_HUMAN	K.LGEMWNNTAADDK.Q	LGEMWNNTAADDK	5	1	2	129	141	13	1463.63	3h
sp|P09429|HMGB1_HUMAN	K.LGEMWNNTAADDKQPYEK.K	LGEMWNNTAADDKQPYEK	4	1	15	129	146	18	2108.95	3h
sp|P09429|HMGB1_HUMAN	K.MSSYAFFVQTCR.E	MSSYAFFVQTCR	8	1	1	13	24	12	1438.63	3h
sp|P09429|HMGB1_HUMAN	K.RPPSAFFLFCSEYRPK.I	RPPSAFFLFCSEYRPK	4	1	9	97	112	16	1943.97	3h
sp|P09467|F16P1_HUMAN	R.APVILGSPDDVLEFLK.V	APVILGSPDDVLEFLK	1	1	5	315	330	16	1711.94	3h
sp|P09493|TPM1_HUMAN	X.MEIQEIQLK.X	MEIQEIQLK	9	0.9748	7	141	149	9	1130.6	3h
sp|P09622|DLDH_HUMAN	K.ADGGTQVIDTK.N	ADGGTQVIDTK	2	0.9722	1	167	177	11	1103.54	3h
sp|P09622|DLDH_HUMAN	K.ALTGGIAHLFK.Q	ALTGGIAHLFK	3	0.9898	3	133	143	11	1126.65	3h
sp|P09622|DLDH_HUMAN	K.IPNIYAIGDVVAGPMLAHK.A	IPNIYAIGDVVAGPMLAHK	3	1	12	347	365	19	1978.07	3h
sp|P09622|DLDH_HUMAN	K.NLGLEELGIELDPR.G	NLGLEELGIELDPR	3	1	5	321	334	14	1566.83	3h
sp|P09622|DLDH_HUMAN	K.SEEQLKEEGIEYK.V	SEEQLKEEGIEYK	3	1	11	405	417	13	1580.76	3h
sp|P09651|ROA1_HUMAN	X.KIFVGGIK.X	KIFVGGIK	8	0.9013	1	106	113	8	860.544	3h
sp|P09651|ROA1_HUMAN	R.DYFEQYGK.I	DYFEQYGK	2	0.9886	8	123	130	8	1048.45	3h
sp|P09651|ROA1_HUMAN	R.GFGFVTYATVEEVDAAMNARPHK.V	GFGFVTYATVEEVDAAMNARPHK	1	0.9983	3	56	78	23	2509.2	3h
sp|P09651|ROA1_HUMAN	X.SHFEQWGTLTDCVVMR.X	SHFEQWGTLTDCVVMR	2	0.9991	2	32	47	16	1907.86	3h
sp|P09651|ROA1_HUMAN	K.SESPKEPEQLR.K	SESPKEPEQLR	1	0.9992	20	4	14	11	1298.65	3h
sp|P09651|ROA1_HUMAN	R.GFAFVTFDDHDSVDK.I	GFAFVTFDDHDSVDK	2	1	22	147	161	15	1698.75	3h
sp|P09651|ROA1_HUMAN	X.GFGFVTYATVEEVDAAMNAR.X	GFGFVTYATVEEVDAAMNAR	1	1	47	56	75	20	2147	3h
sp|P09651|ROA1_HUMAN	K.IEVIEIMTDR.G	IEVIEIMTDR	2	1	15	131	140	10	1217.63	3h
sp|P09651|ROA1_HUMAN	X.IFVGGIKEDTEEHHLR.X	IFVGGIKEDTEEHHLR	2	1	21	107	122	16	1878.96	3h
sp|P09651|ROA1_HUMAN	R.KLFIGGLSFETTDESLR.S	KLFIGGLSFETTDESLR	2	1	10	15	31	17	1911.99	3h
sp|P09651|ROA1_HUMAN	K.LFIGGLSFETTDESLR.S	LFIGGLSFETTDESLR	2	1	31	16	31	16	1783.9	3h
sp|P09651|ROA1_HUMAN	R.NQGGYGGSSSSSSYGSGR.R	NQGGYGGSSSSSSYGSGR	1	1	15	353	370	18	1693.69	3h
sp|P09651|ROA1_HUMAN	R.SSGPYGGGGQYFAKPR.N	SSGPYGGGGQYFAKPR	1	1	16	337	352	16	1627.77	3h
sp|P09661|RU2A_HUMAN	K.GGPSPGDVEAIK.N	GGPSPGDVEAIK	1	0.9007	1	194	205	12	1125.56	3h
sp|P09661|RU2A_HUMAN	K.TFNPGAGLPTDK.K	TFNPGAGLPTDK	1	0.9893	1	180	191	12	1216.61	3h
sp|P09661|RU2A_HUMAN	K.GLLQSGQIPGR.E	GLLQSGQIPGR	1	0.9988	8	222	232	11	1124.63	3h
sp|P09661|RU2A_HUMAN	K.LTAELIEQAAQYTNAVR.D	LTAELIEQAAQYTNAVR	2	1	12	4	20	17	1889.98	3h
sp|P09661|RU2A_HUMAN	K.NAIANASTLAEVER.L	NAIANASTLAEVER	1	1	2	206	219	14	1457.75	3h
sp|P09661|RU2A_HUMAN	K.SLTYLSILR.N	SLTYLSILR	2	1	3	114	122	9	1064.62	3h
sp|P09874|PARP1_HUMAN	R.FYTLIPHDFGMK.K	FYTLIPHDFGMK	1	0.9037	1	736	747	12	1467.72	3h
sp|P09874|PARP1_HUMAN	K.MIFDVESMKK.A	MIFDVESMKK	1	0.9754	2	675	684	10	1226.6	3h
sp|P09874|PARP1_HUMAN	K.MVDPEKPQLGMIDR.W	MVDPEKPQLGMIDR	1	0.9887	1	143	156	14	1627.8	3h
sp|P09874|PARP1_HUMAN	K.AEPVEVVAPR.G	AEPVEVVAPR	1	0.9888	1	487	496	10	1065.58	3h
sp|P09874|PARP1_HUMAN	K.LQLLEDDKENR.Y	LQLLEDDKENR	1	0.9933	2	572	582	11	1371.7	3h
sp|P09874|PARP1_HUMAN	R.QIQAAYSILSEVQQAVSQGSSDSQILDLSNR.F	QIQAAYSILSEVQQAVSQGSSDSQILDLSNR	1	0.9983	3	705	735	31	3334.66	3h
sp|P09874|PARP1_HUMAN	K.LEQMPSKEDAIEHFMK.L	LEQMPSKEDAIEHFMK	1	0.9989	4	601	616	16	1931.91	3h
sp|P09874|PARP1_HUMAN	X.HPDVEVDGFSELR.X	HPDVEVDGFSELR	3	0.9996	2	66	78	13	1498.7	3h
sp|P09874|PARP1_HUMAN	K.QQVPSGESAILDR.V	QQVPSGESAILDR	1	0.9999	6	270	282	13	1398.71	3h
sp|P09874|PARP1_HUMAN	K.EDAIEHFMK.L	EDAIEHFMK	1	1	1	608	616	9	1118.51	3h
sp|P09874|PARP1_HUMAN	K.GGAAVDPDSGLEHSAHVLEK.G	GGAAVDPDSGLEHSAHVLEK	1	1	4	529	548	20	1987.96	3h
sp|P09874|PARP1_HUMAN	R.GGSDDSSKDPIDVNYEK.L	GGSDDSSKDPIDVNYEK	1	1	8	780	796	17	1824.8	3h
sp|P09874|PARP1_HUMAN	R.KGDEVDGVDEVAK.K	KGDEVDGVDEVAK	1	1	4	209	221	13	1359.65	3h
sp|P09874|PARP1_HUMAN	K.KPPLLNNADSVQAK.V	KPPLLNNADSVQAK	1	1	14	748	761	14	1493.82	3h
sp|P09874|PARP1_HUMAN	R.MAIMVQSPMFDGK.V	MAIMVQSPMFDGK	3	1	6	35	47	13	1453.67	3h
sp|P09874|PARP1_HUMAN	K.SLQELFLAHILSPWGAEVK.A	SLQELFLAHILSPWGAEVK	1	1	15	468	486	19	2137.16	3h
sp|P09874|PARP1_HUMAN	K.TLGDFAAEYAK.S	TLGDFAAEYAK	1	1	6	109	119	11	1184.57	3h
sp|P09874|PARP1_HUMAN	R.TTNFAGILSQGLR.I	TTNFAGILSQGLR	1	1	2	866	878	13	1376.74	3h
sp|P09874|PARP1_HUMAN	K.VEMLDNLLDIEVAYSLLR.G	VEMLDNLLDIEVAYSLLR	1	1	8	762	779	18	2105.11	3h
sp|P09874|PARP1_HUMAN	R.VVSEDFLQDVSASTK.S	VVSEDFLQDVSASTK	1	1	9	453	467	15	1623.8	3h
sp|P09960|LKHA4_HUMAN	K.DLSSHQLNEFLAQTLQR.A	DLSSHQLNEFLAQTLQR	2	1	1	494	510	17	1999.01	3h
sp|P09972|ALDOC_HUMAN	K.GVVPLAGTDGETTTQGLDGLSER.C	GVVPLAGTDGETTTQGLDGLSER	3	1	6	112	134	23	2272.12	3h
sp|P09972|ALDOC_HUMAN	K.VDKGVVPLAGTDGETTTQGLDGLSER.C	VDKGVVPLAGTDGETTTQGLDGLSER	3	1	1	109	134	26	2614.31	3h
sp|P0C0S5|H2AZ_HUMAN	X.GDEELDSLIK.X	GDEELDSLIK	7	1	6	93	102	10	1117.55	3h
sp|P0C0S8|H2A1_HUMAN	X.NDEELNKLLGK.X	NDEELNKLLGK	10	1	3	90	100	11	1271.67	3h
sp|P0C7P4|UCRIL_HUMAN	X.GVAGALRPLVQATVPATPEQPVLDLK.X	GVAGALRPLVQATVPATPEQPVLDLK	2	1	2	30	55	26	2639.5	3h
sp|P0C7P4|UCRIL_HUMAN	K.VPDFSEYR.R	VPDFSEYR	2	1	8	94	101	8	1011.47	3h
sp|P0C7T7|CN082_HUMAN	R.GAATWGQEK.A	GAATWGQEK	1	0.947	1	217	225	9	946.449	3h
sp|P0CG47|UBB_HUMAN	X.ESTLHLVLR.X	ESTLHLVLR	19	1	33	64	72	9	1066.61	3h
sp|P0CG47|UBB_HUMAN	X.IQDKEGIPPDQQR.X	IQDKEGIPPDQQR	18	1	22	30	42	13	1522.77	3h
sp|P10124|SRGN_HUMAN	K.GPMFELLPGESNK.I	GPMFELLPGESNK	1	1	7	54	66	13	1417.69	3h
sp|P10153|RNAS2_HUMAN	R.RDPPQYPVVPVHLDR.I	RDPPQYPVVPVHLDR	1	1	7	145	159	15	1786.95	3h
sp|P10155|RO60_HUMAN	X.ALLQEMPLTALLR.X	ALLQEMPLTALLR	4	1	13	271	283	13	1467.85	3h
sp|P10155|RO60_HUMAN	R.IPTHLFTFIQFK.K	IPTHLFTFIQFK	4	1	5	121	132	12	1490.83	3h
sp|P10155|RO60_HUMAN	K.LGLENAEALIR.L	LGLENAEALIR	4	1	4	53	63	11	1197.67	3h
sp|P10415|BCL2_HUMAN	X.EMSPLVDNIALWMTEYLNR.X	EMSPLVDNIALWMTEYLNR	2	0.9999	5	165	183	19	2294.11	3h
sp|P10415|BCL2_HUMAN	R.FATVVEELFR.D	FATVVEELFR	2	0.9999	1	130	139	10	1209.64	3h
sp|P10415|BCL2_HUMAN	X.PLFDFSWLSLK.X	PLFDFSWLSLK	1	1	5	208	218	11	1351.71	3h
sp|P10415|BCL2_HUMAN	X.TSPLQTPAAPGAAAGPALSPVPPVVHLTLR.X	TSPLQTPAAPGAAAGPALSPVPPVVHLTLR	2	1	4	69	98	30	2885.61	3h
sp|P10515|ODP2_HUMAN	K.ILVPEGTR.D	ILVPEGTR	2	0.9742	2	275	282	8	883.512	3h
sp|P10515|ODP2_HUMAN	K.ISVNDFIIK.A	ISVNDFIIK	4	0.9998	3	474	482	9	1047.59	3h
sp|P10515|ODP2_HUMAN	K.GVETIANDVVSLATK.A	GVETIANDVVSLATK	4	1	14	533	547	15	1515.81	3h
sp|P10515|ODP2_HUMAN	K.VPEANSSWMDTVIR.Q	VPEANSSWMDTVIR	4	1	1	491	504	14	1603.77	3h
sp|P10599|THIO_HUMAN	X.MIKPFFHSLSEK.X	MIKPFFHSLSEK	1	0.9655	5	37	48	12	1462.76	3h
sp|P10599|THIO_HUMAN	K.VGEFSGANK.E	VGEFSGANK	2	0.9809	1	86	94	9	907.437	3h
sp|P10599|THIO_HUMAN	K.EKLEATINELV.-	EKLEATINELV	2	0.999	4	95	105	11	1257.68	3h
sp|P10599|THIO_HUMAN	K.TAFQEALDAAGDK.L	TAFQEALDAAGDK	2	1	4	9	21	13	1335.63	3h
sp|P10606|COX5B_HUMAN	R.EDPNLVPSISNK.R	EDPNLVPSISNK	2	0.9999	2	75	86	12	1311.67	3h
sp|P10606|COX5B_HUMAN	K.KGLDPYNVLAPK.G	KGLDPYNVLAPK	2	1	9	57	68	12	1313.73	3h
sp|P10644|KAP0_HUMAN	K.VSILESLDKWER.L	VSILESLDKWER	2	0.9991	6	253	264	12	1473.78	3h
sp|P10644|KAP0_HUMAN	K.HNIQALLK.D	HNIQALLK	2	1	2	25	32	8	935.554	3h
sp|P10644|KAP0_HUMAN	X.LTVADALEPVQFEDGQK.X	LTVADALEPVQFEDGQK	2	1	6	265	281	17	1858.93	3h
sp|P10768|ESTD_HUMAN	X.FAVYLPPK.X	FAVYLPPK	1	0.9882	1	32	39	8	933.53	3h
sp|P10768|ESTD_HUMAN	K.AYDATHLVK.S	AYDATHLVK	1	0.9998	7	201	209	9	1016.53	3h
sp|P10768|ESTD_HUMAN	R.LQEGYDHSYYFIATFITDHIR.H	LQEGYDHSYYFIATFITDHIR	1	1	6	254	274	21	2588.23	3h
sp|P10768|ESTD_HUMAN	R.MYSYVTEELPQLINANFPVDPQR.M	MYSYVTEELPQLINANFPVDPQR	1	1	20	120	142	23	2723.33	3h
sp|P10768|ESTD_HUMAN	K.SYPGSQLDILIDQGK.D	SYPGSQLDILIDQGK	1	1	5	210	224	15	1632.83	3h
sp|P10809|CH60_HUMAN	K.GANPVEIR.R	GANPVEIR	3	0.9868	1	134	141	8	854.46	3h
sp|P10809|CH60_HUMAN	K.IPAMTIAK.N	IPAMTIAK	1	0.997	5	474	481	8	843.487	3h
sp|P10809|CH60_HUMAN	X.IGIEIIKR.X	IGIEIIKR	1	0.9993	9	463	470	8	940.605	3h
sp|P10809|CH60_HUMAN	K.VGEVIVTK.D	VGEVIVTK	1	0.9998	16	345	352	8	843.504	3h
sp|P10809|CH60_HUMAN	R.ALMLQGVDLLADAVAVTMGPK.G	ALMLQGVDLLADAVAVTMGPK	7	1	49	38	58	21	2112.13	3h
sp|P10809|CH60_HUMAN	K.DMAIATGGAVFGEEGLTLNLEDVQPHDLGK.V	DMAIATGGAVFGEEGLTLNLEDVQPHDLGK	1	1	20	315	344	30	3096.5	3h
sp|P10809|CH60_HUMAN	K.EEKDPGMGAMGGMGGGMGGGMF.-	EEKDPGMGAMGGMGGGMGGGMF	1	1	2	552	573	22	2059.78	3h
sp|P10809|CH60_HUMAN	K.EIGNIISDAMK.K	EIGNIISDAMK	3	1	5	181	191	11	1189.6	3h
sp|P10809|CH60_HUMAN	X.GVMLAVDAVIAELK.X	GVMLAVDAVIAELK	3	1	18	143	156	14	1427.8	3h
sp|P10809|CH60_HUMAN	R.GVMLAVDAVIAELKK.Q	GVMLAVDAVIAELKK	3	1	19	143	157	15	1555.9	3h
sp|P10809|CH60_HUMAN	R.GYISPYFINTSK.G	GYISPYFINTSK	2	1	6	222	233	12	1388.69	3h
sp|P10809|CH60_HUMAN	K.IMQSSSEVGYDAMAGDFVNMVEK.G	IMQSSSEVGYDAMAGDFVNMVEK	1	1	10	494	516	23	2507.1	3h
sp|P10809|CH60_HUMAN	R.IQEIIEQLDVTTSEYEK.E	IQEIIEQLDVTTSEYEK	1	1	15	371	387	17	2037.02	3h
sp|P10809|CH60_HUMAN	K.ISSIQSIVPALEIANAHR.K	ISSIQSIVPALEIANAHR	1	1	29	251	268	18	1918.06	3h
sp|P10809|CH60_HUMAN	K.KISSIQSIVPALEIANAHR.K	KISSIQSIVPALEIANAHR	1	1	4	250	268	19	2046.16	3h
sp|P10809|CH60_HUMAN	R.KPLVIIAEDVDGEALSTLVLNR.L	KPLVIIAEDVDGEALSTLVLNR	1	1	96	269	290	22	2364.32	3h
sp|P10809|CH60_HUMAN	K.LSDGVAVLK.V	LSDGVAVLK	1	1	12	397	405	9	900.525	3h
sp|P10809|CH60_HUMAN	K.LVQDVANNTNEEAGDGTTTATVLAR.S	LVQDVANNTNEEAGDGTTTATVLAR	4	1	11	97	121	25	2559.24	3h
sp|P10809|CH60_HUMAN	K.NAGVEGSLIVEK.I	NAGVEGSLIVEK	1	1	11	482	493	12	1214.65	3h
sp|P10809|CH60_HUMAN	X.PVTTPEEIAQVATISANGDKEIGNIISDAMK.X	PVTTPEEIAQVATISANGDKEIGNIISDAMK	3	1	1	161	191	31	3211.63	3h
sp|P10809|CH60_HUMAN	X.QSKPVTTPEEIAQVATISANGDK.X	QSKPVTTPEEIAQVATISANGDK	3	1	4	158	180	23	2383.22	3h
sp|P10809|CH60_HUMAN	K.QSKPVTTPEEIAQVATISANGDKEIGNIISDAMK.K	QSKPVTTPEEIAQVATISANGDKEIGNIISDAMK	3	1	24	158	191	34	3554.81	3h
sp|P10809|CH60_HUMAN	R.RGVMLAVDAVIAELK.K	RGVMLAVDAVIAELK	3	1	7	142	156	15	1583.9	3h
sp|P10809|CH60_HUMAN	R.RGVMLAVDAVIAELKK.Q	RGVMLAVDAVIAELKK	3	1	8	142	157	16	1712	3h
sp|P10809|CH60_HUMAN	R.TALLDAAGVASLLTTAEVVVTEIPK.E	TALLDAAGVASLLTTAEVVVTEIPK	1	1	29	527	551	25	2481.39	3h
sp|P10809|CH60_HUMAN	R.TALLDAAGVASLLTTAEVVVTEIPKEEK.D	TALLDAAGVASLLTTAEVVVTEIPKEEK	1	1	33	527	554	28	2867.57	3h
sp|P10809|CH60_HUMAN	R.TALLDAAGVASLLTTAEVVVTEIPKEEKDPGMGAMGGMGGGMGGGMF.-	TALLDAAGVASLLTTAEVVVTEIPKEEKDPGMGAMGGMGGGMGGGMF	1	1	14	527	573	47	4523.17	3h
sp|P10809|CH60_HUMAN	K.TLNDELEIIEGMK.F	TLNDELEIIEGMK	3	1	11	206	218	13	1503.75	3h
sp|P10809|CH60_HUMAN	R.TVIIEQSWGSPK.V	TVIIEQSWGSPK	6	1	10	61	72	12	1343.71	3h
sp|P10809|CH60_HUMAN	K.VGGTSDVEVNEK.K	VGGTSDVEVNEK	1	1	20	406	417	12	1232.59	3h
sp|P10809|CH60_HUMAN	X.VGLQVVAVK.X	VGLQVVAVK	1	1	14	293	301	9	911.577	3h
sp|P10809|CH60_HUMAN	R.VTDALNATR.A	VTDALNATR	1	1	19	421	429	9	959.503	3h
sp|P11021|GRP78_HUMAN	K.MKETAEAYLGKK.V	MKETAEAYLGKK	1	0.9944	1	153	164	12	1367.71	3h
sp|P11021|GRP78_HUMAN	K.ITITNDQNR.L	ITITNDQNR	1	0.9971	3	524	532	9	1073.55	3h
sp|P11021|GRP78_HUMAN	R.AKFEELNMDLFR.S	AKFEELNMDLFR	1	1	25	325	336	12	1511.74	3h
sp|P11021|GRP78_HUMAN	K.DAGTIAGLNVMR.I	DAGTIAGLNVMR	1	1	9	186	197	12	1216.62	3h
sp|P11021|GRP78_HUMAN	K.DNHLLGTFDLTGIPPAPR.G	DNHLLGTFDLTGIPPAPR	1	1	16	475	492	18	1933.01	3h
sp|P11021|GRP78_HUMAN	X.ELEEIVQPIISK.X	ELEEIVQPIISK	1	1	12	622	633	12	1396.78	3h
sp|P11021|GRP78_HUMAN	K.ETAEAYLGK.K	ETAEAYLGK	1	1	8	155	163	9	980.48	3h
sp|P11021|GRP78_HUMAN	K.FEELNMDLFR.S	FEELNMDLFR	1	1	5	327	336	10	1312.61	3h
sp|P11021|GRP78_HUMAN	R.IEIESFYEGEDFSETLTR.A	IEIESFYEGEDFSETLTR	1	1	1	307	324	18	2163.99	3h
sp|P11021|GRP78_HUMAN	K.IEWLESHQDADIEDFK.A	IEWLESHQDADIEDFK	1	1	21	602	617	16	1973.9	3h
sp|P11021|GRP78_HUMAN	R.IINEPTAAAIAYGLDK.R	IINEPTAAAIAYGLDK	10	1	11	198	213	16	1658.89	3h
sp|P11021|GRP78_HUMAN	R.IINEPTAAAIAYGLDKR.E	IINEPTAAAIAYGLDKR	1	1	18	198	214	17	1814.99	3h
sp|P11021|GRP78_HUMAN	R.ITPSYVAFTPEGER.L	ITPSYVAFTPEGER	1	1	14	61	74	14	1565.77	3h
sp|P11021|GRP78_HUMAN	K.KKELEEIVQPIISK.L	KKELEEIVQPIISK	1	1	9	620	633	14	1652.97	3h
sp|P11021|GRP78_HUMAN	K.KSDIDEIVLVGGSTR.I	KSDIDEIVLVGGSTR	1	1	14	353	367	15	1587.84	3h
sp|P11021|GRP78_HUMAN	K.LYGSAGPPPTGEEDTAEKDEL.-	LYGSAGPPPTGEEDTAEKDEL	1	1	15	634	654	21	2174.99	3h
sp|P11021|GRP78_HUMAN	K.MKETAEAYLGK.K	MKETAEAYLGK	1	1	13	153	163	11	1239.61	3h
sp|P11021|GRP78_HUMAN	X.NELESYAYSLK.X	NELESYAYSLK	1	1	1	563	573	11	1315.63	3h
sp|P11021|GRP78_HUMAN	K.NQLTSNPENTVFDAK.R	NQLTSNPENTVFDAK	1	1	12	82	96	15	1676.8	3h
sp|P11021|GRP78_HUMAN	K.SDIDEIVLVGGSTR.I	SDIDEIVLVGGSTR	1	1	8	354	367	14	1459.75	3h
sp|P11021|GRP78_HUMAN	K.SQIFSTASDNQPTVTIK.V	SQIFSTASDNQPTVTIK	1	1	14	448	464	17	1835.93	3h
sp|P11021|GRP78_HUMAN	K.TFAPEEISAMVLTK.M	TFAPEEISAMVLTK	1	1	19	139	152	14	1535.79	3h
sp|P11021|GRP78_HUMAN	K.TKPYIQVDIGGGQTK.T	TKPYIQVDIGGGQTK	1	1	20	124	138	15	1603.85	3h
sp|P11021|GRP78_HUMAN	R.TWNDPSVQQDIK.F	TWNDPSVQQDIK	1	1	13	102	113	12	1429.68	3h
sp|P11021|GRP78_HUMAN	K.VTHAVVTVPAYFNDAQR.Q	VTHAVVTVPAYFNDAQR	1	1	16	165	181	17	1886.96	3h
sp|P11021|GRP78_HUMAN	K.VYEGERPLTK.D	VYEGERPLTK	1	1	14	465	474	10	1190.63	3h
sp|P11142|HSP7C_HUMAN	X.HWPFMVVNDAGR.X	HWPFMVVNDAGR	11	0.9036	2	89	100	12	1427.67	3h
sp|P11142|HSP7C_HUMAN	K.FELTGIPPAPR.G	FELTGIPPAPR	6	0.9602	1	459	469	11	1196.65	3h
sp|P11142|HSP7C_HUMAN	R.LSKEDIER.M	LSKEDIER	6	0.9756	2	510	517	8	988.518	3h
sp|P11142|HSP7C_HUMAN	R.TLSSSTQASIEIDSLYEGIDFYTSITR.A	TLSSSTQASIEIDSLYEGIDFYTSITR	6	0.9844	1	273	299	27	2996.45	3h
sp|P11142|HSP7C_HUMAN	K.VQVEYKGETK.S	VQVEYKGETK	11	0.9884	4	103	112	10	1179.61	3h
sp|P11142|HSP7C_HUMAN	K.SQIHDIVLVGGSTR.I	SQIHDIVLVGGSTR	6	0.9894	6	329	342	14	1480.8	3h
sp|P11142|HSP7C_HUMAN	K.LYQSAGGMPGGMPGGFPGGGAPPSGGASSGPTIEEVD.-	LYQSAGGMPGGMPGGFPGGGAPPSGGASSGPTIEEVD	4	0.9966	7	610	646	37	3345.49	3h
sp|P11142|HSP7C_HUMAN	K.EIAEAYLGK.T	EIAEAYLGK	10	0.9992	6	129	137	9	992.516	3h
sp|P11142|HSP7C_HUMAN	R.ARFEELNADLFR.G	ARFEELNADLFR	7	1	5	300	311	12	1479.75	3h
sp|P11142|HSP7C_HUMAN	X.FDDAVVQSDMK.X	FDDAVVQSDMK	11	1	2	78	88	11	1253.56	3h
sp|P11142|HSP7C_HUMAN	X.FEELNADLFR.X	FEELNADLFR	7	1	7	302	311	10	1252.61	3h
sp|P11142|HSP7C_HUMAN	K.HWPFMVVNDAGRPK.V	HWPFMVVNDAGRPK	11	1	16	89	102	14	1652.82	3h
sp|P11142|HSP7C_HUMAN	K.LLQDFFNGK.E	LLQDFFNGK	8	1	5	349	357	9	1080.56	3h
sp|P11142|HSP7C_HUMAN	K.MKEIAEAYLGK.T	MKEIAEAYLGK	10	1	4	127	137	11	1251.65	3h
sp|P11142|HSP7C_HUMAN	R.MVNHFIAEFK.R	MVNHFIAEFK	5	1	25	237	246	10	1234.61	3h
sp|P11142|HSP7C_HUMAN	K.NQTAEKEEFEHQQK.E	NQTAEKEEFEHQQK	6	1	7	584	597	14	1744.8	3h
sp|P11142|HSP7C_HUMAN	K.NQVAMNPTNTVFDAK.R	NQVAMNPTNTVFDAK	10	1	19	57	71	15	1648.79	3h
sp|P11142|HSP7C_HUMAN	K.NSLESYAFNMK.A	NSLESYAFNMK	6	1	6	540	550	11	1302.59	3h
sp|P11142|HSP7C_HUMAN	K.QTQTFTTYSDNQPGVLIQVYEGER.A	QTQTFTTYSDNQPGVLIQVYEGER	6	1	24	424	447	24	2773.32	3h
sp|P11142|HSP7C_HUMAN	R.RFDDAVVQSDMK.H	RFDDAVVQSDMK	11	1	20	77	88	12	1409.66	3h
sp|P11142|HSP7C_HUMAN	K.SFYPEEVSSMVLTK.M	SFYPEEVSSMVLTK	11	1	7	113	126	14	1615.78	3h
sp|P11142|HSP7C_HUMAN	K.SINPDEAVAYGAAVQAAILSGDK.S	SINPDEAVAYGAAVQAAILSGDK	5	1	27	362	384	23	2259.14	3h
sp|P11142|HSP7C_HUMAN	K.STAGDTHLGGEDFDNR.M	STAGDTHLGGEDFDNR	5	1	21	221	236	16	1690.72	3h
sp|P11142|HSP7C_HUMAN	R.TTPSYVAFTDTER.L	TTPSYVAFTDTER	22	1	9	37	49	13	1486.69	3h
sp|P11142|HSP7C_HUMAN	K.TVTNAVVTVPAYFNDSQR.Q	TVTNAVVTVPAYFNDSQR	8	1	21	138	155	18	1980.99	3h
sp|P11166|GTR1_HUMAN	K.VTILELFR.S	VTILELFR	2	0.9992	14	257	264	8	989.59	3h
sp|P11172|PYR5_HUMAN	K.GLQEVGLPLHR.G	GLQEVGLPLHR	2	0.9599	1	353	363	11	1217.69	3h
sp|P11172|PYR5_HUMAN	R.AALGPLVTGLYDVQAFK.F	AALGPLVTGLYDVQAFK	5	1	4	6	22	17	1761.96	3h
sp|P11177|ODPB_HUMAN	R.TIRPMDMETIEASVMK.T	TIRPMDMETIEASVMK	3	1	4	270	285	16	1850.89	3h
sp|P11177|ODPB_HUMAN	K.TYYMSGGLQPVPIVFR.G	TYYMSGGLQPVPIVFR	2	1	5	130	145	16	1826.94	3h
sp|P11177|ODPB_HUMAN	R.VTGADVPMPYAK.I	VTGADVPMPYAK	2	1	1	325	336	12	1247.62	3h
sp|P11216|PYGB_HUMAN	R.LKQEYFVVAATLQDIIR.R	LKQEYFVVAATLQDIIR	6	1	6	294	310	17	2006.12	3h
sp|P11233|RALA_HUMAN	R.AEQWNVNYVETSAK.T	AEQWNVNYVETSAK	1	1	1	146	159	14	1637.77	3h
sp|P11279|LAMP1_HUMAN	K.TVESITDIR.A	TVESITDIR	1	0.9997	2	138	146	9	1032.55	3h
sp|P11279|LAMP1_HUMAN	R.ALQATVGNSYK.C	ALQATVGNSYK	2	1	11	327	337	11	1150.6	3h
sp|P11310|ACADM_HUMAN	K.ENVLIGDGAGFK.V	ENVLIGDGAGFK	2	0.9998	7	260	271	12	1218.62	3h
sp|P11310|ACADM_HUMAN	K.AFAGDIANQLATDAVQILGGNGFNTEYPVEK.L	AFAGDIANQLATDAVQILGGNGFNTEYPVEK	2	1	3	359	389	31	3222.58	3h
sp|P11310|ACADM_HUMAN	K.ANWYFLLAR.S	ANWYFLLAR	2	1	12	198	206	9	1152.61	3h
sp|P11387|TOP1_HUMAN	K.ELTAPDENIPAK.I	ELTAPDENIPAK	1	0.9988	3	604	615	12	1296.66	3h
sp|P11388|TOP2A_HUMAN	R.EVTFVPGLYK.I	EVTFVPGLYK	6	0.9749	1	74	83	10	1151.62	3h
sp|P11388|TOP2A_HUMAN	R.KEWLTNFMEDR.R	KEWLTNFMEDR	6	0.9896	1	662	672	11	1467.68	3h
sp|P11388|TOP2A_HUMAN	X.GLLINFIHHNWPSLLR.X	GLLINFIHHNWPSLLR	4	0.9991	1	551	566	16	1929.07	3h
sp|P11388|TOP2A_HUMAN	X.IFDEILVNAADNK.X	IFDEILVNAADNK	6	1	5	84	96	13	1460.75	3h
sp|P11388|TOP2A_HUMAN	R.LMDGEEPLPMLPSYK.N	LMDGEEPLPMLPSYK	4	1	5	879	893	15	1718.82	3h
sp|P11413|G6PD_HUMAN	X.LNSHMNALHLGSQANR.X	LNSHMNALHLGSQANR	5	0.9882	1	121	136	16	1761.87	3h
sp|P11413|G6PD_HUMAN	K.GYLDDPTVPR.G	GYLDDPTVPR	3	0.9967	2	321	330	10	1131.56	3h
sp|P11413|G6PD_HUMAN	K.IYPTIWWLFR.D	IYPTIWWLFR	5	0.9991	4	48	57	10	1393.75	3h
sp|P11413|G6PD_HUMAN	X.LKLEDFFAR.X	LKLEDFFAR	5	0.9993	11	96	104	9	1137.62	3h
sp|P11413|G6PD_HUMAN	R.NSYVAGQYDDAASYQR.L	NSYVAGQYDDAASYQR	5	1	1	105	120	16	1806.78	3h
sp|P11586|C1TC_HUMAN	R.IFHELTQTDK.A	IFHELTQTDK	1	0.9761	3	464	473	10	1230.62	3h
sp|P11586|C1TC_HUMAN	R.LAILQVGNR.D	LAILQVGNR	1	0.9974	5	38	46	9	982.591	3h
sp|P11586|C1TC_HUMAN	K.TDPTTLTDEEINR.F	TDPTTLTDEEINR	1	0.9994	10	505	517	13	1503.71	3h
sp|P11586|C1TC_HUMAN	R.ASFITPVPGGVGPMTVAMLMQSTVESAK.R	ASFITPVPGGVGPMTVAMLMQSTVESAK	1	0.9999	3	265	292	28	2805.41	3h
sp|P11586|C1TC_HUMAN	R.AAQAPSSFQLLYDLK.L	AAQAPSSFQLLYDLK	1	1	2	805	819	15	1650.86	3h
sp|P11586|C1TC_HUMAN	R.KVVGDVAYDEAK.E	KVVGDVAYDEAK	1	1	2	251	262	12	1292.66	3h
sp|P11586|C1TC_HUMAN	R.LDIDPETITWQR.V	LDIDPETITWQR	1	1	6	521	532	12	1485.75	3h
sp|P11586|C1TC_HUMAN	R.MFGIPVVVAVNAFK.T	MFGIPVVVAVNAFK	1	1	12	747	760	14	1490.83	3h
sp|P11586|C1TC_HUMAN	K.TDTESELDLISR.L	TDTESELDLISR	1	1	9	761	772	12	1377.66	3h
sp|P11586|C1TC_HUMAN	K.TPVPSDIDISR.S	TPVPSDIDISR	1	1	12	314	324	11	1198.62	3h
sp|P11586|C1TC_HUMAN	K.WMIQYNNLNLK.T	WMIQYNNLNLK	1	1	7	303	313	11	1435.73	3h
sp|P11586|C1TC_HUMAN	K.YVVVTGITPTPLGEGK.S	YVVVTGITPTPLGEGK	1	1	5	371	386	16	1629.89	3h
sp|P11678|PERE_HUMAN	X.RPLLGASNQALAR.X	RPLLGASNQALAR	1	0.9008	1	157	169	13	1365.78	3h
sp|P11678|PERE_HUMAN	R.KIMGAMVQIITYR.D	KIMGAMVQIITYR	1	0.986	1	420	432	13	1522.83	3h
sp|P11678|PERE_HUMAN	X.LAAMHTLFMR.X	LAAMHTLFMR	1	0.988	5	384	393	10	1189.61	3h
sp|P11678|PERE_HUMAN	R.DFLPLVLGK.A	DFLPLVLGK	1	0.9965	9	433	441	9	1000.59	3h
sp|P11678|PERE_HUMAN	R.QDAMLVDELR.D	QDAMLVDELR	1	0.9992	1	532	541	10	1188.58	3h
sp|P11678|PERE_HUMAN	R.AADYMHVALGLLEEK.L	AADYMHVALGLLEEK	1	1	10	89	103	15	1658.83	3h
sp|P11678|PERE_HUMAN	R.ALMFMQWGQFIDHDLDFSPESPAR.V	ALMFMQWGQFIDHDLDFSPESPAR	1	1	14	221	244	24	2837.29	3h
sp|P11678|PERE_HUMAN	R.ASAPNSHVPLSSAFFASWR.I	ASAPNSHVPLSSAFFASWR	1	1	1	490	508	19	2030.99	3h
sp|P11678|PERE_HUMAN	R.IGLDLAALNMQR.S	IGLDLAALNMQR	1	1	9	551	562	12	1313.71	3h
sp|P11678|PERE_HUMAN	R.IVYEGGIDPILR.G	IVYEGGIDPILR	1	1	5	509	520	12	1343.74	3h
sp|P11678|PERE_HUMAN	R.NGFLLPLVR.A	NGFLLPLVR	1	1	10	192	200	9	1027.62	3h
sp|P11678|PERE_HUMAN	R.SGSASPMDLLSYFK.Q	SGSASPMDLLSYFK	1	1	10	64	77	14	1501.71	3h
sp|P11678|PERE_HUMAN	R.WLPAEYEDGLSLPFGWTPSR.R	WLPAEYEDGLSLPFGWTPSR	1	1	12	170	189	20	2320.11	3h
sp|P11766|ADHX_HUMAN	K.AFELMHSGK.S	AFELMHSGK	2	0.9087	1	358	366	9	1018.49	3h
sp|P11766|ADHX_HUMAN	K.LVSEYMSK.K	LVSEYMSK	2	0.9718	1	331	338	8	955.466	3h
sp|P11766|ADHX_HUMAN	K.AAVAWEAGKPLSIEEIEVAPPK.A	AAVAWEAGKPLSIEEIEVAPPK	5	1	1	10	31	22	2304.23	3h
sp|P11908|PRPS2_HUMAN	X.LNVEFALIHK.X	LNVEFALIHK	1	0.988	1	185	194	10	1182.67	3h
sp|P11908|PRPS2_HUMAN	X.THNGESVSYLFSHVPL.X	THNGESVSYLFSHVPL	4	0.9908	1	303	318	16	1785.87	3h
sp|P11908|PRPS2_HUMAN	X.VYAILTHGIFSGPAISR.X	VYAILTHGIFSGPAISR	4	1	5	244	260	17	1800.99	3h
sp|P11940|PABP1_HUMAN	K.FGPALSVK.V	FGPALSVK	5	0.9965	5	214	221	8	817.467	3h
sp|P11940|PABP1_HUMAN	X.MNGMLLNDR.X	MNGMLLNDR	6	0.9982	4	158	166	9	1062.49	3h
sp|P11940|PABP1_HUMAN	K.NFGEDMDDER.L	NFGEDMDDER	5	0.9984	2	197	206	10	1226.45	3h
sp|P11940|PABP1_HUMAN	R.NPQQHLNAQPQVTMQQPAVHVQGQEPLTASMLASAPPQEQK.Q	NPQQHLNAQPQVTMQQPAVHVQGQEPLTASMLASAPPQEQK	3	0.9988	5	519	559	41	4456.2	3h
sp|P11940|PABP1_HUMAN	R.KSGVGNIFIK.N	KSGVGNIFIK	8	0.9991	2	95	104	10	1061.62	3h
sp|P11940|PABP1_HUMAN	X.LFPLIQAMHPTLAGK.X	LFPLIQAMHPTLAGK	5	0.9992	12	566	580	15	1635.91	3h
sp|P11940|PABP1_HUMAN	K.EFSPFGTITSAK.V	EFSPFGTITSAK	3	0.9998	1	313	324	12	1283.64	3h
sp|P11940|PABP1_HUMAN	R.YQGVNLYVK.N	YQGVNLYVK	5	0.9998	3	291	299	9	1082.57	3h
sp|P11940|PABP1_HUMAN	R.AKEFTNVYIK.N	AKEFTNVYIK	6	1	4	187	196	10	1211.65	3h
sp|P11940|PABP1_HUMAN	R.ALDTMNFDVIK.G	ALDTMNFDVIK	10	1	6	68	78	11	1265.63	3h
sp|P11940|PABP1_HUMAN	K.ALYDTFSAFGNILSCK.V	ALYDTFSAFGNILSCK	8	1	6	114	129	16	1748.84	3h
sp|P11940|PABP1_HUMAN	K.GFGFVSFER.H	GFGFVSFER	5	1	7	232	240	9	1044.5	3h
sp|P11940|PABP1_HUMAN	K.ITGMLLEIDNSELLHMLESPESLR.S	ITGMLLEIDNSELLHMLESPESLR	7	1	11	581	604	24	2739.38	3h
sp|P11940|PABP1_HUMAN	R.IVATKPLYVALAQR.K	IVATKPLYVALAQR	5	1	9	357	370	14	1541.93	3h
sp|P11940|PABP1_HUMAN	R.QAHLTNQYMQR.M	QAHLTNQYMQR	3	1	2	375	385	11	1388.66	3h
sp|P11940|PABP1_HUMAN	K.SGVGNIFIK.N	SGVGNIFIK	8	1	3	96	104	9	933.525	3h
sp|P11940|PABP1_HUMAN	R.SLGYAYVNFQQPADAER.A	SLGYAYVNFQQPADAER	11	1	15	51	67	17	1927.9	3h
sp|P12004|PCNA_HUMAN	R.SEGFDTYR.C	SEGFDTYR	1	0.9976	7	54	61	8	973.413	3h
sp|P12004|PCNA_HUMAN	R.LVQGSILK.K	LVQGSILK	1	0.9987	8	6	13	8	856.536	3h
sp|P12004|PCNA_HUMAN	K.MPSGEFAR.I	MPSGEFAR	1	0.9989	6	139	146	8	893.405	3h
sp|P12004|PCNA_HUMAN	K.IADMGHLK.Y	IADMGHLK	1	0.9991	4	241	248	8	883.456	3h
sp|P12004|PCNA_HUMAN	R.AEDNADTLALVFEAPNQEK.V	AEDNADTLALVFEAPNQEK	1	1	25	92	110	19	2073.99	3h
sp|P12004|PCNA_HUMAN	K.ATPLSSTVTLSMSADVPLVVEYK.I	ATPLSSTVTLSMSADVPLVVEYK	1	1	9	218	240	23	2407.25	3h
sp|P12004|PCNA_HUMAN	R.DLSHIGDAVVISCAK.D	DLSHIGDAVVISCAK	1	1	5	150	164	15	1526.77	3h
sp|P12004|PCNA_HUMAN	K.FSASGELGNGNIK.L	FSASGELGNGNIK	1	1	11	169	181	13	1292.63	3h
sp|P12004|PCNA_HUMAN	K.LMDLDVEQLGIPEQEYSCVVK.M	LMDLDVEQLGIPEQEYSCVVK	1	1	2	118	138	21	2407.16	3h
sp|P12004|PCNA_HUMAN	K.LSQTSNVDKEEEAVTIEMNEPVQLTFALR.Y	LSQTSNVDKEEEAVTIEMNEPVQLTFALR	1	1	14	182	210	29	3290.63	3h
sp|P12004|PCNA_HUMAN	R.NLAMGVNLTSMSK.I	NLAMGVNLTSMSK	1	1	12	65	77	13	1364.68	3h
sp|P12081|SYHC_HUMAN	K.ISFDLSLAR.G	ISFDLSLAR	16	0.9919	1	318	326	9	1020.56	3h
sp|P12081|SYHC_HUMAN	K.QALEGLGDLK.L	QALEGLGDLK	16	0.9974	1	294	303	10	1042.56	3h
sp|P12081|SYHC_HUMAN	R.TTETQVLVASAQK.K	TTETQVLVASAQK	7	0.9992	1	406	418	13	1374.73	3h
sp|P12081|SYHC_HUMAN	K.LLFEYLTLFGIDDK.I	LLFEYLTLFGIDDK	8	1	3	304	317	14	1685.89	3h
sp|P12268|IMDH2_HUMAN	X.GMGSLDAMDK.X	GMGSLDAMDK	1	0.9758	1	413	422	10	1023.43	3h
sp|P12268|IMDH2_HUMAN	K.EANEILQR.S	EANEILQR	10	0.9878	5	196	203	8	971.504	3h
sp|P12268|IMDH2_HUMAN	X.ALALGASTVMMGSLLAATTEAPGEYFFSDGIR.X	ALALGASTVMMGSLLAATTEAPGEYFFSDGIR	1	0.9991	2	376	407	32	3246.59	3h
sp|P12268|IMDH2_HUMAN	K.DKYPNLQVIGGNVVTAAQAK.N	DKYPNLQVIGGNVVTAAQAK	1	1	16	292	311	20	2085.12	3h
sp|P12268|IMDH2_HUMAN	R.FGVPVIADGGIQNVGHIAK.A	FGVPVIADGGIQNVGHIAK	1	1	19	357	375	19	1891.03	3h
sp|P12268|IMDH2_HUMAN	K.GKLPIVNEDDELVAIIAR.T	GKLPIVNEDDELVAIIAR	2	1	11	207	224	18	1964.09	3h
sp|P12268|IMDH2_HUMAN	K.KYEQGFITDPVVLSPK.D	KYEQGFITDPVVLSPK	1	1	17	109	124	16	1819.97	3h
sp|P12268|IMDH2_HUMAN	K.LPIVNEDDELVAIIAR.T	LPIVNEDDELVAIIAR	2	1	15	209	224	16	1778.98	3h
sp|P12268|IMDH2_HUMAN	K.NLIDAGVDALR.V	NLIDAGVDALR	1	1	1	312	322	11	1155.62	3h
sp|P12268|IMDH2_HUMAN	K.REDLVVAPAGITLK.E	REDLVVAPAGITLK	2	1	14	182	195	14	1480.86	3h
sp|P12268|IMDH2_HUMAN	R.TSSAQVEGGVHSLHSYEK.R	TSSAQVEGGVHSLHSYEK	1	1	20	494	511	18	1914.9	3h
sp|P12268|IMDH2_HUMAN	K.VAQGVSGAVQDK.G	VAQGVSGAVQDK	1	1	17	439	450	12	1157.6	3h
sp|P12270|TPR_HUMAN	X.LDELQASDVSVK.X	LDELQASDVSVK	1	0.9898	2	166	177	12	1302.66	3h
sp|P12270|TPR_HUMAN	R.GQNLLLTNLQTIQGILER.S	GQNLLLTNLQTIQGILER	1	0.9974	1	811	828	18	2023.14	3h
sp|P12270|TPR_HUMAN	X.QEQIINTMTQDLR.X	QEQIINTMTQDLR	1	0.9989	1	756	768	13	1588.79	3h
sp|P12270|TPR_HUMAN	R.NLQEQTVQLQSELSR.L	NLQEQTVQLQSELSR	1	1	1	1513	1527	15	1771.91	3h
sp|P12694|ODBA_HUMAN	R.AVAENQPFLIEAMTYR.I	AVAENQPFLIEAMTYR	1	1	1	317	332	16	1851.92	3h
sp|P12814|ACTN1_HUMAN	K.NYITMDELR.R	NYITMDELR	2	0.9971	2	841	849	9	1153.54	3h
sp|P12814|ACTN1_HUMAN	X.LAILGIHNEVSK.X	LAILGIHNEVSK	3	1	7	566	577	12	1292.74	3h
sp|P12814|ACTN1_HUMAN	K.VLAVNQENEQLMEDYEK.L	VLAVNQENEQLMEDYEK	3	1	5	265	281	17	2050.95	3h
sp|P12956|XRCC6_HUMAN	R.VHFEESSKLEDLLR.K	VHFEESSKLEDLLR	4	0.975	1	231	244	14	1700.87	3h
sp|P12956|XRCC6_HUMAN	X.ALKPPPIK.X	ALKPPPIK	4	0.9753	2	280	287	8	862.562	3h
sp|P12956|XRCC6_HUMAN	X.QELLEALTK.X	QELLEALTK	3	0.9764	6	597	605	9	1043.59	3h
sp|P12956|XRCC6_HUMAN	K.IMATPEQVGK.M	IMATPEQVGK	4	0.9922	2	452	461	10	1072.56	3h
sp|P12956|XRCC6_HUMAN	X.FDDPGLMLMGFK.X	FDDPGLMLMGFK	4	0.9928	7	340	351	12	1369.64	3h
sp|P12956|XRCC6_HUMAN	R.ILELDQFK.G	ILELDQFK	4	0.9965	4	116	123	8	1004.55	3h
sp|P12956|XRCC6_HUMAN	X.IMLFTNEDNPHGNDSAK.X	IMLFTNEDNPHGNDSAK	4	0.9983	4	166	182	17	1901.86	3h
sp|P12956|XRCC6_HUMAN	K.ELVYPPDYNPEGK.V	ELVYPPDYNPEGK	4	0.9992	1	527	539	13	1519.72	3h
sp|P12956|XRCC6_HUMAN	R.DIISIAEDEDLR.V	DIISIAEDEDLR	4	1	10	219	230	12	1387.68	3h
sp|P12956|XRCC6_HUMAN	R.DTGIFLDLMHLK.K	DTGIFLDLMHLK	4	1	18	195	206	12	1401.73	3h
sp|P12956|XRCC6_HUMAN	R.FDDPGLMLMGFKPLVLLK.K	FDDPGLMLMGFKPLVLLK	4	1	20	340	357	18	2033.1	3h
sp|P12956|XRCC6_HUMAN	K.IQVTPPGFQLVFLPFADDK.R	IQVTPPGFQLVFLPFADDK	4	1	24	425	443	19	2131.13	3h
sp|P12956|XRCC6_HUMAN	K.IQVTPPGFQLVFLPFADDKR.K	IQVTPPGFQLVFLPFADDKR	4	1	15	425	444	20	2287.23	3h
sp|P12956|XRCC6_HUMAN	K.KPGGFDISLFYR.D	KPGGFDISLFYR	4	1	8	207	218	12	1398.73	3h
sp|P12956|XRCC6_HUMAN	K.KQELLEALTK.H	KQELLEALTK	3	1	6	596	605	10	1171.68	3h
sp|P12956|XRCC6_HUMAN	X.NIPPYFVALVPQEEELDDQK.X	NIPPYFVALVPQEEELDDQK	4	1	7	405	424	20	2343.16	3h
sp|P12956|XRCC6_HUMAN	K.NIYVLQELDNPGAK.R	NIYVLQELDNPGAK	3	1	6	101	114	14	1572.81	3h
sp|P12956|XRCC6_HUMAN	R.NLEALALDLMEPEQAVDLTLPK.V	NLEALALDLMEPEQAVDLTLPK	4	1	28	489	510	22	2422.27	3h
sp|P12956|XRCC6_HUMAN	X.PSLFVYPEESLVIGSSTLFSALLIK.X	PSLFVYPEESLVIGSSTLFSALLIK	4	1	2	364	388	25	2709.49	3h
sp|P12956|XRCC6_HUMAN	R.SDSFENPVLQQHFR.N	SDSFENPVLQQHFR	4	1	13	475	488	14	1702.81	3h
sp|P12956|XRCC6_HUMAN	K.TEGDEEAEEEQEENLEASGDYK.Y	TEGDEEAEEEQEENLEASGDYK	3	1	1	10	31	22	2499.99	3h
sp|P12956|XRCC6_HUMAN	R.TFNTSTGGLLLPSDTK.R	TFNTSTGGLLLPSDTK	4	1	14	302	317	16	1650.85	3h
sp|P12956|XRCC6_HUMAN	R.TFNTSTGGLLLPSDTKR.S	TFNTSTGGLLLPSDTKR	4	1	4	302	318	17	1806.95	3h
sp|P13010|XRCC5_HUMAN	K.TLFPLIEAK.K	TLFPLIEAK	1	0.9736	1	535	543	9	1030.61	3h
sp|P13010|XRCC5_HUMAN	K.KASFEEASNQLINHIEQFLDTNETPYFMK.S	KASFEEASNQLINHIEQFLDTNETPYFMK	1	0.9863	2	606	634	29	3443.63	3h
sp|P13010|XRCC5_HUMAN	K.VITMFVQR.Q	VITMFVQR	2	0.9974	4	37	44	8	992.546	3h
sp|P13010|XRCC5_HUMAN	X.HIEIFTDLSSR.X	HIEIFTDLSSR	2	0.9991	1	131	141	11	1316.67	3h
sp|P13010|XRCC5_HUMAN	X.SQLDIIIHSLK.X	SQLDIIIHSLK	1	0.9991	1	145	155	11	1265.73	3h
sp|P13010|XRCC5_HUMAN	R.ANPQVGVAFPHIK.H	ANPQVGVAFPHIK	1	1	5	401	413	13	1376.75	3h
sp|P13010|XRCC5_HUMAN	K.ASFEEASNQLINHIEQFLDTNETPYFMK.S	ASFEEASNQLINHIEQFLDTNETPYFMK	1	1	15	607	634	28	3315.54	3h
sp|P13010|XRCC5_HUMAN	R.DDEAAAVALSSLIHALDDLDMVAIVR.Y	DDEAAAVALSSLIHALDDLDMVAIVR	1	1	14	369	394	26	2722.38	3h
sp|P13010|XRCC5_HUMAN	K.DKPSGDTAAVFEEGGDVDDLLDMI.-	DKPSGDTAAVFEEGGDVDDLLDMI	1	1	12	709	732	24	2508.12	3h
sp|P13010|XRCC5_HUMAN	X.DQVTAQEIFQDNHEDGPTAK.X	DQVTAQEIFQDNHEDGPTAK	1	1	8	546	565	20	2242.01	3h
sp|P13010|XRCC5_HUMAN	K.EEASGSSVTAEEAKK.F	EEASGSSVTAEEAKK	1	1	2	689	703	15	1521.71	3h
sp|P13010|XRCC5_HUMAN	X.EPLPPIQQHIWNMLNPPAEVTTK.X	EPLPPIQQHIWNMLNPPAEVTTK	1	1	12	503	525	23	2652.37	3h
sp|P13010|XRCC5_HUMAN	R.HLMLPDFDLLEDIESK.I	HLMLPDFDLLEDIESK	2	1	13	82	97	16	1913.94	3h
sp|P13010|XRCC5_HUMAN	X.IQPGSQQADFLDALIVSMDVIQHETIGK.X	IQPGSQQADFLDALIVSMDVIQHETIGK	2	1	10	98	125	28	3052.55	3h
sp|P13010|XRCC5_HUMAN	K.KKDQVTAQEIFQDNHEDGPTAK.K	KKDQVTAQEIFQDNHEDGPTAK	1	1	1	544	565	22	2498.2	3h
sp|P13010|XRCC5_HUMAN	K.KYAPTEAQLNAVDALIDSMSLAK.K	KYAPTEAQLNAVDALIDSMSLAK	1	1	4	443	465	23	2448.25	3h
sp|P13010|XRCC5_HUMAN	R.LGGHGPSFPLK.G	LGGHGPSFPLK	1	1	9	185	195	11	1108.6	3h
sp|P13010|XRCC5_HUMAN	K.QLNHFWEIVVQDGITLITK.E	QLNHFWEIVVQDGITLITK	1	1	37	670	688	19	2253.21	3h
sp|P13010|XRCC5_HUMAN	K.TDTLEDLFPTTK.I	TDTLEDLFPTTK	1	1	10	470	481	12	1379.68	3h
sp|P13010|XRCC5_HUMAN	X.TEQGGAHFSVSSLAEGSVTSVGSVNPAENFR.X	TEQGGAHFSVSSLAEGSVTSVGSVNPAENFR	1	1	1	569	599	31	3120.47	3h
sp|P13010|XRCC5_HUMAN	K.YAPTEAQLNAVDALIDSMSLAK.K	YAPTEAQLNAVDALIDSMSLAK	1	1	28	444	465	22	2320.16	3h
sp|P13073|COX41_HUMAN	R.DHPLPEVAHVK.H	DHPLPEVAHVK	1	1	6	43	53	11	1240.65	3h
sp|P13073|COX41_HUMAN	K.SEDFSLPAYMDR.R	SEDFSLPAYMDR	1	1	7	30	41	12	1429.62	3h
sp|P13164|IFM1_HUMAN	K.MVGDVTGAQAYASTAK.C	MVGDVTGAQAYASTAK	6	1	10	68	83	16	1568.75	3h
sp|P13473|LAMP2_HUMAN	K.GILTVDELLAIR.I	GILTVDELLAIR	2	1	10	133	144	12	1311.78	3h
sp|P13473|LAMP2_HUMAN	R.IPLNDLFR.C	IPLNDLFR	2	1	14	145	152	8	986.554	3h
sp|P13473|LAMP2_HUMAN	K.YLDFVFAVK.N	YLDFVFAVK	3	1	12	281	289	9	1100.59	3h
sp|P13489|RINI_HUMAN	K.ELTVSNNDINEAGVR.V	ELTVSNNDINEAGVR	4	1	11	174	188	15	1629.8	3h
sp|P13639|EF2_HUMAN	X.VNFTVDQIR.X	VNFTVDQIR	2	0.9748	7	2	10	9	1090.58	3h
sp|P13639|EF2_HUMAN	R.IMGPNYTPGK.K	IMGPNYTPGK	1	0.9885	4	429	438	10	1076.53	3h
sp|P13639|EF2_HUMAN	K.FSVSPVVR.V	FSVSPVVR	1	0.9955	8	499	506	8	889.5	3h
sp|P13639|EF2_HUMAN	X.GEGQLGPAER.X	GEGQLGPAER	2	0.9957	4	240	249	10	1012.49	3h
sp|P13639|EF2_HUMAN	R.IKPVLMMNK.M	IKPVLMMNK	2	0.9972	3	151	159	9	1072.61	3h
sp|P13639|EF2_HUMAN	R.FDVHDVTLHADAIHR.G	FDVHDVTLHADAIHR	2	0.9983	3	702	716	15	1744.86	3h
sp|P13639|EF2_HUMAN	X.GVQYLNEIK.X	GVQYLNEIK	2	0.999	11	668	676	9	1062.57	3h
sp|P13639|EF2_HUMAN	R.GGGQIIPTAR.R	GGGQIIPTAR	4	0.9992	3	717	726	10	968.539	3h
sp|P13639|EF2_HUMAN	K.SDPVVSYR.E	SDPVVSYR	2	0.9996	6	573	580	8	921.454	3h
sp|P13639|EF2_HUMAN	R.ALLELQLEPEELYQTFQR.I	ALLELQLEPEELYQTFQR	2	1	24	163	180	18	2219.15	3h
sp|P13639|EF2_HUMAN	K.ARPFPDGLAEDIDKGEVSAR.Q	ARPFPDGLAEDIDKGEVSAR	2	1	31	606	625	20	2142.07	3h
sp|P13639|EF2_HUMAN	K.AYLPVNESFGFTADLR.S	AYLPVNESFGFTADLR	2	1	14	786	801	16	1798.89	3h
sp|P13639|EF2_HUMAN	K.EDLYLKPIQR.T	EDLYLKPIQR	1	1	12	440	449	10	1273.7	3h
sp|P13639|EF2_HUMAN	K.EGIPALDNFLDK.L	EGIPALDNFLDK	2	1	7	846	857	12	1330.67	3h
sp|P13639|EF2_HUMAN	K.EGIPALDNFLDKL.-	EGIPALDNFLDKL	2	1	14	846	858	13	1443.76	3h
sp|P13639|EF2_HUMAN	X.GHVFEESQVAGTPMFVVK.X	GHVFEESQVAGTPMFVVK	2	1	1	768	785	18	1960.97	3h
sp|P13639|EF2_HUMAN	K.GPLMMYISK.M	GPLMMYISK	1	1	14	392	400	9	1038.52	3h
sp|P13639|EF2_HUMAN	K.GVQYLNEIKDSVVAGFQWATK.E	GVQYLNEIKDSVVAGFQWATK	2	1	9	668	688	21	2352.21	3h
sp|P13639|EF2_HUMAN	K.IWCFGPDGTGPNILTDITK.G	IWCFGPDGTGPNILTDITK	2	1	3	649	667	19	2047.01	3h
sp|P13639|EF2_HUMAN	K.KEDLYLKPIQR.T	KEDLYLKPIQR	1	1	6	439	449	11	1401.8	3h
sp|P13639|EF2_HUMAN	R.KIWCFGPDGTGPNILTDITK.G	KIWCFGPDGTGPNILTDITK	2	1	3	648	667	20	2175.1	3h
sp|P13639|EF2_HUMAN	R.NMSVIAHVDHGK.S	NMSVIAHVDHGK	2	1	21	21	32	12	1306.64	3h
sp|P13639|EF2_HUMAN	R.RWLPAGDALLQMITIHLPSPVTAQK.Y	RWLPAGDALLQMITIHLPSPVTAQK	1	1	10	342	366	25	2755.52	3h
sp|P13639|EF2_HUMAN	X.STAISLFYELSENDLNFIK.X	STAISLFYELSENDLNFIK	2	1	19	72	90	19	2203.1	3h
sp|P13639|EF2_HUMAN	K.TGTITTFEHAHNMR.V	TGTITTFEHAHNMR	1	1	7	482	495	14	1614.76	3h
sp|P13639|EF2_HUMAN	R.VFSGLVSTGLK.V	VFSGLVSTGLK	1	1	3	416	426	11	1106.63	3h
sp|P13639|EF2_HUMAN	R.WLPAGDALLQMITIHLPSPVTAQK.Y	WLPAGDALLQMITIHLPSPVTAQK	1	1	36	343	366	24	2599.42	3h
sp|P13639|EF2_HUMAN	K.YEWDVAEAR.K	YEWDVAEAR	2	1	2	639	647	9	1137.51	3h
sp|P13639|EF2_HUMAN	R.YFDPANGK.F	YFDPANGK	1	1	3	265	272	8	910.416	3h
sp|P13639|EF2_HUMAN	R.YVEPIEDVPCGNIVGLVGVDQFLVK.T	YVEPIEDVPCGNIVGLVGVDQFLVK	1	1	4	457	481	25	2701.4	3h
sp|P13645|K1C10_HUMAN	R.LENEIQTYR.S	LENEIQTYR	6	0.9818	4	442	450	9	1164.58	3h
sp|P13645|K1C10_HUMAN	K.VTMQNLNDR.L	VTMQNLNDR	20	0.9974	5	148	156	9	1089.52	3h
sp|P13645|K1C10_HUMAN	R.KDAEAWFNEK.S	KDAEAWFNEK	6	0.9981	1	334	343	10	1236.58	3h
sp|P13645|K1C10_HUMAN	R.QSVEADINGLR.R	QSVEADINGLR	11	0.9984	4	246	256	11	1200.61	3h
sp|P13645|K1C10_HUMAN	K.ADLEMQIESLTEELAYLK.K	ADLEMQIESLTEELAYLK	4	1	15	267	284	18	2095.04	3h
sp|P13645|K1C10_HUMAN	K.ADLEMQIESLTEELAYLKK.N	ADLEMQIESLTEELAYLKK	4	1	5	267	285	19	2223.13	3h
sp|P13645|K1C10_HUMAN	R.ALEESNYELEGK.I	ALEESNYELEGK	5	1	2	166	177	12	1380.64	3h
sp|P13645|K1C10_HUMAN	K.DAEAWFNEK.S	DAEAWFNEK	8	1	5	335	343	9	1108.48	3h
sp|P13645|K1C10_HUMAN	K.ELTTEIDNNIEQISSYK.S	ELTTEIDNNIEQISSYK	6	1	5	346	362	17	1995.96	3h
sp|P13645|K1C10_HUMAN	K.GSLGGGFSSGGFSGGSFSR.G	GSLGGGFSSGGFSGGSFSR	4	1	3	41	59	19	1706.76	3h
sp|P13645|K1C10_HUMAN	R.GSSGGGCFGGSSGGYGGLGGFGGGSFR.G	GSSGGGCFGGSSGGYGGLGGFGGGSFR	2	1	7	60	86	27	2284.95	3h
sp|P13645|K1C10_HUMAN	R.NVSTGDVNVEMNAAPGVDLTQLLNNMR.S	NVSTGDVNVEMNAAPGVDLTQLLNNMR	5	1	6	296	322	27	2871.38	3h
sp|P13645|K1C10_HUMAN	K.QSLEASLAETEGR.Y	QSLEASLAETEGR	6	1	5	387	399	13	1389.67	3h
sp|P13645|K1C10_HUMAN	R.SGGGGGGGGCGGGGGVSSLR.I	SGGGGGGGGCGGGGGVSSLR	3	1	3	16	35	20	1491.64	3h
sp|P13645|K1C10_HUMAN	R.SLLEGEGSSGGGGR.G	SLLEGEGSSGGGGR	4	1	5	451	464	14	1261.59	3h
sp|P13645|K1C10_HUMAN	R.SQYEQLAEQNR.K	SQYEQLAEQNR	5	1	6	323	333	11	1364.63	3h
sp|P13645|K1C10_HUMAN	R.SQYEQLAEQNRK.D	SQYEQLAEQNRK	5	1	7	323	334	12	1492.73	3h
sp|P13645|K1C10_HUMAN	K.TIDDLKNQILNLTTDNANILLQIDNAR.L	TIDDLKNQILNLTTDNANILLQIDNAR	6	1	5	202	228	27	3051.62	3h
sp|P13645|K1C10_HUMAN	R.YCVQLSQIQAQISALEEQLQQIR.A	YCVQLSQIQAQISALEEQLQQIR	4	1	8	400	422	23	2688.39	3h
sp|P13645|K1C10_HUMAN	K.YENEVALR.Q	YENEVALR	6	1	3	238	245	8	992.492	3h
sp|P13647|K2C5_HUMAN	K.LAELEEALQK.A	LAELEEALQK	5	0.9999	4	432	441	10	1142.62	3h
sp|P13647|K2C5_HUMAN	R.TEAESWYQTK.Y	TEAESWYQTK	5	1	1	355	364	10	1241.56	3h
sp|P13647|K2C5_HUMAN	K.WTLLQEQGTK.T	WTLLQEQGTK	18	1	5	200	209	10	1202.63	3h
sp|P13667|PDIA4_HUMAN	X.QFAPEYEK.X	QFAPEYEK	2	0.9351	1	96	103	8	1010.47	3h
sp|P13667|PDIA4_HUMAN	X.FDVSGYPTIK.X	FDVSGYPTIK	1	0.9768	6	132	141	10	1125.57	3h
sp|P13667|PDIA4_HUMAN	K.DKDPPIPVAK.I	DKDPPIPVAK	1	0.9777	1	110	119	10	1078.6	3h
sp|P13667|PDIA4_HUMAN	X.VDATAETDLAK.X	VDATAETDLAK	1	0.9973	2	235	245	11	1132.56	3h
sp|P13667|PDIA4_HUMAN	K.QLEPVYNSLAK.K	QLEPVYNSLAK	1	0.999	3	560	570	11	1260.67	3h
sp|P13667|PDIA4_HUMAN	K.YALPLVGHR.K	YALPLVGHR	1	0.9991	7	392	400	9	1024.58	3h
sp|P13667|PDIA4_HUMAN	K.FHHTFSTEIAK.F	FHHTFSTEIAK	1	0.9993	2	336	346	11	1316.65	3h
sp|P13667|PDIA4_HUMAN	K.IDATSASVLASR.F	IDATSASVLASR	1	0.9999	3	120	131	12	1189.63	3h
sp|P13667|PDIA4_HUMAN	X.DGDDVIIIGVFK.X	DGDDVIIIGVFK	1	1	6	302	313	12	1289.68	3h
sp|P13667|PDIA4_HUMAN	X.DLGLSESGEDVNAAILDESGKK.X	DLGLSESGEDVNAAILDESGKK	1	1	10	464	485	22	2246.09	3h
sp|P13667|PDIA4_HUMAN	R.EVSQPDWTPPPEVTLVLTK.E	EVSQPDWTPPPEVTLVLTK	1	1	14	166	184	19	2135.11	3h
sp|P13667|PDIA4_HUMAN	K.FAMEPEEFDSDTLR.E	FAMEPEEFDSDTLR	1	1	10	486	499	14	1685.72	3h
sp|P13667|PDIA4_HUMAN	K.GESDPAYQQYQDAANNLR.E	GESDPAYQQYQDAANNLR	1	1	6	314	331	18	2038.9	3h
sp|P13667|PDIA4_HUMAN	K.MDATANDVPSDR.Y	MDATANDVPSDR	1	1	14	583	594	12	1290.55	3h
sp|P13667|PDIA4_HUMAN	R.SHMMDVQGSTQDSAIK.D	SHMMDVQGSTQDSAIK	1	1	1	371	386	16	1733.77	3h
sp|P13667|PDIA4_HUMAN	K.TFDSIVMDPK.K	TFDSIVMDPK	1	1	5	534	543	10	1151.55	3h
sp|P13667|PDIA4_HUMAN	K.VEGFPTIYFAPSGDK.K	VEGFPTIYFAPSGDK	1	1	4	597	611	15	1626.79	3h
sp|P13667|PDIA4_HUMAN	K.YGIVDYMIEQSGPPSK.E	YGIVDYMIEQSGPPSK	1	1	9	273	288	16	1782.85	3h
sp|P13674|P4HA1_HUMAN	K.SAWLSGYENPVVSR.I	SAWLSGYENPVVSR	3	1	1	383	396	14	1563.77	3h
sp|P13693|TCTP_HUMAN	R.DLISHDEMFSDIYK.I	DLISHDEMFSDIYK	3	1	5	6	19	14	1711.77	3h
sp|P13693|TCTP_HUMAN	R.TEGNIDDSLIGGNASAEGPEGEGTESTVITGVDIVMNHHLQETSFTK.E	TEGNIDDSLIGGNASAEGPEGEGTESTVITGVDIVMNHHLQETSFTK	5	1	3	39	85	47	4856.26	3h
sp|P13727|PRG2_HUMAN	R.RFQWVDGSR.W	RFQWVDGSR	2	0.9867	2	171	179	9	1149.57	3h
sp|P13727|PRG2_HUMAN	R.FQWVDGSR.W	FQWVDGSR	2	0.9887	6	172	179	8	993.465	3h
sp|P13727|PRG2_HUMAN	R.GNLVSIHNFNINYR.I	GNLVSIHNFNINYR	2	1	11	131	144	14	1659.85	3h
sp|P13727|PRG2_HUMAN	R.SETSTFETPLGAK.T	SETSTFETPLGAK	2	1	10	21	33	13	1366.66	3h
sp|P13727|PRG2_HUMAN	R.WNFAYWAAHQPWSR.G	WNFAYWAAHQPWSR	2	1	15	180	193	14	1818.84	3h
sp|P13796|PLSL_HUMAN	X.TENLNDDEK.X	TENLNDDEK	2	0.9984	2	571	579	9	1076.46	3h
sp|P13796|PLSL_HUMAN	R.YTLNILEEIGGGQK.V	YTLNILEEIGGGQK	2	0.9984	3	502	515	14	1533.8	3h
sp|P13796|PLSL_HUMAN	K.LSPEELLLR.W	LSPEELLLR	6	0.9992	10	264	272	9	1068.62	3h
sp|P13796|PLSL_HUMAN	X.AACLPLPGYR.X	AACLPLPGYR	3	0.9998	4	40	49	10	1059.55	3h
sp|P13796|PLSL_HUMAN	R.ISFDEFIK.I	ISFDEFIK	2	0.9998	15	69	76	8	997.51	3h
sp|P13796|PLSL_HUMAN	K.AYYHLLEQVAPK.G	AYYHLLEQVAPK	1	1	8	298	309	12	1430.75	3h
sp|P13796|PLSL_HUMAN	R.EGESLEDLMK.L	EGESLEDLMK	1	1	4	254	263	10	1149.52	3h
sp|P13796|PLSL_HUMAN	X.EGKPYLVLGLLWQVIK.X	EGKPYLVLGLLWQVIK	2	1	13	218	233	16	1855.09	3h
sp|P13796|PLSL_HUMAN	R.EITENLMATGDLDQDGR.I	EITENLMATGDLDQDGR	2	1	14	52	68	17	1876.85	3h
sp|P13796|PLSL_HUMAN	K.FSLVGIGGQDLNEGNR.T	FSLVGIGGQDLNEGNR	2	1	9	473	488	16	1674.83	3h
sp|P13796|PLSL_HUMAN	K.GDEEGVPAVVIDMSGLR.E	GDEEGVPAVVIDMSGLR	1	1	14	310	326	17	1742.85	3h
sp|P13796|PLSL_HUMAN	R.GSVSDEEMMELR.E	GSVSDEEMMELR	3	1	7	4	15	12	1381.58	3h
sp|P13796|PLSL_HUMAN	K.IGLFADIELSR.N	IGLFADIELSR	5	1	24	234	244	11	1232.67	3h
sp|P13796|PLSL_HUMAN	K.IGNFSTDIK.D	IGNFSTDIK	1	1	13	286	294	9	993.511	3h
sp|P13796|PLSL_HUMAN	X.IGNFSTDIKDSK.X	IGNFSTDIKDSK	1	1	2	286	297	12	1323.66	3h
sp|P13796|PLSL_HUMAN	X.IKVPVDWNR.X	IKVPVDWNR	1	1	15	433	441	9	1125.63	3h
sp|P13796|PLSL_HUMAN	K.ISTSLPVLDLIDAIQPGSINYDLLK.T	ISTSLPVLDLIDAIQPGSINYDLLK	2	1	23	546	570	25	2697.48	3h
sp|P13796|PLSL_HUMAN	K.LNLAFIANLFNR.Y	LNLAFIANLFNR	1	1	23	362	373	12	1404.79	3h
sp|P13796|PLSL_HUMAN	X.MINLSVPDTIDER.X	MINLSVPDTIDER	5	1	8	166	178	13	1501.74	3h
sp|P13796|PLSL_HUMAN	K.MVMTVFACLMGK.G	MVMTVFACLMGK	3	1	6	611	622	12	1329.63	3h
sp|P13796|PLSL_HUMAN	R.NEALIALLR.E	NEALIALLR	1	1	12	245	253	9	1011.61	3h
sp|P13796|PLSL_HUMAN	R.NWMNSLGVNPR.V	NWMNSLGVNPR	1	1	6	402	412	11	1286.62	3h
sp|P13796|PLSL_HUMAN	R.QFVTATDVVR.G	QFVTATDVVR	1	1	16	348	357	10	1134.6	3h
sp|P13796|PLSL_HUMAN	K.TENLNDDEKLNNAK.Y	TENLNDDEKLNNAK	2	1	23	571	584	14	1616.76	3h
sp|P13796|PLSL_HUMAN	R.TLTLALIWQLMR.R	TLTLALIWQLMR	2	1	40	489	500	12	1457.84	3h
sp|P13796|PLSL_HUMAN	K.VDTDGNGYISFNELNDLFK.A	VDTDGNGYISFNELNDLFK	3	1	15	21	39	19	2160	3h
sp|P13796|PLSL_HUMAN	K.VNDDIIVNWVNETLR.E	VNDDIIVNWVNETLR	2	1	16	516	530	15	1798.92	3h
sp|P13796|PLSL_HUMAN	R.VNHLYSDLSDALVIFQLYEK.I	VNHLYSDLSDALVIFQLYEK	1	1	30	413	432	20	2366.21	3h
sp|P13796|PLSL_HUMAN	R.VYALPEDLVEVNPK.M	VYALPEDLVEVNPK	2	1	15	597	610	14	1584.84	3h
sp|P13796|PLSL_HUMAN	K.YAFVNWINK.A	YAFVNWINK	5	1	10	124	132	9	1153.59	3h
sp|P13796|PLSL_HUMAN	R.YPALHKPENQDIDWGALEGETR.E	YPALHKPENQDIDWGALEGETR	1	1	19	374	395	22	2538.21	3h
sp|P13798|ACPH_HUMAN	X.SFNLSALEK.X	SFNLSALEK	3	0.9588	1	132	140	9	1007.53	3h
sp|P13798|ACPH_HUMAN	K.VGFLPSAGK.E	VGFLPSAGK	2	0.9992	6	435	443	9	874.488	3h
sp|P13798|ACPH_HUMAN	K.ALDVSASDDEIAR.L	ALDVSASDDEIAR	3	1	4	181	193	13	1360.65	3h
sp|P13798|ACPH_HUMAN	K.MGFAVLLVNYR.G	MGFAVLLVNYR	2	1	2	528	538	11	1281.69	3h
sp|P13798|ACPH_HUMAN	K.TPLLLMLGQEDR.R	TPLLLMLGQEDR	2	1	10	665	676	12	1384.74	3h
sp|P13804|ETFA_HUMAN	X.LLYDLADQLHAAVGASR.X	LLYDLADQLHAAVGASR	3	0.9844	5	233	249	17	1811.95	3h
sp|P13804|ETFA_HUMAN	X.GTSFDAAATSGGSASSEK.X	GTSFDAAATSGGSASSEK	3	0.9992	1	170	187	18	1629.71	3h
sp|P13804|ETFA_HUMAN	R.AAVDAGFVPNDMQVGQTGK.I	AAVDAGFVPNDMQVGQTGK	3	1	10	250	268	19	1903.91	3h
sp|P13804|ETFA_HUMAN	K.ASSTSPVEISEWLDQK.L	ASSTSPVEISEWLDQK	3	1	4	188	203	16	1775.86	3h
sp|P13804|ETFA_HUMAN	K.DPEAPIFQVADYGIVADLFK.V	DPEAPIFQVADYGIVADLFK	3	1	10	302	321	20	2207.11	3h
sp|P13804|ETFA_HUMAN	K.IVAPELYIAVGISGAIQHLAGMK.D	IVAPELYIAVGISGAIQHLAGMK	3	1	14	269	291	23	2350.3	3h
sp|P13804|ETFA_HUMAN	K.LEVAPISDIIAIK.S	LEVAPISDIIAIK	3	1	10	127	139	13	1380.82	3h
sp|P13804|ETFA_HUMAN	K.TIVAINKDPEAPIFQVADYGIVADLFK.V	TIVAINKDPEAPIFQVADYGIVADLFK	3	1	8	295	321	27	2946.57	3h
sp|P13929|ENOB_HUMAN	X.VNQIGSVTESIQACK.X	VNQIGSVTESIQACK	3	1	8	344	358	15	1575.79	3h
sp|P13995|MTDC_HUMAN	R.AAAVVGINSETIMKPASISEEELLNLINK.L	AAAVVGINSETIMKPASISEEELLNLINK	1	1	1	91	119	29	3053.63	3h
sp|P13995|MTDC_HUMAN	K.HTILADIVISAAGIPNLITADMIK.E	HTILADIVISAAGIPNLITADMIK	3	1	9	243	266	24	2489.39	3h
sp|P14174|MIF_HUMAN	X.PMFIVNTNVPR.X	PMFIVNTNVPR	1	0.9988	23	2	12	11	1286.68	3h
sp|P14174|MIF_HUMAN	R.VYINYYDMNAANVGWNNSTFA.-	VYINYYDMNAANVGWNNSTFA	1	0.9992	3	95	115	21	2426.06	3h
sp|P14174|MIF_HUMAN	K.LLCGLLAER.L	LLCGLLAER	1	1	6	79	87	9	986.557	3h
sp|P14314|GLU2B_HUMAN	X.SLKDMEESIR.X	SLKDMEESIR	3	0.9833	3	383	392	10	1206.59	3h
sp|P14314|GLU2B_HUMAN	K.LWEEQLAAAK.A	LWEEQLAAAK	3	0.9991	4	197	206	10	1157.61	3h
sp|P14314|GLU2B_HUMAN	K.AQQEQELAADAFK.E	AQQEQELAADAFK	3	1	11	207	219	13	1447.69	3h
sp|P14314|GLU2B_HUMAN	R.ESLQQMAEVTR.E	ESLQQMAEVTR	3	1	8	125	135	11	1290.62	3h
sp|P14314|GLU2B_HUMAN	K.ETMVTSTTEPSR.C	ETMVTSTTEPSR	3	1	13	488	499	12	1337.61	3h
sp|P14314|GLU2B_HUMAN	K.LGGSPTSLGTWGSWIGPDHDK.F	LGGSPTSLGTWGSWIGPDHDK	3	1	1	439	459	21	2167.03	3h
sp|P14314|GLU2B_HUMAN	K.LGGSPTSLGTWGSWIGPDHDKFSAMK.Y	LGGSPTSLGTWGSWIGPDHDKFSAMK	3	1	2	439	464	26	2731.3	3h
sp|P14314|GLU2B_HUMAN	K.MPPYDEQTQAFIDAAQEAR.N	MPPYDEQTQAFIDAAQEAR	3	1	6	356	374	19	2179.99	3h
sp|P14314|GLU2B_HUMAN	K.SLEDQVEMLR.T	SLEDQVEMLR	3	1	14	168	177	10	1218.59	3h
sp|P14317|HCLS1_HUMAN	X.GFGGQYGIQK.X	GFGGQYGIQK	2	0.9966	1	193	202	10	1053.52	3h
sp|P14317|HCLS1_HUMAN	X.TEHINIHQLR.X	TEHINIHQLR	3	0.9988	6	49	58	10	1259.67	3h
sp|P14317|HCLS1_HUMAN	R.EHPVPLLPIR.Q	EHPVPLLPIR	2	1	2	322	331	10	1169.69	3h
sp|P14317|HCLS1_HUMAN	X.KISSEAWPPVGTPPSSESEPVR.X	KISSEAWPPVGTPPSSESEPVR	2	1	4	297	318	22	2336.16	3h
sp|P14317|HCLS1_HUMAN	K.RSPEAPQPVIAMEEPAVPAPLPK.K	RSPEAPQPVIAMEEPAVPAPLPK	2	1	2	274	296	23	2423.29	3h
sp|P14317|HCLS1_HUMAN	K.SAVGFNEMEAPTTAYK.K	SAVGFNEMEAPTTAYK	2	1	3	208	223	16	1714.79	3h
sp|P14317|HCLS1_HUMAN	K.SAVGHEYVAEVEK.H	SAVGHEYVAEVEK	3	1	2	97	109	13	1416.69	3h
sp|P14324|FPPS_HUMAN	K.QDFVQHFSQIVR.V	QDFVQHFSQIVR	2	0.999	14	81	92	12	1502.76	3h
sp|P14324|FPPS_HUMAN	K.TAFYSFYLPIAAAMYMAGIDGEK.E	TAFYSFYLPIAAAMYMAGIDGEK	2	1	8	267	289	23	2529.19	3h
sp|P14324|FPPS_HUMAN	R.VLTEDEMGHPEIGDAIAR.L	VLTEDEMGHPEIGDAIAR	2	1	12	93	110	18	1951.93	3h
sp|P14550|AK1A1_HUMAN	R.DPDEPVLLEEPVVLALAEK.Y	DPDEPVLLEEPVVLALAEK	1	1	1	222	240	19	2075.1	3h
sp|P14618|KPYM_HUMAN	X.GDVVIVLTGWR.X	GDVVIVLTGWR	5	0.9037	1	506	516	11	1213.68	3h
sp|P14618|KPYM_HUMAN	K.KGVNLPGAAVDLPAVSEKDIQDLK.F	KGVNLPGAAVDLPAVSEKDIQDLK	5	0.9462	1	207	230	24	2476.35	3h
[truncated: 5,659 more rows]

## Sheet: 24h 3bio
protein	peptide_w_cleav	peptide	multiple_proteins	max_ID_probability	number_spectra	start	stop	length	MImass	condition
contam_gi|105815|pir||A34720	X.NKYEDEINK.X	NKYEDEINK	29	0.9965	1	177	185	9	1151.54	24h
contam_gi|105815|pir||A34720	X.LALDIEIATYR.X	LALDIEIATYR	21	0.9997	1	382	392	11	1276.7	24h
contam_gi|106849|pir||PC1102	X.VLDELTLTK.X	VLDELTLTK	5	0.9907	3	62	70	9	1030.59	24h
contam_gi|106849|pir||PC1102	X.IRLENEIQTYR.X	IRLENEIQTYR	6	0.9923	3	244	254	11	1433.76	24h
contam_gi|106849|pir||PC1102	X.LKYENEVALR.X	LKYENEVALR	6	0.9984	1	40	49	10	1233.67	24h
contam_gi|106849|pir||PC1102	X.NVQALEIELQSQLALK.X	NVQALEIELQSQLALK	5	0.9989	1	175	190	16	1796	24h
contam_gi|106849|pir||PC1102	X.NQILNLTTDNANILLQIDNAR.X	NQILNLTTDNANILLQIDNAR	6	1	7	12	32	21	2366.26	24h
contam_gi|1070608|pir||KRHU9	X.LEQEIATYR.X	LEQEIATYR	27	0.9998	3	373	381	9	1121.57	24h
contam_gi|1082558|pir||S41161	X.QVLDNLTMEK.X	QVLDNLTMEK	4	0.9878	2	262	271	10	1189.6	24h
contam_gi|1082558|pir||S41161	X.DQIVDLTVGNNKTLLDIDNTR.X	DQIVDLTVGNNKTLLDIDNTR	4	0.9895	5	213	233	21	2356.22	24h
contam_gi|1082558|pir||S41161	X.FEMEQNLR.X	FEMEQNLR	4	0.9974	3	243	250	8	1065.49	24h
contam_gi|1082558|pir||S41161	X.HGVQELEIELQSQLSK.X	HGVQELEIELQSQLSK	3	1	4	375	390	16	1836.96	24h
contam_gi|1082558|pir||S41161	X.NYSPYYNTIDDLKDQIVDLTVGNNK.X	NYSPYYNTIDDLKDQIVDLTVGNNK	4	1	12	200	224	25	2901.4	24h
contam_gi|1082558|pir||S41161	X.SGGGGGGGLGSGGSIR.X	SGGGGGGGLGSGGSIR	2	1	8	14	29	16	1231.59	24h
contam_gi|1082558|pir||S41161	X.VQALEEANNDLENK.X	VQALEEANNDLENK	4	1	3	171	184	14	1585.76	24h
contam_gi|125080|sp|P02533|K1CN_HUMAN	X.NHEEEMNALR.X	NHEEEMNALR	4	0.9585	1	252	261	10	1241.55	24h
contam_gi|1346342|sp|P08779|K1CX_HUMAN	X.DAETWFLSK.X	DAETWFLSK	5	0.9899	1	301	309	9	1095.52	24h
contam_gi|1346343|sp|P04264|K2C1_HUMAN	X.IEISELNR.X	IEISELNR	7	0.9858	3	396	403	8	972.524	24h
contam_gi|1346343|sp|P04264|K2C1_HUMAN	X.AEAESLYQSK.X	AEAESLYQSK	4	1	4	367	376	10	1124.53	24h
contam_gi|1346343|sp|P04264|K2C1_HUMAN	X.FLEQQNQVLQTK.X	FLEQQNQVLQTK	7	1	15	200	211	12	1474.78	24h
contam_gi|1346343|sp|P04264|K2C1_HUMAN	X.GSGGGSSGGSIGGR.X	GSGGGSSGGSIGGR	2	1	5	603	616	14	1091.49	24h
contam_gi|1346343|sp|P04264|K2C1_HUMAN	X.GSYGSGGSSYGSGGGSYGSGGGGGGHGSYGSGSSSGGYR.X	GSYGSGGSSYGSGGGSYGSGGGGGGHGSYGSGSSSGGYR	2	1	4	550	588	39	3311.29	24h
contam_gi|1346343|sp|P04264|K2C1_HUMAN	X.LNDLEDALQQAK.X	LNDLEDALQQAK	3	1	7	444	455	12	1356.69	24h
contam_gi|1346343|sp|P04264|K2C1_HUMAN	X.MSGECAPNVSVSVSTSHTTISGGGSR.X	MSGECAPNVSVSVSTSHTTISGGGSR	2	1	7	493	518	26	2507.14	24h
contam_gi|1346343|sp|P04264|K2C1_HUMAN	X.NMQDMVEDYR.X	NMQDMVEDYR	4	1	1	258	267	10	1299.52	24h
contam_gi|1346343|sp|P04264|K2C1_HUMAN	X.SLDLDSIIAEVK.X	SLDLDSIIAEVK	2	1	1	344	355	12	1301.71	24h
contam_gi|1346343|sp|P04264|K2C1_HUMAN	X.TNAENEFVTIKK.X	TNAENEFVTIKK	4	1	10	278	289	12	1392.72	24h
contam_gi|1346344|sp|P02538|K2CA_HUMAN	X.ADTLTDEINFLR.X	ADTLTDEINFLR	14	0.9991	2	288	299	12	1406.7	24h
contam_gi|1346344|sp|P02538|K2CA_HUMAN	X.AQYEEIAQR.X	AQYEEIAQR	22	1	5	339	347	9	1106.54	24h
contam_gi|254622|bbs|112352	X.VLYDAEISQIHQSVTDTNVILSMDNSR.X	VLYDAEISQIHQSVTDTNVILSMDNSR	3	1	5	321	347	27	3047.49	24h
sp|A0AVT1|UBA6_HUMAN	K.TVFFESLER.Q	TVFFESLER	1	0.9757	1	296	304	9	1126.57	24h
sp|A0AVT1|UBA6_HUMAN	R.NAIFQLEK.A	NAIFQLEK	1	0.9898	1	823	830	8	961.522	24h
sp|A0FGR8|ESYT2_HUMAN	R.LLDEWFTLDEVPK.G	LLDEWFTLDEVPK	2	1	2	484	496	13	1603.81	24h
sp|A0FGR8|ESYT2_HUMAN	K.VLVALASEELAK.G	VLVALASEELAK	2	1	1	891	902	12	1241.72	24h
sp|A5A3E0|POTEF_HUMAN	X.AVFPSIVGRPR.X	AVFPSIVGRPR	24	0.9989	26	729	739	11	1197.7	24h
sp|A5A3E0|POTEF_HUMAN	X.AGFAGDDAPR.X	AGFAGDDAPR	25	1	44	719	728	10	975.439	24h
sp|A5A3E0|POTEF_HUMAN	X.IWHHTFYNELR.X	IWHHTFYNELR	17	1	47	785	795	11	1514.74	24h
sp|A5A3E0|POTEF_HUMAN	X.SYELPDGQVITIGNER.X	SYELPDGQVITIGNER	17	1	69	939	954	16	1789.88	24h
sp|A5YKK6|CNOT1_HUMAN	X.SLDLIESLLR.X	SLDLIESLLR	1	0.9897	2	450	459	10	1157.66	24h
sp|A6NEC2|PSAL_HUMAN	R.VALSNMNVIDR.K	VALSNMNVIDR	5	1	3	211	221	11	1230.64	24h
sp|A6NHG4|DDTL_HUMAN	X.PFLELDTNLPANR.X	PFLELDTNLPANR	5	1	2	2	14	13	1498.78	24h
sp|A6NHL2|TBAL3_HUMAN	X.LDHKFDLMYAK.X	LDHKFDLMYAK	12	1	6	398	408	11	1379.69	24h
sp|A6NHR9|SMHD1_HUMAN	X.LTFMDLELK.X	LTFMDLELK	1	0.9817	1	526	534	9	1108.58	24h
sp|A6NHR9|SMHD1_HUMAN	K.LYFKPIGDPVFAR.D	LYFKPIGDPVFAR	1	0.9988	2	1799	1811	13	1521.83	24h
sp|A6NHR9|SMHD1_HUMAN	X.LLLIDWPELK.X	LLLIDWPELK	1	0.9993	10	1257	1266	10	1238.73	24h
sp|A6NHR9|SMHD1_HUMAN	K.FSFGLLDLPFR.V	FSFGLLDLPFR	1	1	15	826	836	11	1310.7	24h
sp|A6NI72|NCF1B_HUMAN	X.EMFPIEAGAINPENR.X	EMFPIEAGAINPENR	4	0.9981	2	57	71	15	1686.8	24h
sp|A6NI72|NCF1B_HUMAN	K.KPETYLMPK.D	KPETYLMPK	4	0.9991	6	136	144	9	1105.58	24h
sp|A6NI72|NCF1B_HUMAN	X.PGPQSPGSPLEEER.X	PGPQSPGSPLEEER	3	0.9999	12	342	355	14	1478.7	24h
sp|A6NI72|NCF1B_HUMAN	K.AYTAVEGDEVSLLEGEAVEVIHK.L	AYTAVEGDEVSLLEGEAVEVIHK	4	1	15	237	259	23	2457.22	24h
sp|A6NI72|NCF1B_HUMAN	R.HIALLGFEK.R	HIALLGFEK	3	1	14	8	16	9	1026.58	24h
sp|A6NIZ1|RP1BL_HUMAN	X.VKDTDDVPMILVGNK.X	VKDTDDVPMILVGNK	4	1	27	103	117	15	1642.86	24h
sp|A6NK07|IF2BL_HUMAN	K.DASDDLDDLNFFNQK.K	DASDDLDDLNFFNQK	3	1	1	65	79	15	1755.76	24h
sp|A6NK07|IF2BL_HUMAN	R.EKNPDMVAGEK.R	EKNPDMVAGEK	3	1	2	183	193	11	1216.57	24h
sp|A6NKZ8|YI016_HUMAN	X.IREEYPDR.X	IREEYPDR	14	0.9974	3	83	90	8	1076.53	24h
sp|A6NKZ8|YI016_HUMAN	X.KLAVNMVPFPR.X	KLAVNMVPFPR	22	1	1	180	190	11	1270.72	24h
sp|A6NKZ8|YI016_HUMAN	X.LHFFMPGFAPLTSR.X	LHFFMPGFAPLTSR	19	1	27	191	204	14	1619.83	24h
sp|A6NL28|TPM3L_HUMAN	X.IQVLQQQADDAEERAER.X	IQVLQQQADDAEERAER	8	1	4	14	30	17	1997.98	24h
sp|A8MW06|TMSL3_HUMAN	K.ETIEQEKQAGES.-	ETIEQEKQAGES	4	1	5	33	44	12	1347.62	24h
sp|A8MW06|TMSL3_HUMAN	K.KTETQEKNPLPSK.E	KTETQEKNPLPSK	4	1	18	20	32	13	1498.8	24h
sp|A8MW06|TMSL3_HUMAN	K.NPLPSKETIEQEK.Q	NPLPSKETIEQEK	5	1	10	27	39	13	1511.78	24h
sp|A8MW06|TMSL3_HUMAN	K.NPLPSKETIEQEKQAGES.-	NPLPSKETIEQEKQAGES	4	1	5	27	44	18	1983.97	24h
sp|A8MW06|TMSL3_HUMAN	K.TETQEKNPLPSK.E	TETQEKNPLPSK	4	1	31	21	32	12	1370.7	24h
sp|A8MW06|TMSL3_HUMAN	K.TETQEKNPLPSKETIEQEK.Q	TETQEKNPLPSKETIEQEK	4	1	18	21	39	19	2228.12	24h
sp|A8MWD9|RUXGL_HUMAN	R.GNSIIMLEALER.V	GNSIIMLEALER	4	0.9945	1	64	75	12	1344.71	24h
sp|B0I1T2|MYO1G_HUMAN	R.AMWPDGQQDITEVTK.R	AMWPDGQQDITEVTK	1	1	1	557	571	15	1717.8	24h
sp|B0I1T2|MYO1G_HUMAN	K.EGLAVAEEALVDHVAELTATPR.D	EGLAVAEEALVDHVAELTATPR	1	1	10	298	319	22	2290.18	24h
sp|B2RPK0|HGB1A_HUMAN	X.FKDPNAPK.X	FKDPNAPK	7	0.9102	3	89	96	8	915.479	24h
sp|B2RPK0|HGB1A_HUMAN	X.GEHPGLSIGDVAK.X	GEHPGLSIGDVAK	5	1	13	115	127	13	1278.65	24h
sp|B2RPK0|HGB1A_HUMAN	X.IKGEHPGLSIGDVAK.X	IKGEHPGLSIGDVAK	5	1	25	113	127	15	1519.83	24h
sp|O00116|ADAS_HUMAN	K.ESISDVGFGMLK.S	ESISDVGFGMLK	2	0.9992	1	629	640	12	1281.62	24h
sp|O00116|ADAS_HUMAN	K.NIYGNIEDLVVHIK.M	NIYGNIEDLVVHIK	1	1	2	324	337	14	1625.88	24h
sp|O00116|ADAS_HUMAN	R.TIISLDTSQMNR.I	TIISLDTSQMNR	1	1	1	254	265	12	1377.69	24h
sp|O00148|DX39A_HUMAN	X.RDVQEIFR.X	RDVQEIFR	30	0.9909	1	208	215	8	1061.56	24h
sp|O00148|DX39A_HUMAN	K.GLAITFVSDENDAK.I	GLAITFVSDENDAK	3	0.9985	1	384	397	14	1478.72	24h
sp|O00148|DX39A_HUMAN	X.DFLLKPELLR.X	DFLLKPELLR	30	0.9992	14	48	57	10	1242.73	24h
sp|O00148|DX39A_HUMAN	R.FEVNVAELPEEIDISTYIEQSR.-	FEVNVAELPEEIDISTYIEQSR	1	1	3	406	427	22	2580.26	24h
sp|O00148|DX39A_HUMAN	K.FMQDPMEVFVDDETK.L	FMQDPMEVFVDDETK	2	1	3	241	255	15	1829.78	24h
sp|O00148|DX39A_HUMAN	K.GSYVSIHSSGFR.D	GSYVSIHSSGFR	73	1	7	36	47	12	1295.62	24h
sp|O00148|DX39A_HUMAN	X.LTLHGLQQYYVK.X	LTLHGLQQYYVK	21	1	6	256	267	12	1461.8	24h
sp|O00148|DX39A_HUMAN	K.MLEQLDMR.R	MLEQLDMR	42	1	9	200	207	8	1034.49	24h
sp|O00148|DX39A_HUMAN	X.VNIVFNYDMPEDSDTYLHR.X	VNIVFNYDMPEDSDTYLHR	1	1	2	355	373	19	2327.05	24h
sp|O00182|LEG9_HUMAN	R.FDENAVVR.N	FDENAVVR	6	0.9992	4	272	279	8	948.465	24h
sp|O00182|LEG9_HUMAN	X.NTQIDNSWGSEER.X	NTQIDNSWGSEER	3	1	9	280	292	13	1534.66	24h
sp|O00186|STXB3_HUMAN	K.MTDLLEEGITVVENIYK.N	MTDLLEEGITVVENIYK	1	0.9899	1	51	67	17	1965.99	24h
sp|O00193|SMAP_HUMAN	K.INEELESQYQQSMDSK.L	INEELESQYQQSMDSK	4	1	10	76	91	16	1927.85	24h
sp|O00203|AP3B1_HUMAN	X.LLDSITVPVAR.X	LLDSITVPVAR	2	0.9875	1	486	496	11	1182.7	24h
sp|O00231|PSD11_HUMAN	R.AQSLLSTDR.E	AQSLLSTDR	1	0.9507	1	12	20	9	989.514	24h
sp|O00231|PSD11_HUMAN	R.VQIEHISSLIK.L	VQIEHISSLIK	1	0.9748	2	345	355	11	1265.73	24h
sp|O00231|PSD11_HUMAN	X.LVSLYFDTK.X	LVSLYFDTK	1	0.975	1	133	141	9	1084.58	24h
sp|O00231|PSD11_HUMAN	K.EQSILELGSLLAK.T	EQSILELGSLLAK	1	1	15	47	59	13	1399.79	24h
sp|O00231|PSD11_HUMAN	K.IMLNTPEDVQALVSGK.L	IMLNTPEDVQALVSGK	1	1	2	259	274	16	1713.89	24h
sp|O00231|PSD11_HUMAN	X.LYDNLLEQNLIR.X	LYDNLLEQNLIR	1	1	4	326	337	12	1502.81	24h
sp|O00232|PSD12_HUMAN	R.LQEVIETLLSLEK.Q	LQEVIETLLSLEK	1	1	14	40	52	13	1513.86	24h
sp|O00244|ATOX1_HUMAN	K.YDIDLPNKK.V	YDIDLPNKK	3	1	7	31	39	9	1104.58	24h
sp|O00273|DFFA_HUMAN	K.AAFGEEVDAVDTGISR.E	AAFGEEVDAVDTGISR	2	1	2	214	229	16	1635.77	24h
sp|O00299|CLIC1_HUMAN	X.GFTIPEAFR.X	GFTIPEAFR	2	0.9959	8	196	204	9	1036.53	24h
sp|O00299|CLIC1_HUMAN	K.GVTFNVTTVDTK.R	GVTFNVTTVDTK	2	1	5	38	49	12	1280.66	24h
sp|O00299|CLIC1_HUMAN	K.LAALNPESNTAGLDIFAK.F	LAALNPESNTAGLDIFAK	2	1	15	96	113	18	1843.97	24h
sp|O00299|CLIC1_HUMAN	R.LFMVLWLK.G	LFMVLWLK	2	1	16	30	37	8	1048.61	24h
sp|O00299|CLIC1_HUMAN	K.NSNPALNDNLEK.G	NSNPALNDNLEK	2	1	14	120	131	12	1327.64	24h
sp|O00299|CLIC1_HUMAN	K.VLDNYLTSPLPEEVDETSAEDEGVSQR.K	VLDNYLTSPLPEEVDETSAEDEGVSQR	2	1	14	139	165	27	2991.38	24h
sp|O00299|CLIC1_HUMAN	K.VLDNYLTSPLPEEVDETSAEDEGVSQRK.F	VLDNYLTSPLPEEVDETSAEDEGVSQRK	2	1	1	139	166	28	3119.48	24h
sp|O00299|CLIC1_HUMAN	R.YLSNAYAR.E	YLSNAYAR	2	1	10	209	216	8	956.47	24h
sp|O00303|EIF3F_HUMAN	K.VSADNTVGR.F	VSADNTVGR	2	0.9751	1	298	306	9	917.455	24h
sp|O00303|EIF3F_HUMAN	K.YAYYDTER.I	YAYYDTER	2	0.9969	2	239	246	8	1079.45	24h
sp|O00303|EIF3F_HUMAN	K.AYVSTLMGVPGR.T	AYVSTLMGVPGR	2	1	4	215	226	12	1249.65	24h
sp|O00303|EIF3F_HUMAN	R.FLMSLVNQVPK.I	FLMSLVNQVPK	2	1	2	307	317	11	1274.7	24h
sp|O00303|EIF3F_HUMAN	R.IQDALSTVLQYAEDVLSGK.V	IQDALSTVLQYAEDVLSGK	2	1	28	279	297	19	2049.06	24h
sp|O00303|EIF3F_HUMAN	R.LHPVILASIVDSYER.R	LHPVILASIVDSYER	3	1	7	94	108	15	1710.93	24h
sp|O00303|EIF3F_HUMAN	R.TMGVMFTPLTVK.Y	TMGVMFTPLTVK	2	1	14	227	238	12	1323.69	24h
sp|O00303|EIF3F_HUMAN	R.VIGLSSDLQQVGGASAR.I	VIGLSSDLQQVGGASAR	2	1	2	262	278	17	1656.88	24h
sp|O00391|QSOX1_HUMAN	X.IYMADLESALHYILR.X	IYMADLESALHYILR	2	1	10	299	313	15	1806.93	24h
sp|O00391|QSOX1_HUMAN	R.LDVPVWDVEATLNFLK.A	LDVPVWDVEATLNFLK	2	1	5	517	532	16	1857.98	24h
sp|O00410|IPO5_HUMAN	X.SLLIPYLDNLVK.X	SLLIPYLDNLVK	1	0.9991	7	476	487	12	1386.81	24h
sp|O00410|IPO5_HUMAN	X.ITFLLQAIR.X	ITFLLQAIR	13	0.9999	11	42	50	9	1073.66	24h
sp|O00410|IPO5_HUMAN	K.AIGTEPDSDVLSEIMHSFAK.C	AIGTEPDSDVLSEIMHSFAK	1	1	15	756	775	20	2146.02	24h
sp|O00410|IPO5_HUMAN	R.ATAAFILANEHNVALFK.H	ATAAFILANEHNVALFK	1	1	9	196	212	17	1828.98	24h
sp|O00410|IPO5_HUMAN	K.FLFDSVSSQNVGLR.E	FLFDSVSSQNVGLR	4	1	7	135	148	14	1567.8	24h
sp|O00410|IPO5_HUMAN	K.FMQDASDVMQLLLK.T	FMQDASDVMQLLLK	1	1	4	573	586	14	1637.81	24h
sp|O00410|IPO5_HUMAN	K.HIVENAVQK.E	HIVENAVQK	1	1	6	540	548	9	1036.57	24h
sp|O00410|IPO5_HUMAN	K.LVLEQVVTSIASVADTAEEK.F	LVLEQVVTSIASVADTAEEK	1	1	7	507	526	20	2101.11	24h
sp|O00410|IPO5_HUMAN	X.NLIDEDGNNQWPEGLK.X	NLIDEDGNNQWPEGLK	5	1	8	119	134	16	1840.86	24h
sp|O00410|IPO5_HUMAN	X.QLALEVIVTLSETAAAMLR.X	QLALEVIVTLSETAAAMLR	1	1	4	277	295	19	2028.13	24h
sp|O00410|IPO5_HUMAN	K.VIAALLQTMEDQGNQR.V	VIAALLQTMEDQGNQR	1	1	4	442	457	16	1785.9	24h
sp|O00410|IPO5_HUMAN	K.VSDILHSIFSSYK.E	VSDILHSIFSSYK	1	1	15	842	854	13	1494.77	24h
sp|O00422|SAP18_HUMAN	R.GNVPSSELQIYTWMDATLK.E	GNVPSSELQIYTWMDATLK	1	1	1	49	67	19	2152.05	24h
sp|O00422|SAP18_HUMAN	K.GTHFNFAIVFTDVK.R	GTHFNFAIVFTDVK	1	1	3	84	97	14	1594.81	24h
sp|O00423|EMAL1_HUMAN	R.TGSTSSSSSGKK.N	TGSTSSSSSGKK	1	0.9646	5	158	169	12	1112.53	24h
sp|O00429|DNM1L_HUMAN	K.IFSPNVVNLTLVDLPGMTK.V	IFSPNVVNLTLVDLPGMTK	2	1	1	134	152	19	2057.12	24h
sp|O00429|DNM1L_HUMAN	K.LDLMDAGTDAMDVLMGR.V	LDLMDAGTDAMDVLMGR	2	1	8	217	233	17	1822.82	24h
sp|O00429|DNM1L_HUMAN	R.LPVTNEMVHNLVAIELAYINTK.H	LPVTNEMVHNLVAIELAYINTK	3	1	7	476	497	22	2481.33	24h
sp|O00487|PSDE_HUMAN	R.AGVPMEVMGLMLGEFVDDYTVR.V	AGVPMEVMGLMLGEFVDDYTVR	2	1	8	47	68	22	2428.14	24h
sp|O00487|PSDE_HUMAN	X.AVAVVVDPIQSVK.X	AVAVVVDPIQSVK	1	1	7	140	152	13	1323.77	24h
sp|O00487|PSDE_HUMAN	R.LGGGMPGLGQGPPTDAPAVDTAEQVYISSLALLK.M	LGGGMPGLGQGPPTDAPAVDTAEQVYISSLALLK	2	1	3	7	40	34	3322.71	24h
sp|O00505|IMA3_HUMAN	K.SGILPILVK.C	SGILPILVK	1	0.9928	1	113	121	9	938.614	24h
sp|O00560|SDCB1_HUMAN	X.ANVAVVSGAPLQGQLVAR.X	ANVAVVSGAPLQGQLVAR	2	1	5	68	85	18	1748.99	24h
sp|O00560|SDCB1_HUMAN	X.SIDNGIFVQLVQANSPASLVGLR.X	SIDNGIFVQLVQANSPASLVGLR	3	1	1	131	153	23	2397.3	24h
sp|O00566|MPP10_HUMAN	K.AGDIKTAAEK.T	AGDIKTAAEK	2	0.9524	1	560	569	10	1002.53	24h
sp|O00567|NOP56_HUMAN	K.YPASTVQILGAEK.A	YPASTVQILGAEK	2	0.9857	1	321	333	13	1375.73	24h
sp|O00567|NOP56_HUMAN	X.LLLETHLPSK.X	LLLETHLPSK	2	0.9951	8	78	87	10	1149.67	24h
sp|O00567|NOP56_HUMAN	K.VLLGVGDPK.I	VLLGVGDPK	2	0.9963	2	91	99	9	896.53	24h
sp|O00567|NOP56_HUMAN	X.STPKEETVNDPEEAGHR.X	STPKEETVNDPEEAGHR	1	0.9999	4	537	553	17	1894.87	24h
sp|O00567|NOP56_HUMAN	R.LSFYETGEIPR.K	LSFYETGEIPR	2	1	3	405	415	11	1310.65	24h
sp|O00567|NOP56_HUMAN	K.MSQVAPSLSALIGEAVGAR.L	MSQVAPSLSALIGEAVGAR	2	1	7	289	307	19	1855.98	24h
sp|O00567|NOP56_HUMAN	R.VDNMIIQSISLLDQLDK.D	VDNMIIQSISLLDQLDK	2	1	3	164	180	17	1944.02	24h
sp|O00567|NOP56_HUMAN	R.VDNMIIQSISLLDQLDKDINTFSMR.V	VDNMIIQSISLLDQLDKDINTFSMR	2	1	6	164	188	25	2908.47	24h
sp|O00571|DDX3X_HUMAN	K.DLLDLLVEAK.Q	DLLDLLVEAK	4	1	15	555	564	10	1127.64	24h
sp|O00571|DDX3X_HUMAN	K.HVINFDLPSDIEEYVHR.I	HVINFDLPSDIEEYVHR	3	1	1	512	528	17	2082.02	24h
sp|O00571|DDX3X_HUMAN	R.SFLLDLLNATGK.D	SFLLDLLNATGK	1	1	15	429	440	12	1290.72	24h
sp|O00571|DDX3X_HUMAN	K.SPILVATAVAAR.G	SPILVATAVAAR	3	1	7	492	503	12	1167.7	24h
sp|O00571|DDX3X_HUMAN	K.TAAFLLPILSQIYSDGPGEALR.A	TAAFLLPILSQIYSDGPGEALR	2	1	10	231	252	22	2331.25	24h
sp|O00584|RNT2_HUMAN	X.SWPFNLEEIKDLLPEMR.X	SWPFNLEEIKDLLPEMR	3	0.9991	13	78	94	17	2116.07	24h
sp|O00584|RNT2_HUMAN	R.ELDLNSVLLK.L	ELDLNSVLLK	4	0.9999	10	144	153	10	1142.65	24h
sp|O00629|IMA4_HUMAN	K.DAQVVQVVLDGLSNILK.M	DAQVVQVVLDGLSNILK	1	1	25	424	440	17	1810.02	24h
sp|O00754|MA2B1_HUMAN	R.VAWHIDPFGHSR.E	VAWHIDPFGHSR	1	0.9888	10	191	202	12	1420.7	24h
sp|O00754|MA2B1_HUMAN	K.NDIQHAGVQYILDSVISALLADPTRR.F	NDIQHAGVQYILDSVISALLADPTRR	1	0.9985	3	90	115	26	2864.51	24h
sp|O00754|MA2B1_HUMAN	K.TVDQYFYGIK.N	TVDQYFYGIK	1	0.999	4	80	89	10	1232.61	24h
sp|O00754|MA2B1_HUMAN	R.FQVIVYNPLGR.K	FQVIVYNPLGR	1	0.9992	2	510	520	11	1304.72	24h
sp|O00754|MA2B1_HUMAN	R.DLPPSVHLLTLASWGPEMVLLR.L	DLPPSVHLLTLASWGPEMVLLR	1	0.9999	4	895	916	22	2443.33	24h
sp|O00754|MA2B1_HUMAN	X.ATFDPDTGLLMEIMNMNQQLLLPVR.X	ATFDPDTGLLMEIMNMNQQLLLPVR	1	1	4	614	638	25	2859.43	24h
sp|O00754|MA2B1_HUMAN	R.DGSLELMVHR.R	DGSLELMVHR	1	1	5	806	815	10	1155.57	24h
sp|O00754|MA2B1_HUMAN	R.DLFSTFTITR.L	DLFSTFTITR	1	1	8	941	950	10	1199.62	24h
sp|O00754|MA2B1_HUMAN	R.LPVSEGVFVVK.D	LPVSEGVFVVK	1	1	1	528	538	11	1172.68	24h
sp|O00754|MA2B1_HUMAN	R.LQETTLVANQLR.E	LQETTLVANQLR	1	1	6	951	962	12	1384.77	24h
sp|O00754|MA2B1_HUMAN	X.NDIQHAGVQYILDSVISALLADPTR.X	NDIQHAGVQYILDSVISALLADPTR	1	1	5	90	114	25	2708.41	24h
sp|O00764|PDXK_HUMAN	K.GQVLNSDELQELYEGLR.L	GQVLNSDELQELYEGLR	3	1	1	54	70	17	1961.97	24h
sp|O00764|PDXK_HUMAN	K.SFLAMVVDIVQELK.Q	SFLAMVVDIVQELK	3	1	10	89	102	14	1590.87	24h
sp|O14561|ACPM_HUMAN	X.LYDKIDPEK.X	LYDKIDPEK	1	0.9963	3	89	97	9	1119.58	24h
sp|O14561|ACPM_HUMAN	X.LMCPQEIVDYIADKK.X	LMCPQEIVDYIADKK	1	0.9991	1	138	152	15	1764.88	24h
sp|O14561|ACPM_HUMAN	K.LSVNSHFMK.D	LSVNSHFMK	1	0.9992	3	98	106	9	1061.53	24h
sp|O14579|COPE_HUMAN	K.LQDAYYIFQEMADK.C	LQDAYYIFQEMADK	2	1	4	198	211	14	1733.8	24h
sp|O14579|COPE_HUMAN	R.MQDLDEDATLTQLATAWVSLATGGEK.L	MQDLDEDATLTQLATAWVSLATGGEK	2	1	13	172	197	26	2763.33	24h
sp|O14579|COPE_HUMAN	R.WEAAEGLLQEALDK.D	WEAAEGLLQEALDK	2	1	2	232	245	14	1571.78	24h
sp|O14602|IF1AY_HUMAN	X.DYQDNKADVILK.X	DYQDNKADVILK	2	1	4	83	94	12	1420.72	24h
sp|O14656|TOR1A_HUMAN	R.NLIDYFVPFLPLEYK.H	NLIDYFVPFLPLEYK	3	0.999	2	261	275	15	1869.99	24h
sp|O14732|IMPA2_HUMAN	K.TSAADLVTETDHLVEDLIISELR.E	TSAADLVTETDHLVEDLIISELR	2	1	7	48	70	23	2539.3	24h
sp|O14737|PDCD5_HUMAN	K.HGDPGDAAQQEAK.H	HGDPGDAAQQEAK	3	1	14	21	33	13	1322.58	24h
sp|O14737|PDCD5_HUMAN	R.LSNLALVKPEK.T	LSNLALVKPEK	2	1	3	56	66	11	1210.73	24h
sp|O14737|PDCD5_HUMAN	K.VSEQGLIEILK.K	VSEQGLIEILK	1	1	4	87	97	11	1227.71	24h
sp|O14744|ANM5_HUMAN	R.VPLVAPEDLR.D	VPLVAPEDLR	4	0.9991	1	155	164	10	1107.63	24h
sp|O14744|ANM5_HUMAN	X.GYEDYLQSPLQPLMDNLESQTYEVFEKDPIK.X	GYEDYLQSPLQPLMDNLESQTYEVFEKDPIK	4	1	8	303	333	31	3688.75	24h
sp|O14745|NHRF1_HUMAN	X.RAPQMDWSK.X	RAPQMDWSK	1	0.9955	2	342	350	9	1117.53	24h
sp|O14745|NHRF1_HUMAN	R.LVEPGSPAEK.A	LVEPGSPAEK	1	0.9998	8	41	50	10	1025.54	24h
sp|O14745|NHRF1_HUMAN	X.LVEVNGENVEK.X	LVEVNGENVEK	1	0.9998	9	59	69	11	1228.63	24h
sp|O14745|NHRF1_HUMAN	R.AQEAPGQAEPPAAAEVQGAGNENEPR.E	AQEAPGQAEPPAAAEVQGAGNENEPR	2	1	10	113	138	26	2587.19	24h
sp|O14745|NHRF1_HUMAN	R.LLVVDPETDEQLQK.L	LLVVDPETDEQLQK	2	1	11	88	101	14	1625.85	24h
sp|O14745|NHRF1_HUMAN	R.SVDPDSPAEASGLR.A	SVDPDSPAEASGLR	2	1	7	181	194	14	1399.66	24h
sp|O14773|TPP1_HUMAN	X.PSYQEEAVTK.X	PSYQEEAVTK	5	0.9868	3	419	428	10	1150.55	24h
sp|O14773|TPP1_HUMAN	R.AYPDVAALSDGYWVVSNR.V	AYPDVAALSDGYWVVSNR	5	1	1	448	465	18	1981.95	24h
sp|O14773|TPP1_HUMAN	R.VPIPWVSGTSASTPVFGGILSLINEHR.I	VPIPWVSGTSASTPVFGGILSLINEHR	5	1	14	466	492	27	2833.51	24h
sp|O14776|TCRG1_HUMAN	X.VFFYNPTTR.X	VFFYNPTTR	1	0.9541	1	544	552	9	1143.57	24h
sp|O14787|TNPO2_HUMAN	X.EELLPHLLPLLK.X	EELLPHLLPLLK	3	0.9977	1	389	400	12	1413.86	24h
sp|O14787|TNPO2_HUMAN	K.YSEIDIILLK.G	YSEIDIILLK	3	0.9984	3	308	317	10	1205.69	24h
sp|O14787|TNPO2_HUMAN	R.ATIGILITTIASK.G	ATIGILITTIASK	3	1	4	106	118	13	1300.8	24h
sp|O14818|PSA7_HUMAN	X.ILNPEEIEK.X	ILNPEEIEK	2	0.9964	11	219	227	9	1083.58	24h
sp|O14818|PSA7_HUMAN	X.AITVFSPDGHLFQVEYAQEAVKK.X	AITVFSPDGHLFQVEYAQEAVKK	3	1	4	6	28	23	2576.32	24h
sp|O14818|PSA7_HUMAN	X.LTVEDPVTVEYITR.X	LTVEDPVTVEYITR	4	1	4	96	109	14	1633.86	24h
sp|O14818|PSA7_HUMAN	X.LYQTDPSGTYHAWK.X	LYQTDPSGTYHAWK	3	1	8	144	157	14	1665.78	24h
sp|O14818|PSA7_HUMAN	K.NYTDEAIETDDLTIK.L	NYTDEAIETDDLTIK	2	1	10	175	189	15	1739.81	24h
sp|O14818|PSA7_HUMAN	X.RPFGISALIVGFDFDGTPR.X	RPFGISALIVGFDFDGTPR	2	1	10	125	143	19	2064.08	24h
sp|O14818|PSA7_HUMAN	K.YVAEIEKEKEENEK.K	YVAEIEKEKEENEK	2	1	1	228	241	14	1736.85	24h
sp|O14828|SCAM3_HUMAN	R.TAAANAAAGAAENAFR.A	TAAANAAAGAAENAFR	1	1	8	330	345	16	1475.71	24h
sp|O14920|IKKB_HUMAN	R.EGAILTLLSDIASALR.Y	EGAILTLLSDIASALR	4	1	10	119	134	16	1641.93	24h
sp|O14929|HAT1_HUMAN	R.VSQMLILTPFQGQGHGAQLLETVHR.Y	VSQMLILTPFQGQGHGAQLLETVHR	1	0.9539	1	238	262	25	2759.45	24h
sp|O14929|HAT1_HUMAN	K.LRDFVLVK.L	LRDFVLVK	1	0.9795	1	285	292	8	988.604	24h
sp|O14929|HAT1_HUMAN	R.LLVTDMSDAEQYR.S	LLVTDMSDAEQYR	1	1	4	337	349	13	1539.72	24h
sp|O14929|HAT1_HUMAN	K.LMQGFNEDMAIEAQQK.F	LMQGFNEDMAIEAQQK	1	1	2	305	320	16	1851.85	24h
sp|O14929|HAT1_HUMAN	R.YYTEFPTVLDITAEDPSK.S	YYTEFPTVLDITAEDPSK	1	1	6	263	280	18	2087.99	24h
sp|O14950|ML12B_HUMAN	X.ELLTTMGDRFTDEEVDELYR.X	ELLTTMGDRFTDEEVDELYR	3	0.9881	1	125	144	20	2431.12	24h
sp|O14950|ML12B_HUMAN	X.DGFIDKEDLHDMLASLGK.X	DGFIDKEDLHDMLASLGK	4	1	22	46	63	18	2002.96	24h
sp|O14950|ML12B_HUMAN	X.FTDEEVDELYR.X	FTDEEVDELYR	3	1	7	134	144	11	1414.62	24h
sp|O14950|ML12B_HUMAN	X.LNGTDPEDVIR.X	LNGTDPEDVIR	4	1	12	94	104	11	1227.61	24h
sp|O14974|MYPT1_HUMAN	X.VGQTAFDVADEDILGYLEELQK.X	VGQTAFDVADEDILGYLEELQK	2	0.9917	1	264	285	22	2452.2	24h
sp|O14976|GAK_HUMAN	R.LSIAEVVHQLQEIAAAR.N	LSIAEVVHQLQEIAAAR	2	1	5	304	320	17	1847.03	24h
sp|O14979|HNRDL_HUMAN	K.EYFGAFGEIENIELPMDTK.T	EYFGAFGEIENIELPMDTK	1	1	7	251	269	19	2202.02	24h
sp|O14979|HNRDL_HUMAN	K.MFIGGLSWDTSK.K	MFIGGLSWDTSK	1	1	1	150	161	12	1340.64	24h
sp|O14979|HNRDL_HUMAN	K.MFIGGLSWDTSKK.D	MFIGGLSWDTSKK	1	1	8	150	162	13	1468.73	24h
sp|O14979|HNRDL_HUMAN	K.VFVGGLSPDTSEEQIKEYFGAFGEIENIELPMDTK.T	VFVGGLSPDTSEEQIKEYFGAFGEIENIELPMDTK	1	1	2	235	269	35	3888.86	24h
sp|O14980|XPO1_HUMAN	X.ETLMEALHYMLLVSEVEETEIFK.X	ETLMEALHYMLLVSEVEETEIFK	1	0.9001	1	345	367	23	2753.35	24h
sp|O14980|XPO1_HUMAN	X.DFEEYPEHR.X	DFEEYPEHR	1	0.9895	1	837	845	9	1220.51	24h
sp|O14980|XPO1_HUMAN	R.MAQEVLTHLK.E	MAQEVLTHLK	8	0.999	2	45	54	10	1168.63	24h
sp|O14980|XPO1_HUMAN	R.FLNWIPLGYIFETK.L	FLNWIPLGYIFETK	1	0.9998	1	232	245	14	1739.93	24h
sp|O14980|XPO1_HUMAN	X.AIIASNIMYIVGQYPR.X	AIIASNIMYIVGQYPR	1	1	3	538	553	16	1807.96	24h
sp|O14980|XPO1_HUMAN	K.EFAGEDTSDLFLEER.E	EFAGEDTSDLFLEER	1	1	2	1024	1038	15	1756.78	24h
sp|O14980|XPO1_HUMAN	X.LDINLLDNVVNCLYHGEGAQQR.X	LDINLLDNVVNCLYHGEGAQQR	8	1	1	23	44	22	2483.22	24h
sp|O14980|XPO1_HUMAN	K.LFVTGLFSLNQDIPAFK.E	LFVTGLFSLNQDIPAFK	1	1	13	996	1012	17	1909.03	24h
sp|O14980|XPO1_HUMAN	K.LVLDSIIWAFK.H	LVLDSIIWAFK	1	1	3	873	883	11	1303.75	24h
sp|O14980|XPO1_HUMAN	K.NVDILKDPETVK.Q	NVDILKDPETVK	1	1	2	675	686	12	1369.74	24h
sp|O14980|XPO1_HUMAN	K.YMLLPNQVWDSIIQQATK.N	YMLLPNQVWDSIIQQATK	1	1	13	657	674	18	2147.11	24h
sp|O14980|XPO1_HUMAN	K.YYGLQILENVIK.T	YYGLQILENVIK	6	1	8	77	88	12	1451.8	24h
sp|O14983|AT2A1_HUMAN	X.TASEMVLADDNFSTIVAAVEEGR.X	TASEMVLADDNFSTIVAAVEEGR	3	0.9964	1	729	751	23	2424.15	24h
sp|O15067|PUR4_HUMAN	R.LSFAHPPSAEVEAIALATLHDR.M	LSFAHPPSAEVEAIALATLHDR	1	0.9041	1	127	148	22	2344.22	24h
sp|O15067|PUR4_HUMAN	X.LAVAEALTNLVFALVTDLR.X	LAVAEALTNLVFALVTDLR	1	1	12	742	760	19	2028.16	24h
sp|O15116|LSM1_HUMAN	K.ESDTPLQQVSIEEILEEQR.V	ESDTPLQQVSIEEILEEQR	1	1	1	82	100	19	2242.1	24h
sp|O15131|IMA5_HUMAN	X.IVQVALNGLENILR.X	IVQVALNGLENILR	3	1	1	437	450	14	1550.91	24h
sp|O15143|ARC1B_HUMAN	R.TWKPTLVILR.I	TWKPTLVILR	7	0.9965	4	85	94	10	1225.75	24h
sp|O15143|ARC1B_HUMAN	R.NAYVWTLK.G	NAYVWTLK	8	0.9989	4	75	82	8	993.526	24h
sp|O15143|ARC1B_HUMAN	K.ASSEGGTAAGAGLDSLHK.N	ASSEGGTAAGAGLDSLHK	2	1	15	309	326	18	1627.78	24h
sp|O15143|ARC1B_HUMAN	K.EHNGQVTGIDWAPESNR.I	EHNGQVTGIDWAPESNR	8	1	7	50	66	17	1908.87	24h
sp|O15143|ARC1B_HUMAN	K.NSVSQISVLSGGK.A	NSVSQISVLSGGK	2	1	12	327	339	13	1274.68	24h
sp|O15144|ARPC2_HUMAN	K.DSIVHQAGMLKR.N	DSIVHQAGMLKR	3	0.9988	3	107	118	12	1353.72	24h
sp|O15144|ARPC2_HUMAN	-.MILLEVNNR.I	MILLEVNNR	3	0.9989	1	1	9	9	1100.6	24h
sp|O15144|ARPC2_HUMAN	X.YFQFQEEGK.X	YFQFQEEGK	3	0.9992	3	128	136	9	1174.53	24h
sp|O15144|ARPC2_HUMAN	R.ASHTAPQVLFSHR.E	ASHTAPQVLFSHR	3	1	8	191	203	13	1449.75	24h
sp|O15144|ARPC2_HUMAN	X.DNTINLIHTFR.X	DNTINLIHTFR	2	1	7	238	248	11	1342.7	24h
sp|O15144|ARPC2_HUMAN	K.DSIVHQAGMLK.R	DSIVHQAGMLK	3	1	1	107	117	11	1197.62	24h
sp|O15144|ARPC2_HUMAN	K.DTDAAVGDNIGYITFVLFPR.H	DTDAAVGDNIGYITFVLFPR	2	1	7	211	230	20	2183.09	24h
sp|O15144|ARPC2_HUMAN	R.VYGSFLVNPESGYNVSLLYDLENLPASK.D	VYGSFLVNPESGYNVSLLYDLENLPASK	3	1	15	79	106	28	3087.54	24h
sp|O15145|ARPC3_HUMAN	K.VFDPQNDKPSK.W	VFDPQNDKPSK	1	0.9991	11	148	158	11	1273.63	24h
sp|O15145|ARPC3_HUMAN	X.EMYTLGITNFPIPGEPGFPLNAIYAK.X	EMYTLGITNFPIPGEPGFPLNAIYAK	1	0.9999	6	94	119	26	2852.44	24h
sp|O15145|ARPC3_HUMAN	K.DTDIVDEAIYYFK.A	DTDIVDEAIYYFK	2	1	14	38	50	13	1590.74	24h
sp|O15145|ARPC3_HUMAN	K.LIGNMALLPIR.S	LIGNMALLPIR	2	1	2	15	25	11	1209.72	24h
sp|O15145|ARPC3_HUMAN	X.PANKQEDEVMR.X	PANKQEDEVMR	1	1	8	120	130	11	1315.62	24h
sp|O15145|ARPC3_HUMAN	X.PAYHSSLMDPDTK.X	PAYHSSLMDPDTK	2	1	4	2	14	13	1460.66	24h
sp|O15155|BET1_HUMAN	K.SLSIEIGHEVK.T	SLSIEIGHEVK	5	0.9891	2	48	58	11	1210.65	24h
sp|O15173|PGRC2_HUMAN	R.GLGAGAGAGEESPATSLPR.M	GLGAGAGAGEESPATSLPR	1	1	14	79	97	19	1696.84	24h
sp|O15260|SURF4_HUMAN	X.GQNDLMGTAEDFADQFLR.X	GQNDLMGTAEDFADQFLR	3	1	23	2	19	18	2026.9	24h
sp|O15260|SURF4_HUMAN	R.NLALGGGLLLLLAESR.S	NLALGGGLLLLLAESR	3	1	8	120	135	16	1608.95	24h
sp|O15347|HMGB3_HUMAN	K.SKFDEMAK.A	SKFDEMAK	4	0.9992	22	58	65	8	954.445	24h
sp|O15347|HMGB3_HUMAN	X.STNPGISIGDVAK.X	STNPGISIGDVAK	4	0.9999	3	113	125	13	1257.65	24h
sp|O15355|PPM1G_HUMAN	K.LTTEEVIK.E	LTTEEVIK	2	0.9872	6	105	112	8	931.522	24h
sp|O15355|PPM1G_HUMAN	R.ETPSQENGPTAK.A	ETPSQENGPTAK	2	0.9998	5	198	209	12	1257.58	24h
sp|O15355|PPM1G_HUMAN	X.NLPPEEQMISALPDIK.X	NLPPEEQMISALPDIK	3	0.9998	2	410	425	16	1793.92	24h
sp|O15355|PPM1G_HUMAN	K.ALEDAFLAIDAK.L	ALEDAFLAIDAK	2	1	5	93	104	12	1275.67	24h
sp|O15355|PPM1G_HUMAN	K.EEPGSDSGTTAVVALIR.G	EEPGSDSGTTAVVALIR	3	1	4	321	337	17	1700.86	24h
sp|O15355|PPM1G_HUMAN	R.NTAELQPESGKR.K	NTAELQPESGKR	3	1	4	509	520	12	1328.67	24h
sp|O15372|EIF3H_HUMAN	K.LFKPPQPPAR.M	LFKPPQPPAR	3	0.9886	2	304	313	10	1149.66	24h
sp|O15372|EIF3H_HUMAN	K.EGTGSTATSSSSTAGAAGK.G	EGTGSTATSSSSTAGAAGK	8	1	13	6	24	19	1626.73	24h
sp|O15372|EIF3H_HUMAN	X.NSHLINVLMWELEK.X	NSHLINVLMWELEK	4	1	7	207	220	14	1724.89	24h
sp|O15372|EIF3H_HUMAN	R.VDEMSQDIVK.Y	VDEMSQDIVK	4	1	3	250	259	10	1162.55	24h
sp|O15427|MOT4_HUMAN	X.PAAGFVAGLGK.X	PAAGFVAGLGK	1	0.989	2	279	289	11	986.551	24h
sp|O15427|MOT4_HUMAN	X.LHKPPADSGVDLR.X	LHKPPADSGVDLR	1	0.9985	5	429	441	13	1403.75	24h
sp|O15427|MOT4_HUMAN	R.LLDLSVFR.D	LLDLSVFR	1	0.9999	15	217	224	8	961.558	24h
sp|O15498|YKT6_HUMAN	K.IILHNTMESLLER.G	IILHNTMESLLER	2	0.9991	5	151	163	13	1567.84	24h
sp|O15511|ARPC5_HUMAN	K.ALAAGGVGSIVR.V	ALAAGGVGSIVR	1	1	2	132	143	12	1069.62	24h
sp|O15511|ARPC5_HUMAN	K.GFESPSDNSSAMLLQWHEK.A	GFESPSDNSSAMLLQWHEK	2	1	24	113	131	19	2161.97	24h
sp|O15511|ARPC5_HUMAN	R.QGNMTAALQAALK.N	QGNMTAALQAALK	2	1	6	48	60	13	1315.69	24h
sp|O43143|DHX15_HUMAN	R.SNLGSVVLQLK.K	SNLGSVVLQLK	1	0.9992	4	505	515	11	1156.68	24h
sp|O43143|DHX15_HUMAN	X.HRLDLGEDYPSGK.X	HRLDLGEDYPSGK	1	1	6	5	17	13	1485.72	24h
sp|O43143|DHX15_HUMAN	X.LGIDDLVHFDFMDPPAPETLMR.X	LGIDDLVHFDFMDPPAPETLMR	1	1	5	517	538	22	2528.21	24h
sp|O43148|MCES_HUMAN	K.SVLIGEFLEK.V	SVLIGEFLEK	1	0.9813	1	181	190	10	1133.63	24h
sp|O43156|TTI1_HUMAN	K.ALADILSESLHSLATSLPR.L	ALADILSESLHSLATSLPR	2	0.9992	2	369	387	19	1993.08	24h
sp|O43169|CYB5B_HUMAN	K.QYYIGDIHPSDLKPESGSK.D	QYYIGDIHPSDLKPESGSK	1	0.9894	1	89	107	19	2133.03	24h
sp|O43169|CYB5B_HUMAN	K.ELWLVIHGR.V	ELWLVIHGR	2	0.9991	19	36	44	9	1121.63	24h
sp|O43169|CYB5B_HUMAN	R.FLNEHPGGEEVLLEQAGVDASESFEDVGHSSDAR.E	FLNEHPGGEEVLLEQAGVDASESFEDVGHSSDAR	2	0.9995	8	51	84	34	3626.64	24h
sp|O43172|PRP4_HUMAN	R.ALGEPITLFGEGPAER.R	ALGEPITLFGEGPAER	2	0.9992	1	114	129	16	1655.85	24h
sp|O43175|SERA_HUMAN	K.QADVNLVNAK.L	QADVNLVNAK	2	0.9938	1	385	394	10	1070.57	24h
sp|O43175|SERA_HUMAN	R.AGTGVDNVDLEAATR.K	AGTGVDNVDLEAATR	2	1	15	76	90	15	1487.72	24h
sp|O43175|SERA_HUMAN	R.DLPLLLFR.T	DLPLLLFR	2	1	15	462	469	8	985.595	24h
sp|O43175|SERA_HUMAN	X.GTIQVITQGTSLK.X	GTIQVITQGTSLK	2	1	10	352	364	13	1344.76	24h
sp|O43175|SERA_HUMAN	K.ILQDGGLQVVEK.Q	ILQDGGLQVVEK	1	1	3	22	33	12	1297.72	24h
sp|O43175|SERA_HUMAN	R.LLSYQTSLVSDGETWHVMGISSLLPSLEAWK.Q	LLSYQTSLVSDGETWHVMGISSLLPSLEAWK	2	1	15	492	522	31	3446.74	24h
sp|O43175|SERA_HUMAN	K.TLGILGLGR.I	TLGILGLGR	2	1	9	147	155	9	898.558	24h
sp|O43175|SERA_HUMAN	R.TQTSDPAMLPTMIGLLAEAGVR.L	TQTSDPAMLPTMIGLLAEAGVR	2	1	30	470	491	22	2271.16	24h
sp|O43175|SERA_HUMAN	K.VTADVINAAEK.L	VTADVINAAEK	2	1	2	59	69	11	1129.6	24h
sp|O43252|PAPS1_HUMAN	X.RPVLLLHPLGGWTK.X	RPVLLLHPLGGWTK	2	0.9991	1	446	459	14	1585.94	24h
sp|O43252|PAPS1_HUMAN	K.VLTMAPGLITLEIVPFR.V	VLTMAPGLITLEIVPFR	2	1	5	545	561	17	1869.08	24h
sp|O43264|ZW10_HUMAN	K.AMGTLLNTAISEVIGK.I	AMGTLLNTAISEVIGK	1	0.9992	1	652	667	16	1616.88	24h
sp|O43290|SNUT1_HUMAN	R.LQAQSLSTVGPR.L	LQAQSLSTVGPR	1	0.9991	5	374	385	12	1255.69	24h
sp|O43290|SNUT1_HUMAN	K.EAAGTTAAAGTGGATEQPPR.H	EAAGTTAAAGTGGATEQPPR	4	1	1	12	31	20	1812.86	24h
sp|O43324|MCA3_HUMAN	R.QHLSSVVFIK.N	QHLSSVVFIK	1	0.971	1	157	166	10	1156.66	24h
sp|O43324|MCA3_HUMAN	K.NDIHTLLK.D	NDIHTLLK	4	0.9992	2	89	96	8	952.533	24h
sp|O43324|MCA3_HUMAN	K.AIVQQWLEYR.V	AIVQQWLEYR	5	1	5	69	78	10	1304.69	24h
sp|O43390|HNRPR_HUMAN	X.STAYEDYYYHPPPR.X	STAYEDYYYHPPPR	4	0.9963	1	428	441	14	1757.77	24h
sp|O43390|HNRPR_HUMAN	X.VQESTKGPDEAK.X	VQESTKGPDEAK	4	0.9983	5	115	126	12	1287.63	24h
sp|O43390|HNRPR_HUMAN	X.LMMDPLSGQNR.X	LMMDPLSGQNR	3	0.999	1	196	206	11	1260.59	24h
sp|O43390|HNRPR_HUMAN	X.DLYEDELVPLFEK.X	DLYEDELVPLFEK	3	1	11	175	187	13	1608.79	24h
sp|O43390|HNRPR_HUMAN	R.KYGGPPPDSVYSGVQPGIGTEVFVGK.I	KYGGPPPDSVYSGVQPGIGTEVFVGK	2	1	5	146	171	26	2634.33	24h
sp|O43390|HNRPR_HUMAN	R.NLATTVTEEILEK.S	NLATTVTEEILEK	4	1	10	347	359	13	1459.78	24h
sp|O43390|HNRPR_HUMAN	K.VTEGLVDVILYHQPDDK.K	VTEGLVDVILYHQPDDK	3	1	10	269	285	17	1939.99	24h
sp|O43396|TXNL1_HUMAN	X.VGVKPVGSDPDFQPELSGAGSR.X	VGVKPVGSDPDFQPELSGAGSR	1	0.9974	3	2	23	22	2198.09	24h
sp|O43396|TXNL1_HUMAN	R.IDQYQGADAVGLEEK.I	IDQYQGADAVGLEEK	1	1	6	88	102	15	1634.78	24h
sp|O43396|TXNL1_HUMAN	K.QHLENDPGSNEDTDIPK.G	QHLENDPGSNEDTDIPK	1	1	6	105	121	17	1907.85	24h
sp|O43399|TPD54_HUMAN	R.TPAVEGLTEAEEEELRAELTKVEEEIVTLR.Q	TPAVEGLTEAEEEELRAELTKVEEEIVTLR	5	0.938	1	35	64	30	3382.74	24h
sp|O43399|TPD54_HUMAN	X.VEEEIVTLR.X	VEEEIVTLR	5	0.9872	1	56	64	9	1086.59	24h
sp|O43399|TPD54_HUMAN	K.KTQETLSQAGQK.T	KTQETLSQAGQK	5	0.9899	1	128	139	12	1317.69	24h
sp|O43399|TPD54_HUMAN	K.TQETLSQAGQK.T	TQETLSQAGQK	5	0.9989	3	129	139	11	1189.59	24h
sp|O43399|TPD54_HUMAN	K.GLLSDSMTDVPVDTGVAAR.T	GLLSDSMTDVPVDTGVAAR	5	1	14	16	34	19	1902.93	24h
sp|O43399|TPD54_HUMAN	R.SWHDVQVSSAYVK.T	SWHDVQVSSAYVK	4	1	1	96	108	13	1504.73	24h
sp|O43399|TPD54_HUMAN	R.TPAVEGLTEAEEEELR.A	TPAVEGLTEAEEEELR	5	1	5	35	50	16	1771.85	24h
sp|O43423|AN32C_HUMAN	X.IKDLSTIEPLK.X	IKDLSTIEPLK	4	0.9722	4	96	106	11	1255.74	24h
sp|O43432|IF4G3_HUMAN	X.FMLQDVIDLR.X	FMLQDVIDLR	1	0.9755	4	971	980	10	1248.65	24h
sp|O43447|PPIH_HUMAN	X.IELFADVVPK.X	IELFADVVPK	4	0.999	8	29	38	10	1129.64	24h
sp|O43464|HTRA2_HUMAN	R.AGLRPGDVILAIGEQMVQNAEDVYEAVR.T	AGLRPGDVILAIGEQMVQNAEDVYEAVR	1	1	4	405	432	28	3012.53	24h
sp|O43488|ARK72_HUMAN	K.ALQAAYGASAPSVTSAALR.W	ALQAAYGASAPSVTSAALR	2	1	3	279	297	19	1803.95	24h
sp|O43488|ARK72_HUMAN	R.FYAYNPLAGGLLTGK.Y	FYAYNPLAGGLLTGK	3	1	10	222	236	15	1583.83	24h
sp|O43516|WIPF1_HUMAN	X.PVPPPPAPPPPPTFALANTEKPTLNK.X	PVPPPPAPPPPPTFALANTEKPTLNK	6	0.9827	1	2	27	26	2687.47	24h
sp|O43583|DENR_HUMAN	K.QEAGISEGQGTAGEEEEK.K	QEAGISEGQGTAGEEEEK	1	1	1	76	93	18	1847.8	24h
sp|O43583|DENR_HUMAN	K.WPEVDDDSIEDLGEVKK.-	WPEVDDDSIEDLGEVKK	1	1	9	182	198	17	1972.92	24h
sp|O43592|XPOT_HUMAN	R.ILMAIDSELVDR.D	ILMAIDSELVDR	1	0.9974	1	145	156	12	1373.72	24h
sp|O43592|XPOT_HUMAN	R.ALAYFEQLK.I	ALAYFEQLK	1	0.9989	4	21	29	9	1081.58	24h
sp|O43592|XPOT_HUMAN	X.DLQEFIPLINQITAK.X	DLQEFIPLINQITAK	1	0.9992	1	738	752	15	1741.96	24h
sp|O43592|XPOT_HUMAN	R.LAQVSPELLLASVR.R	LAQVSPELLLASVR	1	1	1	415	428	14	1494.88	24h
sp|O43598|RCL_HUMAN	R.LIHEQDLEWLQQADVVVAEVTQPSLGVGYELGR.A	LIHEQDLEWLQQADVVVAEVTQPSLGVGYELGR	1	1	3	75	107	33	3690.89	24h
sp|O43615|TIM44_HUMAN	K.VFEPNEEALGVVLHK.D	VFEPNEEALGVVLHK	1	1	5	223	237	15	1679.89	24h
sp|O43615|TIM44_HUMAN	K.VTDLLGGLFSK.T	VTDLLGGLFSK	1	1	7	283	293	11	1148.64	24h
sp|O43670|ZN207_HUMAN	K.ETIDAVPNAIPGR.T	ETIDAVPNAIPGR	3	1	2	60	72	13	1351.71	24h
sp|O43670|ZN207_HUMAN	K.LIHPDEDISLEER.R	LIHPDEDISLEER	3	1	1	363	375	13	1564.77	24h
sp|O43676|NDUB3_HUMAN	X.IEGTPLETIQK.X	IEGTPLETIQK	3	0.9864	1	24	34	11	1227.67	24h
sp|O43681|ASNA_HUMAN	X.LPLLPHEVR.X	LPLLPHEVR	2	0.9985	1	318	326	9	1072.64	24h
sp|O43681|ASNA_HUMAN	R.LLNFPTIVER.G	LLNFPTIVER	2	1	2	176	185	10	1200.69	24h
sp|O43681|ASNA_HUMAN	X.YLDQMEDLYEDFHIVK.X	YLDQMEDLYEDFHIVK	2	1	4	302	317	16	2056.94	24h
sp|O43684|BUB3_HUMAN	K.MHDLNTDQENLVGTHDAPIR.C	MHDLNTDQENLVGTHDAPIR	1	1	12	81	100	20	2275.07	24h
sp|O43684|BUB3_HUMAN	R.VAVEYLDPSPEVQK.K	VAVEYLDPSPEVQK	1	1	5	203	216	14	1572.8	24h
sp|O43707|ACTN4_HUMAN	K.QQSNEHLR.R	QQSNEHLR	2	0.998	1	644	651	8	1010.49	24h
sp|O43707|ACTN4_HUMAN	R.DLLLDPAWEK.Q	DLLLDPAWEK	10	0.9984	4	41	50	10	1198.62	24h
sp|O43707|ACTN4_HUMAN	K.ALDFIASK.G	ALDFIASK	7	0.9992	15	115	122	8	863.473	24h
sp|O43707|ACTN4_HUMAN	R.EAILAIHK.E	EAILAIHK	2	0.9992	7	585	592	8	893.532	24h
sp|O43707|ACTN4_HUMAN	K.AGTQIENIDEDFR.D	AGTQIENIDEDFR	4	1	6	67	79	13	1506.69	24h
sp|O43707|ACTN4_HUMAN	K.AGTQIENIDEDFRDGLK.L	AGTQIENIDEDFRDGLK	4	1	2	67	83	17	1919.92	24h
sp|O43707|ACTN4_HUMAN	K.AIMTYVSSFYHAFSGAQK.A	AIMTYVSSFYHAFSGAQK	6	1	17	256	273	18	2006.95	24h
sp|O43707|ACTN4_HUMAN	R.ASFNHFDKDHGGALGPEEFK.A	ASFNHFDKDHGGALGPEEFK	2	1	6	772	791	20	2202.01	24h
sp|O43707|ACTN4_HUMAN	K.ASIHEAWTDGK.E	ASIHEAWTDGK	5	1	8	422	432	11	1213.57	24h
sp|O43707|ACTN4_HUMAN	K.DGLAFNALIHR.H	DGLAFNALIHR	5	1	17	194	204	11	1225.65	24h
sp|O43707|ACTN4_HUMAN	K.DHGGALGPEEFK.A	DHGGALGPEEFK	2	1	2	780	791	12	1255.58	24h
sp|O43707|ACTN4_HUMAN	R.DYETATLSDIK.A	DYETATLSDIK	2	1	2	440	450	11	1254.6	24h
sp|O43707|ACTN4_HUMAN	R.ETTDTDTADQVIASFK.V	ETTDTDTADQVIASFK	2	1	14	838	853	16	1740.81	24h
sp|O43707|ACTN4_HUMAN	K.GISQEQMQEFR.A	GISQEQMQEFR	2	1	5	761	771	11	1351.62	24h
sp|O43707|ACTN4_HUMAN	K.GYEEWLLNEIR.R	GYEEWLLNEIR	6	1	2	396	406	11	1420.7	24h
sp|O43707|ACTN4_HUMAN	R.HRPELIEYDK.L	HRPELIEYDK	3	1	13	205	214	10	1298.66	24h
sp|O43707|ACTN4_HUMAN	K.HTNYTMEHIR.V	HTNYTMEHIR	6	1	6	724	733	10	1300.6	24h
sp|O43707|ACTN4_HUMAN	R.ISIEMNGTLEDQLSHLK.Q	ISIEMNGTLEDQLSHLK	2	1	5	675	691	17	1926.97	24h
sp|O43707|ACTN4_HUMAN	R.KDDPVTNLNNAFEVAEK.Y	KDDPVTNLNNAFEVAEK	3	1	11	217	233	17	1902.93	24h
sp|O43707|ACTN4_HUMAN	X.KHEAFESDLAAHQDR.X	KHEAFESDLAAHQDR	6	1	14	455	469	15	1752.82	24h
sp|O43707|ACTN4_HUMAN	K.LASDLLEWIR.R	LASDLLEWIR	6	1	1	301	310	10	1214.66	24h
sp|O43707|ACTN4_HUMAN	K.LSGSNPYTTVTPQIINSK.W	LSGSNPYTTVTPQIINSK	2	1	5	605	622	18	1919	24h
sp|O43707|ACTN4_HUMAN	K.LVSIGAEEIVDGNAK.M	LVSIGAEEIVDGNAK	3	1	12	126	140	15	1513.8	24h
sp|O43707|ACTN4_HUMAN	K.MLDAEDIVNTARPDEK.A	MLDAEDIVNTARPDEK	3	1	16	240	255	16	1815.87	24h
sp|O43707|ACTN4_HUMAN	K.MTLGMIWTIILR.F	MTLGMIWTIILR	8	1	5	141	152	12	1446.81	24h
sp|O43707|ACTN4_HUMAN	K.MVSDINNGWQHLEQAEK.G	MVSDINNGWQHLEQAEK	2	1	20	379	395	17	1997.92	24h
sp|O43707|ACTN4_HUMAN	K.NVNVQNFHISWK.D	NVNVQNFHISWK	3	1	16	182	193	12	1484.75	24h
sp|O43707|ACTN4_HUMAN	R.QFASQANVVGPWIQTK.M	QFASQANVVGPWIQTK	2	1	4	653	668	16	1772.92	24h
sp|O43707|ACTN4_HUMAN	K.QLEAIDQLHLEYAK.R	QLEAIDQLHLEYAK	2	1	12	522	535	14	1669.87	24h
sp|O43707|ACTN4_HUMAN	K.RDHALLEEQSK.Q	RDHALLEEQSK	2	1	1	633	643	11	1324.67	24h
sp|O43707|ACTN4_HUMAN	X.SIVDYKPNLDLLEQQHQLIQEALIFDNK.X	SIVDYKPNLDLLEQQHQLIQEALIFDNK	2	1	12	696	723	28	3323.74	24h
sp|O43707|ACTN4_HUMAN	R.TINEVENQILTR.D	TINEVENQILTR	5	1	15	746	757	12	1428.76	24h
sp|O43707|ACTN4_HUMAN	X.VEQIAAIAQELNELDYYDSHNVNTR.X	VEQIAAIAQELNELDYYDSHNVNTR	1	1	9	470	494	25	2904.39	24h
sp|O43707|ACTN4_HUMAN	R.VGWEQLLTTIAR.T	VGWEQLLTTIAR	5	1	8	734	745	12	1385.77	24h
sp|O43707|ACTN4_HUMAN	K.VLAGDKNFITAEELR.R	VLAGDKNFITAEELR	2	1	2	854	868	15	1674.89	24h
sp|O43707|ACTN4_HUMAN	K.VLAVNQENEHLMEDYEK.L	VLAVNQENEHLMEDYEK	3	1	15	284	300	17	2059.95	24h
sp|O43765|SGTA_HUMAN	K.HVEAVAYYK.K	HVEAVAYYK	2	0.9899	1	175	183	9	1078.54	24h
sp|O43765|SGTA_HUMAN	K.ALELDPDNETYK.S	ALELDPDNETYK	2	1	9	185	196	12	1406.66	24h
sp|O43765|SGTA_HUMAN	R.LAYAIIQFLHDQLR.H	LAYAIIQFLHDQLR	2	1	11	7	20	14	1699.94	24h
sp|O43768|ENSA_HUMAN	K.QEEENPAEETGEEK.Q	QEEENPAEETGEEK	6	1	1	5	18	14	1617.67	24h
sp|O43776|SYNC_HUMAN	X.VLAELYVSDR.X	VLAELYVSDR	3	0.9754	2	2	11	10	1163.62	24h
sp|O43776|SYNC_HUMAN	R.IFDSEEILAGYKR.E	IFDSEEILAGYKR	1	0.9961	1	479	491	13	1539.79	24h
sp|O43776|SYNC_HUMAN	K.NDPSLPEPK.C	NDPSLPEPK	3	0.9999	10	105	113	9	995.492	24h
sp|O43776|SYNC_HUMAN	R.EGIDPTPYYWYTDQR.K	EGIDPTPYYWYTDQR	1	1	15	492	506	15	1902.84	24h
sp|O43776|SYNC_HUMAN	K.EPFPTIYVDSQK.E	EPFPTIYVDSQK	3	1	4	39	50	12	1422.7	24h
sp|O43776|SYNC_HUMAN	K.EPFPTIYVDSQKENER.W	EPFPTIYVDSQKENER	3	1	6	39	54	16	1950.93	24h
sp|O43776|SYNC_HUMAN	R.FLTWILNR.Y	FLTWILNR	1	1	14	523	530	8	1061.6	24h
sp|O43776|SYNC_HUMAN	R.IFDSEEILAGYK.R	IFDSEEILAGYK	1	1	6	479	490	12	1383.69	24h
sp|O43776|SYNC_HUMAN	R.LTESVDVLMPNVGEIVGGSMR.I	LTESVDVLMPNVGEIVGGSMR	1	1	17	458	478	21	2202.1	24h
sp|O43776|SYNC_HUMAN	K.SPAGSIVHELNPNFQPPK.R	SPAGSIVHELNPNFQPPK	1	1	12	368	385	18	1930.99	24h
sp|O43809|CPSF5_HUMAN	R.TVEGVLIVHEHR.L	TVEGVLIVHEHR	1	0.9992	3	79	90	12	1387.76	24h
sp|O43809|CPSF5_HUMAN	R.LMTEILGR.Q	LMTEILGR	1	0.9998	14	124	131	8	931.515	24h
sp|O43809|CPSF5_HUMAN	K.LPGGELNPGEDEVEGLK.R	LPGGELNPGEDEVEGLK	1	1	5	106	122	17	1751.86	24h
sp|O43809|CPSF5_HUMAN	K.LPGGELNPGEDEVEGLKR.L	LPGGELNPGEDEVEGLKR	1	1	1	106	123	18	1907.96	24h
sp|O43809|CPSF5_HUMAN	X.LPHVLLLQLGTTFFK.X	LPHVLLLQLGTTFFK	1	1	14	91	105	15	1726.02	24h
sp|O43809|CPSF5_HUMAN	K.LVAAPLFELYDNAPGYGPIISSLPQLLSR.F	LVAAPLFELYDNAPGYGPIISSLPQLLSR	1	1	4	193	221	29	3113.68	24h
sp|O43809|CPSF5_HUMAN	R.TINLYPLTNYTFGTK.E	TINLYPLTNYTFGTK	1	1	11	36	50	15	1744.9	24h
sp|O43823|AKAP8_HUMAN	K.ETPEEVAADVLAEVITAAVR.A	ETPEEVAADVLAEVITAAVR	1	1	13	568	587	20	2082.08	24h
sp|O43852|CALU_HUMAN	K.TFDQLTPEESK.E	TFDQLTPEESK	3	0.9934	1	60	70	11	1293.61	24h
sp|O43852|CALU_HUMAN	X.EEFTAFLHPEEYDYMK.X	EEFTAFLHPEEYDYMK	3	0.9979	2	174	189	16	2047.89	24h
sp|O43852|CALU_HUMAN	X.EEIVDKYDLFVGSQATDFGEALVR.X	EEIVDKYDLFVGSQATDFGEALVR	3	0.9991	1	288	311	24	2700.32	24h
sp|O43852|CALU_HUMAN	R.VHHEPQLSDK.V	VHHEPQLSDK	3	0.9999	11	28	37	10	1188.59	24h
sp|O43852|CALU_HUMAN	R.HLVYESDQNKDGK.L	HLVYESDQNKDGK	3	1	4	272	284	13	1531.72	24h
sp|O43914|TYOBP_HUMAN	X.ITETESPYQELQGQR.X	ITETESPYQELQGQR	1	0.9999	1	84	98	15	1777.85	24h
sp|O60216|RAD21_HUMAN	K.FYSFLVLK.K	FYSFLVLK	6	0.9973	5	597	604	8	1015.57	24h
sp|O60234|GMFG_HUMAN	R.QMVVLEEEFQNISPEELK.M	QMVVLEEEFQNISPEELK	2	1	7	41	58	18	2161.06	24h
sp|O60234|GMFG_HUMAN	R.TTDDLTEAWLQEK.L	TTDDLTEAWLQEK	2	1	15	125	137	13	1548.73	24h
sp|O60264|SMCA5_HUMAN	X.LLNILMQLR.X	LLNILMQLR	5	0.9993	7	446	454	9	1112.67	24h
sp|O60264|SMCA5_HUMAN	K.IDEAESLNDEELEEK.E	IDEAESLNDEELEEK	1	1	1	820	834	15	1761.78	24h
sp|O60264|SMCA5_HUMAN	K.LGFDKENVYDELR.Q	LGFDKENVYDELR	1	1	2	962	974	13	1596.78	24h
sp|O60287|NPA1P_HUMAN	X.GLGALLPTLAVDELDTVLLHTLQR.X	GLGALLPTLAVDELDTVLLHTLQR	1	0.9966	1	1183	1206	24	2557.45	24h
sp|O60306|AQR_HUMAN	X.TDVAVQIISNIYHNFPEQR.X	TDVAVQIISNIYHNFPEQR	1	0.9822	1	830	848	19	2243.13	24h
sp|O60306|AQR_HUMAN	X.LNLQFLTLHDYLLR.X	LNLQFLTLHDYLLR	1	0.9966	2	455	468	14	1757.98	24h
sp|O60313|OPA1_HUMAN	X.SLIDMYSEVLDVLSDYDASYNTQDHLPR.X	SLIDMYSEVLDVLSDYDASYNTQDHLPR	6	1	1	263	290	28	3258.5	24h
sp|O60341|KDM1A_HUMAN	K.APILLALVAGEAAGIMENISDDVIVGR.C	APILLALVAGEAAGIMENISDDVIVGR	1	1	5	700	726	27	2706.46	24h
sp|O60361|NDK8_HUMAN	X.DRPFFPGLVK.X	DRPFFPGLVK	4	0.9992	11	42	51	10	1174.65	24h
sp|O60361|NDK8_HUMAN	X.VMLGETNPADSKPGTIR.X	VMLGETNPADSKPGTIR	7	1	21	74	90	17	1784.91	24h
sp|O60361|NDK8_HUMAN	X.YMNSGPVVAMVWEGLNVVK.X	YMNSGPVVAMVWEGLNVVK	4	1	31	52	70	19	2092.04	24h
sp|O60493|SNX3_HUMAN	K.VAGHPLAQNER.C	VAGHPLAQNER	1	0.9889	1	129	139	11	1190.62	24h
sp|O60493|SNX3_HUMAN	K.VVVPPLPGK.A	VVVPPLPGK	1	1	2	87	95	9	904.572	24h
sp|O60493|SNX3_HUMAN	R.YSDFEWLR.S	YSDFEWLR	1	1	11	71	78	8	1114.51	24h
sp|O60506|HNRPQ_HUMAN	K.LKDYAFIHFDER.D	LKDYAFIHFDER	1	0.9884	4	370	381	12	1552.77	24h
sp|O60506|HNRPQ_HUMAN	K.EQILEEFSK.V	EQILEEFSK	1	0.9974	3	257	265	9	1121.56	24h
sp|O60506|HNRPQ_HUMAN	R.LFVGSIPK.S	LFVGSIPK	5	0.9998	14	245	252	8	859.514	24h
sp|O60506|HNRPQ_HUMAN	K.AGPIWDLR.L	AGPIWDLR	4	1	8	185	192	8	926.496	24h
sp|O60506|HNRPQ_HUMAN	R.AIEALKEFNEDGALAVLQQFK.D	AIEALKEFNEDGALAVLQQFK	2	1	10	61	81	21	2333.22	24h
sp|O60506|HNRPQ_HUMAN	X.DLEGENIEIVFAKPPDQK.X	DLEGENIEIVFAKPPDQK	1	1	7	395	412	18	2041.04	24h
sp|O60506|HNRPQ_HUMAN	X.DLFEDELVPLFEK.X	DLFEDELVPLFEK	2	1	15	172	184	13	1592.8	24h
sp|O60506|HNRPQ_HUMAN	K.DSDLSHVQNK.S	DSDLSHVQNK	2	1	8	82	91	10	1141.54	24h
sp|O60506|HNRPQ_HUMAN	K.DYAFIHFDER.D	DYAFIHFDER	1	1	2	372	381	10	1311.59	24h
sp|O60506|HNRPQ_HUMAN	K.EFNEDGALAVLQQFK.D	EFNEDGALAVLQQFK	2	1	19	67	81	15	1707.85	24h
sp|O60506|HNRPQ_HUMAN	R.KYGGPPPDSVYSGQQPSVGTEIFVGK.I	KYGGPPPDSVYSGQQPSVGTEIFVGK	2	1	3	143	168	26	2693.33	24h
sp|O60506|HNRPQ_HUMAN	K.LDEIYVAGLVAHSDLDER.A	LDEIYVAGLVAHSDLDER	2	1	1	43	60	18	2014	24h
sp|O60506|HNRPQ_HUMAN	R.NLANTVTEEILEK.A	NLANTVTEEILEK	1	1	8	344	356	13	1472.77	24h
sp|O60506|HNRPQ_HUMAN	R.TGYTLDVTTGQR.K	TGYTLDVTTGQR	5	1	11	131	142	12	1310.65	24h
sp|O60506|HNRPQ_HUMAN	K.TKEQILEEFSK.V	TKEQILEEFSK	1	1	11	255	265	11	1350.7	24h
sp|O60506|HNRPQ_HUMAN	K.VTEGLTDVILYHQPDDK.K	VTEGLTDVILYHQPDDK	1	1	26	266	282	17	1941.97	24h
sp|O60506|HNRPQ_HUMAN	K.VWGNVGTVEWADPIEDPDPEVMAK.V	VWGNVGTVEWADPIEDPDPEVMAK	1	1	17	313	336	24	2653.23	24h
sp|O60506|HNRPQ_HUMAN	K.YGGPPPDSVYSGQQPSVGTEIFVGK.I	YGGPPPDSVYSGQQPSVGTEIFVGK	2	1	2	144	168	25	2565.24	24h
sp|O60610|DIAP1_HUMAN	K.KLSVEEFFMDLHNFR.N	KLSVEEFFMDLHNFR	7	0.9955	1	1128	1142	15	1910.93	24h
sp|O60610|DIAP1_HUMAN	K.AEPHFLSILQHLLLVR.N	AEPHFLSILQHLLLVR	8	1	23	406	421	16	1885.09	24h
sp|O60610|DIAP1_HUMAN	K.ELGEYFLFDPK.K	ELGEYFLFDPK	7	1	6	1117	1127	11	1356.66	24h
sp|O60610|DIAP1_HUMAN	X.EQLIDMNAEGDETGVMDSLLEALQSGAAFR.X	EQLIDMNAEGDETGVMDSLLEALQSGAAFR	7	1	2	1184	1213	30	3209.48	24h
sp|O60610|DIAP1_HUMAN	R.HLQIEIEGLIDQMIDK.T	HLQIEIEGLIDQMIDK	8	1	4	456	471	16	1893.99	24h
sp|O60610|DIAP1_HUMAN	R.LGLHQVLQDLR.E	LGLHQVLQDLR	8	1	1	341	351	11	1290.74	24h
sp|O60610|DIAP1_HUMAN	K.LSVEEFFMDLHNFR.N	LSVEEFFMDLHNFR	7	1	12	1129	1142	14	1782.84	24h
sp|O60610|DIAP1_HUMAN	R.MEMDDFNEVFQILLNTVK.D	MEMDDFNEVFQILLNTVK	8	1	17	385	402	18	2185.04	24h
sp|O60610|DIAP1_HUMAN	R.NDYEARPQYYK.L	NDYEARPQYYK	8	1	1	422	432	11	1445.66	24h
sp|O60610|DIAP1_HUMAN	K.NVILEVNEAVLTESMIQNLIK.Q	NVILEVNEAVLTESMIQNLIK	7	1	5	876	896	21	2369.29	24h
sp|O60610|DIAP1_HUMAN	K.TAQNLSIFLGSFR.M	TAQNLSIFLGSFR	7	1	1	856	868	13	1452.77	24h
sp|O60664|PLIN3_HUMAN	R.QHAYEHSLGK.L	QHAYEHSLGK	1	0.9992	5	248	257	10	1168.56	24h
sp|O60664|PLIN3_HUMAN	R.AQEALLQLSQVLSLMETVK.Q	AQEALLQLSQVLSLMETVK	1	1	11	265	283	19	2100.15	24h
sp|O60664|PLIN3_HUMAN	R.EALDHMVEYVAQNTPVTWLVGPFAPGITEK.A	EALDHMVEYVAQNTPVTWLVGPFAPGITEK	1	1	11	399	428	30	3311.65	24h
sp|O60664|PLIN3_HUMAN	R.IATSLDGFDVASVQQQR.Q	IATSLDGFDVASVQQQR	1	1	5	214	230	17	1833.92	24h
sp|O60664|PLIN3_HUMAN	X.QVEDLQATFSSIHSFQDLSSSILAQSR.X	QVEDLQATFSSIHSFQDLSSSILAQSR	1	1	2	365	391	27	2993.47	24h
sp|O60664|PLIN3_HUMAN	K.SVVTGGVQSVMGSR.L	SVVTGGVQSVMGSR	1	1	9	167	180	14	1362.69	24h
sp|O60664|PLIN3_HUMAN	R.TLTAAAVSGAQPILSK.L	TLTAAAVSGAQPILSK	1	1	8	69	84	16	1526.87	24h
sp|O60664|PLIN3_HUMAN	K.VSGAQEMVSSAK.D	VSGAQEMVSSAK	1	1	5	129	140	12	1192.57	24h
sp|O60711|LPXN_HUMAN	K.DFLAMFSPK.C	DFLAMFSPK	3	0.9988	4	261	269	9	1054.51	24h
sp|O60711|LPXN_HUMAN	K.ASLDSMLGGLEQELQDLGIATVPK.G	ASLDSMLGGLEQELQDLGIATVPK	3	1	20	126	149	24	2484.28	24h
sp|O60711|LPXN_HUMAN	K.TSAAAQLDELMAHLTEMQAK.V	TSAAAQLDELMAHLTEMQAK	4	1	1	87	106	20	2158.04	24h
sp|O60739|EIF1B_HUMAN	X.GDDLLPAGTEDYIHIR.X	GDDLLPAGTEDYIHIR	4	1	6	19	34	16	1783.87	24h
sp|O60763|USO1_HUMAN	X.GVMGGQSAGPQHTEAETIQK.X	GVMGGQSAGPQHTEAETIQK	1	0.9992	4	6	25	20	2024.96	24h
sp|O60763|USO1_HUMAN	X.SQLNSQSVEITK.X	SQLNSQSVEITK	1	0.9998	2	799	810	12	1332.69	24h
sp|O60763|USO1_HUMAN	R.LEVGIQAMEHLIHVLQTDR.S	LEVGIQAMEHLIHVLQTDR	1	1	4	55	73	19	2201.16	24h
sp|O60763|USO1_HUMAN	K.SSQTSGTNEQSSAIVSAR.D	SSQTSGTNEQSSAIVSAR	1	1	5	765	782	18	1808.85	24h
sp|O60784|TOM1_HUMAN	K.VLNLIQSWADAFR.S	VLNLIQSWADAFR	8	1	7	117	129	13	1531.81	24h
sp|O60812|HNRCL_HUMAN	X.LKGDDLQAIK.X	LKGDDLQAIK	2	0.9993	12	175	184	10	1099.62	24h
sp|O60812|HNRCL_HUMAN	X.AAVAGEDGR.X	AAVAGEDGR	3	1	6	65	73	9	844.402	24h
sp|O60814|H2B1K_HUMAN	X.LLLPGELAK.X	LLLPGELAK	17	0.9898	13	101	109	9	952.594	24h
sp|O60814|H2B1K_HUMAN	X.AMGIMNSFVNDIFER.X	AMGIMNSFVNDIFER	16	1	413	59	73	15	1742.81	24h
sp|O60832|DKC1_HUMAN	K.QEYVDYSESAK.K	QEYVDYSESAK	2	0.9999	1	414	424	11	1317.57	24h
sp|O60832|DKC1_HUMAN	K.AGLESGAEPGDGDSDTTK.K	AGLESGAEPGDGDSDTTK	2	1	2	481	498	18	1705.73	24h
sp|O60832|DKC1_HUMAN	K.LDTSQWPLLLK.N	LDTSQWPLLLK	3	1	5	47	57	11	1312.74	24h
sp|O60841|IF2P_HUMAN	K.LLQAQGVEVPSK.D	LLQAQGVEVPSK	1	0.9988	1	425	436	12	1267.71	24h
sp|O60841|IF2P_HUMAN	R.HFEATDILVSK.I	HFEATDILVSK	1	0.9999	1	1175	1185	11	1258.65	24h
sp|O60841|IF2P_HUMAN	X.IFSAEIIYHLFDAFTK.X	IFSAEIIYHLFDAFTK	1	1	4	1056	1071	16	1913.99	24h
sp|O60841|IF2P_HUMAN	X.IPGMLIIDTPGHESFSNLR.X	IPGMLIIDTPGHESFSNLR	1	1	1	695	713	19	2096.07	24h
sp|O60869|EDF1_HUMAN	K.INEKPQVIADYESGR.A	INEKPQVIADYESGR	1	1	3	99	113	15	1717.86	24h
sp|O60884|DNJA2_HUMAN	X.FDVQFPENNWINPDK.X	FDVQFPENNWINPDK	1	0.9993	1	333	347	15	1861.86	24h
sp|O60884|DNJA2_HUMAN	R.DGNDLHMTYK.I	DGNDLHMTYK	1	1	2	263	272	10	1192.52	24h
sp|O60888|CUTA_HUMAN	X.TQSSLVPALTDFVR.X	TQSSLVPALTDFVR	2	0.9992	2	125	138	14	1532.82	24h
sp|O60888|CUTA_HUMAN	R.SVHPYEVAEVIALPVEQGNFPYLQWVR.Q	SVHPYEVAEVIALPVEQGNFPYLQWVR	1	1	15	139	165	27	3139.61	24h
sp|O60925|PFD1_HUMAN	K.EAIHSQLLEK.Q	EAIHSQLLEK	2	1	4	74	83	10	1166.63	24h
sp|O60925|PFD1_HUMAN	K.LADIQIEQLNR.T	LADIQIEQLNR	2	1	8	29	39	11	1311.71	24h
sp|O75083|WDR1_HUMAN	K.VFASLPQVER.G	VFASLPQVER	5	0.9396	3	8	17	10	1144.62	24h
sp|O75083|WDR1_HUMAN	R.LYSILGTTLK.D	LYSILGTTLK	3	0.9992	5	471	480	10	1107.65	24h
sp|O75083|WDR1_HUMAN	X.LYSILGTTLKDEGK.X	LYSILGTTLKDEGK	3	1	6	471	484	14	1536.84	24h
sp|O75223|GGCT_HUMAN	K.AIEPNDYTGK.V	AIEPNDYTGK	3	0.9964	2	162	171	10	1106.52	24h
sp|O75223|GGCT_HUMAN	K.ENGLPLEYQEK.L	ENGLPLEYQEK	3	0.9992	5	149	159	11	1318.64	24h
sp|O75223|GGCT_HUMAN	K.VSEEIEDIIK.K	VSEEIEDIIK	3	0.9999	7	172	181	10	1173.61	24h
sp|O75312|ZPR1_HUMAN	R.IPELDFEIPAFSQK.G	IPELDFEIPAFSQK	1	1	1	127	140	14	1632.84	24h
sp|O75340|PDCD6_HUMAN	K.QALSGFGYR.L	QALSGFGYR	1	0.9013	1	117	125	9	997.496	24h
sp|O75340|PDCD6_HUMAN	R.SIISMFDR.E	SIISMFDR	2	0.9321	2	67	74	8	967.478	24h
sp|O75340|PDCD6_HUMAN	R.LSDQFHDILIR.K	LSDQFHDILIR	2	0.9872	4	126	136	11	1355.72	24h
sp|O75347|TBCA_HUMAN	K.MRAEDGENYDIKK.Q	MRAEDGENYDIKK	7	0.9946	1	40	52	13	1567.73	24h
sp|O75347|TBCA_HUMAN	R.ILENEKDLEEAEEYKEAR.L	ILENEKDLEEAEEYKEAR	4	0.9979	2	81	98	18	2207.06	24h
sp|O75351|VPS4B_HUMAN	K.EAVILPIK.F	EAVILPIK	2	0.9776	1	148	155	8	881.557	24h
sp|O75351|VPS4B_HUMAN	R.IYIPLPEPHAR.A	IYIPLPEPHAR	1	0.9798	1	296	306	11	1304.72	24h
sp|O75351|VPS4B_HUMAN	K.FPHLFTGK.R	FPHLFTGK	2	0.99	9	156	163	8	945.505	24h
sp|O75351|VPS4B_HUMAN	K.LQNQLQGAIVIERPNVK.W	LQNQLQGAIVIERPNVK	1	0.9984	1	116	132	17	1919.09	24h
sp|O75351|VPS4B_HUMAN	K.AGNYEEALQLYQHAVQYFLHVVK.Y	AGNYEEALQLYQHAVQYFLHVVK	1	0.999	2	24	46	23	2719.37	24h
sp|O75351|VPS4B_HUMAN	R.GILLFGPPGTGK.S	GILLFGPPGTGK	3	1	8	169	180	12	1155.66	24h
sp|O75351|VPS4B_HUMAN	K.LLEPVVSMSDMLR.S	LLEPVVSMSDMLR	1	1	12	404	416	13	1488.77	24h
sp|O75367|H2AY_HUMAN	K.EFVEAVLELR.K	EFVEAVLELR	2	0.999	4	240	249	10	1203.65	24h
sp|O75367|H2AY_HUMAN	R.HILLAVANDEELNQLLK.G	HILLAVANDEELNQLLK	3	1	1	80	96	17	1932.07	24h
sp|O75368|SH3L1_HUMAN	X.ENVPENSRPATGYPLPPQIFNESQYR.X	ENVPENSRPATGYPLPPQIFNESQYR	1	0.9993	1	51	76	26	3002.45	24h
sp|O75368|SH3L1_HUMAN	K.DIAANEENRK.W	DIAANEENRK	1	0.9999	13	38	47	10	1158.56	24h
sp|O75368|SH3L1_HUMAN	R.ENNAVYAFLGLTAPPGSK.E	ENNAVYAFLGLTAPPGSK	1	1	9	87	104	18	1847.94	24h
sp|O75368|SH3L1_HUMAN	K.QQDVLGFLEANK.I	QQDVLGFLEANK	1	1	2	20	31	12	1360.7	24h
sp|O75368|SH3L1_HUMAN	R.VYIASSSGSTAIK.K	VYIASSSGSTAIK	1	1	9	5	17	13	1282.67	24h
sp|O75369|FLNB_HUMAN	X.LIALLEVLSQK.X	LIALLEVLSQK	8	1	5	50	60	11	1225.76	24h
sp|O75390|CISY_HUMAN	X.DYIWNTLNSGR.X	DYIWNTLNSGR	1	0.9775	1	330	340	11	1337.63	24h
sp|O75390|CISY_HUMAN	K.SMSTEGLMK.F	SMSTEGLMK	1	0.988	4	451	459	9	982.444	24h
sp|O75390|CISY_HUMAN	X.VVPGYGHAVLR.X	VVPGYGHAVLR	1	0.9978	14	341	351	11	1166.65	24h
sp|O75390|CISY_HUMAN	K.DILADLIPK.E	DILADLIPK	1	0.9998	10	35	43	9	996.584	24h
sp|O75390|CISY_HUMAN	R.AALPSHVVTMLDNFPTNLHPMSQLSAAVTALNSESNFAR.A	AALPSHVVTMLDNFPTNLHPMSQLSAAVTALNSESNFAR	1	1	10	145	183	39	4151.06	24h
sp|O75390|CISY_HUMAN	R.ALGVLAQLIWSR.A	ALGVLAQLIWSR	1	1	2	429	440	12	1325.78	24h
sp|O75390|CISY_HUMAN	K.GLVYETSVLDPDEGIR.F	GLVYETSVLDPDEGIR	1	1	14	77	92	16	1761.88	24h
sp|O75390|CISY_HUMAN	K.HLPNDPMFK.L	HLPNDPMFK	1	1	11	367	375	9	1097.53	24h
sp|O75390|CISY_HUMAN	K.IVPNVLLEQGK.A	IVPNVLLEQGK	1	1	7	383	393	11	1208.71	24h
sp|O75390|CISY_HUMAN	K.TVVGQITVDMMYGGMR.G	TVVGQITVDMMYGGMR	1	1	1	58	73	16	1756.83	24h
sp|O75396|SC22B_HUMAN	X.VLLTMIAR.X	VLLTMIAR	1	0.9039	1	2	9	8	915.556	24h
sp|O75396|SC22B_HUMAN	R.DLQQYQSQAK.Q	DLQQYQSQAK	1	0.9962	9	29	38	10	1207.58	24h
sp|O75396|SC22B_HUMAN	R.IMVANIEEVLQR.G	IMVANIEEVLQR	1	1	1	148	159	12	1413.76	24h
sp|O75400|PR40A_HUMAN	X.DRLEIYEDVLFFLSK.X	DRLEIYEDVLFFLSK	3	0.9863	1	503	517	15	1885.98	24h
sp|O75400|PR40A_HUMAN	X.FVKEPAFEDITLESER.X	FVKEPAFEDITLESER	3	0.9976	1	774	789	16	1908.95	24h
sp|O75400|PR40A_HUMAN	R.ALEKEEEEEKQK.S	ALEKEEEEEKQK	3	0.9989	2	587	598	12	1488.73	24h
sp|O75400|PR40A_HUMAN	X.FTNMLGQPGSTALDLFK.X	FTNMLGQPGSTALDLFK	2	1	4	646	662	17	1838.92	24h
sp|O75436|VP26A_HUMAN	K.HYLFYDGESVSGK.V	HYLFYDGESVSGK	2	1	1	39	51	13	1500.68	24h
sp|O75436|VP26A_HUMAN	K.YEIMDGAPVKGESIPIR.L	YEIMDGAPVKGESIPIR	1	1	3	233	249	17	1873.96	24h
sp|O75438|NDUB1_HUMAN	X.ELQPSEEVTWK.X	ELQPSEEVTWK	1	0.9852	1	48	58	11	1344.66	24h
sp|O75438|NDUB1_HUMAN	X.MVNLLQIVR.X	MVNLLQIVR	1	0.9965	1	1	9	9	1084.64	24h
sp|O75475|PSIP1_HUMAN	X.LPIFFFGTHETAFLGPK.X	LPIFFFGTHETAFLGPK	1	0.9993	8	40	56	17	1921.01	24h
sp|O75475|PSIP1_HUMAN	K.NMFLVGEGDSVITQVLNK.S	NMFLVGEGDSVITQVLNK	1	1	1	425	442	18	1963.01	24h
sp|O75477|ERLN1_HUMAN	K.EALEPSGENVIQNK.E	EALEPSGENVIQNK	2	0.9995	3	329	342	14	1526.76	24h
sp|O75489|NDUS3_HUMAN	X.KFDLNSPWEAFPVYR.X	KFDLNSPWEAFPVYR	1	0.9993	2	232	246	15	1867.92	24h
sp|O75489|NDUS3_HUMAN	X.EIWDMFGVFFANHPDLR.X	EIWDMFGVFFANHPDLR	1	1	2	169	185	17	2092.98	24h
sp|O75489|NDUS3_HUMAN	R.VVAEPVELAQEFR.K	VVAEPVELAQEFR	1	1	1	219	231	13	1485.78	24h
sp|O75494|SRS10_HUMAN	X.QIEIQFAQGDR.X	QIEIQFAQGDR	4	0.9971	1	80	90	11	1303.65	24h
sp|O75494|SRS10_HUMAN	R.YGPIVDVYVPLDFYTR.R	YGPIVDVYVPLDFYTR	3	1	15	33	48	16	1915.97	24h
sp|O75506|HSBP1_HUMAN	K.TVQDLTSVVQTLLQQMQDK.F	TVQDLTSVVQTLLQQMQDK	1	1	5	8	26	19	2174.12	24h
sp|O75526|HNRGT_HUMAN	R.GFAFVTFESPADAK.A	GFAFVTFESPADAK	5	1	15	50	63	14	1485.71	24h
sp|O75531|BAF_HUMAN	X.AYVVLGQFLVLK.X	AYVVLGQFLVLK	1	1	14	42	53	12	1348.81	24h
sp|O75531|BAF_HUMAN	R.DFVAEPMGEKPVGSLAGIGEVLGK.K	DFVAEPMGEKPVGSLAGIGEVLGK	1	1	24	9	32	24	2399.24	24h
sp|O75533|SF3B1_HUMAN	K.TEILPPFFK.H	TEILPPFFK	1	0.9994	8	808	816	9	1090.61	24h
sp|O75533|SF3B1_HUMAN	R.GDTPGHATPGHGGATSSAR.K	GDTPGHATPGHGGATSSAR	1	0.9999	10	271	289	19	1732.79	24h
sp|O75533|SF3B1_HUMAN	R.GGDSIGETPTPGASK.R	GGDSIGETPTPGASK	1	0.9999	11	319	333	15	1372.64	24h
sp|O75533|SF3B1_HUMAN	R.AFAVVASALGIPSLLPFLK.A	AFAVVASALGIPSLLPFLK	1	1	10	631	649	19	1913.13	24h
[truncated: 6,653 more rows]

## Sheet: 48h 3bio
protein	peptide_w_cleav	peptide	multiple_proteins	max_ID_probability	number_spectra	start	stop	length	MImass	condition
[truncated: 6,508 more rows]

[truncated: 1 more sheets: 96h 3bio]
