# Supplementary material for: Omics Technologies to Decipher Regulatory Networks in Granulocytic Cell Differentiation
Source: Biomolecules. 2021 Jun 18;11(6):907. doi: 10.3390/biom11060907 (PMC8233756; doi:10.3390/biom11060907)
Supplement: Supplementary file 1 [file biomolecules-11-00907-s001.zip › Table S5.xlsx]

## Sheet: Summary
The table contains protein identifier used in the FASTA file, annotation extracted from the FASTA file, F-statistic for ANOVA test comparing all conditions, P-value for the above F-statistic, a pooled estimate of the coefficient of variation (normalized standard deviation). The following are given for each pair of experimental conditions: 0h.3h, 0h.24h, 0h.48h, and 0h.96h– p-value for differentia…

## Sheet: relative_expression_analysis
protein	annotation	F.stat	p.value	pvals.0h.24h	pvals.0h.3h	pvals.0h.48h	pvals.0h.96	ER.24h.0h	ER.3h.0h	ER.48h.0h	ER.96.0h	CV
sp|P02786|TFR1_HUMAN	Transferrin receptor protein 1 OS=Homo sapiens GN=TFRC PE=1 SV=2	16.4686	1.77567e-05	0.0321663	0.00688494	0.00139463	2.23464e-05	0.612596	1.78746	0.370356	0.104288	0.21475
sp|P78527|PRKDC_HUMAN	DNA-dependent protein kinase catalytic subunit OS=Homo sapiens GN=PRKDC PE=1 SV=3	14.5408	3.78707e-05	0.0176499	0.00901777	0.0139876	2.23464e-05	0.536402	1.8505	0.511219	0.0965767	0.29326
sp|Q9Y266|NUDC_HUMAN	Nuclear migration protein nudC OS=Homo sapiens GN=NUDC PE=1 SV=1	6.27732	0.00323302	0.0287331	0.0105051	0.040155	0.00465922	1.95358	2.22072	0.517615	0.216088	0.219234
sp|O60506|HNRPQ_HUMAN	Heterogeneous nuclear ribonucleoprotein Q OS=Homo sapiens GN=SYNCRIP PE=1 SV=2	5.20397	0.00726379	0.0402224	0.0339663	0.0364153	0.00594413	1.21392	1.22983	1.22704	0.710304	0.0952939
sp|P18669|PGAM1_HUMAN	Phosphoglycerate mutase 1 OS=Homo sapiens GN=PGAM1 PE=1 SV=2	24.7403	1.30106e-06	0.00128627	0.0373059	9.29752e-05	4.46927e-05	1.79951	1.38874	2.32813	2.58328	0.133966
sp|Q01518|CAP1_HUMAN	Adenylyl cyclase-associated protein 1 OS=Homo sapiens GN=CAP1 PE=1 SV=5	21.8414	2.95651e-06	0.000116054	0.0113938	0.000320248	0.000223464	1.85785	1.40404	1.7768	1.84635	0.0974773
sp|P49721|PSB2_HUMAN	Proteasome subunit beta type-2 OS=Homo sapiens GN=PSMB2 PE=1 SV=1	20.6204	4.2935e-06	0.000203095	0.000617399	0.00307851	0.000379888	5.25303	5.19509	3.63428	4.92129	0.138081
sp|Q96AG4|LRC59_HUMAN	Leucine-rich repeat-containing protein 59 OS=Homo sapiens GN=LRRC59 PE=1 SV=1	18.8163	7.71271e-06	0.000551257	0.00594013	0.000650826	0.000223464	3.39576	2.55025	3.4393	3.9388	0.167037
sp|P29692|EF1D_HUMAN	Elongation factor 1-delta OS=Homo sapiens GN=EEF1D PE=1 SV=5	16.1025	2.0392e-05	0.00141199	0.00500468	0.00088843	0.000391061	2.05884	1.90539	2.23234	2.38454	0.12711
sp|P40926|MDHM_HUMAN	Malate dehydrogenase, mitochondrial OS=Homo sapiens GN=MDH2 PE=1 SV=3	14.0743	4.60114e-05	0.0171277	0.0121235	0.00103306	0.00027933	1.384	1.44045	1.70331	1.88903	0.117656
sp|Q96KP4|CNDP2_HUMAN	Cytosolic non-specific dipeptidase OS=Homo sapiens GN=CNDP2 PE=1 SV=2	12.5787	8.89069e-05	0.00216634	0.0176052	0.00125	0.00103911	1.80429	1.5558	1.95943	1.93894	0.161037
sp|P05387|RLA2_HUMAN	60S acidic ribosomal protein P2 OS=Homo sapiens GN=RPLP2 PE=1 SV=1	11.9534	0.000119112	0.00213733	0.0395416	0.00392562	0.000446927	1.63912	1.3426	1.60906	1.8663	0.122947
sp|P46777|RL5_HUMAN	60S ribosomal protein L5 OS=Homo sapiens GN=RPL5 PE=1 SV=3	9.05012	0.000544356	0.0045648	0.00579046	0.0140496	0.00381006	1.62139	1.64742	1.51932	1.63869	0.11148
sp|O43776|SYNC_HUMAN	Asparaginyl-tRNA synthetase, cytoplasmic OS=Homo sapiens GN=NARS PE=1 SV=1	8.80852	0.000626474	0.00233075	0.00597755	0.0112913	0.0136313	1.64782	1.57228	1.47938	1.43848	0.100546
sp|P09211|GSTP1_HUMAN	Glutathione S-transferase P OS=Homo sapiens GN=GSTP1 PE=1 SV=2	7.46676	0.00143441	0.00776596	0.0140973	0.0115186	0.00646927	1.46876	1.42145	1.44017	1.47104	0.122639
sp|O14818|PSA7_HUMAN	Proteasome subunit alpha type-7 OS=Homo sapiens GN=PSMA7 PE=1 SV=1	6.52754	0.00270636	0.0339555	0.00736202	0.0459711	0.00431285	1.66359	2.03021	1.61141	2.06793	0.180515
sp|P15531|NDKA_HUMAN	Nucleoside diphosphate kinase A OS=Homo sapiens GN=NME1 PE=1 SV=1	6.10762	0.00365554	0.0153482	0.0396258	0.00381198	0.0458771	1.45598	1.35482	1.65401	1.33568	0.157062
sp|P04264|K2C1_HUMAN	Keratin, type II cytoskeletal 1 OS=Homo sapiens GN=KRT1 PE=1 SV=6	5.75066	0.00476232	0.0378143	0.0207764	0.00621901	0.0299888	7.63583	10.003	13.2474	6.64118	0.608407
sp|P53618|COPB_HUMAN	Coatomer subunit beta OS=Homo sapiens GN=COPB1 PE=1 SV=3	4.56994	0.0121908	0.0366731	0.0153227	0.0441219	0.0303352	1.77688	2.09259	1.76784	1.84188	0.14867
sp|Q8TEX9|IPO4_HUMAN	Importin-4 OS=Homo sapiens GN=IPO4 PE=1 SV=2	11.9152	0.000121302	0.097853	0.00644528	0.00594008	0.000134078	0.792507	1.65755	0.54862	0.26643	0.171203
sp|P55060|XPO2_HUMAN	Exportin-2 OS=Homo sapiens GN=CSE1L PE=1 SV=3	6.95675	0.0020124	0.240764	0.0392516	0.0363636	0.000424581	1.13939	1.41483	0.675741	0.330938	0.228035
sp|O00567|NOP56_HUMAN	Nucleolar protein 56 OS=Homo sapiens GN=NOP56 PE=1 SV=4	6.31895	0.00313793	0.204932	0.037652	0.0128719	0.0012067	0.793784	1.61808	0.50187	0.255935	0.23305
sp|O00410|IPO5_HUMAN	Importin-5 OS=Homo sapiens GN=IPO5 PE=1 SV=4	4.90294	0.00925159	0.322118	0.0325819	0.016436	0.00468156	1.06934	1.2932	0.716964	0.647567	0.10877
sp|Q9BTT0|AN32E_HUMAN	Acidic leucine-rich nuclear phosphoprotein 32 family member E OS=Homo sapiens GN=ANP32E PE=1 SV=1	5.9004	0.0042578	0.0183752	0.015276	0.324277	0.00256983	1.94926	1.95133	1.1764	0.22069	0.21723
sp|Q9Y5M8|SRPRB_HUMAN	Signal recognition particle receptor subunit beta OS=Homo sapiens GN=SRPRB PE=1 SV=3	7.98593	0.0010305	0.00481625	0.00434051	0.00528926	0.150045	1.93368	2.05392	1.9738	1.27521	0.129191
sp|Q9GZT3|SLIRP_HUMAN	SRA stem-loop-interacting RNA-binding protein, mitochondrial OS=Homo sapiens GN=SLIRP PE=1 SV=1	7.55351	0.00135601	0.00720503	0.00336763	0.00677686	0.281821	4.2002	5.68907	4.55968	1.63066	0.173402
sp|Q8WUM4|PDC6I_HUMAN	Programmed cell death 6-interacting protein OS=Homo sapiens GN=PDCD6IP PE=1 SV=1	6.0154	0.0039109	0.0037234	0.0111506	0.0205888	0.184804	1.63599	1.53547	1.46583	1.16787	0.108178
sp|O95831|AIFM1_HUMAN	Apoptosis-inducing factor 1, mitochondrial OS=Homo sapiens GN=AIFM1 PE=1 SV=1	5.25919	0.00695372	0.00777563	0.0297474	0.0210537	0.0508603	5.2864	3.84524	3.91288	2.98875	0.256691
sp|P62942|FKB1A_HUMAN	Peptidyl-prolyl cis-trans isomerase FKBP1A OS=Homo sapiens GN=FKBP1A PE=1 SV=2	5.1675	0.00747707	0.00768859	0.038391	0.0129545	0.0946145	2.11593	1.7103	2.02642	1.46131	0.158348
sp|P54578|UBP14_HUMAN	Ubiquitin carboxyl-terminal hydrolase 14 OS=Homo sapiens GN=USP14 PE=1 SV=3	4.77988	0.010234	0.0189845	0.00735267	0.0315909	0.377408	1.98936	2.26178	1.84268	0.909526	0.172482
sp|O14950|ML12B_HUMAN	Myosin regulatory light chain 12B OS=Homo sapiens GN=MYL12B PE=1 SV=2	6.57029	0.00262638	0.00437137	0.011609	0.0749277	0.010838	2.64631	2.29982	1.65855	2.23888	0.214615
sp|P53634|CATC_HUMAN	Dipeptidyl peptidase 1 OS=Homo sapiens GN=CTSC PE=1 SV=2	5.71595	0.00488862	0.0286557	0.0136483	0.0661983	0.00528492	1.79087	2.06712	1.57819	2.19575	0.227727
sp|P50991|TCPD_HUMAN	T-complex protein 1 subunit delta OS=Homo sapiens GN=CCT4 PE=1 SV=4	4.21856	0.0164738	0.0250967	0.014696	0.363357	0.0186816	1.35764	1.41801	1.06451	1.37881	0.113151
sp|O75844|FACE1_HUMAN	CAAX prenyl protease 1 homolog OS=Homo sapiens GN=ZMPSTE24 PE=1 SV=2	3.36336	0.0359018	0.032118	0.0458746	0.292386	0.0188268	3.35379	2.74173	1.46731	3.41405	0.285844
sp|P13667|PDIA4_HUMAN	Protein disulfide-isomerase A4 OS=Homo sapiens GN=PDIA4 PE=1 SV=2	15.9043	2.20008e-05	0.104265	0.0150608	0.00826446	3.35196e-05	0.828538	1.38704	1.43793	2.19353	0.0930432
sp|P61619|S61A1_HUMAN	Protein transport protein Sec61 subunit alpha isoform 1 OS=Homo sapiens GN=SEC61A1 PE=1 SV=2	6.79075	0.00225386	0.43736	0.0344808	0.00618802	0.00167598	1.04801	1.74203	2.20021	2.53602	0.142531
sp|Q96HE7|ERO1A_HUMAN	ERO1-like protein alpha OS=Homo sapiens GN=ERO1L PE=1 SV=2	6.19297	0.00343577	0.216451	0.042928	0.0430165	0.000882682	0.781931	1.86102	1.93224	3.15435	0.175306
sp|P26639|SYTC_HUMAN	Threonyl-tRNA synthetase, cytoplasmic OS=Homo sapiens GN=TARS PE=1 SV=3	5.62475	0.00523875	0.184787	0.0437325	0.00709711	0.00482682	1.35996	1.93298	2.35319	2.40531	0.231438
sp|Q9H2U2|IPYR2_HUMAN	Inorganic pyrophosphatase 2, mitochondrial OS=Homo sapiens GN=PPA2 PE=1 SV=2	4.88373	0.00939775	0.0595358	0.016492	0.0218492	0.0218547	2.24047	2.8874	2.75722	2.68774	0.26854
sp|P27708|PYR1_HUMAN	CAD protein OS=Homo sapiens GN=CAD PE=1 SV=3	10.0496	0.000312059	0.454043	0.0165575	0.258399	4.46927e-05	1.02965	1.57858	0.873408	0.180414	0.102268
sp|Q14566|MCM6_HUMAN	DNA replication licensing factor MCM6 OS=Homo sapiens GN=MCM6 PE=1 SV=1	6.69938	0.00240053	0.315203	0.0376801	0.212779	0.000256983	1.09905	1.4022	0.874074	0.329714	0.185047
sp|Q9Y2X3|NOP58_HUMAN	Nucleolar protein 58 OS=Homo sapiens GN=NOP58 PE=1 SV=1	3.06332	0.0479738	0.416441	0.00872778	0.398977	0.0364134	1.07424	2.1223	0.935462	0.509015	0.220549
sp|P31939|PUR9_HUMAN	Bifunctional purine biosynthesis protein PURH OS=Homo sapiens GN=ATIC PE=1 SV=3	2.59606	0.0767066	0.442128	0.0328999	0.501601	0.0139665	1.02215	1.28888	0.999787	0.70542	0.113064
sp|P25205|MCM3_HUMAN	DNA replication licensing factor MCM3 OS=Homo sapiens GN=MCM3 PE=1 SV=3	25.6116	1.03285e-06	0.183907	0.0391581	0.000247934	0	0.896794	1.25365	0.536138	0.230412	0.138181
sp|Q9BV40|VAMP8_HUMAN	Vesicle-associated membrane protein 8 OS=Homo sapiens GN=VAMP8 PE=1 SV=1	4.90723	0.00921928	0.00470019	0.0077362	0.251911	0.174034	1.77532	1.76379	0.862746	0.803875	0.116407
sp|Q15363|TMED2_HUMAN	Transmembrane emp24 domain-containing protein 2 OS=Homo sapiens GN=TMED2 PE=1 SV=1	4.43695	0.0136454	0.00356867	0.0271188	0.231405	0.0871061	2.45368	1.89669	0.767227	1.58987	0.159508
sp|P62995|TRA2B_HUMAN	Transformer-2 protein homolog beta OS=Homo sapiens GN=TRA2B PE=1 SV=1	3.2467	0.0401423	0.0123308	0.0459588	0.0861054	0.239475	2.32858	1.88451	1.73833	1.31784	0.193546
sp|P08865|RSSA_HUMAN	40S ribosomal protein SA OS=Homo sapiens GN=RPSA PE=1 SV=4	3.20321	0.041863	0.0496615	0.00895229	0.166767	0.337732	1.45381	1.72821	1.24793	1.1028	0.186516
sp|Q15181|IPYR_HUMAN	Inorganic pyrophosphatase OS=Homo sapiens GN=PPA1 PE=1 SV=2	3.17038	0.0432155	0.0245164	0.0173152	0.371364	0.113363	1.51327	1.57004	1.06329	0.751247	0.188885
sp|P68402|PA1B2_HUMAN	Platelet-activating factor acetylhydrolase IB subunit beta OS=Homo sapiens GN=PAFAH1B2 PE=1 SV=1	3.14516	0.0442875	0.0310638	0.0380449	0.0590289	0.143251	1.77161	1.7381	1.61862	1.38908	0.174749
sp|Q12905|ILF2_HUMAN	Interleukin enhancer-binding factor 2 OS=Homo sapiens GN=ILF2 PE=1 SV=2	3.12052	0.0453634	0.0282108	0.014724	0.209628	0.219844	1.55811	1.72316	1.20728	0.819786	0.183823
sp|P51858|HDGF_HUMAN	Hepatoma-derived growth factor OS=Homo sapiens GN=HDGF PE=1 SV=1	2.90308	0.0562122	0.0253288	0.0165201	0.213657	0.466078	1.84924	1.926	0.764334	1.00127	0.185046
sp|P38159|HNRPG_HUMAN	Heterogeneous nuclear ribonucleoprotein G OS=Homo sapiens GN=RBMX PE=1 SV=3	2.81028	0.0616883	0.0119826	0.0430122	0.230465	0.326101	1.7581	1.53595	1.21114	1.10874	0.170577
sp|O00303|EIF3F_HUMAN	Eukaryotic translation initiation factor 3 subunit F OS=Homo sapiens GN=EIF3F PE=1 SV=1	2.65712	0.0720537	0.0192553	0.02855	0.266581	0.39933	1.53727	1.47857	1.12591	1.0368	0.139916
sp|Q99832|TCPH_HUMAN	T-complex protein 1 subunit eta OS=Homo sapiens GN=CCT7 PE=1 SV=2	4.44314	0.0135736	0.112689	0.0269224	0.00604339	0.102827	1.18002	1.32766	1.46077	1.18714	0.108622
sp|P13804|ETFA_HUMAN	Electron transfer flavoprotein subunit alpha, mitochondrial OS=Homo sapiens GN=ETFA PE=1 SV=1	4.20074	0.016732	0.0583946	0.0378297	0.10189	0.00703911	1.3818	1.47166	1.30854	1.66598	0.139667
sp|P04040|CATA_HUMAN	Catalase OS=Homo sapiens GN=CAT PE=1 SV=3	4.09542	0.0183535	0.39089	0.0198223	0.120455	0.00494972	0.958105	1.7285	1.34505	1.9342	0.24118
sp|Q00610|CLH1_HUMAN	Clathrin heavy chain 1 OS=Homo sapiens GN=CLTC PE=1 SV=5	3.90701	0.0217094	0.0513346	0.0437605	0.10905	0.0101564	1.36597	1.4185	1.26885	1.54757	0.177442
sp|P04843|RPN1_HUMAN	Dolichyl-diphosphooligosaccharide--protein glycosyltransferase subunit 1 OS=Homo sapiens GN=RPN1 PE=1 SV=1	3.79815	0.0239568	0.287611	0.00735267	0.317831	0.0176536	1.07919	1.40403	1.06362	1.30966	0.0929686
sp|Q07021|C1QBP_HUMAN	Complement component 1 Q subcomponent-binding protein, mitochondrial OS=Homo sapiens GN=C1QBP PE=1 SV=1	2.1038	0.128743	0.441257	0.0278952	0.361064	0.0425028	1.09415	1.91467	1.16889	1.80362	0.198204
sp|P39656|OST48_HUMAN	Dolichyl-diphosphooligosaccharide--protein glycosyltransferase 48 kDa subunit OS=Homo sapiens GN=DDOST PE=1 SV=4	1.85191	0.169246	0.292079	0.0432367	0.426105	0.045676	1.10094	1.42046	1.0262	1.40225	0.143476
sp|P54727|RD23B_HUMAN	UV excision repair protein RAD23 homolog B OS=Homo sapiens GN=RAD23B PE=1 SV=1	2.83352	0.0602636	0.108994	0.00997194	0.169029	0.22724	1.4819	2.25722	1.41216	1.27282	0.227856
sp|Q02878|RL6_HUMAN	60S ribosomal protein L6 OS=Homo sapiens GN=RPL6 PE=1 SV=3	2.65827	0.071969	0.220309	0.00753976	0.37124	0.185966	1.36764	4.98218	0.943252	1.44411	0.364232
tr|B1AK87|B1AK87_HUMAN	Capping protein (Actin filament) muscle Z-line, beta OS=Homo sapiens GN=CAPZB PE=4 SV=1	2.60218	0.0762255	0.0578143	0.0347521	0.249752	0.0623464	1.73125	2.06161	1.05992	1.73487	0.17752
sp|O14979|HNRDL_HUMAN	Heterogeneous nuclear ribonucleoprotein D-like OS=Homo sapiens GN=HNRPDL PE=1 SV=3	2.46191	0.0881268	0.173839	0.0382881	0.078812	0.073162	1.48225	2.14571	1.8039	0.437412	0.197561
sp|Q9Y265|RUVB1_HUMAN	RuvB-like 1 OS=Homo sapiens GN=RUVBL1 PE=1 SV=1	2.42727	0.0913682	0.142311	0.0183162	0.296808	0.0812514	1.23331	1.55067	0.889064	1.31716	0.147822
sp|P62158|CALM_HUMAN	Calmodulin OS=Homo sapiens GN=CALM1 PE=1 SV=2	2.37077	0.0969389	0.113801	0.0198223	0.0964773	0.389955	1.84361	2.6233	1.94958	1.30295	0.289265
sp|P52907|CAZA1_HUMAN	F-actin-capping protein subunit alpha-1 OS=Homo sapiens GN=CAPZA1 PE=1 SV=3	2.36767	0.097255	0.0691393	0.0339383	0.140165	0.145307	1.39087	1.47274	1.26607	1.2475	0.184732
sp|P55957|BID_HUMAN	BH3-interacting domain death agonist OS=Homo sapiens GN=BID PE=1 SV=1	2.30498	0.103894	0.156151	0.0110009	0.370899	0.273017	1.25738	1.79902	1.06944	1.12643	0.176571
sp|O15144|ARPC2_HUMAN	Actin-related protein 2/3 complex subunit 2 OS=Homo sapiens GN=ARPC2 PE=1 SV=1	2.07813	0.132349	0.426422	0.0348269	0.14436	0.0620559	1.03638	1.48785	1.25701	1.39916	0.162551
sp|P15880|RS2_HUMAN	40S ribosomal protein S2 OS=Homo sapiens GN=RPS2 PE=1 SV=2	2.07484	0.132819	0.0969439	0.0473901	0.169101	0.103061	1.35259	1.45961	1.2428	1.31927	0.145521
sp|P46940|IQGA1_HUMAN	Ras GTPase-activating-like protein IQGAP1 OS=Homo sapiens GN=IQGAP1 PE=1 SV=1	2.04958	0.136489	0.0987621	0.0204771	0.215269	0.399307	1.19029	1.32814	0.904847	1.03312	0.128469
sp|P80303|NUCB2_HUMAN	Nucleobindin-2 OS=Homo sapiens GN=NUCB2 PE=1 SV=2	2.02206	0.140611	0.407079	0.0182601	0.282862	0.104682	1.0897	1.76429	0.860346	1.38735	0.131278
sp|Q16181|SEPT7_HUMAN	Septin-7 OS=Homo sapiens GN=SEPT7 PE=1 SV=2	1.94368	0.1531	0.192012	0.0262021	0.108802	0.362078	1.34612	1.76857	1.43646	1.11034	0.173038
sp|P17987|TCPA_HUMAN	T-complex protein 1 subunit alpha OS=Homo sapiens GN=TCP1 PE=1 SV=1	1.83242	0.172902	0.264778	0.0136389	0.354225	0.41857	0.905367	1.55528	0.937103	0.964883	0.158472
sp|P17858|K6PL_HUMAN	6-phosphofructokinase, liver type OS=Homo sapiens GN=PFKL PE=1 SV=6	1.78533	0.182089	0.394652	0.0224322	0.483926	0.108715	1.12251	1.84538	1.03336	0.656393	0.182765
sp|P22314|UBA1_HUMAN	Ubiquitin-like modifier-activating enzyme 1 OS=Homo sapiens GN=UBA1 PE=1 SV=3	1.78245	0.182667	0.298733	0.0210945	0.150537	0.438279	1.10348	1.49358	1.21123	0.973315	0.176589
sp|Q96C90|PP14B_HUMAN	Protein phosphatase 1 regulatory subunit 14B OS=Homo sapiens GN=PPP1R14B PE=1 SV=3	1.74954	0.189414	0.136712	0.037652	0.126023	0.415832	1.33446	1.72366	1.37211	0.964814	0.167381
sp|P68104|EF1A1_HUMAN	Elongation factor 1-alpha 1 OS=Homo sapiens GN=EEF1A1 PE=1 SV=1	1.69616	0.200925	0.419739	0.0163517	0.340465	0.303508	1.03808	1.52267	1.08589	0.907085	0.191643
sp|Q96BM9|ARL8A_HUMAN	ADP-ribosylation factor-like protein 8A OS=Homo sapiens GN=ARL8A PE=1 SV=1	1.692	0.201854	0.0782882	0.038232	0.328595	0.324492	2.01504	2.36028	1.28294	1.21001	0.15931
sp|P32969|RL9_HUMAN	60S ribosomal protein L9 OS=Homo sapiens GN=RPL9 PE=1 SV=1	1.67761	0.205096	0.0951547	0.047942	0.302045	0.165553	1.47368	1.65245	0.870543	0.724761	0.173909
sp|P27348|1433T_HUMAN	14-3-3 protein theta OS=Homo sapiens GN=YWHAQ PE=1 SV=1	1.43503	0.268732	0.137321	0.0420393	0.238006	0.42505	1.18661	1.31691	1.11797	0.963555	0.126307
sp|P55263|ADK_HUMAN	Adenosine kinase OS=Homo sapiens GN=ADK PE=1 SV=2	1.40819	0.276923	0.295019	0.0498971	0.184215	0.154279	1.24158	1.73039	0.738496	0.691104	0.21221
sp|O14980|XPO1_HUMAN	Exportin-1 OS=Homo sapiens GN=XPO1 PE=1 SV=1	1.32515	0.30391	0.240087	0.0492329	0.12969	0.364972	0.836843	1.62826	0.720728	0.906992	0.235152
sp|Q7L2H7|EIF3M_HUMAN	Eukaryotic translation initiation factor 3 subunit M OS=Homo sapiens GN=EIF3M PE=1 SV=1	1.22066	0.34163	0.240764	0.0480449	0.356911	0.205397	1.28991	1.86814	1.13864	0.669448	0.225913
sp|P27797|CALR_HUMAN	Calreticulin OS=Homo sapiens GN=CALR PE=1 SV=1	1.18945	0.353764	0.342892	0.0396071	0.343802	0.241922	1.04127	1.18526	0.970949	1.06875	0.113268
sp|Q13347|EIF3I_HUMAN	Eukaryotic translation initiation factor 3 subunit I OS=Homo sapiens GN=EIF3I PE=1 SV=1	10.6008	0.000468593	0.0162282	0.000879326	0.0296488	NA	2.77035	5.25155	2.55049	0.319973	0.146637
sp|Q9NVP1|DDX18_HUMAN	ATP-dependent RNA helicase DDX18 OS=Homo sapiens GN=DDX18 PE=1 SV=2	7.78856	0.00447394	0.00640232	0.010159	NA	NA	0.315982	2.33655	0	0	0.15952
sp|Q92621|NU205_HUMAN	Nuclear pore complex protein Nup205 OS=Homo sapiens GN=NUP205 PE=1 SV=3	9.56207	0.00712178	NA	0.00644528	NA	NA	0.170001	3.75146	0	0	0.126126
sp|Q9NX58|LYAR_HUMAN	Cell growth-regulating nucleolar protein OS=Homo sapiens GN=LYAR PE=1 SV=2	6.81602	0.0191441	NA	0.0135173	NA	NA	0.795622	3.40831	0	0	0.165179
sp|P49915|GUAA_HUMAN	GMP synthase [glutamine-hydrolyzing] OS=Homo sapiens GN=GMPS PE=1 SV=1	4.29068	0.0215292	0.133801	0.0129747	0.0240083	NA	0.67315	2.06097	0.446536	0	0.209302
sp|Q14157|UBP2L_HUMAN	Ubiquitin-associated protein 2-like OS=Homo sapiens GN=UBAP2L PE=1 SV=2	4.20252	0.023055	0.0347002	0.0113471	0.159618	NA	2.17809	2.66489	1.56642	0	0.113273
sp|Q9UBT2|SAE2_HUMAN	SUMO-activating enzyme subunit 2 OS=Homo sapiens GN=UBA2 PE=1 SV=2	4.36419	0.0311186	0.105677	0.0131431	NA	NA	2.24671	4.86564	0.310137	0.168495	0.268902
sp|P12814|ACTN1_HUMAN	Alpha-actinin-1 OS=Homo sapiens GN=ACTN1 PE=1 SV=2	3.72571	0.0337186	NA	0.0110477	0.175403	0.0651285	0	3.27387	1.72206	2.12963	0.115308
sp|Q9Y295|DRG1_HUMAN	Developmentally-regulated GTP-binding protein 1 OS=Homo sapiens GN=DRG1 PE=1 SV=1	5.19471	0.037009	NA	0.0236483	NA	NA	0	2.50482	0.544384	0	0.0890012
sp|P84098|RL19_HUMAN	60S ribosomal protein L19 OS=Homo sapiens GN=RPL19 PE=1 SV=1	3.42663	0.058243	0.255145	0.0157624	NA	NA	1.17862	3.00681	0.251914	0.256309	0.188835
sp|Q9BZZ5|API5_HUMAN	Apoptosis inhibitor 5 OS=Homo sapiens GN=API5 PE=1 SV=2	3.92046	0.0655184	NA	0.0390645	NA	NA	0.428075	2.39691	0.317622	0.163635	0.13547
sp|O43447|PPIH_HUMAN	Peptidyl-prolyl cis-trans isomerase H OS=Homo sapiens GN=PPIH PE=1 SV=1	2.72946	0.079031	0.125406	0.0324977	0.0848967	NA	1.60751	2.35506	1.79784	0.215238	0.147591
sp|P00918|CAH2_HUMAN	Carbonic anhydrase 2 OS=Homo sapiens GN=CA2 PE=1 SV=2	2.61839	0.104412	0.149778	0.0354069	NA	NA	0.615366	2.76718	0.478316	0.12824	0.162302
sp|P21964|COMT_HUMAN	Catechol O-methyltransferase OS=Homo sapiens GN=COMT PE=1 SV=2	2.48272	0.115668	NA	0.0288868	0.307996	NA	0.259094	4.35857	1.20865	0	0.234433
sp|P55884|EIF3B_HUMAN	Eukaryotic translation initiation factor 3 subunit B OS=Homo sapiens GN=EIF3B PE=1 SV=3	2.28632	0.11855	0.199497	0.018681	NA	0.330078	1.78925	3.536	0.195182	0.659898	0.330363
sp|P35268|RL22_HUMAN	60S ribosomal protein L22 OS=Homo sapiens GN=RPL22 PE=1 SV=2	2.19914	0.128646	NA	0.0414125	0.394256	0.0618883	0.684001	2.90719	1.29444	2.43165	0.167168
sp|Q92608|DOCK2_HUMAN	Dedicator of cytokinesis protein 2 OS=Homo sapiens GN=DOCK2 PE=1 SV=2	1.81116	0.186503	0.47972	0.0412067	0.12125	NA	0.995639	1.74411	1.41893	0.14898	0.161903
sp|Q15393|SF3B3_HUMAN	Splicing factor 3B subunit 3 OS=Homo sapiens GN=SF3B3 PE=1 SV=4	1.67992	0.212034	0.256431	0.0309074	NA	0.402391	1.73083	3.91108	0.471943	1.07059	0.362126
sp|P49756|RBM25_HUMAN	RNA-binding protein 25 OS=Homo sapiens GN=RBM25 PE=1 SV=3	1.59005	0.231669	0.411112	0.031899	0.311467	NA	1.14065	2.54949	1.3257	0.38132	0.102403
sp|P26640|SYVC_HUMAN	Valyl-tRNA synthetase OS=Homo sapiens GN=VARS PE=1 SV=4	14.6092	3.68202e-05	0.0162089	0.268138	0.000144628	0.000134078	0.730613	1.0839	0.482769	0.441893	0.099088
sp|P17844|DDX5_HUMAN	Probable ATP-dependent RNA helicase DDX5 OS=Homo sapiens GN=DDX5 PE=1 SV=1	11.6903	0.000135154	0.0201838	0.31537	0.00112603	0.000134078	0.618243	1.1212	0.372778	0.202745	0.184448
sp|Q9NR30|DDX21_HUMAN	Nucleolar RNA helicase 2 OS=Homo sapiens GN=DDX21 PE=1 SV=5	8.63414	0.000694417	0.0238491	0.357774	0.0164773	0.000223464	0.549076	1.14883	0.500824	0.151633	0.249198
sp|Q14978|NOLC1_HUMAN	Nucleolar and coiled-body phosphoprotein 1 OS=Homo sapiens GN=NOLC1 PE=1 SV=2	7.38882	0.00150921	0.0450484	0.248494	0.0271178	0.00027933	0.683292	0.855828	0.634422	0.298154	0.200759
sp|Q9P2J5|SYLC_HUMAN	Leucyl-tRNA synthetase, cytoplasmic OS=Homo sapiens GN=LARS PE=1 SV=2	6.75984	0.00230232	0.00775629	0.337315	0.0116736	0.00160894	0.437728	0.926216	0.466967	0.307581	0.28031
sp|P14868|SYDC_HUMAN	Aspartyl-tRNA synthetase, cytoplasmic OS=Homo sapiens GN=DARS PE=1 SV=2	6.0237	0.0038871	0.0149516	0.0717025	0.016343	0.00331844	0.575519	0.712981	0.583014	0.449624	0.15375
sp|Q12931|TRAP1_HUMAN	Heat shock protein 75 kDa, mitochondrial OS=Homo sapiens GN=TRAP1 PE=1 SV=3	5.65588	0.00511618	0.0205222	0.318906	0.00846074	0.00360894	0.554278	0.886112	0.500033	0.402074	0.166839
sp|O76094|SRP72_HUMAN	Signal recognition particle 72 kDa protein OS=Homo sapiens GN=SRP72 PE=1 SV=3	5.13887	0.00764942	0.0277176	0.202357	0.0123864	0.00464804	0.347292	0.710519	0.37076	0.213748	0.191836
sp|Q9NYF8|BCLF1_HUMAN	Bcl-2-associated transcription factor 1 OS=Homo sapiens GN=BCLAF1 PE=1 SV=2	5.02954	0.00834966	0.0418375	0.057362	0.0160227	0.00656983	0.419856	0.451592	0.353957	0.220573	0.238786
sp|Q92499|DDX1_HUMAN	ATP-dependent RNA helicase DDX1 OS=Homo sapiens GN=DDX1 PE=1 SV=2	4.76007	0.0104027	0.0496228	0.246932	0.00772727	0.00693855	0.598984	0.82761	0.446873	0.3786	0.28185
sp|P05198|IF2A_HUMAN	Eukaryotic translation initiation factor 2 subunit 1 OS=Homo sapiens GN=EIF2S1 PE=1 SV=3	3.66836	0.0269808	0.0348453	0.221918	0.0175207	0.0212291	0.65719	0.842827	0.581855	0.594504	0.0837955
sp|P23381|SYWC_HUMAN	Tryptophanyl-tRNA synthetase, cytoplasmic OS=Homo sapiens GN=WARS PE=1 SV=2	27.6063	6.23767e-07	0.00410058	0.329916	3.09917e-05	4.46927e-05	1.62246	1.08807	2.70506	2.54455	0.126079
sp|Q15942|ZYX_HUMAN	Zyxin OS=Homo sapiens GN=ZYX PE=1 SV=1	26.5025	8.21255e-07	0.000116054	0.367147	0.000123967	4.46927e-05	5.08239	0.876651	5.42561	6.57438	0.118837
sp|P50552|VASP_HUMAN	Vasodilator-stimulated phosphoprotein OS=Homo sapiens GN=VASP PE=1 SV=3	21.1747	3.61654e-06	0.000203095	0.184565	0.000134298	0.000201117	7.44868	1.39765	8.72538	8.2156	0.262996
sp|Q9Y617|SERC_HUMAN	Phosphoserine aminotransferase OS=Homo sapiens GN=PSAT1 PE=1 SV=2	16.0413	2.08736e-05	0.0189942	0.0878672	0.000216942	0.000167598	1.94995	1.59187	3.62373	3.79195	0.233351
sp|P40121|CAPG_HUMAN	Macrophage-capping protein OS=Homo sapiens GN=CAPG PE=1 SV=2	16.0152	2.10836e-05	0.000696325	0.37797	0.00035124	0.000324022	4.93917	1.20841	5.81944	5.85543	0.2469
sp|P60660|MYL6_HUMAN	Myosin light polypeptide 6 OS=Homo sapiens GN=MYL6 PE=1 SV=2	14.968	3.18165e-05	0.00216634	0.112853	0.000423554	0.000324022	1.48628	1.17416	1.68904	1.70095	0.0704165
sp|P13796|PLSL_HUMAN	Plastin-2 OS=Homo sapiens GN=LCP1 PE=1 SV=6	13.5167	5.84474e-05	0.0202128	0.192657	0.000557851	0.000223464	1.21311	1.08345	1.44212	1.51926	0.097462
sp|P69905|HBA_HUMAN	Hemoglobin subunit alpha OS=Homo sapiens GN=HBA1 PE=1 SV=2	13.4404	6.0426e-05	0.00257253	0.218428	0.00329545	0.000167598	3.79345	0.859099	3.7634	6.2991	0.188403
sp|O14745|NHRF1_HUMAN	Na(+)/H(+) exchange regulatory cofactor NHE-RF1 OS=Homo sapiens GN=SLC9A3R1 PE=1 SV=4	13.0272	7.25492e-05	0.000232108	0.475229	0.00102273	0.00237989	7.89566	0.96665	6.54859	5.18899	0.217269
sp|P07602|SAP_HUMAN	Proactivator polypeptide OS=Homo sapiens GN=PSAP PE=1 SV=2	10.6152	0.00023153	0.0151838	0.0568569	0.0115496	0.000268156	1.57995	1.39211	1.62993	2.32861	0.12752
sp|P09382|LEG1_HUMAN	Galectin-1 OS=Homo sapiens GN=LGALS1 PE=1 SV=2	10.3359	0.000267935	0.00344294	0.100748	0.00403926	0.000581006	3.29652	0.603974	3.34045	4.29597	0.202029
sp|P08107|HSP71_HUMAN	Heat shock 70 kDa protein 1A/1B OS=Homo sapiens GN=HSPA1A PE=1 SV=5	9.97123	0.000325534	0.00852031	0.0670627	0.000557851	0.00511732	1.89957	1.51341	2.67068	1.98974	0.158271
sp|P20618|PSB1_HUMAN	Proteasome subunit beta type-1 OS=Homo sapiens GN=PSMB1 PE=1 SV=2	9.90731	0.000337005	0.00253385	0.0509729	0.00379132	0.00167598	2.03531	1.50212	2.02411	2.15681	0.151859
sp|P11142|HSP7C_HUMAN	Heat shock cognate 71 kDa protein OS=Homo sapiens GN=HSPA8 PE=1 SV=1	8.36503	0.000816154	0.000928433	0.387755	0.00455579	0.0102682	1.41508	1.03124	1.33279	1.2677	0.0990976
sp|P14618|KPYM_HUMAN	Pyruvate kinase isozymes M1/M2 OS=Homo sapiens GN=PKM2 PE=1 SV=4	7.90039	0.00108721	0.0258317	0.289252	0.00326446	0.0012514	1.22443	0.947517	1.35619	1.4003	0.100939
sp|P60468|SC61B_HUMAN	Protein transport protein Sec61 subunit beta OS=Homo sapiens GN=SEC61B PE=1 SV=2	7.56291	0.00134781	0.00896518	0.190898	0.0311777	0.000726257	2.48046	1.45643	2.11405	3.57261	0.097144
sp|Q13404|UB2V1_HUMAN	Ubiquitin-conjugating enzyme E2 variant 1 OS=Homo sapiens GN=UBE2V1 PE=1 SV=2	7.53553	0.00137185	0.0077176	0.285716	0.011436	0.00130726	2.94751	1.44831	2.79658	3.85698	0.144594
sp|Q15084|PDIA6_HUMAN	Protein disulfide-isomerase A6 OS=Homo sapiens GN=PDIA6 PE=1 SV=1	7.4684	0.00143288	0.0166054	0.419645	0.0411364	0.000458101	1.25251	1.02195	1.20489	1.49647	0.0798904
sp|P31949|S10AB_HUMAN	Protein S100-A11 OS=Homo sapiens GN=S100A11 PE=1 SV=2	7.39806	0.00150012	0.0366538	0.24363	0.00315083	0.00174302	1.82416	1.03013	2.95328	3.13572	0.209544
sp|Q14019|COTL1_HUMAN	Coactosin-like protein OS=Homo sapiens GN=COTL1 PE=1 SV=3	6.92181	0.00206071	0.00507737	0.0932928	0.00665289	0.0087933	1.74294	1.3301	1.74649	1.66082	0.111926
sp|Q9H299|SH3L3_HUMAN	SH3 domain-binding glutamic acid-rich-like protein 3 OS=Homo sapiens GN=SH3BGRL3 PE=1 SV=1	6.58742	0.00259508	0.00833656	0.469841	0.00958678	0.00298324	2.92498	1.08567	2.7956	3.19147	0.268054
sp|P18859|ATP5J_HUMAN	ATP synthase-coupling factor 6, mitochondrial OS=Homo sapiens GN=ATP5J PE=1 SV=1	6.56879	0.00262914	0.0432882	0.168344	0.0157128	0.00116201	3.54289	2.91459	5.07991	9.13429	0.265537
sp|P05388|RLA0_HUMAN	60S acidic ribosomal protein P0 OS=Homo sapiens GN=RPLP0 PE=1 SV=1	6.04822	0.00381777	0.0104642	0.26319	0.00338843	0.0215531	1.6418	1.16628	1.86083	1.53518	0.17039
sp|Q9NX40|OCAD1_HUMAN	OCIA domain-containing protein 1 OS=Homo sapiens GN=OCIAD1 PE=1 SV=1	5.88325	0.0043124	0.0230658	0.329925	0.00933884	0.00326257	3.36394	1.15022	4.21719	5.08194	0.225895
sp|P18085|ARF4_HUMAN	ADP-ribosylation factor 4 OS=Homo sapiens GN=ARF4 PE=1 SV=3	5.60331	0.00532509	0.0219729	0.256286	0.00974174	0.00472626	2.63687	1.67491	3.09263	3.34501	0.2299
sp|Q9H444|CHM4B_HUMAN	Charged multivesicular body protein 4b OS=Homo sapiens GN=CHMP4B PE=1 SV=1	5.51466	0.0056994	0.005706	0.190861	0.0150103	0.0152291	3.56562	1.4838	2.91132	2.73323	0.188822
sp|P80723|BASP1_HUMAN	Brain acid soluble protein 1 OS=Homo sapiens GN=BASP1 PE=1 SV=2	5.29122	0.00678068	0.042205	0.137016	0.00313017	0.0312179	1.56377	1.30604	2.04391	1.55956	0.186103
sp|Q99460|PSMD1_HUMAN	26S proteasome non-ATPase regulatory subunit 1 OS=Homo sapiens GN=PSMD1 PE=1 SV=2	4.92279	0.00910324	0.0212186	0.421132	0.0335744	0.00359777	3.0175	1.12442	2.73144	4.42517	0.193985
sp|P31946|1433B_HUMAN	14-3-3 protein beta/alpha OS=Homo sapiens GN=YWHAB PE=1 SV=3	4.82178	0.00988694	0.0465377	0.0541347	0.0126033	0.015933	1.32409	1.3057	1.45876	1.41734	0.139398
sp|P07108|ACBP_HUMAN	Acyl-CoA-binding protein OS=Homo sapiens GN=DBI PE=1 SV=2	4.81483	0.00994355	0.00680851	0.271712	0.0195868	0.0232067	1.65871	1.13149	1.53401	1.50768	0.138829
sp|P25787|PSA2_HUMAN	Proteasome subunit alpha type-2 OS=Homo sapiens GN=PSMA2 PE=1 SV=2	4.38979	0.0142071	0.0324468	0.23362	0.00923554	0.0226257	1.53475	1.17807	1.75678	1.57961	0.147832
sp|P56134|ATPK_HUMAN	ATP synthase subunit f, mitochondrial OS=Homo sapiens GN=ATP5J2 PE=1 SV=3	4.18927	0.0169006	0.0133946	0.189317	0.0195868	0.0380112	2.68657	1.33573	2.53607	2.11688	0.131799
sp|P49327|FAS_HUMAN	Fatty acid synthase OS=Homo sapiens GN=FASN PE=1 SV=3	11.3855	0.000156867	0.404652	0.110103	0.00542355	3.35196e-05	0.979813	0.877118	0.716243	0.473574	0.140357
sp|P49321|NASP_HUMAN	Nuclear autoantigenic sperm protein OS=Homo sapiens GN=NASP PE=1 SV=2	10.7618	0.000214679	0.165251	0.0733302	0.0120041	4.46927e-05	0.847715	0.766775	0.631881	0.288899	0.127949
sp|Q15459|SF3A1_HUMAN	Splicing factor 3A subunit 1 OS=Homo sapiens GN=SF3A1 PE=1 SV=1	9.36814	0.000454108	0.466228	0.335164	0.0121281	8.93855e-05	1.02164	1.07829	0.606992	0.266139	0.130249
sp|Q9NSD9|SYFB_HUMAN	Phenylalanyl-tRNA synthetase beta chain OS=Homo sapiens GN=FARSB PE=1 SV=3	8.4148	0.000791939	0.144091	0.419785	0.00594008	0.000223464	0.731974	1.06128	0.402599	0.137504	0.211029
sp|Q16543|CDC37_HUMAN	Hsp90 co-chaperone Cdc37 OS=Homo sapiens GN=CDC37 PE=1 SV=1	7.22436	0.00168188	0.112427	0.190842	0.00842975	0.000446927	0.708099	0.78099	0.47901	0.194868	0.186392
sp|O60610|DIAP1_HUMAN	Protein diaphanous homolog 1 OS=Homo sapiens GN=DIAPH1 PE=1 SV=2	6.13495	0.00358348	0.224381	0.305603	0.015031	0.000681564	0.871091	0.910814	0.639532	0.396515	0.187387
sp|O95373|IPO7_HUMAN	Importin-7 OS=Homo sapiens GN=IPO7 PE=1 SV=1	5.83745	0.00446219	0.184458	0.270702	0.0118285	0.000905028	0.870255	1.12082	0.634696	0.46141	0.132236
sp|P30566|PUR8_HUMAN	Adenylosuccinate lyase OS=Homo sapiens GN=ADSL PE=1 SV=2	5.00047	0.00854772	0.110735	0.281254	0.00621901	0.00392179	0.768711	0.873151	0.421528	0.370499	0.26554
sp|P16989|DBPA_HUMAN	DNA-binding protein A OS=Homo sapiens GN=CSDA PE=1 SV=4	4.65071	0.0113924	0.136779	0.466679	0.00795455	0.004	0.799874	1.01965	0.557824	0.492234	0.122941
sp|P23588|IF4B_HUMAN	Eukaryotic translation initiation factor 4B OS=Homo sapiens GN=EIF4B PE=1 SV=2	4.45802	0.0134026	0.14146	0.129457	0.0310124	0.00269274	0.672937	0.625423	0.468797	0.241565	0.359275
sp|O43809|CPSF5_HUMAN	Cleavage and polyadenylation specificity factor subunit 5 OS=Homo sapiens GN=NUDT21 PE=1 SV=1	4.43638	0.0136521	0.442205	0.355631	0.0143698	0.00244693	1.03926	0.951243	0.56433	0.423628	0.167311
sp|P39023|RL3_HUMAN	60S ribosomal protein L3 OS=Homo sapiens GN=RPL3 PE=1 SV=2	4.42085	0.0138344	0.0718569	0.188082	0.0123657	0.00656983	0.55036	0.702652	0.465764	0.262176	0.227922
sp|O75643|U520_HUMAN	U5 small nuclear ribonucleoprotein 200 kDa helicase OS=Homo sapiens GN=SNRNP200 PE=1 SV=2	4.25158	0.0160071	0.196625	0.143835	0.0130372	0.00557542	0.790893	1.36638	0.483594	0.387428	0.301283
sp|P30520|PURA2_HUMAN	Adenylosuccinate synthetase isozyme 2 OS=Homo sapiens GN=ADSS PE=1 SV=3	3.92019	0.0214536	0.064265	0.417119	0.00424587	0.0333408	0.586299	0.947658	0.254416	0.438502	0.232475
sp|P05455|LA_HUMAN	Lupus La protein OS=Homo sapiens GN=SSB PE=1 SV=2	3.90561	0.0217369	0.361518	0.37218	0.0474587	0.00210056	0.960215	1.04619	0.775377	0.587164	0.0973043
sp|P40227|TCPZ_HUMAN	T-complex protein 1 subunit zeta OS=Homo sapiens GN=CCT6A PE=1 SV=3	3.83617	0.0231437	0.057118	0.179878	0.039845	0.00660335	0.785092	0.873279	0.770545	0.644009	0.188173
sp|Q9Y2W1|TR150_HUMAN	Thyroid hormone receptor-associated protein 3 OS=Homo sapiens GN=THRAP3 PE=1 SV=2	3.82617	0.0233546	0.505106	0.110215	0.0129545	0.00861453	1.0305	0.532947	0.320391	0.284893	0.196379
sp|O75533|SF3B1_HUMAN	Splicing factor 3B subunit 1 OS=Homo sapiens GN=SF3B1 PE=1 SV=3	2.97501	0.0523353	0.283781	0.1887	0.027562	0.0126257	0.872226	1.22304	0.603749	0.534365	0.320134
sp|P01889|1B07_HUMAN	HLA class I histocompatibility antigen, B-7 alpha chain OS=Homo sapiens GN=HLA-B PE=1 SV=3	2.93756	0.0543154	0.397718	0.175978	0.0100517	0.0342793	0.948192	0.823441	0.500187	0.60656	0.166716
sp|P99999|CYC_HUMAN	Cytochrome c OS=Homo sapiens GN=CYCS PE=1 SV=2	2.92019	0.0552622	0.154052	0.245061	0.0440083	0.0108492	0.860355	1.12332	0.73153	0.633902	0.140909
sp|Q6P2Q9|PRP8_HUMAN	Pre-mRNA-processing-splicing factor 8 OS=Homo sapiens GN=PRPF8 PE=1 SV=2	2.89628	0.0565945	0.0888491	0.395454	0.0426136	0.0130838	0.712696	1.11455	0.63071	0.495612	0.298531
sp|P38919|IF4A3_HUMAN	Eukaryotic initiation factor 4A-III OS=Homo sapiens GN=EIF4A3 PE=1 SV=4	2.79937	0.0623694	0.377418	0.371216	0.048905	0.00740782	0.937052	0.928999	0.664382	0.507179	0.124408
sp|Q96QK1|VPS35_HUMAN	Vacuolar protein sorting-associated protein 35 OS=Homo sapiens GN=VPS35 PE=1 SV=2	2.76126	0.0648155	0.133762	0.407605	0.0441942	0.0121117	0.763711	1.10804	0.625066	0.490014	0.257979
sp|Q9NXG2|THUM1_HUMAN	THUMP domain-containing protein 1 OS=Homo sapiens GN=THUMPD1 PE=1 SV=2	2.64589	0.0728853	0.414304	0.254537	0.0179339	0.0239888	0.97987	0.805547	0.431676	0.448427	0.09458
sp|Q15046|SYK_HUMAN	Lysyl-tRNA synthetase OS=Homo sapiens GN=KARS PE=1 SV=3	2.60647	0.0758903	0.0578917	0.354191	0.0358678	0.0352179	0.705494	1.09676	0.65332	0.655855	0.147915
sp|Q16630|CPSF6_HUMAN	Cleavage and polyadenylation specificity factor subunit 6 OS=Homo sapiens GN=CPSF6 PE=1 SV=2	2.55595	0.0799413	0.195774	0.247624	0.0398347	0.0173296	0.81403	0.828701	0.611894	0.483787	0.211982
sp|Q8WXF1|PSPC1_HUMAN	Paraspeckle component 1 OS=Homo sapiens GN=PSPC1 PE=1 SV=1	2.38404	0.0955982	0.353511	0.437484	0.0476963	0.0132514	1.225	1.10547	0.457342	0.367851	0.209295
sp|P00441|SODC_HUMAN	Superoxide dismutase [Cu-Zn] OS=Homo sapiens GN=SOD1 PE=1 SV=2	2.04451	0.137238	0.359749	0.28637	0.0283161	0.0431844	0.834717	0.819385	0.362135	0.435159	0.218936
sp|P19338|NUCL_HUMAN	Nucleolin OS=Homo sapiens GN=NCL PE=1 SV=3	6.69538	0.0024072	0.0318279	0.0842283	0.0632541	0.000636872	0.78857	0.837477	0.823065	0.566355	0.175366
sp|P60842|IF4A1_HUMAN	Eukaryotic initiation factor 4A-I OS=Homo sapiens GN=EIF4A1 PE=1 SV=1	6.25645	0.0032819	0.0155222	0.298812	0.0707645	0.00073743	0.548362	1.15841	0.669757	0.276742	0.245915
sp|A6NKZ8|YI016_HUMAN	Putative tubulin beta chain-like protein ENSP00000290377 OS=Homo sapiens PE=5 SV=2	4.69976	0.010936	0.0333075	0.152666	0.290083	0.00146369	0.619863	0.781971	0.880413	0.370906	0.18477
sp|O00429|DNM1L_HUMAN	Dynamin-1-like protein OS=Homo sapiens GN=DNM1L PE=1 SV=2	4.63033	0.0115882	0.0194874	0.379616	0.0945868	0.00242458	0.505049	1.08644	0.693787	0.323571	0.175193
sp|P60228|EIF3E_HUMAN	Eukaryotic translation initiation factor 3 subunit E OS=Homo sapiens GN=EIF3E PE=1 SV=1	4.05871	0.0189591	0.00768859	0.0606642	0.206674	0.0178436	0.597955	1.32908	0.863575	0.632946	0.145042
sp|P63279|UBC9_HUMAN	SUMO-conjugating enzyme UBC9 OS=Homo sapiens GN=UBE2I PE=1 SV=1	3.26407	0.0394772	0.012118	0.0526193	0.198461	0.0476425	0.38147	0.447528	0.668655	0.408435	0.17677
sp|P07814|SYEP_HUMAN	Bifunctional aminoacyl-tRNA synthetase OS=Homo sapiens GN=EPRS PE=1 SV=5	2.13904	0.123964	0.0459478	0.40695	0.182882	0.0250838	0.726715	0.966035	0.86109	0.669258	0.204007
sp|P52272|HNRPM_HUMAN	Heterogeneous nuclear ribonucleoprotein M OS=Homo sapiens GN=HNRNPM PE=1 SV=3	5.10746	0.0078436	0.0497292	0.456239	0.420661	0.000726257	1.38061	1.07472	1.04953	0.358268	0.256163
sp|P35637|FUS_HUMAN	RNA-binding protein FUS OS=Homo sapiens GN=FUS PE=1 SV=1	4.03695	0.0193287	0.040619	0.303732	0.465723	0.00213408	1.36929	0.894971	0.989146	0.463593	0.165233
sp|P12004|PCNA_HUMAN	Proliferating cell nuclear antigen OS=Homo sapiens GN=PCNA PE=1 SV=1	3.86172	0.0226146	0.0230658	0.0582133	0.208037	0.0109721	1.50161	1.42572	1.19223	0.548745	0.190711
sp|Q14974|IMB1_HUMAN	Importin subunit beta-1 OS=Homo sapiens GN=KPNB1 PE=1 SV=2	2.69524	0.0693059	0.0457544	0.434415	0.0989773	0.0186816	1.25012	1.03731	1.18787	0.726524	0.151947
sp|P51991|ROA3_HUMAN	Heterogeneous nuclear ribonucleoprotein A3 OS=Homo sapiens GN=HNRNPA3 PE=1 SV=2	4.40447	0.0140295	0.49175	0.315557	0.0300103	0.00181006	1.00745	0.940687	1.32603	0.560349	0.139522
sp|P48595|SPB10_HUMAN	Serpin B10 OS=Homo sapiens GN=SERPINB10 PE=1 SV=1	18.5443	8.45794e-06	0.00651838	0.321703	0.000495868	0	0.619651	0.931829	0.476502	0.210243	0.184472
sp|P22102|PUR2_HUMAN	Trifunctional purine biosynthetic protein adenosine-3 OS=Homo sapiens GN=GART PE=1 SV=1	18.4726	8.66759e-06	0.00525145	0.0970814	0.00270661	0	0.531143	0.754178	0.480226	0.103955	0.140941
sp|P50416|CPT1A_HUMAN	Carnitine O-palmitoyltransferase 1, liver isoform OS=Homo sapiens GN=CPT1A PE=1 SV=2	2.77515	0.0639119	0.0187718	0.263424	0.0171488	0.361944	0.279608	1.34934	0.370927	0.9382	0.215107
sp|Q96A33|CCD47_HUMAN	Coiled-coil domain-containing protein 47 OS=Homo sapiens GN=CCDC47 PE=1 SV=1	2.55953	0.0796464	0.0380658	0.137222	0.0172107	0.473631	0.499675	0.577766	0.315287	0.970838	0.241068
sp|Q16531|DDB1_HUMAN	DNA damage-binding protein 1 OS=Homo sapiens GN=DDB1 PE=1 SV=1	2.1111	0.127737	0.0401547	0.423845	0.048843	0.0947151	0.461664	1.20602	0.355864	0.436793	0.223695
sp|P07339|CATD_HUMAN	Cathepsin D OS=Homo sapiens GN=CTSD PE=1 SV=1	84.4355	2.07673e-10	1.93424e-05	0.252591	1.03306e-05	0	4.69726	1.27715	6.54327	13.4191	0.167726
sp|P35579|MYH9_HUMAN	Myosin-9 OS=Homo sapiens GN=MYH9 PE=1 SV=4	78.9263	3.43194e-10	3.86847e-05	0.461674	1.03306e-05	0	1.37533	1.00747	1.53294	2.04789	0.0535566
sp|P52209|6PGD_HUMAN	6-phosphogluconate dehydrogenase, decarboxylating OS=Homo sapiens GN=PGD PE=1 SV=3	37.8276	7.10079e-08	0.000222437	0.229093	3.09917e-05	0	2.17127	1.17678	2.90342	3.38791	0.15496
sp|P08133|ANXA6_HUMAN	Annexin A6 OS=Homo sapiens GN=ANXA6 PE=1 SV=3	36.7666	8.66908e-08	0.000203095	0.345744	0.000113636	0	1.74437	0.94523	1.87444	2.60159	0.105721
sp|P84095|RHOG_HUMAN	Rho-related GTP-binding protein RhoG OS=Homo sapiens GN=RHOG PE=1 SV=1	5.79072	0.00462107	0.00334623	0.269233	0.00349174	0.218402	2.60855	1.33512	2.71952	1.35496	0.135325
sp|P30626|SORCN_HUMAN	Sorcin OS=Homo sapiens GN=SRI PE=1 SV=1	4.75602	0.0104376	0.0172631	0.0984939	0.00417355	0.244816	2.68084	1.82455	3.43441	1.36287	0.138269
sp|P39019|RS19_HUMAN	40S ribosomal protein S19 OS=Homo sapiens GN=RPS19 PE=1 SV=2	4.03032	0.0194429	0.0103191	0.374481	0.0178926	0.0553184	1.57836	1.06634	1.52508	1.3488	0.142964
sp|P54920|SNAA_HUMAN	Alpha-soluble NSF attachment protein OS=Homo sapiens GN=NAPA PE=1 SV=3	3.72655	0.0255756	0.00755319	0.136642	0.0366012	0.129006	3.45245	1.8224	2.5329	1.81765	0.24555
sp|P42677|RS27_HUMAN	40S ribosomal protein S27 OS=Homo sapiens GN=RPS27 PE=1 SV=3	3.1777	0.0429099	0.0319632	0.119289	0.0332231	0.0711061	1.93821	1.40913	1.97771	1.58899	0.144612
sp|P04632|CPNS1_HUMAN	Calpain small subunit 1 OS=Homo sapiens GN=CAPNS1 PE=1 SV=1	2.30023	0.104417	0.130745	0.131852	0.0481508	0.0431955	0.597897	0.576102	0.362682	1.80317	0.17538
sp|Q99623|PHB2_HUMAN	Prohibitin-2 OS=Homo sapiens GN=PHB2 PE=1 SV=2	2.62838	0.0742036	0.0269342	0.380973	0.208048	0.0172179	0.486091	0.882953	0.724794	2.22905	0.264969
sp|P38606|VATA_HUMAN	V-type proton ATPase catalytic subunit A OS=Homo sapiens GN=ATP6V1A PE=1 SV=2	7.23896	0.00166569	0.0397582	0.353564	0.0640909	0.000346369	1.96469	0.822941	1.87967	4.18753	0.184826
sp|P18206|VINC_HUMAN	Vinculin OS=Homo sapiens GN=VCL PE=1 SV=4	6.91345	0.00207246	0.00676015	0.0887746	0.0636674	0.00134078	1.84742	0.640659	1.45237	2.19494	0.208383
sp|P27824|CALX_HUMAN	Calnexin OS=Homo sapiens GN=CANX PE=1 SV=2	5.99588	0.00396747	0.0198936	0.0648644	0.062531	0.00186592	1.31988	1.22141	1.23145	1.50889	0.129851
sp|Q86UX7|URP2_HUMAN	Fermitin family homolog 3 OS=Homo sapiens GN=FERMT3 PE=1 SV=1	3.77449	0.0244786	0.0104642	0.208138	0.0547211	0.0324581	1.97723	1.29346	1.70754	1.70509	0.23466
sp|P48556|PSMD8_HUMAN	26S proteasome non-ATPase regulatory subunit 8 OS=Homo sapiens GN=PSMD8 PE=1 SV=2	3.75126	0.0250035	0.00749516	0.374013	0.0979752	0.022838	4.65901	1.14189	2.29795	3.51859	0.208314
sp|P62310|LSM3_HUMAN	U6 snRNA-associated Sm-like protein LSm3 OS=Homo sapiens GN=LSM3 PE=1 SV=2	3.34789	0.0364343	0.0281238	0.058391	0.0710744	0.0488492	1.90087	1.72572	1.69225	1.73429	0.0966307
sp|P61326|MGN_HUMAN	Protein mago nashi homolog OS=Homo sapiens GN=MAGOH PE=1 SV=1	2.66126	0.0717492	0.0307253	0.308335	0.0745661	0.0428715	2.59189	1.55823	2.05577	2.34469	0.19242
sp|Q92597|NDRG1_HUMAN	Protein NDRG1 OS=Homo sapiens GN=NDRG1 PE=1 SV=1	1.92972	0.155445	0.0437524	0.383218	0.359463	0.0341341	1.72561	0.865128	1.10451	1.74001	0.128576
sp|Q9Y4L1|HYOU1_HUMAN	Hypoxia up-regulated protein 1 OS=Homo sapiens GN=HYOU1 PE=1 SV=1	14.1501	4.45639e-05	0.460106	0.367979	0.0162603	3.35196e-05	0.990856	0.962907	1.41688	2.36439	0.161594
sp|P26038|MOES_HUMAN	Moesin OS=Homo sapiens GN=MSN PE=1 SV=3	10.8673	0.0002034	0.0787718	0.18666	0.000299587	0.00103911	1.15608	0.91283	1.53578	1.41758	0.0952494
sp|P23284|PPIB_HUMAN	Peptidyl-prolyl cis-trans isomerase B OS=Homo sapiens GN=PPIB PE=1 SV=2	10.2936	0.000273989	0.394487	0.278335	0.00397727	0.000167598	0.963381	0.915536	1.56773	1.97096	0.110984
sp|P00367|DHE3_HUMAN	Glutamate dehydrogenase 1, mitochondrial OS=Homo sapiens GN=GLUD1 PE=1 SV=2	9.40394	0.00044505	0.0585203	0.210889	0.00905992	0.00027933	1.43668	1.17942	1.79522	2.65262	0.193512
sp|P14625|ENPL_HUMAN	Endoplasmin OS=Homo sapiens GN=HSP90B1 PE=1 SV=1	8.89073	0.000597063	0.10236	0.0810664	0.0329442	0.000223464	1.12859	1.14747	1.2015	1.53343	0.080082
sp|Q9UNF0|PACN2_HUMAN	Protein kinase C and casein kinase substrate in neurons protein 2 OS=Homo sapiens GN=PACSIN2 PE=1 SV=2	8.04477	0.00099343	0.0964507	0.14072	0.00240702	0.00103911	1.49045	1.37101	2.53678	2.71644	0.154147
sp|P49257|LMAN1_HUMAN	Protein ERGIC-53 OS=Homo sapiens GN=LMAN1 PE=1 SV=2	7.34108	0.00155719	0.278675	0.145173	0.0133781	0.000424581	1.20563	1.40694	2.08642	3.16611	0.170598
sp|Q9NUQ9|FA49B_HUMAN	Protein FAM49B OS=Homo sapiens GN=FAM49B PE=1 SV=1	6.99204	0.00196489	0.0981431	0.0669504	0.011312	0.000938547	1.79665	0.54631	2.74636	4.03574	0.214686
sp|P60709|ACTB_HUMAN	Actin, cytoplasmic 1 OS=Homo sapiens GN=ACTB PE=1 SV=1	6.9662	0.00199955	0.0566248	0.227044	0.0016219	0.0043352	1.20315	0.918676	1.49168	1.37407	0.146907
sp|Q14697|GANAB_HUMAN	Neutral alpha-glucosidase AB OS=Homo sapiens GN=GANAB PE=1 SV=3	6.7761	0.00227669	0.151731	0.166455	0.0414463	0.000424581	1.131	1.13073	1.23866	1.59961	0.107733
sp|P36543|VATE1_HUMAN	V-type proton ATPase subunit E 1 OS=Homo sapiens GN=ATP6V1E1 PE=1 SV=1	6.60239	0.00256807	0.179139	0.413274	0.0361983	0.000413408	1.67285	1.46741	2.98779	8.28549	0.177616
sp|P29401|TKT_HUMAN	Transketolase OS=Homo sapiens GN=TKT PE=1 SV=3	6.54591	0.00267166	0.271441	0.401272	0.0424483	0.000368715	1.05068	0.977575	1.16197	1.41386	0.0635063
sp|O43852|CALU_HUMAN	Calumenin OS=Homo sapiens GN=CALU PE=1 SV=2	6.26879	0.00325289	0.292234	0.225089	0.0227169	0.00052514	1.04005	0.384217	2.13255	4.18023	0.286023
sp|P48047|ATPO_HUMAN	ATP synthase subunit O, mitochondrial OS=Homo sapiens GN=ATP5O PE=1 SV=1	5.84539	0.00443582	0.458298	0.113798	0.00714876	0.00184358	1.05119	0.645746	2.90175	3.47749	0.197499
sp|P43490|NAMPT_HUMAN	Nicotinamide phosphoribosyltransferase OS=Homo sapiens GN=NAMPT PE=1 SV=1	5.79923	0.00459169	0.173327	0.220037	0.0315083	0.000782123	0.514495	1.71758	2.86964	5.92769	0.276748
sp|P61158|ARP3_HUMAN	Actin-related protein 3 OS=Homo sapiens GN=ACTR3 PE=1 SV=3	5.12522	0.00773312	0.0989362	0.436913	0.0160744	0.00223464	1.18549	0.979808	1.34813	1.507	0.0962757
sp|P54709|AT1B3_HUMAN	Sodium/potassium-transporting ATPase subunit beta-3 OS=Homo sapiens GN=ATP1B3 PE=1 SV=1	5.09928	0.00789511	0.133762	0.100617	0.0401963	0.00176536	1.47642	1.59715	1.81672	2.70318	0.149698
sp|P07900|HS90A_HUMAN	Heat shock protein HSP 90-alpha OS=Homo sapiens GN=HSP90AA1 PE=1 SV=5	4.8687	0.0095139	0.188375	0.447727	0.00831612	0.00339665	1.08158	0.983088	1.26774	1.30611	0.103092
sp|Q92882|OSTF1_HUMAN	Osteoclast-stimulating factor 1 OS=Homo sapiens GN=OSTF1 PE=1 SV=2	4.68058	0.011112	0.127437	0.172329	0.015186	0.00403352	1.41715	1.34338	1.98003	2.21242	0.0896807
sp|P49588|SYAC_HUMAN	Alanyl-tRNA synthetase, cytoplasmic OS=Homo sapiens GN=AARS PE=1 SV=2	4.6691	0.0112188	0.209497	0.0773807	0.0440909	0.00235754	0.866567	0.760412	1.37983	1.73899	0.188095
sp|A5A3E0|POTEF_HUMAN	POTE ankyrin domain family member F OS=Homo sapiens GN=POTEF PE=1 SV=2	4.36433	0.0145209	0.0801257	0.474565	0.00543388	0.0195419	1.27554	1.03374	1.61809	1.43798	0.196167
contam_gi|1082558|pir||S41161	keratin 9, cytoskeletal - human gi|435476 (Z29074) cytokeratin 9 [Homo sapiens]	4.21778	0.0164851	0.108985	0.434864	0.00607438	0.0165698	2.81952	2.00527	6.00782	4.30888	0.463914
sp|P84090|ERH_HUMAN	Enhancer of rudimentary homolog OS=Homo sapiens GN=ERH PE=1 SV=1	4.07352	0.0187122	0.291731	0.0946399	0.00716942	0.0196648	1.28861	0.63624	2.90528	2.37055	0.161703
sp|P23193|TCEA1_HUMAN	Transcription elongation factor A protein 1 OS=Homo sapiens GN=TCEA1 PE=1 SV=2	4.03134	0.0194253	0.430561	0.333798	0.01125	0.00548603	0.871262	1.0357	4.63428	5.40385	0.232833
sp|P13645|K1C10_HUMAN	Keratin, type I cytoskeletal 10 OS=Homo sapiens GN=KRT10 PE=1 SV=6	3.73823	0.0253033	0.0515474	0.0869224	0.0177479	0.0409609	16.2571	14.7067	21.9145	12.1206	0.976212
sp|P58546|MTPN_HUMAN	Myotrophin OS=Homo sapiens GN=MTPN PE=1 SV=2	3.62993	0.027956	0.117273	0.104453	0.0175517	0.022067	1.67914	1.72843	2.48398	2.28995	0.203842
sp|P54577|SYYC_HUMAN	Tyrosyl-tRNA synthetase, cytoplasmic OS=Homo sapiens GN=YARS PE=1 SV=4	3.60738	0.0285464	0.10794	0.135098	0.0104959	0.037095	1.23999	1.21348	1.51099	1.35335	0.132396
sp|P20645|MPRD_HUMAN	Cation-dependent mannose-6-phosphate receptor OS=Homo sapiens GN=M6PR PE=1 SV=1	3.55258	0.0300395	0.0691876	0.385819	0.0233471	0.0130391	1.4092	1.08955	1.58667	1.64703	0.11185
sp|P00558|PGK1_HUMAN	Phosphoglycerate kinase 1 OS=Homo sapiens GN=PGK1 PE=1 SV=3	2.94016	0.0541753	0.181547	0.0838634	0.0315083	0.0332737	1.11105	1.17832	1.26601	1.24221	0.144732
sp|O00299|CLIC1_HUMAN	Chloride intracellular channel protein 1 OS=Homo sapiens GN=CLIC1 PE=1 SV=4	2.85069	0.0592343	0.0557834	0.360412	0.0351963	0.0334078	1.50611	1.14488	1.5957	1.57589	0.231063
sp|O60763|USO1_HUMAN	General vesicular transport factor p115 OS=Homo sapiens GN=USO1 PE=1 SV=2	2.63776	0.0734941	0.223714	0.14232	0.0326963	0.0317654	1.46711	1.99022	2.45182	2.37018	0.217041
sp|P28070|PSB4_HUMAN	Proteasome subunit beta type-4 OS=Homo sapiens GN=PSMB4 PE=1 SV=4	2.59227	0.0770058	0.163646	0.338765	0.0225517	0.0348603	0.782752	0.892498	1.71445	1.61902	0.179428
sp|P62258|1433E_HUMAN	14-3-3 protein epsilon OS=Homo sapiens GN=YWHAE PE=1 SV=1	2.37676	0.0963304	0.154391	0.282881	0.043874	0.0303687	1.22802	1.11401	1.4441	1.45541	0.199779
sp|P26583|HMGB2_HUMAN	High mobility group protein B2 OS=Homo sapiens GN=HMGB2 PE=1 SV=2	2.31456	0.102848	0.271074	0.450374	0.029845	0.0314078	1.12479	1.02398	1.46507	1.40607	0.170241
sp|P13693|TCTP_HUMAN	Translationally-controlled tumor protein OS=Homo sapiens GN=TPT1 PE=1 SV=1	2.29935	0.104514	0.131315	0.450168	0.0331508	0.0455419	1.56127	1.13746	2.48824	2.21485	0.174663
sp|Q15233|NONO_HUMAN	Non-POU domain-containing octamer-binding protein OS=Homo sapiens GN=NONO PE=1 SV=4	9.07766	0.00053579	0.488801	0.306745	0.0992975	4.46927e-05	1.01006	1.08798	0.819028	0.333421	0.159429
sp|Q7KZF4|SND1_HUMAN	Staphylococcal nuclease domain-containing protein 1 OS=Homo sapiens GN=SND1 PE=1 SV=1	8.30505	0.00084645	0.219778	0.202105	0.292841	6.70391e-05	1.10691	1.11675	0.940795	0.421189	0.148123
sp|Q13263|TIF1B_HUMAN	Transcription intermediary factor 1-beta OS=Homo sapiens GN=TRIM28 PE=1 SV=5	7.31034	0.00158899	0.483046	0.370187	0.11969	0.000134078	1.01403	1.06514	0.807268	0.307547	0.172594
sp|P39748|FEN1_HUMAN	Flap endonuclease 1 OS=Homo sapiens GN=FEN1 PE=1 SV=1	7.24743	0.00165638	0.457128	0.333798	0.198409	0.000134078	1.05055	0.89872	0.827178	0.161457	0.181928
sp|Q13148|TADBP_HUMAN	TAR DNA-binding protein 43 OS=Homo sapiens GN=TARDBP PE=1 SV=1	7.12357	0.00179862	0.459139	0.408522	0.40405	0.000134078	0.969701	1.05757	0.93408	0.146008	0.162489
sp|Q9NZI8|IF2B1_HUMAN	Insulin-like growth factor 2 mRNA-binding protein 1 OS=Homo sapiens GN=IGF2BP1 PE=1 SV=2	6.5493	0.00266531	0.202205	0.184846	0.375847	0.000212291	0.792505	0.758371	0.936052	0.116673	0.226882
sp|A6NHR9|SMHD1_HUMAN	Structural maintenance of chromosomes flexible hinge domain-containing protein 1 OS=Homo sapiens GN=SMCHD1 PE=1 SV=2	6.54028	0.00268225	0.238453	0.141272	0.0990496	0.000234637	0.856055	0.775802	0.755577	0.254078	0.118226
sp|P22626|ROA2_HUMAN	Heterogeneous nuclear ribonucleoproteins A2/B1 OS=Homo sapiens GN=HNRNPA2B1 PE=1 SV=2	6.25592	0.00328315	0.116277	0.15521	0.146477	0.000290503	0.85615	0.873912	0.869628	0.512577	0.150822
sp|P31942|HNRH3_HUMAN	Heterogeneous nuclear ribonucleoprotein H3 OS=Homo sapiens GN=HNRNPH3 PE=1 SV=2	5.91754	0.00420395	0.259439	0.502488	0.182882	0.00024581	0.842926	0.995762	0.805121	0.183754	0.162012
sp|Q15056|IF4H_HUMAN	Eukaryotic translation initiation factor 4H OS=Homo sapiens GN=EIF4H PE=1 SV=5	5.70055	0.00494587	0.368308	0.331815	0.185031	0.000268156	0.93125	0.909112	0.839199	0.26664	0.154004
sp|P11940|PABP1_HUMAN	Polyadenylate-binding protein 1 OS=Homo sapiens GN=PABPC1 PE=1 SV=2	5.25884	0.00695567	0.211847	0.299944	0.140248	0.000536313	0.880962	0.91889	0.839777	0.459194	0.172066
sp|P11586|C1TC_HUMAN	C-1-tetrahydrofolate synthase, cytoplasmic OS=Homo sapiens GN=MTHFD1 PE=1 SV=3	4.64299	0.0114661	0.190745	0.318307	0.367159	0.000726257	1.13918	1.07332	0.951464	0.472054	0.119184
sp|Q9UHX1|PUF60_HUMAN	Poly(U)-binding-splicing factor PUF60 OS=Homo sapiens GN=PUF60 PE=1 SV=1	4.55266	0.0123697	0.185387	0.425154	0.0508058	0.00122905	0.735052	0.960121	0.553861	0.221724	0.178551
sp|P12956|XRCC6_HUMAN	X-ray repair cross-complementing protein 6 OS=Homo sapiens GN=XRCC6 PE=1 SV=2	4.24736	0.0160659	0.141731	0.284284	0.174979	0.00115084	0.921567	0.957967	0.930555	0.734216	0.0559468
sp|Q04637|IF4G1_HUMAN	Eukaryotic translation initiation factor 4 gamma 1 OS=Homo sapiens GN=EIF4G1 PE=1 SV=4	4.20692	0.0166421	0.282573	0.359205	0.156622	0.000994413	1.21882	1.14376	0.720953	0.204801	0.192277
sp|P61978|HNRPK_HUMAN	Heterogeneous nuclear ribonucleoprotein K OS=Homo sapiens GN=HNRNPK PE=1 SV=1	4.18598	0.0169494	0.131489	0.0577175	0.0700103	0.00368715	0.901141	0.848211	0.858313	0.719315	0.105552
sp|Q15637|SF01_HUMAN	Splicing factor 1 OS=Homo sapiens GN=SF1 PE=1 SV=4	3.95651	0.020766	0.431219	0.272161	0.309473	0.00102793	1.0312	0.870437	0.890992	0.36363	0.167374
sp|O00571|DDX3X_HUMAN	ATP-dependent RNA helicase DDX3X OS=Homo sapiens GN=DDX3X PE=1 SV=3	3.88975	0.0220496	0.156576	0.281141	0.143275	0.00176536	0.841522	1.10349	1.2106	0.492633	0.122491
sp|Q9Y285|SYFA_HUMAN	Phenylalanyl-tRNA synthetase alpha chain OS=Homo sapiens GN=FARSA PE=1 SV=3	3.86752	0.0224963	0.0652805	0.4758	0.121498	0.00248045	0.721801	1.03635	0.768728	0.421096	0.150665
sp|Q13283|G3BP1_HUMAN	Ras GTPase-activating protein-binding protein 1 OS=Homo sapiens GN=G3BP1 PE=1 SV=1	3.77527	0.0244613	0.353675	0.094565	0.12593	0.00250279	0.945277	1.2563	0.822094	0.507493	0.120924
sp|Q9Y383|LC7L2_HUMAN	Putative RNA-binding protein Luc7-like 2 OS=Homo sapiens GN=LUC7L2 PE=1 SV=2	3.74867	0.0250629	0.396644	0.0871094	0.0568698	0.00388827	0.913986	0.662265	0.56098	0.273546	0.251854
sp|Q15029|U5S1_HUMAN	116 kDa U5 small nuclear ribonucleoprotein component OS=Homo sapiens GN=EFTUD2 PE=1 SV=1	3.45231	0.0330013	0.0758994	0.392928	0.0619421	0.00528492	0.668712	1.15339	0.55394	0.270995	0.333882
sp|P31689|DNJA1_HUMAN	DnaJ homolog subfamily A member 1 OS=Homo sapiens GN=DNAJA1 PE=1 SV=2	3.26599	0.0394044	0.390619	0.2429	0.0521384	0.00464804	1.15039	1.39558	0.431925	0.237949	0.222845
sp|Q08211|DHX9_HUMAN	ATP-dependent RNA helicase A OS=Homo sapiens GN=DHX9 PE=1 SV=4	3.24625	0.0401598	0.458704	0.0842844	0.0537397	0.0077095	1.04495	1.51567	0.601438	0.409825	0.27337
sp|Q86V81|THOC4_HUMAN	THO complex subunit 4 OS=Homo sapiens GN=THOC4 PE=1 SV=3	3.13928	0.0445415	0.169836	0.309074	0.299039	0.00282682	0.837095	0.909	1.12579	0.493138	0.157289
sp|Q9BY32|ITPA_HUMAN	Inosine triphosphate pyrophosphatase OS=Homo sapiens GN=ITPA PE=1 SV=2	3.13649	0.0446627	0.334004	0.422152	0.153781	0.00267039	0.880508	0.980888	0.727897	0.227953	0.186783
sp|Q13813|SPTA2_HUMAN	Spectrin alpha chain, brain OS=Homo sapiens GN=SPTAN1 PE=1 SV=3	2.74585	0.0658345	0.243733	0.0913096	0.437076	0.00640223	1.19436	0.686626	0.955106	0.385103	0.182606
sp|P26599|PTBP1_HUMAN	Polypyrimidine tract-binding protein 1 OS=Homo sapiens GN=PTBP1 PE=1 SV=1	2.72693	0.0671093	0.052205	0.319401	0.100775	0.0137095	0.81903	1.06618	0.854687	0.737797	0.12492
sp|Q92922|SMRC1_HUMAN	SWI/SNF complex subunit SMARCC1 OS=Homo sapiens GN=SMARCC1 PE=1 SV=3	2.66078	0.0717848	0.501364	0.262769	0.150331	0.00512849	1.02791	1.2626	0.705769	0.316527	0.195724
sp|P62753|RS6_HUMAN	40S ribosomal protein S6 OS=Homo sapiens GN=RPS6 PE=1 SV=1	2.63553	0.0736622	0.160184	0.20942	0.18311	0.0070838	0.744826	0.804067	0.750767	0.322239	0.197225
sp|Q99417|MYCBP_HUMAN	C-Myc-binding protein OS=Homo sapiens GN=MYCBP PE=1 SV=3	2.60722	0.0758318	0.0724952	0.300215	0.117118	0.0121117	0.669981	0.85884	0.661603	0.384403	0.156638
sp|P23246|SFPQ_HUMAN	Splicing factor, proline- and glutamine-rich OS=Homo sapiens GN=SFPQ PE=1 SV=2	2.47851	0.0866176	0.348308	0.190496	0.212531	0.00659218	1.06288	0.892021	0.892017	0.638945	0.178066
sp|P36578|RL4_HUMAN	60S ribosomal protein L4 OS=Homo sapiens GN=RPL4 PE=1 SV=5	2.44422	0.0897661	0.369729	0.0784097	0.221591	0.0105251	0.901684	0.577227	0.758339	0.35115	0.215212
sp|P09651|ROA1_HUMAN	Heterogeneous nuclear ribonucleoprotein A1 OS=Homo sapiens GN=HNRNPA1 PE=1 SV=5	2.43869	0.0902853	0.252882	0.430692	0.457376	0.00481564	0.945236	0.987755	1.01314	0.734432	0.0983729
sp|Q9BSJ8|ESYT1_HUMAN	Extended synaptotagmin-1 OS=Homo sapiens GN=ESYT1 PE=1 SV=1	2.31458	0.102846	0.210687	0.293723	0.0920351	0.0123575	0.90103	1.08604	0.817867	0.684056	0.144176
sp|Q12906|ILF3_HUMAN	Interleukin enhancer-binding factor 3 OS=Homo sapiens GN=ILF3 PE=1 SV=3	2.20312	0.115756	0.287814	0.20551	0.195661	0.00975419	0.939822	0.906694	0.906304	0.725247	0.111265
sp|Q9H773|DCTP1_HUMAN	dCTP pyrophosphatase 1 OS=Homo sapiens GN=DCTPP1 PE=1 SV=1	2.16595	0.120442	0.367437	0.363499	0.0883678	0.0119777	0.889769	1.20102	0.559734	0.345147	0.247634
sp|Q15717|ELAV1_HUMAN	ELAV-like protein 1 OS=Homo sapiens GN=ELAVL1 PE=1 SV=2	2.11283	0.1275	0.478859	0.184761	0.434659	0.0082905	0.946155	0.684714	0.914245	0.324976	0.23878
sp|Q12874|SF3A3_HUMAN	Splicing factor 3A subunit 3 OS=Homo sapiens GN=SF3A3 PE=1 SV=1	2.1007	0.129173	0.107253	0.485117	0.383936	0.0117765	1.29495	0.996706	1.06312	0.529009	0.135379
sp|O75351|VPS4B_HUMAN	Vacuolar protein sorting-associated protein 4B OS=Homo sapiens GN=VPS4B PE=1 SV=2	1.93956	0.153788	0.18235	0.0998503	0.205434	0.0284693	1.30864	0.682216	0.803153	0.545949	0.154558
sp|O43390|HNRPR_HUMAN	Heterogeneous nuclear ribonucleoprotein R OS=Homo sapiens GN=HNRNPR PE=1 SV=1	1.93276	0.154932	0.226963	0.275884	0.100258	0.021095	0.856473	1.18748	0.699835	0.525257	0.225163
sp|P14317|HCLS1_HUMAN	Hematopoietic lineage cell-specific protein OS=Homo sapiens GN=HCLS1 PE=1 SV=3	1.84289	0.170928	0.410087	0.0646773	0.23593	0.0318771	1.12476	0.533648	1.40142	0.365071	0.324734
sp|Q16629|SRSF7_HUMAN	Serine/arginine-rich splicing factor 7 OS=Homo sapiens GN=SRSF7 PE=1 SV=1	1.83838	0.171776	0.454739	0.250309	0.0828099	0.0238324	0.991394	1.33467	0.455739	0.401058	0.22187
sp|P62249|RS16_HUMAN	40S ribosomal protein S16 OS=Homo sapiens GN=RPS16 PE=1 SV=2	1.81484	0.176273	0.119381	0.308746	0.107686	0.0341229	0.590363	1.33361	0.651715	0.400325	0.265162
sp|P08240|SRPR_HUMAN	Signal recognition particle receptor subunit alpha OS=Homo sapiens GN=SRPR PE=1 SV=2	1.79765	0.179636	0.115261	0.393536	0.27095	0.0186257	0.593541	0.890062	0.780904	0.457314	0.195631
sp|Q05519|SRS11_HUMAN	Serine/arginine-rich splicing factor 11 OS=Homo sapiens GN=SRSF11 PE=1 SV=1	1.78953	0.181248	0.453704	0.0758279	0.3175	0.0248156	0.959973	0.49561	0.903786	0.333089	0.208208
sp|Q92945|FUBP2_HUMAN	Far upstream element-binding protein 2 OS=Homo sapiens GN=KHSRP PE=1 SV=4	1.74265	0.190861	0.212476	0.459167	0.0591736	0.0492514	1.15946	1.02958	1.32804	0.731589	0.169222
sp|Q9NZL9|MAT2B_HUMAN	Methionine adenosyltransferase 2 subunit beta OS=Homo sapiens GN=MAT2B PE=1 SV=1	1.62728	0.216873	0.126654	0.191254	0.205795	0.039352	0.708099	1.29202	0.796524	0.517788	0.143761
sp|P14866|HNRPL_HUMAN	Heterogeneous nuclear ribonucleoprotein L OS=Homo sapiens GN=HNRNPL PE=1 SV=2	1.60608	0.222043	0.333762	0.434705	0.24782	0.0154078	0.933014	1.06211	0.889361	0.626497	0.181703
sp|P22087|FBRL_HUMAN	rRNA 2'-O-methyltransferase fibrillarin OS=Homo sapiens GN=FBL PE=1 SV=2	1.59486	0.224832	0.192118	0.278952	0.0826756	0.0499218	0.852938	1.13576	0.730037	0.679796	0.144441
sp|P63241|IF5A1_HUMAN	Eukaryotic translation initiation factor 5A-1 OS=Homo sapiens GN=EIF5A PE=1 SV=2	1.59126	0.225736	0.166973	0.261731	0.249938	0.0291061	1.22461	1.1514	1.15855	0.644894	0.187161
sp|P13010|XRCC5_HUMAN	X-ray repair cross-complementing protein 5 OS=Homo sapiens GN=XRCC5 PE=1 SV=3	1.5852	0.227264	0.271093	0.44348	0.275217	0.0173743	1.06644	1.01379	1.06765	0.776985	0.101293
sp|P43686|PRS6B_HUMAN	26S protease regulatory subunit 6B OS=Homo sapiens GN=PSMC4 PE=1 SV=2	1.527	0.242491	0.353975	0.386632	0.331643	0.015676	0.971499	0.855269	0.847386	0.276168	0.305062
sp|P61313|RL15_HUMAN	60S ribosomal protein L15 OS=Homo sapiens GN=RPL15 PE=1 SV=2	1.49733	0.250655	0.321992	0.325061	0.181901	0.0234749	0.770404	0.888746	0.816538	0.253191	0.325487
sp|P43487|RANG_HUMAN	Ran-specific GTPase-activating protein OS=Homo sapiens GN=RANBP1 PE=1 SV=1	1.42649	0.271311	0.438008	0.17391	0.372603	0.0255978	1.00551	1.29839	0.855596	0.361072	0.241246
sp|Q96EP5|DAZP1_HUMAN	DAZ-associated protein 1 OS=Homo sapiens GN=DAZAP1 PE=1 SV=1	1.37417	0.287674	0.234913	0.238269	0.161291	0.0497989	1.43743	1.44559	1.61646	0.503305	0.224296
sp|P46781|RS9_HUMAN	40S ribosomal protein S9 OS=Homo sapiens GN=RPS9 PE=1 SV=3	1.32693	0.303305	0.192979	0.339355	0.212789	0.0369385	0.654749	0.817885	0.725259	0.487898	0.383329
sp|P62316|SMD2_HUMAN	Small nuclear ribonucleoprotein Sm D2 OS=Homo sapiens GN=SNRPD2 PE=1 SV=1	1.29159	0.315552	0.334874	0.391777	0.202417	0.0298771	0.839722	1.13548	0.673072	0.308893	0.249379
sp|Q99439|CNN2_HUMAN	Calponin-2 OS=Homo sapiens GN=CNN2 PE=1 SV=4	1.2137	0.3443	0.291518	0.417446	0.470671	0.0264804	1.21245	0.879012	0.935704	0.457186	0.168757
sp|P31153|METK2_HUMAN	S-adenosylmethionine synthase isoform type-2 OS=Homo sapiens GN=MAT2A PE=1 SV=1	1.165	0.363563	0.482041	0.172021	0.497634	0.0396648	0.998654	1.27692	0.985703	0.530102	0.149085
sp|Q14152|EIF3A_HUMAN	Eukaryotic translation initiation factor 3 subunit A OS=Homo sapiens GN=EIF3A PE=1 SV=1	1.1079	0.387473	0.252669	0.236698	0.461994	0.0442458	0.85993	1.14426	1.0065	0.644418	0.159146
sp|O75396|SC22B_HUMAN	Vesicle-trafficking protein SEC22b OS=Homo sapiens GN=SEC22B PE=1 SV=4	1.07007	0.404125	0.4097	0.40406	0.214628	0.0407374	0.9077	0.982643	0.667381	0.493247	0.149868
sp|Q92974|ARHG2_HUMAN	Rho guanine nucleotide exchange factor 2 OS=Homo sapiens GN=ARHGEF2 PE=1 SV=4	1.04707	0.414573	0.470058	0.489701	0.411591	0.0308045	0.98198	1.01328	0.923542	0.507572	0.147952
sp|Q01130|SRSF2_HUMAN	Serine/arginine-rich splicing factor 2 OS=Homo sapiens GN=SRSF2 PE=1 SV=4	1.0091	0.432375	0.294294	0.395435	0.299008	0.0434525	0.879318	0.948338	0.838293	0.535049	0.179784
sp|P53396|ACLY_HUMAN	ATP-citrate synthase OS=Homo sapiens GN=ACLY PE=1 SV=3	0.872235	0.502336	0.336876	0.423742	0.363285	0.049933	0.931976	1.07113	1.0799	0.702107	0.192705
sp|P42704|LPPRC_HUMAN	Leucine-rich PPR motif-containing protein, mitochondrial OS=Homo sapiens GN=LRPPRC PE=1 SV=3	32.682	1.96721e-07	0.0794971	0.466146	0.00036157	0	0.868793	1.01552	0.637192	0.252685	0.132484
sp|P49736|MCM2_HUMAN	DNA replication licensing factor MCM2 OS=Homo sapiens GN=MCM2 PE=1 SV=4	20.543	4.39893e-06	0.14324	0.490589	0.0131818	0	0.85271	1.01202	0.672077	0.145374	0.180561
sp|P52597|HNRPF_HUMAN	Heterogeneous nuclear ribonucleoprotein F OS=Homo sapiens GN=HNRNPF PE=1 SV=3	19.6085	5.9315e-06	0.312534	0.303798	0.0365806	0	0.933441	0.925005	0.735143	0.147709	0.113268
sp|P33993|MCM7_HUMAN	DNA replication licensing factor MCM7 OS=Homo sapiens GN=MCM7 PE=1 SV=4	16.2669	1.91577e-05	0.130667	0.233255	0.0124793	0	0.874616	1.09844	0.728726	0.30029	0.141262
sp|P07384|CAN1_HUMAN	Calpain-1 catalytic subunit OS=Homo sapiens GN=CAPN1 PE=1 SV=1	2.71293	0.0680699	0.0625435	0.0643031	0.0451343	0.0712961	0.554773	0.518482	0.475509	0.543325	0.139553
sp|Q9Y230|RUVB2_HUMAN	RuvB-like 2 OS=Homo sapiens GN=RUVBL2 PE=1 SV=3	2.2824	0.106405	0.0610348	0.463134	0.0118182	0.349128	0.588764	1.00102	0.381493	0.897809	0.260198
sp|Q9UMX0|UBQL1_HUMAN	Ubiquilin-1 OS=Homo sapiens GN=UBQLN1 PE=1 SV=2	2.2397	0.111335	0.101876	0.0501777	0.0424483	0.206034	0.545904	0.452875	0.453193	0.789853	0.254877
sp|Q7Z4W1|DCXR_HUMAN	L-xylulose reductase OS=Homo sapiens GN=DCXR PE=1 SV=2	2.17822	0.118873	0.172476	0.197081	0.0295764	0.0602682	0.824468	1.217	0.596558	0.668831	0.104023
sp|P54136|SYRC_HUMAN	Arginyl-tRNA synthetase, cytoplasmic OS=Homo sapiens GN=RARS PE=1 SV=2	2.11894	0.126665	0.125338	0.293573	0.026312	0.0748156	0.690779	0.866295	0.446412	0.557102	0.228743
sp|P15144|AMPN_HUMAN	Aminopeptidase N OS=Homo sapiens GN=ANPEP PE=1 SV=4	2.04076	0.137795	0.253897	0.299018	0.0122521	0.160201	0.908115	1.10441	0.644412	1.17903	0.181031
sp|O60832|DKC1_HUMAN	H/ACA ribonucleoprotein complex subunit 4 OS=Homo sapiens GN=DKC1 PE=1 SV=3	1.96993	0.148789	0.0577176	0.191328	0.0282541	0.415162	0.45989	1.41646	0.375666	0.907622	0.213585
sp|P51148|RAB5C_HUMAN	Ras-related protein Rab-5C OS=Homo sapiens GN=RAB5C PE=1 SV=2	1.9676	0.149166	0.17646	0.068073	0.037655	0.191765	0.598922	0.533711	0.394223	0.589833	0.267684
sp|O14744|ANM5_HUMAN	Protein arginine N-methyltransferase 5 OS=Homo sapiens GN=PRMT5 PE=1 SV=4	1.94258	0.153284	0.0917505	0.18463	0.0468388	0.0979218	0.506277	0.656062	0.551493	0.526936	0.184924
sp|Q8NBJ5|GT251_HUMAN	Procollagen galactosyltransferase 1 OS=Homo sapiens GN=GLT25D1 PE=1 SV=1	1.92672	0.155955	0.111015	0.233611	0.0267355	0.14933	0.721396	0.828644	0.535451	0.735387	0.140528
sp|Q9UHL4|DPP2_HUMAN	Dipeptidyl peptidase 2 OS=Homo sapiens GN=DPP7 PE=1 SV=3	1.90581	0.159555	0.101683	0.156314	0.0335537	0.176257	0.748792	0.800658	0.639264	0.806069	0.0971823
sp|Q01844|EWS_HUMAN	RNA-binding protein EWS OS=Homo sapiens GN=EWSR1 PE=1 SV=1	1.79078	0.181	0.202911	0.235407	0.0335227	0.0906927	0.784546	0.803138	0.550141	0.671134	0.125016
sp|P55084|ECHB_HUMAN	Trifunctional enzyme subunit beta, mitochondrial OS=Homo sapiens GN=HADHB PE=1 SV=3	1.73904	0.191624	0.154516	0.0772311	0.0444008	0.285374	0.709345	0.668492	0.524834	0.81804	0.343042
sp|Q9UBQ0|VPS29_HUMAN	Vacuolar protein sorting-associated protein 29 OS=Homo sapiens GN=VPS29 PE=1 SV=1	1.6403	0.213761	0.329255	0.45102	0.0458161	0.0500223	0.854326	0.9373	0.51018	0.520413	0.150365
sp|P23396|RS3_HUMAN	40S ribosomal protein S3 OS=Homo sapiens GN=RPS3 PE=1 SV=2	1.62777	0.216755	0.310222	0.370365	0.0460434	0.0557318	0.908871	1.0671	0.676589	0.691287	0.204105
sp|P06865|HEXA_HUMAN	Beta-hexosaminidase subunit alpha OS=Homo sapiens GN=HEXA PE=1 SV=2	1.5897	0.226127	0.0545841	0.346932	0.0472831	0.301106	0.501204	0.816516	0.44887	1.24533	0.2178
sp|P07954|FUMH_HUMAN	Fumarate hydratase, mitochondrial OS=Homo sapiens GN=FH PE=1 SV=3	1.50153	0.249483	0.36119	0.156155	0.032624	0.19381	0.93548	0.80848	0.640967	1.18692	0.107295
sp|P60953|CDC42_HUMAN	Cell division control protein 42 homolog OS=Homo sapiens GN=CDC42 PE=1 SV=2	1.38971	0.282712	0.281925	0.255463	0.0266839	0.298391	0.85556	1.19511	0.533259	1.11787	0.150524
sp|P23434|GCSH_HUMAN	Glycine cleavage system H protein, mitochondrial OS=Homo sapiens GN=GCSH PE=1 SV=2	1.25415	0.329061	0.388133	0.436876	0.0294525	0.211899	0.89842	1.08267	0.491224	1.37682	0.105892
sp|Q2VIR3|IF2GL_HUMAN	Eukaryotic translation initiation factor 2 subunit 3-like protein OS=Homo sapiens GN=EIF2S3L PE=1 SV=2	1.2053	0.34755	0.363868	0.403948	0.0467872	0.126134	0.861912	1.15707	0.514006	0.530616	0.129821
sp|P33992|MCM5_HUMAN	DNA replication licensing factor MCM5 OS=Homo sapiens GN=MCM5 PE=1 SV=5	12.9268	7.58911e-05	0.0326402	0.482993	0.0931405	0	0.694178	1.00472	0.765363	0.152447	0.188924
sp|P06737|PYGL_HUMAN	Glycogen phosphorylase, liver form OS=Homo sapiens GN=PYGL PE=1 SV=4	4.95485	0.00886922	0.000357834	0.187194	0.382634	0.282469	0.206609	0.772176	0.912411	1.13288	0.175837
sp|P41252|SYIC_HUMAN	Isoleucyl-tRNA synthetase, cytoplasmic OS=Homo sapiens GN=IARS PE=1 SV=2	2.77851	0.0636952	0.00368472	0.448934	0.127428	0.324883	0.272104	1.11383	0.726086	0.85887	0.296636
sp|P21796|VDAC1_HUMAN	Voltage-dependent anion-selective channel protein 1 OS=Homo sapiens GN=VDAC1 PE=1 SV=2	2.67574	0.0706968	0.0108317	0.0716464	0.421312	0.0977318	0.433991	0.507202	1.10503	1.56164	0.216697
sp|Q96EL3|RM53_HUMAN	39S ribosomal protein L53, mitochondrial OS=Homo sapiens GN=MRPL53 PE=1 SV=1	2.27384	0.107375	0.0239555	0.093218	0.0863533	0.209173	0.366669	0.489503	0.471892	0.58258	0.186543
sp|P06733|ENOA_HUMAN	Alpha-enolase OS=Homo sapiens GN=ENO1 PE=1 SV=2	2.15157	0.12231	0.0426306	0.092666	0.0591322	0.205933	0.847403	0.878691	0.859982	0.923524	0.122001
sp|P05164|PERM_HUMAN	Myeloperoxidase OS=Homo sapiens GN=MPO PE=1 SV=1	2.0847	0.131417	0.0281915	0.0522638	0.160103	0.454547	0.736456	1.30071	0.862894	1.01617	0.172836
sp|Q9Y2Q3|GSTK1_HUMAN	Glutathione S-transferase kappa 1 OS=Homo sapiens GN=GSTK1 PE=1 SV=3	1.90896	0.159007	0.00902321	0.498045	0.347355	0.220804	0.424152	1.04296	0.877624	0.756521	0.241867
sp|P48444|COPD_HUMAN	Coatomer subunit delta OS=Homo sapiens GN=ARCN1 PE=1 SV=1	1.78157	0.182843	0.0106867	0.28724	0.410269	0.280894	0.409284	0.816255	1.10959	1.24321	0.137168
sp|P13929|ENOB_HUMAN	Beta-enolase OS=Homo sapiens GN=ENO3 PE=1 SV=4	1.72113	0.195451	0.019294	0.0938541	0.473698	0.42057	0.422209	0.562758	1.05325	1.12578	0.212065
sp|Q13303|KCAB2_HUMAN	Voltage-gated potassium channel subunit beta-2 OS=Homo sapiens GN=KCNAB2 PE=1 SV=2	1.71736	0.196268	0.0161702	0.426726	0.1647	0.238581	0.484465	0.923791	0.670798	0.746951	0.256531
sp|Q13765|NACA_HUMAN	Nascent polypeptide-associated complex subunit alpha OS=Homo sapiens GN=NACA PE=1 SV=1	1.22076	0.341593	0.0440039	0.162675	0.317634	0.264201	0.59471	0.701898	1.15503	1.19453	0.18162
sp|P10155|RO60_HUMAN	60 kDa SS-A/Ro ribonucleoprotein OS=Homo sapiens GN=TROVE2 PE=1 SV=2	1.12726	0.3792	0.0494487	0.247353	0.170992	0.377218	0.436409	1.47443	0.639345	0.865256	0.207918
sp|P62424|RL7A_HUMAN	60S ribosomal protein L7a OS=Homo sapiens GN=RPL7A PE=1 SV=2	0.981414	0.445787	0.03206	0.430103	0.408678	0.475251	0.350771	1.10549	1.20041	1.15102	0.229153
sp|O43615|TIM44_HUMAN	Mitochondrial import inner membrane translocase subunit TIM44 OS=Homo sapiens GN=TIMM44 PE=1 SV=2	0.979037	0.446956	0.0398936	0.290945	0.316612	0.429587	0.57218	0.87984	0.878893	1.05157	0.13669
sp|P11413|G6PD_HUMAN	Glucose-6-phosphate 1-dehydrogenase OS=Homo sapiens GN=G6PD PE=1 SV=4	79.9094	3.13019e-10	0.000116054	0.365173	0	0	2.76787	0.923005	4.83124	7.698	0.097643
sp|Q92598|HS105_HUMAN	Heat shock protein 105 kDa OS=Homo sapiens GN=HSPH1 PE=1 SV=1	4.80287	0.0100419	0.000918762	0.19666	0.147862	0.173363	2.70625	1.31295	1.41284	0.679931	0.18023
sp|Q8TAA3|PSA7L_HUMAN	Proteasome subunit alpha type-7-like OS=Homo sapiens GN=PSMA8 PE=1 SV=3	3.98007	0.020333	0.00687621	0.086623	0.0713946	0.0586927	3.27933	1.91871	1.92197	1.99906	0.145629
sp|Q99497|PARK7_HUMAN	Protein DJ-1 OS=Homo sapiens GN=PARK7 PE=1 SV=2	3.40995	0.034349	0.00269826	0.128176	0.24469	0.309151	1.69278	1.23045	1.14197	1.09781	0.141888
sp|P30153|2AAA_HUMAN	Serine/threonine-protein phosphatase 2A 65 kDa regulatory subunit A alpha isoform OS=Homo sapiens GN=PPP2R1A PE=1 SV=4	3.15823	0.0437283	0.00478723	0.120617	0.184008	0.204223	1.59196	1.2333	1.18268	0.867422	0.111813
sp|Q9BWD1|THIC_HUMAN	Acetyl-CoA acetyltransferase, cytosolic OS=Homo sapiens GN=ACAT2 PE=1 SV=2	2.99524	0.0512989	0.0244971	0.0607951	0.156219	0.0532291	1.45446	1.36076	1.2216	1.3491	0.142434
sp|P09467|F16P1_HUMAN	Fructose-1,6-bisphosphatase 1 OS=Homo sapiens GN=FBP1 PE=1 SV=5	2.81164	0.0616035	0.0031528	0.455819	0.441271	0.274916	3.82207	0.749543	0.893503	1.05722	0.150773
sp|P30042|ES1_HUMAN	ES1 protein homolog, mitochondrial OS=Homo sapiens GN=C21orf33 PE=1 SV=3	2.71852	0.0676849	0.0170019	0.239532	0.0603926	0.119341	2.35061	1.46411	1.90367	1.59555	0.199308
sp|P62993|GRB2_HUMAN	Growth factor receptor-bound protein 2 OS=Homo sapiens GN=GRB2 PE=1 SV=1	2.68292	0.0701814	0.0106093	0.345903	0.0683988	0.19876	2.06794	1.15379	1.60985	1.31894	0.157105
sp|P42166|LAP2A_HUMAN	Lamina-associated polypeptide 2, isoform alpha OS=Homo sapiens GN=TMPO PE=1 SV=2	2.19097	0.117265	0.0171857	0.134556	0.185568	0.213464	1.37069	1.17513	1.1404	1.12107	0.100639
sp|O15427|MOT4_HUMAN	Monocarboxylate transporter 4 OS=Homo sapiens GN=SLC16A3 PE=1 SV=1	2.16009	0.1212	0.00798839	0.463489	0.296529	0.241162	2.34565	0.848139	1.14527	1.19872	0.134159
sp|O43399|TPD54_HUMAN	Tumor protein D54 OS=Homo sapiens GN=TPD52L2 PE=1 SV=2	2.04697	0.136874	0.0094294	0.402909	0.231147	0.362078	2.05333	1.09211	1.26828	1.12013	0.0977563
sp|P78417|GSTO1_HUMAN	Glutathione S-transferase omega-1 OS=Homo sapiens GN=GSTO1 PE=1 SV=2	1.95333	0.151499	0.0402128	0.148587	0.0845455	0.247464	1.76829	1.46362	1.57566	1.27175	0.159626
sp|O43707|ACTN4_HUMAN	Alpha-actinin-4 OS=Homo sapiens GN=ACTN4 PE=1 SV=2	1.93901	0.153881	0.0427853	0.490589	0.115692	0.0713743	1.27848	1.02274	1.18926	1.2283	0.180038
tr|E7EPW1|E7EPW1_HUMAN	Uncharacterized protein OS=Homo sapiens GN=GAPDH PE=3 SV=1	1.93102	0.155226	0.0202611	0.29696	0.0939876	0.472078	2.68669	1.34876	1.88413	1.04195	0.167671
sp|P37108|SRP14_HUMAN	Signal recognition particle 14 kDa protein OS=Homo sapiens GN=SRP14 PE=1 SV=2	1.6919	0.201876	0.0469729	0.325772	0.101643	0.148804	2.35899	1.51336	1.86109	1.59738	0.218324
tr|D6RBZ0|D6RBZ0_HUMAN	Uncharacterized protein OS=Homo sapiens GN=HNRNPAB PE=4 SV=1	1.69041	0.202208	0.0480077	0.340253	0.121364	0.115397	1.31452	1.06875	1.22216	1.21173	0.0917067
sp|P52565|GDIR1_HUMAN	Rho GDP-dissociation inhibitor 1 OS=Homo sapiens GN=ARHGDIA PE=1 SV=3	1.67511	0.205665	0.0392263	0.342011	0.134855	0.140581	1.44065	1.09148	1.26398	1.2348	0.157404
sp|P51149|RAB7A_HUMAN	Ras-related protein Rab-7a OS=Homo sapiens GN=RAB7A PE=1 SV=1	1.62808	0.21668	0.0166731	0.349785	0.247934	0.452112	1.89791	1.22635	1.24178	1.01935	0.268908
sp|P35244|RFA3_HUMAN	Replication protein A 14 kDa subunit OS=Homo sapiens GN=RPA3 PE=1 SV=1	1.38917	0.282883	0.0365377	0.42986	0.139494	0.330279	1.73293	1.00629	1.41381	0.852055	0.187888
sp|Q13867|BLMH_HUMAN	Bleomycin hydrolase OS=Homo sapiens GN=BLMH PE=1 SV=1	1.01077	0.431576	0.0440716	0.396277	0.396415	0.282436	1.93502	1.15392	1.1161	0.776458	0.165927
sp|P11021|GRP78_HUMAN	78 kDa glucose-regulated protein OS=Homo sapiens GN=HSPA5 PE=1 SV=2	37.8312	7.09597e-08	0.0828433	0.269373	0.000216942	0	1.17623	1.0774	1.65657	2.58672	0.11487
sp|P60174|TPIS_HUMAN	Triosephosphate isomerase OS=Homo sapiens GN=TPI1 PE=1 SV=2	4.49127	0.0130292	0.144178	0.48421	0.00207645	0.0561899	1.11877	1.00002	1.40565	1.17753	0.0899517
sp|P0CG47|UBB_HUMAN	Polyubiquitin-B OS=Homo sapiens GN=UBB PE=1 SV=1	3.62392	0.0281119	0.121925	0.104181	0.00527893	0.162804	1.23692	1.25893	1.65471	1.18649	0.116096
sp|P52566|GDIR2_HUMAN	Rho GDP-dissociation inhibitor 2 OS=Homo sapiens GN=ARHGDIB PE=1 SV=3	3.5253	0.030815	0.0788395	0.0620299	0.0112913	0.101709	1.22816	0.797444	1.42295	1.20053	0.158593
sp|P28062|PSB8_HUMAN	Proteasome subunit beta type-8 OS=Homo sapiens GN=PSMB8 PE=1 SV=3	3.45086	0.0330466	0.124159	0.288522	0.00655992	0.0620894	2.72782	2.41237	5.77298	3.15745	0.208625
sp|P63000|RAC1_HUMAN	Ras-related C3 botulinum toxin substrate 1 OS=Homo sapiens GN=RAC1 PE=1 SV=1	2.62379	0.074554	0.0502321	0.129654	0.0297831	0.161765	1.90247	1.48782	2.22007	1.37074	0.162774
contam_gi|1346343|sp|P04264|K2C1_HUMAN	KERATIN, TYPE II CYTOSKELETAL 1 (CYTOKERATIN 1) (K1) (CK 1) (67 KD CYTOKERATIN) (HAIR ALPHA PROTEIN) gi|186772 (M98776) keratin 1 [Homo sapiens]	2.54404	0.0809307	0.134014	0.182572	0.0179959	0.0986034	3.56138	3.47681	7.1229	3.40707	0.681119
sp|Q92688|AN32B_HUMAN	Acidic leucine-rich nuclear phosphoprotein 32 family member B OS=Homo sapiens GN=ANP32B PE=1 SV=1	2.38262	0.0957408	0.227224	0.212965	0.0126343	0.147743	1.20936	1.23081	1.76897	1.29784	0.10943
sp|P07195|LDHB_HUMAN	L-lactate dehydrogenase B chain OS=Homo sapiens GN=LDHB PE=1 SV=2	2.38123	0.0958797	0.0591779	0.206866	0.0198037	0.348179	1.18443	1.09607	1.26272	1.04352	0.100048
sp|P15153|RAC2_HUMAN	Ras-related C3 botulinum toxin substrate 2 OS=Homo sapiens GN=RAC2 PE=1 SV=1	2.31967	0.102296	0.0541489	0.13015	0.0443079	0.170525	1.59161	1.40666	1.64471	1.30479	0.229246
sp|P50570|DYN2_HUMAN	Dynamin-2 OS=Homo sapiens GN=DNM2 PE=1 SV=2	2.31275	0.103046	0.155774	0.369364	0.0218595	0.0679665	1.61485	1.17757	2.30595	1.84892	0.15326
sp|P56192|SYMC_HUMAN	Methionyl-tRNA synthetase, cytoplasmic OS=Homo sapiens GN=MARS PE=1 SV=2	2.26862	0.10797	0.292079	0.448653	0.0156921	0.0764804	1.13947	0.975263	1.54869	0.72012	0.152865
sp|Q92841|DDX17_HUMAN	Probable ATP-dependent RNA helicase DDX17 OS=Homo sapiens GN=DDX17 PE=1 SV=1	2.23957	0.11135	0.103027	0.224397	0.0154959	0.447799	1.17075	1.1052	1.33233	1.01687	0.0850876
sp|P35659|DEK_HUMAN	Protein DEK OS=Homo sapiens GN=DEK PE=1 SV=1	1.9894	0.145678	0.0786944	0.167615	0.0396074	0.232927	1.50836	1.31533	1.70384	1.21973	0.192174
sp|P46459|NSF_HUMAN	Vesicle-fusing ATPase OS=Homo sapiens GN=NSF PE=1 SV=3	1.88794	0.162701	0.0848549	0.428952	0.048657	0.101028	2.07389	1.20464	2.42789	1.86415	0.273152
sp|P09661|RU2A_HUMAN	U2 small nuclear ribonucleoprotein A' OS=Homo sapiens GN=SNRPA1 PE=1 SV=2	1.85082	0.169448	0.179932	0.16754	0.0342355	0.165531	1.46996	1.48364	1.95393	1.42022	0.209079
sp|P33778|H2B1B_HUMAN	Histone H2B type 1-B OS=Homo sapiens GN=HIST1H2BB PE=1 SV=2	1.84633	0.170284	0.244797	0.285444	0.0299174	0.10381	1.18051	1.11486	1.89542	1.51908	0.233264
sp|Q9Y3F4|STRAP_HUMAN	Serine-threonine kinase receptor-associated protein OS=Homo sapiens GN=STRAP PE=1 SV=1	1.82562	0.174199	0.0717505	0.26087	0.0353822	0.391598	1.72638	1.26814	2.02313	0.842593	0.132931
sp|Q15691|MARE1_HUMAN	Microtubule-associated protein RP/EB family member 1 OS=Homo sapiens GN=MAPRE1 PE=1 SV=3	1.45436	0.262985	0.210986	0.224518	0.0375723	0.270994	1.27124	0.765932	1.7635	1.18934	0.158236
sp|P37837|TALDO_HUMAN	Transaldolase OS=Homo sapiens GN=TALDO1 PE=1 SV=2	1.0931	0.393907	0.420077	0.465959	0.0484401	0.194101	1.0427	1.01702	1.36508	1.16108	0.147118
sp|Q9NYU2|UGGG1_HUMAN	UDP-glucose:glycoprotein glucosyltransferase 1 OS=Homo sapiens GN=UGGT1 PE=1 SV=3	6.42499	0.00290959	0.127012	0.0933863	0.39093	0.000357542	1.25754	1.29493	1.06163	2.10843	0.143521
sp|P23368|MAOM_HUMAN	NAD-dependent malic enzyme, mitochondrial OS=Homo sapiens GN=ME2 PE=1 SV=1	5.28208	0.00682955	0.322979	0.340019	0.468079	0.000446927	1.1047	0.930246	0.989147	2.09771	0.123493
sp|P34897|GLYM_HUMAN	Serine hydroxymethyltransferase, mitochondrial OS=Homo sapiens GN=SHMT2 PE=1 SV=3	5.08415	0.00799129	0.142959	0.443985	0.0645145	0.000949721	1.2981	1.04669	1.47764	2.2344	0.209886
sp|P30101|PDIA3_HUMAN	Protein disulfide-isomerase A3 OS=Homo sapiens GN=PDIA3 PE=1 SV=4	4.94075	0.00897125	0.232553	0.492797	0.0532231	0.00102793	1.08735	1.00552	1.20779	1.47171	0.118868
sp|Q13011|ECH1_HUMAN	Delta(3,5)-Delta(2,4)-dienoyl-CoA isomerase, mitochondrial OS=Homo sapiens GN=ECH1 PE=1 SV=2	4.14267	0.0176054	0.417863	0.164247	0.124556	0.00156425	0.966831	0.850565	1.18791	1.61938	0.105856
sp|P06576|ATPB_HUMAN	ATP synthase subunit beta, mitochondrial OS=Homo sapiens GN=ATP5B PE=1 SV=3	4.11075	0.018107	0.128849	0.121123	0.0660744	0.00319553	1.15441	0.874386	1.21922	1.44464	0.165
sp|Q9HDC9|APMAP_HUMAN	Adipocyte plasma membrane-associated protein OS=Homo sapiens GN=APMAP PE=1 SV=2	3.88835	0.0220773	0.0697872	0.422928	0.0619215	0.00379888	1.40049	1.03945	1.43013	1.87752	0.114595
sp|O75874|IDHC_HUMAN	Isocitrate dehydrogenase [NADP] cytoplasmic OS=Homo sapiens GN=IDH1 PE=1 SV=2	3.87422	0.0223607	0.0776692	0.0915903	0.28282	0.00283799	0.473852	0.481445	0.960465	3.26098	0.314937
sp|P30048|PRDX3_HUMAN	Thioredoxin-dependent peroxide reductase, mitochondrial OS=Homo sapiens GN=PRDX3 PE=1 SV=3	3.77081	0.0245611	0.327099	0.344387	0.186818	0.00156425	1.12163	0.908561	0.818883	2.13262	0.118074
sp|Q9BS26|ERP44_HUMAN	Endoplasmic reticulum resident protein 44 OS=Homo sapiens GN=ERP44 PE=1 SV=1	3.56851	0.0295968	0.258346	0.141029	0.360444	0.00221229	0.852863	2.10826	1.02842	5.6941	0.228133
sp|Q16881|TRXR1_HUMAN	Thioredoxin reductase 1, cytoplasmic OS=Homo sapiens GN=TXNRD1 PE=1 SV=3	3.48205	0.0320905	0.0731335	0.254022	0.345362	0.00312849	2.72548	2.2462	1.55095	6.50456	0.219554
sp|Q04837|SSBP_HUMAN	Single-stranded DNA-binding protein, mitochondrial OS=Homo sapiens GN=SSBP1 PE=1 SV=1	3.33851	0.0367617	0.0556383	0.116604	0.0522934	0.0138101	0.638508	0.700911	0.591979	1.78416	0.187517
sp|O00754|MA2B1_HUMAN	Lysosomal alpha-mannosidase OS=Homo sapiens GN=MAN2B1 PE=1 SV=3	3.3311	0.0370226	0.119052	0.239729	0.175269	0.00332961	0.784384	0.846	0.803945	1.83175	0.224621
sp|P06744|G6PI_HUMAN	Glucose-6-phosphate isomerase OS=Homo sapiens GN=GPI PE=1 SV=4	3.29049	0.0384889	0.14765	0.104509	0.0705165	0.0087933	1.10696	1.1332	1.1622	1.27346	0.0766585
sp|P16403|H12_HUMAN	Histone H1.2 OS=Homo sapiens GN=HIST1H1C PE=1 SV=2	3.2861	0.0386511	0.482843	0.422142	0.111364	0.00268156	1.00091	1.04711	1.36024	2.03655	0.225024
sp|P62805|H4_HUMAN	Histone H4 OS=Homo sapiens GN=HIST1H4A PE=1 SV=2	3.20059	0.0419691	0.44413	0.244761	0.37718	0.00230168	0.984387	0.876258	1.09734	1.91035	0.231573
sp|P25786|PSA1_HUMAN	Proteasome subunit alpha type-1 OS=Homo sapiens GN=PSMA1 PE=1 SV=1	3.06509	0.0478906	0.120561	0.296829	0.105868	0.00575419	1.51955	1.17343	1.52124	2.26159	0.245076
sp|P25815|S100P_HUMAN	Protein S100-P OS=Homo sapiens GN=S100P PE=1 SV=2	3.0509	0.0485619	0.156973	0.322376	0.0762707	0.00612291	1.60646	1.13552	1.93863	2.95399	0.318006
sp|P08195|4F2_HUMAN	4F2 cell-surface antigen heavy chain OS=Homo sapiens GN=SLC3A2 PE=1 SV=3	3.01342	0.0503867	0.308288	0.162788	0.0717252	0.0067933	0.865342	1.41034	1.61162	2.11511	0.175649
sp|P51571|SSRD_HUMAN	Translocon-associated protein subunit delta OS=Homo sapiens GN=SSR4 PE=1 SV=1	2.96789	0.0527055	0.342224	0.343583	0.0971488	0.00425698	1.09394	0.862164	1.436	2.10323	0.167017
sp|P30046|DOPD_HUMAN	D-dopachrome decarboxylase OS=Homo sapiens GN=DDT PE=1 SV=3	2.96034	0.0531013	0.179894	0.0640318	0.0929545	0.0150838	1.29166	1.5488	1.45146	1.8004	0.0928998
sp|P30040|ERP29_HUMAN	Endoplasmic reticulum resident protein 29 OS=Homo sapiens GN=ERP29 PE=1 SV=4	2.89002	0.0569492	0.19234	0.271403	0.220413	0.00414525	1.15017	0.900061	1.14499	1.55807	0.123667
sp|P25788|PSA3_HUMAN	Proteasome subunit alpha type-3 OS=Homo sapiens GN=PSMA3 PE=1 SV=2	2.87809	0.0576323	0.108317	0.0549298	0.0557128	0.0434302	1.68899	1.96659	2.05315	1.98541	0.198658
sp|P61604|CH10_HUMAN	10 kDa heat shock protein, mitochondrial OS=Homo sapiens GN=HSPE1 PE=1 SV=2	2.77506	0.0639177	0.0546132	0.173742	0.120816	0.018905	1.35318	1.19675	1.25581	1.48987	0.164403
sp|Q9Y2B0|CNPY2_HUMAN	Protein canopy homolog 2 OS=Homo sapiens GN=CNPY2 PE=1 SV=1	2.71306	0.0680615	0.147369	0.125772	0.117428	0.0126816	1.62238	1.69576	1.69029	2.66095	0.235198
sp|P63104|1433Z_HUMAN	14-3-3 protein zeta/delta OS=Homo sapiens GN=YWHAZ PE=1 SV=1	2.71265	0.0680895	0.123578	0.385108	0.0538326	0.0149274	1.17955	1.04082	1.27178	1.37382	0.149227
sp|P31948|STIP1_HUMAN	Stress-induced-phosphoprotein 1 OS=Homo sapiens GN=STIP1 PE=1 SV=1	2.64782	0.0727415	0.365	0.132844	0.083936	0.010648	1.04445	0.876617	1.17963	1.31608	0.0690478
sp|P49720|PSB3_HUMAN	Proteasome subunit beta type-3 OS=Homo sapiens GN=PSMB3 PE=1 SV=2	2.64023	0.0733087	0.100522	0.0526473	0.384845	0.0189497	1.38566	1.48227	1.08006	1.63807	0.134525
sp|O96008|TOM40_HUMAN	Mitochondrial import receptor subunit TOM40 homolog OS=Homo sapiens GN=TOMM40 PE=1 SV=1	2.62212	0.0746812	0.160193	0.292488	0.0745455	0.0102682	0.732888	0.83262	0.654989	1.93185	0.15061
sp|P00505|AATM_HUMAN	Aspartate aminotransferase, mitochondrial OS=Homo sapiens GN=GOT2 PE=1 SV=3	2.57694	0.0782303	0.310648	0.479373	0.299545	0.00405587	1.25765	1.09613	1.27962	2.63452	0.204895
sp|O00231|PSD11_HUMAN	26S proteasome non-ATPase regulatory subunit 11 OS=Homo sapiens GN=PSMD11 PE=1 SV=3	2.55339	0.0801526	0.103839	0.240037	0.0549277	0.0260335	1.40754	1.22343	1.54	1.64828	0.10336
sp|P43307|SSRA_HUMAN	Translocon-associated protein subunit alpha OS=Homo sapiens GN=SSR1 PE=1 SV=3	2.5512	0.0803343	0.059942	0.190412	0.124979	0.0233073	1.65793	1.36046	1.46555	1.87949	0.0836153
sp|P14314|GLU2B_HUMAN	Glucosidase 2 subunit beta OS=Homo sapiens GN=PRKCSH PE=1 SV=2	2.49426	0.0852118	0.14942	0.0734051	0.367748	0.0122346	0.830789	0.758476	0.93484	1.41724	0.148827
tr|Q5VU58|Q5VU58_HUMAN	Tropomyosin 3 OS=Homo sapiens GN=TPM3 PE=2 SV=1	2.47427	0.0870001	0.345464	0.111422	0.181054	0.0096648	1.09777	0.704521	1.27003	1.79665	0.229227
sp|P25705|ATPA_HUMAN	ATP synthase subunit alpha, mitochondrial OS=Homo sapiens GN=ATP5A1 PE=1 SV=1	2.42224	0.0918502	0.0741006	0.399757	0.0895764	0.0221899	1.26838	0.983338	1.25664	1.39661	0.186593
sp|O00487|PSDE_HUMAN	26S proteasome non-ATPase regulatory subunit 14 OS=Homo sapiens GN=PSMD14 PE=1 SV=1	2.41827	0.092232	0.237002	0.431955	0.486529	0.00484916	1.27944	0.944703	1.05957	2.32652	0.142407
sp|Q96HY6|DDRGK_HUMAN	DDRGK domain-containing protein 1 OS=Homo sapiens GN=DDRGK1 PE=1 SV=2	2.2759	0.107141	0.105542	0.362432	0.0522521	0.0357989	1.91402	0.827866	2.26283	2.34113	0.138912
sp|Q14739|LBR_HUMAN	Lamin-B receptor OS=Homo sapiens GN=LBR PE=1 SV=2	2.12144	0.126325	0.323211	0.110075	0.0516736	0.0478994	1.27427	0.689086	2.18794	2.18596	0.219583
sp|O75947|ATP5H_HUMAN	ATP synthase subunit d, mitochondrial OS=Homo sapiens GN=ATP5H PE=1 SV=3	2.09912	0.129392	0.374217	0.0566698	0.326529	0.0204804	0.945839	0.726891	1.08298	1.42681	0.0834068
sp|P53999|TCP4_HUMAN	Activated RNA polymerase II transcriptional coactivator p15 OS=Homo sapiens GN=SUB1 PE=1 SV=3	2.07233	0.13318	0.144352	0.200879	0.163688	0.0208603	1.27235	0.824698	1.2476	1.56067	0.159147
sp|P36776|LONM_HUMAN	Lon protease homolog, mitochondrial OS=Homo sapiens GN=LONP1 PE=1 SV=2	2.05338	0.13593	0.0975145	0.0668101	0.228471	0.0479665	0.760928	0.760819	1.16215	1.37715	0.215307
sp|P08574|CY1_HUMAN	Cytochrome c1, heme protein, mitochondrial OS=Homo sapiens GN=CYC1 PE=1 SV=3	2.04046	0.137841	0.325116	0.146155	0.129442	0.0200894	1.22297	0.646259	1.6049	2.35385	0.333516
sp|O75340|PDCD6_HUMAN	Programmed cell death protein 6 OS=Homo sapiens GN=PDCD6 PE=1 SV=1	1.99928	0.144124	0.286451	0.0977362	0.236147	0.0217095	1.40178	1.93047	1.49658	2.56022	0.11773
sp|Q9NX63|CHCH3_HUMAN	Coiled-coil-helix-coiled-coil-helix domain-containing protein 3, mitochondrial OS=Homo sapiens GN=CHCHD3 PE=1 SV=1	1.9452	0.152846	0.130909	0.219429	0.194897	0.0234413	1.76589	0.969511	1.62551	2.55172	0.210791
sp|O15511|ARPC5_HUMAN	Actin-related protein 2/3 complex subunit 5 OS=Homo sapiens GN=ARPC5 PE=1 SV=3	1.9413	0.153496	0.246151	0.391085	0.0986157	0.0210615	1.17536	1.07167	1.34919	1.56692	0.113957
sp|Q9H4A4|AMPB_HUMAN	Aminopeptidase B OS=Homo sapiens GN=RNPEP PE=1 SV=2	1.91611	0.15777	0.100687	0.381422	0.104122	0.0376089	1.4221	1.04333	1.43812	1.66386	0.140085
sp|P35232|PHB_HUMAN	Prohibitin OS=Homo sapiens GN=PHB PE=1 SV=1	1.87773	0.164526	0.125957	0.392722	0.167324	0.0218324	0.854575	0.970472	1.14196	1.3177	0.109857
sp|Q6IBS0|TWF2_HUMAN	Twinfilin-2 OS=Homo sapiens GN=TWF2 PE=1 SV=2	1.8528	0.169081	0.337698	0.0700187	0.232903	0.031162	0.81212	0.460895	1.31303	1.91684	0.149264
sp|P31930|QCR1_HUMAN	Cytochrome b-c1 complex subunit 1, mitochondrial OS=Homo sapiens GN=UQCRC1 PE=1 SV=3	1.76949	0.185294	0.393646	0.406632	0.292479	0.0113184	1.10621	1.05579	0.831787	2.30051	0.266448
sp|P30050|RL12_HUMAN	60S ribosomal protein L12 OS=Homo sapiens GN=RPL12 PE=1 SV=1	1.75984	0.187275	0.444101	0.131431	0.262531	0.0213073	0.97451	1.32931	1.17388	1.63127	0.18069
sp|P38646|GRP75_HUMAN	Stress-70 protein, mitochondrial OS=Homo sapiens GN=HSPA9 PE=1 SV=2	1.71125	0.197598	0.395338	0.0894107	0.215227	0.0330279	1.03916	0.831176	1.11431	1.27529	0.143024
sp|P18465|1B57_HUMAN	HLA class I histocompatibility antigen, B-57 alpha chain OS=Homo sapiens GN=HLA-B PE=1 SV=1	1.69495	0.201195	0.316431	0.0963424	0.197934	0.0395419	1.08912	1.26417	1.17626	1.36465	0.101242
sp|O43175|SERA_HUMAN	D-3-phosphoglycerate dehydrogenase OS=Homo sapiens GN=PHGDH PE=1 SV=4	1.69162	0.201939	0.175493	0.353321	0.0813223	0.0488603	1.14112	1.05791	1.2204	1.25725	0.114937
sp|P50395|GDIB_HUMAN	Rab GDP dissociation inhibitor beta OS=Homo sapiens GN=GDI2 PE=1 SV=2	1.67284	0.206182	0.181809	0.114761	0.268347	0.0404581	1.18576	1.25608	1.12416	1.36802	0.165143
sp|Q99536|VAT1_HUMAN	Synaptic vesicle membrane protein VAT-1 homolog OS=Homo sapiens GN=VAT1 PE=1 SV=2	1.65458	0.210401	0.0884333	0.166258	0.332221	0.0486034	1.23052	1.15958	0.941694	1.28237	0.111937
sp|P62807|H2B1C_HUMAN	Histone H2B type 1-C/E/F/G/I OS=Homo sapiens GN=HIST1H2BC PE=1 SV=4	1.63521	0.214972	0.240174	0.384537	0.0854959	0.0405475	1.24438	1.24275	1.54165	1.69095	0.371809
sp|Q00059|TFAM_HUMAN	Transcription factor A, mitochondrial OS=Homo sapiens GN=TFAM PE=1 SV=1	1.63348	0.215386	0.273627	0.309616	0.292913	0.017743	1.36905	0.99954	1.27741	2.67005	0.233509
sp|Q8NBS9|TXND5_HUMAN	Thioredoxin domain-containing protein 5 OS=Homo sapiens GN=TXNDC5 PE=1 SV=2	1.5964	0.224448	0.194652	0.169523	0.198781	0.0400112	1.15505	1.17853	1.15649	1.34334	0.0840416
sp|O14773|TPP1_HUMAN	Tripeptidyl-peptidase 1 OS=Homo sapiens GN=TPP1 PE=1 SV=2	1.52871	0.242027	0.459333	0.11014	0.397221	0.0282905	0.968157	0.676291	1.08622	1.79391	0.167426
sp|P05141|ADT2_HUMAN	ADP/ATP translocase 2 OS=Homo sapiens GN=SLC25A5 PE=1 SV=7	1.48287	0.254735	0.247921	0.400552	0.289948	0.0209609	0.862071	1.05211	0.884992	1.5626	0.137282
sp|P61586|RHOA_HUMAN	Transforming protein RhoA OS=Homo sapiens GN=RHOA PE=1 SV=1	1.28201	0.318956	0.315174	0.415239	0.283564	0.0278771	1.07864	0.977262	1.09521	1.34053	0.108784
sp|Q9UL46|PSME2_HUMAN	Proteasome activator complex subunit 2 OS=Homo sapiens GN=PSME2 PE=1 SV=4	1.25322	0.329407	0.49825	0.390318	0.394721	0.0232514	1.01853	1.05341	0.961684	1.41384	0.160925
sp|Q9UL25|RAB21_HUMAN	Ras-related protein Rab-21 OS=Homo sapiens GN=RAB21 PE=1 SV=3	1.20461	0.34782	0.381238	0.190253	0.401374	0.0363911	1.07174	0.544905	1.16163	2.09806	0.177569
sp|O75367|H2AY_HUMAN	Core histone macro-H2A.1 OS=Homo sapiens GN=H2AFY PE=1 SV=4	1.03978	0.41794	0.334391	0.483732	0.263812	0.0427486	1.00396	0.958628	1.20915	2.3715	0.145568
sp|P50213|IDH3A_HUMAN	Isocitrate dehydrogenase [NAD] subunit alpha, mitochondrial OS=Homo sapiens GN=IDH3A PE=1 SV=1	0.994862	0.439225	0.494662	0.349186	0.294504	0.0425363	1.0056	0.953225	1.15814	1.49943	0.19292
sp|Q16836|HCDH_HUMAN	Hydroxyacyl-coenzyme A dehydrogenase, mitochondrial OS=Homo sapiens GN=HADH PE=1 SV=3	0.950805	0.46105	0.26971	0.367194	0.444029	0.0487374	1.10922	1.05284	1.02248	1.30501	0.115112
sp|P33991|MCM4_HUMAN	DNA replication licensing factor MCM4 OS=Homo sapiens GN=MCM4 PE=1 SV=5	27.7612	6.00602e-07	0.188491	0.122002	0.109752	0	0.921632	1.12351	0.885947	0.272502	0.0775663
sp|O75526|HNRGT_HUMAN	RNA-binding motif protein, X-linked-like-2 OS=Homo sapiens GN=RBMXL2 PE=1 SV=3	2.78171	0.0634902	0.0679691	0.0665669	0.0651136	0.056257	1.58504	1.59733	1.61735	1.62058	0.0715061
sp|P50990|TCPQ_HUMAN	T-complex protein 1 subunit theta OS=Homo sapiens GN=CCT8 PE=1 SV=4	2.53285	0.0818724	0.110213	0.0615622	0.0599897	0.0701229	1.2582	1.33761	1.36241	1.31072	0.155614
sp|P61160|ARP2_HUMAN	Actin-related protein 2 OS=Homo sapiens GN=ACTR2 PE=1 SV=1	2.02524	0.140128	0.200551	0.0840412	0.0809504	0.0657654	1.14528	1.24293	1.25543	1.26003	0.110733
sp|O15143|ARC1B_HUMAN	Actin-related protein 2/3 complex subunit 1B OS=Homo sapiens GN=ARPC1B PE=1 SV=3	2.00905	0.142606	0.111567	0.159252	0.0689463	0.0724134	1.3857	1.31277	1.4945	1.45553	0.208838
sp|Q15185|TEBP_HUMAN	Prostaglandin E synthase 3 OS=Homo sapiens GN=PTGES3 PE=1 SV=1	1.95795	0.15074	0.148462	0.0882788	0.0654855	0.118324	1.30543	1.50639	1.68383	1.35695	0.209967
sp|Q10713|MPPA_HUMAN	Mitochondrial-processing peptidase subunit alpha OS=Homo sapiens GN=PMPCA PE=1 SV=2	1.94024	0.153675	0.0602805	0.102526	0.154256	0.0747374	0.521601	0.441422	0.611793	0.551955	0.296602
sp|P29350|PTN6_HUMAN	Tyrosine-protein phosphatase non-receptor type 6 OS=Homo sapiens GN=PTPN6 PE=1 SV=1	1.83985	0.171499	0.0781625	0.175089	0.061157	0.157821	1.23638	0.862309	1.27285	0.854193	0.146111
sp|Q14161|GIT2_HUMAN	ARF GTPase-activating protein GIT2 OS=Homo sapiens GN=GIT2 PE=1 SV=2	1.69091	0.202098	0.0761219	0.112357	0.102655	0.21667	1.54123	1.45954	1.48582	1.27421	0.0676556
sp|P51572|BAP31_HUMAN	B-cell receptor-associated protein 31 OS=Homo sapiens GN=BCAP31 PE=1 SV=3	1.68611	0.203173	0.372863	0.0674275	0.088719	0.0851173	0.911807	0.53283	0.618051	0.569897	0.220286
sp|Q96AE4|FUBP1_HUMAN	Far upstream element-binding protein 1 OS=Homo sapiens GN=FUBP1 PE=1 SV=3	1.66758	0.207388	0.223066	0.0674088	0.161074	0.077933	1.20223	0.702863	1.24822	0.71276	0.204506
sp|P17096|HMGA1_HUMAN	High mobility group protein HMG-I/HMG-Y OS=Homo sapiens GN=HMGA1 PE=1 SV=3	1.66675	0.207579	0.246132	0.0513564	0.262335	0.0619218	0.802883	0.63384	0.839233	1.57791	0.25896
sp|P05114|HMGN1_HUMAN	Non-histone chromosomal protein HMG-14 OS=Homo sapiens GN=HMGN1 PE=1 SV=3	1.59628	0.224478	0.162863	0.107699	0.0806818	0.149989	1.48058	0.68637	1.78118	1.49198	0.246668
sp|Q15758|AAAT_HUMAN	Neutral amino acid transporter B(0) OS=Homo sapiens GN=SLC1A5 PE=1 SV=2	1.54545	0.237552	0.372843	0.07116	0.0985227	0.116078	1.07934	0.619756	1.43197	1.36953	0.158441
sp|P15259|PGAM2_HUMAN	Phosphoglycerate mutase 2 OS=Homo sapiens GN=PGAM2 PE=1 SV=3	1.54314	0.238164	0.158404	0.370776	0.0594628	0.0983464	1.28905	0.949547	1.47326	1.38078	0.189311
sp|P23258|TBG1_HUMAN	Tubulin gamma-1 chain OS=Homo sapiens GN=TUBG1 PE=1 SV=2	1.53206	0.241124	0.127689	0.444827	0.0666219	0.0772514	0.630183	1.07176	0.384794	0.405049	0.251803
sp|O75368|SH3L1_HUMAN	SH3 domain-binding glutamic acid-rich-like protein OS=Homo sapiens GN=SH3BGRL PE=1 SV=1	1.52658	0.242604	0.0689362	0.0809729	0.185888	0.323263	1.55878	1.49643	1.31566	1.16349	0.164242
sp|P30086|PEBP1_HUMAN	Phosphatidylethanolamine-binding protein 1 OS=Homo sapiens GN=PEBP1 PE=1 SV=3	1.52607	0.242743	0.174613	0.0533957	0.106705	0.424592	1.14347	1.26	1.19493	1.02512	0.111056
sp|P28838|AMPL_HUMAN	Cytosol aminopeptidase OS=Homo sapiens GN=LAP3 PE=1 SV=3	1.52182	0.243896	0.065087	0.16826	0.159401	0.156436	1.46771	1.28456	1.30044	0.762981	0.178686
sp|P68371|TBB2C_HUMAN	Tubulin beta-2C chain OS=Homo sapiens GN=TUBB2C PE=1 SV=1	1.51199	0.246585	0.0610155	0.146969	0.189835	0.118022	0.660143	0.768724	0.797319	0.72406	0.107401
sp|P07910|HNRPC_HUMAN	Heterogeneous nuclear ribonucleoproteins C1/C2 OS=Homo sapiens GN=HNRNPC PE=1 SV=4	1.49728	0.250668	0.116219	0.105865	0.136271	0.161743	1.25757	1.28804	1.25138	0.804962	0.170637
sp|O76021|RL1D1_HUMAN	Ribosomal L1 domain-containing protein 1 OS=Homo sapiens GN=RSL1D1 PE=1 SV=3	1.49637	0.250923	0.335358	0.436932	0.0512913	0.0597765	0.781989	1.43594	0.308433	0.380596	0.305063
sp|Q9H9B4|SFXN1_HUMAN	Sideroflexin-1 OS=Homo sapiens GN=SFXN1 PE=1 SV=4	1.48313	0.254663	0.114323	0.0809542	0.281725	0.0948156	0.526315	0.37788	0.941705	2.02418	0.297311
sp|P13639|EF2_HUMAN	Elongation factor 2 OS=Homo sapiens GN=EEF2 PE=1 SV=4	1.47523	0.256919	0.137756	0.221384	0.0550103	0.219698	1.11238	1.0765	1.17633	0.919608	0.108288
sp|P26196|DDX6_HUMAN	Probable ATP-dependent RNA helicase DDX6 OS=Homo sapiens GN=DDX6 PE=1 SV=2	1.46662	0.259405	0.103985	0.0638447	0.164855	0.386793	1.52834	1.67272	1.41248	1.14096	0.146496
sp|O00232|PSD12_HUMAN	26S proteasome non-ATPase regulatory subunit 12 OS=Homo sapiens GN=PSMD12 PE=1 SV=3	1.46221	0.260687	0.343279	0.0647521	0.270537	0.0723911	1.17685	1.88546	1.27536	0.497282	0.16882
sp|Q14204|DYHC1_HUMAN	Cytoplasmic dynein 1 heavy chain 1 OS=Homo sapiens GN=DYNC1H1 PE=1 SV=5	1.44485	0.265796	0.141354	0.312254	0.140217	0.0501676	0.517336	1.39369	0.738865	0.312341	0.45386
sp|O43488|ARK72_HUMAN	Aflatoxin B1 aldehyde reductase member 2 OS=Homo sapiens GN=AKR7A2 PE=1 SV=3	1.44334	0.266246	0.442901	0.0671656	0.0556302	0.285263	1.13106	0.518609	0.419255	1.35282	0.178768
sp|P22061|PIMT_HUMAN	Protein-L-isoaspartate(D-aspartate) O-methyltransferase OS=Homo sapiens GN=PCMT1 PE=1 SV=4	1.43149	0.269798	0.116344	0.06855	0.136529	0.245765	0.698165	0.618229	0.714897	0.821885	0.167062
sp|P19623|SPEE_HUMAN	Spermidine synthase OS=Homo sapiens GN=SRM PE=1 SV=1	1.42317	0.272321	0.164826	0.0597381	0.481178	0.103061	0.597367	1.65825	0.955491	0.478421	0.203496
sp|Q9UN86|G3BP2_HUMAN	Ras GTPase-activating protein-binding protein 2 OS=Homo sapiens GN=G3BP2 PE=1 SV=2	1.39035	0.282511	0.213868	0.0771469	0.146105	0.120827	0.932021	0.37544	0.616662	0.369701	0.260165
sp|Q15366|PCBP2_HUMAN	Poly(rC)-binding protein 2 OS=Homo sapiens GN=PCBP2 PE=1 SV=1	1.38888	0.282976	0.0529787	0.172647	0.394277	0.139966	1.44977	1.23457	1.07931	0.764371	0.146122
sp|Q99471|PFD5_HUMAN	Prefoldin subunit 5 OS=Homo sapiens GN=PFDN5 PE=1 SV=2	1.38463	0.284324	0.0730658	0.284986	0.0531715	0.407263	0.493161	0.769332	0.595617	1.08916	0.20174
sp|Q9ULV4|COR1C_HUMAN	Coronin-1C OS=Homo sapiens GN=CORO1C PE=1 SV=1	1.38164	0.285279	0.101857	0.124892	0.123481	0.252134	1.81684	1.62018	1.8253	1.15941	0.286487
sp|P17980|PRS6A_HUMAN	26S protease regulatory subunit 6A OS=Homo sapiens GN=PSMC3 PE=1 SV=3	1.37723	0.286691	0.136954	0.1087	0.0841942	0.459587	1.21671	1.2615	1.29164	0.983462	0.133179
sp|P08238|HS90B_HUMAN	Heat shock protein HSP 90-beta OS=Homo sapiens GN=HSP90AB1 PE=1 SV=4	1.36058	0.292087	0.434739	0.262984	0.0827893	0.0653073	1.01818	0.933681	1.15679	1.16598	0.106836
sp|Q99613|EIF3C_HUMAN	Eukaryotic translation initiation factor 3 subunit C OS=Homo sapiens GN=EIF3C PE=1 SV=1	1.35775	0.293014	0.155716	0.0785126	0.307428	0.108223	0.772344	1.40797	1.1551	0.720979	0.129215
sp|B0I1T2|MYO1G_HUMAN	Myosin-Ig OS=Homo sapiens GN=MYO1G PE=1 SV=2	1.35762	0.293056	0.369536	0.224602	0.0544112	0.131073	1.29858	1.86478	2.57426	0.633549	0.226493
sp|Q96IX5|USMG5_HUMAN	Up-regulated during skeletal muscle growth protein 5 OS=Homo sapiens GN=USMG5 PE=1 SV=1	1.34989	0.295604	0.068501	0.243396	0.415919	0.0823799	1.73898	1.28142	0.908181	1.66587	0.134549
sp|O14561|ACPM_HUMAN	Acyl carrier protein, mitochondrial OS=Homo sapiens GN=NDUFAB1 PE=1 SV=3	1.3474	0.296429	0.0881044	0.10058	0.111477	0.376726	0.44495	0.466361	0.515852	0.772256	0.229552
sp|P11177|ODPB_HUMAN	Pyruvate dehydrogenase E1 component subunit beta, mitochondrial OS=Homo sapiens GN=PDHB PE=1 SV=3	1.34271	0.297991	0.0989749	0.071029	0.454494	0.149263	0.421611	0.519678	1.04921	1.64936	0.265675
sp|Q9ULZ3|ASC_HUMAN	Apoptosis-associated speck-like protein containing a CARD OS=Homo sapiens GN=PYCARD PE=1 SV=2	1.33859	0.29937	0.0565377	0.359233	0.196436	0.135464	1.59668	1.114	1.29373	1.39843	0.208387
sp|P46109|CRKL_HUMAN	Crk-like protein OS=Homo sapiens GN=CRKL PE=1 SV=1	1.32356	0.304452	0.105464	0.495725	0.0608988	0.249318	1.59566	1.08407	1.79996	1.29043	0.11693
sp|Q9UBE0|SAE1_HUMAN	SUMO-activating enzyme subunit 1 OS=Homo sapiens GN=SAE1 PE=1 SV=1	1.32291	0.304674	0.172195	0.408821	0.102603	0.0644022	0.767789	0.990112	0.685443	0.62064	0.149775
sp|P31943|HNRH1_HUMAN	Heterogeneous nuclear ribonucleoprotein H OS=Homo sapiens GN=HNRNPH1 PE=1 SV=4	1.29519	0.314281	0.476451	0.0642657	0.396684	0.0772402	1.00149	1.2945	0.947163	0.748633	0.104492
sp|P11279|LAMP1_HUMAN	Lysosome-associated membrane glycoprotein 1 OS=Homo sapiens GN=LAMP1 PE=1 SV=3	1.28415	0.31819	0.195716	0.455182	0.0731405	0.111665	1.36377	1.02615	1.69366	1.5668	0.154532
sp|Q02790|FKBP4_HUMAN	Peptidyl-prolyl cis-trans isomerase FKBP4 OS=Homo sapiens GN=FKBP4 PE=1 SV=3	1.28394	0.318268	0.212737	0.206707	0.109256	0.0819777	0.815383	0.815839	0.69747	0.66232	0.241286
sp|P46782|RS5_HUMAN	40S ribosomal protein S5 OS=Homo sapiens GN=RPS5 PE=1 SV=4	1.2591	0.327243	0.0896422	0.0688494	0.325372	0.437184	1.5236	1.67138	1.17581	1.05083	0.240434
sp|Q9Y5L0|TNPO3_HUMAN	Transportin-3 OS=Homo sapiens GN=TNPO3 PE=1 SV=3	1.25206	0.329832	0.0688685	0.384986	0.164483	0.114972	0.612455	1.19745	0.625299	0.517439	0.196607
sp|P50502|F10A1_HUMAN	Hsc70-interacting protein OS=Homo sapiens GN=ST13 PE=1 SV=2	1.24073	0.334042	0.474014	0.385828	0.0598244	0.100089	0.994209	0.941839	1.41779	1.3225	0.125018
sp|P24534|EF1B_HUMAN	Elongation factor 1-beta OS=Homo sapiens GN=EEF1B2 PE=1 SV=3	1.23414	0.336518	0.174101	0.0646492	0.175331	0.378503	1.30922	1.546	1.30897	0.923154	0.216398
sp|P68036|UB2L3_HUMAN	Ubiquitin-conjugating enzyme E2 L3 OS=Homo sapiens GN=UBE2L3 PE=1 SV=1	1.22483	0.340038	0.069942	0.176614	0.323688	0.154894	1.41002	1.25509	0.910659	0.778068	0.137649
sp|P40939|ECHA_HUMAN	Trifunctional enzyme subunit alpha, mitochondrial OS=Homo sapiens GN=HADHA PE=1 SV=2	1.22433	0.340229	0.11028	0.24015	0.379205	0.0693073	1.21194	1.11878	0.956477	1.24568	0.114588
sp|O43684|BUB3_HUMAN	Mitotic checkpoint protein BUB3 OS=Homo sapiens GN=BUB3 PE=1 SV=1	1.22197	0.341129	0.106267	0.140094	0.159194	0.23895	1.64328	1.52372	1.38795	0.506327	0.222859
sp|P04844|RPN2_HUMAN	Dolichyl-diphosphooligosaccharide--protein glycosyltransferase subunit 2 OS=Homo sapiens GN=RPN2 PE=1 SV=3	1.21659	0.343189	0.489865	0.107502	0.251684	0.0658771	1.00617	1.20917	0.910327	1.23769	0.116316
sp|Q5VYJ4|RUEL1_HUMAN	Putative small nuclear ribonucleoprotein polypeptide E-like protein 1 OS=Homo sapiens GN=SNRPEL1 PE=5 SV=1	1.21496	0.343817	0.334681	0.112862	0.179298	0.0804693	0.821277	0.540861	0.732767	0.45443	0.230476
sp|P10515|ODP2_HUMAN	Dihydrolipoyllysine-residue acetyltransferase component of pyruvate dehydrogenase complex, mitochondrial OS=Homo sapiens GN=DLAT PE=1 SV=3	1.20672	0.346999	0.0524758	0.148438	0.198595	0.364123	0.588253	0.717362	0.771051	1.09355	0.171974
sp|P62829|RL23_HUMAN	60S ribosomal protein L23 OS=Homo sapiens GN=RPL23 PE=1 SV=1	1.19561	0.351336	0.290406	0.224228	0.067469	0.173687	1.1893	1.54538	2.15797	1.37971	0.229971
sp|P60866|RS20_HUMAN	40S ribosomal protein S20 OS=Homo sapiens GN=RPS20 PE=1 SV=1	1.18156	0.356898	0.466402	0.141375	0.0540496	0.369631	0.963641	1.33818	1.59496	1.07656	0.142448
sp|O14579|COPE_HUMAN	Coatomer subunit epsilon OS=Homo sapiens GN=COPE PE=1 SV=3	1.15949	0.365806	0.0877273	0.316258	0.395072	0.0847821	1.55796	1.17934	1.13909	1.53663	0.103996
sp|O15173|PGRC2_HUMAN	Membrane-associated progesterone receptor component 2 OS=Homo sapiens GN=PGRMC2 PE=1 SV=1	1.15843	0.366242	0.110687	0.425669	0.250351	0.0723575	1.62748	1.1436	0.742935	1.76768	0.130139
sp|Q86VP6|CAND1_HUMAN	Cullin-associated NEDD8-dissociated protein 1 OS=Homo sapiens GN=CAND1 PE=1 SV=2	1.14987	0.369755	0.199662	0.134864	0.0993595	0.209743	0.859813	1.21343	0.783397	0.855124	0.160146
sp|P47756|CAPZB_HUMAN	F-actin-capping protein subunit beta OS=Homo sapiens GN=CAPZB PE=1 SV=4	1.14747	0.37075	0.126306	0.139373	0.17969	0.190056	1.5358	0.620222	1.41617	1.37567	0.185041
sp|Q99733|NP1L4_HUMAN	Nucleosome assembly protein 1-like 4 OS=Homo sapiens GN=NAP1L4 PE=1 SV=1	1.1286	0.378636	0.104178	0.0859963	0.471043	0.196615	0.768233	0.740225	1.03967	1.18113	0.138197
sp|P61758|PFD3_HUMAN	Prefoldin subunit 3 OS=Homo sapiens GN=VBP1 PE=1 SV=3	1.11363	0.385006	0.312524	0.400889	0.0647417	0.143654	1.10059	0.911268	1.4374	1.26598	0.137032
sp|Q9UJU6|DBNL_HUMAN	Drebrin-like protein OS=Homo sapiens GN=DBNL PE=1 SV=1	1.11022	0.38647	0.0777369	0.495239	0.0963223	0.460927	1.60264	1.02521	1.55241	1.06209	0.188868
tr|Q32Q12|Q32Q12_HUMAN	Nucleoside diphosphate kinase OS=Homo sapiens GN=NME1-NME2 PE=2 SV=1	1.10181	0.39011	0.0601934	0.202572	0.272934	0.212626	0.654892	0.8174	1.16754	1.22736	0.216753
sp|Q96G03|PGM2_HUMAN	Phosphoglucomutase-2 OS=Homo sapiens GN=PGM2 PE=1 SV=4	1.09262	0.394118	0.226441	0.0747053	0.261281	0.182302	1.18621	0.669843	1.1723	1.24183	0.146457
sp|P67809|YBOX1_HUMAN	Nuclease-sensitive element-binding protein 1 OS=Homo sapiens GN=YBX1 PE=1 SV=3	1.08573	0.397153	0.238385	0.446202	0.114597	0.0812626	1.17343	0.978792	0.756667	0.700861	0.229051
sp|P61353|RL27_HUMAN	60S ribosomal protein L27 OS=Homo sapiens GN=RPL27 PE=1 SV=2	1.08266	0.398511	0.176383	0.128709	0.257965	0.115486	0.606848	0.76324	1.34518	1.69362	0.163427
sp|Q07955|SRSF1_HUMAN	Serine/arginine-rich splicing factor 1 OS=Homo sapiens GN=SRSF1 PE=1 SV=2	1.06731	0.405368	0.431267	0.0924602	0.251942	0.115285	1.05202	1.32932	1.15449	1.27584	0.164792
sp|P14174|MIF_HUMAN	Macrophage migration inhibitory factor OS=Homo sapiens GN=MIF PE=1 SV=4	1.05519	0.410855	0.20354	0.056174	0.300651	0.447698	1.35661	1.72043	1.29599	1.02818	0.205121
sp|Q9H3N1|TMX1_HUMAN	Thioredoxin-related transmembrane protein 1 OS=Homo sapiens GN=TMX1 PE=1 SV=1	1.04583	0.415147	0.403656	0.138513	0.398481	0.0596536	1.17891	0.740392	0.897403	0.471694	0.259538
sp|P78344|IF4G2_HUMAN	Eukaryotic translation initiation factor 4 gamma 2 OS=Homo sapiens GN=EIF4G2 PE=1 SV=1	1.04339	0.416272	0.236712	0.346932	0.286952	0.0531173	1.34917	1.17306	1.26585	0.516825	0.110322
sp|Q71UI9|H2AV_HUMAN	Histone H2A.V OS=Homo sapiens GN=H2AFV PE=1 SV=3	1.03496	0.420177	0.238859	0.103414	0.148099	0.244559	1.30692	0.766303	1.49836	1.29354	0.350911
sp|P08579|RU2B_HUMAN	U2 small nuclear ribonucleoprotein B'' OS=Homo sapiens GN=SNRPB2 PE=1 SV=1	1.03438	0.420446	0.294226	0.284733	0.271415	0.0501341	0.827863	1.26146	0.773027	0.478631	0.181987
sp|Q15365|PCBP1_HUMAN	Poly(rC)-binding protein 1 OS=Homo sapiens GN=PCBP1 PE=1 SV=2	1.03196	0.421577	0.251054	0.129308	0.182376	0.155274	1.11168	1.17559	1.14053	0.86178	0.0984143
sp|Q9Y5L4|TIM13_HUMAN	Mitochondrial import inner membrane translocase subunit Tim13 OS=Homo sapiens GN=TIMM13 PE=1 SV=1	1.03126	0.421903	0.38058	0.100608	0.161312	0.180268	1.10592	1.41559	1.31467	1.29002	0.169276
sp|P41250|SYG_HUMAN	Glycyl-tRNA synthetase OS=Homo sapiens GN=GARS PE=1 SV=3	1.02841	0.423238	0.236238	0.138634	0.287882	0.0995307	0.768154	1.725	1.36807	1.78691	0.32012
sp|A6NIZ1|RP1BL_HUMAN	Ras-related protein Rap-1b-like protein OS=Homo sapiens PE=2 SV=1	1.02412	0.425249	0.21647	0.375865	0.104163	0.132682	1.39495	0.999772	1.70509	1.59001	0.254166
sp|Q9UM00|TMCO1_HUMAN	Transmembrane and coiled-coil domain-containing protein 1 OS=Homo sapiens GN=TMCO1 PE=1 SV=1	1.01899	0.42767	0.471141	0.166109	0.16001	0.103408	1.04472	1.35536	1.37235	1.47419	0.0876839
sp|P06454|PTMA_HUMAN	Prothymosin alpha OS=Homo sapiens GN=PTMA PE=1 SV=2	1.00652	0.433608	0.284284	0.16753	0.322004	0.0727933	1.17029	0.84884	1.13217	0.633922	0.346913
sp|P10768|ESTD_HUMAN	S-formylglutathione hydrolase OS=Homo sapiens GN=ESD PE=1 SV=2	1.00466	0.434499	0.300745	0.124238	0.478988	0.085419	1.16463	1.41385	0.996165	0.652203	0.16798
sp|P62277|RS13_HUMAN	40S ribosomal protein S13 OS=Homo sapiens GN=RPS13 PE=1 SV=2	1.00284	0.435376	0.104623	0.113901	0.418667	0.200458	0.724519	0.71815	0.963384	1.21413	0.196812
sp|P12268|IMDH2_HUMAN	Inosine-5'-monophosphate dehydrogenase 2 OS=Homo sapiens GN=IMPDH2 PE=1 SV=2	0.999389	0.437036	0.322979	0.0586342	0.246684	0.299453	1.0726	1.24923	0.919429	0.930972	0.134774
sp|P04075|ALDOA_HUMAN	Fructose-bisphosphate aldolase A OS=Homo sapiens GN=ALDOA PE=1 SV=2	0.999312	0.437073	0.112389	0.206361	0.148223	0.296134	1.12506	0.917414	1.11329	1.0498	0.110247
sp|Q9Y224|CN166_HUMAN	UPF0568 protein C14orf166 OS=Homo sapiens GN=C14orf166 PE=1 SV=1	0.996328	0.438515	0.169226	0.461674	0.482541	0.0558324	1.21803	1.04242	1.01565	0.689946	0.123784
sp|P05386|RLA1_HUMAN	60S acidic ribosomal protein P1 OS=Homo sapiens GN=RPLP1 PE=1 SV=1	0.992327	0.440456	0.216673	0.0619177	0.483512	0.21838	0.825773	0.652423	1.02175	0.816742	0.0935417
sp|P26447|S10A4_HUMAN	Protein S100-A4 OS=Homo sapiens GN=S100A4 PE=1 SV=1	0.990259	0.441461	0.092147	0.164163	0.439019	0.18733	2.46436	0.809979	1.07961	1.74685	0.218995
sp|P31146|COR1A_HUMAN	Coronin-1A OS=Homo sapiens GN=CORO1A PE=1 SV=4	0.9878	0.44266	0.33147	0.429878	0.0995971	0.109855	1.13682	1.07348	1.40481	1.38834	0.235769
sp|P23526|SAHH_HUMAN	Adenosylhomocysteinase OS=Homo sapiens GN=AHCY PE=1 SV=4	0.982521	0.445243	0.0801741	0.201272	0.210558	0.428279	1.42693	1.29522	1.22642	0.946178	0.209115
sp|P04350|TBB4_HUMAN	Tubulin beta-4 chain OS=Homo sapiens GN=TUBB4 PE=1 SV=2	0.98024	0.446364	0.28588	0.175931	0.0762293	0.483341	1.09514	1.1564	1.27115	0.99927	0.148811
sp|P30041|PRDX6_HUMAN	Peroxiredoxin-6 OS=Homo sapiens GN=PRDX6 PE=1 SV=3	0.975453	0.448723	0.241876	0.212208	0.217593	0.0987263	1.1145	1.13465	1.12597	1.20763	0.1386
sp|Q8NBX0|SCPDH_HUMAN	Probable saccharopine dehydrogenase OS=Homo sapiens GN=SCCPDH PE=1 SV=1	0.969794	0.451527	0.0845455	0.243022	0.276054	0.213944	1.59627	1.27472	1.25173	1.31736	0.102647
sp|P08758|ANXA5_HUMAN	Annexin A5 OS=Homo sapiens GN=ANXA5 PE=1 SV=2	0.967661	0.452588	0.220677	0.406202	0.139669	0.0906816	0.788349	0.985392	0.740959	1.49943	0.427419
sp|P53621|COPA_HUMAN	Coatomer subunit alpha OS=Homo sapiens GN=COPA PE=1 SV=2	0.963803	0.454513	0.433346	0.127811	0.163977	0.153006	1.23231	1.99819	2.0213	1.76148	0.282496
sp|P40925|MDHC_HUMAN	Malate dehydrogenase, cytoplasmic OS=Homo sapiens GN=MDH1 PE=1 SV=4	0.962976	0.454926	0.196673	0.422844	0.124308	0.131676	1.18093	0.990614	1.26255	1.2475	0.203817
sp|O00584|RNT2_HUMAN	Ribonuclease T2 OS=Homo sapiens GN=RNASET2 PE=1 SV=2	0.956655	0.458098	0.216847	0.455304	0.130558	0.115285	1.24101	0.971535	1.36224	1.36393	0.12458
sp|P00491|PNPH_HUMAN	Purine nucleoside phosphorylase OS=Homo sapiens GN=PNP PE=1 SV=2	0.942636	0.465201	0.0876499	0.404415	0.101012	0.407095	0.78647	0.977269	0.793941	0.956844	0.16873
sp|Q13155|AIMP2_HUMAN	Aminoacyl tRNA synthase complex-interacting multifunctional protein 2 OS=Homo sapiens GN=AIMP2 PE=1 SV=2	0.935886	0.468656	0.150242	0.100159	0.281973	0.23857	0.735811	0.650432	0.820735	0.775946	0.14587
sp|P62906|RL10A_HUMAN	60S ribosomal protein L10a OS=Homo sapiens GN=RPL10A PE=1 SV=2	0.929617	0.471884	0.159632	0.113901	0.344607	0.17486	0.740111	0.676519	1.06914	0.732907	0.20927
sp|Q8WXX5|DNJC9_HUMAN	DnaJ homolog subfamily C member 9 OS=Homo sapiens GN=DNAJC9 PE=1 SV=1	0.928725	0.472345	0.160397	0.215304	0.276064	0.121631	1.47204	0.725715	1.24737	0.539669	0.152436
sp|P00338|LDHA_HUMAN	L-lactate dehydrogenase A chain OS=Homo sapiens GN=LDHA PE=1 SV=2	0.922826	0.475403	0.124681	0.226249	0.288626	0.125542	0.831986	0.894677	0.914225	0.827117	0.166677
sp|P08708|RS17_HUMAN	40S ribosomal protein S17 OS=Homo sapiens GN=RPS17 PE=1 SV=2	0.922285	0.475684	0.458985	0.12377	0.226002	0.117687	0.988117	0.773856	1.21209	1.30058	0.164202
sp|P13798|ACPH_HUMAN	Acylamino-acid-releasing enzyme OS=Homo sapiens GN=APEH PE=1 SV=4	0.916879	0.478504	0.161393	0.0816745	0.342283	0.437464	3.09478	2.7058	1.41666	1.21577	0.304079
sp|Q96C19|EFHD2_HUMAN	EF-hand domain-containing protein D2 OS=Homo sapiens GN=EFHD2 PE=1 SV=1	0.912618	0.480736	0.151431	0.144125	0.308192	0.177777	1.45036	0.758666	1.21075	0.735906	0.251228
sp|P35998|PRS7_HUMAN	26S protease regulatory subunit 7 OS=Homo sapiens GN=PSMC2 PE=1 SV=3	0.911803	0.481164	0.060648	0.286389	0.459969	0.264581	2.31431	1.39269	0.945917	1.34988	0.277649
sp|P55209|NP1L1_HUMAN	Nucleosome assembly protein 1-like 1 OS=Homo sapiens GN=NAP1L1 PE=1 SV=1	0.905492	0.484489	0.0837911	0.430655	0.197076	0.247911	1.47997	1.05915	1.2666	1.2177	0.163252
sp|Q9UJZ1|STML2_HUMAN	Stomatin-like protein 2 OS=Homo sapiens GN=STOML2 PE=1 SV=1	0.895338	0.48988	0.191963	0.29232	0.203812	0.100056	0.795138	0.847586	0.743793	1.48478	0.193425
sp|O60888|CUTA_HUMAN	Protein CutA OS=Homo sapiens GN=CUTA PE=1 SV=2	0.891674	0.491838	0.277215	0.0994855	0.260145	0.208525	1.18354	1.46137	1.19857	0.707905	0.134188
sp|P84077|ARF1_HUMAN	ADP-ribosylation factor 1 OS=Homo sapiens GN=ARF1 PE=1 SV=2	0.891618	0.491868	0.441896	0.111366	0.179112	0.200235	1.12365	1.83583	1.5399	1.50275	0.252868
sp|Q5JTV8|TOIP1_HUMAN	Torsin-1A-interacting protein 1 OS=Homo sapiens GN=TOR1AIP1 PE=1 SV=2	0.88679	0.494459	0.0994487	0.330402	0.162097	0.300067	2.14516	0.95831	1.8808	1.30635	0.266023
sp|Q92820|GGH_HUMAN	Gamma-glutamyl hydrolase OS=Homo sapiens GN=GGH PE=1 SV=2	0.885938	0.494917	0.301557	0.0887652	0.265475	0.192235	1.14853	0.671249	0.839408	1.28596	0.163496
sp|Q9H488|OFUT1_HUMAN	GDP-fucose protein O-fucosyltransferase 1 OS=Homo sapiens GN=POFUT1 PE=1 SV=1	0.885701	0.495044	0.19588	0.0848457	0.272789	0.476771	1.38397	1.9791	1.20009	0.951215	0.140396
sp|P19105|ML12A_HUMAN	Myosin regulatory light chain 12A OS=Homo sapiens GN=MYL12A PE=1 SV=2	0.884073	0.495921	0.17234	0.183732	0.288006	0.149073	1.51521	1.39553	1.25642	1.51576	0.288832
sp|P62841|RS15_HUMAN	40S ribosomal protein S15 OS=Homo sapiens GN=RPS15 PE=1 SV=2	0.876995	0.499749	0.253627	0.105332	0.447355	0.14762	0.904744	1.21816	1.02862	1.17221	0.0681299
sp|Q71UM5|RS27L_HUMAN	40S ribosomal protein S27-like OS=Homo sapiens GN=RPS27L PE=1 SV=3	0.870406	0.503334	0.157824	0.151787	0.310857	0.195117	1.3478	1.36326	1.1676	1.28764	0.0559671
sp|P16401|H15_HUMAN	Histone H1.5 OS=Homo sapiens GN=HIST1H1B PE=1 SV=3	0.869252	0.503964	0.094236	0.187493	0.194494	0.380469	0.775733	0.848059	0.863508	1.05823	0.140972
sp|Q9HA77|SYCM_HUMAN	Probable cysteinyl-tRNA synthetase, mitochondrial OS=Homo sapiens GN=CARS2 PE=1 SV=1	0.866061	0.50571	0.199168	0.460842	0.133533	0.12467	0.623501	0.965849	0.687849	0.647097	0.203404
sp|P62750|RL23A_HUMAN	60S ribosomal protein L23a OS=Homo sapiens GN=RPL23A PE=1 SV=1	0.851582	0.513696	0.344584	0.0565201	0.391012	0.323151	1.09965	0.642153	1.07189	1.11398	0.21757
sp|P62857|RS28_HUMAN	40S ribosomal protein S28 OS=Homo sapiens GN=RPS28 PE=1 SV=1	0.841974	0.519051	0.212118	0.494163	0.0773347	0.362034	1.25532	0.953931	1.54938	1.04108	0.211292
sp|Q562R1|ACTBL_HUMAN	Beta-actin-like protein 2 OS=Homo sapiens GN=ACTBL2 PE=1 SV=2	0.836165	0.522311	0.417021	0.49102	0.094969	0.147698	0.93595	1.02608	1.66741	1.56381	0.214571
sp|Q9H853|TBA4B_HUMAN	Putative tubulin-like protein alpha-4B OS=Homo sapiens GN=TUBA4B PE=5 SV=2	0.833497	0.523814	0.246064	0.0875959	0.341849	0.272112	2.51459	3.29567	1.91002	2.22871	0.268701
sp|P0C0S5|H2AZ_HUMAN	Histone H2A.Z OS=Homo sapiens GN=H2AFZ PE=1 SV=2	0.827621	0.527136	0.280764	0.0968195	0.497304	0.162547	1.27986	0.620446	1.00259	1.51782	0.137602
sp|P32119|PRDX2_HUMAN	Peroxiredoxin-2 OS=Homo sapiens GN=PRDX2 PE=1 SV=5	0.826088	0.528006	0.0602031	0.270131	0.3778	0.303955	0.579562	0.824622	0.897591	0.826436	0.127904
sp|P62081|RS7_HUMAN	40S ribosomal protein S7 OS=Homo sapiens GN=RPS7 PE=1 SV=1	0.824518	0.528898	0.320832	0.103601	0.360176	0.144905	0.909078	0.775816	0.93208	0.777713	0.223411
sp|P35613|BASI_HUMAN	Basigin OS=Homo sapiens GN=BSG PE=1 SV=2	0.821334	0.53071	0.407602	0.379775	0.143492	0.104547	1.09008	1.14761	1.71341	1.79658	0.32186
sp|Q1KMD3|HNRL2_HUMAN	Heterogeneous nuclear ribonucleoprotein U-like protein 2 OS=Homo sapiens GN=HNRNPUL2 PE=1 SV=1	0.820797	0.531016	0.24205	0.252834	0.0924897	0.415821	1.26864	1.23449	1.49254	0.945805	0.164786
sp|P22307|NLTP_HUMAN	Non-specific lipid-transfer protein OS=Homo sapiens GN=SCP2 PE=1 SV=2	0.819997	0.531472	0.38088	0.430037	0.140702	0.105687	1.07384	0.944227	1.31738	1.37221	0.141601
sp|P84103|SRSF3_HUMAN	Serine/arginine-rich splicing factor 3 OS=Homo sapiens GN=SRSF3 PE=1 SV=1	0.813615	0.535124	0.266199	0.0677081	0.292583	0.410045	0.746834	0.485885	0.772345	0.926064	0.254942
sp|O14737|PDCD5_HUMAN	Programmed cell death protein 5 OS=Homo sapiens GN=PDCD5 PE=1 SV=3	0.812681	0.53566	0.433172	0.447278	0.0850517	0.153441	1.0859	0.958905	0.611634	0.738004	0.179017
sp|Q9NPF4|OSGEP_HUMAN	Probable tRNA threonylcarbamoyladenosine biosynthesis protein OSGEP OS=Homo sapiens GN=OSGEP PE=1 SV=1	0.80822	0.538226	0.294981	0.217025	0.432159	0.0837095	1.15684	1.24844	0.95292	0.621004	0.089694
sp|Q9H0U4|RAB1B_HUMAN	Ras-related protein Rab-1B OS=Homo sapiens GN=RAB1B PE=1 SV=1	0.807112	0.538865	0.125687	0.227633	0.40999	0.165922	1.41223	1.25182	0.962082	1.31356	0.173004
sp|O75531|BAF_HUMAN	Barrier-to-autointegration factor OS=Homo sapiens GN=BANF1 PE=1 SV=1	0.805522	0.539783	0.259971	0.400935	0.159112	0.122112	1.12357	0.931952	1.21798	1.24625	0.114367
sp|P28066|PSA5_HUMAN	Proteasome subunit alpha type-5 OS=Homo sapiens GN=PSMA5 PE=1 SV=3	0.804955	0.54011	0.219004	0.376595	0.0683471	0.38076	0.879152	0.93906	0.720618	0.93819	0.186489
sp|Q16576|RBBP7_HUMAN	Histone-binding protein RBBP7 OS=Homo sapiens GN=RBBP7 PE=1 SV=1	0.804952	0.540112	0.463491	0.100833	0.179721	0.236693	1.04313	0.677019	0.768623	0.810582	0.148402
sp|P62306|RUXF_HUMAN	Small nuclear ribonucleoprotein F OS=Homo sapiens GN=SNRPF PE=1 SV=1	0.80492	0.540131	0.377263	0.171993	0.364504	0.0965475	1.16928	1.59658	1.19312	0.689354	0.165349
sp|Q04760|LGUL_HUMAN	Lactoylglutathione lyase OS=Homo sapiens GN=GLO1 PE=1 SV=4	0.79762	0.544362	0.230213	0.30406	0.154669	0.166547	1.15369	1.09711	1.24912	1.22454	0.179254
sp|Q13185|CBX3_HUMAN	Chromobox protein homolog 3 OS=Homo sapiens GN=CBX3 PE=1 SV=4	0.790835	0.548319	0.174391	0.434481	0.367066	0.0901229	1.17558	0.970745	0.942938	0.772971	0.0725399
sp|P62826|RAN_HUMAN	GTP-binding nuclear protein Ran OS=Homo sapiens GN=RAN PE=1 SV=3	0.781715	0.553671	0.388104	0.145828	0.114029	0.495385	0.957704	1.23075	1.27763	1.00755	0.125249
sp|P62736|ACTA_HUMAN	Actin, aortic smooth muscle OS=Homo sapiens GN=ACTA2 PE=1 SV=1	0.778652	0.555478	0.408975	0.0723293	0.245837	0.376983	0.961365	0.753994	1.1317	1.05097	0.166307
sp|Q9Y3I0|RTCB_HUMAN	tRNA-splicing ligase RtcB homolog OS=Homo sapiens GN=C22orf28 PE=1 SV=1	0.774521	0.557922	0.460986	0.137942	0.230795	0.153553	1.0323	1.34984	0.78308	0.741756	0.180148
sp|P62263|RS14_HUMAN	40S ribosomal protein S14 OS=Homo sapiens GN=RPS14 PE=1 SV=3	0.769901	0.560665	0.433491	0.077493	0.212345	0.455229	1.02559	0.77181	1.13005	1.00718	0.111577
sp|Q9BXP5|SRRT_HUMAN	Serrate RNA effector molecule homolog OS=Homo sapiens GN=SRRT PE=1 SV=1	0.768697	0.561381	0.315106	0.422544	0.282448	0.0752291	1.26842	1.11224	1.28799	0.480166	0.246142
sp|Q15008|PSMD6_HUMAN	26S proteasome non-ATPase regulatory subunit 6 OS=Homo sapiens GN=PSMD6 PE=1 SV=1	0.768404	0.561556	0.140338	0.418821	0.12905	0.242559	0.629313	0.855132	0.520241	0.689513	0.179919
sp|O75489|NDUS3_HUMAN	NADH dehydrogenase [ubiquinone] iron-sulfur protein 3, mitochondrial OS=Homo sapiens GN=NDUFS3 PE=1 SV=1	0.766	0.562989	0.147089	0.410954	0.113347	0.279028	0.416861	1.29711	0.573594	0.705964	0.264815
sp|P62917|RL8_HUMAN	60S ribosomal protein L8 OS=Homo sapiens GN=RPL8 PE=1 SV=2	0.765168	0.563485	0.263317	0.320355	0.111901	0.236123	1.2158	1.16118	1.4114	1.2245	0.144385
sp|P56537|IF6_HUMAN	Eukaryotic translation initiation factor 6 OS=Homo sapiens GN=EIF6 PE=1 SV=1	0.763349	0.564572	0.124497	0.452853	0.250434	0.143084	0.590648	0.971529	0.772877	0.598748	0.162676
sp|P10599|THIO_HUMAN	Thioredoxin OS=Homo sapiens GN=TXN PE=1 SV=3	0.759253	0.567024	0.283878	0.397362	0.0904959	0.269888	1.16795	0.899453	1.54365	1.18333	0.168358
sp|P37802|TAGL2_HUMAN	Transgelin-2 OS=Homo sapiens GN=TAGLN2 PE=1 SV=3	0.756526	0.568662	0.381876	0.186717	0.150847	0.171877	1.02857	0.916425	0.904004	0.90886	0.0654198
sp|Q92522|H1X_HUMAN	Histone H1x OS=Homo sapiens GN=H1FX PE=1 SV=1	0.750797	0.572113	0.470338	0.436006	0.277645	0.0675419	1.05184	0.802253	1.17006	2.43641	0.208421
sp|Q99729|ROAA_HUMAN	Heterogeneous nuclear ribonucleoprotein A/B OS=Homo sapiens GN=HNRNPAB PE=1 SV=2	0.749399	0.572958	0.255764	0.111431	0.235403	0.283665	0.98048	0.532344	1.49295	1.34784	0.24417
sp|P60900|PSA6_HUMAN	Proteasome subunit alpha type-6 OS=Homo sapiens GN=PSMA6 PE=1 SV=1	0.746212	0.574887	0.305077	0.442947	0.435465	0.0652849	1.63093	1.20862	1.65867	3.07553	0.278737
sp|P63244|GBLP_HUMAN	Guanine nucleotide-binding protein subunit beta-2-like 1 OS=Homo sapiens GN=GNB2L1 PE=1 SV=3	0.742708	0.577012	0.110329	0.136885	0.433936	0.465285	0.711426	1.54528	0.972021	1.03509	0.257957
sp|P55072|TERA_HUMAN	Transitional endoplasmic reticulum ATPase OS=Homo sapiens GN=VCP PE=1 SV=4	0.742526	0.577123	0.367128	0.219504	0.121322	0.235598	1.04977	0.899241	1.17888	1.09802	0.123796
sp|P62701|RS4X_HUMAN	40S ribosomal protein S4, X isoform OS=Homo sapiens GN=RPS4X PE=1 SV=2	0.74125	0.577898	0.190435	0.327549	0.358926	0.10162	0.824565	1.09583	1.06731	1.2856	0.164736
sp|P06703|S10A6_HUMAN	Protein S100-A6 OS=Homo sapiens GN=S100A6 PE=1 SV=1	0.738444	0.579607	0.19825	0.100617	0.348988	0.469475	1.7125	2.17259	1.55116	1.14016	0.22558
sp|P54105|ICLN_HUMAN	Methylosome subunit pICln OS=Homo sapiens GN=CLNS1A PE=1 SV=1	0.729063	0.585345	0.426412	0.291862	0.325351	0.077933	0.970194	1.13954	1.10629	0.691442	0.146327
sp|P50897|PPT1_HUMAN	Palmitoyl-protein thioesterase 1 OS=Homo sapiens GN=PPT1 PE=1 SV=1	0.727029	0.586595	0.436789	0.357306	0.0694318	0.490324	0.98388	1.10079	1.48655	1.00775	0.175076
sp|Q15041|AR6P1_HUMAN	ADP-ribosylation factor-like protein 6-interacting protein 1 OS=Homo sapiens GN=ARL6IP1 PE=1 SV=2	0.721629	0.589921	0.215861	0.278036	0.197035	0.181799	1.23761	1.17835	1.26828	1.27087	0.0339315
sp|P62244|RS15A_HUMAN	40S ribosomal protein S15a OS=Homo sapiens GN=RPS15A PE=1 SV=2	0.714452	0.594363	0.10177	0.319177	0.235207	0.267609	0.494233	1.21208	0.661334	0.685906	0.234651
sp|Q96FW1|OTUB1_HUMAN	Ubiquitin thioesterase OTUB1 OS=Homo sapiens GN=OTUB1 PE=1 SV=2	0.71364	0.594867	0.476944	0.11754	0.146353	0.434246	0.984455	1.4447	0.727672	1.06336	0.179199
sp|P00403|COX2_HUMAN	Cytochrome c oxidase subunit 2 OS=Homo sapiens GN=MT-CO2 PE=1 SV=1	0.710375	0.596896	0.370725	0.123508	0.179153	0.260291	0.871624	0.811022	0.631363	0.745324	0.220228
sp|Q9HAV7|GRPE1_HUMAN	GrpE protein homolog 1, mitochondrial OS=Homo sapiens GN=GRPEL1 PE=1 SV=2	0.709326	0.597549	0.0734623	0.398868	0.391446	0.332905	1.45005	1.10694	1.07445	0.895722	0.200168
sp|O60264|SMCA5_HUMAN	SWI/SNF-related matrix-associated actin-dependent regulator of chromatin subfamily A member 5 OS=Homo sapiens GN=SMARCA5 PE=1 SV=1	0.707863	0.59846	0.198404	0.318672	0.454928	0.0988939	0.734619	1.23903	0.946261	0.480694	0.182231
sp|P61247|RS3A_HUMAN	40S ribosomal protein S3a OS=Homo sapiens GN=RPS3A PE=1 SV=2	0.699062	0.603964	0.443104	0.159785	0.122314	0.385564	1.09504	0.69112	1.74002	1.21083	0.421605
sp|Q9Y2V2|CHSP1_HUMAN	Calcium-regulated heat stable protein 1 OS=Homo sapiens GN=CARHSP1 PE=1 SV=2	0.674504	0.619499	0.166209	0.18724	0.208698	0.465285	1.34596	0.67909	1.30154	0.999205	0.0928448
sp|P24752|THIL_HUMAN	Acetyl-CoA acetyltransferase, mitochondrial OS=Homo sapiens GN=ACAT1 PE=1 SV=1	0.673752	0.619979	0.255329	0.163601	0.135723	0.499553	0.90811	0.875047	0.838819	1.00374	0.159483
sp|O75914|PAK3_HUMAN	Serine/threonine-protein kinase PAK 3 OS=Homo sapiens GN=PAK3 PE=1 SV=2	0.671415	0.621472	0.275455	0.381384	0.484163	0.079095	0.830157	0.910918	0.995169	0.643173	0.118356
sp|P60891|PRPS1_HUMAN	Ribose-phosphate pyrophosphokinase 1 OS=Homo sapiens GN=PRPS1 PE=1 SV=2	0.667651	0.62388	0.456325	0.356501	0.198967	0.104358	1.04458	1.14718	0.788439	0.692481	0.221455
sp|O15372|EIF3H_HUMAN	Eukaryotic translation initiation factor 3 subunit H OS=Homo sapiens GN=EIF3H PE=1 SV=1	0.661721	0.627687	0.35558	0.407596	0.221405	0.100067	1.25737	1.28875	0.632616	0.498026	0.319944
sp|P24539|AT5F1_HUMAN	ATP synthase subunit b, mitochondrial OS=Homo sapiens GN=ATP5F1 PE=1 SV=2	0.660624	0.628393	0.206315	0.277558	0.402149	0.116581	0.709928	0.74663	0.998534	1.60537	0.213499
sp|P50995|ANX11_HUMAN	Annexin A11 OS=Homo sapiens GN=ANXA11 PE=1 SV=1	0.658974	0.629455	0.121412	0.469214	0.263202	0.229542	1.46799	0.926605	1.20651	1.20722	0.253195
sp|Q5SSJ5|HP1B3_HUMAN	Heterochromatin protein 1-binding protein 3 OS=Homo sapiens GN=HP1BP3 PE=1 SV=1	0.658416	0.629815	0.301741	0.342311	0.128533	0.189251	0.743174	1.18588	0.761226	0.636032	0.240899
sp|O15145|ARPC3_HUMAN	Actin-related protein 2/3 complex subunit 3 OS=Homo sapiens GN=ARPC3 PE=1 SV=3	0.654648	0.632246	0.279284	0.445809	0.184928	0.144112	1.16466	1.04702	1.30385	1.33425	0.210864
sp|Q9H9S4|CB39L_HUMAN	Calcium-binding protein 39-like OS=Homo sapiens GN=CAB39L PE=1 SV=3	0.65332	0.633104	0.268075	0.212488	0.197738	0.198547	0.728519	1.39133	0.732907	0.661576	0.137433
sp|P55010|IF5_HUMAN	Eukaryotic translation initiation factor 5 OS=Homo sapiens GN=EIF5 PE=1 SV=2	0.652682	0.633517	0.119487	0.4242	0.376591	0.188179	1.58199	1.12636	1.16401	1.39766	0.197291
sp|P27105|STOM_HUMAN	Erythrocyte band 7 integral membrane protein OS=Homo sapiens GN=STOM PE=1 SV=3	0.651067	0.634562	0.453114	0.15594	0.452841	0.131587	1.11259	1.96462	1.38759	1.92129	0.233401
sp|Q9BUF5|TBB6_HUMAN	Tubulin beta-6 chain OS=Homo sapiens GN=TUBB6 PE=1 SV=1	0.650377	0.635009	0.233375	0.342507	0.215589	0.159453	1.20637	0.948979	1.22919	1.28108	0.131168
sp|Q969H8|CS010_HUMAN	UPF0556 protein C19orf10 OS=Homo sapiens GN=C19orf10 PE=1 SV=1	0.644314	0.638943	0.475667	0.161534	0.216312	0.196011	1.03057	0.734172	1.25402	1.28036	0.0760385
sp|P55769|NH2L1_HUMAN	NHP2-like protein 1 OS=Homo sapiens GN=NHP2L1 PE=1 SV=3	0.632816	0.646444	0.299352	0.335351	0.196529	0.155933	1.36711	1.31451	1.74922	1.71637	0.16209
sp|Q8NBQ5|DHB11_HUMAN	Estradiol 17-beta-dehydrogenase 11 OS=Homo sapiens GN=HSD17B11 PE=1 SV=3	0.632501	0.64665	0.282147	0.281347	0.261426	0.141888	1.24781	1.27093	1.3528	1.4884	0.151916
sp|Q06830|PRDX1_HUMAN	Peroxiredoxin-1 OS=Homo sapiens GN=PRDX1 PE=1 SV=1	0.63055	0.647928	0.111692	0.399383	0.173564	0.439799	0.745931	1.11271	0.773876	0.966222	0.297806
sp|O00148|DX39A_HUMAN	ATP-dependent RNA helicase DDX39A OS=Homo sapiens GN=DDX39A PE=1 SV=2	0.628854	0.649041	0.413395	0.482395	0.214287	0.107006	0.953545	1.06129	1.1972	0.725978	0.18867
sp|Q9H0Q0|FA49A_HUMAN	Protein FAM49A OS=Homo sapiens GN=FAM49A PE=1 SV=1	0.620908	0.654266	0.129845	0.353564	0.192428	0.296313	0.788106	0.845833	0.651382	1.28314	0.156009
sp|Q9BVC6|TM109_HUMAN	Transmembrane protein 109 OS=Homo sapiens GN=TMEM109 PE=1 SV=1	0.620537	0.65451	0.149478	0.381731	0.30718	0.190291	1.34833	1.08702	1.16347	1.27921	0.0566589
sp|P18621|RL17_HUMAN	60S ribosomal protein L17 OS=Homo sapiens GN=RPL17 PE=1 SV=3	0.620282	0.654678	0.282118	0.195575	0.179752	0.290983	1.13663	0.855142	1.23698	0.883006	0.174817
sp|P29144|TPP2_HUMAN	Tripeptidyl-peptidase 2 OS=Homo sapiens GN=TPP2 PE=1 SV=4	0.616865	0.656933	0.473327	0.434836	0.14718	0.139017	0.958187	0.910944	0.711954	0.678991	0.214303
sp|P62136|PP1A_HUMAN	Serine/threonine-protein phosphatase PP1-alpha catalytic subunit OS=Homo sapiens GN=PPP1CA PE=1 SV=1	0.61451	0.658489	0.259333	0.200767	0.338285	0.160492	1.06245	1.58963	0.82119	0.524597	0.249012
sp|Q09028|RBBP4_HUMAN	Histone-binding protein RBBP4 OS=Homo sapiens GN=RBBP4 PE=1 SV=3	0.609218	0.661994	0.361064	0.231001	0.378306	0.117575	1.11554	1.25006	0.932929	0.722371	0.18457
sp|P47813|IF1AX_HUMAN	Eukaryotic translation initiation factor 1A, X-chromosomal OS=Homo sapiens GN=EIF1AX PE=1 SV=2	0.605729	0.66431	0.316809	0.308251	0.162727	0.207374	1.77975	1.81865	1.8577	1.623	0.190232
sp|Q13724|MOGS_HUMAN	Mannosyl-oligosaccharide glucosidase OS=Homo sapiens GN=MOGS PE=1 SV=5	0.598484	0.669133	0.268104	0.247203	0.136198	0.321855	0.808792	1.35456	0.679591	1.20859	0.170774
sp|B2RPK0|HGB1A_HUMAN	Putative high mobility group protein B1-like 1 OS=Homo sapiens GN=HMGB1P1 PE=5 SV=1	0.596716	0.670312	0.248936	0.405865	0.451798	0.103665	1.15912	1.03574	0.955768	1.32337	0.181544
sp|Q01105|SET_HUMAN	Protein SET OS=Homo sapiens GN=SET PE=1 SV=3	0.596459	0.670484	0.170503	0.166202	0.342872	0.379419	1.33419	1.32079	0.914816	1.08896	0.258847
sp|P10644|KAP0_HUMAN	cAMP-dependent protein kinase type I-alpha regulatory subunit OS=Homo sapiens GN=PRKAR1A PE=1 SV=1	0.583291	0.679304	0.279429	0.0908887	0.444029	0.438101	0.861716	0.546224	1.04798	0.94261	0.269179
sp|Q07666|KHDR1_HUMAN	KH domain-containing, RNA-binding, signal transduction-associated protein 1 OS=Homo sapiens GN=KHDRBS1 PE=1 SV=1	0.579643	0.681757	0.334671	0.144761	0.473564	0.181162	1.16683	0.677889	1.04117	0.7147	0.31546
sp|P49411|EFTU_HUMAN	Elongation factor Tu, mitochondrial OS=Homo sapiens GN=TUFM PE=1 SV=2	0.579256	0.682017	0.297911	0.287802	0.179959	0.183989	0.941633	0.938816	0.897038	0.896487	0.0812144
sp|P51665|PSD7_HUMAN	26S proteasome non-ATPase regulatory subunit 7 OS=Homo sapiens GN=PSMD7 PE=1 SV=2	0.578429	0.682574	0.428549	0.372638	0.334876	0.0937542	0.948649	0.906289	1.10182	1.33176	0.156754
sp|P61254|RL26_HUMAN	60S ribosomal protein L26 OS=Homo sapiens GN=RPL26 PE=1 SV=1	0.569329	0.688715	0.344913	0.35928	0.248977	0.125251	0.933077	0.522362	1.23673	1.62962	0.319554
sp|P62273|RS29_HUMAN	40S ribosomal protein S29 OS=Homo sapiens GN=RPS29 PE=1 SV=2	0.56318	0.692878	0.145426	0.277091	0.329318	0.274581	1.43864	0.624107	1.00691	1.04716	0.168235
sp|P25398|RS12_HUMAN	40S ribosomal protein S12 OS=Homo sapiens GN=RPS12 PE=1 SV=3	0.560477	0.694712	0.421683	0.319186	0.166994	0.192469	1.04026	1.15385	1.3485	1.2644	0.22067
sp|Q9UKY7|CDV3_HUMAN	Protein CDV3 homolog OS=Homo sapiens GN=CDV3 PE=1 SV=1	0.557251	0.696903	0.39146	0.0952479	0.421136	0.334156	1.15	0.746731	1.09874	0.82681	0.242078
sp|P47914|RL29_HUMAN	60S ribosomal protein L29 OS=Homo sapiens GN=RPL29 PE=1 SV=2	0.554768	0.698591	0.321954	0.22029	0.257397	0.199475	1.14677	1.29388	1.23578	0.747177	0.147895
sp|O75390|CISY_HUMAN	Citrate synthase, mitochondrial OS=Homo sapiens GN=CS PE=1 SV=2	0.539508	0.709002	0.310426	0.137297	0.253399	0.426894	1.10246	1.21589	0.886039	0.970923	0.151769
sp|Q9Y262|EIF3L_HUMAN	Eukaryotic translation initiation factor 3 subunit L OS=Homo sapiens GN=EIF3L PE=1 SV=1	0.532174	0.714026	0.298646	0.186642	0.434576	0.177888	0.896443	1.23731	0.980912	0.77641	0.152675
sp|O95379|TFIP8_HUMAN	Tumor necrosis factor alpha-induced protein 8 OS=Homo sapiens GN=TNFAIP8 PE=1 SV=1	0.530108	0.715444	0.375213	0.225884	0.130651	0.460022	1.07805	1.17388	0.780691	0.985505	0.074026
sp|P16949|STMN1_HUMAN	Stathmin OS=Homo sapiens GN=STMN1 PE=1 SV=3	0.52059	0.721986	0.50147	0.167025	0.16437	0.372156	1.00354	0.860708	0.843477	0.944212	0.176217
sp|Q9NTK5|OLA1_HUMAN	Obg-like ATPase 1 OS=Homo sapiens GN=OLA1 PE=1 SV=2	0.519842	0.722501	0.227988	0.481871	0.387521	0.124358	0.835545	0.978104	0.939844	1.26305	0.119048
sp|Q9Y3B4|PM14_HUMAN	Pre-mRNA branch site protein p14 OS=Homo sapiens GN=SF3B14 PE=1 SV=1	0.512522	0.727546	0.205416	0.154397	0.406312	0.323844	0.846711	0.704198	1.16347	1.28911	0.186024
sp|Q9P1F3|CF115_HUMAN	Costars family protein C6orf115 OS=Homo sapiens GN=C6orf115 PE=1 SV=1	0.5096	0.729563	0.233752	0.431777	0.220795	0.212257	1.27153	1.05721	1.30154	1.28315	0.109451
sp|Q9C005|DPY30_HUMAN	Protein dpy-30 homolog OS=Homo sapiens GN=DPY30 PE=1 SV=1	0.50922	0.729826	0.429865	0.19811	0.276178	0.203296	0.980171	1.15325	1.10763	1.14473	0.0583626
sp|Q15435|PP1R7_HUMAN	Protein phosphatase 1 regulatory subunit 7 OS=Homo sapiens GN=PPP1R7 PE=1 SV=1	0.497217	0.738126	0.188375	0.185117	0.461983	0.350916	1.31986	1.32129	0.98722	1.11466	0.112503
sp|P30049|ATPD_HUMAN	ATP synthase subunit delta, mitochondrial OS=Homo sapiens GN=ATP5D PE=1 SV=2	0.489801	0.743266	0.240039	0.463106	0.22594	0.21019	1.25097	1.07213	1.27647	1.27902	0.0885317
sp|P61224|RAP1B_HUMAN	Ras-related protein Rap-1b OS=Homo sapiens GN=RAP1B PE=1 SV=1	0.487681	0.744737	0.256799	0.47681	0.211095	0.199497	0.85178	1.0107	1.20776	1.19737	0.124671
sp|P63220|RS21_HUMAN	40S ribosomal protein S21 OS=Homo sapiens GN=RPS21 PE=1 SV=1	0.483482	0.747651	0.177253	0.268868	0.317293	0.299631	1.31414	0.800295	1.1285	1.14579	0.170074
sp|P98179|RBM3_HUMAN	Putative RNA-binding protein 3 OS=Homo sapiens GN=RBM3 PE=1 SV=1	0.466435	0.759502	0.498985	0.487895	0.444091	0.100961	1.02183	1.06705	1.07268	0.628501	0.180138
sp|Q9GZS3|WDR61_HUMAN	WD repeat-containing protein 61 OS=Homo sapiens GN=WDR61 PE=1 SV=1	0.461634	0.762844	0.439217	0.110804	0.358698	0.44876	1.08228	0.760115	1.19312	0.947819	0.140932
sp|O43169|CYB5B_HUMAN	Cytochrome b5 type B OS=Homo sapiens GN=CYB5B PE=1 SV=2	0.459884	0.764062	0.224758	0.478709	0.312149	0.182514	1.40953	0.97966	1.30333	1.48201	0.252128
sp|O00629|IMA4_HUMAN	Importin subunit alpha-4 OS=Homo sapiens GN=KPNA4 PE=1 SV=1	0.459761	0.764148	0.322408	0.190112	0.410847	0.224112	1.11177	1.22501	1.06571	1.18332	0.0826236
sp|Q9UHV9|PFD2_HUMAN	Prefoldin subunit 2 OS=Homo sapiens GN=PFDN2 PE=1 SV=1	0.459333	0.764446	0.474352	0.479719	0.156271	0.198648	1.04382	0.988029	0.681006	0.729721	0.195286
sp|P13473|LAMP2_HUMAN	Lysosome-associated membrane glycoprotein 2 OS=Homo sapiens GN=LAMP2 PE=1 SV=2	0.451001	0.77025	0.369246	0.132638	0.390041	0.338492	0.97242	1.46958	0.986881	1.15709	0.238393
tr|Q5VU59|Q5VU59_HUMAN	Tropomyosin 3 OS=Homo sapiens GN=TPM3 PE=2 SV=1	0.450729	0.770439	0.199052	0.318241	0.262676	0.304156	1.82195	1.05456	1.54206	1.35126	0.270056
sp|P14324|FPPS_HUMAN	Farnesyl pyrophosphate synthase OS=Homo sapiens GN=FDPS PE=1 SV=4	0.44968	0.771169	0.390271	0.276932	0.474721	0.136458	0.946457	1.19163	0.99115	1.29767	0.153274
sp|Q06323|PSME1_HUMAN	Proteasome activator complex subunit 1 OS=Homo sapiens GN=PSME1 PE=1 SV=1	0.445673	0.773961	0.444594	0.445463	0.354463	0.117095	0.981701	1.02573	1.06051	1.1906	0.13363
sp|P11310|ACADM_HUMAN	Medium-chain specific acyl-CoA dehydrogenase, mitochondrial OS=Homo sapiens GN=ACADM PE=1 SV=1	0.444853	0.774533	0.239072	0.44261	0.262893	0.209486	1.30927	1.01016	1.35195	1.32794	0.23734
sp|O43765|SGTA_HUMAN	Small glutamine-rich tetratricopeptide repeat-containing protein alpha OS=Homo sapiens GN=SGTA PE=1 SV=1	0.443471	0.775496	0.140648	0.280402	0.423771	0.500201	1.33819	1.18283	1.06832	0.993765	0.0858796
sp|P04899|GNAI2_HUMAN	Guanine nucleotide-binding protein G(i) subunit alpha-2 OS=Homo sapiens GN=GNAI2 PE=1 SV=3	0.437584	0.779597	0.324246	0.170234	0.496271	0.260291	1.14258	1.50474	0.919772	1.19066	0.261085
sp|Q9NS69|TOM22_HUMAN	Mitochondrial import receptor subunit TOM22 homolog OS=Homo sapiens GN=TOMM22 PE=1 SV=3	0.437291	0.779801	0.462621	0.451796	0.220806	0.167877	1.02961	1.02611	1.23562	1.28125	0.139396
sp|O95202|LETM1_HUMAN	LETM1 and EF-hand domain-containing protein 1, mitochondrial OS=Homo sapiens GN=LETM1 PE=1 SV=1	0.43689	0.780081	0.246963	0.423695	0.309917	0.17695	1.4517	1.2291	0.678778	1.78837	0.293847
sp|O60361|NDK8_HUMAN	Putative nucleoside diphosphate kinase OS=Homo sapiens GN=NME2P1 PE=5 SV=1	0.435117	0.781315	0.441161	0.164761	0.440878	0.213587	0.980364	0.86915	1.02239	1.1089	0.0727955
sp|P55809|SCOT1_HUMAN	Succinyl-CoA:3-ketoacid-coenzyme A transferase 1, mitochondrial OS=Homo sapiens GN=OXCT1 PE=1 SV=1	0.429942	0.78492	0.318414	0.47116	0.419163	0.128145	1.16938	1.03405	0.949546	1.48741	0.183734
sp|Q00796|DHSO_HUMAN	Sorbitol dehydrogenase OS=Homo sapiens GN=SORD PE=1 SV=4	0.429652	0.785122	0.126209	0.488924	0.280413	0.400134	0.622989	1.05816	0.853443	0.889244	0.193706
sp|Q9UBQ5|EIF3K_HUMAN	Eukaryotic translation initiation factor 3 subunit K OS=Homo sapiens GN=EIF3K PE=1 SV=1	0.427354	0.786722	0.463395	0.183283	0.260919	0.285687	1.03457	1.2813	0.849036	0.867372	0.110559
sp|P63173|RL38_HUMAN	60S ribosomal protein L38 OS=Homo sapiens GN=RPL38 PE=1 SV=2	0.426734	0.787154	0.291654	0.162404	0.344525	0.360324	1.26194	0.731683	1.24436	0.762284	0.234715
sp|O60216|RAD21_HUMAN	Double-strand-break repair protein rad21 homolog OS=Homo sapiens GN=RAD21 PE=1 SV=2	0.419424	0.792242	0.292379	0.286922	0.180186	0.322291	0.696838	1.00804	0.692627	0.74149	0.159138
sp|P59998|ARPC4_HUMAN	Actin-related protein 2/3 complex subunit 4 OS=Homo sapiens GN=ARPC4 PE=1 SV=3	0.417151	0.793823	0.357805	0.237259	0.269277	0.230324	0.865348	1.46936	0.728506	0.683187	0.360158
sp|P78371|TCPB_HUMAN	T-complex protein 1 subunit beta OS=Homo sapiens GN=CCT2 PE=1 SV=4	0.415879	0.794708	0.467959	0.12188	0.420124	0.351296	1.00589	0.860237	0.970396	1.04167	0.162961
sp|Q03252|LMNB2_HUMAN	Lamin-B2 OS=Homo sapiens GN=LMNB2 PE=1 SV=3	0.414123	0.795929	0.479662	0.488466	0.135444	0.33067	0.991281	1.14913	1.57161	1.16808	0.328482
sp|P22234|PUR6_HUMAN	Multifunctional protein ADE2 OS=Homo sapiens GN=PAICS PE=1 SV=3	0.41382	0.79614	0.372302	0.261347	0.175754	0.451419	1.05325	1.12638	1.194	1.01423	0.160442
sp|Q9Y4Z0|LSM4_HUMAN	U6 snRNA-associated Sm-like protein LSm4 OS=Homo sapiens GN=LSM4 PE=1 SV=1	0.412635	0.796963	0.47619	0.210477	0.179298	0.43267	0.90128	1.44213	0.684871	0.803285	0.240316
sp|Q9NTJ5|SAC1_HUMAN	Phosphatidylinositide phosphatase SAC1 OS=Homo sapiens GN=SACM1L PE=1 SV=2	0.404736	0.802451	0.42765	0.481955	0.381312	0.125631	1.04339	1.02425	1.13545	1.42756	0.233651
sp|Q8WU90|ZC3HF_HUMAN	Zinc finger CCCH domain-containing protein 15 OS=Homo sapiens GN=ZC3H15 PE=1 SV=1	0.40256	0.803961	0.284052	0.386305	0.145186	0.407698	0.851248	0.918858	0.738384	0.930758	0.0991984
sp|O15260|SURF4_HUMAN	Surfeit locus protein 4 OS=Homo sapiens GN=SURF4 PE=1 SV=3	0.401304	0.804832	0.506431	0.188176	0.388946	0.215061	0.999682	0.830102	1.11676	1.257	0.214944
sp|P24666|PPAC_HUMAN	Low molecular weight phosphotyrosine protein phosphatase OS=Homo sapiens GN=ACP1 PE=1 SV=3	0.399011	0.806422	0.462485	0.419467	0.162076	0.270291	0.928391	0.934369	1.3855	1.18446	0.179754
sp|Q15843|NEDD8_HUMAN	NEDD8 OS=Homo sapiens GN=NEDD8 PE=1 SV=1	0.394226	0.809738	0.340242	0.147203	0.444886	0.407709	1.1145	1.28229	1.05289	0.948941	0.139888
sp|P00492|HPRT_HUMAN	Hypoxanthine-guanine phosphoribosyltransferase OS=Homo sapiens GN=HPRT1 PE=1 SV=2	0.391151	0.811867	0.399139	0.294453	0.169721	0.329989	1.07922	1.1557	0.765126	1.10534	0.201767
sp|P62191|PRS4_HUMAN	26S protease regulatory subunit 4 OS=Homo sapiens GN=PSMC1 PE=1 SV=1	0.391066	0.811926	0.294507	0.205042	0.296643	0.343598	1.58036	0.758703	1.5663	1.27392	0.257661
sp|P54886|P5CS_HUMAN	Delta-1-pyrroline-5-carboxylate synthase OS=Homo sapiens GN=ALDH18A1 PE=1 SV=2	0.390769	0.812132	0.464826	0.132591	0.418698	0.425765	0.979591	1.36079	1.06037	0.946262	0.0814174
sp|P54819|KAD2_HUMAN	Adenylate kinase 2, mitochondrial OS=Homo sapiens GN=AK2 PE=1 SV=2	0.385654	0.815668	0.417814	0.485285	0.173347	0.228123	0.977179	0.993996	0.896026	1.08148	0.0828405
sp|P83731|RL24_HUMAN	60S ribosomal protein L24 OS=Homo sapiens GN=RPL24 PE=1 SV=1	0.384188	0.81668	0.428665	0.151815	0.432521	0.289117	1.24618	0.732647	1.0966	1.34459	0.211003
sp|O43583|DENR_HUMAN	Density-regulated protein OS=Homo sapiens GN=DENR PE=1 SV=2	0.371089	0.825705	0.33117	0.332872	0.197076	0.328302	1.25661	1.01285	1.62492	1.33662	0.185914
sp|Q3ZCQ8|TIM50_HUMAN	Mitochondrial import inner membrane translocase subunit TIM50 OS=Homo sapiens GN=TIMM50 PE=1 SV=2	0.371031	0.825746	0.349913	0.142498	0.467376	0.369028	0.817686	0.672256	1.01337	0.818678	0.193637
sp|Q13126|MTAP_HUMAN	S-methyl-5'-thioadenosine phosphorylase OS=Homo sapiens GN=MTAP PE=1 SV=2	0.370706	0.825969	0.121373	0.478812	0.477975	0.378302	0.62846	1.07571	0.992701	0.922441	0.198041
sp|P61803|DAD1_HUMAN	Dolichyl-diphosphooligosaccharide--protein glycosyltransferase subunit DAD1 OS=Homo sapiens GN=DAD1 PE=1 SV=3	0.368457	0.827513	0.235706	0.394593	0.220899	0.385106	1.25097	1.09125	1.27647	0.937869	0.0802979
sp|P48960|CD97_HUMAN	CD97 antigen OS=Homo sapiens GN=CD97 PE=1 SV=4	0.368348	0.827588	0.211296	0.243442	0.486921	0.318067	1.42128	0.733257	1.00036	1.21447	0.144453
sp|P30044|PRDX5_HUMAN	Peroxiredoxin-5, mitochondrial OS=Homo sapiens GN=PRDX5 PE=1 SV=4	0.366271	0.829014	0.40236	0.206623	0.24657	0.323475	1.09328	0.823388	0.856971	0.90498	0.192419
sp|Q13838|DX39B_HUMAN	Spliceosome RNA helicase DDX39B OS=Homo sapiens GN=DDX39B PE=1 SV=1	0.363583	0.830856	0.260068	0.242591	0.279628	0.355084	1.56946	1.04302	0.641228	1.18641	0.378177
sp|P62314|SMD1_HUMAN	Small nuclear ribonucleoprotein Sm D1 OS=Homo sapiens GN=SNRPD1 PE=1 SV=1	0.359133	0.833902	0.50705	0.165182	0.37406	0.318581	0.992383	1.37145	0.906399	0.856934	0.128478
sp|P13489|RINI_HUMAN	Ribonuclease inhibitor OS=Homo sapiens GN=RNH1 PE=1 SV=2	0.351245	0.839284	0.502805	0.313078	0.213388	0.268324	1.01416	0.863275	1.28764	1.19779	0.0891447
sp|Q14919|NC2A_HUMAN	Dr1-associated corepressor OS=Homo sapiens GN=DRAP1 PE=1 SV=3	0.346304	0.842644	0.329865	0.193003	0.399267	0.333363	1.19076	1.34492	1.12733	1.18594	0.115741
sp|P46778|RL21_HUMAN	60S ribosomal protein L21 OS=Homo sapiens GN=RPL21 PE=1 SV=2	0.342956	0.844915	0.466451	0.150543	0.48064	0.323106	0.835072	0.599747	0.90804	0.63312	0.214279
sp|P61769|B2MG_HUMAN	Beta-2-microglobulin OS=Homo sapiens GN=B2M PE=1 SV=1	0.339744	0.847089	0.256896	0.286286	0.43937	0.244816	1.30808	0.848187	1.04195	1.24316	0.253729
sp|Q9NR45|SIAS_HUMAN	Sialic acid synthase OS=Homo sapiens GN=NANS PE=1 SV=2	0.333978	0.850982	0.40028	0.254602	0.224866	0.352626	0.854308	0.922726	1.47502	1.23805	0.253124
sp|P62913|RL11_HUMAN	60S ribosomal protein L11 OS=Homo sapiens GN=RPL11 PE=1 SV=2	0.333554	0.851268	0.437979	0.171749	0.323698	0.412022	1.04579	1.34819	0.871216	0.934385	0.134809
sp|Q15019|SEPT2_HUMAN	Septin-2 OS=Homo sapiens GN=SEPT2 PE=1 SV=1	0.332888	0.851716	0.448907	0.33565	0.399442	0.160961	1.03097	0.924608	0.958674	0.833783	0.131311
sp|Q8IYB3|SRRM1_HUMAN	Serine/arginine repetitive matrix protein 1 OS=Homo sapiens GN=SRRM1 PE=1 SV=2	0.326448	0.856042	0.269923	0.286717	0.277841	0.385587	1.38845	1.92237	1.99571	1.38579	0.216212
sp|Q13200|PSMD2_HUMAN	26S proteasome non-ATPase regulatory subunit 2 OS=Homo sapiens GN=PSMD2 PE=1 SV=3	0.32369	0.857888	0.434439	0.341796	0.155372	0.412637	0.98709	0.913957	0.782301	1.05533	0.259004
sp|Q01469|FABP5_HUMAN	Fatty acid-binding protein, epidermal OS=Homo sapiens GN=FABP5 PE=1 SV=3	0.321409	0.859412	0.197534	0.35608	0.485496	0.266793	0.791492	1.26963	1.21411	1.51807	0.253027
sp|Q9UQ80|PA2G4_HUMAN	Proliferation-associated protein 2G4 OS=Homo sapiens GN=PA2G4 PE=1 SV=3	0.317234	0.862195	0.294391	0.234471	0.471519	0.275654	1.08878	0.907792	0.997286	0.919596	0.127286
sp|P61088|UBE2N_HUMAN	Ubiquitin-conjugating enzyme E2 N OS=Homo sapiens GN=UBE2N PE=1 SV=1	0.316073	0.862967	0.382689	0.178859	0.380599	0.35438	1.05565	0.858778	1.05561	1.06028	0.144886
sp|Q9UMS4|PRP19_HUMAN	Pre-mRNA-processing factor 19 OS=Homo sapiens GN=PRPF19 PE=1 SV=1	0.315283	0.863492	0.241064	0.486922	0.423326	0.219676	1.43719	1.06339	1.08357	0.681975	0.174042
sp|Q9UNM6|PSD13_HUMAN	26S proteasome non-ATPase regulatory subunit 13 OS=Homo sapiens GN=PSMD13 PE=1 SV=2	0.313785	0.864486	0.373201	0.186324	0.382014	0.384637	1.05465	1.16497	1.05484	0.952906	0.114253
sp|P57088|TMM33_HUMAN	Transmembrane protein 33 OS=Homo sapiens GN=TMEM33 PE=1 SV=2	0.309618	0.867246	0.412311	0.358279	0.189194	0.366514	1.11615	0.754777	1.60832	1.04883	0.162811
sp|Q9NTM9|CUTC_HUMAN	Copper homeostasis protein cutC homolog OS=Homo sapiens GN=CUTC PE=1 SV=1	0.307428	0.868691	0.308501	0.212395	0.380331	0.393318	1.15789	1.26067	1.10159	0.928688	0.0550152
sp|P27695|APEX1_HUMAN	DNA-(apurinic or apyrimidinic site) lyase OS=Homo sapiens GN=APEX1 PE=1 SV=2	0.307225	0.868825	0.475687	0.227596	0.259907	0.390603	0.983864	1.12617	1.1057	1.04231	0.120776
sp|O60234|GMFG_HUMAN	Glia maturation factor gamma OS=Homo sapiens GN=GMFG PE=1 SV=1	0.304506	0.870616	0.369584	0.382713	0.23063	0.283039	1.13557	0.928379	1.25983	0.844012	0.15154
sp|P17947|SPI1_HUMAN	Transcription factor PU.1 OS=Homo sapiens GN=SPI1 PE=1 SV=2	0.300471	0.873265	0.306228	0.361141	0.287314	0.269911	1.16928	0.927408	1.19312	1.1955	0.0756519
sp|P16930|FAAA_HUMAN	Fumarylacetoacetase OS=Homo sapiens GN=FAH PE=1 SV=2	0.298321	0.874673	0.193404	0.488999	0.248316	0.479128	0.82647	1.01245	0.829251	1.01545	0.230125
sp|O15347|HMGB3_HUMAN	High mobility group protein B3 OS=Homo sapiens GN=HMGB3 PE=1 SV=4	0.290526	0.879748	0.425716	0.186314	0.436746	0.315654	1.23885	0.755746	1.11694	1.23551	0.28726
sp|P46783|RS10_HUMAN	40S ribosomal protein S10 OS=Homo sapiens GN=RPS10 PE=1 SV=1	0.288866	0.880824	0.269555	0.23841	0.385868	0.366436	1.14808	0.886696	0.93527	0.920302	0.188762
sp|Q15631|TSN_HUMAN	Translin OS=Homo sapiens GN=TSN PE=1 SV=1	0.284161	0.88386	0.261306	0.365819	0.232469	0.389508	0.852889	1.12217	0.807592	1.07154	0.205369
sp|P46977|STT3A_HUMAN	Dolichyl-diphosphooligosaccharide--protein glycosyltransferase subunit STT3A OS=Homo sapiens GN=STT3A PE=1 SV=2	0.278822	0.887286	0.287273	0.231796	0.473698	0.336827	0.833322	1.30928	1.03147	1.12816	0.216676
sp|Q7L5N7|PCAT2_HUMAN	Lysophosphatidylcholine acyltransferase 2 OS=Homo sapiens GN=LPCAT2 PE=1 SV=1	0.276731	0.888622	0.323946	0.35073	0.22468	0.36695	1.21801	1.16732	0.705044	1.00753	0.289692
sp|Q9NQW7|XPP1_HUMAN	Xaa-Pro aminopeptidase 1 OS=Homo sapiens GN=XPNPEP1 PE=1 SV=3	0.271184	0.892148	0.296132	0.351852	0.495919	0.21514	0.723154	1.11537	0.971559	1.53217	0.218806
sp|P06748|NPM_HUMAN	Nucleophosmin OS=Homo sapiens GN=NPM1 PE=1 SV=2	0.267609	0.894406	0.267389	0.318288	0.396198	0.273475	0.933624	1.06546	0.974708	0.937223	0.125065
sp|P30085|KCY_HUMAN	UMP-CMP kinase OS=Homo sapiens GN=CMPK1 PE=1 SV=3	0.265438	0.895772	0.313607	0.48841	0.223151	0.381654	1.11029	1.01052	1.15353	1.06094	0.142417
sp|P48735|IDHP_HUMAN	Isocitrate dehydrogenase [NADP], mitochondrial OS=Homo sapiens GN=IDH2 PE=1 SV=2	0.265311	0.895852	0.45207	0.354584	0.192851	0.47543	1.02216	0.962535	1.15366	1.00633	0.183288
sp|Q5T9A4|ATD3B_HUMAN	ATPase family AAA domain-containing protein 3B OS=Homo sapiens GN=ATAD3B PE=1 SV=1	0.262767	0.897447	0.438656	0.264995	0.295238	0.284369	0.963655	1.02521	0.759642	0.731432	0.270909
sp|P61981|1433G_HUMAN	14-3-3 protein gamma OS=Homo sapiens GN=YWHAG PE=1 SV=2	0.256384	0.901423	0.23205	0.32348	0.390961	0.400637	1.09658	1.06445	1.03976	0.967341	0.0780614
sp|P62318|SMD3_HUMAN	Small nuclear ribonucleoprotein Sm D3 OS=Homo sapiens GN=SNRPD3 PE=1 SV=1	0.256283	0.901486	0.276634	0.457558	0.257262	0.374246	1.25932	0.987931	1.25883	1.15589	0.166689
sp|P82979|SARNP_HUMAN	SAP domain-containing ribonucleoprotein OS=Homo sapiens GN=SARNP PE=1 SV=3	0.245321	0.908221	0.347215	0.242516	0.475517	0.300469	1.25116	0.924391	1.00349	0.713013	0.2985
sp|P39687|AN32A_HUMAN	Acidic leucine-rich nuclear phosphoprotein 32 family member A OS=Homo sapiens GN=ANP32A PE=1 SV=1	0.241659	0.910444	0.243211	0.408241	0.373688	0.32314	1.22291	0.991707	1.12535	1.0908	0.337502
sp|P26368|U2AF2_HUMAN	Splicing factor U2AF 65 kDa subunit OS=Homo sapiens GN=U2AF2 PE=1 SV=4	0.230257	0.91727	0.365213	0.457297	0.278419	0.253743	0.908008	1.07061	0.856409	0.813542	0.21854
sp|P17812|PYRG1_HUMAN	CTP synthase 1 OS=Homo sapiens GN=CTPS PE=1 SV=2	0.230023	0.917409	0.227515	0.389205	0.339421	0.388883	0.874895	1.08073	1.11626	1.06573	0.197513
sp|O15067|PUR4_HUMAN	Phosphoribosylformylglycinamidine synthase OS=Homo sapiens GN=PFAS PE=1 SV=4	0.223185	0.921429	0.213172	0.487717	0.365382	0.407709	1.85215	1.5105	1.10734	0.873166	0.216307
sp|Q9BYZ2|LDH6B_HUMAN	L-lactate dehydrogenase A-like 6B OS=Homo sapiens GN=LDHAL6B PE=1 SV=3	0.221165	0.922605	0.314159	0.495996	0.448585	0.219553	0.891168	1.01751	1.05426	0.819205	0.150535
sp|O43681|ASNA_HUMAN	ATPase ASNA1 OS=Homo sapiens GN=ASNA1 PE=1 SV=2	0.219153	0.923772	0.299845	0.329298	0.306756	0.339877	0.85358	0.960866	0.863527	0.661286	0.210557
sp|Q99598|TSNAX_HUMAN	Translin-associated protein X OS=Homo sapiens GN=TSNAX PE=1 SV=1	0.204789	0.93195	0.226441	0.436324	0.442634	0.361441	1.22319	1.04771	0.973418	1.1142	0.146772
sp|Q6DD88|ATLA3_HUMAN	Atlastin-3 OS=Homo sapiens GN=ATL3 PE=1 SV=1	0.198486	0.935449	0.253172	0.361366	0.424845	0.369709	1.84013	1.01876	1.82176	1.36347	0.204287
sp|P18754|RCC1_HUMAN	Regulator of chromosome condensation OS=Homo sapiens GN=RCC1 PE=1 SV=1	0.198005	0.935713	0.233588	0.35725	0.450083	0.477352	1.18281	1.08027	1.03402	1.0097	0.163003
sp|P33316|DUT_HUMAN	Deoxyuridine 5'-triphosphate nucleotidohydrolase, mitochondrial OS=Homo sapiens GN=DUT PE=1 SV=3	0.196722	0.936418	0.352679	0.451207	0.273554	0.315263	1.08101	1.02167	0.906253	0.905342	0.175904
sp|P42785|PCP_HUMAN	Lysosomal Pro-X carboxypeptidase OS=Homo sapiens GN=PRCP PE=1 SV=1	0.194362	0.937707	0.472544	0.251572	0.289153	0.501788	0.98985	0.82648	0.840338	0.963391	0.168599
sp|Q15427|SF3B4_HUMAN	Splicing factor 3B subunit 4 OS=Homo sapiens GN=SF3B4 PE=1 SV=1	0.193582	0.938131	0.385774	0.411001	0.376271	0.247285	1.12656	0.95843	1.16177	1.23796	0.196579
sp|P00813|ADA_HUMAN	Adenosine deaminase OS=Homo sapiens GN=ADA PE=1 SV=3	0.193398	0.938231	0.485571	0.261805	0.33814	0.388927	0.99608	1.28542	1.16498	1.09949	0.113731
sp|P05023|AT1A1_HUMAN	Sodium/potassium-transporting ATPase subunit alpha-1 OS=Homo sapiens GN=ATP1A1 PE=1 SV=1	0.192305	0.938824	0.422611	0.310365	0.387221	0.270156	1.05064	0.936889	0.941374	1.16058	0.204461
sp|P83916|CBX1_HUMAN	Chromobox protein homolog 1 OS=Homo sapiens GN=CBX1 PE=1 SV=1	0.188938	0.940638	0.221634	0.416034	0.414525	0.471508	1.27556	0.895349	0.896892	0.920936	0.12588
sp|Q07960|RHG01_HUMAN	Rho GTPase-activating protein 1 OS=Homo sapiens GN=ARHGAP1 PE=1 SV=1	0.185966	0.942225	0.388414	0.251824	0.379267	0.400067	0.913456	1.40293	0.990334	0.89693	0.316076
sp|P62269|RS18_HUMAN	40S ribosomal protein S18 OS=Homo sapiens GN=RPS18 PE=1 SV=3	0.171271	0.949859	0.449265	0.473312	0.500279	0.218804	1.03528	1.02282	1.00169	1.16567	0.152983
sp|P09493|TPM1_HUMAN	Tropomyosin alpha-1 chain OS=Homo sapiens GN=TPM1 PE=1 SV=2	0.164243	0.95338	0.254565	0.403742	0.392221	0.466793	1.49308	1.23404	1.23454	1.03489	0.167092
sp|P52815|RM12_HUMAN	39S ribosomal protein L12, mitochondrial OS=Homo sapiens GN=MRPL12 PE=1 SV=2	0.161487	0.954736	0.350116	0.262021	0.406126	0.483296	1.19555	0.958822	0.925537	0.990472	0.343149
sp|Q16851|UGPA_HUMAN	UTP--glucose-1-phosphate uridylyltransferase OS=Homo sapiens GN=UGP2 PE=1 SV=5	0.155709	0.957533	0.485493	0.327942	0.265713	0.474168	0.968339	1.34288	0.906921	0.969979	0.118799
sp|O75083|WDR1_HUMAN	WD repeat-containing protein 1 OS=Homo sapiens GN=WDR1 PE=1 SV=4	0.153868	0.958411	0.307689	0.382133	0.348089	0.381966	1.37216	0.887226	0.778685	1.23686	0.204063
sp|P35606|COPB2_HUMAN	Coatomer subunit beta' OS=Homo sapiens GN=COPB2 PE=1 SV=2	0.147049	0.961605	0.3203	0.36464	0.363285	0.378883	0.842143	1.13611	1.17361	1.08331	0.201951
sp|Q86UE4|LYRIC_HUMAN	Protein LYRIC OS=Homo sapiens GN=MTDH PE=1 SV=2	0.144166	0.962928	0.338723	0.352984	0.317624	0.398849	0.740623	0.932833	0.766585	1.0437	0.39649
sp|P26641|EF1G_HUMAN	Elongation factor 1-gamma OS=Homo sapiens GN=EEF1G PE=1 SV=3	0.140046	0.964788	0.373849	0.335697	0.480124	0.320726	1.035	1.04318	0.994463	1.04524	0.0826589
sp|P48643|TCPE_HUMAN	T-complex protein 1 subunit epsilon OS=Homo sapiens GN=CCT5 PE=1 SV=1	0.134087	0.967414	0.418153	0.387568	0.402831	0.282648	1.02479	0.97674	0.976646	0.937636	0.103444
sp|P49773|HINT1_HUMAN	Histidine triad nucleotide-binding protein 1 OS=Homo sapiens GN=HINT1 PE=1 SV=2	0.125615	0.971014	0.368694	0.409813	0.305093	0.415911	0.863788	0.920392	1.15642	1.02708	0.258333
sp|P61960|UFM1_HUMAN	Ubiquitin-fold modifier 1 OS=Homo sapiens GN=UFM1 PE=1 SV=1	0.0915708	0.983733	0.337505	0.412591	0.484876	0.372089	1.11998	0.929878	1.00327	1.07842	0.0933685
sp|Q00325|MPCP_HUMAN	Phosphate carrier protein, mitochondrial OS=Homo sapiens GN=SLC25A3 PE=1 SV=2	0.0782327	0.987868	0.496141	0.365566	0.389329	0.375933	1.02922	1.12115	0.924195	1.08596	0.226093
sp|P12270|TPR_HUMAN	Nucleoprotein TPR OS=Homo sapiens GN=TPR PE=1 SV=3	0.0607871	0.992464	0.478549	0.362142	0.402996	0.401765	1.61303	0.743295	1.22534	1.31209	0.217848
sp|P61956|SUMO2_HUMAN	Small ubiquitin-related modifier 2 OS=Homo sapiens GN=SUMO2 PE=1 SV=2	0.0596621	0.992727	0.442215	0.388877	0.436043	0.370905	1.06971	0.911459	0.93709	0.879766	0.140697
sp|P08670|VIME_HUMAN	Vimentin OS=Homo sapiens GN=VIM PE=1 SV=4	31.6399	3.11927e-06	NA	0.204275	0	NA	0.0918565	1.14974	0.135361	0	0.071406
sp|P11678|PERE_HUMAN	Eosinophil peroxidase OS=Homo sapiens GN=EPX PE=1 SV=2	21.837	2.92653e-05	9.67118e-06	0.456576	NA	NA	0.139704	0.980312	0	0.0219565	0.206561
sp|P13727|PRG2_HUMAN	Bone marrow proteoglycan OS=Homo sapiens GN=PRG2 PE=1 SV=2	13.5427	0.000382761	6.76983e-05	0.454593	NA	NA	0.107409	1.02528	0	0	0.217578
sp|Q01581|HMCS1_HUMAN	Hydroxymethylglutaryl-CoA synthase, cytoplasmic OS=Homo sapiens GN=HMGCS1 PE=1 SV=2	7.21172	0.00292026	0.0909961	0.243068	0.000330579	NA	1.38728	0.837775	0.215909	0	0.209509
sp|P20290|BTF3_HUMAN	Transcription factor BTF3 OS=Homo sapiens GN=BTF3 PE=1 SV=1	5.44955	0.00918732	0.391692	0.234434	0.000743802	NA	1.11097	0.774451	0.236749	0.148898	0.172044
sp|P53007|TXTP_HUMAN	Tricarboxylate transport protein, mitochondrial OS=Homo sapiens GN=SLC25A1 PE=1 SV=2	5.42891	0.00932087	0.00117021	0.242413	NA	0.100112	0.203523	0.768079	0.167374	0.590612	0.134917
sp|Q9BQG0|MBB1A_HUMAN	Myb-binding protein 1A OS=Homo sapiens GN=MYBBP1A PE=1 SV=2	6.37345	0.00941781	0.0015087	0.373237	NA	NA	0.208418	0.989403	0	0	0.233071
sp|O75369|FLNB_HUMAN	Filamin-B OS=Homo sapiens GN=FLNB PE=1 SV=2	6.01011	0.0115384	0.00178917	0.486183	NA	NA	0.225742	1.05741	0.0824536	0	0.141218
sp|Q08945|SSRP1_HUMAN	FACT complex subunit SSRP1 OS=Homo sapiens GN=SSRP1 PE=1 SV=1	4.78365	0.0148272	0.138772	0.0692142	0.00268595	NA	0.66593	0.676481	0.215327	0.072886	0.277505
sp|Q6PKG0|LARP1_HUMAN	La-related protein 1 OS=Homo sapiens GN=LARP1 PE=1 SV=2	4.47653	0.0186688	0.211828	0.0845089	0.00265496	NA	0.831672	0.710611	0.416928	0.0209587	0.180843
sp|P78347|GTF2I_HUMAN	General transcription factor II-I OS=Homo sapiens GN=GTF2I PE=1 SV=2	5.13308	0.0192726	0.00346228	0.239027	NA	NA	0.224946	0.816855	0.0643385	0	0.275936
sp|P25098|ARBK1_HUMAN	Beta-adrenergic receptor kinase 1 OS=Homo sapiens GN=ADRBK1 PE=1 SV=2	4.34134	0.0207037	0.0346518	0.154097	0.00577479	NA	0.444709	0.680027	0.331191	0	0.167426
sp|P04818|TYSY_HUMAN	Thymidylate synthase OS=Homo sapiens GN=TYMS PE=1 SV=3	4.64017	0.0261134	0.009294	0.101899	NA	NA	3.82714	1.97229	0.530017	0	0.175263
sp|Q9Y6E2|BZW2_HUMAN	Basic leucine zipper and W2 domain-containing protein 2 OS=Homo sapiens GN=BZW2 PE=1 SV=1	3.87544	0.0298697	0.0221663	0.222872	0.0119112	NA	0.428732	0.694185	0.308082	0	0.225215
sp|Q14839|CHD4_HUMAN	Chromodomain-helicase-DNA-binding protein 4 OS=Homo sapiens GN=CHD4 PE=1 SV=2	4.31984	0.0320197	0.00524178	0.315033	NA	NA	0.527464	1.11332	0	0	0.144708
sp|P61221|ABCE1_HUMAN	ATP-binding cassette sub-family E member 1 OS=Homo sapiens GN=ABCE1 PE=1 SV=1	3.74797	0.0331131	0.0492263	0.372451	0.00597107	NA	0.652706	0.943755	0.428596	0.124321	0.162672
sp|Q8NCW5|AIBP_HUMAN	Apolipoprotein A-I-binding protein OS=Homo sapiens GN=APOA1BP PE=1 SV=2	3.63014	0.0364635	0.0273308	0.0739289	NA	0.0277877	0.375866	0.486487	0.0982489	0.375003	0.15154
sp|Q92616|GCN1L_HUMAN	Translational activator GCN1 OS=Homo sapiens GN=GCN1L1 PE=1 SV=6	3.5605	0.0386204	0.0323211	0.343452	0.0107128	NA	0.446951	1.26723	0.326616	0.0160152	0.345425
sp|Q86XP3|DDX42_HUMAN	ATP-dependent RNA helicase DDX42 OS=Homo sapiens GN=DDX42 PE=1 SV=1	3.50781	0.0403472	0.0975435	0.135136	0.00788223	NA	0.529132	0.624868	0.292641	0.061019	0.162281
sp|Q7Z5K2|WAPL_HUMAN	Wings apart-like protein homolog OS=Homo sapiens GN=WAPAL PE=1 SV=1	3.42822	0.0431208	0.0139265	0.0949205	0.0596901	NA	0.365492	0.417555	0.466344	0	0.165221
sp|Q13177|PAK2_HUMAN	Serine/threonine-protein kinase PAK 2 OS=Homo sapiens GN=PAK2 PE=1 SV=3	3.14515	0.0548487	0.00841393	0.128326	0.308368	NA	2.53921	1.72461	1.26642	0.0629523	0.217411
sp|O60341|KDM1A_HUMAN	Lysine-specific histone demethylase 1A OS=Homo sapiens GN=KDM1A PE=1 SV=2	3.50542	0.0551456	0.0139072	0.133283	NA	NA	0.377293	0.604731	0	0	0.130693
sp|O15355|PPM1G_HUMAN	Protein phosphatase 1G OS=Homo sapiens GN=PPM1G PE=1 SV=1	2.9096	0.0673412	0.0931141	0.0556595	0.0389256	NA	1.76902	2.12085	0.453271	0	0.201996
sp|Q9H583|HEAT1_HUMAN	HEAT repeat-containing protein 1 OS=Homo sapiens GN=HEATR1 PE=1 SV=3	2.89592	0.0681583	0.0464313	0.197297	0.0221901	NA	0.461675	0.682935	0.467918	0.0434492	0.192754
sp|Q08J23|NSUN2_HUMAN	tRNA (cytosine(34)-C(5))-methyltransferase OS=Homo sapiens GN=NSUN2 PE=1 SV=2	3.13234	0.0716769	NA	0.0761646	0.0331198	NA	0.251989	0.57372	0.369775	0.0646887	0.178279
sp|Q14444|CAPR1_HUMAN	Caprin-1 OS=Homo sapiens GN=CAPRIN1 PE=1 SV=2	2.76453	0.0765894	0.417747	0.320355	0.00647727	NA	0.871928	1.13737	0.275211	0.0471797	0.17129
sp|Q99829|CPNE1_HUMAN	Copine-1 OS=Homo sapiens GN=CPNE1 PE=1 SV=1	2.57947	0.0904872	0.418549	0.495706	0.00735537	NA	0.938795	1.05324	0.375866	0	0.173554
sp|Q9H3P2|NELFA_HUMAN	Negative elongation factor A OS=Homo sapiens GN=WHSC2 PE=1 SV=3	2.80276	0.0910414	0.0324275	0.0994107	NA	NA	0.489414	0.481191	0.218362	0	0.151837
sp|P47897|SYQ_HUMAN	Glutaminyl-tRNA synthetase OS=Homo sapiens GN=QARS PE=1 SV=1	2.56843	0.0914009	0.141809	0.408625	0.0114979	NA	0.627161	1.12981	0.306922	0.0389891	0.225374
sp|Q9BV20|MTNA_HUMAN	Methylthioribose-1-phosphate isomerase OS=Homo sapiens GN=MRI1 PE=1 SV=1	3.01053	0.10232	NA	0.0581384	NA	NA	0.668224	3.03517	0.321552	0.161226	0.196543
sp|Q16795|NDUA9_HUMAN	NADH dehydrogenase [ubiquinone] 1 alpha subcomplex subunit 9, mitochondrial OS=Homo sapiens GN=NDUFA9 PE=1 SV=2	2.76674	0.116083	NA	0.0603461	NA	NA	0.168916	0.524581	0.0864519	0	0.10876
sp|P09972|ALDOC_HUMAN	Fructose-bisphosphate aldolase C OS=Homo sapiens GN=ALDOC PE=1 SV=2	2.40817	0.122433	NA	0.0656501	NA	0.0814413	0.260157	0.513023	0.229678	0.349209	0.206146
sp|Q14011|CIRBP_HUMAN	Cold-inducible RNA-binding protein OS=Homo sapiens GN=CIRBP PE=1 SV=1	2.22312	0.125779	0.038675	0.0690645	0.337872	NA	1.98132	1.85012	1.22236	0.0705523	0.171207
sp|Q9BWJ5|SF3B5_HUMAN	Splicing factor 3B subunit 5 OS=Homo sapiens GN=SF3B5 PE=1 SV=1	2.16114	0.148249	0.0936267	0.0828906	NA	NA	2.39557	2.49855	0.87911	0.452902	0.178965
sp|P31040|DHSA_HUMAN	Succinate dehydrogenase [ubiquinone] flavoprotein subunit, mitochondrial OS=Homo sapiens GN=SDHA PE=1 SV=2	2.13355	0.151495	NA	0.124153	NA	0.0585475	0	0.590481	0	0.4482	0.141586
sp|Q5H9R7|PP6R3_HUMAN	Serine/threonine-protein phosphatase 6 regulatory subunit 3 OS=Homo sapiens GN=PPP6R3 PE=1 SV=2	2.24038	0.154292	NA	0.085753	NA	NA	0.643726	2.04246	0.151217	0	0.176871
sp|Q96PZ0|PUS7_HUMAN	Pseudouridylate synthase 7 homolog OS=Homo sapiens GN=PUS7 PE=1 SV=2	2.05817	0.16078	0.0276692	0.496296	NA	NA	0.450771	1.02373	0.293107	0	0.126552
sp|P41212|ETV6_HUMAN	Transcription factor ETV6 OS=Homo sapiens GN=ETV6 PE=1 SV=1	2.14144	0.163112	NA	0.0903929	NA	NA	0.367138	1.68205	0	0	0.0792833
sp|O75475|PSIP1_HUMAN	PC4 and SFRS1-interacting protein OS=Homo sapiens GN=PSIP1 PE=1 SV=1	1.89943	0.171211	0.217476	0.121038	0.0384091	NA	0.686689	0.684861	0.369376	0	0.172369
sp|O43242|PSMD3_HUMAN	26S proteasome non-ATPase regulatory subunit 3 OS=Homo sapiens GN=PSMD3 PE=1 SV=2	1.92545	0.178732	NA	0.108017	0.0793595	NA	0	0.725263	0.411188	0.204235	0.208471
sp|Q13151|ROA0_HUMAN	Heterogeneous nuclear ribonucleoprotein A0 OS=Homo sapiens GN=HNRNPA0 PE=1 SV=1	1.84924	0.179731	0.0980851	0.373658	0.0372831	NA	0.511201	1.10982	0.439367	0	0.158801
sp|Q12788|TBL3_HUMAN	Transducin beta-like protein 3 OS=Homo sapiens GN=TBL3 PE=1 SV=2	1.91413	0.180364	0.196818	0.0586997	NA	NA	1.69015	2.27802	0.847216	0.220696	0.193441
sp|P08311|CATG_HUMAN	Cathepsin G OS=Homo sapiens GN=CTSG PE=1 SV=2	1.91319	0.180501	0.110822	0.0828812	NA	NA	0.531891	1.84773	0.228552	0.106019	0.102482
sp|P57737|CORO7_HUMAN	Coronin-7 OS=Homo sapiens GN=CORO7 PE=1 SV=2	1.77571	0.193056	0.0344391	0.28232	0.13031	NA	0.351567	0.812176	0.672885	0	0.238958
sp|Q9H0R4|HDHD2_HUMAN	Haloacid dehalogenase-like hydrolase domain-containing protein 2 OS=Homo sapiens GN=HDHD2 PE=1 SV=1	1.79333	0.198878	NA	0.0770814	NA	0.137944	0.179405	0.592127	0.23031	0.440637	0.235029
sp|Q96T76|MMS19_HUMAN	MMS19 nucleotide excision repair protein homolog OS=Homo sapiens GN=MMS19 PE=1 SV=2	1.73013	0.201847	0.0574952	0.499355	0.0648244	NA	0.509186	1.06082	0.517123	0	0.188484
sp|Q14139|UBE4A_HUMAN	Ubiquitin conjugation factor E4 A OS=Homo sapiens GN=UBE4A PE=1 SV=2	1.73009	0.201855	0.0934526	0.500486	0.0431921	NA	0.662204	1.0113	0.440562	0	0.194894
sp|P45974|UBP5_HUMAN	Ubiquitin carboxyl-terminal hydrolase 5 OS=Homo sapiens GN=USP5 PE=1 SV=2	1.72293	0.203276	0.34677	0.167914	0.0318388	NA	0.831498	0.616403	0.521322	0.0983343	0.19706
sp|O60493|SNX3_HUMAN	Sorting nexin-3 OS=Homo sapiens GN=SNX3 PE=1 SV=3	1.72238	0.210746	0.0562186	0.257156	NA	NA	2.36098	0.807946	0.153341	0	0.153893
sp|O14976|GAK_HUMAN	Cyclin-G-associated kinase OS=Homo sapiens GN=GAK PE=1 SV=2	1.71956	0.211235	0.0403385	0.381244	NA	NA	0.47692	1.17231	0.365511	0	0.131327
sp|Q9UQ35|SRRM2_HUMAN	Serine/arginine repetitive matrix protein 2 OS=Homo sapiens GN=SRRM2 PE=1 SV=2	1.65853	0.216539	0.0441683	0.196688	0.237335	NA	3.70387	3.09934	2.09477	0.161604	0.274331
sp|Q9UK76|HN1_HUMAN	Hematological and neurological expressed 1 protein OS=Homo sapiens GN=HN1 PE=1 SV=3	1.6803	0.218161	0.0874855	0.123779	NA	NA	0.507334	0.612617	0.24513	0	0.235001
sp|Q9Y4W6|AFG32_HUMAN	AFG3-like protein 2 OS=Homo sapiens GN=AFG3L2 PE=1 SV=2	1.62203	0.224469	0.356625	0.150112	0.0416219	NA	1.14768	1.44493	0.448502	0.0993475	0.0853008
sp|Q8NI27|THOC2_HUMAN	THO complex subunit 2 OS=Homo sapiens GN=THOC2 PE=1 SV=2	1.59033	0.225708	NA	0.123143	NA	NA	0.0930325	1.74778	0.102341	0	0.158577
sp|P37198|NUP62_HUMAN	Nuclear pore glycoprotein p62 OS=Homo sapiens GN=NUP62 PE=1 SV=3	1.52113	0.235607	NA	0.128297	NA	NA	0.922817	1.66586	0.210899	0	0.128177
sp|Q53GS9|SNUT2_HUMAN	U4/U6.U5 tri-snRNP-associated protein 2 OS=Homo sapiens GN=USP39 PE=1 SV=2	1.56178	0.240677	0.0994971	0.136258	NA	NA	0.499245	1.66542	0.252831	0	0.188022
sp|P52701|MSH6_HUMAN	DNA mismatch repair protein Msh6 OS=Homo sapiens GN=MSH6 PE=1 SV=2	1.46054	0.244743	NA	0.12261	NA	NA	0.0683249	0.638633	0.0713923	0	0.0730673
sp|Q15813|TBCE_HUMAN	Tubulin-specific chaperone E OS=Homo sapiens GN=TBCE PE=1 SV=1	1.51362	0.2499	0.275928	0.447081	0.029845	NA	0.776698	0.958276	0.47485	0.0705523	0.136638
sp|Q9UBB4|ATX10_HUMAN	Ataxin-10 OS=Homo sapiens GN=ATXN10 PE=1 SV=1	1.50872	0.251119	0.17617	0.218952	0.0523657	NA	0.765377	1.18338	0.592703	0.170468	0.12371
sp|Q9UKX7|NUP50_HUMAN	Nuclear pore complex protein Nup50 OS=Homo sapiens GN=NUP50 PE=1 SV=2	1.47646	0.258511	0.273008	0.065463	NA	NA	0.756418	0.596534	0.208793	0	0.179165
tr|Q0PWM2|Q0PWM2_HUMAN	Tyrosine hydroxylase isoform D2,8,9 OS=Homo sapiens GN=TH PE=2 SV=1	1.36681	0.259816	NA	0.129682	NA	NA	0.426831	0.570242	0.364933	0.113475	0.13421
sp|O96019|ACL6A_HUMAN	Actin-like protein 6A OS=Homo sapiens GN=ACTL6A PE=1 SV=1	1.45697	0.264392	NA	0.105875	0.282593	0.0764022	0.169501	0.564645	0.787243	0.4873	0.192992
sp|Q53EL6|PDCD4_HUMAN	Programmed cell death protein 4 OS=Homo sapiens GN=PDCD4 PE=1 SV=2	1.33743	0.264793	NA	0.142853	NA	NA	0.331679	1.66927	0.152449	0	0.0561421
sp|P0C7P4|UCRIL_HUMAN	Putative cytochrome b-c1 complex subunit Rieske-like protein 1 OS=Homo sapiens GN=UQCRFS1P1 PE=5 SV=1	1.4504	0.266129	0.50117	0.265285	NA	0.035162	1.02338	1.86206	0.637387	3.15044	0.221753
sp|Q8IYS1|P20D2_HUMAN	Peptidase M20 domain-containing protein 2 OS=Homo sapiens GN=PM20D2 PE=1 SV=2	1.42265	0.273603	0.0869729	0.274266	0.0916529	NA	0.543969	1.4575	0.54628	0	0.189219
sp|O00391|QSOX1_HUMAN	Sulfhydryl oxidase 1 OS=Homo sapiens GN=QSOX1 PE=1 SV=3	1.40836	0.273818	0.0858607	0.182572	NA	NA	0.70854	0.786408	0	0	0.109602
sp|Q99873|ANM1_HUMAN	Protein arginine N-methyltransferase 1 OS=Homo sapiens GN=PRMT1 PE=1 SV=2	1.27996	0.274902	NA	0.147933	NA	NA	0	1.81784	0.178118	0.19354	0.151134
sp|O75822|EIF3J_HUMAN	Eukaryotic translation initiation factor 3 subunit J OS=Homo sapiens GN=EIF3J PE=1 SV=2	1.41255	0.276376	0.0623888	0.136221	0.411188	NA	2.82365	2.27643	0.824627	0.285369	0.265683
sp|Q9Y606|TRUA_HUMAN	tRNA pseudouridine synthase A, mitochondrial OS=Homo sapiens GN=PUS1 PE=1 SV=3	1.26805	0.277063	NA	0.149008	NA	NA	0	1.77699	0.338842	0.186731	0.21291
sp|Q9UKN8|TF3C4_HUMAN	General transcription factor 3C polypeptide 4 OS=Homo sapiens GN=GTF3C4 PE=1 SV=2	1.24379	0.281533	NA	0.140833	NA	NA	0.241414	0.594455	0.152939	0	0.0898607
sp|Q09161|NCBP1_HUMAN	Nuclear cap-binding protein subunit 1 OS=Homo sapiens GN=NCBP1 PE=1 SV=1	1.34652	0.295261	0.50852	0.411693	0.0327066	NA	1.04102	1.11401	0.387395	0.208975	0.353599
sp|O60841|IF2P_HUMAN	Eukaryotic translation initiation factor 5B OS=Homo sapiens GN=EIF5B PE=1 SV=4	1.29411	0.30185	0.109207	0.173078	NA	NA	0.39134	1.5668	0.151652	0	0.320311
sp|Q96IJ6|GMPPA_HUMAN	Mannose-1-phosphate guanyltransferase alpha OS=Homo sapiens GN=GMPPA PE=1 SV=1	1.12951	0.303966	NA	0.1629	NA	NA	0.727429	1.68077	0.224018	0	0.123642
sp|Q9UK45|LSM7_HUMAN	U6 snRNA-associated Sm-like protein LSm7 OS=Homo sapiens GN=LSM7 PE=1 SV=1	1.285	0.304219	0.0603675	0.443835	NA	NA	0.599104	1.09878	0.157297	0.0832607	0.158943
sp|Q7Z6Z7|HUWE1_HUMAN	E3 ubiquitin-protein ligase HUWE1 OS=Homo sapiens GN=HUWE1 PE=1 SV=3	1.3113	0.305882	0.199101	0.145276	0.0910124	NA	0.766202	1.36479	0.613537	0.0882379	0.162585
sp|Q14166|TTL12_HUMAN	Tubulin--tyrosine ligase-like protein 12 OS=Homo sapiens GN=TTLL12 PE=1 SV=2	1.07555	0.315415	NA	0.169111	NA	NA	0.380282	2.34348	0.0893314	0	0.278669
sp|Q05315|LPPL_HUMAN	Eosinophil lysophospholipase OS=Homo sapiens GN=CLC PE=1 SV=3	1.22309	0.334267	0.0591779	0.409233	NA	0.208704	3.52811	1.84414	0.323469	0.560679	0.343501
sp|Q9NQR4|NIT2_HUMAN	Omega-amidase NIT2 OS=Homo sapiens GN=NIT2 PE=1 SV=1	1.17242	0.33532	0.241809	0.109869	NA	NA	1.56958	2.14755	0.317662	0.477827	0.184578
sp|P11388|TOP2A_HUMAN	DNA topoisomerase 2-alpha OS=Homo sapiens GN=TOP2A PE=1 SV=3	0.986773	0.335606	NA	0.178962	NA	NA	0.233656	1.54562	0	0	0.193593
sp|P13073|COX41_HUMAN	Cytochrome c oxidase subunit 4 isoform 1, mitochondrial OS=Homo sapiens GN=COX4I1 PE=1 SV=1	1.18748	0.346484	0.350464	0.23508	NA	0.0582905	1.09905	0.741358	0.245597	0.291209	0.264568
sp|Q8N684|CPSF7_HUMAN	Cleavage and polyadenylation specificity factor subunit 7 OS=Homo sapiens GN=CPSF7 PE=1 SV=1	1.1718	0.35201	0.186692	0.356894	0.063812	NA	0.752955	1.19213	0.491668	0.136025	0.222926
sp|O43156|TTI1_HUMAN	TEL2-interacting protein 1 homolog OS=Homo sapiens GN=TTI1 PE=1 SV=3	0.900916	0.356928	NA	0.178213	NA	NA	0.24644	0.83158	0	0	0.148519
sp|Q9P258|RCC2_HUMAN	Protein RCC2 OS=Homo sapiens GN=RCC2 PE=1 SV=2	1.13526	0.365235	0.0893424	0.288625	0.170599	NA	1.48809	1.20402	0.691774	0.0677341	0.211572
sp|Q13547|HDAC1_HUMAN	Histone deacetylase 1 OS=Homo sapiens GN=HDAC1 PE=1 SV=1	1.12157	0.370317	0.332215	0.0766137	0.202769	NA	1.26797	1.81457	0.730243	0.281023	0.181134
sp|O94776|MTA2_HUMAN	Metastasis-associated protein MTA2 OS=Homo sapiens GN=MTA2 PE=1 SV=1	0.845128	0.371852	NA	0.197895	NA	NA	0.972922	1.47552	0	0	0.118678
sp|P03905|NU4M_HUMAN	NADH-ubiquinone oxidoreductase chain 4 OS=Homo sapiens GN=MT-ND4 PE=1 SV=1	1.10316	0.37727	0.406896	0.164705	0.0755682	NA	0.908279	0.760115	0.507284	0.152945	0.187021
sp|Q96PK6|RBM14_HUMAN	RNA-binding protein 14 OS=Homo sapiens GN=RBM14 PE=1 SV=2	1.10121	0.378012	0.10412	0.413676	0.137924	NA	2.25883	1.62147	2.03393	0	0.213773
sp|Q9UI30|TR112_HUMAN	tRNA methyltransferase 112 homolog OS=Homo sapiens GN=TRMT112 PE=1 SV=1	1.02873	0.380353	0.129168	0.196202	NA	NA	0.555466	0.648055	0.379971	0	0.12843
sp|A6NHG4|DDTL_HUMAN	D-dopachrome decarboxylase-like protein OS=Homo sapiens GN=DDTL PE=2 SV=1	0.807043	0.382575	NA	0.191123	NA	NA	0.228014	0.576102	0.478809	0.451061	0.231604
sp|O14732|IMPA2_HUMAN	Inositol monophosphatase 2 OS=Homo sapiens GN=IMPA2 PE=1 SV=1	1.08855	0.382882	0.161277	0.494013	0.07375	NA	0.577197	1.0022	0.544473	0.277414	0.167281
sp|Q9UBQ7|GRHPR_HUMAN	Glyoxylate reductase/hydroxypyruvate reductase OS=Homo sapiens GN=GRHPR PE=1 SV=1	1.05796	0.3949	0.268211	0.0878578	0.249855	NA	1.11806	1.61649	1.13493	0.595903	0.1474
sp|Q96EY7|PTCD3_HUMAN	Pentatricopeptide repeat-containing protein 3, mitochondrial OS=Homo sapiens GN=PTCD3 PE=1 SV=3	1.05096	0.397705	0.39234	0.312198	0.0565599	NA	0.944652	1.26644	0.505707	0.0866938	0.140788
sp|Q14683|SMC1A_HUMAN	Structural maintenance of chromosomes protein 1A OS=Homo sapiens GN=SMC1A PE=1 SV=2	1.04577	0.399797	0.0722921	0.340159	0.196829	NA	0.407499	0.841953	0.583737	0.231789	0.219094
sp|Q9BVK6|TMED9_HUMAN	Transmembrane emp24 domain-containing protein 9 OS=Homo sapiens GN=TMED9 PE=1 SV=2	1.0422	0.401241	0.134246	0.233536	NA	0.135017	0.675631	0.746846	0.335706	0.670527	0.128291
sp|P26373|RL13_HUMAN	60S ribosomal protein L13 OS=Homo sapiens GN=RPL13 PE=1 SV=4	0.954292	0.40634	NA	0.337268	NA	0.108816	0.439756	1.02058	0.277339	1.53477	0.294306
sp|Q9NVI1|FANCI_HUMAN	Fanconi anemia group I protein OS=Homo sapiens GN=FANCI PE=1 SV=4	0.723292	0.407858	NA	0.203573	NA	NA	0.129362	0.796672	0	0	0.0854634
sp|Q7Z7A4|PXK_HUMAN	PX domain-containing protein kinase-like protein OS=Homo sapiens GN=PXK PE=1 SV=1	0.718541	0.409368	NA	0.216427	NA	NA	0.168478	1.31262	0	0	0.129667
sp|Q8N543|OGFD1_HUMAN	2-oxoglutarate and iron-dependent oxygenase domain-containing protein 1 OS=Homo sapiens GN=OGFOD1 PE=1 SV=1	0.630402	0.439052	NA	0.219289	NA	NA	0.259001	0.719317	0	0	0.0930093
sp|P18858|DNLI1_HUMAN	DNA ligase 1 OS=Homo sapiens GN=LIG1 PE=1 SV=1	0.862088	0.441345	0.103404	0.39579	NA	NA	0.666938	1.05077	0	0	0.0847351
sp|P62241|RS8_HUMAN	40S ribosomal protein S8 OS=Homo sapiens GN=RPS8 PE=1 SV=2	0.584384	0.455943	NA	0.24044	NA	NA	0.373734	3.37519	0	0	0.321792
sp|Q9UNL2|SSRG_HUMAN	Translocon-associated protein subunit gamma OS=Homo sapiens GN=SSR3 PE=1 SV=1	0.90946	0.458799	NA	0.0801497	0.360816	0.279352	0.323293	0.677696	1.17797	1.27902	0.120986
sp|Q9BQ67|GRWD1_HUMAN	Glutamate-rich WD repeat-containing protein 1 OS=Homo sapiens GN=GRWD1 PE=1 SV=1	0.784487	0.473456	0.34617	0.13493	NA	NA	1.18086	2.0916	0.553784	0	0.18308
sp|O94804|STK10_HUMAN	Serine/threonine-protein kinase 10 OS=Homo sapiens GN=STK10 PE=1 SV=1	0.878165	0.473498	0.350551	0.390337	0.0689566	NA	0.912773	0.897484	0.538688	0.20335	0.139322
sp|Q96K17|BT3L4_HUMAN	Transcription factor BTF3 homolog 4 OS=Homo sapiens GN=BTF3L4 PE=1 SV=1	0.86856	0.478099	0.38793	0.216745	0.0946488	NA	1.14175	0.593629	0.591575	0.287553	0.137658
sp|O95232|LC7L3_HUMAN	Luc7-like protein 3 OS=Homo sapiens GN=LUC7L3 PE=1 SV=2	0.864175	0.480214	0.198994	0.233854	0.129194	NA	0.566618	0.641828	0.618295	0.215504	0.216198
sp|O60287|NPA1P_HUMAN	Nucleolar pre-ribosomal-associated protein 1 OS=Homo sapiens GN=URB1 PE=1 SV=4	0.484328	0.496649	NA	0.260804	NA	NA	0.0733338	1.28112	0	0	0.0805091
sp|O43324|MCA3_HUMAN	Eukaryotic translation elongation factor 1 epsilon-1 OS=Homo sapiens GN=EEF1E1 PE=1 SV=1	0.816029	0.50402	0.220764	0.115472	0.41093	NA	1.14823	1.68792	0.855322	0	0.189017
sp|P11166|GTR1_HUMAN	Solute carrier family 2, facilitated glucose transporter member 1 OS=Homo sapiens GN=SLC2A1 PE=1 SV=2	0.713735	0.505043	0.166112	0.258036	NA	NA	0.701994	1.27525	0.087053	0.364227	0.0923817
sp|O14920|IKKB_HUMAN	Inhibitor of nuclear factor kappa-B kinase subunit beta OS=Homo sapiens GN=IKBKB PE=1 SV=1	0.805243	0.509502	0.189014	0.26463	0.137758	NA	0.788106	0.688237	0.629189	0.161794	0.197637
sp|Q15061|WDR43_HUMAN	WD repeat-containing protein 43 OS=Homo sapiens GN=WDR43 PE=1 SV=3	0.704068	0.50954	0.382824	0.14609	NA	NA	0.950533	1.42452	0.219383	0.12897	0.168212
sp|Q9UQE7|SMC3_HUMAN	Structural maintenance of chromosomes protein 3 OS=Homo sapiens GN=SMC3 PE=1 SV=2	0.696509	0.513089	0.208849	0.210355	NA	NA	0.647362	1.49354	0.362041	0.288442	0.143055
sp|Q12907|LMAN2_HUMAN	Vesicular integral-membrane protein VIP36 OS=Homo sapiens GN=LMAN2 PE=1 SV=1	0.690853	0.515762	NA	0.349551	NA	0.145095	0.328979	0.849786	0.425986	1.50602	0.0950284
sp|Q9Y3D6|FIS1_HUMAN	Mitochondrial fission 1 protein OS=Homo sapiens GN=FIS1 PE=1 SV=2	0.684636	0.518718	NA	0.437081	NA	0.134547	0.515488	0.886332	0	0.639667	0.146872
sp|P09234|RU1C_HUMAN	U1 small nuclear ribonucleoprotein C OS=Homo sapiens GN=SNRPC PE=1 SV=1	0.673543	0.524041	0.283752	0.16073	NA	NA	0.716213	0.720578	0.204074	0.207635	0.140108
sp|Q9NX55|HYPK_HUMAN	Huntingtin-interacting protein K OS=Homo sapiens GN=HYPK PE=1 SV=2	0.776993	0.524123	0.190948	0.262507	0.182035	NA	1.36919	1.25738	1.39501	0.0964734	0.103085
sp|Q9ULC4|MCTS1_HUMAN	Malignant T cell-amplified sequence 1 OS=Homo sapiens GN=MCTS1 PE=1 SV=1	0.662168	0.529564	NA	0.135192	NA	0.442749	0.0932748	0.66076	0.205214	1.07041	0.144258
sp|P62847|RS24_HUMAN	40S ribosomal protein S24 OS=Homo sapiens GN=RPS24 PE=1 SV=1	0.756651	0.534887	NA	0.337203	0.162913	0.161441	0.0870258	1.28136	0.590158	0.558132	0.203803
sp|Q99808|S29A1_HUMAN	Equilibrative nucleoside transporter 1 OS=Homo sapiens GN=SLC29A1 PE=1 SV=3	0.730167	0.549199	0.167698	0.31014	0.159783	NA	0.640317	0.971265	0.544519	0.225192	0.198701
sp|Q9HAV4|XPO5_HUMAN	Exportin-5 OS=Homo sapiens GN=XPO5 PE=1 SV=1	0.72726	0.550791	0.377979	0.361319	0.0897831	NA	0.920939	1.1313	0.653411	0.0958359	0.155719
sp|Q96RS6|NUDC1_HUMAN	NudC domain-containing protein 1 OS=Homo sapiens GN=NUDCD1 PE=1 SV=2	0.358747	0.557753	NA	0.278017	NA	NA	0.460564	0.856932	0.546932	0.161322	0.130817
sp|P37268|FDFT_HUMAN	Squalene synthase OS=Homo sapiens GN=FDFT1 PE=1 SV=1	0.58812	0.567157	0.354381	0.164425	NA	NA	1.3779	0.739383	0	0.23149	0.19255
sp|O75792|RNH2A_HUMAN	Ribonuclease H2 subunit A OS=Homo sapiens GN=RNASEH2A PE=1 SV=2	0.585101	0.568752	0.321557	0.175379	NA	NA	1.28578	0.714062	0.311011	0.14427	0.135597
sp|Q15424|SAFB1_HUMAN	Scaffold attachment factor B1 OS=Homo sapiens GN=SAFB PE=1 SV=4	0.675248	0.579958	0.104333	0.36087	0.427025	NA	2.2436	1.45717	1.243	0.183864	0.224873
sp|P24158|PRTN3_HUMAN	Myeloblastin OS=Homo sapiens GN=PRTN3 PE=1 SV=3	0.660558	0.588432	0.181412	0.301085	NA	0.182559	0.745586	1.10659	0.162926	0.470167	0.322361
sp|A0FGR8|ESYT2_HUMAN	Extended synaptotagmin-2 OS=Homo sapiens GN=ESYT2 PE=1 SV=1	0.540898	0.592701	NA	0.23072	0.23625	NA	0.365286	0.842227	0.580615	0.259741	0.149927
sp|Q9UHD8|SEPT9_HUMAN	Septin-9 OS=Homo sapiens GN=SEPT9 PE=1 SV=2	0.291984	0.596539	NA	0.296586	NA	NA	0.316167	1.06127	0	0	0.148398
sp|Q02880|TOP2B_HUMAN	DNA topoisomerase 2-beta OS=Homo sapiens GN=TOP2B PE=1 SV=3	0.286506	0.599973	NA	0.298232	NA	NA	0.181341	0.988614	0	0	0.230604
sp|Q12769|NU160_HUMAN	Nuclear pore complex protein Nup160 OS=Homo sapiens GN=NUP160 PE=1 SV=3	0.636212	0.602706	0.184391	0.451459	0.151105	NA	0.718822	1.1157	0.631734	0.093862	0.227705
sp|Q52LJ0|FA98B_HUMAN	Protein FAM98B OS=Homo sapiens GN=FAM98B PE=1 SV=1	0.277968	0.605412	NA	0.313386	NA	NA	0.292721	1.30703	0.0940798	0	0.117887
sp|O43143|DHX15_HUMAN	Putative pre-mRNA-splicing factor ATP-dependent RNA helicase DHX15 OS=Homo sapiens GN=DHX15 PE=1 SV=2	0.627184	0.608071	0.334497	0.114668	0.468574	NA	0.853243	1.65262	0.959296	0.225185	0.243349
sp|Q99798|ACON_HUMAN	Aconitate hydratase, mitochondrial OS=Homo sapiens GN=ACO2 PE=1 SV=2	0.62417	0.609871	NA	0.114827	0.436384	0.310514	0.177948	0.382129	0.959748	0.675251	0.241472
sp|Q13451|FKBP5_HUMAN	Peptidyl-prolyl cis-trans isomerase FKBP5 OS=Homo sapiens GN=FKBP5 PE=1 SV=2	0.27087	0.610015	NA	0.303386	NA	NA	0.348362	1.23272	0.249113	0	0.21767
sp|O14929|HAT1_HUMAN	Histone acetyltransferase type B catalytic subunit OS=Homo sapiens GN=HAT1 PE=1 SV=1	0.615363	0.615155	0.330716	0.150056	0.257335	NA	0.856737	1.51747	0.735548	0.0643378	0.198845
sp|Q13616|CUL1_HUMAN	Cullin-1 OS=Homo sapiens GN=CUL1 PE=1 SV=2	0.603613	0.622262	0.306896	0.437297	0.113709	NA	0.821277	1.10363	0.661374	0.226114	0.179392
sp|P52732|KIF11_HUMAN	Kinesin-like protein KIF11 OS=Homo sapiens GN=KIF11 PE=1 SV=2	0.602468	0.622958	0.38058	0.490645	0.104112	NA	1.092	0.985319	0.689717	0	0.105353
sp|Q92556|ELMO1_HUMAN	Engulfment and cell motility protein 1 OS=Homo sapiens GN=ELMO1 PE=1 SV=2	0.601353	0.623635	0.248511	0.160421	0.35564	NA	1.2719	1.42352	0.805173	0	0.116702
sp|P21333|FLNA_HUMAN	Filamin-A OS=Homo sapiens GN=FLNA PE=1 SV=4	0.242107	0.629502	NA	0.325154	NA	NA	0	1.04525	0	0.00540604	0.0785499
tr|E5RFV3|E5RFV3_HUMAN	Uncharacterized protein OS=Homo sapiens GN=SREK1 PE=4 SV=1	0.469842	0.633617	0.193636	0.33666	NA	NA	0.718242	1.33446	0.370026	0.506834	0.16223
sp|Q9NR28|DBLOH_HUMAN	Diablo homolog, mitochondrial OS=Homo sapiens GN=DIABLO PE=1 SV=1	0.57161	0.641944	0.189043	0.327343	0.240878	NA	1.4031	1.17886	1.33824	0.209889	0.100044
sp|O43396|TXNL1_HUMAN	Thioredoxin-like protein 1 OS=Homo sapiens GN=TXNL1 PE=1 SV=3	0.570091	0.642891	0.218482	0.180084	0.410496	NA	1.49275	1.46594	0.869552	0.28678	0.157176
sp|O94925|GLSK_HUMAN	Glutaminase kidney isoform, mitochondrial OS=Homo sapiens GN=GLS PE=1 SV=1	0.453893	0.643233	0.188191	0.454284	NA	NA	1.63867	1.54497	0.421798	0	0.205985
sp|Q92990|GLMN_HUMAN	Glomulin OS=Homo sapiens GN=GLMN PE=1 SV=2	0.429485	0.658269	0.249816	0.295781	NA	NA	1.89369	2.40205	0.582763	0	0.216518
sp|Q14165|MLEC_HUMAN	Malectin OS=Homo sapiens GN=MLEC PE=1 SV=1	0.424216	0.661567	0.23764	0.28942	NA	NA	0.607798	1.30015	0.101735	0.30904	0.148853
sp|Q14061|COX17_HUMAN	Cytochrome c oxidase copper chaperone OS=Homo sapiens GN=COX17 PE=1 SV=2	0.535313	0.664835	0.383772	0.129822	0.371364	NA	1.16928	0.760115	1.19312	0.241303	0.148599
sp|Q14240|IF4A2_HUMAN	Eukaryotic initiation factor 4A-II OS=Homo sapiens GN=EIF4A2 PE=1 SV=2	0.194672	0.665076	NA	0.342226	NA	NA	0.282771	1.12055	0.103688	0	0.209612
sp|O95487|SC24B_HUMAN	Protein transport protein Sec24B OS=Homo sapiens GN=SEC24B PE=1 SV=2	0.534874	0.665115	0.20705	0.250178	0.242087	NA	0.75436	0.883149	0.789604	0	0.162567
sp|Q92900|RENT1_HUMAN	Regulator of nonsense transcripts 1 OS=Homo sapiens GN=UPF1 PE=1 SV=2	0.188078	0.670425	NA	0.344743	NA	NA	0	1.18234	0.348239	0	0.0709429
sp|Q96L21|RL10L_HUMAN	60S ribosomal protein L10-like OS=Homo sapiens GN=RPL10L PE=1 SV=3	0.525025	0.67143	0.427969	0.136735	NA	0.366022	1.28269	2.09609	0.699986	1.46399	0.17258
sp|Q9BW27|NUP85_HUMAN	Nuclear pore complex protein Nup85 OS=Homo sapiens GN=NUP85 PE=1 SV=1	0.179305	0.677719	NA	0.336558	NA	NA	0.293335	0.845833	0	0	0.117014
sp|O43823|AKAP8_HUMAN	A-kinase anchor protein 8 OS=Homo sapiens GN=AKAP8 PE=1 SV=1	0.388677	0.684303	0.395493	0.203985	NA	NA	0.890597	0.702309	0.19805	0	0.13625
sp|P55795|HNRH2_HUMAN	Heterogeneous nuclear ribonucleoprotein H2 OS=Homo sapiens GN=HNRNPH2 PE=1 SV=1	0.170336	0.685398	NA	0.352236	NA	NA	0.406466	1.18154	0.561004	0	0.127551
sp|Q15555|MARE2_HUMAN	Microtubule-associated protein RP/EB family member 2 OS=Homo sapiens GN=MAPRE2 PE=1 SV=1	0.490106	0.694148	0.397398	0.365959	0.153202	NA	1.95676	1.44563	2.17696	0	0.191622
sp|O43464|HTRA2_HUMAN	Serine protease HTRA2, mitochondrial OS=Homo sapiens GN=HTRA2 PE=1 SV=2	0.150964	0.702837	NA	0.348363	NA	NA	0.527133	1.07798	0	0	0.18164
sp|Q01658|NC2B_HUMAN	Protein Dr1 OS=Homo sapiens GN=DR1 PE=1 SV=1	0.469881	0.707534	0.373704	0.383283	NA	0.144726	0.890937	0.881721	0.362167	0.587827	0.114761
sp|Q9Y5S9|RBM8A_HUMAN	RNA-binding protein 8A OS=Homo sapiens GN=RBM8A PE=1 SV=1	0.465629	0.710368	0.40558	0.145912	0.453833	NA	0.893947	1.69873	0.78865	0.192101	0.262334
sp|Q92835|SHIP1_HUMAN	Phosphatidylinositol-3,4,5-trisphosphate 5-phosphatase 1 OS=Homo sapiens GN=INPP5D PE=1 SV=2	0.139814	0.71347	NA	0.353592	NA	NA	0.146496	1.15966	0.467298	0.678982	0.133861
sp|P67775|PP2AA_HUMAN	Serine/threonine-protein phosphatase 2A catalytic subunit alpha isoform OS=Homo sapiens GN=PPP2CA PE=1 SV=1	0.344886	0.713538	0.212079	0.401712	NA	NA	0.871913	1.21285	0	0.289288	0.163048
sp|Q9H845|ACAD9_HUMAN	Acyl-CoA dehydrogenase family member 9, mitochondrial OS=Homo sapiens GN=ACAD9 PE=1 SV=1	0.344062	0.714101	NA	0.48261	0.204597	NA	0.503473	1.00111	0.792848	0	0.109545
sp|Q14258|TRI25_HUMAN	E3 ubiquitin/ISG15 ligase TRIM25 OS=Homo sapiens GN=TRIM25 PE=1 SV=2	0.340553	0.716506	0.362041	0.250327	NA	NA	2.03703	2.35441	0.440746	0.259104	0.240624
sp|P33240|CSTF2_HUMAN	Cleavage stimulation factor subunit 2 OS=Homo sapiens GN=CSTF2 PE=1 SV=1	0.453306	0.718621	0.294787	0.280627	0.203192	NA	0.807238	1.26622	0.732913	0.328701	0.118167
sp|Q9H307|PININ_HUMAN	Pinin OS=Homo sapiens GN=PNN PE=1 SV=4	0.33439	0.720752	0.383859	0.225182	NA	NA	0.92219	0.902136	0.432944	0	0.178494
sp|Q9H0A0|NAT10_HUMAN	N-acetyltransferase 10 OS=Homo sapiens GN=NAT10 PE=1 SV=2	0.129975	0.723266	NA	0.369963	NA	NA	0	3.99003	0	0	0.386361
sp|Q8N163|K1967_HUMAN	Protein KIAA1967 OS=Homo sapiens GN=KIAA1967 PE=1 SV=2	0.444115	0.724813	0.264768	0.275772	0.2303	NA	0.815086	1.2389	0.813412	0.19557	0.181971
sp|P42285|SK2L2_HUMAN	Superkiller viralicidic activity 2-like 2 OS=Homo sapiens GN=SKIV2L2 PE=1 SV=3	0.442683	0.72578	0.428714	0.145987	0.470816	NA	0.857743	1.70017	0.962419	0.249084	0.206112
sp|P34932|HSP74_HUMAN	Heat shock 70 kDa protein 4 OS=Homo sapiens GN=HSPA4 PE=1 SV=4	0.442264	0.726063	0.231422	0.2687	0.272128	NA	0.819044	1.38301	0.647659	0.0814459	0.223351
sp|Q2TAY7|SMU1_HUMAN	WD40 repeat-containing protein SMU1 OS=Homo sapiens GN=SMU1 PE=1 SV=2	0.438008	0.728943	0.143056	0.444808	0.472242	NA	1.51756	0.91441	0.908199	0.124767	0.103093
tr|B9ZVU1|B9ZVU1_HUMAN	Uncharacterized protein OS=Homo sapiens GN=HNRNPD PE=4 SV=1	0.320544	0.730396	NA	0.257923	NA	0.330816	0	0.844942	0.298622	0.875176	0.214906
sp|O75494|SRS10_HUMAN	Serine/arginine-rich splicing factor 10 OS=Homo sapiens GN=SRSF10 PE=1 SV=1	0.433299	0.732137	0.489052	0.345631	0.150021	NA	0.980051	1.10357	0.720151	0.24872	0.103447
sp|Q9Y5B9|SP16H_HUMAN	FACT complex subunit SPT16 OS=Homo sapiens GN=SUPT16H PE=1 SV=1	0.430499	0.734039	0.157679	0.364958	0.470548	NA	1.54263	1.25795	0.988268	0	0.253203
sp|Q6P2E9|EDC4_HUMAN	Enhancer of mRNA-decapping protein 4 OS=Homo sapiens GN=EDC4 PE=1 SV=1	0.117604	0.7362	NA	0.365173	NA	NA	0.941596	1.12757	0.214003	0.22593	0.159946
sp|P98171|RHG04_HUMAN	Rho GTPase-activating protein 4 OS=Homo sapiens GN=ARHGAP4 PE=1 SV=2	0.116278	0.73763	NA	0.376473	NA	NA	0.391252	2.03947	0.653152	0.217016	0.184311
sp|Q9H6R4|NOL6_HUMAN	Nucleolar protein 6 OS=Homo sapiens GN=NOL6 PE=1 SV=2	0.105243	0.749912	NA	0.372152	NA	NA	0.128011	0.874713	0.0704092	0	0.0877863
sp|Q13162|PRDX4_HUMAN	Peroxiredoxin-4 OS=Homo sapiens GN=PRDX4 PE=1 SV=1	0.103732	0.751647	NA	0.383686	NA	NA	0.733382	1.95367	0.214527	0.776662	0.178851
sp|P11216|PYGB_HUMAN	Glycogen phosphorylase, brain form OS=Homo sapiens GN=PYGB PE=1 SV=5	0.393705	0.759269	0.406412	0.259261	0.235289	NA	1.33483	1.38465	1.36316	0.937738	0.154596
sp|Q14690|RRP5_HUMAN	Protein RRP5 homolog OS=Homo sapiens GN=PDCD11 PE=1 SV=3	0.0942396	0.762892	NA	0.388943	NA	NA	0	2.25794	0	0	0.194648
sp|Q9NV88|INT9_HUMAN	Integrator complex subunit 9 OS=Homo sapiens GN=INTS9 PE=1 SV=2	0.0773666	0.78453	NA	0.399205	NA	NA	0.292306	1.20072	0	0.327163	0.119236
sp|Q9BUJ2|HNRL1_HUMAN	Heterogeneous nuclear ribonucleoprotein U-like protein 1 OS=Homo sapiens GN=HNRNPUL1 PE=1 SV=2	0.352392	0.788026	0.476383	0.391328	0.184607	NA	1.10928	1.89621	1.9821	0	0.195942
sp|Q9UNS2|CSN3_HUMAN	COP9 signalosome complex subunit 3 OS=Homo sapiens GN=COPS3 PE=1 SV=3	0.241263	0.788496	0.311896	0.338793	NA	NA	1.45798	0.962073	0	0.791134	0.166784
sp|O75607|NPM3_HUMAN	Nucleoplasmin-3 OS=Homo sapiens GN=NPM3 PE=1 SV=3	0.0737265	0.789526	NA	0.401852	NA	NA	0.113256	0.781295	0	0	0.124455
sp|Q08752|PPID_HUMAN	Peptidyl-prolyl cis-trans isomerase D OS=Homo sapiens GN=PPID PE=1 SV=3	0.238695	0.790463	0.466393	0.25203	NA	NA	1.10388	0.743074	0.429818	0	0.23874
sp|P06132|DCUP_HUMAN	Uroporphyrinogen decarboxylase OS=Homo sapiens GN=UROD PE=1 SV=2	0.347066	0.791759	0.188694	0.328438	0.406952	NA	0.75244	1.17796	0.922675	0.080637	0.0892377
sp|P11172|PYR5_HUMAN	Uridine 5'-monophosphate synthase OS=Homo sapiens GN=UMPS PE=1 SV=1	0.0714031	0.792785	NA	0.403564	NA	NA	0.262939	1.183	0	0	0.125103
sp|O14975|S27A2_HUMAN	Very long-chain acyl-CoA synthetase OS=Homo sapiens GN=SLC27A2 PE=1 SV=2	0.0693886	0.795657	NA	0.394415	NA	NA	0	1.40702	0.554396	0	0.207647
sp|P62333|PRS10_HUMAN	26S protease regulatory subunit 10B OS=Homo sapiens GN=PSMC6 PE=1 SV=1	0.339289	0.797219	0.462911	0.177596	0.484938	NA	1.01999	1.46422	0.993921	0.3582	0.174623
sp|Q12904|AIMP1_HUMAN	Aminoacyl tRNA synthase complex-interacting multifunctional protein 1 OS=Homo sapiens GN=AIMP1 PE=1 SV=2	0.061392	0.807523	NA	0.410543	NA	NA	0.629765	0.925653	0.142975	0	0.155748
sp|P40616|ARL1_HUMAN	ADP-ribosylation factor-like protein 1 OS=Homo sapiens GN=ARL1 PE=1 SV=1	0.061085	0.807994	NA	0.400393	NA	NA	0	1.48201	0	0	0.20067
sp|Q8N1F7|NUP93_HUMAN	Nuclear pore complex protein Nup93 OS=Homo sapiens GN=NUP93 PE=1 SV=2	0.0610126	0.808105	NA	0.410823	NA	NA	0	1.59998	0	0	0.135342
sp|Q15370|ELOB_HUMAN	Transcription elongation factor B polypeptide 2 OS=Homo sapiens GN=TCEB2 PE=1 SV=1	0.312519	0.816069	0.315348	0.387755	0.213667	NA	0.970924	1.08606	0.529456	0.0923097	0.214438
sp|O43423|AN32C_HUMAN	Acidic leucine-rich nuclear phosphoprotein 32 family member C OS=Homo sapiens GN=ANP32C PE=2 SV=1	0.312254	0.816256	NA	0.270861	0.301539	0.322168	0.654304	0.826613	1.59384	0.890473	0.190505
sp|Q09666|AHNK_HUMAN	Neuroblast differentiation-associated protein AHNAK OS=Homo sapiens GN=AHNAK PE=1 SV=2	0.204453	0.817231	0.259333	0.445921	NA	NA	0.586447	0.632195	0	0	0.200018
sp|P23919|KTHY_HUMAN	Thymidylate kinase OS=Homo sapiens GN=DTYMK PE=1 SV=4	0.283079	0.836845	0.455696	0.289196	0.266085	NA	1.00682	1.1494	1.13156	0.375954	0.168453
sp|O95433|AHSA1_HUMAN	Activator of 90 kDa heat shock protein ATPase homolog 1 OS=Homo sapiens GN=AHSA1 PE=1 SV=1	0.179826	0.837113	0.456248	0.291964	NA	NA	1.44384	1.6422	0.517596	0.165649	0.177237
sp|Q9Y376|CAB39_HUMAN	Calcium-binding protein 39 OS=Homo sapiens GN=CAB39 PE=1 SV=1	0.0388813	0.846216	NA	0.429345	NA	NA	0.353472	1.39632	0.465394	0.160945	0.152117
sp|Q15428|SF3A2_HUMAN	Splicing factor 3A subunit 2 OS=Homo sapiens GN=SF3A2 PE=1 SV=2	0.16486	0.849463	0.284023	0.442713	NA	NA	0.728986	1.16292	0.305657	0.116789	0.172705
sp|Q13526|PIN1_HUMAN	Peptidyl-prolyl cis-trans isomerase NIMA-interacting 1 OS=Homo sapiens GN=PIN1 PE=1 SV=1	0.162781	0.851194	0.360542	0.321272	NA	NA	0.816127	0.725848	0.545112	0.160229	0.129821
sp|Q9P0J0|NDUAD_HUMAN	NADH dehydrogenase [ubiquinone] 1 alpha subcomplex subunit 13 OS=Homo sapiens GN=NDUFA13 PE=1 SV=3	0.0360093	0.851929	NA	0.4216	NA	NA	0.357013	0.876334	0	0	0.168061
sp|Q9BTE7|DCNL5_HUMAN	DCN1-like protein 5 OS=Homo sapiens GN=DCUN1D5 PE=1 SV=1	0.0305195	0.863551	NA	0.427222	NA	NA	0.225385	0.949016	0.075161	0	0.0800664
sp|Q9NRN7|ADPPT_HUMAN	L-aminoadipate-semialdehyde dehydrogenase-phosphopantetheinyl transferase OS=Homo sapiens GN=AASDHPPT PE=1 SV=2	0.147109	0.864377	NA	0.418279	0.326901	NA	0.617008	1.61725	1.36988	0	0.206178
sp|P15814|IGLL1_HUMAN	Immunoglobulin lambda-like polypeptide 1 OS=Homo sapiens GN=IGLL1 PE=1 SV=1	0.0292073	0.866486	NA	0.428906	NA	NA	0	0.961929	0	0	0.0403117
sp|Q8IX12|CCAR1_HUMAN	Cell division cycle and apoptosis regulator protein 1 OS=Homo sapiens GN=CCAR1 PE=1 SV=2	0.139467	0.870888	0.432398	0.3255	NA	NA	1.24612	1.67266	0.280107	0	0.154511
sp|Q13442|HAP28_HUMAN	28 kDa heat- and acid-stable phosphoprotein OS=Homo sapiens GN=PDAP1 PE=1 SV=1	0.227878	0.875586	0.453985	0.406838	0.219494	NA	1.04175	1.11124	0.78524	0.121059	0.118545
sp|Q9UKV3|ACINU_HUMAN	Apoptotic chromatin condensation inducer in the nucleus OS=Homo sapiens GN=ACIN1 PE=1 SV=2	0.227779	0.875655	0.248191	0.459504	0.347779	NA	1.5502	1.16344	1.08455	0.187534	0.137341
sp|O60812|HNRCL_HUMAN	Heterogeneous nuclear ribonucleoprotein C-like 1 OS=Homo sapiens GN=HNRNPCL1 PE=1 SV=1	0.213066	0.885847	0.267128	0.410926	0.362986	NA	1.44223	1.06271	1.23069	0.17231	0.217614
sp|Q70J99|UN13D_HUMAN	Protein unc-13 homolog D OS=Homo sapiens GN=UNC13D PE=1 SV=1	0.211573	0.886876	0.291132	0.39319	0.294607	NA	0.701819	0.799527	0.749377	0.108329	0.230094
sp|P46776|RL27A_HUMAN	60S ribosomal protein L27a OS=Homo sapiens GN=RPL27A PE=1 SV=2	0.183982	0.905694	0.486538	0.324799	0.287665	NA	1.03331	1.28277	0.772142	0.311187	0.131972
sp|Q9NVA2|SEP11_HUMAN	Septin-11 OS=Homo sapiens GN=SEPT11 PE=1 SV=3	0.0995274	0.905832	0.47794	0.340758	NA	NA	1.09865	1.30914	0.550152	0.387163	0.163661
sp|Q5JTH9|RRP12_HUMAN	RRP12-like protein OS=Homo sapiens GN=RRP12 PE=1 SV=2	0.0123452	0.912939	NA	0.451974	NA	NA	0	1.49105	0	0	0.139522
sp|O75400|PR40A_HUMAN	Pre-mRNA-processing factor 40 homolog A OS=Homo sapiens GN=PRPF40A PE=1 SV=2	0.0913175	0.913209	0.350077	0.470982	NA	NA	1.41885	0.984144	0.17549	0.381368	0.191388
sp|O43252|PAPS1_HUMAN	Bifunctional 3'-phosphoadenosine 5'-phosphosulfate synthase 1 OS=Homo sapiens GN=PAPSS1 PE=1 SV=2	0.152705	0.926394	0.308839	0.33406	0.405961	NA	0.913125	0.962165	0.809259	0.502642	0.163426
sp|Q00534|CDK6_HUMAN	Cyclin-dependent kinase 6 OS=Homo sapiens GN=CDK6 PE=1 SV=1	0.00785111	0.930516	NA	0.460711	NA	NA	0	0.978902	0	0	0.0479742
sp|Q8TDP1|RNH2C_HUMAN	Ribonuclease H2 subunit C OS=Homo sapiens GN=RNASEH2C PE=1 SV=1	0.00727696	0.933098	NA	0.471441	NA	NA	0.206915	1.1008	0	0	0.0993674
sp|P63151|2ABA_HUMAN	Serine/threonine-protein phosphatase 2A 55 kDa regulatory subunit B alpha isoform OS=Homo sapiens GN=PPP2R2A PE=1 SV=1	0.00580871	0.940211	NA	0.465603	NA	NA	0.732783	1.02765	0.356236	0.188045	0.161653
sp|P10153|RNAS2_HUMAN	Non-secretory ribonuclease OS=Homo sapiens GN=RNASE2 PE=1 SV=2	0.0601006	0.941885	0.364565	0.441094	NA	NA	0.945246	1.12166	0.663093	0.646411	0.179171
sp|P10606|COX5B_HUMAN	Cytochrome c oxidase subunit 5B, mitochondrial OS=Homo sapiens GN=COX5B PE=1 SV=2	0.127376	0.942455	0.496528	0.443489	0.271353	NA	1.03611	1.39737	0.853764	0.378633	0.212753
sp|P43246|MSH2_HUMAN	DNA mismatch repair protein Msh2 OS=Homo sapiens GN=MSH2 PE=1 SV=1	0.0590124	0.942903	0.495899	0.376221	NA	NA	0.911292	1.34912	0.558085	0	0.184208
sp|P49916|DNLI3_HUMAN	DNA ligase 3 OS=Homo sapiens GN=LIG3 PE=1 SV=2	0.00425157	0.948835	NA	0.478859	NA	NA	0.692227	0.959341	0.371198	0.190904	0.17351
sp|Q14141|SEPT6_HUMAN	Septin-6 OS=Homo sapiens GN=SEPT6 PE=1 SV=4	0.0936482	0.962438	0.371441	0.382872	NA	0.414123	2.02172	1.46703	0.277572	1.21445	0.167017
sp|Q15021|CND1_HUMAN	Condensin complex subunit 1 OS=Homo sapiens GN=NCAPD2 PE=1 SV=3	0.0699752	0.975132	0.398781	0.386763	0.421157	NA	1.09452	1.10301	0.944466	0.213719	0.0684006
sp|Q99459|CDC5L_HUMAN	Cell division cycle 5-like protein OS=Homo sapiens GN=CDC5L PE=1 SV=2	0.0245933	0.975744	0.50236	0.419953	NA	NA	0.619941	0.761049	0.306099	0	0.190581
sp|O76003|GLRX3_HUMAN	Glutaredoxin-3 OS=Homo sapiens GN=GLRX3 PE=1 SV=2	0.0209647	0.979281	NA	0.467802	0.437841	NA	0.145999	0.931333	1.10988	0.144579	0.113291
sp|P62873|GBB1_HUMAN	Guanine nucleotide-binding protein G(I)/G(S)/G(T) subunit beta-1 OS=Homo sapiens GN=GNB1 PE=1 SV=3	0.0486181	0.985271	0.364226	0.493031	NA	0.481933	1.62572	1.05358	0.481262	1.1232	0.286908
sp|P68363|TBA1B_HUMAN	Tubulin alpha-1B chain OS=Homo sapiens GN=TUBA1B PE=1 SV=1	12.1241	0.000109853	0.00138298	0.00296539	0.00971074	0.000793296	0.635485	0.649153	0.721197	0.595239	0.152285
sp|P15311|EZRI_HUMAN	Ezrin OS=Homo sapiens GN=EZR PE=1 SV=4	11.614	0.000140257	0.00149903	0.0146773	0.000495868	0.00332961	0.496512	0.630378	0.447118	0.53946	0.183314
sp|P04406|G3P_HUMAN	Glyceraldehyde-3-phosphate dehydrogenase OS=Homo sapiens GN=GAPDH PE=1 SV=3	10.3547	0.000265289	0.00648936	0.000926099	0.00421488	0.00836872	0.68428	0.553609	0.653248	0.680978	0.186201
sp|P07437|TBB5_HUMAN	Tubulin beta chain OS=Homo sapiens GN=TUBB PE=1 SV=2	7.97845	0.00103532	0.00952611	0.00233863	0.0489773	0.00482682	0.755975	0.668162	0.825617	0.713294	0.130585
sp|P20674|COX5A_HUMAN	Cytochrome c oxidase subunit 5A, mitochondrial OS=Homo sapiens GN=COX5A PE=1 SV=2	7.91986	0.001074	0.0417602	0.00166511	0.00610537	0.0158436	0.521524	0.247083	0.310159	0.408728	0.185616
sp|P61289|PSME3_HUMAN	Proteasome activator complex subunit 3 OS=Homo sapiens GN=PSME3 PE=1 SV=1	13.1654	6.82119e-05	0.479981	0.0277923	0.000495868	7.82123e-05	1.01789	0.668257	0.387226	0.24742	0.170797
sp|P42167|LAP2B_HUMAN	Lamina-associated polypeptide 2, isoforms beta/gamma OS=Homo sapiens GN=TMPO PE=1 SV=2	4.25103	0.0160147	0.122108	0.027362	0.0364876	0.00949721	1.40179	0.431757	0.538074	0.332555	0.208764
sp|P49368|TCPG_HUMAN	T-complex protein 1 subunit gamma OS=Homo sapiens GN=CCT3 PE=1 SV=4	3.88888	0.0220669	0.145938	0.0439757	0.0275413	0.0112067	0.859964	0.767312	0.738867	0.686575	0.137003
sp|P08621|RU17_HUMAN	U1 small nuclear ribonucleoprotein 70 kDa OS=Homo sapiens GN=SNRNP70 PE=1 SV=2	2.88887	0.0570148	0.232147	0.0485875	0.0391839	0.0295642	0.77604	0.442669	0.427262	0.375245	0.307497
sp|P62899|RL31_HUMAN	60S ribosomal protein L31 OS=Homo sapiens GN=RPL31 PE=1 SV=1	6.44465	0.00286934	0.00737911	0.00258185	0.112056	0.0274078	0.310335	0.246842	0.619598	0.416918	0.129135
sp|Q13435|SF3B2_HUMAN	Splicing factor 3B subunit 2 OS=Homo sapiens GN=SF3B2 PE=1 SV=2	6.18653	0.00345181	0.0184816	0.0243779	0.132366	0.00149721	0.527586	0.471073	0.697254	0.21657	0.244401
sp|Q00839|HNRPU_HUMAN	Heterogeneous nuclear ribonucleoprotein U OS=Homo sapiens GN=HNRNPU PE=1 SV=6	4.44118	0.0135963	0.013617	0.0289897	0.434804	0.00827933	0.694049	0.719587	0.98048	0.633511	0.183401
sp|P09874|PARP1_HUMAN	Poly [ADP-ribose] polymerase 1 OS=Homo sapiens GN=PARP1 PE=1 SV=4	27.5901	6.26237e-07	0.00426499	0.00231993	0.00188017	0	0.663336	0.613382	0.622502	0.219053	0.177386
sp|P43243|MATR3_HUMAN	Matrin-3 OS=Homo sapiens GN=MATR3 PE=1 SV=2	22.0356	2.79058e-06	0.00148936	0.0310571	0.00386364	0	0.516805	0.699016	0.567923	0.157339	0.171568
sp|P10809|CH60_HUMAN	60 kDa heat shock protein, mitochondrial OS=Homo sapiens GN=HSPD1 PE=1 SV=2	20.0869	5.08264e-06	0.000425532	0.000121609	8.26446e-05	0.368559	0.505472	0.396296	0.394836	1.03835	0.309604
sp|P49755|TMEDA_HUMAN	Transmembrane emp24 domain-containing protein 10 OS=Homo sapiens GN=TMED10 PE=1 SV=2	12.38	9.74507e-05	0.000145068	0.00539757	0.000929752	0.0987709	0.282646	0.496239	0.399877	0.749851	0.167959
sp|P07237|PDIA1_HUMAN	Protein disulfide-isomerase OS=Homo sapiens GN=P4HB PE=1 SV=3	7.71133	0.00122541	0.00195358	0.0101684	0.00181818	0.495587	0.811641	0.84977	0.811726	0.996527	0.0701401
sp|P04908|H2A1B_HUMAN	Histone H2A type 1-B/E OS=Homo sapiens GN=HIST1H2AB PE=1 SV=2	5.92519	0.00418018	0.0153095	0.00233863	0.0199483	0.322659	0.523434	0.370244	0.535936	0.865076	0.365004
sp|P22695|QCR2_HUMAN	Cytochrome b-c1 complex subunit 2, mitochondrial OS=Homo sapiens GN=UQCRC2 PE=1 SV=3	4.55602	0.0123346	0.0421567	0.0066043	0.0223244	0.124391	0.502243	0.387505	0.413893	1.4511	0.22492
sp|P62937|PPIA_HUMAN	Peptidyl-prolyl cis-trans isomerase A OS=Homo sapiens GN=PPIA PE=1 SV=2	4.27041	0.0157475	0.00775629	0.0439196	0.0391942	0.0580894	0.735955	0.815068	0.81323	0.83002	0.121032
sp|P07737|PROF1_HUMAN	Profilin-1 OS=Homo sapiens GN=PFN1 PE=1 SV=2	3.38935	0.0350263	0.0347582	0.0116183	0.0499483	0.445564	0.612017	0.514742	0.630861	0.933981	0.298747
sp|Q14498|RBM39_HUMAN	RNA-binding protein 39 OS=Homo sapiens GN=RBM39 PE=1 SV=2	6.25407	0.00328753	0.232756	0.0135734	0.160971	0.00073743	1.15418	0.56731	0.815392	0.352958	0.0952878
sp|Q8WW12|PCNP_HUMAN	PEST proteolytic signal-containing nuclear protein OS=Homo sapiens GN=PCNP PE=1 SV=2	4.07898	0.0186219	0.288559	0.0351637	0.34936	0.00224581	0.915409	0.481324	0.888373	0.209068	0.200898
sp|Q8NC51|PAIRB_HUMAN	Plasminogen activator inhibitor 1 RNA-binding protein OS=Homo sapiens GN=SERBP1 PE=1 SV=2	2.83544	0.0601475	0.207253	0.0139383	0.464959	0.0282011	0.829795	0.571488	0.985078	0.571796	0.306182
sp|Q01081|U2AF1_HUMAN	Splicing factor U2AF 35 kDa subunit OS=Homo sapiens GN=U2AF1 PE=1 SV=3	2.72046	0.0675513	0.159449	0.0437044	0.235661	0.0145251	0.767769	0.594536	0.815051	0.472034	0.141947
sp|P16070|CD44_HUMAN	CD44 antigen OS=Homo sapiens GN=CD44 PE=1 SV=3	2.78421	0.0633298	0.304545	0.0112442	0.043626	0.230324	0.836597	0.450148	0.467214	0.753563	0.187903
sp|Q04917|1433F_HUMAN	14-3-3 protein eta OS=Homo sapiens GN=YWHAH PE=1 SV=4	3.65846	0.0272284	0.0445841	0.00850327	0.0627376	0.159564	0.630368	0.445403	0.638187	0.766918	0.190015
sp|P61204|ARF3_HUMAN	ADP-ribosylation factor 3 OS=Homo sapiens GN=ARF3 PE=1 SV=2	2.39641	0.0943659	0.0476596	0.0131057	0.377314	0.481453	0.594132	0.304347	0.877321	1.01702	0.32906
sp|P00387|NB5R3_HUMAN	NADH-cytochrome b5 reductase 3 OS=Homo sapiens GN=CYB5R3 PE=1 SV=3	2.35022	0.0990551	0.0482882	0.0352292	0.0687913	0.401028	0.574985	0.575751	0.61216	1.07588	0.17276
sp|P13995|MTDC_HUMAN	Bifunctional methylenetetrahydrofolate dehydrogenase/cyclohydrolase, mitochondrial OS=Homo sapiens GN=MTHFD2 PE=1 SV=2	2.62828	0.0742114	0.132427	0.0187652	0.0443079	0.455665	0.690024	0.462758	1.64962	1.00254	0.158526
sp|Q9Y490|TLN1_HUMAN	Talin-1 OS=Homo sapiens GN=TLN1 PE=1 SV=3	6.3729	0.00301934	0.130522	0.0352292	0.184535	0.00052514	1.10085	0.841456	1.0853	1.39608	0.0847244
sp|P09622|DLDH_HUMAN	Dihydrolipoyl dehydrogenase, mitochondrial OS=Homo sapiens GN=DLD PE=1 SV=2	2.25478	0.109567	0.241963	0.0341721	0.379029	0.0273743	0.88747	0.69173	0.950664	1.40614	0.118332
sp|O60814|H2B1K_HUMAN	Histone H2B type 1-K OS=Homo sapiens GN=HIST1H2BK PE=1 SV=3	3.44585	0.033203	0.0644681	0.00674462	0.0594421	0.418022	0.680148	0.512336	0.663649	1.04988	0.541637
sp|P61006|RAB8A_HUMAN	Ras-related protein Rab-8A OS=Homo sapiens GN=RAB8A PE=1 SV=1	3.0791	0.0472373	0.0504449	0.00550047	0.397355	0.488112	0.621202	0.361192	1.09877	0.994718	0.227178
sp|O60664|PLIN3_HUMAN	Perilipin-3 OS=Homo sapiens GN=PLIN3 PE=1 SV=3	2.46467	0.0878737	0.190967	0.0130215	0.152304	0.146235	1.20652	0.561341	1.23692	0.798449	0.155635
sp|P23528|COF1_HUMAN	Cofilin-1 OS=Homo sapiens GN=CFL1 PE=1 SV=3	2.46356	0.0879749	0.0781431	0.0175491	0.323171	0.105709	0.844426	0.753356	1.0535	1.14851	0.105298
sp|Q99714|HCD2_HUMAN	3-hydroxyacyl-CoA dehydrogenase type-2 OS=Homo sapiens GN=HSD17B10 PE=1 SV=3	2.279	0.106789	0.0717505	0.0421328	0.0776343	0.153709	0.741823	0.72042	0.747759	0.811472	0.217001
sp|A8MW06|TMSL3_HUMAN	Thymosin beta-4-like protein 3 OS=Homo sapiens GN=TMSL3 PE=2 SV=1	2.25153	0.109945	0.30617	0.0161459	0.149298	0.121363	0.884912	0.484642	1.45261	1.49509	0.450212
sp|P16104|H2AX_HUMAN	Histone H2A.x OS=Homo sapiens GN=H2AFX PE=1 SV=2	1.99054	0.145497	0.474052	0.0147895	0.330847	0.117888	0.979316	0.486112	1.16196	1.47393	0.24793
sp|P68871|HBB_HUMAN	Hemoglobin subunit beta OS=Homo sapiens GN=HBB PE=1 SV=2	1.93878	0.153919	0.470184	0.0151076	0.157469	0.26762	1.05073	0.405681	1.48074	1.26693	0.132535
sp|Q14103|HNRPD_HUMAN	Heterogeneous nuclear ribonucleoprotein D0 OS=Homo sapiens GN=HNRNPD PE=1 SV=1	1.92206	0.15675	0.057824	0.0259308	0.338822	0.328101	0.641357	0.512431	0.870214	0.863502	0.384443
sp|P62195|PRS8_HUMAN	26S protease regulatory subunit 8 OS=Homo sapiens GN=PSMC5 PE=1 SV=1	1.89076	0.162199	0.263279	0.0107109	0.414019	0.472291	0.836054	0.286277	1.13168	1.03149	0.216008
sp|P45880|VDAC2_HUMAN	Voltage-dependent anion-selective channel protein 2 OS=Homo sapiens GN=VDAC2 PE=1 SV=2	1.88425	0.163358	0.0520406	0.0419832	0.351901	0.170302	0.609739	0.518368	1.15117	1.38125	0.293514
sp|P62851|RS25_HUMAN	40S ribosomal protein S25 OS=Homo sapiens GN=RPS25 PE=1 SV=1	1.75784	0.187689	0.0987234	0.0427315	0.135764	0.237173	0.537891	0.544256	0.597599	0.747199	0.230953
sp|P49591|SYSC_HUMAN	Seryl-tRNA synthetase, cytoplasmic OS=Homo sapiens GN=SARS PE=1 SV=3	1.74675	0.189999	0.232505	0.0270907	0.223946	0.157162	1.35609	0.471329	1.3796	1.49795	0.105778
sp|Q9P0L0|VAPA_HUMAN	Vesicle-associated membrane protein-associated protein A OS=Homo sapiens GN=VAPA PE=1 SV=3	1.59721	0.224245	0.365261	0.0203929	0.280764	0.240313	1.06774	0.634918	1.11486	1.12916	0.170032
tr|D6R904|D6R904_HUMAN	Uncharacterized protein OS=Homo sapiens GN=TPM3 PE=4 SV=1	1.56437	0.232596	0.408153	0.0290084	0.332831	0.11876	1.0565	0.589646	1.10467	0.758622	0.108956
sp|P09429|HMGB1_HUMAN	High mobility group protein B1 OS=Homo sapiens GN=HMGB1 PE=1 SV=3	1.52468	0.243118	0.072118	0.037783	0.461994	0.384123	0.793741	0.723994	1.01096	1.03429	0.166535
sp|Q16891|IMMT_HUMAN	Mitochondrial inner membrane protein OS=Homo sapiens GN=IMMT PE=1 SV=1	1.4748	0.257043	0.107911	0.0402526	0.242696	0.318011	0.661241	0.639028	0.816748	1.15123	0.360794
sp|P04083|ANXA1_HUMAN	Annexin A1 OS=Homo sapiens GN=ANXA1 PE=1 SV=2	1.45907	0.261603	0.389178	0.0448269	0.248306	0.102737	1.05508	0.718643	1.13917	1.25512	0.198857
sp|O60711|LPXN_HUMAN	Leupaxin OS=Homo sapiens GN=LPXN PE=1 SV=1	1.33711	0.299864	0.258395	0.0392891	0.314793	0.171128	1.36838	0.414111	0.802908	0.556972	0.271951
sp|P35609|ACTN2_HUMAN	Alpha-actinin-2 OS=Homo sapiens GN=ACTN2 PE=1 SV=1	1.31144	0.308613	0.353056	0.0274462	0.224267	0.484782	0.885494	0.398334	0.810041	0.986098	0.155464
sp|P06702|S10A9_HUMAN	Protein S100-A9 OS=Homo sapiens GN=S100A9 PE=1 SV=1	1.12205	0.381413	0.466509	0.0292891	0.373223	0.49143	1.04983	0.481316	0.904232	1.02299	0.164431
sp|P20700|LMNB1_HUMAN	Lamin-B1 OS=Homo sapiens GN=LMNB1 PE=1 SV=2	1.07518	0.401838	0.347737	0.0373714	0.317955	0.402056	1.05267	0.783994	1.06648	0.972215	0.128904
sp|O94826|TOM70_HUMAN	Mitochondrial import receptor subunit TOM70 OS=Homo sapiens GN=TOMM70A PE=1 SV=1	1.06945	0.404405	0.341006	0.0364733	0.346188	0.359855	0.915891	0.498873	0.935291	0.890842	0.195858
sp|P16150|LEUK_HUMAN	Leukosialin OS=Homo sapiens GN=SPN PE=1 SV=1	0.94053	0.466277	0.373366	0.0474836	0.368977	0.29352	0.917557	0.533744	0.850783	0.780335	0.272979
sp|P28072|PSB6_HUMAN	Proteasome subunit beta type-6 OS=Homo sapiens GN=PSMB6 PE=1 SV=4	0.866975	0.505209	0.436905	0.0453227	0.451684	0.390737	0.908465	0.540511	0.943989	1.07808	0.199109
sp|P61026|RAB10_HUMAN	Ras-related protein Rab-10 OS=Homo sapiens GN=RAB10 PE=1 SV=1	0.846838	0.516334	0.502166	0.0453789	0.447717	0.49143	1.01244	0.616705	1.0387	1.00055	0.09002
sp|Q9Y5K5|UCHL5_HUMAN	Ubiquitin carboxyl-terminal hydrolase isozyme L5 OS=Homo sapiens GN=UCHL5 PE=1 SV=3	6.70317	0.00399948	0.00304642	0.0349111	0.0143698	NA	0.371119	0.554606	0.46847	0	0.133285
sp|Q9BVJ6|UT14A_HUMAN	U3 small nucleolar RNA-associated protein 14 homolog A OS=Homo sapiens GN=UTP14A PE=1 SV=1	8.18949	0.0114731	NA	0.00759588	NA	NA	0.170614	0.300315	0	0	0.11198
sp|O14828|SCAM3_HUMAN	Secretory carrier-associated membrane protein 3 OS=Homo sapiens GN=SCAMP3 PE=1 SV=3	4.46298	0.0188624	0.0502031	0.00887746	NA	0.0584469	0.438548	0.287493	0.222293	0.414501	0.157433
sp|Q01082|SPTB2_HUMAN	Spectrin beta chain, brain 1 OS=Homo sapiens GN=SPTBN1 PE=1 SV=2	5.21922	0.0366232	NA	0.0211225	NA	NA	0.175247	0.395985	0.181975	0.189905	0.184997
sp|P36871|PGM1_HUMAN	Phosphoglucomutase-1 OS=Homo sapiens GN=PGM1 PE=1 SV=3	4.88791	0.0422608	NA	0.0240412	NA	NA	0.267727	0.404067	0.133182	0.278615	0.121684
sp|Q12849|GRSF1_HUMAN	G-rich sequence factor 1 OS=Homo sapiens GN=GRSF1 PE=1 SV=3	4.16865	0.0583648	NA	0.0318335	NA	NA	0.204975	0.390288	0	0	0.0978832
sp|P08243|ASNS_HUMAN	Asparagine synthetase [glutamine-hydrolyzing] OS=Homo sapiens GN=ASNS PE=1 SV=4	3.21635	0.0675157	NA	0.0249205	0.107097	NA	0	0.484407	0.441754	0.189634	0.160753
sp|Q5VYK3|ECM29_HUMAN	Proteasome-associated protein ECM29 homolog OS=Homo sapiens GN=ECM29 PE=1 SV=2	3.59722	0.0764417	NA	0.0405613	NA	NA	0	0.483705	0	0	0.0983265
sp|Q9H1C4|UN93B_HUMAN	Protein unc-93 homolog B1 OS=Homo sapiens GN=UNC93B1 PE=1 SV=2	3.40367	0.0840124	NA	0.0445089	NA	NA	0	0.541711	0	0	0.0500541
sp|Q32MZ4|LRRF1_HUMAN	Leucine-rich repeat flightless-interacting protein 1 OS=Homo sapiens GN=LRRFIP1 PE=1 SV=2	2.24583	0.138763	0.253849	0.0332086	NA	NA	0.71224	0.43172	0.247517	0.0896493	0.185192
sp|O75937|DNJC8_HUMAN	DnaJ homolog subfamily C member 8 OS=Homo sapiens GN=DNAJC8 PE=1 SV=2	2.17514	0.146631	0.471354	0.0296352	NA	NA	0.959504	0.357885	0.275068	0.214265	0.139834
sp|Q14847|LASP1_HUMAN	LIM and SH3 domain protein 1 OS=Homo sapiens GN=LASP1 PE=1 SV=2	9.54624	0.000792711	0.00766925	NA	0.00369835	0.00434637	2.74091	0.10158	3.19833	3.06634	0.159306
sp|P42126|ECI1_HUMAN	Enoyl-CoA delta isomerase 1, mitochondrial OS=Homo sapiens GN=ECI1 PE=1 SV=1	7.54301	0.00239458	0.22412	NA	0.0326963	0.000648045	1.33725	0.67523	2.96567	6.32522	0.154027
sp|Q9H4M9|EHD1_HUMAN	EH domain-containing protein 1 OS=Homo sapiens GN=EHD1 PE=1 SV=2	6.57131	0.00434813	0.0342456	NA	0.015031	0.00470391	2.16186	0.484927	2.76498	3.14681	0.20255
sp|Q9NUU7|DD19A_HUMAN	ATP-dependent RNA helicase DDX19A OS=Homo sapiens GN=DDX19A PE=1 SV=1	6.65309	0.00808337	0.012234	NA	0.00845041	NA	0.346878	0.193363	0.229423	0.142236	0.191971
sp|Q9NRK6|ABCBA_HUMAN	ATP-binding cassette sub-family B member 10, mitochondrial OS=Homo sapiens GN=ABCB10 PE=1 SV=2	7.96593	0.0124387	NA	NA	NA	0.0072514	0	0.0562771	0	0.342294	0.136156
sp|Q16563|SYPL1_HUMAN	Synaptophysin-like protein 1 OS=Homo sapiens GN=SYPL1 PE=1 SV=1	4.80367	0.0146093	0.121335	NA	0.0179959	0.0103017	1.52127	0.771859	2.77148	3.00924	0.139688
sp|P38117|ETFB_HUMAN	Electron transfer flavoprotein subunit beta OS=Homo sapiens GN=ETFB PE=1 SV=3	3.03533	0.0603207	0.0955416	NA	0.0477996	0.0364804	0.528557	0.272268	1.86246	1.92598	0.148745
sp|Q9NQC3|RTN4_HUMAN	Reticulon-4 OS=Homo sapiens GN=RTN4 PE=1 SV=2	3.0114	0.0615917	0.0830174	NA	0.0596488	0.0373631	1.84416	0.504943	1.99852	2.12877	0.0985324
sp|P67812|SC11A_HUMAN	Signal peptidase complex catalytic subunit SEC11A OS=Homo sapiens GN=SEC11A PE=1 SV=1	3.33319	0.0621737	NA	NA	0.49469	0.0111508	0.816555	0.954042	1.5269	4.51144	0.149496
sp|P61019|RAB2A_HUMAN	Ras-related protein Rab-2A OS=Homo sapiens GN=RAB2A PE=1 SV=1	3.19214	0.0686865	NA	NA	0.0877893	0.0313743	0.884736	0.728992	2.05456	2.68639	0.199183
sp|Q9NXJ5|PGPI_HUMAN	Pyroglutamyl-peptidase 1 OS=Homo sapiens GN=PGPEP1 PE=1 SV=1	2.79586	0.074479	0.117137	NA	0.15064	0.0165698	0.513718	0	1.84882	2.73198	0.206084
sp|Q00341|VIGLN_HUMAN	Vigilin OS=Homo sapiens GN=HDLBP PE=1 SV=2	3.51232	0.0796588	0.0369536	NA	NA	NA	0.344141	0.272166	0.12626	0.0666482	0.123374
sp|Q9NVM6|DJC17_HUMAN	DnaJ homolog subfamily C member 17 OS=Homo sapiens GN=DNAJC17 PE=1 SV=1	3.31918	0.0875937	0.040619	NA	NA	NA	0.465938	0.0967689	0.183442	0	0.0981809
sp|P0C0S8|H2A1_HUMAN	Histone H2A type 1 OS=Homo sapiens GN=HIST1H2AG PE=1 SV=2	2.53436	0.0942825	0.0131141	NA	0.245517	0.146313	0.378236	0.183417	1.477	1.67796	0.223117
sp|A6NHL2|TBAL3_HUMAN	Tubulin alpha chain-like 3 OS=Homo sapiens GN=TUBAL3 PE=1 SV=2	2.47955	0.115948	0.0281915	NA	0.175971	NA	0.449901	0	0.591516	0.17532	0.13718
sp|Q9NQG5|RPR1B_HUMAN	Regulation of nuclear pre-mRNA domain-containing protein 1B OS=Homo sapiens GN=RPRD1B PE=1 SV=1	2.74592	0.11736	NA	NA	0.0584711	NA	0.183569	0.093392	0.455624	0.409322	0.110148
sp|P36957|ODO2_HUMAN	Dihydrolipoyllysine-residue succinyltransferase component of 2-oxoglutarate dehydrogenase complex, mitochondrial OS=Homo sapiens GN=DLST PE=1 SV=4	2.19194	0.129522	0.0679884	NA	0.355021	0.0317207	0.586779	0.321561	0.84459	2.21627	0.142584
sp|Q10567|AP1B1_HUMAN	AP-1 complex subunit beta-1 OS=Homo sapiens GN=AP1B1 PE=1 SV=2	2.55547	0.129854	0.0701354	NA	NA	NA	2.43862	0.800479	0.796057	0.788333	0.138326
sp|P17174|AATC_HUMAN	Aspartate aminotransferase, cytoplasmic OS=Homo sapiens GN=GOT1 PE=1 SV=3	2.53703	0.131147	NA	NA	NA	0.0679218	0.516934	0.7455	0.496814	3.28981	0.189095
sp|P61201|CSN2_HUMAN	COP9 signalosome complex subunit 2 OS=Homo sapiens GN=COPS2 PE=1 SV=1	2.49327	0.13428	0.0622727	NA	NA	NA	0.564753	0.266083	0.118021	0.142426	0.152824
sp|Q9H1E3|NUCKS_HUMAN	Nuclear ubiquitous casein and cyclin-dependent kinases substrate OS=Homo sapiens GN=NUCKS1 PE=1 SV=1	2.13639	0.151157	0.0472824	NA	NA	0.142313	0.379113	0.134462	0.126291	0.737207	0.224915
sp|Q15052|ARHG6_HUMAN	Rho guanine nucleotide exchange factor 6 OS=Homo sapiens GN=ARHGEF6 PE=1 SV=2	1.99652	0.177191	NA	NA	0.0874483	NA	0.326151	0.0806399	0.515102	0	0.0994631
sp|P27449|VATL_HUMAN	V-type proton ATPase 16 kDa proteolipid subunit OS=Homo sapiens GN=ATP6V0C PE=1 SV=1	1.73794	0.208076	0.160832	NA	NA	0.0751732	1.49663	0.746503	0.539715	1.96295	0.133928
sp|P63010|AP2B1_HUMAN	AP-2 complex subunit beta OS=Homo sapiens GN=AP2B1 PE=1 SV=1	1.60225	0.232708	0.320232	NA	0.0513326	NA	0.775151	0.196476	0.456906	0.403541	0.13056
sp|P28065|PSB9_HUMAN	Proteasome subunit beta type-9 OS=Homo sapiens GN=PSMB9 PE=1 SV=2	1.39525	0.255115	NA	NA	NA	0.130637	0	0	0	0.76924	0.125812
sp|P40763|STAT3_HUMAN	Signal transducer and activator of transcription 3 OS=Homo sapiens GN=STAT3 PE=1 SV=2	1.33486	0.291496	0.118985	NA	0.136715	NA	0.638574	0.12475	0.608607	0	0.137241
sp|Q969X0|RIPL2_HUMAN	RILP-like protein 2 OS=Homo sapiens GN=RILPL2 PE=1 SV=1	1.10121	0.309897	0.162814	NA	NA	NA	1.49484	0.507732	0	0	0.193068
sp|P55265|DSRAD_HUMAN	Double-stranded RNA-specific adenosine deaminase OS=Homo sapiens GN=ADAR PE=1 SV=4	1.08202	0.314011	0.148801	NA	NA	NA	0.714377	0.278822	0.244256	0.12929	0.136524
sp|Q04446|GLGB_HUMAN	1,4-alpha-glucan-branching enzyme OS=Homo sapiens GN=GBE1 PE=1 SV=2	1.03016	0.325517	NA	NA	0.158864	NA	0.315843	0.193335	0.677467	0.263857	0.173467
sp|O60518|RNBP6_HUMAN	Ran-binding protein 6 OS=Homo sapiens GN=RANBP6 PE=1 SV=2	1.0034	0.331687	NA	NA	NA	0.169341	0	0	0	1.68741	0.168293
sp|P47755|CAZA2_HUMAN	F-actin-capping protein subunit alpha-2 OS=Homo sapiens GN=CAPZA2 PE=1 SV=3	1.19888	0.342525	0.245832	NA	0.168657	0.0818994	0.673823	0.198424	0.734519	0.485709	0.169565
sp|P00540|MOS_HUMAN	Proto-oncogene serine/threonine-protein kinase mos OS=Homo sapiens GN=MOS PE=1 SV=1	0.951115	0.344233	NA	NA	NA	0.174615	0.235985	0	0.342572	0.588935	0.177253
sp|P69849|NOMO3_HUMAN	Nodal modulator 3 OS=Homo sapiens GN=NOMO3 PE=2 SV=2	0.857376	0.368498	NA	NA	NA	0.187832	0.294372	0.49962	0	1.70283	0.136275
sp|Q969T9|WBP2_HUMAN	WW domain-binding protein 2 OS=Homo sapiens GN=WBP2 PE=1 SV=1	1.1157	0.372521	0.163704	NA	0.0825207	0.298894	0.567239	0	0.481924	0.825947	0.22558
sp|O60925|PFD1_HUMAN	Prefoldin subunit 1 OS=Homo sapiens GN=PFDN1 PE=1 SV=2	0.8182	0.379387	0.199149	NA	NA	NA	1.28807	0.309211	0.103688	0.329848	0.176539
sp|Q13423|NNTM_HUMAN	NAD(P) transhydrogenase, mitochondrial OS=Homo sapiens GN=NNT PE=1 SV=3	1.09081	0.382006	0.255938	NA	0.450455	0.058067	0.707874	0.212267	1.20717	2.86539	0.276265
sp|P05204|HMGN2_HUMAN	Non-histone chromosomal protein HMG-17 OS=Homo sapiens GN=HMGN2 PE=1 SV=3	1.07865	0.386731	0.0426596	NA	0.438616	0.486883	0.520202	0.0210216	0.911434	1.05005	0.562483
sp|Q9UKA9|PTBP2_HUMAN	Polypyrimidine tract-binding protein 2 OS=Homo sapiens GN=PTBP2 PE=1 SV=1	0.792314	0.386847	NA	NA	NA	0.196682	0.344915	0	0.550113	1.3756	0.126528
sp|Q08170|SRSF4_HUMAN	Serine/arginine-rich splicing factor 4 OS=Homo sapiens GN=SRSF4 PE=1 SV=2	0.704677	0.413825	0.216296	NA	NA	NA	1.92921	0.650421	0.504261	0.728257	0.222891
sp|P61106|RAB14_HUMAN	Ras-related protein Rab-14 OS=Homo sapiens GN=RAB14 PE=1 SV=4	0.927438	0.4162	NA	NA	0.335971	0.112771	0.369834	0.500903	1.05831	1.91842	0.177344
sp|Q6UW68|TM205_HUMAN	Transmembrane protein 205 OS=Homo sapiens GN=TMEM205 PE=1 SV=1	0.876522	0.435647	NA	NA	0.455248	0.106291	0.34093	0.626075	0.909395	2.15528	0.174701
sp|Q15125|EBP_HUMAN	3-beta-hydroxysteroid-Delta(8),Delta(7)-isomerase OS=Homo sapiens GN=EBP PE=1 SV=3	0.943567	0.44328	0.393598	NA	0.190702	0.101006	1.41801	0.277993	1.52172	1.88887	0.289992
sp|Q9GZT8|NIF3L_HUMAN	NIF3-like protein 1 OS=Homo sapiens GN=NIF3L1 PE=1 SV=2	0.921944	0.453058	0.484236	NA	0.0835434	0.267821	1.07206	0.228929	2.65396	1.93934	0.18
sp|O60784|TOM1_HUMAN	Target of Myb protein 1 OS=Homo sapiens GN=TOM1 PE=1 SV=2	0.885994	0.469779	0.129101	NA	0.185806	0.235955	0.749562	0.125728	0.57895	1.43754	0.116597
sp|Q9H4A6|GOLP3_HUMAN	Golgi phosphoprotein 3 OS=Homo sapiens GN=GOLPH3 PE=1 SV=1	0.544588	0.471432	NA	NA	NA	0.238291	0.384309	0.104798	0.193554	0.633613	0.122817
sp|P14550|AK1A1_HUMAN	Alcohol dehydrogenase [NADP+] OS=Homo sapiens GN=AKR1A1 PE=1 SV=3	0.531687	0.476643	0.247505	NA	NA	NA	1.55071	0.179661	0.504434	0.346936	0.1497
sp|P55327|TPD52_HUMAN	Tumor protein D52 OS=Homo sapiens GN=TPD52 PE=1 SV=2	0.710074	0.506741	NA	NA	0.408244	0.132034	0.147098	0.540253	1.39143	2.20758	0.211675
sp|P63313|TYB10_HUMAN	Thymosin beta-10 OS=Homo sapiens GN=TMSB10 PE=1 SV=2	0.678537	0.521637	0.351035	NA	0.159194	NA	2.05813	0	1.79406	0.227039	0.265102
sp|Q9NZZ3|CHMP5_HUMAN	Charged multivesicular body protein 5 OS=Homo sapiens GN=CHMP5 PE=1 SV=1	0.669038	0.526221	NA	NA	0.20499	0.242402	0.485235	0	1.54932	1.49785	0.127468
sp|Q92804|RBP56_HUMAN	TATA-binding protein-associated factor 2N OS=Homo sapiens GN=TAF15 PE=1 SV=1	0.325445	0.576433	0.297698	NA	NA	NA	1.77975	0.90546	0	0	0.151819
sp|P61011|SRP54_HUMAN	Signal recognition particle 54 kDa protein OS=Homo sapiens GN=SRP54 PE=1 SV=1	0.275291	0.607139	NA	NA	NA	0.304782	0.206326	0	0.442559	0.722029	0.0991501
sp|P41218|MNDA_HUMAN	Myeloid cell nuclear differentiation antigen OS=Homo sapiens GN=MNDA PE=1 SV=1	0.25838	0.618307	NA	NA	NA	0.309989	0.12824	0.280462	0.620681	0.772181	0.112275
sp|P11387|TOP1_HUMAN	DNA topoisomerase 1 OS=Homo sapiens GN=TOP1 PE=1 SV=2	0.237844	0.632512	NA	NA	NA	0.317397	0	0.537104	0	0.977361	0.14493
sp|P56545|CTBP2_HUMAN	C-terminal-binding protein 2 OS=Homo sapiens GN=CTBP2 PE=1 SV=1	0.458209	0.640615	0.437631	NA	0.174514	NA	0.894616	0.231456	0.534354	0	0.221535
tr|E7EU54|E7EU54_HUMAN	Glyceraldehyde-3-phosphate dehydrogenase OS=Homo sapiens GN=GAPDH PE=3 SV=1	0.223536	0.642869	NA	NA	NA	0.32133	0	0	0	1.62962	0.196697
sp|Q96J01|THOC3_HUMAN	THO complex subunit 3 OS=Homo sapiens GN=THOC3 PE=1 SV=1	0.202961	0.658504	0.31764	NA	NA	NA	1.0402	0.394021	0	0	0.103485
sp|Q15257|PTPA_HUMAN	Serine/threonine-protein phosphatase 2A activator OS=Homo sapiens GN=PPP2R4 PE=1 SV=3	0.417588	0.665742	0.265426	NA	NA	0.272693	1.33725	0.445	0.49802	1.89201	0.160196
sp|Q92619|HMHA1_HUMAN	Minor histocompatibility protein HA-1 OS=Homo sapiens GN=HMHA1 PE=1 SV=2	0.191147	0.667922	0.322089	NA	NA	NA	0.961059	0	0.404481	0	0.150983
sp|O43592|XPOT_HUMAN	Exportin-T OS=Homo sapiens GN=XPOT PE=1 SV=2	0.163463	0.691446	0.333888	NA	NA	NA	0.821047	0.251455	0.112973	0	0.0830074
sp|P62861|RS30_HUMAN	40S ribosomal protein S30 OS=Homo sapiens GN=FAU PE=1 SV=1	0.160178	0.694389	0.335445	NA	NA	NA	0.708253	0.493821	0	0.377265	0.199115
sp|Q9H4A5|GLP3L_HUMAN	Golgi phosphoprotein 3-like OS=Homo sapiens GN=GOLPH3L PE=1 SV=1	0.370656	0.696167	0.313056	NA	0.253192	NA	0.943074	0.563457	1.42762	0	0.147306
sp|Q9BRR6|ADPGK_HUMAN	ADP-dependent glucokinase OS=Homo sapiens GN=ADPGK PE=1 SV=1	0.146124	0.707395	NA	NA	NA	0.353542	0	0	0	1.84672	0.222966
sp|Q9Y3B8|ORN_HUMAN	Oligoribonuclease, mitochondrial OS=Homo sapiens GN=REXO2 PE=1 SV=3	0.136096	0.717125	0.346441	NA	NA	NA	1.14266	0.685191	0.66243	0.688736	0.142252
sp|Q9NYL9|TMOD3_HUMAN	Tropomodulin-3 OS=Homo sapiens GN=TMOD3 PE=1 SV=1	0.326303	0.726367	0.316799	NA	NA	0.25857	0.819787	0.354813	0.251774	0.732875	0.104501
sp|P06753|TPM3_HUMAN	Tropomyosin alpha-3 chain OS=Homo sapiens GN=TPM3 PE=1 SV=1	0.396482	0.75735	0.468839	NA	0.270868	0.204078	0.900433	0	1.37956	1.72352	0.310833
sp|P61081|UBC12_HUMAN	NEDD8-conjugating enzyme Ubc12 OS=Homo sapiens GN=UBE2M PE=1 SV=1	0.0805288	0.780292	NA	NA	0.403585	NA	0.355866	0.350333	0.828732	0.24399	0.188876
sp|Q7Z4H8|KDEL2_HUMAN	KDEL motif-containing protein 2 OS=Homo sapiens GN=KDELC2 PE=1 SV=2	0.0794364	0.781746	NA	NA	NA	0.391497	0.293167	0	0.475663	0.813228	0.155205
sp|P17480|UBF1_HUMAN	Nucleolar transcription factor 1 OS=Homo sapiens GN=UBTF PE=1 SV=1	0.0713026	0.792927	0.405048	NA	NA	NA	0.998011	0.325166	0.154018	0	0.17059
tr|D2K8Q1|D2K8Q1_HUMAN	AAA domain containing 3A protein OS=Homo sapiens GN=ATAD3A PE=2 SV=1	0.222306	0.803149	0.25853	NA	0.427283	NA	0.729061	0.159446	1.243	0.49195	0.206804
sp|O95466|FMNL_HUMAN	Formin-like protein 1 OS=Homo sapiens GN=FMNL1 PE=1 SV=3	0.056192	0.815686	0.416054	NA	NA	NA	0.885897	0.525654	0.681558	0	0.12982
sp|Q13564|ULA1_HUMAN	NEDD8-activating enzyme E1 regulatory subunit OS=Homo sapiens GN=NAE1 PE=1 SV=1	0.0505491	0.825012	NA	NA	NA	0.413486	0.481807	0.127573	0.248055	1.13754	0.179468
sp|Q93009|UBP7_HUMAN	Ubiquitin carboxyl-terminal hydrolase 7 OS=Homo sapiens GN=USP7 PE=1 SV=2	0.184822	0.833036	0.447959	NA	0.276147	NA	0.832306	0.30468	0.548457	0.282068	0.267893
sp|O75436|VP26A_HUMAN	Vacuolar protein sorting-associated protein 26A OS=Homo sapiens GN=VPS26A PE=1 SV=2	0.174393	0.841573	NA	NA	0.278089	0.460816	0.608928	0	0.782892	0.846788	0.147944
sp|Q9BT43|RPC7L_HUMAN	DNA-directed RNA polymerase III subunit RPC7-like OS=Homo sapiens GN=POLR3GL PE=2 SV=1	0.27436	0.842995	0.358462	NA	0.326178	0.254223	0.742503	0.382028	1.02131	1.16376	0.18368
sp|Q13951|PEBB_HUMAN	Core-binding factor subunit beta OS=Homo sapiens GN=CBFB PE=1 SV=2	0.171917	0.843614	0.352224	NA	0.335165	NA	1.25944	0	1.36859	0	0.119522
sp|P27694|RFA1_HUMAN	Replication protein A 70 kDa DNA-binding subunit OS=Homo sapiens GN=RPA1 PE=1 SV=2	0.168324	0.846586	0.343714	NA	0.325227	NA	1.06115	0.223865	0.985194	0.345353	0.204453
sp|P53582|AMPM1_HUMAN	Methionine aminopeptidase 1 OS=Homo sapiens GN=METAP1 PE=1 SV=2	0.0290877	0.866757	0.441625	NA	NA	NA	1.04554	0.250757	0	0	0.0928382
sp|Q15437|SC23B_HUMAN	Protein transport protein Sec23B OS=Homo sapiens GN=SEC23B PE=1 SV=2	0.22097	0.880382	0.274903	NA	0.317955	0.406637	1.18678	0.185393	2.52688	1.89211	0.27898
sp|P14678|RSMB_HUMAN	Small nuclear ribonucleoprotein-associated proteins B and B' OS=Homo sapiens GN=SNRPB PE=1 SV=2	0.0219861	0.884013	0.430145	NA	NA	NA	0.918084	0.607624	0	0	0.10836
sp|O75347|TBCA_HUMAN	Tubulin-specific chaperone A OS=Homo sapiens GN=TBCA PE=1 SV=3	0.0897703	0.914607	NA	NA	0.34907	0.421587	0.442068	0.180401	0.92383	1.16162	0.243605
sp|Q9Y2S6|CCD72_HUMAN	Coiled-coil domain-containing protein 72 OS=Homo sapiens GN=CCDC72 PE=1 SV=1	0.0078991	0.930304	NA	NA	0.477738	NA	0.225088	0.127343	1.08941	0.12415	0.181703
sp|Q8WWM7|ATX2L_HUMAN	Ataxin-2-like protein OS=Homo sapiens GN=ATXN2L PE=1 SV=2	0.00592334	0.939626	0.478414	NA	NA	NA	1.03003	0	0.199156	0	0.0921011
sp|P46779|RL28_HUMAN	60S ribosomal protein L28 OS=Homo sapiens GN=RPL28 PE=1 SV=3	0.0504589	0.950947	0.442534	NA	0.386932	NA	1.17409	0	0.73503	0.374808	0.221009
sp|P20701|ITAL_HUMAN	Integrin alpha-L OS=Homo sapiens GN=ITGAL PE=1 SV=3	0.0031008	0.956296	NA	NA	NA	0.476447	0.436677	0.159169	0.152094	1.04173	0.119692
sp|Q99436|PSB7_HUMAN	Proteasome subunit beta type-7 OS=Homo sapiens GN=PSMB7 PE=1 SV=1	0.0310352	0.969501	0.473008	NA	NA	0.408961	1.04848	0.368342	0.336496	0.839333	0.277841
sp|Q13242|SRSF9_HUMAN	Serine/arginine-rich splicing factor 9 OS=Homo sapiens GN=SRSF9 PE=1 SV=1	0.0014861	0.969735	NA	NA	0.496963	NA	0.500241	0.517675	0.976642	0.327163	0.099805

## Sheet: Yes-set 3h ( all DEPs)
ID	annotation	F.stat	p.value	pvals.0h.3h	ER.3h.0h	CV
P62899	60S ribosomal protein L31 OS=Homo sapiens GN=RPL31 PE=1 SV=1	6.44465	0.00286934	0.00258185	0.246842	0.129135
P20674	Cytochrome c oxidase subunit 5A, mitochondrial OS=Homo sapiens GN=COX5A PE=1 SV=2	7.91986	0.001074	0.00166511	0.247083	0.185616
P62195	26S protease regulatory subunit 8 OS=Homo sapiens GN=PSMC5 PE=1 SV=1	1.89076	0.162199	0.0107109	0.286277	0.216008
O14828	Secretory carrier-associated membrane protein 3 OS=Homo sapiens GN=SCAMP3 PE=1 SV=3	4.46298	0.0188624	0.00887746	0.287493	0.157433
Q9BVJ6	U3 small nucleolar RNA-associated protein 14 homolog A OS=Homo sapiens GN=UTP14A PE=1 SV=1	8.18949	0.0114731	0.00759588	0.300315	0.11198
O75937	DnaJ homolog subfamily C member 8 OS=Homo sapiens GN=DNAJC8 PE=1 SV=2	2.17514	0.146631	0.0296352	0.357885	0.139834
P61006	Ras-related protein Rab-8A OS=Homo sapiens GN=RAB8A PE=1 SV=1	3.0791	0.0472373	0.00550047	0.361192	0.227178
P22695	Cytochrome b-c1 complex subunit 2, mitochondrial OS=Homo sapiens GN=UQCRC2 PE=1 SV=3	4.55602	0.0123346	0.0066043	0.387505	0.22492
Q12849	G-rich sequence factor 1 OS=Homo sapiens GN=GRSF1 PE=1 SV=3	4.16865	0.0583648	0.0318335	0.390288	0.0978832
Q01082	Spectrin beta chain, brain 1 OS=Homo sapiens GN=SPTBN1 PE=1 SV=2	5.21922	0.0366232	0.0211225	0.395985	0.184997
P35609	Alpha-actinin-2 OS=Homo sapiens GN=ACTN2 PE=1 SV=1	1.31144	0.308613	0.0274462	0.398334	0.155464
P36871	Phosphoglucomutase-1 OS=Homo sapiens GN=PGM1 PE=1 SV=3	4.88791	0.0422608	0.0240412	0.404067	0.121684
P68871	Hemoglobin subunit beta OS=Homo sapiens GN=HBB PE=1 SV=2	1.93878	0.153919	0.0151076	0.405681	0.132535
O60711	Leupaxin OS=Homo sapiens GN=LPXN PE=1 SV=1	1.33711	0.299864	0.0392891	0.414111	0.271951
Q32MZ4	Leucine-rich repeat flightless-interacting protein 1 OS=Homo sapiens GN=LRRFIP1 PE=1 SV=2	2.24583	0.138763	0.0332086	0.43172	0.185192
P42167	Lamina-associated polypeptide 2, isoforms beta/gamma OS=Homo sapiens GN=TMPO PE=1 SV=2	4.25103	0.0160147	0.027362	0.431757	0.208764
Q04917	14-3-3 protein eta OS=Homo sapiens GN=YWHAH PE=1 SV=4	3.65846	0.0272284	0.00850327	0.445403	0.190015
P16070	CD44 antigen OS=Homo sapiens GN=CD44 PE=1 SV=3	2.78421	0.0633298	0.0112442	0.450148	0.187903
P13995	Bifunctional methylenetetrahydrofolate dehydrogenase/cyclohydrolase, mitochondrial OS=Homo sapiens GN=MTHFD2 PE=1 SV=2	2.62828	0.0742114	0.0187652	0.462758	0.158526
Q13435	Splicing factor 3B subunit 2 OS=Homo sapiens GN=SF3B2 PE=1 SV=2	6.18653	0.00345181	0.0243779	0.471073	0.244401
P49591	Seryl-tRNA synthetase, cytoplasmic OS=Homo sapiens GN=SARS PE=1 SV=3	1.74675	0.189999	0.0270907	0.471329	0.105778
P06702	Protein S100-A9 OS=Homo sapiens GN=S100A9 PE=1 SV=1	1.12205	0.381413	0.0292891	0.481316	0.164431
Q8WW12	PEST proteolytic signal-containing nuclear protein OS=Homo sapiens GN=PCNP PE=1 SV=2	4.07898	0.0186219	0.0351637	0.481324	0.200898
Q5VYK3	Proteasome-associated protein ECM29 homolog OS=Homo sapiens GN=ECM29 PE=1 SV=2	3.59722	0.0764417	0.0405613	0.483705	0.0983265
P08243	Asparagine synthetase [glutamine-hydrolyzing] OS=Homo sapiens GN=ASNS PE=1 SV=4	3.21635	0.0675157	0.0249205	0.484407	0.160753
P16104	Histone H2A.x OS=Homo sapiens GN=H2AFX PE=1 SV=2	1.99054	0.145497	0.0147895	0.486112	0.24793
P49755	Transmembrane emp24 domain-containing protein 10 OS=Homo sapiens GN=TMED10 PE=1 SV=2	12.38	9.74507e-05	0.00539757	0.496239	0.167959
O94826	Mitochondrial import receptor subunit TOM70 OS=Homo sapiens GN=TOMM70A PE=1 SV=1	1.06945	0.404405	0.0364733	0.498873	0.195858
P07737	Profilin-1 OS=Homo sapiens GN=PFN1 PE=1 SV=2	3.38935	0.0350263	0.0116183	0.514742	0.298747
P45880	Voltage-dependent anion-selective channel protein 2 OS=Homo sapiens GN=VDAC2 PE=1 SV=2	1.88425	0.163358	0.0419832	0.518368	0.293514
P16150	Leukosialin OS=Homo sapiens GN=SPN PE=1 SV=1	0.94053	0.466277	0.0474836	0.533744	0.272979
P28072	Proteasome subunit beta type-6 OS=Homo sapiens GN=PSMB6 PE=1 SV=4	0.866975	0.505209	0.0453227	0.540511	0.199109
Q9H1C4	Protein unc-93 homolog B1 OS=Homo sapiens GN=UNC93B1 PE=1 SV=2	3.40367	0.0840124	0.0445089	0.541711	0.0500541
P62851	40S ribosomal protein S25 OS=Homo sapiens GN=RPS25 PE=1 SV=1	1.75784	0.187689	0.0427315	0.544256	0.230953
P04406	Glyceraldehyde-3-phosphate dehydrogenase OS=Homo sapiens GN=GAPDH PE=1 SV=3	10.3547	0.000265289	0.000926099	0.553609	0.186201
Q9Y5K5	Ubiquitin carboxyl-terminal hydrolase isozyme L5 OS=Homo sapiens GN=UCHL5 PE=1 SV=3	6.70317	0.00399948	0.0349111	0.554606	0.133285
O60664	Perilipin-3 OS=Homo sapiens GN=PLIN3 PE=1 SV=3	2.46467	0.0878737	0.0130215	0.561341	0.155635
Q14498	RNA-binding protein 39 OS=Homo sapiens GN=RBM39 PE=1 SV=2	6.25407	0.00328753	0.0135734	0.56731	0.0952878
P00387	NADH-cytochrome b5 reductase 3 OS=Homo sapiens GN=CYB5R3 PE=1 SV=3	2.35022	0.0990551	0.0352292	0.575751	0.17276
D6R904	Uncharacterized protein OS=Homo sapiens GN=TPM3 PE=4 SV=1	1.56437	0.232596	0.0290084	0.589646	0.108956
Q01081	Splicing factor U2AF 35 kDa subunit OS=Homo sapiens GN=U2AF1 PE=1 SV=3	2.72046	0.0675513	0.0437044	0.594536	0.141947
P09874	Poly [ADP-ribose] polymerase 1 OS=Homo sapiens GN=PARP1 PE=1 SV=4	27.5901	6.26237e-07	0.00231993	0.613382	0.177386
P61026	Ras-related protein Rab-10 OS=Homo sapiens GN=RAB10 PE=1 SV=1	0.846838	0.516334	0.0453789	0.616705	0.09002
P15311	Ezrin OS=Homo sapiens GN=EZR PE=1 SV=4	11.614	0.000140257	0.0146773	0.630378	0.183314
Q9P0L0	Vesicle-associated membrane protein-associated protein A OS=Homo sapiens GN=VAPA PE=1 SV=3	1.59721	0.224245	0.0203929	0.634918	0.170032
P68363	Tubulin alpha-1B chain OS=Homo sapiens GN=TUBA1B PE=1 SV=1	12.1241	0.000109853	0.00296539	0.649153	0.152285
P07437	Tubulin beta chain OS=Homo sapiens GN=TUBB PE=1 SV=2	7.97845	0.00103532	0.00233863	0.668162	0.130585
P61289	Proteasome activator complex subunit 3 OS=Homo sapiens GN=PSME3 PE=1 SV=1	13.1654	6.82119e-05	0.0277923	0.668257	0.170797
P68104	Elongation factor 1-alpha 1 OS=Homo sapiens GN=EEF1A1 PE=1 SV=1	1.69616	0.200925	0.0163517	1.52267	0.191643
Q8WUM4	Programmed cell death 6-interacting protein OS=Homo sapiens GN=PDCD6IP PE=1 SV=1	6.0154	0.0039109	0.0111506	1.53547	0.108178
P38159	Heterogeneous nuclear ribonucleoprotein G OS=Homo sapiens GN=RBMX PE=1 SV=3	2.81028	0.0616883	0.0430122	1.53595	0.170577
Q9Y265	RuvB-like 1 OS=Homo sapiens GN=RUVBL1 PE=1 SV=1	2.42727	0.0913682	0.0183162	1.55067	0.147822
P17987	T-complex protein 1 subunit alpha OS=Homo sapiens GN=TCP1 PE=1 SV=1	1.83242	0.172902	0.0136389	1.55528	0.158472
Q96KP4	Cytosolic non-specific dipeptidase OS=Homo sapiens GN=CNDP2 PE=1 SV=2	12.5787	8.89069e-05	0.0176052	1.5558	0.161037
Q15181	Inorganic pyrophosphatase OS=Homo sapiens GN=PPA1 PE=1 SV=2	3.17038	0.0432155	0.0173152	1.57004	0.188885
O43776	Asparaginyl-tRNA synthetase, cytoplasmic OS=Homo sapiens GN=NARS PE=1 SV=1	8.80852	0.000626474	0.00597755	1.57228	0.100546
P27708	CAD protein OS=Homo sapiens GN=CAD PE=1 SV=3	10.0496	0.000312059	0.0165575	1.57858	0.102268
O00567	Nucleolar protein 56 OS=Homo sapiens GN=NOP56 PE=1 SV=4	6.31895	0.00313793	0.037652	1.61808	0.23305
O14980	Exportin-1 OS=Homo sapiens GN=XPO1 PE=1 SV=1	1.32515	0.30391	0.0492329	1.62826	0.235152
P46777	60S ribosomal protein L5 OS=Homo sapiens GN=RPL5 PE=1 SV=3	9.05012	0.000544356	0.00579046	1.64742	0.11148
P32969	60S ribosomal protein L9 OS=Homo sapiens GN=RPL9 PE=1 SV=1	1.67761	0.205096	0.047942	1.65245	0.173909
Q8TEX9	Importin-4 OS=Homo sapiens GN=IPO4 PE=1 SV=2	11.9152	0.000121302	0.00644528	1.65755	0.171203
P62942	Peptidyl-prolyl cis-trans isomerase FKBP1A OS=Homo sapiens GN=FKBP1A PE=1 SV=2	5.1675	0.00747707	0.038391	1.7103	0.158348
Q12905	Interleukin enhancer-binding factor 2 OS=Homo sapiens GN=ILF2 PE=1 SV=2	3.12052	0.0453634	0.014724	1.72316	0.183823
Q96C90	Protein phosphatase 1 regulatory subunit 14B OS=Homo sapiens GN=PPP1R14B PE=1 SV=3	1.74954	0.189414	0.037652	1.72366	0.167381
P08865	40S ribosomal protein SA OS=Homo sapiens GN=RPSA PE=1 SV=4	3.20321	0.041863	0.00895229	1.72821	0.186516
P04040	Catalase OS=Homo sapiens GN=CAT PE=1 SV=3	4.09542	0.0183535	0.0198223	1.7285	0.24118
P55263	Adenosine kinase OS=Homo sapiens GN=ADK PE=1 SV=2	1.40819	0.276923	0.0498971	1.73039	0.21221
P68402	Platelet-activating factor acetylhydrolase IB subunit beta OS=Homo sapiens GN=PAFAH1B2 PE=1 SV=1	3.14516	0.0442875	0.0380449	1.7381	0.174749
P61619	Protein transport protein Sec61 subunit alpha isoform 1 OS=Homo sapiens GN=SEC61A1 PE=1 SV=2	6.79075	0.00225386	0.0344808	1.74203	0.142531
Q92608	Dedicator of cytokinesis protein 2 OS=Homo sapiens GN=DOCK2 PE=1 SV=2	1.81116	0.186503	0.0412067	1.74411	0.161903
Q9BV40	Vesicle-associated membrane protein 8 OS=Homo sapiens GN=VAMP8 PE=1 SV=1	4.90723	0.00921928	0.0077362	1.76379	0.116407
P80303	Nucleobindin-2 OS=Homo sapiens GN=NUCB2 PE=1 SV=2	2.02206	0.140611	0.0182601	1.76429	0.131278
Q16181	Septin-7 OS=Homo sapiens GN=SEPT7 PE=1 SV=2	1.94368	0.1531	0.0262021	1.76857	0.173038
P02786	Transferrin receptor protein 1 OS=Homo sapiens GN=TFRC PE=1 SV=2	16.4686	1.77567e-05	0.00688494	1.78746	0.21475
P55957	BH3-interacting domain death agonist OS=Homo sapiens GN=BID PE=1 SV=1	2.30498	0.103894	0.0110009	1.79902	0.176571
P17858	6-phosphofructokinase, liver type OS=Homo sapiens GN=PFKL PE=1 SV=6	1.78533	0.182089	0.0224322	1.84538	0.182765
P78527	DNA-dependent protein kinase catalytic subunit OS=Homo sapiens GN=PRKDC PE=1 SV=3	14.5408	3.78707e-05	0.00901777	1.8505	0.29326
Q96HE7	ERO1-like protein alpha OS=Homo sapiens GN=ERO1L PE=1 SV=2	6.19297	0.00343577	0.042928	1.86102	0.175306
Q7L2H7	Eukaryotic translation initiation factor 3 subunit M OS=Homo sapiens GN=EIF3M PE=1 SV=1	1.22066	0.34163	0.0480449	1.86814	0.225913
P62995	Transformer-2 protein homolog beta OS=Homo sapiens GN=TRA2B PE=1 SV=1	3.2467	0.0401423	0.0459588	1.88451	0.193546
Q15363	Transmembrane emp24 domain-containing protein 2 OS=Homo sapiens GN=TMED2 PE=1 SV=1	4.43695	0.0136454	0.0271188	1.89669	0.159508
P29692	Elongation factor 1-delta OS=Homo sapiens GN=EEF1D PE=1 SV=5	16.1025	2.0392e-05	0.00500468	1.90539	0.12711
Q07021	Complement component 1 Q subcomponent-binding protein, mitochondrial OS=Homo sapiens GN=C1QBP PE=1 SV=1	2.1038	0.128743	0.0278952	1.91467	0.198204
P51858	Hepatoma-derived growth factor OS=Homo sapiens GN=HDGF PE=1 SV=1	2.90308	0.0562122	0.0165201	1.926	0.185046
P26639	Threonyl-tRNA synthetase, cytoplasmic OS=Homo sapiens GN=TARS PE=1 SV=3	5.62475	0.00523875	0.0437325	1.93298	0.231438
Q9BTT0	Acidic leucine-rich nuclear phosphoprotein 32 family member E OS=Homo sapiens GN=ANP32E PE=1 SV=1	5.9004	0.0042578	0.015276	1.95133	0.21723
O14818	Proteasome subunit alpha type-7 OS=Homo sapiens GN=PSMA7 PE=1 SV=1	6.52754	0.00270636	0.00736202	2.03021	0.180515
Q9Y5M8	Signal recognition particle receptor subunit beta OS=Homo sapiens GN=SRPRB PE=1 SV=3	7.98593	0.0010305	0.00434051	2.05392	0.129191
P49915	GMP synthase [glutamine-hydrolyzing] OS=Homo sapiens GN=GMPS PE=1 SV=1	4.29068	0.0215292	0.0129747	2.06097	0.209302
B1AK87	Capping protein (Actin filament) muscle Z-line, beta OS=Homo sapiens GN=CAPZB PE=4 SV=1	2.60218	0.0762255	0.0347521	2.06161	0.17752
P53634	Dipeptidyl peptidase 1 OS=Homo sapiens GN=CTSC PE=1 SV=2	5.71595	0.00488862	0.0136483	2.06712	0.227727
P53618	Coatomer subunit beta OS=Homo sapiens GN=COPB1 PE=1 SV=3	4.56994	0.0121908	0.0153227	2.09259	0.14867
Q9Y2X3	Nucleolar protein 58 OS=Homo sapiens GN=NOP58 PE=1 SV=1	3.06332	0.0479738	0.00872778	2.1223	0.220549
O14979	Heterogeneous nuclear ribonucleoprotein D-like OS=Homo sapiens GN=HNRPDL PE=1 SV=3	2.46191	0.0881268	0.0382881	2.14571	0.197561
Q9Y266	Nuclear migration protein nudC OS=Homo sapiens GN=NUDC PE=1 SV=1	6.27732	0.00323302	0.0105051	2.22072	0.219234
P54727	UV excision repair protein RAD23 homolog B OS=Homo sapiens GN=RAD23B PE=1 SV=1	2.83352	0.0602636	0.00997194	2.25722	0.227856
P54578	Ubiquitin carboxyl-terminal hydrolase 14 OS=Homo sapiens GN=USP14 PE=1 SV=3	4.77988	0.010234	0.00735267	2.26178	0.172482
O14950	Myosin regulatory light chain 12B OS=Homo sapiens GN=MYL12B PE=1 SV=2	6.57029	0.00262638	0.011609	2.29982	0.214615
Q9NVP1	ATP-dependent RNA helicase DDX18 OS=Homo sapiens GN=DDX18 PE=1 SV=2	7.78856	0.00447394	0.010159	2.33655	0.15952
O43447	Peptidyl-prolyl cis-trans isomerase H OS=Homo sapiens GN=PPIH PE=1 SV=1	2.72946	0.079031	0.0324977	2.35506	0.147591
Q96BM9	ADP-ribosylation factor-like protein 8A OS=Homo sapiens GN=ARL8A PE=1 SV=1	1.692	0.201854	0.038232	2.36028	0.15931
Q9BZZ5	Apoptosis inhibitor 5 OS=Homo sapiens GN=API5 PE=1 SV=2	3.92046	0.0655184	0.0390645	2.39691	0.13547
Q9Y295	Developmentally-regulated GTP-binding protein 1 OS=Homo sapiens GN=DRG1 PE=1 SV=1	5.19471	0.037009	0.0236483	2.50482	0.0890012
P49756	RNA-binding protein 25 OS=Homo sapiens GN=RBM25 PE=1 SV=3	1.59005	0.231669	0.031899	2.54949	0.102403
Q96AG4	Leucine-rich repeat-containing protein 59 OS=Homo sapiens GN=LRRC59 PE=1 SV=1	18.8163	7.71271e-06	0.00594013	2.55025	0.167037
P62158	Calmodulin OS=Homo sapiens GN=CALM1 PE=1 SV=2	2.37077	0.0969389	0.0198223	2.6233	0.289265
Q14157	Ubiquitin-associated protein 2-like OS=Homo sapiens GN=UBAP2L PE=1 SV=2	4.20252	0.023055	0.0113471	2.66489	0.113273
O75844	CAAX prenyl protease 1 homolog OS=Homo sapiens GN=ZMPSTE24 PE=1 SV=2	3.36336	0.0359018	0.0458746	2.74173	0.285844
P00918	Carbonic anhydrase 2 OS=Homo sapiens GN=CA2 PE=1 SV=2	2.61839	0.104412	0.0354069	2.76718	0.162302
Q9H2U2	Inorganic pyrophosphatase 2, mitochondrial OS=Homo sapiens GN=PPA2 PE=1 SV=2	4.88373	0.00939775	0.016492	2.8874	0.26854
P35268	60S ribosomal protein L22 OS=Homo sapiens GN=RPL22 PE=1 SV=2	2.19914	0.128646	0.0414125	2.90719	0.167168
P84098	60S ribosomal protein L19 OS=Homo sapiens GN=RPL19 PE=1 SV=1	3.42663	0.058243	0.0157624	3.00681	0.188835
P12814	Alpha-actinin-1 OS=Homo sapiens GN=ACTN1 PE=1 SV=2	3.72571	0.0337186	0.0110477	3.27387	0.115308
Q9NX58	Cell growth-regulating nucleolar protein OS=Homo sapiens GN=LYAR PE=1 SV=2	6.81602	0.0191441	0.0135173	3.40831	0.165179
Q92621	Nuclear pore complex protein Nup205 OS=Homo sapiens GN=NUP205 PE=1 SV=3	9.56207	0.00712178	0.00644528	3.75146	0.126126
O95831	Apoptosis-inducing factor 1, mitochondrial OS=Homo sapiens GN=AIFM1 PE=1 SV=1	5.25919	0.00695372	0.0297474	3.84524	0.256691
P21964	Catechol O-methyltransferase OS=Homo sapiens GN=COMT PE=1 SV=2	2.48272	0.115668	0.0288868	4.35857	0.234433
Q9UBT2	SUMO-activating enzyme subunit 2 OS=Homo sapiens GN=UBA2 PE=1 SV=2	4.36419	0.0311186	0.0131431	4.86564	0.268902
P49721	Proteasome subunit beta type-2 OS=Homo sapiens GN=PSMB2 PE=1 SV=1	20.6204	4.2935e-06	0.000617399	5.19509	0.138081
Q13347	Eukaryotic translation initiation factor 3 subunit I OS=Homo sapiens GN=EIF3I PE=1 SV=1	10.6008	0.000468593	0.000879326	5.25155	0.146637
Q9GZT3	SRA stem-loop-interacting RNA-binding protein, mitochondrial OS=Homo sapiens GN=SLIRP PE=1 SV=1	7.55351	0.00135601	0.00336763	5.68907	0.173402

## Sheet: Yes-set 24h (all DEPs)
ID	annotation	F.stat	p.value	pvals.0h.24h	ER.24h.0h	CV
P13727	Bone marrow proteoglycan OS=Homo sapiens GN=PRG2 PE=1 SV=2	13.5427	0.000382761	6.76983e-05	0.107409	0.217578
P11678	Eosinophil peroxidase OS=Homo sapiens GN=EPX PE=1 SV=2	21.837	2.92653e-05	9.67118e-06	0.139704	0.206561
P53007	Tricarboxylate transport protein, mitochondrial OS=Homo sapiens GN=SLC25A1 PE=1 SV=2	5.42891	0.00932087	0.00117021	0.203523	0.134917
P06737	Glycogen phosphorylase, liver form OS=Homo sapiens GN=PYGL PE=1 SV=4	4.95485	0.00886922	0.000357834	0.206609	0.175837
Q9BQG0	Myb-binding protein 1A OS=Homo sapiens GN=MYBBP1A PE=1 SV=2	6.37345	0.00941781	0.0015087	0.208418	0.233071
P78347	General transcription factor II-I OS=Homo sapiens GN=GTF2I PE=1 SV=2	5.13308	0.0192726	0.00346228	0.224946	0.275936
O75369	Filamin-B OS=Homo sapiens GN=FLNB PE=1 SV=2	6.01011	0.0115384	0.00178917	0.225742	0.141218
P41252	Isoleucyl-tRNA synthetase, cytoplasmic OS=Homo sapiens GN=IARS PE=1 SV=2	2.77851	0.0636952	0.00368472	0.272104	0.296636
P50416	Carnitine O-palmitoyltransferase 1, liver isoform OS=Homo sapiens GN=CPT1A PE=1 SV=2	2.77515	0.0639119	0.0187718	0.279608	0.215107
P49755	Transmembrane emp24 domain-containing protein 10 OS=Homo sapiens GN=TMED10 PE=1 SV=2	12.38	9.74507e-05	0.000145068	0.282646	0.167959
P62899	60S ribosomal protein L31 OS=Homo sapiens GN=RPL31 PE=1 SV=1	6.44465	0.00286934	0.00737911	0.310335	0.129135
Q9NVP1	ATP-dependent RNA helicase DDX18 OS=Homo sapiens GN=DDX18 PE=1 SV=2	7.78856	0.00447394	0.00640232	0.315982	0.15952
Q00341	Vigilin OS=Homo sapiens GN=HDLBP PE=1 SV=2	3.51232	0.0796588	0.0369536	0.344141	0.123374
Q9NUU7	ATP-dependent RNA helicase DDX19A OS=Homo sapiens GN=DDX19A PE=1 SV=1	6.65309	0.00808337	0.012234	0.346878	0.191971
O76094	Signal recognition particle 72 kDa protein OS=Homo sapiens GN=SRP72 PE=1 SV=3	5.13887	0.00764942	0.0277176	0.347292	0.191836
P62424	60S ribosomal protein L7a OS=Homo sapiens GN=RPL7A PE=1 SV=2	0.981414	0.445787	0.03206	0.350771	0.229153
P57737	Coronin-7 OS=Homo sapiens GN=CORO7 PE=1 SV=2	1.77571	0.193056	0.0344391	0.351567	0.238958
Q7Z5K2	Wings apart-like protein homolog OS=Homo sapiens GN=WAPAL PE=1 SV=1	3.42822	0.0431208	0.0139265	0.365492	0.165221
Q96EL3	39S ribosomal protein L53, mitochondrial OS=Homo sapiens GN=MRPL53 PE=1 SV=1	2.27384	0.107375	0.0239555	0.366669	0.186543
Q9Y5K5	Ubiquitin carboxyl-terminal hydrolase isozyme L5 OS=Homo sapiens GN=UCHL5 PE=1 SV=3	6.70317	0.00399948	0.00304642	0.371119	0.133285
Q8NCW5	Apolipoprotein A-I-binding protein OS=Homo sapiens GN=APOA1BP PE=1 SV=2	3.63014	0.0364635	0.0273308	0.375866	0.15154
O60341	Lysine-specific histone demethylase 1A OS=Homo sapiens GN=KDM1A PE=1 SV=2	3.50542	0.0551456	0.0139072	0.377293	0.130693
P0C0S8	Histone H2A type 1 OS=Homo sapiens GN=HIST1H2AG PE=1 SV=2	2.53436	0.0942825	0.0131141	0.378236	0.223117
Q9H1E3	Nuclear ubiquitous casein and cyclin-dependent kinases substrate OS=Homo sapiens GN=NUCKS1 PE=1 SV=1	2.13639	0.151157	0.0472824	0.379113	0.224915
P63279	SUMO-conjugating enzyme UBC9 OS=Homo sapiens GN=UBE2I PE=1 SV=1	3.26407	0.0394772	0.012118	0.38147	0.17677
P48444	Coatomer subunit delta OS=Homo sapiens GN=ARCN1 PE=1 SV=1	1.78157	0.182843	0.0106867	0.409284	0.137168
Q9NYF8	Bcl-2-associated transcription factor 1 OS=Homo sapiens GN=BCLAF1 PE=1 SV=2	5.02954	0.00834966	0.0418375	0.419856	0.238786
P13929	Beta-enolase OS=Homo sapiens GN=ENO3 PE=1 SV=4	1.72113	0.195451	0.019294	0.422209	0.212065
Q9Y2Q3	Glutathione S-transferase kappa 1 OS=Homo sapiens GN=GSTK1 PE=1 SV=3	1.90896	0.159007	0.00902321	0.424152	0.241867
Q9Y6E2	Basic leucine zipper and W2 domain-containing protein 2 OS=Homo sapiens GN=BZW2 PE=1 SV=1	3.87544	0.0298697	0.0221663	0.428732	0.225215
P21796	Voltage-dependent anion-selective channel protein 1 OS=Homo sapiens GN=VDAC1 PE=1 SV=2	2.67574	0.0706968	0.0108317	0.433991	0.216697
P10155	60 kDa SS-A/Ro ribonucleoprotein OS=Homo sapiens GN=TROVE2 PE=1 SV=2	1.12726	0.3792	0.0494487	0.436409	0.207918
Q9P2J5	Leucyl-tRNA synthetase, cytoplasmic OS=Homo sapiens GN=LARS PE=1 SV=2	6.75984	0.00230232	0.00775629	0.437728	0.28031
P25098	Beta-adrenergic receptor kinase 1 OS=Homo sapiens GN=ADRBK1 PE=1 SV=2	4.34134	0.0207037	0.0346518	0.444709	0.167426
A6NHL2	Tubulin alpha chain-like 3 OS=Homo sapiens GN=TUBAL3 PE=1 SV=2	2.47955	0.115948	0.0281915	0.449901	0.13718
Q96PZ0	Pseudouridylate synthase 7 homolog OS=Homo sapiens GN=PUS7 PE=1 SV=2	2.05817	0.16078	0.0276692	0.450771	0.126552
Q16531	DNA damage-binding protein 1 OS=Homo sapiens GN=DDB1 PE=1 SV=1	2.1111	0.127737	0.0401547	0.461664	0.223695
Q9H583	HEAT repeat-containing protein 1 OS=Homo sapiens GN=HEATR1 PE=1 SV=3	2.89592	0.0681583	0.0464313	0.461675	0.192754
Q9NVM6	DnaJ homolog subfamily C member 17 OS=Homo sapiens GN=DNAJC17 PE=1 SV=1	3.31918	0.0875937	0.040619	0.465938	0.0981809
O14976	Cyclin-G-associated kinase OS=Homo sapiens GN=GAK PE=1 SV=2	1.71956	0.211235	0.0403385	0.47692	0.131327
Q13303	Voltage-gated potassium channel subunit beta-2 OS=Homo sapiens GN=KCNAB2 PE=1 SV=2	1.71736	0.196268	0.0161702	0.484465	0.256531
Q99623	Prohibitin-2 OS=Homo sapiens GN=PHB2 PE=1 SV=2	2.62838	0.0742036	0.0269342	0.486091	0.264969
Q9H3P2	Negative elongation factor A OS=Homo sapiens GN=WHSC2 PE=1 SV=3	2.80276	0.0910414	0.0324275	0.489414	0.151837
P15311	Ezrin OS=Homo sapiens GN=EZR PE=1 SV=4	11.614	0.000140257	0.00149903	0.496512	0.183314
Q96A33	Coiled-coil domain-containing protein 47 OS=Homo sapiens GN=CCDC47 PE=1 SV=1	2.55953	0.0796464	0.0380658	0.499675	0.241068
P22695	Cytochrome b-c1 complex subunit 2, mitochondrial OS=Homo sapiens GN=UQCRC2 PE=1 SV=3	4.55602	0.0123346	0.0421567	0.502243	0.22492
O00429	Dynamin-1-like protein OS=Homo sapiens GN=DNM1L PE=1 SV=2	4.63033	0.0115882	0.0194874	0.505049	0.175193
P43243	Matrin-3 OS=Homo sapiens GN=MATR3 PE=1 SV=2	22.0356	2.79058e-06	0.00148936	0.516805	0.171568
P20674	Cytochrome c oxidase subunit 5A, mitochondrial OS=Homo sapiens GN=COX5A PE=1 SV=2	7.91986	0.001074	0.0417602	0.521524	0.185616
Q14839	Chromodomain-helicase-DNA-binding protein 4 OS=Homo sapiens GN=CHD4 PE=1 SV=2	4.31984	0.0320197	0.00524178	0.527464	0.144708
Q13435	Splicing factor 3B subunit 2 OS=Homo sapiens GN=SF3B2 PE=1 SV=2	6.18653	0.00345181	0.0184816	0.527586	0.244401
P22102	Trifunctional purine biosynthetic protein adenosine-3 OS=Homo sapiens GN=GART PE=1 SV=1	18.4726	8.66759e-06	0.00525145	0.531143	0.140941
P78527	DNA-dependent protein kinase catalytic subunit OS=Homo sapiens GN=PRKDC PE=1 SV=3	14.5408	3.78707e-05	0.0176499	0.536402	0.29326
P60842	Eukaryotic initiation factor 4A-I OS=Homo sapiens GN=EIF4A1 PE=1 SV=1	6.25645	0.0032819	0.0155222	0.548362	0.245915
Q9NR30	Nucleolar RNA helicase 2 OS=Homo sapiens GN=DDX21 PE=1 SV=5	8.63414	0.000694417	0.0238491	0.549076	0.249198
Q12931	Heat shock protein 75 kDa, mitochondrial OS=Homo sapiens GN=TRAP1 PE=1 SV=3	5.65588	0.00511618	0.0205222	0.554278	0.166839
O43615	Mitochondrial import inner membrane translocase subunit TIM44 OS=Homo sapiens GN=TIMM44 PE=1 SV=2	0.979037	0.446956	0.0398936	0.57218	0.13669
P00387	NADH-cytochrome b5 reductase 3 OS=Homo sapiens GN=CYB5R3 PE=1 SV=3	2.35022	0.0990551	0.0482882	0.574985	0.17276
P14868	Aspartyl-tRNA synthetase, cytoplasmic OS=Homo sapiens GN=DARS PE=1 SV=2	6.0237	0.0038871	0.0149516	0.575519	0.15375
Q13765	Nascent polypeptide-associated complex subunit alpha OS=Homo sapiens GN=NACA PE=1 SV=1	1.22076	0.341593	0.0440039	0.59471	0.18162
P60228	Eukaryotic translation initiation factor 3 subunit E OS=Homo sapiens GN=EIF3E PE=1 SV=1	4.05871	0.0189591	0.00768859	0.597955	0.145042
Q92499	ATP-dependent RNA helicase DDX1 OS=Homo sapiens GN=DDX1 PE=1 SV=2	4.76007	0.0104027	0.0496228	0.598984	0.28185
P07737	Profilin-1 OS=Homo sapiens GN=PFN1 PE=1 SV=2	3.38935	0.0350263	0.0347582	0.612017	0.298747
P02786	Transferrin receptor protein 1 OS=Homo sapiens GN=TFRC PE=1 SV=2	16.4686	1.77567e-05	0.0321663	0.612596	0.21475
P17844	Probable ATP-dependent RNA helicase DDX5 OS=Homo sapiens GN=DDX5 PE=1 SV=1	11.6903	0.000135154	0.0201838	0.618243	0.184448
P48595	Serpin B10 OS=Homo sapiens GN=SERPINB10 PE=1 SV=1	18.5443	8.45794e-06	0.00651838	0.619651	0.184472
A6NKZ8	Putative tubulin beta chain-like protein ENSP00000290377 OS=Homo sapiens PE=5 SV=2	4.69976	0.010936	0.0333075	0.619863	0.18477
Q04917	14-3-3 protein eta OS=Homo sapiens GN=YWHAH PE=1 SV=4	3.65846	0.0272284	0.0445841	0.630368	0.190015
P68363	Tubulin alpha-1B chain OS=Homo sapiens GN=TUBA1B PE=1 SV=1	12.1241	0.000109853	0.00138298	0.635485	0.152285
P61221	ATP-binding cassette sub-family E member 1 OS=Homo sapiens GN=ABCE1 PE=1 SV=1	3.74797	0.0331131	0.0492263	0.652706	0.162672
P05198	Eukaryotic translation initiation factor 2 subunit 1 OS=Homo sapiens GN=EIF2S1 PE=1 SV=3	3.66836	0.0269808	0.0348453	0.65719	0.0837955
P09874	Poly [ADP-ribose] polymerase 1 OS=Homo sapiens GN=PARP1 PE=1 SV=4	27.5901	6.26237e-07	0.00426499	0.663336	0.177386
P12004	Proliferating cell nuclear antigen OS=Homo sapiens GN=PCNA PE=1 SV=1	3.86172	0.0226146	0.0230658	1.50161	0.190711
Q15181	Inorganic pyrophosphatase OS=Homo sapiens GN=PPA1 PE=1 SV=2	3.17038	0.0432155	0.0245164	1.51327	0.188885
P25787	Proteasome subunit alpha type-2 OS=Homo sapiens GN=PSMA2 PE=1 SV=2	4.38979	0.0142071	0.0324468	1.53475	0.147832
O00303	Eukaryotic translation initiation factor 3 subunit F OS=Homo sapiens GN=EIF3F PE=1 SV=1	2.65712	0.0720537	0.0192553	1.53727	0.139916
Q12905	Interleukin enhancer-binding factor 2 OS=Homo sapiens GN=ILF2 PE=1 SV=2	3.12052	0.0453634	0.0282108	1.55811	0.183823
P80723	Brain acid soluble protein 1 OS=Homo sapiens GN=BASP1 PE=1 SV=2	5.29122	0.00678068	0.042205	1.56377	0.186103
P39019	40S ribosomal protein S19 OS=Homo sapiens GN=RPS19 PE=1 SV=2	4.03032	0.0194429	0.0103191	1.57836	0.142964
P07602	Proactivator polypeptide OS=Homo sapiens GN=PSAP PE=1 SV=2	10.6152	0.00023153	0.0151838	1.57995	0.12752
P30153	Serine/threonine-protein phosphatase 2A 65 kDa regulatory subunit A alpha isoform OS=Homo sapiens GN=PPP2R1A PE=1 SV=4	3.15823	0.0437283	0.00478723	1.59196	0.111813
P46777	60S ribosomal protein L5 OS=Homo sapiens GN=RPL5 PE=1 SV=3	9.05012	0.000544356	0.0045648	1.62139	0.11148
P23381	Tryptophanyl-tRNA synthetase, cytoplasmic OS=Homo sapiens GN=WARS PE=1 SV=2	27.6063	6.23767e-07	0.00410058	1.62246	0.126079
Q8WUM4	Programmed cell death 6-interacting protein OS=Homo sapiens GN=PDCD6IP PE=1 SV=1	6.0154	0.0039109	0.0037234	1.63599	0.108178
P05387	60S acidic ribosomal protein P2 OS=Homo sapiens GN=RPLP2 PE=1 SV=1	11.9534	0.000119112	0.00213733	1.63912	0.122947
P05388	60S acidic ribosomal protein P0 OS=Homo sapiens GN=RPLP0 PE=1 SV=1	6.04822	0.00381777	0.0104642	1.6418	0.17039
O43776	Asparaginyl-tRNA synthetase, cytoplasmic OS=Homo sapiens GN=NARS PE=1 SV=1	8.80852	0.000626474	0.00233075	1.64782	0.100546
P07108	Acyl-CoA-binding protein OS=Homo sapiens GN=DBI PE=1 SV=2	4.81483	0.00994355	0.00680851	1.65871	0.138829
O14818	Proteasome subunit alpha type-7 OS=Homo sapiens GN=PSMA7 PE=1 SV=1	6.52754	0.00270636	0.0339555	1.66359	0.180515
Q99497	Protein DJ-1 OS=Homo sapiens GN=PARK7 PE=1 SV=2	3.40995	0.034349	0.00269826	1.69278	0.141888
Q92597	Protein NDRG1 OS=Homo sapiens GN=NDRG1 PE=1 SV=1	1.92972	0.155445	0.0437524	1.72561	0.128576
P35244	Replication protein A 14 kDa subunit OS=Homo sapiens GN=RPA3 PE=1 SV=1	1.38917	0.282883	0.0365377	1.73293	0.187888
Q14019	Coactosin-like protein OS=Homo sapiens GN=COTL1 PE=1 SV=3	6.92181	0.00206071	0.00507737	1.74294	0.111926
P08133	Annexin A6 OS=Homo sapiens GN=ANXA6 PE=1 SV=3	36.7666	8.66908e-08	0.000203095	1.74437	0.105721
P38159	Heterogeneous nuclear ribonucleoprotein G OS=Homo sapiens GN=RBMX PE=1 SV=3	2.81028	0.0616883	0.0119826	1.7581	0.170577
P78417	Glutathione S-transferase omega-1 OS=Homo sapiens GN=GSTO1 PE=1 SV=2	1.95333	0.151499	0.0402128	1.76829	0.159626
P68402	Platelet-activating factor acetylhydrolase IB subunit beta OS=Homo sapiens GN=PAFAH1B2 PE=1 SV=1	3.14516	0.0442875	0.0310638	1.77161	0.174749
Q9BV40	Vesicle-associated membrane protein 8 OS=Homo sapiens GN=VAMP8 PE=1 SV=1	4.90723	0.00921928	0.00470019	1.77532	0.116407
P53618	Coatomer subunit beta OS=Homo sapiens GN=COPB1 PE=1 SV=3	4.56994	0.0121908	0.0366731	1.77688	0.14867
P53634	Dipeptidyl peptidase 1 OS=Homo sapiens GN=CTSC PE=1 SV=2	5.71595	0.00488862	0.0286557	1.79087	0.227727
P18669	Phosphoglycerate mutase 1 OS=Homo sapiens GN=PGAM1 PE=1 SV=2	24.7403	1.30106e-06	0.00128627	1.79951	0.133966
Q96KP4	Cytosolic non-specific dipeptidase OS=Homo sapiens GN=CNDP2 PE=1 SV=2	12.5787	8.89069e-05	0.00216634	1.80429	0.161037
P31949	Protein S100-A11 OS=Homo sapiens GN=S100A11 PE=1 SV=2	7.39806	0.00150012	0.0366538	1.82416	0.209544
P18206	Vinculin OS=Homo sapiens GN=VCL PE=1 SV=4	6.91345	0.00207246	0.00676015	1.84742	0.208383
P51858	Hepatoma-derived growth factor OS=Homo sapiens GN=HDGF PE=1 SV=1	2.90308	0.0562122	0.0253288	1.84924	0.185046
Q01518	Adenylyl cyclase-associated protein 1 OS=Homo sapiens GN=CAP1 PE=1 SV=5	21.8414	2.95651e-06	0.000116054	1.85785	0.0974773
P51149	Ras-related protein Rab-7a OS=Homo sapiens GN=RAB7A PE=1 SV=1	1.62808	0.21668	0.0166731	1.89791	0.268908
P08107	Heat shock 70 kDa protein 1A/1B OS=Homo sapiens GN=HSPA1A PE=1 SV=5	9.97123	0.000325534	0.00852031	1.89957	0.158271
P62310	U6 snRNA-associated Sm-like protein LSm3 OS=Homo sapiens GN=LSM3 PE=1 SV=2	3.34789	0.0364343	0.0281238	1.90087	0.0966307
Q9Y5M8	Signal recognition particle receptor subunit beta OS=Homo sapiens GN=SRPRB PE=1 SV=3	7.98593	0.0010305	0.00481625	1.93368	0.129191
Q13867	Bleomycin hydrolase OS=Homo sapiens GN=BLMH PE=1 SV=1	1.01077	0.431576	0.0440716	1.93502	0.165927
P42677	40S ribosomal protein S27 OS=Homo sapiens GN=RPS27 PE=1 SV=3	3.1777	0.0429099	0.0319632	1.93821	0.144612
Q9BTT0	Acidic leucine-rich nuclear phosphoprotein 32 family member E OS=Homo sapiens GN=ANP32E PE=1 SV=1	5.9004	0.0042578	0.0183752	1.94926	0.21723
Q9Y617	Phosphoserine aminotransferase OS=Homo sapiens GN=PSAT1 PE=1 SV=2	16.0413	2.08736e-05	0.0189942	1.94995	0.233351
Q9Y266	Nuclear migration protein nudC OS=Homo sapiens GN=NUDC PE=1 SV=1	6.27732	0.00323302	0.0287331	1.95358	0.219234
P38606	V-type proton ATPase catalytic subunit A OS=Homo sapiens GN=ATP6V1A PE=1 SV=2	7.23896	0.00166569	0.0397582	1.96469	0.184826
Q86UX7	Fermitin family homolog 3 OS=Homo sapiens GN=FERMT3 PE=1 SV=1	3.77449	0.0244786	0.0104642	1.97723	0.23466
Q14011	Cold-inducible RNA-binding protein OS=Homo sapiens GN=CIRBP PE=1 SV=1	2.22312	0.125779	0.038675	1.98132	0.171207
P54578	Ubiquitin carboxyl-terminal hydrolase 14 OS=Homo sapiens GN=USP14 PE=1 SV=3	4.77988	0.010234	0.0189845	1.98936	0.172482
P20618	Proteasome subunit beta type-1 OS=Homo sapiens GN=PSMB1 PE=1 SV=2	9.90731	0.000337005	0.00253385	2.03531	0.151859
O43399	Tumor protein D54 OS=Homo sapiens GN=TPD52L2 PE=1 SV=2	2.04697	0.136874	0.0094294	2.05333	0.0977563
P29692	Elongation factor 1-delta OS=Homo sapiens GN=EEF1D PE=1 SV=5	16.1025	2.0392e-05	0.00141199	2.05884	0.12711
P62993	Growth factor receptor-bound protein 2 OS=Homo sapiens GN=GRB2 PE=1 SV=1	2.68292	0.0701814	0.0106093	2.06794	0.157105
P62942	Peptidyl-prolyl cis-trans isomerase FKBP1A OS=Homo sapiens GN=FKBP1A PE=1 SV=2	5.1675	0.00747707	0.00768859	2.11593	0.158348
Q9H4M9	EH domain-containing protein 1 OS=Homo sapiens GN=EHD1 PE=1 SV=2	6.57131	0.00434813	0.0342456	2.16186	0.20255
P52209	6-phosphogluconate dehydrogenase, decarboxylating OS=Homo sapiens GN=PGD PE=1 SV=3	37.8276	7.10079e-08	0.000222437	2.17127	0.15496
Q14157	Ubiquitin-associated protein 2-like OS=Homo sapiens GN=UBAP2L PE=1 SV=2	4.20252	0.023055	0.0347002	2.17809	0.113273
P62995	Transformer-2 protein homolog beta OS=Homo sapiens GN=TRA2B PE=1 SV=1	3.2467	0.0401423	0.0123308	2.32858	0.193546
O15427	Monocarboxylate transporter 4 OS=Homo sapiens GN=SLC16A3 PE=1 SV=1	2.16009	0.1212	0.00798839	2.34565	0.134159
P30042	ES1 protein homolog, mitochondrial OS=Homo sapiens GN=C21orf33 PE=1 SV=3	2.71852	0.0676849	0.0170019	2.35061	0.199308
P37108	Signal recognition particle 14 kDa protein OS=Homo sapiens GN=SRP14 PE=1 SV=2	1.6919	0.201876	0.0469729	2.35899	0.218324
Q15363	Transmembrane emp24 domain-containing protein 2 OS=Homo sapiens GN=TMED2 PE=1 SV=1	4.43695	0.0136454	0.00356867	2.45368	0.159508
P60468	Protein transport protein Sec61 subunit beta OS=Homo sapiens GN=SEC61B PE=1 SV=2	7.56291	0.00134781	0.00896518	2.48046	0.097144
Q13177	Serine/threonine-protein kinase PAK 2 OS=Homo sapiens GN=PAK2 PE=1 SV=3	3.14515	0.0548487	0.00841393	2.53921	0.217411
P61326	Protein mago nashi homolog OS=Homo sapiens GN=MAGOH PE=1 SV=1	2.66126	0.0717492	0.0307253	2.59189	0.19242
P84095	Rho-related GTP-binding protein RhoG OS=Homo sapiens GN=RHOG PE=1 SV=1	5.79072	0.00462107	0.00334623	2.60855	0.135325
P18085	ADP-ribosylation factor 4 OS=Homo sapiens GN=ARF4 PE=1 SV=3	5.60331	0.00532509	0.0219729	2.63687	0.2299
O14950	Myosin regulatory light chain 12B OS=Homo sapiens GN=MYL12B PE=1 SV=2	6.57029	0.00262638	0.00437137	2.64631	0.214615
P30626	Sorcin OS=Homo sapiens GN=SRI PE=1 SV=1	4.75602	0.0104376	0.0172631	2.68084	0.138269
P56134	ATP synthase subunit f, mitochondrial OS=Homo sapiens GN=ATP5J2 PE=1 SV=3	4.18927	0.0169006	0.0133946	2.68657	0.131799
E7EPW1	Uncharacterized protein OS=Homo sapiens GN=GAPDH PE=3 SV=1	1.93102	0.155226	0.0202611	2.68669	0.167671
Q92598	Heat shock protein 105 kDa OS=Homo sapiens GN=HSPH1 PE=1 SV=1	4.80287	0.0100419	0.000918762	2.70625	0.18023
Q14847	LIM and SH3 domain protein 1 OS=Homo sapiens GN=LASP1 PE=1 SV=2	9.54624	0.000792711	0.00766925	2.74091	0.159306
P11413	Glucose-6-phosphate 1-dehydrogenase OS=Homo sapiens GN=G6PD PE=1 SV=4	79.9094	3.13019e-10	0.000116054	2.76787	0.097643
Q13347	Eukaryotic translation initiation factor 3 subunit I OS=Homo sapiens GN=EIF3I PE=1 SV=1	10.6008	0.000468593	0.0162282	2.77035	0.146637
Q9H299	SH3 domain-binding glutamic acid-rich-like protein 3 OS=Homo sapiens GN=SH3BGRL3 PE=1 SV=1	6.58742	0.00259508	0.00833656	2.92498	0.268054
Q13404	Ubiquitin-conjugating enzyme E2 variant 1 OS=Homo sapiens GN=UBE2V1 PE=1 SV=2	7.53553	0.00137185	0.0077176	2.94751	0.144594
Q99460	26S proteasome non-ATPase regulatory subunit 1 OS=Homo sapiens GN=PSMD1 PE=1 SV=2	4.92279	0.00910324	0.0212186	3.0175	0.193985
Q8TAA3	Proteasome subunit alpha type-7-like OS=Homo sapiens GN=PSMA8 PE=1 SV=3	3.98007	0.020333	0.00687621	3.27933	0.145629
P09382	Galectin-1 OS=Homo sapiens GN=LGALS1 PE=1 SV=2	10.3359	0.000267935	0.00344294	3.29652	0.202029
O75844	CAAX prenyl protease 1 homolog OS=Homo sapiens GN=ZMPSTE24 PE=1 SV=2	3.36336	0.0359018	0.032118	3.35379	0.285844
Q9NX40	OCIA domain-containing protein 1 OS=Homo sapiens GN=OCIAD1 PE=1 SV=1	5.88325	0.0043124	0.0230658	3.36394	0.225895
Q96AG4	Leucine-rich repeat-containing protein 59 OS=Homo sapiens GN=LRRC59 PE=1 SV=1	18.8163	7.71271e-06	0.000551257	3.39576	0.167037
P54920	Alpha-soluble NSF attachment protein OS=Homo sapiens GN=NAPA PE=1 SV=3	3.72655	0.0255756	0.00755319	3.45245	0.24555
P18859	ATP synthase-coupling factor 6, mitochondrial OS=Homo sapiens GN=ATP5J PE=1 SV=1	6.56879	0.00262914	0.0432882	3.54289	0.265537
Q9H444	Charged multivesicular body protein 4b OS=Homo sapiens GN=CHMP4B PE=1 SV=1	5.51466	0.0056994	0.005706	3.56562	0.188822
Q9UQ35	Serine/arginine repetitive matrix protein 2 OS=Homo sapiens GN=SRRM2 PE=1 SV=2	1.65853	0.216539	0.0441683	3.70387	0.274331
P69905	Hemoglobin subunit alpha OS=Homo sapiens GN=HBA1 PE=1 SV=2	13.4404	6.0426e-05	0.00257253	3.79345	0.188403
P09467	Fructose-1,6-bisphosphatase 1 OS=Homo sapiens GN=FBP1 PE=1 SV=5	2.81164	0.0616035	0.0031528	3.82207	0.150773
P04818	Thymidylate synthase OS=Homo sapiens GN=TYMS PE=1 SV=3	4.64017	0.0261134	0.009294	3.82714	0.175263
Q9GZT3	SRA stem-loop-interacting RNA-binding protein, mitochondrial OS=Homo sapiens GN=SLIRP PE=1 SV=1	7.55351	0.00135601	0.00720503	4.2002	0.173402
P48556	26S proteasome non-ATPase regulatory subunit 8 OS=Homo sapiens GN=PSMD8 PE=1 SV=2	3.75126	0.0250035	0.00749516	4.65901	0.208314
P07339	Cathepsin D OS=Homo sapiens GN=CTSD PE=1 SV=1	84.4355	2.07673e-10	1.93424e-05	4.69726	0.167726
P40121	Macrophage-capping protein OS=Homo sapiens GN=CAPG PE=1 SV=2	16.0152	2.10836e-05	0.000696325	4.93917	0.2469
Q15942	Zyxin OS=Homo sapiens GN=ZYX PE=1 SV=1	26.5025	8.21255e-07	0.000116054	5.08239	0.118837
P49721	Proteasome subunit beta type-2 OS=Homo sapiens GN=PSMB2 PE=1 SV=1	20.6204	4.2935e-06	0.000203095	5.25303	0.138081
O95831	Apoptosis-inducing factor 1, mitochondrial OS=Homo sapiens GN=AIFM1 PE=1 SV=1	5.25919	0.00695372	0.00777563	5.2864	0.256691
P50552	Vasodilator-stimulated phosphoprotein OS=Homo sapiens GN=VASP PE=1 SV=3	21.1747	3.61654e-06	0.000203095	7.44868	0.262996
O14745	Na(+)/H(+) exchange regulatory cofactor NHE-RF1 OS=Homo sapiens GN=SLC9A3R1 PE=1 SV=4	13.0272	7.25492e-05	0.000232108	7.89566	0.217269

## Sheet: Yes-set 48h (all DEPs)
ID	annotation	F.stat	p.value	pvals.0h.48h	ER.48h.0h	CV
P08670	Vimentin OS=Homo sapiens GN=VIM PE=1 SV=4	31.6399	3.11927e-06	0	0.135361	0.071406
Q08945	FACT complex subunit SSRP1 OS=Homo sapiens GN=SSRP1 PE=1 SV=1	4.78365	0.0148272	0.00268595	0.215327	0.277505
Q01581	Hydroxymethylglutaryl-CoA synthase, cytoplasmic OS=Homo sapiens GN=HMGCS1 PE=1 SV=2	7.21172	0.00292026	0.000330579	0.215909	0.209509
Q9NUU7	ATP-dependent RNA helicase DDX19A OS=Homo sapiens GN=DDX19A PE=1 SV=1	6.65309	0.00808337	0.00845041	0.229423	0.191971
P20290	Transcription factor BTF3 OS=Homo sapiens GN=BTF3 PE=1 SV=1	5.44955	0.00918732	0.000743802	0.236749	0.172044
P30520	Adenylosuccinate synthetase isozyme 2 OS=Homo sapiens GN=ADSS PE=1 SV=3	3.92019	0.0214536	0.00424587	0.254416	0.232475
Q14444	Caprin-1 OS=Homo sapiens GN=CAPRIN1 PE=1 SV=2	2.76453	0.0765894	0.00647727	0.275211	0.17129
Q86XP3	ATP-dependent RNA helicase DDX42 OS=Homo sapiens GN=DDX42 PE=1 SV=1	3.50781	0.0403472	0.00788223	0.292641	0.162281
P47897	Glutaminyl-tRNA synthetase OS=Homo sapiens GN=QARS PE=1 SV=1	2.56843	0.0914009	0.0114979	0.306922	0.225374
Q9Y6E2	Basic leucine zipper and W2 domain-containing protein 2 OS=Homo sapiens GN=BZW2 PE=1 SV=1	3.87544	0.0298697	0.0119112	0.308082	0.225215
P20674	Cytochrome c oxidase subunit 5A, mitochondrial OS=Homo sapiens GN=COX5A PE=1 SV=2	7.91986	0.001074	0.00610537	0.310159	0.185616
Q96A33	Coiled-coil domain-containing protein 47 OS=Homo sapiens GN=CCDC47 PE=1 SV=1	2.55953	0.0796464	0.0172107	0.315287	0.241068
Q9Y2W1	Thyroid hormone receptor-associated protein 3 OS=Homo sapiens GN=THRAP3 PE=1 SV=2	3.82617	0.0233546	0.0129545	0.320391	0.196379
P25098	Beta-adrenergic receptor kinase 1 OS=Homo sapiens GN=ADRBK1 PE=1 SV=2	4.34134	0.0207037	0.00577479	0.331191	0.167426
Q9NYF8	Bcl-2-associated transcription factor 1 OS=Homo sapiens GN=BCLAF1 PE=1 SV=2	5.02954	0.00834966	0.0160227	0.353957	0.238786
Q16531	DNA damage-binding protein 1 OS=Homo sapiens GN=DDB1 PE=1 SV=1	2.1111	0.127737	0.048843	0.355864	0.223695
P00441	Superoxide dismutase [Cu-Zn] OS=Homo sapiens GN=SOD1 PE=1 SV=2	2.04451	0.137238	0.0283161	0.362135	0.218936
P04632	Calpain small subunit 1 OS=Homo sapiens GN=CAPNS1 PE=1 SV=1	2.30023	0.104417	0.0481508	0.362682	0.17538
O75475	PC4 and SFRS1-interacting protein OS=Homo sapiens GN=PSIP1 PE=1 SV=1	1.89943	0.171211	0.0384091	0.369376	0.172369
Q08J23	tRNA (cytosine(34)-C(5))-methyltransferase OS=Homo sapiens GN=NSUN2 PE=1 SV=2	3.13234	0.0716769	0.0331198	0.369775	0.178279
P02786	Transferrin receptor protein 1 OS=Homo sapiens GN=TFRC PE=1 SV=2	16.4686	1.77567e-05	0.00139463	0.370356	0.21475
O76094	Signal recognition particle 72 kDa protein OS=Homo sapiens GN=SRP72 PE=1 SV=3	5.13887	0.00764942	0.0123864	0.37076	0.191836
P50416	Carnitine O-palmitoyltransferase 1, liver isoform OS=Homo sapiens GN=CPT1A PE=1 SV=2	2.77515	0.0639119	0.0171488	0.370927	0.215107
P17844	Probable ATP-dependent RNA helicase DDX5 OS=Homo sapiens GN=DDX5 PE=1 SV=1	11.6903	0.000135154	0.00112603	0.372778	0.184448
O60832	H/ACA ribonucleoprotein complex subunit 4 OS=Homo sapiens GN=DKC1 PE=1 SV=3	1.96993	0.148789	0.0282541	0.375666	0.213585
Q99829	Copine-1 OS=Homo sapiens GN=CPNE1 PE=1 SV=1	2.57947	0.0904872	0.00735537	0.375866	0.173554
Q9Y230	RuvB-like 2 OS=Homo sapiens GN=RUVBL2 PE=1 SV=3	2.2824	0.106405	0.0118182	0.381493	0.260198
P61289	Proteasome activator complex subunit 3 OS=Homo sapiens GN=PSME3 PE=1 SV=1	13.1654	6.82119e-05	0.000495868	0.387226	0.170797
P51148	Ras-related protein Rab-5C OS=Homo sapiens GN=RAB5C PE=1 SV=2	1.9676	0.149166	0.037655	0.394223	0.267684
P49755	Transmembrane emp24 domain-containing protein 10 OS=Homo sapiens GN=TMED10 PE=1 SV=2	12.38	9.74507e-05	0.000929752	0.399877	0.167959
Q9NSD9	Phenylalanyl-tRNA synthetase beta chain OS=Homo sapiens GN=FARSB PE=1 SV=3	8.4148	0.000791939	0.00594008	0.402599	0.211029
P22695	Cytochrome b-c1 complex subunit 2, mitochondrial OS=Homo sapiens GN=UQCRC2 PE=1 SV=3	4.55602	0.0123346	0.0223244	0.413893	0.22492
Q6PKG0	La-related protein 1 OS=Homo sapiens GN=LARP1 PE=1 SV=2	4.47653	0.0186688	0.00265496	0.416928	0.180843
P30566	Adenylosuccinate lyase OS=Homo sapiens GN=ADSL PE=1 SV=2	5.00047	0.00854772	0.00621901	0.421528	0.26554
P61221	ATP-binding cassette sub-family E member 1 OS=Homo sapiens GN=ABCE1 PE=1 SV=1	3.74797	0.0331131	0.00597107	0.428596	0.162672
Q9NXG2	THUMP domain-containing protein 1 OS=Homo sapiens GN=THUMPD1 PE=1 SV=2	2.64589	0.0728853	0.0179339	0.431676	0.09458
Q13151	Heterogeneous nuclear ribonucleoprotein A0 OS=Homo sapiens GN=HNRNPA0 PE=1 SV=1	1.84924	0.179731	0.0372831	0.439367	0.158801
Q14139	Ubiquitin conjugation factor E4 A OS=Homo sapiens GN=UBE4A PE=1 SV=2	1.73009	0.201855	0.0431921	0.440562	0.194894
P54136	Arginyl-tRNA synthetase, cytoplasmic OS=Homo sapiens GN=RARS PE=1 SV=2	2.11894	0.126665	0.026312	0.446412	0.228743
P49915	GMP synthase [glutamine-hydrolyzing] OS=Homo sapiens GN=GMPS PE=1 SV=1	4.29068	0.0215292	0.0240083	0.446536	0.209302
Q92499	ATP-dependent RNA helicase DDX1 OS=Homo sapiens GN=DDX1 PE=1 SV=2	4.76007	0.0104027	0.00772727	0.446873	0.28185
P15311	Ezrin OS=Homo sapiens GN=EZR PE=1 SV=4	11.614	0.000140257	0.000495868	0.447118	0.183314
Q9Y4W6	AFG3-like protein 2 OS=Homo sapiens GN=AFG3L2 PE=1 SV=2	1.62203	0.224469	0.0416219	0.448502	0.0853008
P06865	Beta-hexosaminidase subunit alpha OS=Homo sapiens GN=HEXA PE=1 SV=2	1.5897	0.226127	0.0472831	0.44887	0.2178
Q9UMX0	Ubiquilin-1 OS=Homo sapiens GN=UBQLN1 PE=1 SV=2	2.2397	0.111335	0.0424483	0.453193	0.254877
O15355	Protein phosphatase 1G OS=Homo sapiens GN=PPM1G PE=1 SV=1	2.9096	0.0673412	0.0389256	0.453271	0.201996
Q8WXF1	Paraspeckle component 1 OS=Homo sapiens GN=PSPC1 PE=1 SV=1	2.38404	0.0955982	0.0476963	0.457342	0.209295
P39023	60S ribosomal protein L3 OS=Homo sapiens GN=RPL3 PE=1 SV=2	4.42085	0.0138344	0.0123657	0.465764	0.227922
Q9P2J5	Leucyl-tRNA synthetase, cytoplasmic OS=Homo sapiens GN=LARS PE=1 SV=2	6.75984	0.00230232	0.0116736	0.466967	0.28031
P16070	CD44 antigen OS=Homo sapiens GN=CD44 PE=1 SV=3	2.78421	0.0633298	0.043626	0.467214	0.187903
Q9H583	HEAT repeat-containing protein 1 OS=Homo sapiens GN=HEATR1 PE=1 SV=3	2.89592	0.0681583	0.0221901	0.467918	0.192754
Q9Y5K5	Ubiquitin carboxyl-terminal hydrolase isozyme L5 OS=Homo sapiens GN=UCHL5 PE=1 SV=3	6.70317	0.00399948	0.0143698	0.46847	0.133285
Q15813	Tubulin-specific chaperone E OS=Homo sapiens GN=TBCE PE=1 SV=1	1.51362	0.2499	0.029845	0.47485	0.136638
P07384	Calpain-1 catalytic subunit OS=Homo sapiens GN=CAPN1 PE=1 SV=1	2.71293	0.0680699	0.0451343	0.475509	0.139553
P48595	Serpin B10 OS=Homo sapiens GN=SERPINB10 PE=1 SV=1	18.5443	8.45794e-06	0.000495868	0.476502	0.184472
Q16543	Hsp90 co-chaperone Cdc37 OS=Homo sapiens GN=CDC37 PE=1 SV=1	7.22436	0.00168188	0.00842975	0.47901	0.186392
P22102	Trifunctional purine biosynthetic protein adenosine-3 OS=Homo sapiens GN=GART PE=1 SV=1	18.4726	8.66759e-06	0.00270661	0.480226	0.140941
P26640	Valyl-tRNA synthetase OS=Homo sapiens GN=VARS PE=1 SV=4	14.6092	3.68202e-05	0.000144628	0.482769	0.099088
P23434	Glycine cleavage system H protein, mitochondrial OS=Homo sapiens GN=GCSH PE=1 SV=2	1.25415	0.329061	0.0294525	0.491224	0.105892
Q12931	Heat shock protein 75 kDa, mitochondrial OS=Homo sapiens GN=TRAP1 PE=1 SV=3	5.65588	0.00511618	0.00846074	0.500033	0.166839
P01889	HLA class I histocompatibility antigen, B-7 alpha chain OS=Homo sapiens GN=HLA-B PE=1 SV=3	2.93756	0.0543154	0.0100517	0.500187	0.166716
Q9NR30	Nucleolar RNA helicase 2 OS=Homo sapiens GN=DDX21 PE=1 SV=5	8.63414	0.000694417	0.0164773	0.500824	0.249198
O00567	Nucleolar protein 56 OS=Homo sapiens GN=NOP56 PE=1 SV=4	6.31895	0.00313793	0.0128719	0.50187	0.23305
Q9UBQ0	Vacuolar protein sorting-associated protein 29 OS=Homo sapiens GN=VPS29 PE=1 SV=1	1.6403	0.213761	0.0458161	0.51018	0.150365
P78527	DNA-dependent protein kinase catalytic subunit OS=Homo sapiens GN=PRKDC PE=1 SV=3	14.5408	3.78707e-05	0.0139876	0.511219	0.29326
Q2VIR3	Eukaryotic translation initiation factor 2 subunit 3-like protein OS=Homo sapiens GN=EIF2S3L PE=1 SV=2	1.2053	0.34755	0.0467872	0.514006	0.129821
Q9Y266	Nuclear migration protein nudC OS=Homo sapiens GN=NUDC PE=1 SV=1	6.27732	0.00323302	0.040155	0.517615	0.219234
P45974	Ubiquitin carboxyl-terminal hydrolase 5 OS=Homo sapiens GN=USP5 PE=1 SV=2	1.72293	0.203276	0.0318388	0.521322	0.19706
P60953	Cell division control protein 42 homolog OS=Homo sapiens GN=CDC42 PE=1 SV=2	1.38971	0.282712	0.0266839	0.533259	0.150524
Q8NBJ5	Procollagen galactosyltransferase 1 OS=Homo sapiens GN=GLT25D1 PE=1 SV=1	1.92672	0.155955	0.0267355	0.535451	0.140528
P25205	DNA replication licensing factor MCM3 OS=Homo sapiens GN=MCM3 PE=1 SV=3	25.6116	1.03285e-06	0.000247934	0.536138	0.138181
P42167	Lamina-associated polypeptide 2, isoforms beta/gamma OS=Homo sapiens GN=TMPO PE=1 SV=2	4.25103	0.0160147	0.0364876	0.538074	0.208764
Q8TEX9	Importin-4 OS=Homo sapiens GN=IPO4 PE=1 SV=2	11.9152	0.000121302	0.00594008	0.54862	0.171203
Q01844	RNA-binding protein EWS OS=Homo sapiens GN=EWSR1 PE=1 SV=1	1.79078	0.181	0.0335227	0.550141	0.125016
O14744	Protein arginine N-methyltransferase 5 OS=Homo sapiens GN=PRMT5 PE=1 SV=4	1.94258	0.153284	0.0468388	0.551493	0.184924
P16989	DNA-binding protein A OS=Homo sapiens GN=CSDA PE=1 SV=4	4.65071	0.0113924	0.00795455	0.557824	0.122941
O43809	Cleavage and polyadenylation specificity factor subunit 5 OS=Homo sapiens GN=NUDT21 PE=1 SV=1	4.43638	0.0136521	0.0143698	0.56433	0.167311
P43243	Matrin-3 OS=Homo sapiens GN=MATR3 PE=1 SV=2	22.0356	2.79058e-06	0.00386364	0.567923	0.171568
P05198	Eukaryotic translation initiation factor 2 subunit 1 OS=Homo sapiens GN=EIF2S1 PE=1 SV=3	3.66836	0.0269808	0.0175207	0.581855	0.0837955
P14868	Aspartyl-tRNA synthetase, cytoplasmic OS=Homo sapiens GN=DARS PE=1 SV=2	6.0237	0.0038871	0.016343	0.583014	0.15375
Q7Z4W1	L-xylulose reductase OS=Homo sapiens GN=DCXR PE=1 SV=2	2.17822	0.118873	0.0295764	0.596558	0.104023
Q15459	Splicing factor 3A subunit 1 OS=Homo sapiens GN=SF3A1 PE=1 SV=1	9.36814	0.000454108	0.0121281	0.606992	0.130249
Q16630	Cleavage and polyadenylation specificity factor subunit 6 OS=Homo sapiens GN=CPSF6 PE=1 SV=2	2.55595	0.0799413	0.0398347	0.611894	0.211982
P09874	Poly [ADP-ribose] polymerase 1 OS=Homo sapiens GN=PARP1 PE=1 SV=4	27.5901	6.26237e-07	0.00188017	0.622502	0.177386
Q96QK1	Vacuolar protein sorting-associated protein 35 OS=Homo sapiens GN=VPS35 PE=1 SV=2	2.76126	0.0648155	0.0441942	0.625066	0.257979
Q6P2Q9	Pre-mRNA-processing-splicing factor 8 OS=Homo sapiens GN=PRPF8 PE=1 SV=2	2.89628	0.0565945	0.0426136	0.63071	0.298531
P07737	Profilin-1 OS=Homo sapiens GN=PFN1 PE=1 SV=2	3.38935	0.0350263	0.0499483	0.630861	0.298747
P49321	Nuclear autoantigenic sperm protein OS=Homo sapiens GN=NASP PE=1 SV=2	10.7618	0.000214679	0.0120041	0.631881	0.127949
Q14978	Nucleolar and coiled-body phosphoprotein 1 OS=Homo sapiens GN=NOLC1 PE=1 SV=2	7.38882	0.00150921	0.0271178	0.634422	0.200759
O95373	Importin-7 OS=Homo sapiens GN=IPO7 PE=1 SV=1	5.83745	0.00446219	0.0118285	0.634696	0.132236
P42704	Leucine-rich PPR motif-containing protein, mitochondrial OS=Homo sapiens GN=LRPPRC PE=1 SV=3	32.682	1.96721e-07	0.00036157	0.637192	0.132484
Q9UHL4	Dipeptidyl peptidase 2 OS=Homo sapiens GN=DPP7 PE=1 SV=3	1.90581	0.159555	0.0335537	0.639264	0.0971823
O60610	Protein diaphanous homolog 1 OS=Homo sapiens GN=DIAPH1 PE=1 SV=2	6.13495	0.00358348	0.015031	0.639532	0.187387
P07954	Fumarate hydratase, mitochondrial OS=Homo sapiens GN=FH PE=1 SV=3	1.50153	0.249483	0.032624	0.640967	0.107295
P15144	Aminopeptidase N OS=Homo sapiens GN=ANPEP PE=1 SV=4	2.04076	0.137795	0.0122521	0.644412	0.181031
P04406	Glyceraldehyde-3-phosphate dehydrogenase OS=Homo sapiens GN=GAPDH PE=1 SV=3	10.3547	0.000265289	0.00421488	0.653248	0.186201
Q15046	Lysyl-tRNA synthetase OS=Homo sapiens GN=KARS PE=1 SV=3	2.60647	0.0758903	0.0358678	0.65332	0.147915
P38919	Eukaryotic initiation factor 4A-III OS=Homo sapiens GN=EIF4A3 PE=1 SV=4	2.79937	0.0623694	0.048905	0.664382	0.124408
P54577	Tyrosyl-tRNA synthetase, cytoplasmic OS=Homo sapiens GN=YARS PE=1 SV=4	3.60738	0.0285464	0.0104959	1.51099	0.132396
P46777	60S ribosomal protein L5 OS=Homo sapiens GN=RPL5 PE=1 SV=3	9.05012	0.000544356	0.0140496	1.51932	0.11148
P39019	40S ribosomal protein S19 OS=Homo sapiens GN=RPS19 PE=1 SV=2	4.03032	0.0194429	0.0178926	1.52508	0.142964
P35579	Myosin-9 OS=Homo sapiens GN=MYH9 PE=1 SV=4	78.9263	3.43194e-10	1.03306e-05	1.53294	0.0535566
P07108	Acyl-CoA-binding protein OS=Homo sapiens GN=DBI PE=1 SV=2	4.81483	0.00994355	0.0195868	1.53401	0.138829
P26038	Moesin OS=Homo sapiens GN=MSN PE=1 SV=3	10.8673	0.0002034	0.000299587	1.53578	0.0952494
P56192	Methionyl-tRNA synthetase, cytoplasmic OS=Homo sapiens GN=MARS PE=1 SV=2	2.26862	0.10797	0.0156921	1.54869	0.152865
P23284	Peptidyl-prolyl cis-trans isomerase B OS=Homo sapiens GN=PPIB PE=1 SV=2	10.2936	0.000273989	0.00397727	1.56773	0.110984
P20645	Cation-dependent mannose-6-phosphate receptor OS=Homo sapiens GN=M6PR PE=1 SV=1	3.55258	0.0300395	0.0233471	1.58667	0.11185
O00299	Chloride intracellular channel protein 1 OS=Homo sapiens GN=CLIC1 PE=1 SV=4	2.85069	0.0592343	0.0351963	1.5957	0.231063
P05387	60S acidic ribosomal protein P2 OS=Homo sapiens GN=RPLP2 PE=1 SV=1	11.9534	0.000119112	0.00392562	1.60906	0.122947
O14818	Proteasome subunit alpha type-7 OS=Homo sapiens GN=PSMA7 PE=1 SV=1	6.52754	0.00270636	0.0459711	1.61141	0.180515
A5A3E0	POTE ankyrin domain family member F OS=Homo sapiens GN=POTEF PE=1 SV=2	4.36433	0.0145209	0.00543388	1.61809	0.196167
P07602	Proactivator polypeptide OS=Homo sapiens GN=PSAP PE=1 SV=2	10.6152	0.00023153	0.0115496	1.62993	0.12752
P15153	Ras-related C3 botulinum toxin substrate 2 OS=Homo sapiens GN=RAC2 PE=1 SV=1	2.31967	0.102296	0.0443079	1.64471	0.229246
P13995	Bifunctional methylenetetrahydrofolate dehydrogenase/cyclohydrolase, mitochondrial OS=Homo sapiens GN=MTHFD2 PE=1 SV=2	2.62828	0.0742114	0.0443079	1.64962	0.158526
P15531	Nucleoside diphosphate kinase A OS=Homo sapiens GN=NME1 PE=1 SV=1	6.10762	0.00365554	0.00381198	1.65401	0.157062
P0CG47	Polyubiquitin-B OS=Homo sapiens GN=UBB PE=1 SV=1	3.62392	0.0281119	0.00527893	1.65471	0.116096
P11021	78 kDa glucose-regulated protein OS=Homo sapiens GN=HSPA5 PE=1 SV=2	37.8312	7.09597e-08	0.000216942	1.65657	0.11487
P60660	Myosin light polypeptide 6 OS=Homo sapiens GN=MYL6 PE=1 SV=2	14.968	3.18165e-05	0.000423554	1.68904	0.0704165
P40926	Malate dehydrogenase, mitochondrial OS=Homo sapiens GN=MDH2 PE=1 SV=3	14.0743	4.60114e-05	0.00103306	1.70331	0.117656
P35659	Protein DEK OS=Homo sapiens GN=DEK PE=1 SV=1	1.9894	0.145678	0.0396074	1.70384	0.192174
P28070	Proteasome subunit beta type-4 OS=Homo sapiens GN=PSMB4 PE=1 SV=4	2.59227	0.0770058	0.0225517	1.71445	0.179428
Q14019	Coactosin-like protein OS=Homo sapiens GN=COTL1 PE=1 SV=3	6.92181	0.00206071	0.00665289	1.74649	0.111926
P25787	Proteasome subunit alpha type-2 OS=Homo sapiens GN=PSMA2 PE=1 SV=2	4.38979	0.0142071	0.00923554	1.75678	0.147832
Q15691	Microtubule-associated protein RP/EB family member 1 OS=Homo sapiens GN=MAPRE1 PE=1 SV=3	1.45436	0.262985	0.0375723	1.7635	0.158236
P53618	Coatomer subunit beta OS=Homo sapiens GN=COPB1 PE=1 SV=3	4.56994	0.0121908	0.0441219	1.76784	0.14867
Q92688	Acidic leucine-rich nuclear phosphoprotein 32 family member B OS=Homo sapiens GN=ANP32B PE=1 SV=1	2.38262	0.0957408	0.0126343	1.76897	0.10943
Q01518	Adenylyl cyclase-associated protein 1 OS=Homo sapiens GN=CAP1 PE=1 SV=5	21.8414	2.95651e-06	0.000320248	1.7768	0.0974773
P00367	Glutamate dehydrogenase 1, mitochondrial OS=Homo sapiens GN=GLUD1 PE=1 SV=2	9.40394	0.00044505	0.00905992	1.79522	0.193512
P54709	Sodium/potassium-transporting ATPase subunit beta-3 OS=Homo sapiens GN=ATP1B3 PE=1 SV=1	5.09928	0.00789511	0.0401963	1.81672	0.149698
P54578	Ubiquitin carboxyl-terminal hydrolase 14 OS=Homo sapiens GN=USP14 PE=1 SV=3	4.77988	0.010234	0.0315909	1.84268	0.172482
P05388	60S acidic ribosomal protein P0 OS=Homo sapiens GN=RPLP0 PE=1 SV=1	6.04822	0.00381777	0.00338843	1.86083	0.17039
P38117	Electron transfer flavoprotein subunit beta OS=Homo sapiens GN=ETFB PE=1 SV=3	3.03533	0.0603207	0.0477996	1.86246	0.148745
P08133	Annexin A6 OS=Homo sapiens GN=ANXA6 PE=1 SV=3	36.7666	8.66908e-08	0.000113636	1.87444	0.105721
P33778	Histone H2B type 1-B OS=Homo sapiens GN=HIST1H2BB PE=1 SV=2	1.84633	0.170284	0.0299174	1.89542	0.233264
Q96HE7	ERO1-like protein alpha OS=Homo sapiens GN=ERO1L PE=1 SV=2	6.19297	0.00343577	0.0430165	1.93224	0.175306
P09661	U2 small nuclear ribonucleoprotein A' OS=Homo sapiens GN=SNRPA1 PE=1 SV=2	1.85082	0.169448	0.0342355	1.95393	0.209079
Q96KP4	Cytosolic non-specific dipeptidase OS=Homo sapiens GN=CNDP2 PE=1 SV=2	12.5787	8.89069e-05	0.00125	1.95943	0.161037
Q9Y5M8	Signal recognition particle receptor subunit beta OS=Homo sapiens GN=SRPRB PE=1 SV=3	7.98593	0.0010305	0.00528926	1.9738	0.129191
P42677	40S ribosomal protein S27 OS=Homo sapiens GN=RPS27 PE=1 SV=3	3.1777	0.0429099	0.0332231	1.97771	0.144612
Q92882	Osteoclast-stimulating factor 1 OS=Homo sapiens GN=OSTF1 PE=1 SV=2	4.68058	0.011112	0.015186	1.98003	0.0896807
Q9Y3F4	Serine-threonine kinase receptor-associated protein OS=Homo sapiens GN=STRAP PE=1 SV=1	1.82562	0.174199	0.0353822	2.02313	0.132931
P20618	Proteasome subunit beta type-1 OS=Homo sapiens GN=PSMB1 PE=1 SV=2	9.90731	0.000337005	0.00379132	2.02411	0.151859
P62942	Peptidyl-prolyl cis-trans isomerase FKBP1A OS=Homo sapiens GN=FKBP1A PE=1 SV=2	5.1675	0.00747707	0.0129545	2.02642	0.158348
P80723	Brain acid soluble protein 1 OS=Homo sapiens GN=BASP1 PE=1 SV=2	5.29122	0.00678068	0.00313017	2.04391	0.186103
P49257	Protein ERGIC-53 OS=Homo sapiens GN=LMAN1 PE=1 SV=2	7.34108	0.00155719	0.0133781	2.08642	0.170598
P60468	Protein transport protein Sec61 subunit beta OS=Homo sapiens GN=SEC61B PE=1 SV=2	7.56291	0.00134781	0.0311777	2.11405	0.097144
O43852	Calumenin OS=Homo sapiens GN=CALU PE=1 SV=2	6.26879	0.00325289	0.0227169	2.13255	0.286023
P61619	Protein transport protein Sec61 subunit alpha isoform 1 OS=Homo sapiens GN=SEC61A1 PE=1 SV=2	6.79075	0.00225386	0.00618802	2.20021	0.142531
P63000	Ras-related C3 botulinum toxin substrate 1 OS=Homo sapiens GN=RAC1 PE=1 SV=1	2.62379	0.074554	0.0297831	2.22007	0.162774
P29692	Elongation factor 1-delta OS=Homo sapiens GN=EEF1D PE=1 SV=5	16.1025	2.0392e-05	0.00088843	2.23234	0.12711
P50570	Dynamin-2 OS=Homo sapiens GN=DNM2 PE=1 SV=2	2.31275	0.103046	0.0218595	2.30595	0.15326
P18669	Phosphoglycerate mutase 1 OS=Homo sapiens GN=PGAM1 PE=1 SV=2	24.7403	1.30106e-06	9.29752e-05	2.32813	0.133966
P26639	Threonyl-tRNA synthetase, cytoplasmic OS=Homo sapiens GN=TARS PE=1 SV=3	5.62475	0.00523875	0.00709711	2.35319	0.231438
P46459	Vesicle-fusing ATPase OS=Homo sapiens GN=NSF PE=1 SV=3	1.88794	0.162701	0.048657	2.42789	0.273152
O60763	General vesicular transport factor p115 OS=Homo sapiens GN=USO1 PE=1 SV=2	2.63776	0.0734941	0.0326963	2.45182	0.217041
P58546	Myotrophin OS=Homo sapiens GN=MTPN PE=1 SV=2	3.62993	0.027956	0.0175517	2.48398	0.203842
P13693	Translationally-controlled tumor protein OS=Homo sapiens GN=TPT1 PE=1 SV=1	2.29935	0.104514	0.0331508	2.48824	0.174663
P54920	Alpha-soluble NSF attachment protein OS=Homo sapiens GN=NAPA PE=1 SV=3	3.72655	0.0255756	0.0366012	2.5329	0.24555
P56134	ATP synthase subunit f, mitochondrial OS=Homo sapiens GN=ATP5J2 PE=1 SV=3	4.18927	0.0169006	0.0195868	2.53607	0.131799
Q9UNF0	Protein kinase C and casein kinase substrate in neurons protein 2 OS=Homo sapiens GN=PACSIN2 PE=1 SV=2	8.04477	0.00099343	0.00240702	2.53678	0.154147
Q13347	Eukaryotic translation initiation factor 3 subunit I OS=Homo sapiens GN=EIF3I PE=1 SV=1	10.6008	0.000468593	0.0296488	2.55049	0.146637
P08107	Heat shock 70 kDa protein 1A/1B OS=Homo sapiens GN=HSPA1A PE=1 SV=5	9.97123	0.000325534	0.000557851	2.67068	0.158271
P23381	Tryptophanyl-tRNA synthetase, cytoplasmic OS=Homo sapiens GN=WARS PE=1 SV=2	27.6063	6.23767e-07	3.09917e-05	2.70506	0.126079
P84095	Rho-related GTP-binding protein RhoG OS=Homo sapiens GN=RHOG PE=1 SV=1	5.79072	0.00462107	0.00349174	2.71952	0.135325
Q99460	26S proteasome non-ATPase regulatory subunit 1 OS=Homo sapiens GN=PSMD1 PE=1 SV=2	4.92279	0.00910324	0.0335744	2.73144	0.193985
Q9NUQ9	Protein FAM49B OS=Homo sapiens GN=FAM49B PE=1 SV=1	6.99204	0.00196489	0.011312	2.74636	0.214686
Q9H2U2	Inorganic pyrophosphatase 2, mitochondrial OS=Homo sapiens GN=PPA2 PE=1 SV=2	4.88373	0.00939775	0.0218492	2.75722	0.26854
Q9H4M9	EH domain-containing protein 1 OS=Homo sapiens GN=EHD1 PE=1 SV=2	6.57131	0.00434813	0.015031	2.76498	0.20255
Q16563	Synaptophysin-like protein 1 OS=Homo sapiens GN=SYPL1 PE=1 SV=1	4.80367	0.0146093	0.0179959	2.77148	0.139688
Q9H299	SH3 domain-binding glutamic acid-rich-like protein 3 OS=Homo sapiens GN=SH3BGRL3 PE=1 SV=1	6.58742	0.00259508	0.00958678	2.7956	0.268054
Q13404	Ubiquitin-conjugating enzyme E2 variant 1 OS=Homo sapiens GN=UBE2V1 PE=1 SV=2	7.53553	0.00137185	0.011436	2.79658	0.144594
P43490	Nicotinamide phosphoribosyltransferase OS=Homo sapiens GN=NAMPT PE=1 SV=1	5.79923	0.00459169	0.0315083	2.86964	0.276748
P48047	ATP synthase subunit O, mitochondrial OS=Homo sapiens GN=ATP5O PE=1 SV=1	5.84539	0.00443582	0.00714876	2.90175	0.197499
P52209	6-phosphogluconate dehydrogenase, decarboxylating OS=Homo sapiens GN=PGD PE=1 SV=3	37.8276	7.10079e-08	3.09917e-05	2.90342	0.15496
P84090	Enhancer of rudimentary homolog OS=Homo sapiens GN=ERH PE=1 SV=1	4.07352	0.0187122	0.00716942	2.90528	0.161703
Q9H444	Charged multivesicular body protein 4b OS=Homo sapiens GN=CHMP4B PE=1 SV=1	5.51466	0.0056994	0.0150103	2.91132	0.188822
P31949	Protein S100-A11 OS=Homo sapiens GN=S100A11 PE=1 SV=2	7.39806	0.00150012	0.00315083	2.95328	0.209544
P42126	Enoyl-CoA delta isomerase 1, mitochondrial OS=Homo sapiens GN=ECI1 PE=1 SV=1	7.54301	0.00239458	0.0326963	2.96567	0.154027
P36543	V-type proton ATPase subunit E 1 OS=Homo sapiens GN=ATP6V1E1 PE=1 SV=1	6.60239	0.00256807	0.0361983	2.98779	0.177616
P18085	ADP-ribosylation factor 4 OS=Homo sapiens GN=ARF4 PE=1 SV=3	5.60331	0.00532509	0.00974174	3.09263	0.2299
Q14847	LIM and SH3 domain protein 1 OS=Homo sapiens GN=LASP1 PE=1 SV=2	9.54624	0.000792711	0.00369835	3.19833	0.159306
P09382	Galectin-1 OS=Homo sapiens GN=LGALS1 PE=1 SV=2	10.3359	0.000267935	0.00403926	3.34045	0.202029
P30626	Sorcin OS=Homo sapiens GN=SRI PE=1 SV=1	4.75602	0.0104376	0.00417355	3.43441	0.138269
Q96AG4	Leucine-rich repeat-containing protein 59 OS=Homo sapiens GN=LRRC59 PE=1 SV=1	18.8163	7.71271e-06	0.000650826	3.4393	0.167037
Q9Y617	Phosphoserine aminotransferase OS=Homo sapiens GN=PSAT1 PE=1 SV=2	16.0413	2.08736e-05	0.000216942	3.62373	0.233351
P49721	Proteasome subunit beta type-2 OS=Homo sapiens GN=PSMB2 PE=1 SV=1	20.6204	4.2935e-06	0.00307851	3.63428	0.138081
P69905	Hemoglobin subunit alpha OS=Homo sapiens GN=HBA1 PE=1 SV=2	13.4404	6.0426e-05	0.00329545	3.7634	0.188403
O95831	Apoptosis-inducing factor 1, mitochondrial OS=Homo sapiens GN=AIFM1 PE=1 SV=1	5.25919	0.00695372	0.0210537	3.91288	0.256691
Q9NX40	OCIA domain-containing protein 1 OS=Homo sapiens GN=OCIAD1 PE=1 SV=1	5.88325	0.0043124	0.00933884	4.21719	0.225895
Q9GZT3	SRA stem-loop-interacting RNA-binding protein, mitochondrial OS=Homo sapiens GN=SLIRP PE=1 SV=1	7.55351	0.00135601	0.00677686	4.55968	0.173402
P23193	Transcription elongation factor A protein 1 OS=Homo sapiens GN=TCEA1 PE=1 SV=2	4.03134	0.0194253	0.01125	4.63428	0.232833
P11413	Glucose-6-phosphate 1-dehydrogenase OS=Homo sapiens GN=G6PD PE=1 SV=4	79.9094	3.13019e-10	0	4.83124	0.097643
P18859	ATP synthase-coupling factor 6, mitochondrial OS=Homo sapiens GN=ATP5J PE=1 SV=1	6.56879	0.00262914	0.0157128	5.07991	0.265537
Q15942	Zyxin OS=Homo sapiens GN=ZYX PE=1 SV=1	26.5025	8.21255e-07	0.000123967	5.42561	0.118837
P28062	Proteasome subunit beta type-8 OS=Homo sapiens GN=PSMB8 PE=1 SV=3	3.45086	0.0330466	0.00655992	5.77298	0.208625
P40121	Macrophage-capping protein OS=Homo sapiens GN=CAPG PE=1 SV=2	16.0152	2.10836e-05	0.00035124	5.81944	0.2469
P07339	Cathepsin D OS=Homo sapiens GN=CTSD PE=1 SV=1	84.4355	2.07673e-10	1.03306e-05	6.54327	0.167726
O14745	Na(+)/H(+) exchange regulatory cofactor NHE-RF1 OS=Homo sapiens GN=SLC9A3R1 PE=1 SV=4	13.0272	7.25492e-05	0.00102273	6.54859	0.217269
P50552	Vasodilator-stimulated phosphoprotein OS=Homo sapiens GN=VASP PE=1 SV=3	21.1747	3.61654e-06	0.000134298	8.72538	0.262996

## Sheet: Yes-set 96h (all DEPs)
ID	annotation	F.stat	p.value	pvals.0h.96	ER.96.0h	CV
P78527	DNA-dependent protein kinase catalytic subunit OS=Homo sapiens GN=PRKDC PE=1 SV=3	14.5408	3.78707e-05	2.23464e-05	0.0965767	0.29326
P22102	Trifunctional purine biosynthetic protein adenosine-3 OS=Homo sapiens GN=GART PE=1 SV=1	18.4726	8.66759e-06	0	0.103955	0.140941
P02786	Transferrin receptor protein 1 OS=Homo sapiens GN=TFRC PE=1 SV=2	16.4686	1.77567e-05	2.23464e-05	0.104288	0.21475
Q9NZI8	Insulin-like growth factor 2 mRNA-binding protein 1 OS=Homo sapiens GN=IGF2BP1 PE=1 SV=2	6.5493	0.00266531	0.000212291	0.116673	0.226882
Q9NSD9	Phenylalanyl-tRNA synthetase beta chain OS=Homo sapiens GN=FARSB PE=1 SV=3	8.4148	0.000791939	0.000223464	0.137504	0.211029
P49736	DNA replication licensing factor MCM2 OS=Homo sapiens GN=MCM2 PE=1 SV=4	20.543	4.39893e-06	0	0.145374	0.180561
Q13148	TAR DNA-binding protein 43 OS=Homo sapiens GN=TARDBP PE=1 SV=1	7.12357	0.00179862	0.000134078	0.146008	0.162489
P52597	Heterogeneous nuclear ribonucleoprotein F OS=Homo sapiens GN=HNRNPF PE=1 SV=3	19.6085	5.9315e-06	0	0.147709	0.113268
Q9NR30	Nucleolar RNA helicase 2 OS=Homo sapiens GN=DDX21 PE=1 SV=5	8.63414	0.000694417	0.000223464	0.151633	0.249198
P33992	DNA replication licensing factor MCM5 OS=Homo sapiens GN=MCM5 PE=1 SV=5	12.9268	7.58911e-05	0	0.152447	0.188924
P43243	Matrin-3 OS=Homo sapiens GN=MATR3 PE=1 SV=2	22.0356	2.79058e-06	0	0.157339	0.171568
P39748	Flap endonuclease 1 OS=Homo sapiens GN=FEN1 PE=1 SV=1	7.24743	0.00165638	0.000134078	0.161457	0.181928
P27708	CAD protein OS=Homo sapiens GN=CAD PE=1 SV=3	10.0496	0.000312059	4.46927e-05	0.180414	0.102268
P31942	Heterogeneous nuclear ribonucleoprotein H3 OS=Homo sapiens GN=HNRNPH3 PE=1 SV=2	5.91754	0.00420395	0.00024581	0.183754	0.162012
Q16543	Hsp90 co-chaperone Cdc37 OS=Homo sapiens GN=CDC37 PE=1 SV=1	7.22436	0.00168188	0.000446927	0.194868	0.186392
P17844	Probable ATP-dependent RNA helicase DDX5 OS=Homo sapiens GN=DDX5 PE=1 SV=1	11.6903	0.000135154	0.000134078	0.202745	0.184448
Q04637	Eukaryotic translation initiation factor 4 gamma 1 OS=Homo sapiens GN=EIF4G1 PE=1 SV=4	4.20692	0.0166421	0.000994413	0.204801	0.192277
Q8WW12	PEST proteolytic signal-containing nuclear protein OS=Homo sapiens GN=PCNP PE=1 SV=2	4.07898	0.0186219	0.00224581	0.209068	0.200898
P48595	Serpin B10 OS=Homo sapiens GN=SERPINB10 PE=1 SV=1	18.5443	8.45794e-06	0	0.210243	0.184472
O76094	Signal recognition particle 72 kDa protein OS=Homo sapiens GN=SRP72 PE=1 SV=3	5.13887	0.00764942	0.00464804	0.213748	0.191836
Q9Y266	Nuclear migration protein nudC OS=Homo sapiens GN=NUDC PE=1 SV=1	6.27732	0.00323302	0.00465922	0.216088	0.219234
Q13435	Splicing factor 3B subunit 2 OS=Homo sapiens GN=SF3B2 PE=1 SV=2	6.18653	0.00345181	0.00149721	0.21657	0.244401
P09874	Poly [ADP-ribose] polymerase 1 OS=Homo sapiens GN=PARP1 PE=1 SV=4	27.5901	6.26237e-07	0	0.219053	0.177386
Q9NYF8	Bcl-2-associated transcription factor 1 OS=Homo sapiens GN=BCLAF1 PE=1 SV=2	5.02954	0.00834966	0.00656983	0.220573	0.238786
Q9BTT0	Acidic leucine-rich nuclear phosphoprotein 32 family member E OS=Homo sapiens GN=ANP32E PE=1 SV=1	5.9004	0.0042578	0.00256983	0.22069	0.21723
Q9UHX1	Poly(U)-binding-splicing factor PUF60 OS=Homo sapiens GN=PUF60 PE=1 SV=1	4.55266	0.0123697	0.00122905	0.221724	0.178551
Q9BY32	Inosine triphosphate pyrophosphatase OS=Homo sapiens GN=ITPA PE=1 SV=2	3.13649	0.0446627	0.00267039	0.227953	0.186783
P25205	DNA replication licensing factor MCM3 OS=Homo sapiens GN=MCM3 PE=1 SV=3	25.6116	1.03285e-06	0	0.230412	0.138181
P31689	DnaJ homolog subfamily A member 1 OS=Homo sapiens GN=DNAJA1 PE=1 SV=2	3.26599	0.0394044	0.00464804	0.237949	0.222845
P61289	Proteasome activator complex subunit 3 OS=Homo sapiens GN=PSME3 PE=1 SV=1	13.1654	6.82119e-05	7.82123e-05	0.24742	0.170797
P42704	Leucine-rich PPR motif-containing protein, mitochondrial OS=Homo sapiens GN=LRPPRC PE=1 SV=3	32.682	1.96721e-07	0	0.252685	0.132484
A6NHR9	Structural maintenance of chromosomes flexible hinge domain-containing protein 1 OS=Homo sapiens GN=SMCHD1 PE=1 SV=2	6.54028	0.00268225	0.000234637	0.254078	0.118226
O00567	Nucleolar protein 56 OS=Homo sapiens GN=NOP56 PE=1 SV=4	6.31895	0.00313793	0.0012067	0.255935	0.23305
P39023	60S ribosomal protein L3 OS=Homo sapiens GN=RPL3 PE=1 SV=2	4.42085	0.0138344	0.00656983	0.262176	0.227922
Q15459	Splicing factor 3A subunit 1 OS=Homo sapiens GN=SF3A1 PE=1 SV=1	9.36814	0.000454108	8.93855e-05	0.266139	0.130249
Q8TEX9	Importin-4 OS=Homo sapiens GN=IPO4 PE=1 SV=2	11.9152	0.000121302	0.000134078	0.26643	0.171203
Q15056	Eukaryotic translation initiation factor 4H OS=Homo sapiens GN=EIF4H PE=1 SV=5	5.70055	0.00494587	0.000268156	0.26664	0.154004
P33991	DNA replication licensing factor MCM4 OS=Homo sapiens GN=MCM4 PE=1 SV=5	27.7612	6.00602e-07	0	0.272502	0.0775663
Q9Y383	Putative RNA-binding protein Luc7-like 2 OS=Homo sapiens GN=LUC7L2 PE=1 SV=2	3.74867	0.0250629	0.00388827	0.273546	0.251854
P60842	Eukaryotic initiation factor 4A-I OS=Homo sapiens GN=EIF4A1 PE=1 SV=1	6.25645	0.0032819	0.00073743	0.276742	0.245915
Q9Y2W1	Thyroid hormone receptor-associated protein 3 OS=Homo sapiens GN=THRAP3 PE=1 SV=2	3.82617	0.0233546	0.00861453	0.284893	0.196379
P49321	Nuclear autoantigenic sperm protein OS=Homo sapiens GN=NASP PE=1 SV=2	10.7618	0.000214679	4.46927e-05	0.288899	0.127949
Q14978	Nucleolar and coiled-body phosphoprotein 1 OS=Homo sapiens GN=NOLC1 PE=1 SV=2	7.38882	0.00150921	0.00027933	0.298154	0.200759
P33993	DNA replication licensing factor MCM7 OS=Homo sapiens GN=MCM7 PE=1 SV=4	16.2669	1.91577e-05	0	0.30029	0.141262
Q13263	Transcription intermediary factor 1-beta OS=Homo sapiens GN=TRIM28 PE=1 SV=5	7.31034	0.00158899	0.000134078	0.307547	0.172594
Q9P2J5	Leucyl-tRNA synthetase, cytoplasmic OS=Homo sapiens GN=LARS PE=1 SV=2	6.75984	0.00230232	0.00160894	0.307581	0.28031
P62316	Small nuclear ribonucleoprotein Sm D2 OS=Homo sapiens GN=SNRPD2 PE=1 SV=1	1.29159	0.315552	0.0298771	0.308893	0.249379
Q92922	SWI/SNF complex subunit SMARCC1 OS=Homo sapiens GN=SMARCC1 PE=1 SV=3	2.66078	0.0717848	0.00512849	0.316527	0.195724
P62753	40S ribosomal protein S6 OS=Homo sapiens GN=RPS6 PE=1 SV=1	2.63553	0.0736622	0.0070838	0.322239	0.197225
O00429	Dynamin-1-like protein OS=Homo sapiens GN=DNM1L PE=1 SV=2	4.63033	0.0115882	0.00242458	0.323571	0.175193
Q15717	ELAV-like protein 1 OS=Homo sapiens GN=ELAVL1 PE=1 SV=2	2.11283	0.1275	0.0082905	0.324976	0.23878
Q14566	DNA replication licensing factor MCM6 OS=Homo sapiens GN=MCM6 PE=1 SV=1	6.69938	0.00240053	0.000256983	0.329714	0.185047
P55060	Exportin-2 OS=Homo sapiens GN=CSE1L PE=1 SV=3	6.95675	0.0020124	0.000424581	0.330938	0.228035
P42167	Lamina-associated polypeptide 2, isoforms beta/gamma OS=Homo sapiens GN=TMPO PE=1 SV=2	4.25103	0.0160147	0.00949721	0.332555	0.208764
Q05519	Serine/arginine-rich splicing factor 11 OS=Homo sapiens GN=SRSF11 PE=1 SV=1	1.78953	0.181248	0.0248156	0.333089	0.208208
Q15233	Non-POU domain-containing octamer-binding protein OS=Homo sapiens GN=NONO PE=1 SV=4	9.07766	0.00053579	4.46927e-05	0.333421	0.159429
Q9NRK6	ATP-binding cassette sub-family B member 10, mitochondrial OS=Homo sapiens GN=ABCB10 PE=1 SV=2	7.96593	0.0124387	0.0072514	0.342294	0.136156
Q9H773	dCTP pyrophosphatase 1 OS=Homo sapiens GN=DCTPP1 PE=1 SV=1	2.16595	0.120442	0.0119777	0.345147	0.247634
P36578	60S ribosomal protein L4 OS=Homo sapiens GN=RPL4 PE=1 SV=5	2.44422	0.0897661	0.0105251	0.35115	0.215212
Q14498	RNA-binding protein 39 OS=Homo sapiens GN=RBM39 PE=1 SV=2	6.25407	0.00328753	0.00073743	0.352958	0.0952878
P52272	Heterogeneous nuclear ribonucleoprotein M OS=Homo sapiens GN=HNRNPM PE=1 SV=3	5.10746	0.0078436	0.000726257	0.358268	0.256163
P43487	Ran-specific GTPase-activating protein OS=Homo sapiens GN=RANBP1 PE=1 SV=1	1.42649	0.271311	0.0255978	0.361072	0.241246
Q15637	Splicing factor 1 OS=Homo sapiens GN=SF1 PE=1 SV=4	3.95651	0.020766	0.00102793	0.36363	0.167374
Q8WXF1	Paraspeckle component 1 OS=Homo sapiens GN=PSPC1 PE=1 SV=1	2.38404	0.0955982	0.0132514	0.367851	0.209295
P30566	Adenylosuccinate lyase OS=Homo sapiens GN=ADSL PE=1 SV=2	5.00047	0.00854772	0.00392179	0.370499	0.26554
A6NKZ8	Putative tubulin beta chain-like protein ENSP00000290377 OS=Homo sapiens PE=5 SV=2	4.69976	0.010936	0.00146369	0.370906	0.18477
Q8NCW5	Apolipoprotein A-I-binding protein OS=Homo sapiens GN=APOA1BP PE=1 SV=2	3.63014	0.0364635	0.0277877	0.375003	0.15154
Q92499	ATP-dependent RNA helicase DDX1 OS=Homo sapiens GN=DDX1 PE=1 SV=2	4.76007	0.0104027	0.00693855	0.3786	0.28185
Q99417	C-Myc-binding protein OS=Homo sapiens GN=MYCBP PE=1 SV=3	2.60722	0.0758318	0.0121117	0.384403	0.156638
Q13813	Spectrin alpha chain, brain OS=Homo sapiens GN=SPTAN1 PE=1 SV=3	2.74585	0.0658345	0.00640223	0.385103	0.182606
O60610	Protein diaphanous homolog 1 OS=Homo sapiens GN=DIAPH1 PE=1 SV=2	6.13495	0.00358348	0.000681564	0.396515	0.187387
P62249	40S ribosomal protein S16 OS=Homo sapiens GN=RPS16 PE=1 SV=2	1.81484	0.176273	0.0341229	0.400325	0.265162
Q16629	Serine/arginine-rich splicing factor 7 OS=Homo sapiens GN=SRSF7 PE=1 SV=1	1.83838	0.171776	0.0238324	0.401058	0.22187
Q12931	Heat shock protein 75 kDa, mitochondrial OS=Homo sapiens GN=TRAP1 PE=1 SV=3	5.65588	0.00511618	0.00360894	0.402074	0.166839
P63279	SUMO-conjugating enzyme UBC9 OS=Homo sapiens GN=UBE2I PE=1 SV=1	3.26407	0.0394772	0.0476425	0.408435	0.17677
P20674	Cytochrome c oxidase subunit 5A, mitochondrial OS=Homo sapiens GN=COX5A PE=1 SV=2	7.91986	0.001074	0.0158436	0.408728	0.185616
Q08211	ATP-dependent RNA helicase A OS=Homo sapiens GN=DHX9 PE=1 SV=4	3.24625	0.0401598	0.0077095	0.409825	0.27337
P62899	60S ribosomal protein L31 OS=Homo sapiens GN=RPL31 PE=1 SV=1	6.44465	0.00286934	0.0274078	0.416918	0.129135
Q9Y285	Phenylalanyl-tRNA synthetase alpha chain OS=Homo sapiens GN=FARSA PE=1 SV=3	3.86752	0.0224963	0.00248045	0.421096	0.150665
Q7KZF4	Staphylococcal nuclease domain-containing protein 1 OS=Homo sapiens GN=SND1 PE=1 SV=1	8.30505	0.00084645	6.70391e-05	0.421189	0.148123
O43809	Cleavage and polyadenylation specificity factor subunit 5 OS=Homo sapiens GN=NUDT21 PE=1 SV=1	4.43638	0.0136521	0.00244693	0.423628	0.167311
P00441	Superoxide dismutase [Cu-Zn] OS=Homo sapiens GN=SOD1 PE=1 SV=2	2.04451	0.137238	0.0431844	0.435159	0.218936
P30520	Adenylosuccinate synthetase isozyme 2 OS=Homo sapiens GN=ADSS PE=1 SV=3	3.92019	0.0214536	0.0333408	0.438502	0.232475
P26640	Valyl-tRNA synthetase OS=Homo sapiens GN=VARS PE=1 SV=4	14.6092	3.68202e-05	0.000134078	0.441893	0.099088
Q9NXG2	THUMP domain-containing protein 1 OS=Homo sapiens GN=THUMPD1 PE=1 SV=2	2.64589	0.0728853	0.0239888	0.448427	0.09458
P14868	Aspartyl-tRNA synthetase, cytoplasmic OS=Homo sapiens GN=DARS PE=1 SV=2	6.0237	0.0038871	0.00331844	0.449624	0.15375
Q99439	Calponin-2 OS=Homo sapiens GN=CNN2 PE=1 SV=4	1.2137	0.3443	0.0264804	0.457186	0.168757
P08240	Signal recognition particle receptor subunit alpha OS=Homo sapiens GN=SRPR PE=1 SV=2	1.79765	0.179636	0.0186257	0.457314	0.195631
P11940	Polyadenylate-binding protein 1 OS=Homo sapiens GN=PABPC1 PE=1 SV=2	5.25884	0.00695567	0.000536313	0.459194	0.172066
O95373	Importin-7 OS=Homo sapiens GN=IPO7 PE=1 SV=1	5.83745	0.00446219	0.000905028	0.46141	0.132236
P35637	RNA-binding protein FUS OS=Homo sapiens GN=FUS PE=1 SV=1	4.03695	0.0193287	0.00213408	0.463593	0.165233
Q01081	Splicing factor U2AF 35 kDa subunit OS=Homo sapiens GN=U2AF1 PE=1 SV=3	2.72046	0.0675513	0.0145251	0.472034	0.141947
P11586	C-1-tetrahydrofolate synthase, cytoplasmic OS=Homo sapiens GN=MTHFD1 PE=1 SV=3	4.64299	0.0114661	0.000726257	0.472054	0.119184
P49327	Fatty acid synthase OS=Homo sapiens GN=FASN PE=1 SV=3	11.3855	0.000156867	3.35196e-05	0.473574	0.140357
Q16630	Cleavage and polyadenylation specificity factor subunit 6 OS=Homo sapiens GN=CPSF6 PE=1 SV=2	2.55595	0.0799413	0.0173296	0.483787	0.211982
Q96QK1	Vacuolar protein sorting-associated protein 35 OS=Homo sapiens GN=VPS35 PE=1 SV=2	2.76126	0.0648155	0.0121117	0.490014	0.257979
P16989	DNA-binding protein A OS=Homo sapiens GN=CSDA PE=1 SV=4	4.65071	0.0113924	0.004	0.492234	0.122941
O00571	ATP-dependent RNA helicase DDX3X OS=Homo sapiens GN=DDX3X PE=1 SV=3	3.88975	0.0220496	0.00176536	0.492633	0.122491
Q86V81	THO complex subunit 4 OS=Homo sapiens GN=THOC4 PE=1 SV=3	3.13928	0.0445415	0.00282682	0.493138	0.157289
O75396	Vesicle-trafficking protein SEC22b OS=Homo sapiens GN=SEC22B PE=1 SV=4	1.07007	0.404125	0.0407374	0.493247	0.149868
Q6P2Q9	Pre-mRNA-processing-splicing factor 8 OS=Homo sapiens GN=PRPF8 PE=1 SV=2	2.89628	0.0565945	0.0130838	0.495612	0.298531
Q96EP5	DAZ-associated protein 1 OS=Homo sapiens GN=DAZAP1 PE=1 SV=1	1.37417	0.287674	0.0497989	0.503305	0.224296
P38919	Eukaryotic initiation factor 4A-III OS=Homo sapiens GN=EIF4A3 PE=1 SV=4	2.79937	0.0623694	0.00740782	0.507179	0.124408
Q13283	Ras GTPase-activating protein-binding protein 1 OS=Homo sapiens GN=G3BP1 PE=1 SV=1	3.77527	0.0244613	0.00250279	0.507493	0.120924
Q92974	Rho guanine nucleotide exchange factor 2 OS=Homo sapiens GN=ARHGEF2 PE=1 SV=4	1.04707	0.414573	0.0308045	0.507572	0.147952
Q9Y2X3	Nucleolar protein 58 OS=Homo sapiens GN=NOP58 PE=1 SV=1	3.06332	0.0479738	0.0364134	0.509015	0.220549
P22626	Heterogeneous nuclear ribonucleoproteins A2/B1 OS=Homo sapiens GN=HNRNPA2B1 PE=1 SV=2	6.25592	0.00328315	0.000290503	0.512577	0.150822
Q9NZL9	Methionine adenosyltransferase 2 subunit beta OS=Homo sapiens GN=MAT2B PE=1 SV=1	1.62728	0.216873	0.039352	0.517788	0.143761
O43390	Heterogeneous nuclear ribonucleoprotein R OS=Homo sapiens GN=HNRNPR PE=1 SV=1	1.93276	0.154932	0.021095	0.525257	0.225163
Q12874	Splicing factor 3A subunit 3 OS=Homo sapiens GN=SF3A3 PE=1 SV=1	2.1007	0.129173	0.0117765	0.529009	0.135379
P31153	S-adenosylmethionine synthase isoform type-2 OS=Homo sapiens GN=MAT2A PE=1 SV=1	1.165	0.363563	0.0396648	0.530102	0.149085
Q01130	Serine/arginine-rich splicing factor 2 OS=Homo sapiens GN=SRSF2 PE=1 SV=4	1.0091	0.432375	0.0434525	0.535049	0.179784
P15311	Ezrin OS=Homo sapiens GN=EZR PE=1 SV=4	11.614	0.000140257	0.00332961	0.53946	0.183314
O75351	Vacuolar protein sorting-associated protein 4B OS=Homo sapiens GN=VPS4B PE=1 SV=2	1.93956	0.153788	0.0284693	0.545949	0.154558
P12004	Proliferating cell nuclear antigen OS=Homo sapiens GN=PCNA PE=1 SV=1	3.86172	0.0226146	0.0109721	0.548745	0.190711
P51991	Heterogeneous nuclear ribonucleoprotein A3 OS=Homo sapiens GN=HNRNPA3 PE=1 SV=2	4.40447	0.0140295	0.00181006	0.560349	0.139522
P19338	Nucleolin OS=Homo sapiens GN=NCL PE=1 SV=3	6.69538	0.0024072	0.000636872	0.566355	0.175366
P05455	Lupus La protein OS=Homo sapiens GN=SSB PE=1 SV=2	3.90561	0.0217369	0.00210056	0.587164	0.0973043
P05198	Eukaryotic translation initiation factor 2 subunit 1 OS=Homo sapiens GN=EIF2S1 PE=1 SV=3	3.66836	0.0269808	0.0212291	0.594504	0.0837955
P68363	Tubulin alpha-1B chain OS=Homo sapiens GN=TUBA1B PE=1 SV=1	12.1241	0.000109853	0.000793296	0.595239	0.152285
P01889	HLA class I histocompatibility antigen, B-7 alpha chain OS=Homo sapiens GN=HLA-B PE=1 SV=3	2.93756	0.0543154	0.0342793	0.60656	0.166716
P14866	Heterogeneous nuclear ribonucleoprotein L OS=Homo sapiens GN=HNRNPL PE=1 SV=2	1.60608	0.222043	0.0154078	0.626497	0.181703
P60228	Eukaryotic translation initiation factor 3 subunit E OS=Homo sapiens GN=EIF3E PE=1 SV=1	4.05871	0.0189591	0.0178436	0.632946	0.145042
Q00839	Heterogeneous nuclear ribonucleoprotein U OS=Homo sapiens GN=HNRNPU PE=1 SV=6	4.44118	0.0135963	0.00827933	0.633511	0.183401
P99999	Cytochrome c OS=Homo sapiens GN=CYCS PE=1 SV=2	2.92019	0.0552622	0.0108492	0.633902	0.140909
P23246	Splicing factor, proline- and glutamine-rich OS=Homo sapiens GN=SFPQ PE=1 SV=2	2.47851	0.0866176	0.00659218	0.638945	0.178066
P40227	T-complex protein 1 subunit zeta OS=Homo sapiens GN=CCT6A PE=1 SV=3	3.83617	0.0231437	0.00660335	0.644009	0.188173
Q14152	Eukaryotic translation initiation factor 3 subunit A OS=Homo sapiens GN=EIF3A PE=1 SV=1	1.1079	0.387473	0.0442458	0.644418	0.159146
P63241	Eukaryotic translation initiation factor 5A-1 OS=Homo sapiens GN=EIF5A PE=1 SV=2	1.59126	0.225736	0.0291061	0.644894	0.187161
O00410	Importin-5 OS=Homo sapiens GN=IPO5 PE=1 SV=4	4.90294	0.00925159	0.00468156	0.647567	0.10877
Q15046	Lysyl-tRNA synthetase OS=Homo sapiens GN=KARS PE=1 SV=3	2.60647	0.0758903	0.0352179	0.655855	0.147915
P07814	Bifunctional aminoacyl-tRNA synthetase OS=Homo sapiens GN=EPRS PE=1 SV=5	2.13904	0.123964	0.0250838	0.669258	0.204007
P61158	Actin-related protein 3 OS=Homo sapiens GN=ACTR3 PE=1 SV=3	5.12522	0.00773312	0.00223464	1.507	0.0962757
P07108	Acyl-CoA-binding protein OS=Homo sapiens GN=DBI PE=1 SV=2	4.81483	0.00994355	0.0232067	1.50768	0.138829
P27824	Calnexin OS=Homo sapiens GN=CANX PE=1 SV=2	5.99588	0.00396747	0.00186592	1.50889	0.129851
P13796	Plastin-2 OS=Homo sapiens GN=LCP1 PE=1 SV=6	13.5167	5.84474e-05	0.000223464	1.51926	0.097462
P14625	Endoplasmin OS=Homo sapiens GN=HSP90B1 PE=1 SV=1	8.89073	0.000597063	0.000223464	1.53343	0.080082
P05388	60S acidic ribosomal protein P0 OS=Homo sapiens GN=RPLP0 PE=1 SV=1	6.04822	0.00381777	0.0215531	1.53518	0.17039
Q00610	Clathrin heavy chain 1 OS=Homo sapiens GN=CLTC PE=1 SV=5	3.90701	0.0217094	0.0101564	1.54757	0.177442
P30040	Endoplasmic reticulum resident protein 29 OS=Homo sapiens GN=ERP29 PE=1 SV=4	2.89002	0.0569492	0.00414525	1.55807	0.123667
P80723	Brain acid soluble protein 1 OS=Homo sapiens GN=BASP1 PE=1 SV=2	5.29122	0.00678068	0.0312179	1.55956	0.186103
P53999	Activated RNA polymerase II transcriptional coactivator p15 OS=Homo sapiens GN=SUB1 PE=1 SV=3	2.07233	0.13318	0.0208603	1.56067	0.159147
P05141	ADP/ATP translocase 2 OS=Homo sapiens GN=SLC25A5 PE=1 SV=7	1.48287	0.254735	0.0209609	1.5626	0.137282
O15511	Actin-related protein 2/3 complex subunit 5 OS=Homo sapiens GN=ARPC5 PE=1 SV=3	1.9413	0.153496	0.0210615	1.56692	0.113957
O00299	Chloride intracellular channel protein 1 OS=Homo sapiens GN=CLIC1 PE=1 SV=4	2.85069	0.0592343	0.0334078	1.57589	0.231063
P25787	Proteasome subunit alpha type-2 OS=Homo sapiens GN=PSMA2 PE=1 SV=2	4.38979	0.0142071	0.0226257	1.57961	0.147832
Q14697	Neutral alpha-glucosidase AB OS=Homo sapiens GN=GANAB PE=1 SV=3	6.7761	0.00227669	0.000424581	1.59961	0.107733
P28070	Proteasome subunit beta type-4 OS=Homo sapiens GN=PSMB4 PE=1 SV=4	2.59227	0.0770058	0.0348603	1.61902	0.179428
Q13011	Delta(3,5)-Delta(2,4)-dienoyl-CoA isomerase, mitochondrial OS=Homo sapiens GN=ECH1 PE=1 SV=2	4.14267	0.0176054	0.00156425	1.61938	0.105856
P30050	60S ribosomal protein L12 OS=Homo sapiens GN=RPL12 PE=1 SV=1	1.75984	0.187275	0.0213073	1.63127	0.18069
P49720	Proteasome subunit beta type-3 OS=Homo sapiens GN=PSMB3 PE=1 SV=2	2.64023	0.0733087	0.0189497	1.63807	0.134525
P46777	60S ribosomal protein L5 OS=Homo sapiens GN=RPL5 PE=1 SV=3	9.05012	0.000544356	0.00381006	1.63869	0.11148
P20645	Cation-dependent mannose-6-phosphate receptor OS=Homo sapiens GN=M6PR PE=1 SV=1	3.55258	0.0300395	0.0130391	1.64703	0.11185
O00231	26S proteasome non-ATPase regulatory subunit 11 OS=Homo sapiens GN=PSMD11 PE=1 SV=3	2.55339	0.0801526	0.0260335	1.64828	0.10336
Q14019	Coactosin-like protein OS=Homo sapiens GN=COTL1 PE=1 SV=3	6.92181	0.00206071	0.0087933	1.66082	0.111926
Q9H4A4	Aminopeptidase B OS=Homo sapiens GN=RNPEP PE=1 SV=2	1.91611	0.15777	0.0376089	1.66386	0.140085
P13804	Electron transfer flavoprotein subunit alpha, mitochondrial OS=Homo sapiens GN=ETFA PE=1 SV=1	4.20074	0.016732	0.00703911	1.66598	0.139667
P60660	Myosin light polypeptide 6 OS=Homo sapiens GN=MYL6 PE=1 SV=2	14.968	3.18165e-05	0.000324022	1.70095	0.0704165
Q86UX7	Fermitin family homolog 3 OS=Homo sapiens GN=FERMT3 PE=1 SV=1	3.77449	0.0244786	0.0324581	1.70509	0.23466
P62310	U6 snRNA-associated Sm-like protein LSm3 OS=Homo sapiens GN=LSM3 PE=1 SV=2	3.34789	0.0364343	0.0488492	1.73429	0.0966307
P49588	Alanyl-tRNA synthetase, cytoplasmic OS=Homo sapiens GN=AARS PE=1 SV=2	4.6691	0.0112188	0.00235754	1.73899	0.188095
Q92597	Protein NDRG1 OS=Homo sapiens GN=NDRG1 PE=1 SV=1	1.92972	0.155445	0.0341341	1.74001	0.128576
Q04837	Single-stranded DNA-binding protein, mitochondrial OS=Homo sapiens GN=SSBP1 PE=1 SV=1	3.33851	0.0367617	0.0138101	1.78416	0.187517
O14773	Tripeptidyl-peptidase 1 OS=Homo sapiens GN=TPP1 PE=1 SV=2	1.52871	0.242027	0.0282905	1.79391	0.167426
Q5VU58	Tropomyosin 3 OS=Homo sapiens GN=TPM3 PE=2 SV=1	2.47427	0.0870001	0.0096648	1.79665	0.229227
P30046	D-dopachrome decarboxylase OS=Homo sapiens GN=DDT PE=1 SV=3	2.96034	0.0531013	0.0150838	1.8004	0.0928998
P04632	Calpain small subunit 1 OS=Homo sapiens GN=CAPNS1 PE=1 SV=1	2.30023	0.104417	0.0431955	1.80317	0.17538
Q07021	Complement component 1 Q subcomponent-binding protein, mitochondrial OS=Homo sapiens GN=C1QBP PE=1 SV=1	2.1038	0.128743	0.0425028	1.80362	0.198204
O00754	Lysosomal alpha-mannosidase OS=Homo sapiens GN=MAN2B1 PE=1 SV=3	3.3311	0.0370226	0.00332961	1.83175	0.224621
P53618	Coatomer subunit beta OS=Homo sapiens GN=COPB1 PE=1 SV=3	4.56994	0.0121908	0.0303352	1.84188	0.14867
Q01518	Adenylyl cyclase-associated protein 1 OS=Homo sapiens GN=CAP1 PE=1 SV=5	21.8414	2.95651e-06	0.000223464	1.84635	0.0974773
P05387	60S acidic ribosomal protein P2 OS=Homo sapiens GN=RPLP2 PE=1 SV=1	11.9534	0.000119112	0.000446927	1.8663	0.122947
Q9HDC9	Adipocyte plasma membrane-associated protein OS=Homo sapiens GN=APMAP PE=1 SV=2	3.88835	0.0220773	0.00379888	1.87752	0.114595
P43307	Translocon-associated protein subunit alpha OS=Homo sapiens GN=SSR1 PE=1 SV=3	2.5512	0.0803343	0.0233073	1.87949	0.0836153
P40926	Malate dehydrogenase, mitochondrial OS=Homo sapiens GN=MDH2 PE=1 SV=3	14.0743	4.60114e-05	0.00027933	1.88903	0.117656
P62805	Histone H4 OS=Homo sapiens GN=HIST1H4A PE=1 SV=2	3.20059	0.0419691	0.00230168	1.91035	0.231573
Q6IBS0	Twinfilin-2 OS=Homo sapiens GN=TWF2 PE=1 SV=2	1.8528	0.169081	0.031162	1.91684	0.149264
P38117	Electron transfer flavoprotein subunit beta OS=Homo sapiens GN=ETFB PE=1 SV=3	3.03533	0.0603207	0.0364804	1.92598	0.148745
O96008	Mitochondrial import receptor subunit TOM40 homolog OS=Homo sapiens GN=TOMM40 PE=1 SV=1	2.62212	0.0746812	0.0102682	1.93185	0.15061
P04040	Catalase OS=Homo sapiens GN=CAT PE=1 SV=3	4.09542	0.0183535	0.00494972	1.9342	0.24118
Q96KP4	Cytosolic non-specific dipeptidase OS=Homo sapiens GN=CNDP2 PE=1 SV=2	12.5787	8.89069e-05	0.00103911	1.93894	0.161037
P23284	Peptidyl-prolyl cis-trans isomerase B OS=Homo sapiens GN=PPIB PE=1 SV=2	10.2936	0.000273989	0.000167598	1.97096	0.110984
P25788	Proteasome subunit alpha type-3 OS=Homo sapiens GN=PSMA3 PE=1 SV=2	2.87809	0.0576323	0.0434302	1.98541	0.198658
P08107	Heat shock 70 kDa protein 1A/1B OS=Homo sapiens GN=HSPA1A PE=1 SV=5	9.97123	0.000325534	0.00511732	1.98974	0.158271
P16403	Histone H1.2 OS=Homo sapiens GN=HIST1H1C PE=1 SV=2	3.2861	0.0386511	0.00268156	2.03655	0.225024
P35579	Myosin-9 OS=Homo sapiens GN=MYH9 PE=1 SV=4	78.9263	3.43194e-10	0	2.04789	0.0535566
O14818	Proteasome subunit alpha type-7 OS=Homo sapiens GN=PSMA7 PE=1 SV=1	6.52754	0.00270636	0.00431285	2.06793	0.180515
P23368	NAD-dependent malic enzyme, mitochondrial OS=Homo sapiens GN=ME2 PE=1 SV=1	5.28208	0.00682955	0.000446927	2.09771	0.123493
Q9UL25	Ras-related protein Rab-21 OS=Homo sapiens GN=RAB21 PE=1 SV=3	1.20461	0.34782	0.0363911	2.09806	0.177569
P51571	Translocon-associated protein subunit delta OS=Homo sapiens GN=SSR4 PE=1 SV=1	2.96789	0.0527055	0.00425698	2.10323	0.167017
Q9NYU2	UDP-glucose:glycoprotein glucosyltransferase 1 OS=Homo sapiens GN=UGGT1 PE=1 SV=3	6.42499	0.00290959	0.000357542	2.10843	0.143521
P08195	4F2 cell-surface antigen heavy chain OS=Homo sapiens GN=SLC3A2 PE=1 SV=3	3.01342	0.0503867	0.0067933	2.11511	0.175649
P56134	ATP synthase subunit f, mitochondrial OS=Homo sapiens GN=ATP5J2 PE=1 SV=3	4.18927	0.0169006	0.0380112	2.11688	0.131799
Q9NQC3	Reticulon-4 OS=Homo sapiens GN=RTN4 PE=1 SV=2	3.0114	0.0615917	0.0373631	2.12877	0.0985324
P30048	Thioredoxin-dependent peroxide reductase, mitochondrial OS=Homo sapiens GN=PRDX3 PE=1 SV=3	3.77081	0.0245611	0.00156425	2.13262	0.118074
P20618	Proteasome subunit beta type-1 OS=Homo sapiens GN=PSMB1 PE=1 SV=2	9.90731	0.000337005	0.00167598	2.15681	0.151859
Q14739	Lamin-B receptor OS=Homo sapiens GN=LBR PE=1 SV=2	2.12144	0.126325	0.0478994	2.18596	0.219583
P13667	Protein disulfide-isomerase A4 OS=Homo sapiens GN=PDIA4 PE=1 SV=2	15.9043	2.20008e-05	3.35196e-05	2.19353	0.0930432
P18206	Vinculin OS=Homo sapiens GN=VCL PE=1 SV=4	6.91345	0.00207246	0.00134078	2.19494	0.208383
P53634	Dipeptidyl peptidase 1 OS=Homo sapiens GN=CTSC PE=1 SV=2	5.71595	0.00488862	0.00528492	2.19575	0.227727
Q92882	Osteoclast-stimulating factor 1 OS=Homo sapiens GN=OSTF1 PE=1 SV=2	4.68058	0.011112	0.00403352	2.21242	0.0896807
P13693	Translationally-controlled tumor protein OS=Homo sapiens GN=TPT1 PE=1 SV=1	2.29935	0.104514	0.0455419	2.21485	0.174663
P36957	Dihydrolipoyllysine-residue succinyltransferase component of 2-oxoglutarate dehydrogenase complex, mitochondrial OS=Homo sapiens GN=DLST PE=1 SV=4	2.19194	0.129522	0.0317207	2.21627	0.142584
Q99623	Prohibitin-2 OS=Homo sapiens GN=PHB2 PE=1 SV=2	2.62838	0.0742036	0.0172179	2.22905	0.264969
P34897	Serine hydroxymethyltransferase, mitochondrial OS=Homo sapiens GN=SHMT2 PE=1 SV=3	5.08415	0.00799129	0.000949721	2.2344	0.209886
O14950	Myosin regulatory light chain 12B OS=Homo sapiens GN=MYL12B PE=1 SV=2	6.57029	0.00262638	0.010838	2.23888	0.214615
P25786	Proteasome subunit alpha type-1 OS=Homo sapiens GN=PSMA1 PE=1 SV=1	3.06509	0.0478906	0.00575419	2.26159	0.245076
P58546	Myotrophin OS=Homo sapiens GN=MTPN PE=1 SV=2	3.62993	0.027956	0.022067	2.28995	0.203842
P31930	Cytochrome b-c1 complex subunit 1, mitochondrial OS=Homo sapiens GN=UQCRC1 PE=1 SV=3	1.76949	0.185294	0.0113184	2.30051	0.266448
O00487	26S proteasome non-ATPase regulatory subunit 14 OS=Homo sapiens GN=PSMD14 PE=1 SV=1	2.41827	0.092232	0.00484916	2.32652	0.142407
P07602	Proactivator polypeptide OS=Homo sapiens GN=PSAP PE=1 SV=2	10.6152	0.00023153	0.000268156	2.32861	0.12752
Q96HY6	DDRGK domain-containing protein 1 OS=Homo sapiens GN=DDRGK1 PE=1 SV=2	2.2759	0.107141	0.0357989	2.34113	0.138912
P61326	Protein mago nashi homolog OS=Homo sapiens GN=MAGOH PE=1 SV=1	2.66126	0.0717492	0.0428715	2.34469	0.19242
Q9Y4L1	Hypoxia up-regulated protein 1 OS=Homo sapiens GN=HYOU1 PE=1 SV=1	14.1501	4.45639e-05	3.35196e-05	2.36439	0.161594
O60763	General vesicular transport factor p115 OS=Homo sapiens GN=USO1 PE=1 SV=2	2.63776	0.0734941	0.0317654	2.37018	0.217041
P84090	Enhancer of rudimentary homolog OS=Homo sapiens GN=ERH PE=1 SV=1	4.07352	0.0187122	0.0196648	2.37055	0.161703
O75367	Core histone macro-H2A.1 OS=Homo sapiens GN=H2AFY PE=1 SV=4	1.03978	0.41794	0.0427486	2.3715	0.145568
P29692	Elongation factor 1-delta OS=Homo sapiens GN=EEF1D PE=1 SV=5	16.1025	2.0392e-05	0.000391061	2.38454	0.12711
P26639	Threonyl-tRNA synthetase, cytoplasmic OS=Homo sapiens GN=TARS PE=1 SV=3	5.62475	0.00523875	0.00482682	2.40531	0.231438
P61619	Protein transport protein Sec61 subunit alpha isoform 1 OS=Homo sapiens GN=SEC61A1 PE=1 SV=2	6.79075	0.00225386	0.00167598	2.53602	0.142531
P23381	Tryptophanyl-tRNA synthetase, cytoplasmic OS=Homo sapiens GN=WARS PE=1 SV=2	27.6063	6.23767e-07	4.46927e-05	2.54455	0.126079
Q9NX63	Coiled-coil-helix-coiled-coil-helix domain-containing protein 3, mitochondrial OS=Homo sapiens GN=CHCHD3 PE=1 SV=1	1.9452	0.152846	0.0234413	2.55172	0.210791
O75340	Programmed cell death protein 6 OS=Homo sapiens GN=PDCD6 PE=1 SV=1	1.99928	0.144124	0.0217095	2.56022	0.11773
P18669	Phosphoglycerate mutase 1 OS=Homo sapiens GN=PGAM1 PE=1 SV=2	24.7403	1.30106e-06	4.46927e-05	2.58328	0.133966
P11021	78 kDa glucose-regulated protein OS=Homo sapiens GN=HSPA5 PE=1 SV=2	37.8312	7.09597e-08	0	2.58672	0.11487
P08133	Annexin A6 OS=Homo sapiens GN=ANXA6 PE=1 SV=3	36.7666	8.66908e-08	0	2.60159	0.105721
P00505	Aspartate aminotransferase, mitochondrial OS=Homo sapiens GN=GOT2 PE=1 SV=3	2.57694	0.0782303	0.00405587	2.63452	0.204895
P00367	Glutamate dehydrogenase 1, mitochondrial OS=Homo sapiens GN=GLUD1 PE=1 SV=2	9.40394	0.00044505	0.00027933	2.65262	0.193512
Q9Y2B0	Protein canopy homolog 2 OS=Homo sapiens GN=CNPY2 PE=1 SV=1	2.71306	0.0680615	0.0126816	2.66095	0.235198
Q00059	Transcription factor A, mitochondrial OS=Homo sapiens GN=TFAM PE=1 SV=1	1.63348	0.215386	0.017743	2.67005	0.233509
P61019	Ras-related protein Rab-2A OS=Homo sapiens GN=RAB2A PE=1 SV=1	3.19214	0.0686865	0.0313743	2.68639	0.199183
Q9H2U2	Inorganic pyrophosphatase 2, mitochondrial OS=Homo sapiens GN=PPA2 PE=1 SV=2	4.88373	0.00939775	0.0218547	2.68774	0.26854
P54709	Sodium/potassium-transporting ATPase subunit beta-3 OS=Homo sapiens GN=ATP1B3 PE=1 SV=1	5.09928	0.00789511	0.00176536	2.70318	0.149698
Q9UNF0	Protein kinase C and casein kinase substrate in neurons protein 2 OS=Homo sapiens GN=PACSIN2 PE=1 SV=2	8.04477	0.00099343	0.00103911	2.71644	0.154147
Q9NXJ5	Pyroglutamyl-peptidase 1 OS=Homo sapiens GN=PGPEP1 PE=1 SV=1	2.79586	0.074479	0.0165698	2.73198	0.206084
Q9H444	Charged multivesicular body protein 4b OS=Homo sapiens GN=CHMP4B PE=1 SV=1	5.51466	0.0056994	0.0152291	2.73323	0.188822
Q16563	Synaptophysin-like protein 1 OS=Homo sapiens GN=SYPL1 PE=1 SV=1	4.80367	0.0146093	0.0103017	3.00924	0.139688
Q14847	LIM and SH3 domain protein 1 OS=Homo sapiens GN=LASP1 PE=1 SV=2	9.54624	0.000792711	0.00434637	3.06634	0.159306
P31949	Protein S100-A11 OS=Homo sapiens GN=S100A11 PE=1 SV=2	7.39806	0.00150012	0.00174302	3.13572	0.209544
Q9H4M9	EH domain-containing protein 1 OS=Homo sapiens GN=EHD1 PE=1 SV=2	6.57131	0.00434813	0.00470391	3.14681	0.20255
P0C7P4	Putative cytochrome b-c1 complex subunit Rieske-like protein 1 OS=Homo sapiens GN=UQCRFS1P1 PE=5 SV=1	1.4504	0.266129	0.035162	3.15044	0.221753
Q96HE7	ERO1-like protein alpha OS=Homo sapiens GN=ERO1L PE=1 SV=2	6.19297	0.00343577	0.000882682	3.15435	0.175306
P49257	Protein ERGIC-53 OS=Homo sapiens GN=LMAN1 PE=1 SV=2	7.34108	0.00155719	0.000424581	3.16611	0.170598
Q9H299	SH3 domain-binding glutamic acid-rich-like protein 3 OS=Homo sapiens GN=SH3BGRL3 PE=1 SV=1	6.58742	0.00259508	0.00298324	3.19147	0.268054
P18085	ADP-ribosylation factor 4 OS=Homo sapiens GN=ARF4 PE=1 SV=3	5.60331	0.00532509	0.00472626	3.34501	0.2299
P52209	6-phosphogluconate dehydrogenase, decarboxylating OS=Homo sapiens GN=PGD PE=1 SV=3	37.8276	7.10079e-08	0	3.38791	0.15496
O75844	CAAX prenyl protease 1 homolog OS=Homo sapiens GN=ZMPSTE24 PE=1 SV=2	3.36336	0.0359018	0.0188268	3.41405	0.285844
P48047	ATP synthase subunit O, mitochondrial OS=Homo sapiens GN=ATP5O PE=1 SV=1	5.84539	0.00443582	0.00184358	3.47749	0.197499
P48556	26S proteasome non-ATPase regulatory subunit 8 OS=Homo sapiens GN=PSMD8 PE=1 SV=2	3.75126	0.0250035	0.022838	3.51859	0.208314
P60468	Protein transport protein Sec61 subunit beta OS=Homo sapiens GN=SEC61B PE=1 SV=2	7.56291	0.00134781	0.000726257	3.57261	0.097144
Q9Y617	Phosphoserine aminotransferase OS=Homo sapiens GN=PSAT1 PE=1 SV=2	16.0413	2.08736e-05	0.000167598	3.79195	0.233351
Q13404	Ubiquitin-conjugating enzyme E2 variant 1 OS=Homo sapiens GN=UBE2V1 PE=1 SV=2	7.53553	0.00137185	0.00130726	3.85698	0.144594
Q96AG4	Leucine-rich repeat-containing protein 59 OS=Homo sapiens GN=LRRC59 PE=1 SV=1	18.8163	7.71271e-06	0.000223464	3.9388	0.167037
Q9NUQ9	Protein FAM49B OS=Homo sapiens GN=FAM49B PE=1 SV=1	6.99204	0.00196489	0.000938547	4.03574	0.214686
O43852	Calumenin OS=Homo sapiens GN=CALU PE=1 SV=2	6.26879	0.00325289	0.00052514	4.18023	0.286023
P38606	V-type proton ATPase catalytic subunit A OS=Homo sapiens GN=ATP6V1A PE=1 SV=2	7.23896	0.00166569	0.000346369	4.18753	0.184826
P09382	Galectin-1 OS=Homo sapiens GN=LGALS1 PE=1 SV=2	10.3359	0.000267935	0.000581006	4.29597	0.202029
Q99460	26S proteasome non-ATPase regulatory subunit 1 OS=Homo sapiens GN=PSMD1 PE=1 SV=2	4.92279	0.00910324	0.00359777	4.42517	0.193985
P67812	Signal peptidase complex catalytic subunit SEC11A OS=Homo sapiens GN=SEC11A PE=1 SV=1	3.33319	0.0621737	0.0111508	4.51144	0.149496
P49721	Proteasome subunit beta type-2 OS=Homo sapiens GN=PSMB2 PE=1 SV=1	20.6204	4.2935e-06	0.000379888	4.92129	0.138081
Q9NX40	OCIA domain-containing protein 1 OS=Homo sapiens GN=OCIAD1 PE=1 SV=1	5.88325	0.0043124	0.00326257	5.08194	0.225895
O14745	Na(+)/H(+) exchange regulatory cofactor NHE-RF1 OS=Homo sapiens GN=SLC9A3R1 PE=1 SV=4	13.0272	7.25492e-05	0.00237989	5.18899	0.217269
P23193	Transcription elongation factor A protein 1 OS=Homo sapiens GN=TCEA1 PE=1 SV=2	4.03134	0.0194253	0.00548603	5.40385	0.232833
Q9BS26	Endoplasmic reticulum resident protein 44 OS=Homo sapiens GN=ERP44 PE=1 SV=1	3.56851	0.0295968	0.00221229	5.6941	0.228133
P40121	Macrophage-capping protein OS=Homo sapiens GN=CAPG PE=1 SV=2	16.0152	2.10836e-05	0.000324022	5.85543	0.2469
P43490	Nicotinamide phosphoribosyltransferase OS=Homo sapiens GN=NAMPT PE=1 SV=1	5.79923	0.00459169	0.000782123	5.92769	0.276748
P69905	Hemoglobin subunit alpha OS=Homo sapiens GN=HBA1 PE=1 SV=2	13.4404	6.0426e-05	0.000167598	6.2991	0.188403
P42126	Enoyl-CoA delta isomerase 1, mitochondrial OS=Homo sapiens GN=ECI1 PE=1 SV=1	7.54301	0.00239458	0.000648045	6.32522	0.154027
Q16881	Thioredoxin reductase 1, cytoplasmic OS=Homo sapiens GN=TXNRD1 PE=1 SV=3	3.48205	0.0320905	0.00312849	6.50456	0.219554
Q15942	Zyxin OS=Homo sapiens GN=ZYX PE=1 SV=1	26.5025	8.21255e-07	4.46927e-05	6.57438	0.118837
P11413	Glucose-6-phosphate 1-dehydrogenase OS=Homo sapiens GN=G6PD PE=1 SV=4	79.9094	3.13019e-10	0	7.698	0.097643
P50552	Vasodilator-stimulated phosphoprotein OS=Homo sapiens GN=VASP PE=1 SV=3	21.1747	3.61654e-06	0.000201117	8.2156	0.262996
P36543	V-type proton ATPase subunit E 1 OS=Homo sapiens GN=ATP6V1E1 PE=1 SV=1	6.60239	0.00256807	0.000413408	8.28549	0.177616
P18859	ATP synthase-coupling factor 6, mitochondrial OS=Homo sapiens GN=ATP5J PE=1 SV=1	6.56879	0.00262914	0.00116201	9.13429	0.265537
P07339	Cathepsin D OS=Homo sapiens GN=CTSD PE=1 SV=1	84.4355	2.07673e-10	0	13.4191	0.167726
